# Supplementary material for: Deep proteome profiling reveals signatures of age and sex differences in paw skin and sciatic nerve of naïve mice
Source: eLife. 2022 Nov 30;11:e81431. doi: 10.7554/eLife.81431 (PMC9711526; doi:10.7554/eLife.81431)
Supplement: Figure 1—source data 1. — DEPs from age- and sex-dependent comparisons are listed in separated sheets. [file elife-81431-fig1-data1.xlsx]

## Sheet: Skin_RawIntensity
Violet label	protein IDs quantified in all samples
	Skin_Ma4w						Skin_Fe4w								Skin_Ma14w								Skin_Fe14w
Gene Name	Skin-Ma4w1-1	Skin-Ma4w1-2	Skin-Ma4w2-1	Skin-Ma4w2-2	Skin-Ma4w3-1	Skin-Ma4w3-2	Skin-Fe4w1-1	Skin-Fe4w1-2	Skin-Fe4w2-1	Skin-Fe4w2-2	Skin-Fe4w3-1	Skin-Fe4w3-2	Skin-Fe4w4-1	Skin-Fe4w4-2	Skin-Ma14w1-1	Skin-Ma14w1-2	Skin-Ma14w2-1	Skin-Ma14w2-2	Skin-Ma14w3-1	Skin-Ma14w3-2	Skin-Ma14w4-1	Skin-Ma14w4-2	Skin-Fe14w1-1	Skin-Fe14w1-2	Skin-Fe14w2-1	Skin-Fe14w2-2	Skin-Fe14w3-1	Skin-Fe14w3-2	Skin-Fe14w4-1	Skin-Fe14w4-2
Slc12a2	27087.4	26446	18163.6	18034	21422.3	21815	13135.5	13429.9	19835	21546.7	16536.1	16187.5	27840.2	28000.5	12047.8	10632.3	19617.2	20056.8	12540.7	14911.1	5178.26	4891.51	21881	21814.8	18837.1	17265.1	13747.3	13352.5	16633.1	17322.3
Ipo9	4904.92	4611.67	4974.41	4727.39	5732.98	5718.5	5730.3	5271.99	5199.82	4864.67	4426.55	4375.62	4826.09	4671.35	5527.89	3604.33	4236.02	3543.53	3911.23	4355.07	3913.62	4111.42	4476.14	4892.79	5966.51	4507.59	3790.37	3846.25	4613.47	4621.07
Mapk1	48839.9	42422.3	48843.7	48163.7	49930.7	50977.6	48360.2	44856.1	47342.4	45437.9	51941.8	47962.1	51761.2	44738.4	50585.7	47125.7	47048.5	43907.8	44146.9	39562.9	56278.1	48829.8	44770.5	42682.9	47427.9	44968.4	43015.2	41651.1	47179.4	45170.6
Mapk3	32250	32642.6	31319.8	33624.5	31903	34335.6	28258.7	32636.5	34281.8	34192.9	30573.8	32479	32947.1	37421.4	35535.8	33599.3	29600.4	30839.5	28451.2	25943.8	29177.6	31436	32806.2	37103.4	34215.7	33412	32680.5	30396.3	32893.3	34868.6
Trim32	7792.89	6836.74	6259.37	6728.16	5880.49	8288.27	5509.75	6424.79	5718.79	7958.21	6427.5	5480.34	7214.17	7084.16	5490.01	6413.83	7008.44	5844.59	2461.49	7326.99	5772.88	4794.9	6355.5	5264.73	6605.77	6991.3	5874.84	5218.63	4287.7	4841.64
Sugt1	9128.58	10748.4	12874.5	11108.4	10504.3	11713.6	11971.4	10640.7	11998	10627.2	8441.01	10127.8	12725.4	11344.8	9079.6	7045.62	12793.7	10393.5	9551.88	11399	12656.9	11786.8	12582.8	12753.4	9951.21	10631.2	11774.4	11858.1	10637.7	9424.37
Ccz1	2361.56	2325.5	2442.63	2566.86	2429.97	2640.61	1840.02	2767.56	2655.1	2517.7	2594.62	2744.31	2519.35	3008.18	1920.68	2664.06	3217.74	3194.01	2855.33	2267.42	2603.77	2962.82	3003.96	2612.57	3601.72	2963.9	2555.19	3311.55	3136.63	2815.34
Get4	6767.94	7432.6	7244.49	7024.1	6344.31	6415.3	7302.2	7308.63	6740.51	5947.11	9887.02	7889.31	8885.49	7905.37	5440.96	3893.35	7863.92	10218.9	7351.97	7454.07	9499.55	8044.74	7859.43	8547	8697.58	8715.67	7643.37	7615.06	7078.63	7088.36
Hacd2	9629.05	10248.3	10391.9	10962.1	7943.58	8319.16	8503.49	10144.9	7822.48	9693.32	12945.4	13364.7	10596.3	9165.54	13607.8	13987.7	9565.63	10124.2	11863.8	11852.8	8921.6	9683.35	9389.49	10297.4	12359	11829.1	10095.3	11722.1	9082.06	12448.3
Vps51	5584.19	4520.7	4996.17	5161.88	4482.07	4855.32	4734.29	4957.7	5167.07	5521.36	4870.71	5816.55	4316.69	4890.97	5623.17	5883.76	3024.39	3581.86	4532	3810.58	5189.67	4636.42	4540.87	4754.61	4823.34	4919.91	4910.7	4701.32	5386.56	5050.18
Mbip	NA	685.712	575.542	366.433	778.529	742.829	NA	727.608	867.626	555.921	NA	720.495	NA	1071.93	927.754	1319.08	1510.55	1138.28	899.851	1956.42	1055.91	NA	NA	1089.66	1026.09	NA	2008.72	NA	978.858	1381.66
Ddx20	2226.28	1947.52	2289.7	1861.89	1827.14	1777.12	2363.12	1842.23	1687.47	1858.8	1287.71	1946.67	2007.65	1381.52	1680.15	1414.01	2262.43	2059.02	2625.1	2349.02	2063.54	1623.53	1710.38	2499.6	1513.6	2104.09	1709.83	2189.35	1623.9	2297.36
Uap1l1	14977.7	14282	13407.3	13551.2	19930.5	18883.9	12807.1	12719.6	17865.1	17306	11936.3	14328.1	18865.1	19827.4	10261	8849.77	11154.3	10580.4	10430.1	9733.82	11267.4	11685.9	9605.12	12356.2	9303.57	9265.06	8452.15	7297.06	10771.3	11906.5
Sltm	8907.69	9529.35	8594.32	8610.36	8357.39	7750.47	8122.08	10494	8730.46	8683.12	8682.82	10000.3	7750.7	8441.11	7402.9	6388.42	8344.25	12590.3	8912.23	9445.3	9193.77	9380.83	8533.1	9106.82	10054.9	10241.6	11674.5	12647.1	9024.56	9521.88
Lrrc47	18172.8	19070.4	19234.1	21297	16328.2	19863.4	17068.3	19509.1	17699.9	18658	17999.4	19051.8	18551.4	18009.9	18151.7	16516.8	14476.1	15646.3	17339.1	18042.6	18730.9	18450.3	15475.4	17861.3	19973.7	17159	16974.7	16881.1	17523.3	16855
Ncoa2	1653.77	814.16	723.608	1244.29	800.776	989.188	1171.95	1427.09	1299.34	713.578	911.37	1254.98	1579.15	886.355	839.92	677.781	1271.21	1176.77	NA	359.58	1088.43	761.684	940.327	1293.4	1114.34	1118.64	1200.24	1552.89	1152.65	1369.31
Pdcd2	1767.22	2163.5	1384.73	2223.56	1574.9	2096.7	1706.06	2002.24	1591.77	1757.95	1932.61	2011.95	1960.66	1533.03	1470.2	1962.25	1842.88	1992.85	2070.85	2303.42	1982.68	1463.49	1248.51	1216	1597.36	2394.25	1778.94	2235.88	955.894	1544.56
Eps15	4918.97	5148.91	6162.17	5141.81	5484.06	6434.04	5180.39	4880.99	5782.08	5476.14	5007.77	4561.98	5964.71	5380.29	5402.35	4049.17	6310.41	6804.81	5019.36	4710.46	4367.14	4535.92	5802.3	6309.33	5188.82	5331.79	4981.06	4918	6219.03	6907.22
Mrps7	2702.57	1927.29	2363.19	3264.83	2831.13	2497.19	3097.5	2987.28	2870.7	2378.13	3632.92	1475.11	2924.79	3051.79	2358.55	2184.03	1474.32	1982.2	1654.73	2095.09	2503.8	2265.89	1719.08	2197.01	1585.86	1625.74	1579.75	1474.14	2774.34	1557.6
Vps52	5047.69	4630.55	5751.36	4426.36	5490.96	4395.52	6097.49	5932.8	5541.16	5098	6426.03	5421.6	5423	3815.83	4586.32	4138.87	5605.84	5996.83	5424.16	5325.59	6211.44	4900.55	4949.18	5001.25	6917.28	6577.34	7192.09	6518.48	6394.47	5502.43
Cry2	NA	600.377	421.526	563.239	426.112	85.8959	726.632	481.85	260.352	NA	662.95	740.133	805.181	610.127	513.92	761.054	289.961	572.597	NA	NA	627.256	687.897	NA	NA	NA	NA	740.916	476.984	NA	NA
Psmd11	47093.6	44683.1	44178.3	43115.7	41090.1	40098.7	42196.1	40489.8	42516.9	41960.9	41397.7	43601.4	43283.5	40429	40573.3	39610.1	39685.5	41916.2	43741.7	44547.8	46905.8	45367.5	43526.4	41895.1	49376	47815.9	40443.2	39780.8	46053	45966.5
Thoc2	8984.08	9649.16	8774.54	9170.82	7519.42	8667.47	9645.89	10491.9	8294.5	9535.06	9513.2	10292.3	9043.25	8681.41	8934.43	9379.76	7787.96	8943.94	8671.49	6789.02	9355.45	9343.8	6645.67	7865.57	10716.3	10492.7	8000.4	8526.1	7802.34	8388.68
Sacm1l	19183.9	19903.7	18291	17943	19136.8	17261.8	19409.9	18312.1	18769.1	18503.3	19479.5	16446.3	19338.5	19205.9	24329.2	21012.1	16776.2	17536.5	16416.1	14862.5	20231.7	19628.8	16860.1	16406.8	18575.3	17348.6	19066.1	18355.6	16857.5	19636.4
Psmg4	471.994	646.185	511.954	362.134	267.433	656.963	288.426	775.941	840.359	499.312	225.286	417.694	1098.92	542.194	NA	141.313	518.309	240.906	209.037	616.893	268.371	404.229	557.472	315.989	442.657	115.977	442.608	234.88	743.11	413.606
Ttn	4831.68	3316.92	5073.12	5355.74	2637.85	NA	2147.43	2383.29	11968.2	11861.6	18668.7	19260.4	12313.6	12492.2	11485.9	10720.9	16356	16015.4	13869.1	13645.7	151639	152992	NA	NA	4906.86	5046.47	NA	2995.7	3933.22	NA
Mical1	15149.5	12966.5	13538.5	13564.6	17102.7	15287.7	14780.9	15428.6	14490.2	13888.6	11022	12186	16177.6	16222.1	8934.03	8274.49	12699.2	12108.5	8593.47	9860.94	10853.1	8871.05	11557.3	11629.1	10073.1	10688.1	11945.1	9906.91	10102.7	9260.13
Zfpl1	4860.09	4478.67	4986.2	4963.24	5791.19	5328.36	5535.35	2371.44	5024.24	4115.38	7464.49	4233.81	4210.31	4884.73	3365.65	3318.96	3511.81	3220.28	3129.84	3585.2	6831.19	5302.45	2815.79	4715.92	5083.94	3836.94	3664.49	4122.31	2842.26	4592.85
Elp4	1322.1	1145.88	2133.7	2041.57	1244.52	1908.97	1494.3	1957.57	1554.54	1471.61	1449.05	1660.82	1436.83	1366.01	1039.71	1394.82	1714.17	1268.68	1539.42	1252.12	1574.81	1204.45	1736.02	1705.61	1526.05	1306.81	1396.04	1574.67	1209.63	1499.32
Edc4	10758	12259	12230.2	11228	10955.1	10973.1	11435	10835	11731.8	10721.6	9399.09	9882.09	9629.9	10546.9	8382.68	7283.44	8609.61	9163.26	9022.38	10115.3	9300.26	9100.21	11592.3	10660.4	10217.2	9740.39	9986.7	10293.5	10441.4	11600.3
Inppl1	NA	704.293	NA	663.184	656.909	550.834	679.986	687.739	936.301	719.801	542.882	570.908	1085.81	672.176	NA	1354.9	975.749	809.527	NA	595.975	1091.03	756.35	864.623	622.642	NA	NA	606.795	NA	NA	NA
Cdc27	944.136	1602.09	1562.96	1004.41	888.521	1299.71	1185.74	1147.53	1161.36	1078.16	1388.6	1056	1193.1	887.032	947.889	959.383	1798.91	1122.26	1452.17	1296.7	1307.85	792.727	1046.34	1282.85	1676.02	1088.71	1163.26	1239.07	1186.4	592.196
U2surp	12057.2	12909.5	11697.4	13206.3	10624.8	11043.1	11473.1	11085.5	13247.6	13339.5	12005.2	15814	12731.2	10611.4	12318.2	13352.9	9182.19	11349.7	8514.71	10826.8	12631.2	10162.2	8137.1	10159.5	10722.8	9510.87	10948.1	10975.1	9526.91	11210.7
Septin6	2630.61	2013.5	1832.31	2174.06	1580.4	2205.42	1619.98	2156.12	2500.57	2157.61	1558.21	2192.83	2358.01	2340.07	954.771	1076.94	2621.94	2503.35	807.908	2211.25	3621.75	1274	2526.53	2285.78	2478.52	2410.4	2009.96	3604	1546.53	1981.58
Krt75	10546.2	11250.1	16169.8	17687.4	9270.69	11545.2	18761.7	18602.3	22134.9	23529.1	11139	10466.8	8949.9	9081.37	10159.2	8655.02	18997.3	19942.8	13619.9	11266.1	15191.4	17294.5	17558.1	16668.3	28250.4	27790.1	26693.2	24456.4	17317.7	17395.1
Nckipsd	1740.99	1386.71	1634.74	1533.05	1552.21	1327.05	1255.23	1277.11	1350.92	1433.33	1182.46	1319.78	1060.89	1350.28	1055.69	1863.96	1698.49	1195.18	1082.89	944.288	1223.62	1692.24	836.504	1384.49	1112.89	872.163	1307.01	1255.2	1384.29	1449.22
Fh	39869.3	42731.5	41487.1	46240.1	45843.5	46686.4	43636.3	44150.8	43718.2	45215.7	40444.8	43407.8	43327.8	46656.5	34241.6	38228.1	50413.9	50375.4	49751.9	45023.7	55863.1	60281.1	40702.8	46437.3	43363.4	38908	43373.2	43073	51167.6	48160.1
Tln1	32124.8	33187.3	34012.8	33189.2	41576.2	41746.9	29173.1	29517.3	38657.4	39287	26671.1	29672.8	35017.4	34854.2	22211.6	22116.6	31828.4	32676.9	30740.2	32570.2	24814.5	25473.9	34447.1	37907.7	23428.5	23765.3	27654	27189.5	34302.2	34066.9
Tomm70	13947.7	13610.1	13888.2	13086.9	13204.9	12844.6	15164.3	14969.7	14391.6	14573.8	15606	16382.2	13676.8	15878.3	19827.4	17267.5	12142.9	13215.3	13061.2	13055	13793.6	13738.7	11267.5	15338.6	14540.7	15719.2	11198	10306.8	14444.5	15091.2
Arid1b	3259.85	2879.9	3324.08	2988.24	3571.51	3062.4	3113.99	2975.83	3419.09	3281.84	2335.22	2611.46	2740.82	2501.93	2195.32	2007.36	2725.9	2328.39	2731.78	2191.42	2175.55	2237.75	2286.83	2854.72	2889.98	2997.31	2539.02	2436.5	2744.48	2847.84
Pigs	5675.48	6012.75	5321.89	6334.2	6768.23	6979.8	5467.73	6120.6	6475.38	7017.77	7756.78	6378.9	6039.33	6382.59	7360.67	7979.32	4879.7	5320.97	6467.35	4801.51	6300.89	4752.3	5173.5	4379.57	6079	4562.11	4431.45	4411.48	4581.96	5430.47
Efhd1	970.343	1106.15	830.513	1136.64	1256.54	2244.27	1673.17	1908.79	1146.68	1995.75	1016.76	1153.14	1784.93	1539.22	706.529	950.893	922.019	1065.98	1681.13	719.84	954.594	744.543	1506.11	1357.38	683.541	1143.75	1083.59	1443.83	925.278	1582.36
Rab21	25913.1	25096.7	23471.1	29244.5	25700.6	26414.2	21659.1	26225.3	25860.3	26577.8	20624.7	25012.7	20674.2	27776.1	20818.3	22274.1	25454.8	28450	26163	27980.5	27459.8	29584.1	24499.2	26282.6	25516.8	23790.9	25121	28284.8	25969.7	28280.7
Unc45a	23700.9	23399.9	21840.2	25055.9	19503.9	20210.7	19038.6	20397.6	19272.8	20653.5	19604.8	21129.4	20819.5	19416.9	21119.7	17833.1	18374.7	21924	19896.6	20007.2	22810	19576.6	19862.1	18780.5	22171.8	19874	23021.2	23211.3	23745	23292.7
Dnttip1	2636.59	2650.48	2635.35	3135.86	3420.18	2387.31	3194.39	2979.5	2469.68	2996.06	2686.58	2662.04	2485.9	2680.12	2809.66	2609.31	2130.32	1833.67	1650.35	3200.94	2820.02	2402.28	1874.85	2310.41	3034.2	2313.58	2399.2	2641.21	2871.78	2815.42
Snapin	489.852	247.51	787.162	186.814	696.215	255.127	557.763	208.251	576.256	509.724	295.07	208.39	466.133	388.716	728.415	899.344	255.552	444.106	NA	NA	688.983	145.106	519.267	533.353	77.7013	NA	NA	NA	472.473	536.545
Postn	174168	184062	163472	172761	174488	184336	198547	217253	213781	223763	163474	165411	160480	166551	27528.5	28400.1	56367.9	66794.1	58208.5	61924.1	63941.5	59729.9	185979	193659	93776.4	91204.1	103356	100421	98312.3	106242
Aebp2	956.385	693.273	677.005	1270.79	575.887	560.05	1254.01	882.813	775.197	693.151	732.406	1069.61	845.24	649.999	581.986	389.928	889.848	808.934	1127.25	848.47	1075.97	492.034	809.348	973.096	966.343	1458.27	1322.53	720.307	723.604	687.452
Aoc3	12300.5	11318.1	14107.3	15265.6	17812.4	17820.1	18483.4	17234.4	22809.1	22904.5	18019.1	18371.4	26158	27574.4	20589.7	17970.2	28073.3	29617.8	14071.9	15980	23478.2	24490.1	25102.3	23609.7	15171.1	14170.4	31588.7	28318.6	28204.3	25650.7
Ckap5	16566.6	16640.9	17554.2	16850.6	15318.6	15368.2	16629.7	15988.7	14685.1	15445.9	14911.7	15480.9	14584.4	13988.1	13093.7	10822.6	12951.8	13364.4	14257.3	14485.5	13463.7	14247.3	15624.3	15278.7	15671.9	15451.5	16737.8	16941.5	16389.3	16773.6
Stip1	72568.6	68867.9	66905.8	71892.9	67474.1	70228.7	63875.4	67369.3	67764.3	68774.8	69063.4	70104.1	64005.6	65542.8	58575.9	60988.5	55767.8	64005	55053.3	57663.6	66060	69682.1	63627.5	68197.9	61101.4	58941.1	45094.6	47017.3	65135.1	68862.5
Ank3	37986.4	37710.9	38936.6	39114.1	35184.4	37395.3	34643.8	35727.5	35288.4	37754.9	32824.9	35160.9	34407.8	40159.6	29418.2	28062.2	37932.7	40452.6	36937.1	34342.8	35218	36371.4	37557.3	40721.5	38478.9	34104.5	36570.8	34273.5	31833.3	37427.6
Efnb1	2246.64	1380.46	1588.98	2124.64	1410.55	1544.02	2055.18	1921.17	1170.46	1702.53	1953	2192.66	1781.36	1430.16	1688.26	1821.95	1741.57	1888.57	1640.24	1770	1282.45	1257.51	2504.29	1174.35	2003.86	2569.51	1586.75	1927.14	1293.15	1857.15
Ctnnd1	63527.3	54670	56627.5	55831.1	51072.2	48792.5	55306.4	54488	59564.1	54599.4	60222	50257.6	53959.4	46416.3	46382.3	37089.3	55903.4	54957.4	57694	54497.7	53654.4	45835.4	61755.1	52044.1	62273.6	64533.4	58998.8	56891.7	58322.1	59727.9
Rbx1	25782.9	22592.2	28553.2	28397.3	24882.3	27224.1	31994	32911	26052.7	31258.9	15055.9	22865.4	30249.2	26883.8	16341.6	19777.7	31201.9	30242.4	36861	34166.6	31330.1	27227.6	39622.8	45084.1	49379.9	46726.1	31580.9	34270.5	37858.6	34532.2
Chchd3	23420.1	25480.2	23333.7	27058	25836.3	22141.8	25164.1	25138.8	21746.2	25084.5	22878.7	21190.7	26192	24945.9	22781.8	17521	24486.5	28737.2	23044.7	24689.3	34776.4	31758.3	28689.6	23343.3	23836.2	25947.5	18929.1	25632.9	20871.1	24385.9
Eef1g	208964	235838	170978	257291	197337	199239	190401	225445	194738	203336	195718	198099	176155	199479	183333	190942	236988	216809	248086	279038	226394	281228	242348	223547	201869	203122	226887	266996	236301	227760
Rabep2	13249.5	14442.7	13088.4	12804.3	13643.2	12935.6	12881.4	13927.8	13137.5	14103.5	13062.4	10903.7	12657.1	12519.6	5729.47	5411.3	7944.82	7423.59	9797.45	9645.9	7409.16	8319.99	13255.1	12257.6	10618	8674.59	7929.83	8050.8	12971.5	12264.4
Polr1c	6082.39	6102.5	7214.35	7880.02	6204.66	5341.65	6619.49	6649.98	6495.57	5317.86	6502.47	7689.42	4847.97	5604.57	8590.1	6942.37	7075.34	7105.02	5910.69	7067.34	6647.11	6531.36	5652.58	6712.59	6608.15	8568.33	8494.32	6489.04	6149.22	7719.33
Copb1	39332.7	39858.8	39182.6	41187.5	41751.6	42220.9	37119.6	38879.7	40605.8	40587.1	29302.9	31129	35052.5	35836.6	23116.1	24035.6	29507.8	32994.5	31571.1	33061.5	29539.1	30061.7	30079.4	29687.9	30963.8	29029.5	32701.7	35283.9	29245.6	32896.4
Nol7	2627.93	3259.28	5701.92	4063.09	3140.59	3509.45	4089.5	4182.62	4273.22	3321.63	5221.13	3937.63	3444.61	3830.96	1770.41	1819.76	5543.25	5570.59	4827.22	2358.74	3742.6	4035.87	3456.49	3699.54	4327.4	4042.85	7082.98	3206.95	4628.15	4582.91
Golga2	10385.7	9646.37	10092.5	11174.8	9277	9803.57	8722.9	9068.67	8808.97	10025.9	9961.61	9464.24	9257.69	9120.55	6363.37	5611.58	7944.26	7266	8059.67	8119.55	8083.76	7345.48	8307.05	7913.78	8958.6	8278.54	6168	5779.6	8788.43	9483.18
Septin11	16380.6	14874.4	20131.5	18275	23907	22281.3	19423.9	18685.4	25885.4	23664.2	18343.8	17251.3	21806.1	21750.9	14850.7	11015.1	22024.8	21037.6	12373.1	15915.6	18394.4	18218.8	20905.1	20741.6	20463.3	20697.7	23450.7	22483.4	14799.4	15982.9
Pnp	65403.7	59703.9	70853.4	65556.5	76595	76930.1	66433	64463.4	67185.9	66350.3	65346.2	65526.7	81645.6	74642.5	61720.6	58355	71103.7	67305.8	77195.6	88826.1	77351.3	76217.3	66464.1	64897.1	61996.1	66135.2	83692.5	74816	84448.5	81546.4
Pkp4	1652.62	1234.89	1268.36	1249.97	1081.97	1213.29	1027.35	1075.97	1484.71	1017.71	1266.5	1538.48	1322.48	1351.03	1371.83	1511.69	1711.5	1422.75	1702.42	1263.74	1176.44	866.525	1566.14	1203.18	1571.88	1551.69	1588.81	1099.11	1417.35	1297.79
Ttc4	1662.46	2488.63	2006.9	2250.25	1996.21	2364.15	2094.07	2926.65	2599.98	2326.25	2254.09	2578.77	1699.77	2799.3	1903.31	2238.17	2504.95	1661.03	2047.22	2194.29	2325.49	2500.81	1627.16	2494.29	1748.36	2563.01	1886.83	1686.91	2125.44	2216.48
Yju2	327.549	489.868	393.544	733.333	265.619	398.702	761.832	494.525	457.162	411.344	315.142	705.689	560.962	533.435	517.771	568.603	450.518	532.943	442.592	221.304	517.835	645.715	247.13	650.383	419.776	372.054	302.875	519.546	578.714	803.884
Rab3gap2	5471.02	4966.66	5815.34	4472.5	4768.47	5215.06	5473.24	5498.01	4858.82	4688.54	4748.81	4969.42	5221.31	4889.19	4885.57	4716.79	4770.54	4773.57	5792.92	3774.99	5533.57	5782.06	4553.65	4930.09	5058.18	4845.51	6107.94	5703.86	5446.23	5761.42
Alkbh5	1596.76	1730.11	1834.35	1967.48	1861.29	1659.68	2437.1	2939.3	2742.46	1855.4	2250.97	2594.46	2142.57	2309.38	3808.49	3212.81	1707.94	1696.15	1049.33	2238.81	1771.92	2439.56	2278.08	1550.79	2593.8	1771.81	2374.93	1521.28	2653.14	2162.65
Camsap3	7820.47	8434.94	8749.88	9599.22	6804.71	7786.37	8648.13	8903.07	7324.81	8678.63	8460.78	8767.63	7639.5	7182.74	8800.39	8703.57	6840.54	5509.63	6992.76	6672.33	6274.06	7270.61	4907.14	6596.3	7809.58	7031.79	7725.97	7798.2	7717.08	8442.16
Ctdp1	2858.5	3769.18	3793.12	3602.19	3013.08	3601.22	3566.76	4086.36	3767.13	3127.53	2813.23	3087.87	3715.29	3486.2	2172.57	2201.07	3760.89	3785.24	3187.66	2829.45	2670.76	2799.48	3172.62	3699.76	4086.84	3620.16	4068.25	3764.89	2996.08	4152.47
Traf2	255.725	NA	NA	293.566	644.192	NA	718.264	369.066	711.987	NA	312.575	NA	582.547	366.197	682.107	NA	NA	NA	NA	NA	594.895	NA	812.521	NA	NA	955.171	564.872	NA	NA	NA
Lemd3	5159.95	4564.48	4443.84	4571.92	3931.46	4200.55	4411.34	4392.87	3893.02	4233.74	4081.35	3996.66	3363.91	4492.76	3781.53	4170.33	4089.87	3786.56	3675.47	3746.78	3838.72	3963.31	3797.03	4523.89	4765.66	4587.04	4835.42	3917.93	4484.37	3551.54
Acox1	15353.1	12407.8	15397.8	16900.8	14428.4	12752.7	17686.2	17430.3	16057	14993.1	15808	15803.4	17586.1	14312.1	12346.4	10592.2	14124.3	12999.8	11446.2	14066.4	14850.3	15289.2	17088.5	13708.7	16832.5	15090.2	17511.2	20037	18070.6	19898.4
Irf2bp2	6235.24	5071.58	4154.28	4986.76	5054.74	4721.88	5460.22	4618.13	4731.42	5210.12	4460.85	3664.03	3182.58	3996.21	2862.26	2655.55	2871.57	3363.21	5014.98	3304.35	3206.72	3257.95	4051.52	4522.86	4771.79	4667.25	3674.56	1593.47	3832.67	6088.41
Slc4a1	4412.57	5019.3	6805.96	6857.98	13560.2	12659.5	4361.84	3384.44	6355.85	6227.02	12907.6	14623.1	9020.72	8840.16	7105.17	4648.96	2531.86	3016.57	1880.15	1481.12	4196.92	4778.64	8635.78	7940.77	10094.6	9884.75	11092.8	10867.9	14793.2	14660.5
Nisch	5481.51	5562.62	7080.36	6198.05	5590.51	7416.49	5886.23	5985.42	6497.85	6182.79	6341.28	6531.02	6014.32	6927.43	7000.42	7335.6	5964.75	5395.99	4860.3	6220.46	5176.15	6292.99	4116.98	4807.35	6237.35	5174.4	5674.57	5984.33	6294.33	6447.7
Pgm2	22682.1	21118.6	21354.3	21551.2	25601.5	25340.3	22150.1	21548.4	25005.2	23497.5	19020.6	18878.2	27041.4	26869.2	13171.6	13751.1	23410	23157.6	19213.1	17920.8	20048.5	20261.6	21915.2	23459.1	19496.5	19573.1	25710.3	24415.6	25888.8	23091.4
Snd1	41660.2	42296.7	45767.9	45604.2	43560	42351.7	45573.7	42450	43263.1	41390.6	34902.7	34434.3	40173.4	37225.7	28525.2	31959.3	44912.8	44480.4	44237.8	41691.1	41795.6	42785	39448.8	36004.7	39034.8	41528.3	42278.2	42310.5	36050.3	36579.8
Tomm22	21968.3	18595.8	22065.5	24706.9	17990.7	18633.9	19334.7	25589.3	19629.9	22394.3	24255.6	21085.3	25099.3	19607.4	17171.5	17869.3	13188	20649.9	14985.6	19453.4	23235.3	18001.9	23626.1	24450.9	26008.4	22048.8	12949.1	15857.1	21449.7	26558.7
Lrch4	720.419	840.628	740.43	718.375	919.397	852.859	674.198	489.907	1001.82	1130.39	591.794	814.57	296.501	445.538	604.738	566.254	1093.11	995.696	344.311	592.873	767.866	1094.1	770.994	1621.09	641.917	622.879	627.32	1141.76	825.024	1124.66
Rab3gap1	5703.19	4890.75	5415.32	5560.38	5643.42	5608.85	5385.08	5782.75	4968.01	4784.23	4934.87	5225.37	4967.19	5386.53	4360.26	4015.78	5693.27	5843.53	4585.46	5271.07	5239.38	6280.52	5135.7	6116.12	4868.09	5742.89	6084.65	6746.26	5183.94	5188.03
Vcpkmt	154.386	188.94	NA	462.765	56.7771	NA	606.785	192.375	NA	167.608	281.923	277.058	188.63	29.7169	226.133	381.378	NA	NA	NA	NA	545.499	NA	282.196	NA	1116.2	NA	NA	NA	721.837	NA
Sfxn2	2636.81	3238.7	2614.93	2969.55	3275.2	2997.86	3219.89	3845.58	3131.07	2944.27	2369.8	2942.73	3181.56	3014.59	3598.08	2372.22	3380.89	3167.93	1566.16	1702.54	2947.57	2837.2	2136.66	1869.94	2892.21	2344.14	3327.33	3048.73	3407.01	2472.91
Pelp1	6686.79	6548.29	7271.08	6531.09	7582.77	7430.23	6194.89	5883.51	7475.11	7037.56	6345.94	7250.94	5554.97	6016.06	6768.51	6851.69	2834.27	5032.65	6608.03	4997.02	4251.13	4492.4	5317.02	5556.65	5161.4	4644.33	4668.29	4619.3	5638.02	6241.26
Ints1	9312.95	8238.7	9274.96	9593.65	8567.83	8741.73	9613.84	9735.48	9750.74	9911.83	9976.52	9700.7	8975.55	9344.72	8638.36	8869.83	7471.27	7792.76	8299.36	8555.69	8388.17	7647.37	7621.76	8531.56	9320.66	9185.59	8552.86	9310.43	9376.47	9127.32
Copg2	23319.4	25148.9	23704.7	25457.5	22010.2	23254.5	25464.7	24783.5	23877	23639.6	20789.5	22830.3	23219.2	22394.3	27260	24881.8	22632.6	22609.6	24581.1	24842.8	27036.9	23290.7	23883.7	25442.9	28517.7	28056	25950.4	28376.4	26270.3	25491.9
Psmd9	20994.2	19018.9	21751	20925.2	23225	23571.8	23106.2	18603.7	23188	25072.8	23438.1	20048.4	27400.8	22991.8	13828.2	14131.8	21635.4	19214.8	19180.3	17999.9	24434.9	20160.6	23934.2	18652.8	18665.5	19389.4	15985.9	17368.5	20728.9	21001.8
Fmnl2;Fmnl3	2405.89	3138.45	3155.51	2946.24	3847.94	3046.13	4116.85	3336.43	3481.05	3178.38	3509.8	3909.56	3030.94	2778.41	4026.42	3342.07	2055.07	2116.8	2098.33	2222.12	1783.82	2217.41	1714.78	2092.86	3288.58	3462.44	2578.03	1972.11	1332.59	1795.31
Plin2	15488.3	17305.8	22975.6	21678.6	21181.1	21644.6	15287.9	17030	15463.2	16881.2	11448.8	14287.6	9371.92	8506.94	10539.7	11237.3	16028.7	12830.6	13756.8	14809.3	12257	11363.7	6315.83	4740.06	10381.9	9642.34	7550.96	9328.2	9534.9	8294.83
Nle1	3461.4	2596.2	2917.34	3305.27	2915.63	2835.74	3690.94	4120.83	2494.23	3013.37	2422.36	3451.4	3057.25	3176.6	2971.41	3613.59	2664.78	3260.49	2479.07	2818.82	4106.56	3510.1	2788.82	2175.37	3513.31	2902.43	2244.14	3089.22	2992.42	2678.25
Usp34	815.928	908.64	1142.48	972.251	1068.48	968.553	910.777	1082.93	993.017	1218.91	1096.73	1289.97	799.471	894.003	949.827	1194.56	784.864	1150.85	406.739	1248.82	877.986	717.981	1014.39	990.842	1309.6	992.485	909.127	1291	913.603	1179.87
Hdlbp	44544.3	45000.4	40455.3	45919.8	43633.8	47742.1	37893.3	40945.1	40258.8	42349.1	29502.9	33756.9	36333.7	36813	23126.1	23375	33656.1	38227.8	36248.3	36068.6	32109.4	30939.5	32299.1	31134.1	28863.5	27954.6	33576.6	36699.2	31036.9	34109.5
Lcp1	50292.2	49284.4	51660.8	48870.5	72047.9	67730	51463.4	51059.3	64014.8	59719.9	52176.8	50841.3	62328.6	62694.4	30699.6	24371.7	65334.8	56875.8	63017.9	60976.5	66328.5	67840.8	97561.6	97802	57494.3	59958.8	50805.2	45587.5	62207.7	56355.4
Glod4	35573.7	38626.5	41492	39185.6	43018.2	39448.3	39735.2	37519	39634.9	37493.8	36478.7	36572.4	38603.9	41367.7	37867.2	33382.8	44671	46027.8	40121.6	42396.8	41757.4	45621.9	45226.1	46916.2	41674.5	40057.9	48369.7	42117.3	48083.8	43368.5
Dip2b	7510.74	6972.55	8122.24	8223.87	7535.23	6965.87	7415.7	8262.02	7381.26	6719.4	6992.03	7501.95	6835.8	6926.64	7799.16	7497.49	7135.69	7363.51	7497.85	6659.69	7779.56	8009.49	7053.41	7792.73	9174.38	8716.16	8845.23	9319.91	9081.19	9056.53
Micu1	4052.42	3047.1	3671.08	2772.05	3040.76	3650.37	3360.94	3288.27	3655.67	2886.92	3215.29	3921.48	3193.45	3088.34	4060.16	3795.4	4245.04	4202.92	2853.34	2426.9	3904.57	4870.62	2925.95	3223.62	3253.86	3453.29	3855.69	3335.45	3321.69	3918.78
Tpm3	103895	102296	125078	120579	109188	118541	95489.4	91842.8	99787.5	105617	107376	97894.3	129890	99404.3	59080	55366.7	174286	182737	139482	134870	156495	122406	227255	185385	129477	140466	128314	131728	126132	155758
Trim65	404.857	349.223	376.226	275.85	428.202	376.081	517.824	319.856	688.804	367.027	399.862	464.649	381.294	534.845	351.412	359.79	371.521	333.273	NA	NA	417.59	428.487	589.596	600.874	666.892	766.012	559.393	299.478	525.461	333.965
Fut11	1657.5	1746.63	1614.23	1131.55	852.502	1526.19	1579.91	1402.58	1879.51	1367.67	1481.77	1199.11	1416.65	1695.45	1056.73	1079.72	NA	1416.26	NA	NA	1414.18	1263.57	1388.03	843.611	1162.83	700.834	293.489	832.332	613.623	903.15
Pacsin2	14276	10617	15514	13226.1	16645.9	16278.7	13698.2	11779.8	18004.1	15190.7	14985.4	13427.3	15726.4	16497.5	8974.03	10024.5	18672.8	16176	11399.1	8989.04	15221.3	12457.4	17456.9	19088.2	13307	12717.7	13371.6	12630.2	15645.7	13940.6
Stim1	21579.8	18699.5	20616.6	20181.8	17486.6	17499.4	20460.4	20938.5	20110.9	19524.7	22729.6	19497.3	20493.9	19254.6	24812.4	19984.6	20856.1	18881	19760.4	17130.5	24109.5	21547	19285.1	18421.3	23018.6	21074.5	18010	16924	21450.1	19897.1
Cse1l	19162.8	20414.4	20605.5	20520	21087.3	20521.5	20672.8	21539.8	20126.5	20281.5	19462.5	18775.9	20950	19999.8	18862.5	18600.8	16605.8	21260.6	21376.1	19885.3	20916.5	18460.6	20330.6	20509.1	22080.1	22416.5	19092	17688.8	21370.9	21910.7
Rabl6	5765.13	5664.23	5065.28	5788.18	5341.5	5271.87	6162.41	6339	5132.85	6077.09	5801.8	5596.37	5948.53	5832.35	3892.34	3842.01	5849.21	6371.89	5271.05	4412.97	5106.48	5282.64	5811.79	6012.53	5639.79	5899.68	5878.65	5726.4	4573.87	5580.09
Arid4a	436.934	169.395	1070.55	417.838	656.229	424.753	696.129	461.396	490.541	185.852	315.974	343.951	203.137	365.902	NA	NA	702.023	629.975	NA	NA	149.236	383.763	515.417	NA	510.518	611.434	NA	624.676	NA	506.214
Mypn	NA	NA	NA	NA	NA	NA	NA	NA	762.429	NA	768.182	908.457	NA	1080.32	NA	158.107	NA	NA	NA	NA	2939.56	2544.97	NA	NA	NA	NA	NA	NA	NA	NA
Vdac3	78688.3	79929.9	76531.4	72907.7	76699	73009.9	75374.8	79506.6	89029.6	90206.6	81533.4	77616.5	82786.3	81439.8	73763.1	76464.6	68982.9	62156.2	63435.6	71117	111675	97350.5	62930.9	77889.3	76452	82206	81636.8	85886.2	77068.9	76109.3
Cd207	4954.19	4021.83	4078.12	4407.27	5108.38	4767.9	8479.95	7776.58	6837.55	6583.52	7526.23	7352.56	7611.41	7393.01	1998.46	1761.65	2128.64	2746.49	1325.93	2289.77	2740.6	2692.34	5009.5	5362.42	9232.17	8159.51	7423.89	7774.76	6934.27	6927.3
Stat5b	1764.51	1997.77	1627.92	1977.29	1762.17	1866.37	1254.13	1782	1408.33	1833.44	1556.69	1960.55	1767.02	1661.07	1320.98	999.286	1105.01	1551.56	2071.15	1865.83	1523.37	2157.33	1352.65	1517.61	860.788	715.399	1564.77	1701.04	953.639	1601.81
Eif2b5	10343.8	11238.5	9945.85	11904.1	12150.8	10137.5	10388.5	12447.7	11465.9	11386.7	13626.2	12189	9235.62	12731	14797.7	16543.2	7913.06	9635.88	12117.2	10531.3	11982.7	13796.8	5296.68	7163.24	9770.03	11642.2	11233.1	12204.4	11507.6	13464.8
Prpf3	8582.89	10286.7	10283.9	10210.5	9900.84	9706.19	10369	10925.3	9814.89	10109.7	8438.03	9729.83	8242.15	9980.99	7062.75	7829.04	9082.57	10506.9	7832.16	10237.5	8191.42	8624.79	9054.18	10044.6	10534.5	9297.81	10982.6	10553.4	9116.38	8878.06
Ebf1;Ebf2	863.118	719.803	474.091	1058.85	1413.36	1143.76	682.684	864.494	1779.01	1003.13	1265.66	1049.63	1533.35	1292.21	NA	453.099	863.49	1061.94	NA	538.589	1046.3	1163.26	1449.25	784.591	710.153	398.671	1188.49	883.806	732.692	647.091
Cand1	47707.5	47408.8	45194.2	47616.7	47565.7	48337.6	45824.7	48278.5	46019	50742.9	43153.2	48195.1	49204.7	46251.4	43428.3	47314.2	42368.5	45003.8	48352.7	49970.3	41714.4	44095	46310.3	49236.4	49729.8	48801	44981.7	46499.8	48709.3	53725
Son	20014.2	17192.3	19458.7	18752.1	16568.4	16580.5	19182.8	17923.7	18080.6	18166.4	18239.4	16890.1	16425.5	17470.7	15851.6	14576.7	15840.2	16774.7	16887.6	17334.3	15730.6	16073.6	18302	17713.9	20369.9	18995.8	17913.2	20600.3	16517.9	15916.4
Atp2c1	2090.99	1877.71	2137.2	2059.11	1418.71	2476.03	2875.22	2371.24	1844.19	2195.83	1714.56	2841.78	1558.18	1963.54	2041.81	2355.27	1816.92	1755.79	1389.53	1811.69	1466.95	2068.16	1707.61	3027.37	2175.83	2122.06	2151.91	2872.85	1551.91	2439.8
Sin3a	6059.31	5996.4	5818.75	5533.74	5261.81	5858.09	5975.86	6435.77	5947.77	5228.12	5306.8	5281.83	5469.19	5671.81	3900.79	4459.19	4600.79	5091.37	4671.38	4459.65	5271	4762.18	5829.82	4409.1	5533.29	5811.95	6002.96	5452.75	4976.91	5261.66
Tp53bp1	1802.65	2185.64	2421.57	1926.63	2427.72	2485.32	2170.62	2990.03	2619.04	2909.25	2187.3	2217.97	2439.34	2822.46	1221.05	1232.39	1520.83	2479.54	1862.11	2090.36	1774.85	2258.36	2769.46	2088.78	2032	2071.61	3176.82	3004.76	2152.68	2378.29
Pebp1	141025	157273	150665	149590	183001	174600	132936	131832	178938	171633	138802	116824	198398	199326	73905.2	68128.1	163200	144533	135201	143320	176791	166863	165837	166604	114550	100405	105586	115389	172454	173783
Alb	907621	1027180	948676	945123	1589740	1612250	1075800	1085900	1470220	1462080	1428710	1246110	1581170	1525850	709977	753209	1105510	1030180	1134990	1154730	842400	814630	2254830	2281380	1338470	1452340	1742360	1695940	1906780	1817050
Srpk2	3388.82	3202.61	4369.18	3988.22	3409	3161.16	3113.16	3844.64	3285.68	2533.96	2267.38	2765.32	2978.03	2363.76	3667.51	4007.98	3253.74	3064.43	2443.99	3649.41	3739.66	3792.61	2888.48	3200.23	2940.17	4749.27	3393.18	3629.56	3441.48	3464.82
Ap2a1	19016.4	18641.8	17626.8	19848	18194.1	19792.4	17252.9	19913.3	19744.7	18763.9	18055.5	18548.6	18708.7	18909.4	18632.4	18356.6	14475.8	16033.5	16347.6	17575.9	17395.8	15910.4	16379.3	17169.7	16792.8	16393.1	15989.5	18941.3	15234	18131.8
Bcat2	29185.9	25595.8	26768.9	30907.4	31804.1	31251.9	27271.3	29985.3	34928.3	32520.9	35115.7	31537	35106.9	30438.2	29742.3	33215.7	24943.2	23756	21534.4	22838.6	35043.2	31727.2	30774.9	18049	33508.7	31895.9	29294.9	28397.8	27586.8	27113.7
Sel1l	3984.74	4421.51	5009.05	3817.71	3884.14	4049.66	4496.32	3807.15	5519.69	4727.45	3381.46	3936.6	4481.71	4017.79	3534.12	2560.36	4647.41	4072.56	3576.8	3371.33	4973.41	4673.04	3533.3	3805.85	3905.12	3608.81	4311.73	3995.97	4874.5	4333.71
Aldh4a1	18439.9	19339.1	17238	20053.2	15602.6	17476.6	18715.4	18516.3	18017.4	19814.6	19230.8	18710.8	17120.5	19083.6	21160	19882.5	16258.7	17837.9	17495.8	19534.8	20632.3	21004.9	18252.5	17477.3	18690.7	20210.8	17070	16270.5	17216	18145.1
Ybx1	31969.1	28313.5	30000.4	23487.4	24516.1	20356.8	20730.4	21768.9	24739.2	24133	22389.6	24260	21051.5	14833.7	27034	29306	46995.3	56149.6	35403.5	43761.7	29782.1	30197.1	65084.4	44530.7	76116.9	88375	35279	30486.6	64239.1	40229.2
Rbbp6	1443.49	1064.57	1554.79	1616.79	1137.9	1401.51	1735.68	1655.57	1558.6	1289.59	1432.47	1342.97	1334.42	2040.64	1499.69	1212.88	2076.54	2287.12	1841.27	1740.39	1348.75	2212.08	1217.76	2167.48	1248.68	1661.42	1894.88	1851.86	1783.65	1752.14
Tpr	12888.2	13424.1	14391.5	12746.7	13091.6	12162.4	13550.9	13533.2	13917.9	13167.6	11904.7	11972	12796.9	12155.4	6767.55	7042.47	9644.48	10220.7	10866.5	11057	9946.13	9314.8	11819.5	10918.9	10526.4	9418.43	10402.9	9063.02	11280	10828.7
Entpd5	3451.66	3022.42	4035.8	4581.75	4867.87	4757.04	4499.91	3937.76	3695.2	4265.03	4196.05	3922.95	3877.34	4217.76	2441.39	2220.72	3516.15	4130.12	2099.33	3649.37	3725.87	3467.8	4178.39	3280.8	3909.51	3748.47	4422.85	4330.93	3712.26	3051.95
Gcn1	12212.9	12180	12021.5	12335.9	12012.4	12673	11522.5	11858.3	10749	11461.8	10024.9	10817.6	10938.6	10958.2	9886.64	9152.32	8976.91	9315.19	9898.5	10436.1	9821.68	10553.8	8788.38	8221.08	8904.6	8346.45	10001.3	10422.4	9190.13	9835.74
Map2k6	6477.87	4630.16	5763.15	5418.55	6738.74	5273.25	4859.62	5315.13	6587.94	6953.31	5701.74	3585.23	6506.75	7285.82	3970.9	3449.73	6997.42	7408.02	4275.57	3889.35	7876.84	7202.33	5508.83	4951.11	6812.86	6867.65	5082.85	5280.5	4627.2	4598.53
Pkm	831300	877255	860737	816807	774972	757580	734355	712373	792794	804110	726969	690901	892336	940930	562482	592203	1046250	1070810	1066610	1054490	1041900	1102460	1017020	1039740	764103	716102	954767	871991	936134	850123
Acbd6	3647.14	3204.96	3544.7	3316.18	3183.09	3117.98	3340.38	3275.49	2701.34	3242.83	2673.39	2511.1	3666.94	3043.32	1611.03	1992.46	3237.89	3974.79	2279.7	2739.99	3289.45	2374.84	2871.69	2657.44	2865.89	2956.7	1709.93	1988.75	3775.23	2826.47
Leng8	1633.83	922.876	1384.16	771.532	895.31	1087.18	1550.65	1154.06	1185.81	904.012	870.621	879.436	1159.15	1509.79	913.362	397.023	840.506	1191.29	962.176	479.396	996.871	1014.95	956.668	763.236	1430.57	1027.4	1148.91	1342.3	1233.84	1399.6
Prkra	5699.65	5410.64	5882.83	5407.98	6222.91	5416.86	6400.98	5990.8	5624.51	6132.39	5674.58	6061.74	5465.62	6756.6	3733.21	4047.8	4484.11	4574.96	4020.01	4000.18	5878.85	4576.94	5623.49	4500.42	5240.34	5635.64	6943.45	6002.21	4954.94	5172.98
Eps8	4005.74	3260.31	3689.88	4392.03	4707.08	4287.22	3087.95	2701.5	3249.37	3529.81	3496.7	3290.44	4033.92	3921.25	2056.51	2121.83	5863.44	5533.34	3722.53	4673.66	4515.9	4621.23	9934.19	8201.26	3594.81	4547.63	6355.18	5176.79	5396.49	5405.58
Map1b	4870.93	4659.68	5179.48	4337.54	4853.75	4490.35	4419.98	4249.31	4802.49	4382.11	4139.46	3547.38	5226.62	4613.56	2846.17	3086.35	7589.79	5669.88	4257.56	3956.45	4112.37	3854.15	3547.99	3769.51	3173.43	3689.77	4204.17	3819.35	3839.93	3835.21
Dhx9	37539	39246.7	39216.8	37609.6	35938.7	35171.6	39508.5	38219.9	37538.2	37146.3	33533.5	35078.2	34243.7	35602.7	32238.8	32684.1	33685.1	33248.3	36164.4	36345.3	37676.6	34711.4	32389.1	34325.9	34953.6	35354.4	37570.2	36714.5	35661.8	36494.9
Spg7	1328.56	1090.32	1074.11	1136.19	1070.23	1270.38	1220.58	1038.49	1321.4	1520.76	1474.64	1209.19	1076.86	1181.67	1037.72	1049.36	1114.59	1133.73	1492.51	1631.92	1031.55	1155.52	1656.86	1204.67	1270	1027.15	1014.65	802.244	960.5	1081.15
Nckap1	15842.2	14910.3	17124.1	15458.1	15822	14998.5	17759.2	17356.4	17060.1	16115.8	15969.6	16169	16324.8	15913.6	16470.5	14226.3	13913	12621	13053.8	13422.7	16357.4	15629.9	14516.5	13512.1	15733.6	14874.5	17558.7	18301.6	15329.2	16226.1
Wdr70	3143.44	2143.8	2634.64	2386.28	2017.71	2245.05	2829.75	2739.88	2593.27	2634.99	3016.92	2646.25	2608.15	2418.41	1580.84	2033.57	2582.72	2621.75	2373.65	2226.66	3046.39	2297.13	2471.26	2132.96	2908.6	2500.11	2720.45	2532.51	2172.9	2042.53
Prkcd	11353.4	12773.1	11641.4	12151.2	12005	11370.8	15852.3	15975.4	13639.9	13528.7	13975.4	15716.6	13744.5	14123.3	11162.4	11198.3	11547.1	11984.6	12116.2	11146.3	12880.9	12490.1	13526.1	15330.8	14050.8	15045.3	16463.2	16594	14122.2	15493.6
Tagln	23809.1	26759.7	32067.5	33134.8	39320.1	39959.7	20771.5	20272.5	30757.7	32647	26675.4	26184.1	48280.4	52548.5	79984.2	89575.6	89611.1	86153.1	68215.3	74437.9	37010.1	41425.8	59043.3	65911.5	24617.7	24420.2	27202.4	26570.9	75040.5	72507.4
Clasp1	6695.81	5652.84	5925.32	6489.89	5281.82	4948.55	5984.78	6119.17	5257	5419.18	5677.35	5332.67	5983.93	5941.82	4675.46	4968.95	5151.66	5555.66	5607.97	5160.67	5974.19	5588.15	5801.15	5665.5	6691.66	6746.91	6901.86	5836.84	5959.5	6091.95
Dnajc1	5956.95	4884.76	6119.58	5430.24	6851.71	6366.74	6049.54	5627.76	5771.93	5112.68	4785.88	4313.96	4648.04	4599.28	4752.58	3697.41	5472.94	3862.55	3892.49	4092.74	4540.56	4682.3	4522.32	4031.93	4211.92	4525.35	3995.92	4125.89	4480.2	3371.56
Aox4	23358.6	23930.2	22232.2	22891.2	23415.9	23317	9749.02	9408.26	10519	9255.87	7467.21	7006.44	7420.96	6849.62	12575.2	11402.6	10768.9	10155.4	23157.3	22530.5	20700.9	19357.6	4678.47	4213.05	4803.43	5977.27	7159.61	6993.14	8396.57	8312.55
Nxt2	155.922	289.327	111.094	437.283	189.075	255.998	NA	390.667	135.404	209.228	235.774	280.693	338.247	328.651	227.871	NA	685.2	480.769	351.15	NA	250.329	303.478	308.714	NA	39.6871	NA	248.594	256.861	NA	298.556
Nxt1	1849.77	1652.54	1869.83	2351.84	1100.68	2084.24	1876.16	1738.45	1538.38	2759.45	1368.26	1404.07	1193.93	1924.99	1555.63	1285.26	1056.51	2619.57	2687.53	2311.01	1771.15	2859.49	815.44	2187.08	1502.87	1540.06	2157.53	2262.33	1688.11	2207.32
Calhm4	1412.27	776.751	1857.27	1818.23	638.631	2411.15	3021.6	4295.9	2568.86	2873.54	1740.38	1485.39	NA	1172.98	1292	1754.98	NA	1108.31	1845.96	1447.74	3308.68	1881.89	NA	1136.74	NA	759.365	740.62	582.044	1585.89	763.417
Mthfd1	28089	29159.2	28723.1	27427.1	30315.4	30870.4	27166.6	28659.6	32084.5	30581.5	26962.9	28131	28939.9	30867.5	28206.8	25166.5	32704.1	32852.3	32135.5	33051.9	27583.1	28189.5	25924.2	26002.5	27112.3	26874.2	28399.3	25251	26336.5	24681.2
Mtr	1146.02	349.988	518.152	955.963	809.726	915.039	1148.16	600.409	969.4	772.023	794.53	922.532	807.361	1038.24	646.769	860.734	1506.68	867.126	NA	1158.42	1072.98	1071.24	664.631	547.977	656.271	398.165	818.997	602.683	802.586	758.955
Marchf6	611.958	800.408	NA	1010.57	984.131	NA	893.379	873.41	645.075	647.016	941.103	472.938	NA	837.726	1098.16	1324.05	NA	637.852	NA	793.393	NA	867.921	NA	314.401	1102.97	NA	NA	870.453	639.243	1079.78
Sh3bp2	1144.93	616.739	666.103	865.32	976.72	874.835	921.291	1045.4	780.876	849.189	1094.39	1044.51	772.595	1232.76	681.975	1128.91	917.217	993.106	1180.25	686.972	1060.31	800.871	1187.71	1363.46	1478.08	1863.46	833.621	754.896	1303.62	997.728
Acaca	11878.1	12186	11988.5	11488.5	10880.7	11142.8	13840	13353.8	13160.5	12871.9	12966	12230.5	14009.2	13853.7	12816	12911.6	11190.3	11207.4	11284.9	12008.7	13615.4	12722	10613.8	10720.5	13248.8	12717.8	13108.2	13939.1	13237.3	12846
Phf10	892.08	745.169	1009.03	857.819	1091.29	1249.78	1602.4	1064.84	765.498	1282.34	888.247	942.865	1278.13	913.72	853.943	616.773	784.892	1005	657.599	NA	758.651	1799.08	1247.43	1016.22	882.792	823.854	1271.77	643.971	672.263	567.843
Ints10	3380.02	3190.47	2612.64	3140.95	2815.28	2481.76	2999.88	3188.96	2380.25	2039.71	2725.07	2421.14	2745.49	2464.69	2028.06	2660.4	2531.39	2713.76	3257.18	3140.18	2702.19	2275.65	2709.92	2466.18	3164.34	2602.59	2381.64	2275.32	2335.13	2752.64
Ddx24	2691.22	1927.91	2758.1	2389.79	2602.29	2985.23	2380.52	2633.76	2060.72	2447.12	2134.85	2356.35	2127.13	1897.96	2451.22	1707.9	2793.21	2742.67	2985.5	2468.6	2094.89	2729.77	2657.44	1786.31	3173.71	3309.37	3522.73	2946.15	2381.32	1740.02
Smchd1	5538.8	5025.19	5503.32	5461.03	5395.13	5691.75	6011.09	6627.96	4701.85	5986.54	5543.26	5502.27	5925.46	5549.66	4958.49	5681.42	5268.68	5266.89	5724.11	6006.05	5396.14	5667.51	4967.87	5793.37	6373.41	5623.73	6429.96	5715.15	4073.02	5395.02
Rbm28	3580.64	3665.38	3618.32	4046.04	3164.09	3338.53	3839.92	3632.86	3515.44	3253.23	3511.78	3704.9	3677.83	3074.26	3070.27	2270.95	3747.02	3428.77	3163.97	3437.57	4167.25	3669.86	2544.33	3158.22	3399.66	3403.32	4146.25	4241.94	3201.78	2863.3
Tuft1	22739.8	22152.9	25051.2	23507.9	23452.7	22394.8	26229.8	25779.8	23639.4	22917.2	22857.8	20740.3	21056.2	23837.5	20599.4	16143.2	23297.7	23288.1	24869.7	24676.8	25092.4	23071.9	24567.3	24743.7	25907.8	26879.7	24234.8	25424	26008.3	25937
Man2a1	5525.7	6149.86	5471.7	6138.08	5689	5394.08	5833.4	5698.34	5864.88	5953.67	5754.63	6265.9	5817.74	6191.92	4476.17	4013.72	3886.06	4821.28	3964.57	5222.79	5529.87	5721.25	4035.64	3554.43	4074.05	4023.55	5366.21	5450.68	4147.34	4353.48
Wdfy2	4902.74	5375.25	4942.47	4279.92	4624.67	5161.93	4098.35	5485.81	5097.92	4691.61	4369.52	4440.02	4095.57	3831.3	4666.97	3882	4741.49	6085.26	5293.43	3395.95	4537.19	6543.71	5572.12	6894.28	6226.29	4377.55	5461.77	7428.81	6874.31	5679.61
Xab2	4081.69	4234.94	4650.28	4117.18	3880.76	3882.82	4682.76	4512.03	4180.67	4307.37	4106.53	3611.03	4841.09	4583.92	3837.97	3775.64	4156.65	4479.91	3064.34	3841.53	4022.95	4103.95	4539.42	3877.34	4325.65	3943.28	3895.36	4180.42	3558.3	4358.07
Pik3cb	1547.78	951.231	1829.62	1830.79	1351.16	1930.98	1653.04	1815.5	1194.42	1529.13	1072.87	1377.11	1575.45	1184	1560.7	1421.16	1969.51	1654.44	1342.24	1628.31	1617.12	1232.83	744.503	2109.1	1325.11	1915.71	1523.93	1569.88	1859.58	1108.85
Ppp1r12c	3233.39	3038.38	2292.27	3080.4	3156.27	3073.58	2797.28	3393.24	2675.34	3477.65	3221.25	2993.21	3730.96	3228.18	3714.15	2190.28	3853.59	3952.33	3042.26	2300.23	3042.6	2276.92	2950.8	3012.67	2682.36	2518.69	2288.78	2407.74	3090.11	2773.89
Prpf6	9341.99	10736	9360.42	11538.1	8427.23	9928.48	10414.3	10590.9	9977.16	10104.7	11088	10967.5	8839.03	10207.8	10698.6	10983.4	10664.5	10857.9	10896.1	9798.3	9897.39	10452.5	10069.4	9622.61	11592.5	14849	8801.71	10897.8	9824.65	11098.3
Ppl	96736.2	95613.5	100601	97128.6	89546	87854.4	89688.2	85704.2	92462.8	91158.7	95965	87429.8	83246.4	78886.9	77361.3	72258.8	100817	96209.4	109797	107055	94588.4	90930.4	94094.2	89552.3	90977.8	90042	100511	91861.7	92715.5	93274.4
Pole4	NA	NA	NA	NA	198.601	NA	333.929	NA	NA	NA	167.511	NA	NA	NA	NA	NA	NA	NA	NA	NA	NA	NA	412.59	NA	NA	NA	NA	NA	NA	NA
Phb	73939.7	73957	74623.8	77086.5	65551.8	68719.5	73693.6	76529.1	74974.8	72302.1	65372.8	66351.8	66290.4	72346.7	68511.9	68065.5	72177.1	74978.9	90161.5	85681.9	83946.9	71793.3	76386.9	77753.3	68662.9	66035.1	56986.9	58395.5	77439.6	69688.8
Dnaaf5	2276.14	2210.37	2161.98	2621.91	2757.14	3065.14	2866.24	3208.65	2339.22	2271.89	2445.03	2676.12	2672	2676	1891.81	2317.47	2406.77	2123.77	2088.04	2825.54	2794.64	2474.59	2045.34	3242.22	2265.76	2097.52	1861.47	2001.44	2298.15	3158.54
Akap9	1249.07	993.062	1231.03	1139.54	1394.41	1443.91	1270.66	1011.7	1138.01	1161.5	1046.5	1089.21	1357.14	1103.35	682.692	908.865	1140.13	684.451	929.997	906.311	1064.32	818.351	1152.19	1250.09	1021.8	853.403	1063.57	1123.12	867.031	1222.71
Syvn1	10800.3	8560.81	9283.55	10941.4	11656.6	12322.3	8628.76	12542.7	10567.5	11218.4	4239	7450.32	9548.86	6194.07	4985.3	12223	8798.3	8182.39	5504.53	5744.59	5971.34	7161.5	8498.88	8415.48	6253.51	6472.21	8339.33	13096.3	6952.13	6793.08
Eci2	11150.7	10449	10063.5	8723.75	12866.5	12872.9	10972.7	11266.8	10202	13474	13456	13587	13437.2	12348.7	10109.4	10284.8	11187.3	12370.6	6475.08	8061.58	9804.88	10990.7	8219.03	6310.31	9412.34	10227.8	6219.73	6999.76	9581.55	7149.71
Kif5b	42692.7	42121.5	44431.8	44448.9	43957.1	42391.2	42019.9	41772.4	39430.2	37604.3	38608.3	34314.5	41669.6	40450.4	34367.2	33377.2	41089.1	40091	43209.6	39187.6	42723.3	39039.1	44820.7	42236	42716.4	43464.4	47801.8	45191.9	45243	43795.2
Fkbp4	19323.3	17747.9	18144.6	19556.5	17246.5	17666.5	17398.7	18844	18740	19334.7	18942.7	18975.3	17200.9	19138.3	16630.5	17660.2	16156.9	18707.8	18019.9	18326.2	20568.3	17571.6	19962.6	15731.9	23556.5	22051.5	17543.7	19028	17682.1	20378
Ryr1	NA	NA	NA	NA	NA	NA	NA	NA	1173.74	1325.78	1704.94	1870.23	1122.23	1151.76	1610	1715.96	1391.08	1200.94	1332.5	929.463	12441.9	13025.8	NA	NA	609.51	NA	NA	NA	NA	NA
Nemf	6817.61	6747.84	6864.18	7084.1	6569.92	5858.5	6031.53	6804.65	5312.69	5223.61	6555.75	6419.29	4287.49	5986.51	6663.76	6488.23	5938.95	5645.63	7080.17	6414.38	6787.56	6080.01	5237.63	5314.87	6612.28	6904.18	6908.86	7465.73	6395.35	6121.1
Txndc15	883.226	1178.2	1383.08	978.153	1172.46	1259.86	1335.71	1345.05	1187.63	1244.52	1273.06	1008.09	1214.36	729.3	1474.52	924.91	1261.18	2097.85	977.55	1532.76	1506.8	1178.7	1092.59	1452.52	1372.13	1045.51	1058.47	999.563	1692.87	670.424
Tdg	4208.32	3717.88	5150.4	3300.24	3441.7	3484.79	4966.78	5114.82	3722.96	3936.43	5537.54	4917.43	4442.78	4020.54	5352.65	3062.3	3814.19	3748.2	3977.34	4326.75	4471.05	4754.13	2716.79	3444.14	3902.15	3651.15	4328.79	3503.21	4109.3	3952.85
Cltc	141130	141262	142961	147859	141325	141135	138907	140742	140648	146187	127311	117288	135475	134067	100250	97856.4	138354	135634	150722	155026	144902	144488	143488	141884	119139	117143	155365	158283	139678	141813
Cracr2b	369.868	451.535	264.547	363.409	363.612	NA	140.469	NA	NA	231.928	NA	256.342	293.281	526.066	NA	512.272	NA	444.097	NA	NA	NA	NA	458.832	431.648	NA	NA	NA	NA	NA	NA
Map4	52642.7	47683.7	55817.1	53076.2	60780.7	58051.3	44312.2	42237.1	53349.6	49916.7	39199.9	41311.2	45599.1	43024.1	26476.6	20866.7	51821.9	46299.7	39317.5	43294	38987.8	37355	55297.4	55548.7	42310.6	46091.2	47491.4	44486.5	46386.5	45874.6
Eloa	4687.36	3615.88	3875.26	4225.04	3492.51	3450.65	3320.8	3879.91	2890.32	2624.11	3870.44	3214.52	3142.19	3758.64	3052.47	3156.42	3410.3	3141.94	3221.66	4070.5	3019.13	3853.5	3855.87	3521.24	4838.03	4027.27	3560.19	3187.91	3097.78	3730.29
Copb2	85706.7	88764.7	89055.8	89487.8	92784	88689.6	85498.4	84131.4	86409.1	87095.3	73717.9	72136.6	80596.3	82133.8	59848.8	57903.2	66341.9	65324.7	74622.9	72158.8	75489.2	75782.2	69289.9	68400.5	66415.9	67129.3	72179.1	77363.5	64641.5	67571.3
Mrps35	2931.6	3724.71	4262.21	3877.61	4372.9	3519.26	3384.23	3967.3	3479.9	3726.48	4612.52	3396.16	3157.3	3801.39	2860.22	2778.37	7229.73	6189.06	2410.54	4680.87	4737.72	4320.63	3180.45	4628.74	4699.31	3853.34	4661.67	3942.24	3749.63	3108.13
Gigyf1	588.266	696.477	630.297	511.923	1357.93	NA	799.784	768.978	NA	NA	366	919.341	NA	769.762	NA	NA	NA	NA	NA	NA	611.017	1848.11	831.336	NA	438.458	703.074	1184.35	433.424	NA	644.534
Gigyf2	5872.29	4996.12	5461.64	5388.4	5801.74	4797.97	4687.1	5376.32	4952	4919.95	4528.07	4312.46	4530.96	4659.16	4051.75	3459.02	4362.82	5592.9	3579.18	4216.59	4875.08	4421.67	5084.67	4429.62	5222.89	5038.12	4387.72	4565.36	4051.74	4003.35
Sarnp	30029.2	36464.5	32926.9	32775.2	35016.6	34797.4	34438.9	34100.3	37105.2	37573.3	30450.4	34484.6	30384	32942.7	32816.2	31769.8	26959.9	28535	27136.5	27505.3	25894.3	28494.8	30490.5	35043.7	30987.9	30274.4	25608.3	23865.3	36885.9	36771
Abcb10	1863.73	1652.11	2249.62	2077.41	2017.25	1835.02	2037.32	2287.04	2330.25	2084.36	1771.85	2259.61	2391.25	2150.67	2059.83	1920.08	2444.74	1656.54	2426.33	1770.29	2326.6	2174.34	2136.49	2047.79	2851.93	1460.97	2851.01	2311.83	2321.29	2344.24
Vps13c	3325.55	3602.99	3545.66	3461.62	3669.27	3576.3	3397.25	3451.22	3160.25	3771.32	2766.86	3181.75	3499.64	3514.24	2588.04	2681.34	3271.86	3457.04	3075.38	2619.71	3429.17	3497.99	2851.7	3612.06	2912.09	2900.02	3546.19	4179.55	3272.43	3207.4
Tprn	402.359	359.846	429.817	483.441	238.884	270.024	497.284	242.872	445.864	403.571	488.906	564.4	568.624	332.966	217.415	225.17	737.373	472.776	544.56	608.182	605.225	257.891	317.399	365.541	564.888	475.643	463.118	832.76	446.105	445.411
Galnt2;Galnt4	1983.29	2455.92	NA	NA	1901.94	NA	1264.46	1410.25	1954.89	1640.68	1528.28	1376.15	2333.03	1945.51	638.584	NA	NA	2053.36	NA	1215.19	2419.64	2184.68	1833.67	2351.51	1333.52	1722.62	1156.53	NA	536.291	1219.09
Rpp30	6666.3	7241.1	7161.61	6746.08	5794.3	7118.84	6964.97	7191.25	6067.65	6973.09	8015.55	7956.51	5980.55	6253.54	6514.57	7740.01	5220.43	7166.33	6966.99	5451.21	7488.04	8012.01	5170.74	6783.91	6642	7005.6	6437.36	6794.33	6876.77	5737.98
Cad	14047.1	14840.3	14688.5	14818	14932.7	14453.1	14920.5	14068.6	14140.8	14314.3	13636.3	14476.4	14003.9	14609	16819.7	15782.7	12765.2	14715.1	16632.2	16553.4	15848.3	15288.6	11847.3	12700.2	15427.4	14736	15479	15597	13313.4	14409.2
Tia1	1018.84	1178.3	699.999	1332.72	912.172	820.643	865.141	709.339	1371.69	1224.8	803.781	1539.07	1272.23	1336.85	1481.34	1331.25	642.758	697.819	453.785	1149.83	765.214	1020.79	879.358	309.298	733.874	812.588	1888.02	1400.67	1170.01	1164.07
Nup35	3505.32	3429.72	4054.12	3818.89	4239.67	3432.64	4072.03	3732.78	3759.1	3802.77	3270.73	3726.17	3282.96	3445.89	4320.94	2594.18	2344.04	3244.56	2018.07	2854.76	2989.64	2907.16	2288.88	3904.4	3035.84	2849.09	1398.13	1812.18	3228.94	3939.91
Ywhae	148726	138357	180026	178682	153435	157573	170923	162702	165786	167650	130259	120744	161918	147128	123204	127262	193653	207864	187065	208763	161263	182751	184027	198729	168679	163451	153869	144336	200283	189639
Tnnc2	33968.2	66439.6	15743.3	26905.2	26541.7	19584.4	35453.2	16686.5	372644	295389	334570	313427	286965	281279	232179	202615	497195	304530	223586	245325	2834170	2434570	29803.4	44816.7	98790.1	94178.6	29165.1	18719.6	54732.6	51676.5
Golga4	15079.4	16626.6	17543.6	18481.5	16053.1	14218.4	16331.6	15574.5	15650.1	14730.5	14384.3	14683.2	14862.7	12910.8	10436	9465.44	12533	11935.6	14700	14322.9	11735.5	14033.3	12553.8	12812.3	12616.1	10637	12364.1	12601.8	13463.4	12681.3
Lman1	33631.6	31685.2	38322.1	33692.8	38223.8	38155.2	34303.4	29875.4	36248.4	35737.8	26898.7	30515	31936.6	31462.2	16784	17244.9	28223.3	29941.5	26499.4	27164.4	24552.5	22651.4	28984.3	22820	22026.7	22030	27399.4	24492	25461.9	27001.8
Serpinf1	46511.6	50791.5	38483.2	38672.6	52043.4	46573.4	37242.9	32569.2	57274.2	53220.8	30763.5	30445.2	36331.8	36624.2	15320.5	13286.6	27157.5	23076.5	19834	19138.3	20092.1	19997.9	13346	14600	12795	13547	13788.5	13175	15173.5	14664.9
Bok	2221.94	1897.37	1994.13	2263.44	1231.44	1944.43	2102.81	1604.31	1642.1	1728.15	1948.07	1989.38	1623.1	1987.25	1254.81	1791.06	2774.29	1338.73	1670.16	1953.72	2786.64	1280.34	1904.44	1981.95	2728.72	2335.15	2399.75	1267.85	2464.87	2018.76
Itih5	3223.75	3428.43	3253.73	3618.57	2986.42	2706.32	4545.5	3993.84	3665.75	3779.66	3506.91	3683.73	3978.75	3722.61	3878.11	3133.3	3793.08	3789.11	2491.58	2860.23	2862.11	2610.93	3786.61	3548.83	3417.13	3243.79	3068.73	3335.24	3287.87	3473.06
Ap5b1	585.442	357.369	480.089	587.254	593.628	798.687	692.881	713.039	685.377	529.724	465.644	642.097	826.646	253.007	615.274	495.273	NA	531.105	615.807	663.31	NA	1055.37	622.514	795.261	1200.15	799.606	841.68	677.708	829.927	542.319
Srrm2	9820.7	10641.6	9859.35	9896.99	9854.66	9263.59	10383	9583.06	9668.95	10193.2	9167.91	10650.2	9119.56	9813.74	9667.29	9322.78	7734.5	7822.72	8292.7	8077.27	6756.22	8044.08	6910.43	8329.21	9362.37	8731.62	10313.2	10648.5	9609.81	8689.81
Sdha	39967.8	36099.1	31746.5	35485.6	30937.7	34946.1	33155.3	30080.3	36066.2	38746.1	32690.5	32575.2	40135.6	36892.3	32628.4	33287.4	40013.7	42700.2	34124.6	37870.2	56555.2	50001.7	36997.3	36274.5	40721.2	39414.5	36426.3	40194.3	33445.1	34829.9
Nup50	5160.33	5278.46	4934.85	4856.84	4039.91	4624.2	3908.62	5165.73	4115.92	4785.4	4373.45	5174.97	4145.4	4397.33	4921.97	5308.61	3686.67	4897.21	4084.72	5374.12	5714.24	4518.21	3519.72	5034.25	5614.54	4906.02	4757.85	5347.36	4750.85	4804.9
Kyat3	5669.44	6647.02	6043.31	5917.41	5028.77	6333.48	5761.26	6658.19	5253.68	5804.83	6704.29	6761.94	7043.98	7301.2	7071.5	8555.55	4875.02	5960.72	5474	5294.83	7280.44	6558.78	5628.08	6164.52	6690.61	6656.89	6585.66	6563.99	5090.66	7726.91
Dpyd	1371.07	737.356	2369.24	1546.88	NA	1987.78	1561.39	4904.27	2417.68	2200.52	NA	1988.81	3016.38	2205.84	NA	3337.85	NA	648.245	NA	2059.69	NA	NA	NA	NA	NA	2375.71	2485.06	1626.72	NA	3046.35
Sec24a	5122.32	4076.95	5237.27	4228.18	4687.79	4958.11	4798	4577.33	5020.58	4856.46	4110.93	4092.52	4823.8	4519.82	4155.96	3743.76	3824.61	4420.24	4409.92	4095.16	4223.95	5284.1	2944.15	3225.2	4661.9	3961.44	4001.62	4963.52	4438.71	4319.78
Itga3	15584.3	16410.6	13483.1	13256.3	11478.9	14446.5	13461.3	13505.7	13466.8	11632.7	11523.5	12419.5	12993.4	12392.9	15259.5	15347.3	12574.7	12219.5	12181.7	13285.1	13702.2	11484.2	9641.66	8635.03	12634.4	11468.8	11471.1	11633.1	13382.5	13071.6
EEF1AKNMT	2257.32	2065.91	2141.47	1803.94	1931.79	1952.7	1791.19	1874.4	1925.99	1688.42	1888.54	2045.07	2203.69	2127.56	1652.86	1520.19	1770.26	1884.68	2062.89	1680.56	2015.38	2062.84	1746.96	1941.34	1749.72	1503.36	2589	1861.18	1501.32	2427.08
Aldh2	103967	112683	111936	107656	140232	145691	105860	107412	128872	131240	111060	117811	107034	129111	137299	125887	120767	117834	120500	116466	109912	122906	96685.4	115283	107970	111909	120785	121414	121684	118738
Palld	15131.3	16988.2	15516.1	16261.8	15349.5	15998	20124.6	19754.5	18185.9	17802.6	16692	20651.1	18521.3	22095.1	16907	13265.4	21345.3	22200.4	14110.3	13293.3	12954.7	15020	19006	19576.5	19236.1	20988.3	21844.2	22602.1	22107.6	21835.1
Commd3	4763.36	4202.95	4518.95	3949.7	4369.88	4977.54	3182.5	4030.83	3902.23	3834.48	3479.22	3595.79	4315.51	3887.85	3959.92	3432.27	2517.8	2574.51	3181.27	5566.87	2822.43	2898.94	4786.09	3297.85	3394.47	2854.63	1903.19	2093.14	4880.77	6268.96
Ik	5167.64	5386.15	4826.37	5255.47	5016.51	4480.33	5017.4	6171.81	4263.28	6008.13	5710.33	5943.94	5917.03	6082.99	6629.84	7795.65	2812.02	5249.37	4443.28	4686.65	5463.31	5191.49	3951.66	5042.76	6721.78	6660.44	4533.13	4890.2	5722.88	5095.96
Ccdc124	7206.58	5711.61	7309.21	6900.39	6652.07	5539.93	6181.7	5985.22	4817.31	6590.54	4228.62	4423.62	5042.19	4323.02	4700.19	6670.59	7527.92	6839.99	5521.92	5762.44	7577.12	6932.05	6427.35	6758.38	8352.97	8880.88	6025.85	5517.65	7057.34	6932.82
Ctsa	47871.5	48005.3	57150.4	46517.1	45413.3	45473.9	57705.2	57914.8	59291.3	56020.4	73387.9	62723.6	63798.3	60871.3	67886.6	56196.6	47860.2	51601.5	87835	93934.9	72337.4	64687.5	55887.6	44951.6	61213.8	49447.5	64863.7	61191.6	88383.1	76732.9
Naprt	5519.63	5772.73	6016.8	5662.69	6522.31	6476.36	6202.08	6101.18	6387.78	6651.16	5745.06	5722.54	5861.73	7948.09	6592.39	5585.84	6629.26	6330.54	4507.13	4090.4	6311.23	4810.48	6355.35	7062.67	5865.05	6376.54	6519.79	5857	4612.79	6013.67
Srm	48752.7	52314.4	54784.7	49351.2	56792.1	57860.2	51570.1	47973.3	58470.4	55191.8	42188.5	48410.3	62405.7	60981	36510.6	41199.8	45999.4	46010.6	51843.2	52768.3	48477	49405.5	37192.8	44522	42891.1	41786.2	39943.8	37628.8	47408.3	43890.1
Iqgap2	11230.8	11246.3	9075.82	9763.97	12046.4	12873.7	8780.96	8157.46	10574	11260.8	8667.76	9486.83	12283	13723.1	6689.83	6523.7	9088.82	9207.71	7029.15	6729.83	5669.95	5796.75	11172.4	12852.7	8308.29	7405.15	7900.36	7739.94	7995.94	8483.42
Smarcd2	8432.93	8157.63	8354.71	8129.2	9302.14	8309.71	9435.3	10157.1	8987.03	7229.63	7952	8787.24	8227.25	9314.63	8242.94	7298.53	9046.17	8718.35	7496.49	8913.46	8284.81	7997.7	6642.86	6332.93	6927.82	8557.06	8063.33	8281.09	8126.76	8199.28
Npm3	11144.9	9301.93	10990.3	12194	11031.9	11093.2	10530.9	11070.9	10894	12760.9	12038.9	12836.8	11742.6	11255.2	11298.9	12204.6	17424.7	14065.8	15991.3	14115.1	14484.3	17748.6	16146.1	14149.4	18210.2	16041.6	12749.5	15086.7	13347.4	12107.8
Rcc2	42073.4	45444.3	47309.6	48778.1	37728.5	46097.1	45859.9	49994	40263	45971	45395.6	49000.4	42403.7	43686	41683	40227.9	42634.2	48812.9	56017.6	51701.8	53464.1	50772.9	37268.4	42443.7	49481.5	51434.4	55138.4	54395.8	42534.7	47067.2
Cyb5r4	2640.58	2837.03	2976.17	3484.42	2703.85	2903.71	3193.19	3393.93	2481.26	2652.69	2535.25	2369.19	3038.82	2776.91	3164.94	2358.96	2023.9	2652.18	2582.29	2197.87	3257.21	2861.74	2872.91	2642.83	4057.13	3316.31	2459.96	2746.79	3644.76	2798.02
Cnp	9199.7	8421.94	11106.3	9723.58	12126.1	11665.7	11787.4	10913.6	11890.2	12316.3	13061.4	11770.8	15696.1	15754.7	5694.68	4571.02	13158.9	13189.4	8770.55	8054.86	10345.6	11289.7	9375.39	9038.9	6822.11	6059.46	10631.5	10218	7180.01	7114.49
Dcxr	1678.42	1500.61	1871.11	2202	2300.64	2556.82	2325.56	3101.69	3461.87	2989.8	2317.29	2077.53	2744.93	3458.89	1511.04	1722.36	2360.35	2228.82	1833.67	2256.46	1748.52	1640.1	2586.9	2917.11	1763.69	2166.63	1487.91	1388.63	2850.9	2642.19
Bag6	8654.67	7881.56	8725.1	8673.77	8927.32	8129.31	8366.41	7982.93	8638.39	7916.73	7095.55	6569.87	8260.49	7485.51	5981.9	5655.4	6702.86	6390.82	6594.61	7613.54	6742.34	5909.66	5822.23	6920.11	5282.25	7113.74	4967.4	5517.43	8086.56	8049.2
Stk4	3644.81	3423.79	4245.16	4115.97	4304.47	4872.46	4294.36	4562.19	3865.25	3932.61	3797.57	3973.41	3482.61	3703.41	1990.98	2292.84	3968.44	3973.8	2755.08	4671.05	3756.73	4075.14	4249.45	4781.79	3352.58	3969.7	3834.03	4332.56	4176.5	4077.09
Hmgn5	14982.6	20304	18065.8	18110.3	19604	18373.8	14853.5	21389.9	13749.5	15921.9	17413.8	21680	10580.3	13134.7	20566.3	18650.3	24501.4	27704.5	21693.7	25336.7	15478.9	15774.2	23831.8	20852.1	24081.6	31633.2	20186.4	16533.9	23592.2	30585.8
Eps8l1	28589.2	30586.4	31523.5	31217	28322.5	27328.1	33033.9	31908.2	28120.7	26622.3	32648.2	34878.3	26635.2	28111.9	43245.5	36534.5	31589.2	32739	35630.3	37057.8	38097.4	35320.1	29631.9	31386.1	33676.9	34673.4	35706.3	35054.2	37334.9	37240.6
Iap	3688.16	3935.09	4145.92	4867.48	5152.77	3831.27	4246.41	3917.02	3222.71	3640.11	4702.44	5890.39	3005.52	3677.2	3241.91	2153.72	4933.94	3888.11	3321.54	2410.77	2503.16	2775.01	2231.91	3139.16	2371.83	3625.95	2791.93	3687.18	2143.03	2076.38
Atp6v1d	16079.5	18926.3	16379.3	18468.6	15491.7	16893.4	15807.8	16538.7	13547.4	16129.4	18235	14826	20042.5	19603.2	16095.2	16502.2	19296.2	19583.8	14740.5	16231.9	14904.2	14063.8	19399.2	19024.5	20295.5	17593.7	17030.6	16019.6	19593.4	20090.2
Gart	18285.9	17156	17800.8	18309.3	17061.2	18489.4	16671.7	16538.4	17897.2	18993.5	17304.2	16742.4	16990.9	18473.9	17602.8	17898.6	16723.3	20259.8	19835.4	20525.1	19985	19285.6	16804.6	16433.4	16699.2	15782.2	17387.3	17900.1	17738.2	18304.8
Dhx29	4449.45	4434.48	4695.32	4617.61	4171.41	4734.39	4002.82	5313.74	3859.67	3976.07	5013.93	4216.94	3783.48	4641.06	6043.31	6872.22	3342.5	3637.32	3606.71	5050.65	4729.82	5060.38	3677.12	3802.67	4483.57	4671.01	5110.01	5589.83	3576.42	4403.5
Lmna	711909	715766	754255	721363	658671	628266	663733	622184	651328	635719	690489	630284	599036	569168	559639	494638	824250	791584	733866	800305	721586	698694	870722	800235	738141	737525	835403	835094	789681	741386
Nolc1	14090	15165.3	13261.5	14140.9	14480.3	14130.8	13347	15390.2	15707.2	13964.9	17119.4	17049.1	14953.7	14935.3	18822.3	20628.7	14069.9	16446.2	18213.6	16379.2	16839.9	18839.8	13094.9	16126.9	18975.1	19853.6	15678.3	17297.4	18096.3	19250.1
Pgm5	20606	16633.5	20015.1	17641.1	19972	18415.5	16969.9	16191.4	24157.1	26097.5	18165	19625.8	30204.3	33498.1	37483.7	34935.7	40891	42941.6	15538.2	16669.8	32349.1	40404.9	23954.8	23692.8	16846.4	15842.2	18151.8	18525.8	18193.4	22161.8
Strip1	6628.84	5733.97	6263.99	5412.21	6116.94	6486.99	6361.52	7309.19	6082.79	5363.67	6050.44	7095.88	6000.32	5749.54	7231.5	6630.42	4812.28	6398.58	5071.51	5159.43	6604.22	6095.24	4967.74	5580.01	7606.84	6598.12	4360.92	5749.32	6109.64	6941.63
Cdc5l	13308.5	13589.7	13585.9	12936.6	12500.9	11237.5	13478.7	12878.5	14172.1	11863.2	14525.5	13493.1	12599.7	12122.1	12054.9	10089.3	13454.6	15238.4	10015.2	13755.5	12858.3	12684.9	14068.1	11812.1	15651.1	16323.8	13173.4	12921.1	11764.8	12049.8
Sf3b1	21201.4	21922.9	22765.8	22347.9	21024.5	20336.5	23386.3	22061.2	20703.4	21659.4	19968.6	20359.5	21823.5	19731.9	16910.2	15574.1	19654.3	20905	16655.2	19641.1	21538.8	19179.2	21426.9	19236.5	22549	22581	18344.2	20042.9	20245.6	21779.6
Col15a1	16897.1	18665.9	19616	17640.8	19291.3	16193.8	18661.9	17057.7	22303.2	20342.9	17472.2	21061.1	21559.3	24461.9	14133.1	12465.8	16121.4	12912.2	10272.4	11377.4	11119.5	9764.69	16553.9	15971.2	12359.1	13466.6	13505.1	13812.5	15792.5	15011.6
Erc1	4877.53	4367.74	4913.22	4583.47	4139	4146.56	3654.66	4461.69	4204.21	4360.83	3330.63	3828.96	4012.57	3875.84	2057.64	2258.47	3414.4	3347.79	3738.15	2625.46	3168.79	3307.93	3890.31	3606.77	3279.78	3107.14	3245.36	3472.97	2662.96	3631.97
Znf593	3481.8	2739.42	2308.16	2203.16	1169.86	2352.27	1951.35	1863.04	2140.02	2378.81	2488.99	2280.92	2177.68	1587.96	3013.91	2808.18	7774.52	2256.19	963.173	2079.9	2641.64	1373.31	3089.3	3074.82	3927.95	4044.3	2501.92	1455.36	2297.18	2050.08
Igbp1	11106.5	10520.6	10652.4	10881.8	10454.6	10263.8	10237.9	10410.6	10141.5	9311.71	10595.5	11146	11563.3	10872.1	7465.95	7882.16	8318.53	9850.24	9025.87	9804.7	12144.9	9387.02	10834.7	9916.53	12247.8	11171.7	7325.31	7723.33	12098.4	11893.7
Hmcn1	776.757	1048.01	942.752	358.654	718.422	685.413	1120.18	1130.21	982.096	870.394	920.392	956.374	757.685	1008.85	691.619	NA	564.852	1437.68	508.692	NA	415.484	550.878	NA	NA	NA	873.358	NA	NA	NA	NA
Arid1a	3747.48	3829.31	3437.63	3574.64	4368.76	3944.87	3143.56	3446.36	3564.28	3067.4	2842.83	2800.12	3162.18	2673.08	3500.47	3362.94	3161.62	2550.42	3541.66	3173.09	2612.79	2635.5	3358.61	3050.89	2782.75	3188.8	2753.58	3075.57	3270.14	3735.79
Sf3b4	4358.1	5890.76	4923.1	7718.4	3337.87	6881.99	4503.19	5305.03	8391.98	7747.09	4961.01	5170.69	6827.25	5037.65	4723.08	3498.61	3840.85	6271.35	5177.94	4156.31	5482.92	6286.23	7931.95	7875.01	6279.01	8777.62	2648.07	5021.3	4105.88	5779.06
Rrbp1	49894.2	45942.2	47130.8	45745.1	59632.3	57429.9	39856.5	35496.1	45983	47710.9	33959.6	31819.1	39520.2	40046.6	14772.2	14230.8	21933.3	20479.3	22292	21391.8	23811.3	21845.7	24977.4	23643.6	16448.5	17426.3	18522.6	19169.8	19044.8	16094.3
Tbc1d5	1668.44	1608.15	1764.3	1379.49	1916.26	1918.41	1563.07	1433.84	1266.76	1749.82	1571.74	1382.44	1511.99	1780.07	1395.88	1270.13	1098.24	1459.48	1386.52	1636.2	1206.88	1278.75	1033.65	1415.06	1148.05	1623.45	1421.22	1220.98	1469.52	1395.04
Flnb	36006.6	36021.2	36927	35644.3	34476.3	35350	32853.4	31227.3	32183.9	32046.8	30461.4	29616.7	28585	29446.5	31047.7	31205	36327.7	34957.6	36921.2	39829.3	36855.1	35482.5	31313.6	33267.1	31185.5	30745.1	34670.6	34374.8	36033.1	34815.4
Macrod1	3665.9	5096.8	3236.3	4140.76	5652.76	6200.3	5858.17	5610.61	6064.08	6837.35	5474.09	5690.08	7748	6360.49	3666.94	4704.79	4783.8	6198.94	4783.93	6052.3	12709.8	13223.3	6066.33	4514.27	2978.51	3241.72	3531.76	4376.9	3832.42	5054.56
Ptprf	5995.27	5668.54	5764.06	6272.54	5296.97	6125.07	6086.85	6008.19	5796.21	6159.01	6573.15	5677.91	5446.89	5923.35	7435.36	7637.95	7090.54	7287.91	8025.95	8901.23	7589.06	7859.51	4689.45	4998.35	6444.97	6464.37	5956.4	6192.85	5482.93	6289.81
Jagn1	9415.8	6444.97	5910.09	5754.93	6728.34	6864.09	3663.92	4688.35	7203.79	3436.35	2087.22	2458.13	6663.47	5012.38	2416.38	3662.27	3853.11	4324.04	3916.25	5940.2	4446.73	4350.98	7398.29	6053.26	3938.67	4409.04	3409.15	3404.41	7289.48	6119.8
Cnot3	6082.15	7027.06	6038.69	5984.32	6146.89	6133.53	6297.74	6944.06	5355.83	6465.13	6977.43	5711.32	5655.81	6067.63	4886.69	5059.44	4498.59	4908.93	5911.4	5547.88	5592.79	5947.19	6984.3	5512.41	6256.15	5227.5	5665.44	5947.7	5436.7	5810.4
Tiam1	2960	2680.02	3149.23	2664.33	2823.38	3299.38	3322.3	3479.99	3391.3	2547.13	3683.81	2779.6	2746.66	2898.74	2794.43	2877.59	3254.87	2812.35	2789.18	3361.86	3420.59	3122.91	3818	3172.62	3939.53	3817.65	4376.91	3423.41	3289.92	3603.21
Gosr1	2634.68	2377.83	1873.54	2286.18	2256.67	2288.02	2210.7	2882.24	2119.41	1946.43	2667.59	1553.42	2705.83	2021.81	1114.38	1211.98	2210.93	2048.19	1933.44	1709.74	1917.35	1696.38	1856.84	1936.92	1564.44	1249.58	1155.48	2149.09	1878.48	3446.61
Oxct1	58462.7	55620.4	60602.8	62726.1	53829.7	53430.7	58554.9	55252.4	61268.3	54881.4	52755	53711.2	60253.6	57184.9	53949.3	42226	53808.9	59916.2	62862.4	54803.1	56086.2	57219.3	56421.2	60079.4	52283.5	52650.8	61395	56585.5	54927.4	48776.1
Hnrnpm	65599	67866.6	66071.4	67650.9	62207	64906.9	65258.8	69664	66526.7	71608.9	63613.5	64490.3	56665.8	58943.9	74007.3	71361.8	52185.4	54539.9	60926	65463.8	60044.8	61855.4	54422.9	58013.2	60726.9	63533.6	55906.1	59497.6	65223.2	66709.8
Tjp3	4867.64	3874.51	4017.74	3820.84	3072.99	3590.06	4592.97	3925.06	3540.88	4239.45	3618.14	4085.05	4069.92	3425.8	3635.92	3196.18	3130.24	3829.7	2916.1	3444.72	3237.68	3561.29	3477.57	2689.56	4705.49	3912.52	5223.15	5074.18	4595.52	3947.07
Hspg2	43598.3	43129.2	43566.1	45800.5	36364.6	39131.9	41407	43441.8	44847.7	48612.7	45298.6	40353.9	45461.3	44754	35202.5	35212.3	49121	48285.8	35559.3	37550.7	39923.1	40836.1	38173.7	39781.7	32646.2	33555	40745.9	44341.4	39742.2	38759
Rplp1	101463	103396	101520	89890.8	124906	108954	113008	109510	105240	101636	139478	134701	94702.4	84720.9	180532	181351	72869.1	53674.7	47225.5	62803.8	109866	119601	66682	36827.2	82237.6	99455.1	69742.3	47776.4	123756	122523
Ruvbl2	24958.3	22944	23395.1	23565.8	23146.4	22603.8	24153.9	25542.8	24634.1	23681.9	24344.4	20482	23858.3	23216.1	20479.4	18073.2	23509.5	23391.2	22052.6	26116.6	25254.8	25087.2	23424.8	23399.9	25529	23855.2	23819.8	23643.2	24206.3	23001
Pcbd2	1750.61	2609.71	3015.63	2430.06	3007.44	4366.79	2553.71	3519.12	2561.5	2941.12	3226.67	2787.66	3872.22	2413.91	4401.62	4393.77	1610.15	3015.64	2885.32	5103.71	3323.96	2934.46	2646.48	3463.51	2054.42	2453.64	3587.91	3009.81	3773.36	4411.8
Polr1b	1306.7	1116.44	1100.57	1496.15	1090.71	959.494	1229.09	1316.97	1163.28	1452.87	1207.72	1307.52	1303.63	1306.99	1459.76	1469.14	1223.42	1281.33	1609.09	1320.65	1266.47	940.014	1342.01	1731.88	1544.3	1531.25	1166.23	1702.98	1307.18	1477.89
Chmp4b	22614.5	27528.3	21773.9	25450.7	27406.9	23722.9	20895.6	23128.2	22033.4	23746.5	21151.8	18829.7	26038.5	29254.4	11657.4	10670	19529	22233.3	18263.5	19468	22231.1	18560.7	26851.3	26075.8	21977.8	21728	12542.7	13269.3	24140.1	24340.5
Pa2g4	153276	168587	180777	191655	160044	159224	189604	177169	161862	163371	167006	174563	137703	160488	196885	184572	200296	206195	240446	242959	204864	214906	174260	194844	214947	232689	238239	211244	213363	193772
Vps33a	4493.57	3842.57	4286.27	4339.93	3600.53	4351.2	4602.57	4231.6	4275.46	4476.61	5410.55	4893.41	4378.42	3664.52	4699.73	4818.1	3296.71	4357.72	2816.19	2982.58	5124.69	3140.76	4747.19	4553.22	5015.05	5698.81	4022.8	4130.08	5301.58	4690.29
Cct2	67894.2	72076	63025.4	71154.1	57578.8	66468.8	61648	68489.4	60853.4	67417.4	63130.7	63885.8	65416.6	67738.2	47744.9	57806.9	64127.2	71599.6	77530.2	74313.6	70591.6	72757.9	54371.3	64695.3	61184.4	61777	75243.1	78456.8	64268.1	74609.6
Acad11	6476.33	7103.41	7033.15	7340.55	6285.8	6636.38	7025.5	8647.57	6683.51	7300.12	7079.22	8768.34	6698.63	6840.23	6314.1	7931.66	5838.73	6854.22	5330.41	6430.34	6598.31	7252.69	6115.04	6108.09	7547.35	8020.88	7384.4	8256.42	6570.55	7588.06
Raf1	2044.86	1128.51	1537.22	1181.17	1653.33	850.926	1655.1	504.925	1726.88	781.504	1237.97	1446.18	1093.95	1283.81	1145.15	1387.69	999.446	764.271	907.071	1431.84	2214.83	1410.52	1414.01	1380.19	1565.94	1368.66	1585.56	1113.64	1626.39	656.683
Stxbp1	3585.73	4291.66	4124.14	4290.52	3959.63	4257.6	3579.44	4051.62	3740.79	4353.92	3371.32	3872.35	4545.87	4351.13	2286.27	2069.99	5387.15	5646.51	3030.94	2897.11	4018.68	3407.29	4208.29	3863.87	3782.12	3906.77	3274.05	4634.21	3731.45	3085.39
Sgpl1	42749.2	42059	42596.8	44120.9	40197.6	43359.9	50535.7	49407.7	44954.8	45299.1	36394.6	40877.6	40096.1	40452.1	30238.1	29856	43147.7	44767.7	37186.9	41390	45943.4	45471.4	40627.4	46281.7	44243.3	45813.8	48317.4	55258.9	42432.7	46911.4
Rpl14	215601	244810	185103	215370	188396	223399	200227	222155	173741	207563	277712	286208	199081	166723	263824	340368	146554	145290	203410	215532	269209	254301	212928	174898	218580	236393	188686	231779	186121	205425
Smu1	11434.7	16368.6	13393.9	15999.2	12113.6	12943.8	14473	14559.1	14204	14845	12490.2	14360.2	13329.9	14743.6	13291.1	17611.1	14936.9	17087.4	16373.7	12353.8	14006.7	14863.3	14030.8	17915.4	17039.4	16615.8	15443.1	16556.2	12723.1	17038.8
Rbm14	20799.8	19645.4	20257.2	19560	18451.3	18558.1	19178.4	20637.4	21941.7	20164.3	19561.5	20827.5	18911.3	18708.7	18426.9	18426.3	16556.7	17036.6	19661.4	19022.8	15882.1	17919.9	16835	18821.1	18813.8	17849.1	21282.5	21984.5	20256.7	18237.8
Akr1b7;Akr1b8	18739.2	26973.6	32270.3	27349.6	23658.2	31673.4	17089	24736	23007	26869.2	15701.8	24445.8	24618.1	25669.8	20727.4	12658.3	32640.4	21917.4	28290.6	28246.7	24281.4	26105.8	15272.6	19784.2	15542.1	15667.9	20354	19375.4	NA	19807.5
Fus	131511	111533	108393	115749	109943	96190.9	102077	100535	111498	107661	103696	101965	96683.4	97090.1	75658.7	68912.5	100142	76855.9	93595.5	110067	80632.1	77619.2	117127	104536	97797.1	105461	69419.5	69865	108876	107887
Syne2	8422.17	8118.32	8804.44	8338.31	7656.3	8018.99	8441.09	8450.23	7385.22	7332.33	7535.55	6858.56	6852.2	6893.81	6442.85	6432.19	8203.64	8216.83	7880.77	7425.05	7097.88	7144.76	8020.14	7683.88	8200.97	8284.22	7957.82	7965.58	7436.79	7486.11
Vps35l	3362.16	3645.7	3802.91	3491.6	4276.87	3554.42	3375.28	3467.89	3479.71	3605.75	3683.17	3658.02	4010.47	3564.46	4242.09	3346.99	3666.14	3292.91	3595.62	3424.79	3804.16	3552.95	2425.31	3085.48	3068.42	3097.06	3033.68	3307.8	3084.96	3486.83
Adgrf2	1027.65	1415.18	1451.72	1399.39	1020.72	621.937	1639.16	1813.14	1040.64	1683.7	1518	1070.97	1521.68	1080.51	1180.96	1524.6	NA	1192.84	1485.66	757.166	3010.75	1537.6	NA	1692.28	2179.47	1671.34	818.352	1656.08	1313.37	1296.67
Crispld2	1008.03	811.836	675.942	636.866	250.653	227.569	541.546	607.648	NA	756.238	902.764	361.845	971.877	NA	NA	NA	272.065	972.946	NA	NA	1037.01	403.527	2440.9	1592.63	1039.62	597.094	NA	NA	NA	NA
Eif4g3	9217.52	7936.38	8825.84	9324.3	10534.5	10784.1	8901.04	8070.23	7458.28	7263.41	9066.74	8311.98	8039.28	8137.7	6744.46	6837.29	7629.84	7379.51	6060.94	7320.36	8560	6794.9	6722.41	8850.71	8422.83	8182.94	7001.86	7279.32	7062.72	6967.43
Thada	1585.07	2140.04	1614.06	1643.53	1737.94	1290.76	1636.44	1868.13	1631.55	1653.59	1737.61	1953.3	1909.07	1691.57	1846.43	2074.72	1417.9	1706.91	1794	1553.42	1474.1	1549.72	1024.66	1083.68	1622.45	1851.07	1541.37	1482.18	1469.08	1453.52
Prmt5	9386.48	9281.35	9556.83	9077.07	10230.1	9543.75	9810.8	10163.2	10371.8	8839.29	9371.08	10312.1	9009.22	9619.93	12463.1	11823.7	7787.37	9126.84	9200.66	8974.71	9473.86	10407.8	6128.07	8843.34	9783.79	9516.09	9754.33	10450.9	8712.96	9690.63
Ttc39b	6705.41	7210.69	7266.26	7748.29	6723.97	6279.15	6135.71	6144.4	5759.15	5199.56	6271.11	5544.79	6430.29	5672.38	9515.14	7829	7610.7	7777.43	6755.67	8218.65	9369.46	10301.9	7601.06	5247.75	7594.42	7300.53	8217.16	7686.93	6832.05	4908.63
Gtf3c5	2784.01	2277.14	2649.78	2771.67	2323.89	2884.79	2387.4	2470.48	2396.84	2885.47	2714.45	2405.44	2790.52	2522.4	2263.43	3077.28	2235.7	3272.87	1797.1	2427.04	2456.81	2220.1	2340.49	1897.9	3017.02	2269.36	2123.37	2882.47	2175.74	2044.02
Emc1	17157	18137.8	17023.2	17556.4	16148.6	15095.7	17610	17749.2	15757.3	16004.8	16279.3	17947	15152.8	15571.8	15027.7	17134.4	15117	15014.5	17621.5	17479.8	17940.6	18198.4	12195.9	15259.2	16675.6	15627.3	15564.9	18602.6	15559.8	17728.7
Exoc3	8665.38	7522.05	7801.81	8606.18	6623.93	7367.16	7272.42	8412.73	6775.85	7925.62	7002.72	8306.84	7630.39	7331.1	7687.07	7524.47	7001.58	6658.81	6562.75	7453.04	8026.08	8144.01	8611.55	7832.51	6953.86	6493.35	8074.95	7422.3	7519.56	8601.31
Acp6	9117.46	9302.83	10729	9192.33	11722.8	12202.4	11013.2	11938.4	11388.5	11991	11741.1	12252.5	9798.99	10534	12262.8	10903.5	11341.8	11719.6	7982.35	7689.28	9661.01	9980.64	9669.41	8660.52	9825.84	9250	8887.47	12043	11555	9665.26
Ddx21	27296	27115.5	30879.5	28452.4	26961.4	27526.6	28245.9	27112	27963.8	26700.4	26147.3	25947.3	24454.3	26793.9	29966.3	26754.5	32486.5	31864.5	33235.1	31004	34042.2	32262.2	27649.6	27265.1	30289.8	30899.2	35251.6	31219.4	30488.7	28649.1
Rab24	3130.59	3644.34	3891.41	4492.29	4119.9	2862.46	3864.8	4347.09	3601.9	4290.35	2739.95	3601.01	4081.9	4211.39	2049.34	2472.62	5373.7	4738.56	4499.74	3485.63	2969.94	4361.16	4768.82	4723.44	4216.99	4585.82	5583.31	4471.89	2860.97	3309.84
Slc27a1;Slc27a4	3261.58	3860.36	2594.74	2557.8	6024.92	4968.71	4492.63	2094.64	6215.9	7390.92	8126.34	5962.91	7013.01	6213.05	3943.01	3668.36	1479.43	1318.37	1453.33	2160.29	2942.12	2652.4	704.276	934.446	585.046	1199.82	5653.36	8228.64	3984.37	2238.34
Specc1l	1279.18	1358.03	1415.52	1281.8	1521.23	630.726	1482.79	1357.34	1177.92	1296.46	675.613	1337.78	1272.97	1597.48	1070.48	1097.8	1119.96	1438.8	1426.72	1489.53	1329.06	1242.28	1264.38	816.78	1302.11	1358.54	1365.62	926.261	1277.97	1058.1
Eml4	5559.26	6864.44	6178.86	6675.93	5929.85	6036.81	7330.57	7120.17	6162.68	5474.79	5811.28	5575.67	5739.63	5646.17	4910.7	5893.12	5360.35	5684.43	5766.09	6353.71	5901.78	5882.64	5553.91	5325.62	7035.3	5740.64	6067.63	6753.95	6000.87	5900.87
Eml3	4039.46	3673.15	3677.37	3475.65	3776.02	4022.56	4361.82	4262.14	4164.3	4176.94	3814.31	4255.57	4434.14	4786.92	3571.47	3745.11	3336.98	4451.3	3441.37	2676.21	3876.19	4136.85	3513.17	3890.93	3291.02	3295.93	4098.43	3805.96	3968.26	3674.68
Farp1	4595.92	4629.62	5822.08	4693.09	6372.78	5594.59	6572.02	5544.75	6642.88	6371.54	5002.1	5132.73	6460.35	6369.6	3081.36	1766.22	4259.3	3997.26	2674.16	2938.79	3555.52	2979.27	5329.46	4718.59	3786.23	4148.89	5130.41	4344.09	3473.54	4298.2
Ints14	2426.08	2570.46	2281.17	3020.9	1997.51	3256.44	2321.58	3577.52	1959.13	2268.14	2021.27	3227.22	1775.92	2534.36	3580.88	4575.35	1315.52	2156.34	1039.53	2527.49	2800.01	3279.67	2227.71	2519.88	2503.16	2504.6	1767.08	2297.31	2114.37	2584.43
Dpysl3	55438.7	56591.1	57881.4	51644.2	67326	64700.4	52840.3	49623.4	57223.5	57890.7	47379.7	44028.8	58612.3	61214.4	40144.3	33215.3	51251.6	50867.4	53045.9	47153	38210.4	43125.9	60461.1	57411.2	54331.1	53405.4	52388.1	49815.7	53020.5	55565.9
Dpysl2	79214.7	72266.7	75317.9	73741.1	83328.1	86827.9	68208.8	68137.8	74792.8	79583.5	66183.1	66844.2	96469.8	84902.7	32875.1	28831.1	66796.3	72127.7	54364.8	57311.3	60257.1	51484.7	90374.6	85340.4	62871.6	58101.4	80510.9	75637.4	76339.8	70699.7
Pafah1b3	13980.4	17194.1	13289.3	14728.3	14658.9	17885.7	15171	18004.9	18120.7	21007.9	17756.9	17428.2	18037.6	20937.1	30330.7	19276.4	9187.96	11313.9	11858.7	16198.2	9219.94	11362.2	15370.9	16225.4	14836.7	13773.1	8530.33	9972.28	20104.1	21848.8
Plec	136579	139199	133207	136947	125311	126684	118452	117954	119585	121374	117046	110136	103923	106223	95656.2	98466.3	121911	120485	145615	147439	123723	125055	136103	129150	118015	116138	127902	128508	120736	123346
Vta1	18220.9	19527	20749.6	19033.8	22442.9	22676.9	18985.3	22886.1	21198.3	21071.9	20051.3	22166.5	18190.7	22656.7	19894.7	16164.7	15207.2	14095.7	14993.3	14798.2	14706.7	15702.7	14545.7	17611.8	17396.3	18472.6	10413.8	11925.1	19441.4	19866.9
Grhpr	13460.8	13244.4	12320	11296.3	13167.6	14527.4	13372.3	13451.8	14320.9	14949.2	13518.8	12657.4	16673.4	18912.1	12766.5	11665.5	14055.7	13296	14699.3	17845.4	16438.4	10930.7	14927.3	13486.7	14286.3	15490.2	13880.4	14311.4	11859	12426.5
Safb	16113.4	14352.9	15751.5	13905.9	13562.1	12491.9	15776.9	14504.6	16389.8	14657.4	12392.1	13034.5	12294.5	12878.3	10609.8	11518.8	15770.2	15267.8	12360.3	12952.3	16119.3	16153.2	16732.1	15746.7	16675.3	16296.8	17985.8	16403.6	13263.9	15336.2
Hpgd	596.422	460.18	NA	710.378	493.893	855.884	NA	535.894	765.694	825.391	430.928	348.538	872.356	523.768	320.981	590.109	514.424	531.494	917.364	1000.6	838.364	730.191	NA	450.412	100.378	NA	431.907	671.659	NA	NA
Qdpr	21268.7	23239.4	23653.7	25122.8	29272.3	28151.6	23530.9	23676.2	33232.9	30130	22129.9	23322.5	29668.8	35856.4	24939.2	19276.6	25771	24183.8	25504.8	26017.9	25660.1	28050.4	26859.4	29270.9	21087.6	21983	25164.3	27533.7	27424.4	28718.1
Samd4b	2945.87	1735.08	2380.99	1765.3	1630.15	1738.86	1908.2	1531.3	2307.18	2124.05	1854.02	1300.14	1791.75	1761.32	1904.4	1269.72	1390.62	1066.26	1220.34	1455.34	1252.57	1128.63	1566.15	1936.29	1009.97	1560.44	1519.1	1045.5	1715.96	1391.01
Phka1	313.639	NA	NA	499.152	567.57	228.992	NA	NA	283.913	195.776	442.717	410.199	636.441	617.183	417.899	471.233	934.665	422.896	135.92	712.432	2544.98	2257.6	859.472	NA	NA	NA	NA	NA	NA	NA
Shmt2	36667.5	38383.4	33225.5	37441.8	33957.4	33408.2	36250.2	38084.8	32501.6	34070.2	34363.7	35761.1	33205.3	35777.3	32075.7	30032.8	31655.2	33242.9	40111.6	40171.3	35588.4	41843.7	27290.8	30548.9	31703.6	33897.7	29856.4	32069.7	30953.4	31479.7
Fam83f	2950.21	3705.73	4085.73	2642.88	2571.06	3546.91	3536.03	3645.21	2929.98	3482.63	2262.47	3122.52	3057.84	3402.33	3577.98	3019.51	2958.94	2921.54	3212.42	4025.22	3461.37	2751.71	3449.74	4353.45	4484.14	5302.52	3928.6	3839.92	2705	4365.4
Synm	5312.21	5694.23	4498.38	4341.15	4452.46	4795.37	3475.07	3815.38	4802.36	4767.81	3483.61	3859.9	5890.22	5995.48	4075.41	4044.95	8312.07	8469.23	5700.73	4646.47	10494.1	10617.3	7077.69	5363.14	4561.51	4997.42	5770.73	4565.23	4739.56	5056.31
Celf2	2655.77	1600.83	1585.6	1829.81	2680.72	2086.61	1706.72	1828.98	2475.37	2618.43	1823.39	2063.8	2441.29	2372.41	781.933	894.062	1286.39	1270.25	1377.77	972.529	1513.31	1262.51	640.667	1974.63	775.906	866.882	893.235	1015.75	1080.25	1619.54
Celf1	6429.01	6608.22	6072.04	6237.65	5536.78	6243	6036.4	6113.93	5359.8	6988.88	6119.59	7686.43	4661.61	5406.29	7173.19	5754.4	4180.76	6314.01	6290.94	7007.79	4405.64	5360.36	3892.48	5060.67	5004.68	4694.07	5442.44	6886.39	6729.41	7862.91
Znf598	2628.32	2176.8	3353.67	2266.79	2530.02	2143.07	2880.21	2524.92	3022.12	2302.78	2545.47	2121.21	2292.3	2593.13	1587.75	1853.46	3063.49	3096.04	1919.86	2916.64	2541.78	1350.41	2581.77	2740.65	3586.58	3449.78	3563.71	3482.74	3149.54	2700.21
Tsr2	2030.94	2017.17	2140.47	2219.65	2404.6	1705.01	1622.52	2226.11	1911.02	2098.53	1860.89	1756.84	1627.52	2178.14	2581	4106.83	1510.14	1757.37	986.258	1442.14	2137.19	2003.94	1794.41	1833.19	2739.04	3250.06	1106.1	1031.39	2000.43	1914.38
Smarcc1	9395.86	5951.99	9397.27	8654.93	9403.44	8303.58	9647.79	8842.2	8312.98	8282.31	8242.38	7463.29	8190.86	7746.04	6252.42	6011.77	8801.51	10826.1	8961.05	7746.88	8525.8	8338.32	7536.03	8415.21	7955.27	8874.65	8530.54	7507.29	7451.98	8083.14
Tubgcp3	2220.1	2032.71	2309.83	2188.2	2191.25	2501.03	2684.42	1862.96	1988.57	2031.81	1904.69	1952.85	2118.64	2294.39	1574.61	1681.13	2461.65	2617.59	2453.69	2581.22	2175.97	2315.07	1920.14	2103.66	2195.92	2329.16	1775.1	2227.67	2786.47	2147.99
Hars1	43343.2	44601.9	45461.4	44473	42107.6	41757	41138.6	39814.1	39771.3	39527.7	49618.9	44340.6	44062.4	42997.7	50172.4	53273.9	45294.4	46567.6	49920.8	53666.9	58819.7	52136.1	48469.6	50612.1	50874.5	49912.8	43311.2	41865.1	48668.8	50850
Acap2	16881.6	16074.7	18768	17670.3	19104.6	19119.1	19382.5	19507.1	18526.7	19702.7	14954.8	15389.1	16968.5	18769.7	13731.8	12017.3	17940.2	17341.4	15483.4	14996.1	17400.8	16732.1	18882.8	19653.9	17088.7	17050.1	22560.2	22707.1	20004.1	19745.7
Xrn2	9126.12	9424.04	8861.23	9278.3	8352.89	8770.99	8660.3	9357.78	8107.87	8988.45	7768.97	8983.02	8747.74	9037.22	8184.8	8018.73	8566.44	8866.01	8245.88	8134.27	9006.77	9250.33	6903.73	7858.22	10026.9	9342.56	6918.85	8313.74	8511.68	8492.73
Krt19	49698.8	49902.9	29078.1	27812.9	30291.7	31762.4	19077.5	20290.9	37277.9	37703.1	28455.8	25505.2	65300.9	56586.8	21040.3	20394.6	42269.7	38295.5	22352	23227.3	983.237	1024.11	60351.5	54504.8	37824.5	37180.1	29878.3	29991	36590.7	39161.3
Fbxl8	925.724	758.308	807.408	808.276	1033.09	803.266	776.397	753.014	928.999	968.596	1433.73	776.919	898.501	1391.59	783.511	1122.39	839.983	1080.74	1329.69	577.472	791.293	506.498	1401.77	925.158	716.843	675.263	717.452	625.968	1646.72	724.71
Pm20d2	NA	594.897	NA	280.706	340.638	438.476	662.536	608.657	539.586	512.711	NA	624.99	656.747	398.527	NA	NA	491.548	502.631	NA	1175.23	627.216	960.113	NA	NA	561.327	638.68	NA	NA	NA	736.671
Snrnp200	22922.5	21103.6	19728	21321.6	18525.8	18793.1	20001.2	22149.3	21288.9	20716.9	18483.4	18799.1	20520	19881.7	16868.3	15673.2	20057.3	20233.4	18522.6	18778.1	20773.7	19311	18364.4	17739	20854.2	19461.6	21888.2	22635.8	17295.4	19437.3
Prxl2a	37195.9	36935.4	37688	35427.5	33227.3	30404.9	39313.3	42477.1	30298.5	33860.2	38509.4	40955.7	31401.9	31800.5	40665.6	41059.4	45569.7	47946.2	44552.4	44431.5	44614.3	43301.5	36768.7	38851.7	46516.1	52090	45641.3	47102.1	41018.6	44165.7
Phkg1	NA	NA	NA	NA	NA	NA	NA	NA	NA	NA	343.78	NA	NA	NA	432.189	308.803	NA	692.383	NA	1110.15	2356.68	2179.94	NA	NA	NA	NA	NA	NA	NA	NA
Sfswap	1338.65	1089.34	1302.29	1482.14	1045.8	1266.87	1076.7	1423.83	1366.45	1639.42	1984.81	1435.02	1417.16	1556.83	1630.26	1461.99	1150.09	1035	1623.5	697.086	1101.8	1353.85	983.501	1007.68	1371.38	1418.13	1522.05	1452.4	1551.15	1831.41
Obscn	NA	NA	NA	NA	NA	NA	NA	NA	2236.07	2798.37	3673.55	3413.84	2899.56	1983.51	3250.21	3430.73	4791.18	3943.33	NA	7531.31	18429	15964.6	NA	NA	NA	3932.4	NA	NA	NA	NA
Tcof1	11248.2	11426.4	10353.4	11920.2	10111	10531.5	12438.3	12218.2	10487.4	12007.2	11013.6	12374.7	8012.11	10673.3	10151.6	10206.9	10743.1	11082.7	10698.7	10319.8	9979.5	11295.6	9071.56	12483.1	13031.9	14059.5	9868.77	11389.7	11379.2	10309.6
Gtf2f1	4027.96	4020.69	4174.47	4097.53	4110.16	4281.14	3749.54	4256.42	4135.43	3895.76	3374.76	4330.25	3593.46	3719.67	4213.57	3981.05	5442.79	6582.99	4497.88	4328.48	3638.22	4281.98	5999.57	4874.21	6468.35	6877.08	5217.19	5388.52	6712.57	5373.01
Hcls1	4533.92	5320.57	6560.77	5397.9	8684.97	8584.8	6352.96	5127.03	5953.96	5947.82	5461.21	5907.67	5229.95	5322.84	4061.08	4501.42	5773.13	7264.78	5899.54	5569.38	5426.47	6797.03	9718.21	10073	5565.01	6382.83	6312.48	4579.78	7992.6	8051.87
C8a	6498.54	5436.35	5803.75	4873.72	6639.24	7455.96	2814.88	1716.24	1585.23	2111.3	2960.77	1900.15	2104.4	2522.04	5388.46	4423.86	8219.05	9186.19	8471.99	7834.75	9761.26	9642.38	1683.63	1043.01	1267.83	NA	1183.09	1834.77	956.197	746.248
Naa10	15600.2	14767.8	22094.4	23467	17107.1	18807.3	20865.9	19688.2	14539.4	18070.9	14571.7	13662.8	18172.3	17051.1	14484.6	14281.3	21075.4	26011.2	23109.4	19314	17468.9	17617.5	16785.3	19206.3	21921.3	21610.8	22479.6	21780.3	27711.7	24636.7
Dop1b	3436.51	2760.42	3064.39	2943.08	2059.29	3152.28	2465.84	3390.73	2542.56	3139.33	3020.81	3222.16	3160.74	3118.12	3420.82	3771.44	3483.27	2046.8	2473.67	3188.45	3346.82	2223.5	3155.57	2027.19	2564.27	2646.09	3406.35	2897.89	2763.19	2011.25
Wasl	5363.06	6520.74	4876.36	6681.73	6593.89	7093.34	5650.39	7401.83	5895.58	6407.66	5913.87	6400.77	5805.43	6032.79	4506.45	4299	5736.89	5604.75	5492.75	5476.08	5001.73	5633.63	6212.32	5554.25	6150.22	6456.81	5261.76	5538.37	5154.35	7254.83
Ube2o	4141.94	3575.12	4689.18	4552.61	5003.9	5209.5	4131.58	4326.47	4587.4	4718.62	4403.52	3742.65	4954.41	5035.87	3711.5	3740.46	4493.77	4280.72	2850.63	4521.79	4603.73	4807.02	3875.54	4300.26	4644.93	4657.1	4432.02	5393.45	4909.57	5479.06
Rbm33	1954.4	1683.16	1792.39	1919.24	1486.07	1985.92	1790.03	2005.2	1899.77	2117.96	2067.33	1811.4	1810.87	1367.16	738.453	798.852	1543.96	2362.77	2251.42	1286.03	2462.74	1965.39	1557.87	1028.61	1354.6	1432.79	2248.91	1720.33	1425.06	1401.4
Calcoco1	2519.49	2201.93	2839.99	2835.15	2130.91	2140.04	2026.72	2269.94	2561.55	2379.68	3331.37	2305.59	2702.91	2692.48	2296.56	2485.26	2732.95	3092.75	2934.65	2729.57	3139.6	2603.45	2829.72	2638.79	3392.4	2824.3	2971.08	2704.26	3271.4	3615.31
Ephb6	7282.19	5075.52	6131.32	4776.65	6062.63	4816.2	4371.9	4985.55	5080.77	3295.93	6189.52	5679.13	5311.34	4292.47	8606.83	5997.17	5544.85	4657.41	6196.57	4597.88	4897.43	6522.82	7128.16	3557.64	7014.67	5441.79	7640.01	5725.73	7012.11	7445.2
Fhod1	1623.16	1185.19	1434.4	1245.4	1487.09	1442.5	1402.27	1442.49	1645.51	1246.62	1148.59	1173.54	1493.98	1518.37	960.275	1201.88	1801.48	1423.43	445.313	804.741	1495.59	1825.55	1169.63	976.814	629.084	710.88	516.662	723.876	963.925	1217.54
Eprs1	36728.3	35811.9	35935.3	37010.2	35580.3	34988.6	35058.4	35518.8	32563.1	36304.9	31132.6	30556.2	31588.3	33060.6	29242.1	26886.4	34087.2	34440.2	37068.1	36751.9	37831.9	38880.2	29752.4	30861.9	33644.3	33406.3	36365.8	35608	34168.9	34206.8
Rfc1	1469.75	1757.77	1416.44	1784.53	1443.42	1638.31	1478.45	1746.25	1741.26	1074.59	1379.43	1673.54	1585.16	1469.9	1661.77	1205.22	1556.27	1304.07	1783.26	1304.97	1991.07	1780.82	1542.96	1500.43	1842.44	1755.01	1936.38	1778.32	1663.34	1202.02
Elac2	3909.02	4292.87	4651.22	4272.76	3934.02	4674.86	4332.01	3894.25	4132.46	4091.48	4161	4695.93	4393.23	4496.17	4833.39	5017.61	5492.67	4565.81	3962.45	5406.14	4454.91	5026.78	4214.49	3578.7	5261.98	5192.57	4816.92	4288.88	4379.68	3735.09
Vma21	4401.04	3045.16	4244.42	4079.85	3090.88	3588.32	2976.34	3499.18	3089.08	3628.11	2221.81	2863.13	1358.18	3273.62	5097.44	4922.82	3963.01	2028.04	5315.4	5879.2	2243.95	3126.68	7872.16	5966.69	3913.24	4755.33	3893.35	2823.8	7189.64	6087.69
Pglyrp1	NA	NA	459.912	NA	NA	NA	461.789	NA	NA	NA	NA	NA	NA	NA	NA	NA	158.905	1161.01	1370.42	1075.88	NA	1711.49	NA	735.385	NA	NA	NA	NA	667.074	NA
Dnajc3	13309.6	11396.1	12291.7	12125.1	13817.4	13424.3	13098.1	12854.5	13151.6	12209.3	11711.2	12324.7	12590.8	12395.1	10746.5	8674.11	12597.1	13410.9	10151.6	10260.8	12299.1	12622.9	11854.2	11777.2	11097.6	12216.5	11443	12813.9	11797.4	11103
Huwe1	12759	12452.5	13110.9	13002.2	12043.7	12346.3	12531.3	13282.4	12820.2	13107.2	12588	12624	13127.1	13242.9	12211.4	12081.4	12641.8	12524.8	12271.5	12821.9	13711.4	13466.3	11991.3	11298.4	13313.7	13057.7	13581.3	14539.3	13462.1	13127
Htt	3348.09	3465.03	3603.94	3390.67	3853.41	3851.84	3369.37	3461.65	3342.82	3427.15	3612.77	3735.07	3876.09	3139	4532.36	3934.68	3759.78	3179.09	3357.24	3909.42	3402.03	3493.63	3409.69	3215.65	3747.26	4472.26	4050.98	3718.62	3916.06	4210.99
Ptpn23	5901.19	4865.22	5148.88	5290.35	5385.29	5427.36	4112.42	4417.54	4685.3	5100.24	3561.01	4338.02	5097.51	5526.23	3105.38	3775.39	3751.48	3471.51	4616.32	4138.71	4056.25	3668.47	4357.46	4530.65	4218.14	3571.49	3581.44	4472.64	4580.65	4506.05
Foxo3	909.51	540.498	895.255	491.981	938.575	841.104	1034.12	853.589	781.133	633.385	615.087	406.48	974.188	777.628	386.379	510.699	461.209	931.072	1443.16	1110.16	907.15	844.073	804.549	694.128	517.877	1107.73	1073.64	356.619	1344.18	649.824
Rps25	361822	450071	383331	399360	356202	360308	381994	390240	343108	337809	383526	393234	298389	333548	417684	467755	279428	307112	356850	345192	386155	409343	311695	328421	352525	335784	266706	281522	334008	343605
Lrpprc	10803.4	11014.2	10896.3	10663.6	10638.5	10055.5	10378.2	10334.3	9863.33	9905.54	9765.92	10234	10271.1	10211.8	11625	12156	9394.84	9962.89	10258.5	10240.9	11885.6	11604.9	8070.1	7950.32	9531.2	8639.26	7732.73	7922.97	8871.46	8275.33
Pak4	3492.05	2481.04	2313.3	2540.41	2487.13	2216.32	2935.66	2877.62	2737.08	2760.88	2875.15	3116.4	3435.78	2510.66	2542.94	2631.23	2488.22	2369.26	2338.25	1902.27	2628.47	2880.74	3020.18	2161.45	3137.66	3156.67	2991.28	2887.86	2552.18	2362.77
Aspscr1	4314.01	3885.7	3851.85	4222.56	3850.32	4448.96	5250.74	4964.62	5018.84	4205.94	4766.28	5069.7	5053.22	5072.07	4697.96	3621.76	3518.86	4078.08	3358.41	3318.24	3631.31	3961.32	3846.84	3988.92	4124.7	3858.68	4366.41	3904.46	4556.34	4579.61
Pitpnm1	NA	391.517	NA	NA	NA	359.4	374.108	NA	281.806	190.125	NA	NA	NA	509.934	155.924	97.3012	NA	NA	NA	NA	NA	NA	NA	467.747	NA	NA	NA	NA	NA	307.481
Rpl32	98049.5	133783	145976	149276	95656.5	117207	136273	142998	191550	162393	106361	122382	113991	112647	80232	66089.6	114589	92509.1	145587	151461	90784.8	102569	107098	119078	126297	112422	235484	181034	145779	127734
Dimt1	2245.31	2227.79	2560.72	2564.64	2031.56	2965.57	2845.32	3214.14	2259.05	2372.27	2781.73	2716.58	2132.14	2670.73	2439.16	3085.98	1576.47	2121.77	2603.9	2160.43	2162.29	2591.03	2019.69	2489.46	2556.89	2606.82	2676.71	1456.22	1929.4	1940.66
Dffa	3215.58	3436.53	3370.38	3683.31	3458.24	3479.81	2530.82	3147.45	3051.09	3955.33	2572.43	3026.83	3193.21	3281.9	2074.82	2377.28	3961.44	3509.79	3770.13	3057.82	2973.03	3351.04	4048.66	2836.4	3186.56	3526.86	2206.23	3016.48	2648.03	3229.55
Ppp2r5c	10934.8	11853.7	11102.4	11245.6	11682.9	13149.7	11391.5	11841	9508.84	11753.7	12197	14700.5	11369.4	12051.4	15833.9	15748.2	8694.3	10091.3	8687.09	8645.49	10038.9	13752.9	8521.19	10840.7	13633.1	13336.1	6978.88	7851.07	9939.91	8977.33
Lrp1	17736.6	17752.7	17462.2	18235.8	20329.3	21020.5	18304.1	18501.9	19776.9	20554.3	17224.9	17673.5	18271.7	18180.1	13454.1	12312.5	16699.6	16698.4	14071.3	14229.5	14927.3	15151.8	17203.6	17872.4	13791	13034	16104.4	16649.3	15720.5	15468.6
Hadhb	89914.6	89821.9	95919.4	93551.2	84399	82268.5	99317.2	89834.6	90707.4	89562.5	87894.3	88316.6	83200.4	89948.9	91685.8	68357.3	101090	96022	89890.8	97767.8	106266	111126	87934.2	83127.1	84777.3	92998.6	108917	92085.5	93597.6	91806.3
Xpo7	8808.41	8393.4	8665.36	8135.9	8641.78	8754.84	9753.64	10110.7	8984.41	10134.1	9701.66	9908.08	8803.02	9533.47	12090.2	10510.6	7370.24	8337.57	8012.85	8138.03	7991.48	8971.14	7376.97	8082.46	8413.92	9553.39	8551.56	8705.83	9101.38	10232.9
Hspb2	NA	NA	NA	NA	NA	NA	NA	NA	NA	675.231	594.265	1304.65	1232.42	1207.59	1581.06	1671.26	3028.55	1603.31	NA	1766.88	17746.4	18419.2	NA	NA	842.631	1071.48	NA	NA	NA	NA
Polr1a	1851.38	1502.4	2464.99	1315.97	2112.45	1895.82	2085.02	1780.04	1433.34	1394.29	1864.65	1415.43	1882.17	1416.45	2414.24	2456.33	468.244	1719.48	1261.21	1268.42	2354.88	1441.96	1370.7	1440.64	1155.14	2156.08	1844.37	1974.54	2076.79	2284.26
Cops2	15846.9	15667.6	17806.8	15952	17201	17839	15484.6	16712.5	17522.5	18002.7	19688.6	16867.5	18528.4	18049.5	16418.7	11973.8	15882.7	16834.2	14996.6	13910.2	19785.6	15905.5	15578.8	15310.3	17577.5	17514.7	14830.8	14515.5	18153.7	15492
Eif4g1	61148.6	62073.4	66525.1	65205.7	62567.3	62206.7	64471.1	65948.2	60522	60077.2	53230.7	50376.2	58906.2	55999.6	47416.8	43223	63614.2	66582.3	62116.8	68210.4	59859.5	63197.4	57991	60131.8	66642.2	65646.5	65421.2	63302.5	65678.1	66785.5
Olfml3	7569.64	8416.64	7206.08	6469.13	7145.65	8223.9	7481.83	6827.82	8261.71	10267.5	6335.01	5617.91	7170.27	8727.6	6571.3	4938.37	4998.97	6834.76	4085.96	4610.56	4676.46	5016.28	2082.16	2477.79	3343.1	1899.29	2129.3	2436.06	2085.86	3054.4
Commd9	1969.12	718.389	2057.89	1771.88	1645.86	1182.72	1371.46	1196.09	1530.75	1134.07	1225.96	1208.48	1635.22	1459.02	2245.92	1251.64	1184.29	1686.76	1512.27	1944.7	836.476	879.376	2892.03	1844.89	2034.97	1226.18	607.03	592.957	2531.73	2006.62
Sdr9c7	57854	58046.5	69255.8	75679.7	43124	45611.9	78639.8	82193.5	61362.9	58828.1	99093.2	99742.3	82616.5	87989.8	105793	97824.7	60643.4	59133.6	118047	121148	94425.2	89852.3	68240.3	73526.5	90425.9	84520.4	107174	108912	105772	102128
Dctn3	10206.6	10329	10744.1	11958.2	10451.1	10316.2	8521	7960.79	11494.3	10781.3	8606.14	8782.96	8761.94	9047.04	17258	16347.8	7701.15	6721.33	19334.3	19460	7651.31	8537.73	12187.1	14115.6	7192.66	8524.37	6511.57	6012.55	21350.7	21300
Apob	6465.93	6629.16	5935.23	5948.92	7255.8	8283.54	3868.52	4031.77	4183.47	4728.98	3623.1	3921.13	4349.85	4616.07	3308.16	3347.91	4698.67	5036.13	5044.78	4840.8	4130.57	4350.1	2734.1	2522.65	2904.72	3242.98	2847.72	3044.89	2808.42	3021.4
Ttc39a	443.01	752.931	697.837	600.135	246.505	269.205	569.529	304.715	512.874	356.899	422.555	478.208	279.278	564.711	NA	NA	1400.69	1220.27	1305.67	482.113	593.844	NA	NA	346.377	830.936	477.385	1171.88	874.691	966.255	221.283
Isca1	1284.46	1073.43	1409.78	925.136	1404.41	1600.27	918.058	1026.97	1329.11	975.507	869.076	829.344	1542.65	963.168	1388.34	1187.01	1065.85	957.145	465.415	1084.79	1150.6	1421.32	1219.65	1010.86	815.288	949.46	777.433	745.218	1548.12	819.859
Lemd2	7562.04	6435.5	7277.44	7583.14	6693.2	7141.81	7172.52	7386.82	7709.77	8027.25	6954.6	6237.39	7640.48	7679.92	8385.52	7184.56	9573.13	10118.2	6665	6581.25	9399.26	8256.56	10173.1	9282.31	9862.97	10146	8616.22	8715.78	9087.88	8204.76
Acsl4	2968.79	3148.31	3370.39	3262.46	3504.4	3210.59	4987.92	4940.98	4076.83	3967.21	4085.33	4009.23	3883.96	3430.21	1966.02	2615.18	4042.69	4282.79	3055.66	3213.01	3510.75	3925.58	3177.11	2598.16	4385.29	4001.08	4420.51	4623.37	4007.7	3712.01
Tubb6	22344.9	19243.6	18855	19589.1	30906.6	28827.3	18093.2	17944	24385.1	22545.1	20825.9	18057.9	26312.7	26855.2	10219.4	7727.77	20842.5	20509.5	19399.4	15626.2	23798.6	22015.6	24131.8	25379.6	16606.9	14641.2	17459.2	16236.2	16456.6	17094.8
Akap13	4447.19	4005.15	5362.88	5384.26	4712.9	4599.88	4208.21	4503.5	4163.53	4955	4235.1	4315.65	4647.98	3907.53	2394.44	2491.94	4040.61	4257.5	3475.14	3421.17	3947	3398.37	4822.24	4937.24	4529.29	4645.48	4885	5502.31	4279.77	4376.86
Atp13a4	148.76	NA	NA	NA	NA	NA	NA	1064.51	NA	NA	NA	NA	181.119	NA	506.458	NA	NA	NA	NA	NA	145.31	NA	NA	NA	143.219	207.758	NA	NA	NA	NA
Vangl1	1658.89	1645.04	1731.57	1680.89	1411.1	1658.56	2212.91	1607.94	1625.71	1441.59	922.852	1385.52	1329.94	1530.31	1101.64	1473.97	1809.18	1655.47	1264.53	803.697	808.263	1524.74	1182.25	1406.82	2331.28	2199.76	1657.31	1552.43	1433.13	1327.8
Dph1	1536.7	1384.09	1212.49	932.819	1883.25	1454.97	1219.29	1315.79	NA	1232.27	981.215	1206.89	1091.29	1066.17	1293.5	1439.91	2185.67	1231.04	1316.22	1687.84	550.052	1058.96	799.961	1295.16	1038.65	1460.08	1463	1702.78	715.154	1427.35
Gltp	51527.8	59763.8	61529	66560.9	51595.1	52542.9	51459	66709.3	64405.3	68743.5	47278.8	60831.4	53932.3	61273.4	55940.9	62422.3	22812.3	24926.2	56399.3	61847.8	37820.6	36885	47054.6	45394.1	35279.3	34778.2	16098.6	20012.3	86253.3	89428.8
Cdc23	3981.79	3628.49	3755.74	3387.49	3199.63	4300.37	3306.91	4431.84	3637.22	4429.71	3971.09	4442.61	3428.31	4432.01	4220.22	4445.7	2012.02	3671.89	3559.2	3229.49	3200.95	3848.54	2831.52	3256.1	3791.69	3741.62	4125.62	3872.9	3485.23	3336.97
Nagk	8425.58	7935.73	8129.09	7273.1	9840.15	9461.84	8407.4	7722.56	10311	8764.04	8937.37	10764	8999.83	10903.3	8248.87	8671.55	7531.8	7764.27	6028.04	6571.32	8975.29	7534.56	8083.02	8512.64	8676.26	8605.2	9500.24	8998.51	7974.76	8483.34
Sbf1	3757.68	3509.55	3973.48	3687.07	3499.35	3299.82	3878.35	3506.72	3059.21	3514.56	3333.06	3260.77	3183.77	3213.42	3348.19	3225.53	2824.26	4054.61	2642.38	3399.25	4073.6	3965.08	3256.99	3705.24	3831.08	3926.98	3705.94	3771.07	3240.36	3358
Sqle	2729.79	2718.3	3522.98	3532.08	2689.43	3112.97	3771.21	3948.46	2979.65	2614.94	4391.72	3655.45	3521.96	2858.05	2631.67	2570.1	2979.6	2654.68	1040.19	2800.37	4018.14	2943.97	3101.64	2551.45	3480.16	3242.87	2639.45	3514.1	3139.95	2719.89
Cog6	6172.1	5661.69	5205.54	5136.81	4853.49	5735.49	4898.67	6062.38	4339.05	5071.12	4699.91	4748.43	5173.55	3677.47	4447.87	5089.78	3158.67	3311.15	3463.1	2543.32	4384.59	4447.82	3474.93	4609.11	3445.41	4552.62	3390.66	4182.53	4226.46	4545.71
Utp6	4368.06	2182.57	2666.14	3325.82	2191.53	2583.97	3048.88	2996.14	2755.96	3157.1	2924.48	3171.06	2797.78	2922.2	4918.7	3922.79	2948.66	2874.17	3218.85	2941.81	3399.17	2907.18	2744.55	3412.36	4194.73	3795.89	2725.14	2993.97	2633.1	3297.58
Myo5b	2594.82	2438.01	2935.82	3272.77	2143.34	2001.32	2395.21	2639.9	2170.85	2202.07	1729.84	2195.18	2285.81	2240.97	2235.74	1614.88	1795.01	3100.42	2385.55	2432.73	2714.19	2744.5	2223.97	2850.16	2638.32	2414.87	3249.26	3506.83	2747.79	3030.72
Elp1	6064.59	5871.58	5931.66	6461.47	5048.48	5985.44	6009.4	6873.95	6307.44	6134.46	6001.22	6334.34	5472.99	6276.7	5949.45	5859.13	4999.41	6147.51	5290.51	4064.69	6020.27	6075.8	4763.73	4522.37	5500.77	5751.51	5274.61	5692.56	4628.27	5283.98
Septin8	43504.3	42186.1	46512.9	48035.3	45111.2	44789.9	46672.2	50864.1	52537.8	48900.8	43463.1	42309.6	44839	48841.7	33488	35953.4	46820.9	47988.6	38243.1	35454.2	41671.3	45162.6	47109.4	39292.6	49278.1	47751	56023.2	62949.7	51126.7	48259.5
Ctnnb1	23973.2	24626	23055.4	23338.6	22237.6	22184.5	25348.3	24076.6	25645.1	24147.8	23801.9	24123.8	21989.9	21354	26389.9	25874.4	25491.7	23842.4	27444.7	27556	21805.1	22671.2	23570.6	19372.2	24521	26873.7	25217	28931.7	29175.6	27664.5
Icmt	NA	NA	166.825	NA	NA	NA	NA	NA	NA	NA	NA	NA	NA	NA	NA	NA	NA	821.981	NA	NA	NA	NA	NA	NA	NA	NA	NA	1407.21	NA	759.639
Nefh	5634.5	6401.08	6195.22	6787.15	6298.14	6198.1	6915.52	4672.54	6406.57	5616.64	6396.36	5719.7	8954.31	8134.11	8139.75	6358.93	21905.7	18487.1	12661.3	13496.6	17604.2	12942.6	10635.6	10746.9	7232.18	6777.43	12304.4	13610.4	8288.21	7213.82
Ilvbl	4469.09	4306.13	4840.26	4526.02	5070.83	4499.99	4959.43	5090.62	5458.31	5860.05	5057.46	6129.91	5584.68	5450.43	5483.33	6128.15	4691.8	5359.23	5615.39	4495.33	5835.13	5985.66	4362.73	4772.76	5153.17	5242.73	7010.42	7108.19	6664.69	6629.91
Pld2	4154.72	3682.04	3271.04	3531.94	3395.59	2870.85	4364.5	3926.66	3325.52	3818.21	4273.15	4731.09	3741.18	4246.23	4523	4471.16	3559.03	3367.6	3786.76	4489.09	3899.65	3702.05	3317.29	4037.72	4054.29	3748.96	5199.07	4825.83	3993.4	3834.73
Rbks	1016.27	712.505	1147.66	785.79	1077.84	654.699	1108.62	357.173	884.485	270.033	836.545	399.593	1008.58	592.386	419.253	330.621	676.874	699.53	753.847	408.365	712.896	1083.85	1153.69	428.307	899.247	593.66	989.834	565.508	361.848	532.322
Jup	442564	489756	562911	541700	448100	439636	478165	435185	442452	455633	414504	439498	350124	393958	563782	517757	494794	457654	699668	731053	502303	543124	485216	515416	564349	567658	671574	598794	688871	642256
Ap1b1;Ap2b1	32003.9	33795.3	28586.7	30865.8	30451.9	35110.3	27760.7	32101.7	30840.9	32890.6	26078.5	27921.3	29858.1	32235.4	19391.9	24174.9	32400	31371.6	33587	32449.7	29075.7	29966.1	34130.5	37306.6	30571.7	29525.9	29335.4	31941.6	27740.3	31541.4
Coq8a	790.309	1140.68	NA	1272.16	1360.41	1792.45	1186.24	1682.21	1629.92	1577.07	1362.62	1389.03	1174.81	1468.07	2779.25	2196.23	2057.31	2053.04	1840.06	1657.34	6285.92	6047.22	1240.27	1336.86	1412.22	1367.15	1104.8	NA	NA	1717.42
Fasn	92954.7	100482	105841	104641	110163	114344	121348	116367	128418	129964	109978	107620	124971	128401	96043.5	92684.6	106507	106964	104645	106799	101738	106332	82102	81520.6	97555.2	94226.2	116565	117462	112780	112013
Adprhl1	NA	NA	NA	NA	NA	NA	NA	NA	NA	NA	NA	NA	NA	NA	NA	NA	NA	NA	NA	NA	1959.55	1525.69	NA	NA	NA	NA	NA	NA	NA	NA
Appl2	10453.7	10313.6	10570.3	10112.5	10934	11196.9	10945.5	11943.6	11771.4	12096.9	11914.1	11505.8	12487.8	10690.8	10155.7	9710.94	8859.61	9911.4	9213.08	9625.14	10015.6	10133.5	10241.7	9441.96	12591.4	11639.2	13579.7	13963.2	13202	13595.5
Mylk	20430.7	20623.8	22675	22556.9	25760	26274.2	18714.3	19880.5	27429.2	28291.7	22355.1	23069.2	35823.5	39674.4	28057.9	27861.7	55207.3	48374	18441.7	17590.7	22995.6	22881.5	35440.1	40160	19024.1	20444.2	28054.6	24153.2	25333.5	29596.7
Cog5	8944.82	7941.81	8156.78	7466.12	8358.51	8475.07	7931.35	8937.68	7644.44	8839.39	7337.54	8238.4	8333.6	7379.52	8019.24	8309.48	4923.61	7743.55	7051.59	7424.19	6845.6	6837.41	6524.4	6504.5	7801.27	6824.17	6815.7	6485.11	9097.55	7856.44
Hspa12b	5636.65	6177.17	6629.47	6841.21	7646.32	8918.05	8010.02	8500.5	8647.54	9732.42	9065.17	9138.6	9268.82	9331.8	5917.53	6114.3	6464.27	6207.43	3324.45	4078.69	5791.6	6393.9	5190.04	4952.6	4228.21	4899.9	7209.67	7704.91	5498.13	6005.92
Il18	3098.48	2294.38	3871.46	4743.03	2969.24	3752.31	3441.25	4631.68	4155.16	3598.74	4376.39	4940.66	4378.89	4019.25	4504.35	3582.82	3314.27	3412.24	4123.21	5165.68	6985.52	6740.41	2730.46	2917.73	4789.19	3757.21	5588.93	5606.91	4326.45	5757.28
Nipbl	4121.96	3647.48	4433.12	4532.02	4381.23	4078.04	4474.95	4468.81	4731.69	4528.77	5742.79	4192.92	3949.03	4357.95	4661.82	3981.98	4017.59	3716.1	3386.05	4067.2	4159.08	3964.3	3308.36	3860.24	4461.75	4512.33	3959.45	4249.69	4499.81	4361.7
Palm	11442.6	9669.48	10600.5	9494.22	11682.9	14430.9	11299.3	9665.85	12314	11827.1	9877.97	11322.4	10729.9	11280.4	5641.94	5540.77	13337.6	11739.5	7243.39	8386	6320.94	5849.09	10994.9	11310.3	9150.99	9618.05	10208.4	9188.16	9130.63	10247.1
Abcf1	24030	23052.1	22878.6	21431.2	20400.2	22272.1	21291.6	21778.8	20495.4	18116.7	18864.1	17431.1	19458.9	19231.3	17356.2	20632	23310	23847.9	21001.8	24008.5	24363.9	22382	18717.9	21115.8	22728.2	24591.4	23998.6	24802.2	20186	19015.8
Cdv3	19103.8	18778.8	15334.2	18685.7	17706.5	16480.5	17337.9	17558.3	16783.8	17331.4	15381.2	17495.2	15532.9	13170.8	11983.8	13420.3	16901.1	18271.6	14466.1	15398.1	17305	18627.6	13647.8	18214.1	19713.5	19441	11316.9	12212.9	18207.3	18981.2
Eif4a3	44014.5	45146.4	47606.1	45238.5	41261.1	41310.8	48890.8	47552.7	44230.4	46329.8	42275.7	40230.9	45112.8	41890	30533.6	36477.1	42950.8	42187.4	42600.1	44470.2	47442	43222.9	44859.5	44228.6	47895.1	47391.7	49876.8	49251.1	44971	42835.8
Lsm5	9466.26	8750.64	16306.1	11350.8	13841.3	12181.9	13810.7	10807.2	16227.5	14249.2	12097.7	13613.7	10725.2	12045	8494.29	6578.83	14847.9	12949.1	11085.5	16267.9	9588.79	11974.4	17472.1	19037.8	17307.2	14191.2	16963.6	11071.3	19959.5	13792
Acaa2	120388	112679	121609	128676	114000	125545	125699	129579	124223	133837	129678	119873	125526	129597	94796.6	85613.4	123082	135178	119448	132236	123683	127277	133507	115319	121153	107008	115981	136770	128705	138008
Psma2	49392.1	50008.2	49196.3	46692.1	52699.3	54220.4	48430.8	46194.4	57464.8	56944.8	48359.6	59315.9	50746.7	60547.2	43459.9	42580	53323.2	48348	71657.6	67794.6	49826.5	54349.8	40990	45960.8	35851.5	38970.7	66777.2	66547.6	58122.4	56053.9
Gatad2b	5644.45	5522.91	6697.3	6085.46	6049	6289.17	6112.75	6052.6	6340.84	6300.19	5403.77	4894.86	5697.4	4349.18	3465.42	3815.51	4041.32	3542.99	4411.23	4425.98	4086.95	3693.59	5274.92	5698.85	4500.79	5862.42	4982.35	4851.91	5895.24	5893.87
Vrk2	6893.44	5879.94	5939	6434.06	6058.18	5256	6379.38	6207.24	5050.14	5749.03	6199.74	7039.21	6507.19	4736.41	5057.57	4787.67	5885.84	5913.89	5562.81	5491.6	6441.82	5459.22	6902.27	5056.72	7848.79	7630.16	6862.31	6772.43	6153.21	5782.9
Wipi2	4447.74	4726.93	4161.39	4977.68	5273.34	4614.37	5071.63	4411.56	4740.45	4846.66	3820.23	3766.76	5229.74	4750.75	3244.33	3764.1	4978.38	4013.98	4425.81	6064.99	4758.13	5724.42	4508.84	5711.41	5114.77	5202.75	4422.74	6166.46	5955.18	5581.24
Cyc1	24573.6	23320.4	17770.8	20016.1	22657.9	18388.1	21419.9	20881	19417.5	21728.8	23851.8	28329.8	16680	25676.3	30303.6	27760.3	25442.4	25640.4	22350.1	23607.2	30623.3	31737.2	18227.3	22579.3	24669.3	28820.6	14601	17455.4	23291.7	22752.4
Thumpd3	6340.49	5484.84	6408.06	7789.7	5225.74	7910.98	6919.48	7472.5	5920.66	6652.62	7239.78	7655.98	7485.25	6548.85	9313.73	9467.37	5956.01	7472.92	7317.71	8308.86	8827.45	7645.77	6807.94	6989.32	7151.56	8098.11	7081.98	8626.57	6647.86	7527.8
Unc45b	NA	NA	NA	NA	NA	NA	NA	NA	562.441	402.401	561.987	668.237	451.688	756.422	404.938	NA	NA	424.961	NA	NA	1271.76	1652.38	NA	NA	NA	NA	NA	NA	NA	NA
Elf1	1519.96	2133.19	1491.95	1301.5	2297.17	1640.92	2059.5	1652.18	2332.56	1294.02	2061.71	2149.2	1376.14	1480.58	1802.99	1289.86	808.063	1371.67	1308.86	1139.13	1271.29	1143.83	810.39	2074.47	1361.48	1496.66	1346.06	1297.47	1548.75	1062.93
Ftsj3	2697.63	2633.94	3028.65	2811.2	2292.36	2598.31	3059.49	2537.19	2232.42	2703.5	3248.29	2967.61	2726.83	2735	3145.58	2337.29	4070.61	3264.34	3542.34	3218.84	2135.78	2255.65	2845.19	3219.53	3887.54	4199.11	3336.35	3292.27	3163.64	3193.86
Nrap	NA	NA	NA	NA	NA	NA	NA	NA	421.269	407.493	425.058	428.128	NA	296.536	518.565	NA	NA	437.008	NA	NA	3124.19	3000.03	NA	NA	NA	NA	NA	NA	NA	NA
Hyou1	26343.5	27962.6	26669.3	28743.6	28035.3	27605.2	24904.7	27577.3	24298.9	24868.2	25888.6	23668.5	25711.9	25263.6	21193.8	18382.9	24494	24481.7	25114.4	23914.3	23120.6	23257.4	27317	27162.3	26578.6	24701.3	26034.9	27079	25688.2	25898.2
Fundc2	17239.7	14404.4	14373	17167.1	12750.8	17469	15773.3	16610	15843.2	18393.5	17775.7	16906.4	20290.9	19512.8	16315.3	14016.4	13157.6	18662	16761.2	14341.2	27389.9	23197.9	19681.9	16652.5	17316.4	16449.2	14283.6	14432.5	15785.9	17755.1
Cdk9	2706.56	2016.28	3065.23	2008.11	2693.99	2293.78	2861.11	2600.77	2865.54	2014.44	3192.26	2169.21	2347.04	2283.1	2853.68	3350.69	3150.02	2520.63	2180.79	1929.38	2450.45	2381.9	2939.02	1864.01	2865.79	3278	1762.66	1810.87	1580.35	1851.66
Stk24	22507.2	25063.4	24342	28943.4	24952.9	28224	27276.2	27231.3	23049.8	24662	29494.7	28868.9	25448	26904.4	16981.1	18686	27191.5	24867.9	23142.3	23451.7	26029.3	25483.1	26567.4	24827.3	24721.4	24326.8	24724.6	26351	26267.6	24288.4
Stk25;Stk26	7557.18	9373.17	8296.96	8562.68	9258.29	8146.51	8293.69	8377.25	8593.53	9751.12	8957.44	8876.97	9084.42	9583.42	5919.94	2787.56	8860.02	10394.5	7400.6	9458.46	7669.42	6900.8	8489.68	9640.68	9033.52	5064.68	9356.16	9880.65	7345.95	7672.42
Lyn	2691.14	1954.92	2140.43	2562.05	2492.45	3034.8	2585.14	2436.07	2401.13	2652.18	2774.71	2200.07	2101.16	2324.34	2190.6	1414.46	3179.69	3056.5	2222.49	1524.87	3453.87	2544.83	3695.13	3017.36	2448.29	2790.77	2818.34	2324.4	3007.24	1734.69
Tfap2a;Tfap2b	4044.8	3683.8	2644.86	5721.79	3746.21	4367.05	5276.01	5033.25	3872.28	3693.05	2311.86	4076.32	4530.52	3164.73	1781.82	2271.45	3371.04	4882.67	5846.42	4203.89	2240.43	3506.74	2471.47	2539.28	2574.28	1757.82	3263.17	2860.77	3397.77	6060.44
Hip1r	15080.7	14318.3	15406.6	15819.3	12723.2	13176.3	14301.7	14619.3	12930.5	13829.9	14673.1	13743.4	12575.5	13260.7	14598.4	14015.6	13817.9	14132.8	14554.8	15501.5	15334.3	15534	13735.2	12621.2	15030.8	14785.6	15783.5	14895.4	15394.6	15433.2
Smg8	1264.23	1183.88	1245.91	1305.5	1306.2	1260.93	1519.59	1297.35	1491.7	1199.11	935.203	924.352	1270.76	1195.52	498.395	943.824	951.198	1166.31	1054.28	926.613	1100.3	1539.3	964.98	1044.31	1135.09	1059.89	1534.02	1229.22	1000.83	1437.79
Tmem43	113443	101510	109697	112824	93776.4	96619.4	93500.1	90193.9	80629	79523.9	83023.5	81872	81825.3	77663.7	98973.7	102411	128371	111756	105029	122922	122287	119234	116874	100578	110508	109563	129751	121149	108807	111469
Dlat	33232.2	39960.3	38529	36887.3	38248.3	38235.1	37149.6	39057.3	40418.7	42523.8	39701.3	45445.1	36721.5	38990.5	49458	59297.6	38497.2	40186	33244.2	40168.5	45316.8	59203.2	29386.5	38126.1	38366.3	40861.4	31488	32365.3	32564.5	40263.9
Cebpb	3633.96	3725.84	3561.28	3696.7	4573.04	2995.59	3113.34	3036.52	3739.37	3231.16	2477.75	2662.97	3021.3	3226.42	3984.69	1389.49	2117.7	2383.83	1292.89	4446.02	2117.43	2284.1	2037.9	1654.96	2020.78	1390.41	943.379	687.793	2706.96	799.88
Gbe1	8389.1	6674.47	7546.47	7780.78	8533.52	9402.15	8175.43	8422.37	9113.61	9573.85	9473.12	9333.46	11288.6	12042.2	9160.52	10290.5	11089.1	10492.6	7380.97	10037.1	25618.5	21186.4	8470.76	8706.18	8939.2	9638.13	9017.77	7882.74	6994.87	8679.04
Thoc3	4448.95	5058.1	5155.28	5941.96	4516.7	4052.88	5584.57	6324.45	4592.37	5187.54	4095.97	4775.46	4801.8	4362.09	3439.57	4516.1	4170.19	4259.8	3979.78	3995.59	4596.77	4475.6	3476.12	4548.53	4869.29	4364.61	5573.57	4761.56	5413.27	5533.25
Gamt	1897.24	1126.83	1611.78	1592.28	3346.4	2303.72	2323.05	1726.53	3088.3	2171.66	3298.17	3443.53	3288.9	3746.31	2628.81	2748.81	1721.69	1469.29	1058.95	1926.83	1961.01	2425.89	930.429	1939.31	951.005	1371.4	1253.43	1108.18	3159.81	1456.03
Pgls	17862.3	19336.7	25477.9	26486.2	23812.4	24466.6	18556.1	21220.8	27768.8	24817.1	16785.3	17949.9	26178.5	26784.2	16737.9	15337.9	17902.7	20967	33684	27659.4	15522.8	14544.1	25078.5	31221.8	16367.5	15165	8461.34	7822.39	38475.9	37796.6
Acin1	14785.5	16228.5	15512.3	15413.7	12969.5	15456.4	15558.5	16879.2	15741.9	15250.2	15128.4	14401	15559.2	13636.1	14817.8	12672.7	13826	14210	13722.7	13489.2	13648.4	14729.5	13645.2	15076.6	18506.3	16583.7	15397.8	13774	15515.5	15650.1
Arhgef10l	6238.29	6689.59	7022.89	7227.1	5719.93	6081.54	7713.05	7735.82	6779.96	6491.52	6814.29	7156.42	6218.11	6581.82	8893.76	6732.68	5257.41	5862.22	5421.72	5978.7	7367.71	7674.31	5576.67	6084.96	6867.99	6538.78	7075.72	7113.53	7418.16	8162.73
Ddx27	3262.01	3197.44	3220.69	2820.99	2890.8	2486.29	3368.5	2736.67	2608.7	2780.23	3479.68	3293.17	2835.61	2802.9	3119.14	3656.81	2896.1	3337.79	2694.64	2594.02	3359.07	3444.28	2572.7	2893.7	3534.95	3466.35	3128.87	2852.55	2550.42	2403.93
Nptn	29670.4	27229	26243.9	28480.3	27031.4	26014	29233.6	28802.9	27669.5	24600	29235	34826.5	28547.6	30054	32021.3	30691.6	21023	23276.3	30538.6	27935.1	35933.2	36267.1	35140.8	30857.1	29972.2	27812.8	21761.5	28178	26794	34918
Traf3ip2	NA	NA	NA	NA	NA	NA	NA	NA	NA	NA	NA	4663.8	6643.8	NA	5581.77	NA	NA	9711.23	NA	NA	NA	NA	5568.56	NA	8361.23	7591.94	NA	5195.46	7314.78	NA
Thoc1	15006.7	13693.4	13996.3	12620	10586.6	13190.6	16129.9	16675.6	12466.3	14251.5	14201.1	13889	13640.8	13637	16498.9	14328.6	13118.6	15070.4	15393.6	14715.1	13867.8	13718.7	13997.7	15382.4	18703.3	18325.5	12055.4	11715.6	14926.7	15246.5
Mocs3	6784.04	4866.18	4141.53	5807.09	4344.68	4431.44	4853.53	5144.86	2693.22	5046.73	4915.93	6787.19	6011.21	4800.74	3470.75	3591.14	3045.2	4877.69	6139.69	4434.84	4922.07	3691.01	4493.05	5310.12	4376.08	4972.45	5338.36	5752.22	2388.38	4742.06
Faf2	13216.9	12276.3	13803.2	13158.3	12707.6	14464.5	14015.6	12900.5	13447.1	13876.9	12521.3	13002.6	11642.5	12780.6	11046.7	7248.56	15718.8	15244.8	12997.4	11886.7	14782.6	13180.2	13627.2	11715.9	14278.6	12569.9	15569.2	14205.8	12010	15108.3
Nhp2	11549.3	11902.9	10802.2	9129.1	9285.6	11470.1	11754.9	11021.3	10142.8	11853.8	11230.5	14370.4	10114.9	9388.59	10163.8	9236.13	9322.2	7057.47	6816.26	13682.4	9870.78	6445.06	6851.7	8814.99	4469.45	12941.9	6962.9	6120.33	18622.7	11783.9
Fundc1	NA	NA	NA	NA	NA	NA	NA	364.671	NA	NA	421.189	NA	NA	NA	414.401	NA	NA	NA	NA	NA	NA	NA	NA	NA	NA	NA	NA	392.174	NA	380.349
Rnf25	4089.39	3723.46	3410.02	3992.33	2832.39	2988.65	3515.33	2351.26	3701.42	3394.59	3051.46	4192.41	2994.03	3215.3	2628.44	2938.02	2864.24	2654.13	2962.29	3408.31	3826.45	2228.38	2307.38	3842.99	3311.25	3364.93	3286.99	3695.51	4183.7	3388.4
Ngdn	830.056	1347.08	1596.52	1774.33	1130.53	813.6	1239.96	1199.96	949.941	1334.31	1419.59	1033.88	1404.58	1349.27	902.162	1240.11	1892.29	2160.87	1158.8	1276.02	1261.82	991.055	1497.16	1219.64	1768.83	1575.38	1837.79	1839.08	1375.2	1039.31
Ppa1	62187.1	56206.5	64899.3	74393.8	60282.6	62135.8	59026.8	64233.3	59025.4	67284.7	53979.8	45077.1	55813.4	61933.1	41676.3	43473.3	61227.5	57090.8	62751.8	65713.1	68924.3	67647	55501.6	50942.2	44349.7	53892.4	47600.4	60215.2	61925.1	66963.5
Hint2	6455.04	5013.1	6148.93	6811.61	9250.33	7128.53	3858.45	6391.7	5721.01	7646.51	5664.29	7236.08	9079.15	7712.6	9881.24	6993.41	4358.67	5338	8682.77	9448	7359.81	3764.65	7691.15	8898.36	6187.23	5422.85	3021.64	3031.45	11320.1	8010.36
Mettl1	3332.21	3013.84	1649.73	2926.68	1560.5	2341.36	1245.01	1424.31	2261.13	2501.42	1010.6	2470.68	NA	2413.16	2442.35	4659.17	NA	2904.56	1976.08	1859.92	NA	2909.89	1343.67	3610.87	3089.61	1665.38	1393.76	2314.62	2047.99	1684.15
Phospho1	4243.54	1970.21	4112.88	3128.33	3912.07	2879.99	4370.04	4560.36	4508.63	2935.25	4685.09	3728.73	5616.88	4787.82	3759.32	2353.97	3929.58	3909.51	3421.75	3452.61	6380.33	5565.27	3381.45	4231.8	3952.53	2785.36	3618.7	2362.41	3433.25	3667.02
Nup214	7662.8	6833.98	7205.15	6250.93	6689.13	6689.06	6586.23	6920.55	6833.26	6076.34	5813.44	5392.41	6710.41	6098.13	4595.97	3854.24	6657.99	6713.1	6675.47	5717.71	5880.39	5698.83	5836.6	6865.84	6972.23	6232.62	7216.57	6793.92	6022.08	5261.31
Pygb;Pygl;Pygm	42093	44954	40246.7	39043.3	44436.1	45905.8	40950.1	41194.3	59198.6	58595.8	55918.7	65834.1	60192.3	65880	72989.5	76429.2	69371.7	66134.4	59438	60206	196471	213080	42300.1	45814.6	49233.6	51743.2	43499.2	44188.3	42740.2	42679.6
Mrpl37	3362.94	4107.81	3500.12	3731.95	3596.85	3403.82	4586.26	3668.05	3299.85	3129.08	3002.47	3397.56	2800.16	3603.34	3254.43	2713.05	2991.26	3395.42	3314.78	2459.87	4060.36	4168.96	2739.09	3323.88	3245.42	3262.4	3847.48	3825.71	2717.43	2951.9
Afm	12706	12095.3	7613.93	10988.1	26560	27720.8	17290	16980.6	16569.6	20584.2	21801.9	22299.7	24935.6	25172.9	10035.3	6759.77	6031.59	8567.96	8407.47	9060.09	5689.74	8233.91	28660.4	28937.9	22708.3	23955.3	21261.9	19907.1	22935.8	22476.5
Pdk3	9138.48	8161.7	7216.5	7879.31	8074.32	8390.75	8703.18	9328.12	8657.56	9165.45	12395.8	11822.7	8350.38	9442.58	12459.9	12221.7	9079.02	7776.29	7167.66	7836.46	7044.29	7580.37	9668.52	6885.93	13600	12266.1	8035.79	6692.83	8864.37	7819.3
Znf592	811.17	1029.15	527.132	624.381	579.326	1161.91	NA	755.041	926.029	621.598	830.474	891.781	625.491	536.451	602.104	848.015	501.92	601.99	725.197	401.058	NA	491.131	482.968	NA	861.748	1025.67	NA	694.32	488.371	744.952
Pzp	40330.7	44787.7	37972.1	36361.6	94359.6	94628.6	34242.2	34324.5	38436.5	41895.2	41441.8	44174.9	43998.8	47474.6	35239.7	35758.7	46633.7	46128.7	49473.2	51087.7	54483.6	57214	63390.1	66039.8	55360.7	53500.4	79409.8	83053.3	73951.3	70729.3
Eps15l1	6487.08	7418.6	6582.99	6357.73	7419.04	8062.71	6531.23	6270.13	7181.32	6529.46	7080.26	6671.53	6643.99	6816.18	6118.67	5515.19	6270.29	5342.54	5452.62	6297.21	5834.92	5748.12	6491.83	7713.71	7130.42	6910.45	5559.45	5151.72	7163.44	6933
Prkag1	7202.27	8364.67	8286.27	8502.62	8477.63	9882.19	8438.85	9560.12	6570.32	9246.73	7781.78	8685.39	7641.52	8717.52	5160.67	5057.49	5188.13	7769.89	7050.03	7913.65	7394.52	8835.9	5507.43	6383.84	7180.65	6682.27	8079.88	9024.83	6605.9	7683.69
Prkag2	738.576	623.946	981.531	950.285	1117.45	988.364	NA	722.927	NA	938.056	954.612	1019.24	1253.94	798.867	1061	1417.73	NA	892.387	NA	1151.08	1142.78	937.79	NA	NA	2143.3	NA	1391.63	1932.33	NA	995.092
Med25	1281.02	400.781	1289.05	1318.74	739.94	942.414	2329.22	1677	1100.38	717.576	790.372	1042.08	796.543	1100.64	853.485	741.662	788.507	895.413	2209.82	463.487	1496.67	1269.79	908.444	1726.57	991.309	465.19	2589.57	1548.99	1039.24	1419.68
Lsm12	9593.92	10942.6	8998.53	11304.8	10703.6	11117.6	11830.9	10319.3	11456.9	11100.4	5097.97	7366.8	8281.44	10021.1	4504.77	4839.49	10851.9	10607.9	10960.4	9040.92	7284.25	10116.5	9565.3	12001.2	9289.03	9586.88	10860.6	12569.8	10393.3	11373
Pxmp4	8484.34	10033.7	9401.72	8237.88	14056.3	10630.7	13460.1	12701.6	14837.8	11778.8	14234.6	13604	11693.9	12925.2	10692.9	8166.87	9606.35	6712	7496.01	5177.21	7552.32	9647	4964.97	9225.7	5530.71	10036.9	7172.6	8397.9	9914.14	7717.72
Bnip1	4755.54	5097.5	5599.52	5144.48	4619.8	4889.87	5207.54	5230.36	4327.7	5208.39	4171.04	3951.44	4263.73	4861.81	3794.43	3631.59	3581.04	3906.98	5302.56	5888.93	3342.63	3555.74	4876.84	5268.25	3272.48	3270.42	2899.07	3454	5337.02	5456.09
Mpst	9698.41	7724.81	10324.8	10779.1	11598.1	11432.2	10889.7	10417	10613	11076.5	10511.8	9642.23	10582.6	9844.08	7914.91	6465.49	8095.18	9565.03	10238.2	11297.3	9707.67	8611.31	12775.8	10651.1	10254.1	9414.3	9605.66	10442.8	10115.3	9609.32
Foxp1	1190.59	1345.94	821.938	956.286	1172.25	1466.04	1267.85	1261.71	1343.14	1011.53	891.483	1022.16	1059.16	1208.57	1298.73	1833.33	1008.8	977.196	1166.67	1325.83	912.278	1289.27	1257.81	553.418	1108.38	946.482	1184.35	1218.64	1377.45	866.867
Nup155	37238.2	35975.5	32710	38075.4	28393.8	34469.1	31381.5	34905.6	33735.9	36546.4	35193.7	37352.4	33389	33244.6	25348.8	30711.5	28534.6	35468	35689.9	39051.2	35687.7	32778.3	30732.8	34527.1	33130.5	34977.4	33639.3	37927.9	35206.5	38723.3
Spon1	27373.5	28510	26437.2	23009.8	27494.5	28269.8	24574.9	24762.8	28691.2	31031.3	20476.6	22442.1	25922.8	29337.8	12703	13918.3	20044.5	21391.8	15616.1	18221.8	17653.4	15345.9	12416.4	14761.8	13288.6	14046.6	14583.1	14543.6	14612.7	14502.4
Utp18	4324.38	4030.12	3730.29	4302.08	2557.68	2621.62	3473.19	3614.36	3687.35	2366.8	3790.84	3576.02	3248.08	4070.73	4992.39	4173.05	5231.53	6497.4	3874.43	3604.86	3840.77	5119.99	3328.27	4208.14	4389.64	6036.92	5458.88	4960.52	4672.64	5033.59
Chmp4c	844.968	934.395	1350.15	394.683	1319.53	1010.59	1119.59	1180.45	1383.45	710.598	1549.77	932.574	766.985	1206.49	1110.13	949.889	1290.25	1057.44	385.845	1244	1260.75	1352.63	1299.39	1923.2	1480.74	1085.09	1000.73	1430.2	1757.26	850.448
Bag3	21658.3	18105.8	18851.7	21448.8	23757.2	22481.5	13050	14782.5	17780.4	18403.4	14648.6	12459.6	15919.3	13660.7	7765.74	9262.77	7992.69	8179.29	9601.32	11973.8	11102.4	8706.73	9961.13	9555.72	8176.26	8879.2	4943.51	6274.77	10038.6	11871
Arfgap1	4003.96	4015.96	3550.06	3225.33	5259.49	4056.1	4014.48	4396.49	3136.91	3848.05	2782.28	3045.19	3738.13	2868.34	2712.97	1987	2431.61	3630.21	3408.11	2111.97	2910.42	3328.69	3300.7	2293.58	2404.42	2856.88	2972.5	2110.49	2517.48	3134.6
N6amt1	525.213	321.51	NA	461.131	394.416	237.195	379.985	162.216	NA	263.441	NA	497.798	564.741	493.753	350.593	305.806	NA	NA	NA	516.243	NA	178.37	NA	NA	NA	318.089	NA	NA	728.948	350.791
Gpn1	971.761	1145.97	763.467	881.128	814.939	816.462	800.695	1084.79	839.296	510.243	1390.78	887.208	867.152	737.21	1040.85	721.002	418.71	1092.38	1526.82	722.428	1238.68	1188.03	1423.24	681.105	1796.02	889.048	1162.31	824.07	946.131	717.43
Dab2ip	1513.72	1074.43	1377.93	1358.21	1035.8	891.573	1100.97	1035.3	1482.72	1166.11	1247.82	989.56	1044.85	1189.36	1322.79	1230.68	1748.16	1302.26	1030.42	231.336	1140.94	1260.07	883.575	1015.39	869.587	1440.37	1205.53	1200.38	879.113	1264.18
Smn1	262.672	334.326	654.762	494.279	546.545	271.636	440.655	466.932	416.788	614.837	566.664	528.007	360.182	587.15	635.177	492.419	524.568	411.777	495.366	NA	562.974	399.115	810.729	NA	NA	685.486	371.038	584.761	301.404	389.408
Capn15	897.264	574.184	367.96	NA	561.427	517.626	342.296	543.33	447.202	647.684	815.649	467.291	663.943	401.651	697.421	480.023	543.027	772.262	NA	NA	609.112	471.567	NA	NA	502.72	888.837	265.891	632.756	NA	651.252
Cryz	4996.97	4208.67	5039.46	5082.29	6114.38	4980.28	4188.42	4761.86	4607.83	6030.79	5172.69	4692.95	7034.67	6071.56	4683.98	4506.77	5836.33	7945.81	5244.29	4283.59	7495.17	5860.85	6417.87	5726.7	6835.46	5831.15	6449.19	6559.11	8247.57	6963.12
Tars3	1132.43	930.913	1152.73	954.423	568.296	1048.82	798.413	1085.62	906.495	1190.51	1300.06	1117.84	1248.59	1195.58	1331.42	1242.61	1138.55	1402.56	839.838	1272.65	1639.01	1635.1	1048.67	1020.38	1276.31	1427.2	953.061	1049.19	542.036	1314.34
Psmd5	23411.6	22402.6	22344.2	25385.9	22865.7	23542	21854.8	22040.4	20529.7	21847.8	21976.4	21165.2	25482	24927.6	16993.9	19220.2	18735.7	18987.8	19162.1	21482	24056	22494.2	19953.6	20535.1	24727.4	21993.1	18134.9	21035.9	21186.6	21929.9
Urod	5913.89	4467.29	5356.55	5956.72	7602.42	7816.74	5098.04	4548.95	6705.02	6311.58	5786.33	6507.31	6890.9	7156.65	3819.41	4742.33	4143.92	4164.56	3697.28	4181.14	4567.94	4497.66	5053.5	5530.78	5634.68	4577.66	3761.43	4061.75	5199.2	5493.4
Tra2b	17384.2	12563.2	14076.2	17309.9	13841.5	13140.7	18044.6	16734.6	14747.1	14684.9	12918.2	14161.4	13775.5	12996.1	12236	10510.2	17988.3	16363	11797.3	14861.3	18398	15472.7	14356.9	14771.6	18031.2	15716.7	14788.4	20359.1	17475.1	17362.7
Tor1aip1	13546.7	13009.2	12528.4	13448.6	13104.4	14118.6	13197.5	8860.72	12495.2	14420.2	11814.8	11650.3	11279.3	11887.4	10709.7	10136.5	12992.4	14978.3	10678.5	10473.8	13801.4	11948.5	15468.4	14012.7	12820.5	11220.5	11669.4	13904.6	16180.9	11383.2
Heatr5b	3260.95	2936.15	3346.27	3308.97	2861.85	2992.65	2917.1	3440.72	2915.93	2731.88	3445.65	3201.17	3151.14	3120.45	3803	2856.09	3108.95	3283.01	3118.86	2704.29	3142.85	2949.94	3492.55	2693.62	3897.72	3765.49	2580.02	3667.7	3339.26	3156.44
Aldoa	514226	547091	473466	472629	473197	487680	408084	396501	552277	577321	449894	452449	682300	693268	472867	442073	701692	654061	709129	686163	909583	975453	663873	755596	527647	521284	529624	530613	625275	615533
Ccdc22	6750.15	6947.7	6607.26	6712.75	6928.55	8629.25	6045.47	6570.57	7177.57	7450.57	7455.56	6101.74	6257.17	6320.57	5920.9	4998.33	6900.53	7094.4	4799.54	5594.59	5673.53	5917.93	5506.21	6410.78	5917.77	5827	4782.26	5524.83	5990.6	6436.04
Dnajc2	5648.44	6003.44	5579.02	6004.83	5888.33	6181.1	6601.04	6548.9	4929.7	5981.28	5802.52	5692.48	6089.36	5444.54	4726.21	5153.79	5383.38	5764.11	4726.73	5775.18	6401.52	5928.67	5604.33	5398.08	5867.5	6247.32	5333.76	5717.35	5455.49	5548.73
Ubr4	10116	10138	10317.1	10031.4	9659.57	10195.9	10102.1	10596.8	9659.31	10165.2	9466.46	9613.61	9538.22	9788.09	10394.8	9750.16	9376.73	9271.8	9991.8	9406	10996.3	10563.8	8987.06	9197.95	10500.8	9891.44	10687.3	11032.6	10355.7	10696.3
Ran	198234	216544	219095	201047	222112	213275	229117	195335	219345	199337	209602	183095	197105	198773	199401	172728	223937	183400	234442	241417	233842	232438	211291	217760	197963	205933	250953	216053	239467	208372
Nfyc	2890.68	3095.72	6561.33	2807.69	3135.89	3355.49	3873.68	3399.02	4364.26	2963.22	3244.31	3522.62	2752.02	3082.05	7470.4	4543.76	1222.9	1423.68	3301.76	2346.66	1955.81	1520.62	2421.5	2507.88	3222.4	3587.51	2408.99	2294.45	2915.76	3098.82
Etfdh	29569.8	31919.1	32031.7	31782.9	29764.8	30135.9	30017.7	32792.8	30396.3	33401.9	32116.9	34080	28954.6	33520.2	25451.6	25787.2	32116.8	36243.6	28611.4	26744.7	37605.7	36862.3	35283.4	30691.6	30123.9	29641.4	32459	32003.3	26027.9	30342
Ino80c	529.223	541.152	559.528	467.369	463.683	883.875	628.498	275.466	680.582	695.65	423.805	428.418	586.369	1021.43	483.587	312.324	381.401	395.132	926.719	539.551	293.241	426.224	360.361	457.395	611.487	475.172	334.697	670.79	577.905	635.038
Eea1	17640.2	18809.6	18445.2	19300.1	19819.9	20578.6	14763.5	15812.2	18871.4	19180.8	14016.7	15727.3	16706	17347.9	8429.5	8961.92	12444.6	12963.5	13918.8	14704.9	10569.5	11418.9	15767.2	15559.1	11489.3	12251.3	13072.4	13296.8	13251.6	13707.7
Hk2	10670.5	9738.46	11037	11030.3	9930.66	9984.75	10215.5	10626.6	9177.6	9362.35	10751.1	9875.67	9707.46	9720.09	9634.15	9708.16	12252.9	12715.3	10749.1	11316.6	27445.4	24998.2	11307.3	10762.4	10984	9640.74	11125.9	10382.2	9941.24	10515.9
Hk1	77347.5	73591.7	55454.9	59478.2	56639.9	58939.4	47999.3	51074.9	56260.3	58986.2	62509	56651.7	74473	70016.4	55748.9	55376.3	64043.4	60863.3	57926.7	57892	47372.2	42481.7	78530.3	76651.3	63347.3	61088.8	59233.6	60172	59647.1	64230.4
Lamb2	37667	38459	42562.2	40002.4	36791.1	33778.8	37591	37863.4	40356.1	39325.6	34840.2	35631.9	39834.6	38341.5	39770.8	36862	52455.1	51448.9	45474.8	45345.2	42471.6	42839.3	37465.5	37115.3	29646.3	29197.8	38615.5	35551.4	37069	35907.4
Acad8	7933.88	7136.18	7885.89	8023.36	8588.6	8204.61	7936.41	8322.62	9332.9	8676.55	8554.51	7385.74	8847.81	9057.25	8137.36	7968.01	6578.64	7723.51	5581.33	6183.39	8833.11	8370.61	6690.89	7155.42	7705.71	7132.74	9498.84	9333.08	6988.1	8120.71
Aldh3b1	1482.22	1313.14	1771.13	2416.64	2394.18	2279.71	2036.55	1955.68	1592.7	2155.23	2832.3	2553.53	2242.36	2212.22	2847.82	2829.85	2149.81	2004.65	2457.05	3225.88	3191.94	3478.77	2050.57	1850.9	1626.7	2027.88	1707.1	1915.57	2210.73	1270.96
Sync	NA	NA	NA	NA	NA	NA	NA	NA	NA	NA	NA	NA	NA	NA	NA	NA	NA	NA	NA	NA	952.224	897.712	NA	NA	NA	NA	NA	NA	NA	NA
Nfx1	685.551	801.158	897.951	891.06	1101.83	667.247	1063.11	742.372	833.078	974.261	1230.35	872.537	488.226	879.323	731.871	838.038	954.273	830.331	1016.58	1554.7	998.854	711.554	799.485	1014.49	1281.34	928.172	972.815	1005.37	1161.2	1032.44
Sh2b1	897.655	858.001	696.051	1215.74	1260.37	940.32	725.743	1205.06	894.902	960.427	919.211	817.228	1092.93	899.458	716.247	606.671	1212.66	918.056	751.858	830.35	634.773	701.096	1115.13	1163.03	797.309	1468.37	873.707	854.521	923.925	927.474
Lamb1	19854.4	18754.6	18433.3	18341.8	16539.8	15371.7	18362.4	17197.8	18390.9	18808.1	15568.1	16811.6	17799.8	18839.8	8763.72	8022.77	13001.6	12679	12877.8	12525.9	9466.21	9824.69	10731.3	10740.5	11163.2	10901.5	10508.4	9330.83	11050.7	10127.9
Txlna	7471.63	4943.92	6246.59	5902.93	7069.89	6663.27	6499.82	6429.63	5848.16	5913.07	5320.93	5618.8	5595.1	5724.01	3305.15	2533.03	4653.67	5581.62	4348.83	3388.76	5687.86	5002.57	4721.91	5510.67	5633.9	5133.47	3907.43	4095.19	4997.21	3868.22
Csnk1a1	53751.4	61026.8	56994.6	56577.1	50295.9	52873.7	54693.1	61586.1	49739.7	52346	63265.6	52497.9	50244.3	50845	60350.5	66594.4	51518.5	52939.4	66325.8	63021.6	66615.2	68752.1	54661.7	52222.7	68350.1	60530.9	73982.9	68750	62023.6	61351.4
Lamb3	31428.8	32207.4	28218.4	27897.3	18968.2	18766.7	25267.8	25154.4	24566.6	24396.7	22502.6	23567.8	20995.5	21016.3	28919.8	26767.8	31534.9	30962.7	40827.4	38107.9	23259.1	24962.2	27920.1	29874.2	34195.2	31637	26942.9	26290	30274.3	28678.6
Ddx19a	17244.2	17222.8	15302.8	18022.4	17917.4	17523.8	14498.9	18743.1	15685.4	18484.1	18226.5	16362.6	17517	17604.3	18668.8	15318.9	17068.9	17145.3	18067	17081.3	15403.7	17429.5	16610.7	16279.5	19602.6	16600.4	18427.8	20062.6	15779	17844.4
Slc16a1	14339.5	14167.8	12585.6	16281.3	16057	18520.7	14272.5	17427.2	17590	20643.4	14769.5	15829.2	16197.5	17391.8	17254.8	14280.9	13969.5	16746.9	14537.3	15369.4	15421.9	18131.6	14475.9	17667.5	19365	15603.1	13992.2	19610.9	15600.7	15002.1
Clip1	21105.6	21714.1	22075.1	22145.8	20545	20604.2	17506.9	17666.1	18214.7	18266.3	16718	17172.4	15748.5	16927	12043.3	12475.5	18225.9	19250.3	19661.8	19054.4	19347.3	17648	19968.5	19683.3	19238.4	18379	17005.1	17920	20166.6	20339.7
Vps53	5873.32	5873.15	5398.33	5795.11	6360.77	6278.17	5646.32	6091.08	4941.32	6291.14	6543.5	6526.28	5149.71	5163.59	7591.94	8240.66	4257.8	4952.99	6583.36	5207.97	6028.06	5161.13	4170.15	5013.23	6684.2	5821.51	5683.42	6011.15	5866.48	6846.41
Rars1	57098.6	56353.5	66536.2	58360.9	59183.9	55516.4	60805.5	57009.3	59477.5	58829.9	56167.6	54259.7	56191	55641.2	62102.8	62593.6	53547.7	53237.9	63445.3	61730.2	66846.6	66116.4	50901.4	52504.3	58399.2	57956.3	64858.2	61628.3	59940.8	57227.8
Agt	3431.19	4230.64	4450.34	3191.03	6871.21	6748.03	4099.08	3651.3	5369.14	5519.64	3489.79	5941.01	8293.72	7180.57	3128.43	2605.11	1751.9	4238.82	3363.15	1983.98	2021.16	2700.1	4832.1	3864.84	3218.02	3395.04	3463.55	3284.8	3517.59	4580.5
Ccdc50	NA	591.594	759.083	885.81	1312.81	1420.51	NA	NA	NA	1159.18	NA	618.573	NA	824.89	NA	NA	1253.73	1562.78	NA	NA	NA	625.041	1160.08	1672.05	1870.97	NA	NA	NA	NA	858.734
Mbnl1	2066.85	2549.2	4126.93	3061.57	2240.24	1283.61	1803.32	NA	3824.02	2137.78	4240.03	4288.25	2174.59	4549.32	NA	2710.42	NA	2560.59	2680.24	1549.57	1544.26	2608.08	2552.82	NA	3318.62	NA	3102.21	1572.53	3709.76	3629.88
Tbcd	9913.46	8505.53	9255.73	9773.1	10104.9	11364.2	9727.02	9344.39	10019.6	11604	6666.35	8699.85	10340.1	11611.3	5203.31	6324.1	9318.73	10570.8	9030.37	7146.29	8098.71	8955.47	8821.64	9034.69	8281.26	9520.24	8534.14	8067.35	6985.59	8516.25
Commd10	2658.18	3337.69	3109.56	3518.47	2850.2	3331.32	2649.78	2237.64	3525.37	2576.19	2463.59	2489.93	2728.75	2499.88	2423.63	3305.28	2244.25	2376.37	4529.29	4044.23	1905.03	2450.77	3368.24	3755.75	1710.13	2066.05	2778.45	2441.98	3647.95	4497.27
Vti1b	7068.22	6509.7	6156.89	6236.52	5911.11	5850.4	5638.04	5737.39	5507.67	5802.44	7603.1	6824.29	6556.42	5157.78	3686.66	4301.94	2897.66	3677.26	4738.15	3959.4	4610.23	3742.64	5033.32	4675.13	3691.96	3971.15	3407.67	3341.56	5368.88	5482.61
Macroh2a1	77019.6	89205.2	90764.7	86733.5	76437.9	80718.1	93995.9	88023	88431.8	98322.7	84173.3	89590.8	74622.8	90292.5	82946.1	82833.1	88723.1	75330.5	82401.4	74783	93074.8	89702.9	82452.1	90007.1	87320.5	75055.2	109714	112737	96680.7	88550.1
Acot7	7459.1	6882.73	7644.08	7982.63	7819.28	9367.28	6648.13	6446.17	8625.1	8556.65	9068.15	6694.97	8577.01	10398	5016.81	6166.7	8706.18	8832.74	5246.88	5429.16	6724.07	7035.08	10213.3	9693.66	6233.86	7118.19	9241.41	9226.18	9778.64	8219.91
Prkar2b	4970.72	5387.75	5574.08	4089.57	5926.59	6178.9	5684.19	4441.41	5421.77	6023.01	5640.51	5535.53	5176.67	6925.7	5699.97	3702.5	4790.44	2607.73	2973.18	2862.42	3543.62	3588.65	3905.86	4190.06	4750.75	4068.15	4650.16	4724.44	6038.62	5448.38
Tubgcp2	1892.34	1824.44	1426.3	1604.25	2188.82	1704.51	1879.49	1917.55	1960.62	1509.26	1728.23	1871.53	1957.52	1650.39	1691.18	2097.47	1467.03	1757.98	1273.15	1326.22	1931.62	1418.44	1428.71	1370.14	1886.96	1532.43	2131.71	1244.47	1703.29	1765.23
Ptpmt1	2054.88	2345.95	2408.03	3166.16	3316.24	3045.64	2557.5	3309.8	3060.28	3645.11	2363.14	2292.99	2347.14	2729.63	3796.92	3571.38	2131.96	2263.4	1464.85	1927.55	2784.04	4132.84	1970.35	2845.6	2232.65	3534.96	2748.65	3352.3	2453.82	2097.01
Vcl	64519.5	66722.4	62453.2	63981.8	68601.1	70507.8	60107.8	57422.2	67111.1	68872.6	62003.2	60380.2	72271	72324.9	58970	55622.4	72252.8	70249.2	67086.8	66816.3	65900.8	66339	76272.3	75309.5	58073.6	57153.3	59167.8	59909	74145.6	72066.4
Crot	3222.13	2842.39	2993.56	3725.08	3491.9	2922.27	2356.6	2711.29	3451.47	3102.11	2735.98	2749.86	4125.41	3484.82	2454.38	2220.35	3628.45	3216.71	2208.5	2152.74	3415.89	2779.2	2759.36	4038.28	2399.82	1544.28	2944.74	3135.12	2782.47	3453.31
Tfe3	806.966	629.613	541.556	783.126	686.341	702.106	790.875	519.56	1015.25	531.534	571.928	1048.81	549.098	743.474	1401.59	691.485	946.185	270.164	NA	NA	941.735	1046.77	1210.67	NA	992.643	384.449	402.153	NA	757.588	329.548
Rnf214	1723.9	1721.3	2984.62	3109.02	2228.89	1889.73	2153.59	1928.1	2635.75	1428.71	1954.95	1538.14	1324.11	1838.38	1209.65	1977.23	1964.16	1990.4	695.534	1588.7	1383.54	1570.05	1564.01	1297.02	1523.48	1840.23	1467.71	1308.31	2575.26	1436.4
Dmac2l	2081.98	2281.85	2769.2	1871.42	2058.04	2500.99	2473.02	2235.09	2658.39	2101.59	2449.28	3600.26	2862.34	2547.47	4307.16	6239.19	1983.5	2344.1	1130.41	3426.7	3008.11	2738.02	1949.42	1997.75	3075.33	3445.11	2109.93	2671.07	2665.31	2579.49
Slmap	6197.05	5230.41	7013.01	6371.6	5887.72	5845.32	5625.24	6102.42	6803.04	6872.9	5529.15	5701.52	7810.26	7143.12	6815.58	5516.02	7287.18	7857.93	5873.79	5562.23	6873.91	6947.99	6359.1	5420.8	5431.72	4627.4	5119.16	5455.32	6753.49	6692.72
Sh3pxd2b	4516.6	4794.69	5127.01	4750.46	5782.73	5788.17	5082.89	4805.84	4982.59	4167.68	4148.48	3988.58	5146.89	5111.33	4398.32	3061.78	5652.66	4977.47	5098.86	4380.17	3589.19	3449.56	5269.51	5679.45	5760.88	5266.26	5993.59	4443.07	4119.75	4712.81
Akr7a2	6170.27	8190.29	6711.98	7846.09	10323.9	8500.95	7605.78	6984.43	9428.49	7799.41	8488.3	7277.56	9512.35	10235.2	8229.29	9009.56	6059.21	6248.2	7062.95	6795.51	9529.94	7631.13	5919.24	5885.95	7368.27	7307.34	6276.11	6239.86	7120.44	7703.41
Adsl	15631	14146.5	15787.1	16509.3	15071.1	16658	15440.9	16418.7	17210.9	18215.7	14147.8	13394.4	18664.7	17886.7	18073.1	14649.4	18205.2	19752.2	19355.8	20818.2	23147.6	21894	15012.5	14753	17439	17866.6	16389.4	18095.1	17515.2	17204.5
Dnajc8	16508.4	20329.6	21355.9	21984.8	16735.7	19668.4	19377.5	19855.4	20373.9	22256.8	20838.1	20941.1	17258.4	20430.2	18576.2	20944.2	16145.5	18081.7	12416.4	15280.2	13974.1	16402.7	19500.2	22020.1	21088.1	18577.7	15470.7	17664.5	18801.6	19564.3
Anxa4	64839.8	58592.7	68702	63991.4	66258.3	58913.2	68378.1	64410.2	66336.4	62870.6	67405.3	53864.5	61515.3	58799.7	45954.6	42711.1	86424	77912.8	69245.9	72408.5	81013.5	68220.3	86720	77297.7	77968.4	77040.6	71578.6	72737.2	73220.9	64705.1
Acsf2	9265.92	7202.59	7339.42	7283.44	8547.61	8160.36	8227.14	8489.32	10390.4	9757.64	7468.11	6771.25	12139	11973.6	4386.65	4603.78	7201.72	6587.86	5453.89	6229.2	6246.57	5735.12	6687.42	5652.91	6152.13	7792.78	7396.28	6604.75	6260.55	7088.75
Iah1	20160.5	17832.6	20072.3	20386.2	21083.2	25625.7	20970.5	20414.9	26771.1	25973.1	28423.5	21374.6	27545.5	27797.8	21323	21294.3	21665.7	21601	16284.9	22006.3	18176.2	20065.8	19688.5	20096.4	16779.6	17460.5	15129.6	17040.8	25859.2	20865.3
Dlg1	10013.4	9855.82	10616.4	9880.88	10893.7	10762.3	9887.13	11158.7	10291.7	10719.7	8471.36	9283.61	9586.97	9856.19	7432.81	6874.73	12972	10886.4	8407.93	9216.09	9941.19	8366.16	9047.11	11919.4	11064	10309.1	10541.4	11150.3	11052	10896.3
Eif4b	25349.1	24417.1	21258.3	21893.1	21987.7	22302.8	20245.8	17016.7	22785.6	21949.6	25782.8	19781.1	24430.3	23187.5	20071.5	22578	26077.7	27400.7	24779.2	23179.9	19066.5	21855	26907.4	29144.8	25617	28309.5	18849.8	20358.3	28013.3	24469.2
Senp7	999.774	579.565	778.774	967.327	794.737	810.67	573.535	879.17	537.12	921.216	859.668	762.821	788.748	725.88	546.652	907.704	1070.97	561.566	NA	777.273	1126.83	957.834	780.617	695.258	1171.5	1037.62	828.107	860.108	813.797	545.653
Supt16h	17030.4	15726.6	14914.6	15712.4	15294.3	15018.4	17548.7	16907.1	14949	15267.9	15587.1	16066	14163.6	15681.4	13761	13325.4	16642.1	17097.4	16440.9	16478.2	16890.9	17417.6	14991.9	15811.9	17589.3	17126.2	18365.1	18516.4	14984.4	15257.1
Acsbg1	7369.55	6220.19	7831.28	9080.63	6609.86	6748.85	12779.3	13745.5	9278.77	10333.2	10206.1	11105	9642.68	9539.33	7593.51	7199.2	6902.83	7615.97	6812.65	7148.87	7634.74	7849.35	10040.9	8909.25	13329.1	11925.9	10524.7	12137	10176.3	11555.5
Mocs2	791.959	1402.69	495.802	1246.16	580.838	452.967	956.929	956.226	512.814	1148.38	1570.42	1715.22	1202.62	1571	481.398	880.389	336.537	1316.55	3395.23	1362.29	1074.01	1318.51	1957.99	1554.16	1077.71	727.962	1024.31	1218.93	1433.12	1461.85
Dbt	10905.9	10306.2	12132.3	11826.2	11899.1	12797.8	12029.4	11721.1	13144	13443.6	14128.4	13785.2	13192.9	12347.5	17177.7	13883.2	11860.4	12641.7	11938.3	11354.9	11263.1	11923.8	10116.3	10314.8	12469.2	11328.6	11145.6	13102.9	11575.1	12651.6
Cast	28342.2	26769	31816.1	30347.8	25984.1	31019.7	23510.9	24143.6	26138	26051.2	22890.4	25328	25349.1	22289.8	22232.1	22397.2	45153.5	45209.1	38038.6	34238	31175.4	26729.4	40091.3	39349	47377.6	42036.1	33731.8	31814.9	38988.6	39686.7
Sdhd	NA	NA	2082.1	2632.71	2720.12	3107.96	1261.57	3131.37	2602.81	3153.44	NA	3900.99	2641	3662.11	1740.56	3900.72	1992.97	NA	NA	2645.52	NA	3120.52	NA	NA	2454.47	NA	3019.25	3013.63	4737.27	4703.54
Top2b	23913	23384.1	24383.5	25368.4	23001.3	23378.3	27150.2	27319	23687.8	25487.4	24757.4	26198.9	25120.5	22818.2	22749.8	21376.9	21960	22641.3	22652.8	23287.4	24592	23772.6	24477	22400.8	29641.5	30268.4	29554.1	29776.4	26515.8	25883.7
Synpo	3353.59	2706.88	2239.62	3085.03	2987.92	2770.71	2200.78	2249.08	3450.53	3145.26	2225.87	2414.53	2618.93	3357.15	2184.98	1909.42	3227.1	3035.98	1856.25	2211.74	4717.5	4872.49	1852.34	2572.87	1995.4	1862.28	1864.42	2135.39	2491.77	1862.31
Evpl	55054.6	53221.3	51277	50557	46739.9	46677.7	46975.5	47459.5	49305.3	49571.1	48481	47186.5	39457.8	40699.9	46418.5	43983.1	45468.9	45233.9	60470.3	58963.3	46281.6	44466.9	45654.9	45159.6	49468.4	46862.7	53661.8	52072.4	51435.6	53019.3
Sh3pxd2a	1760.32	1669.64	1938.17	2057.45	1883.15	1959.65	2236.12	2447.6	2163.15	1585.97	2155.2	2129.65	1469.53	2329.62	1938.4	1257.07	2062.88	1778.62	2137.4	1483.32	1859.82	2186.7	1270.6	1507.49	1959.91	2243.92	1636.31	2583.08	1885.19	1839.92
Mycbp2	3769.38	3779.84	4021.7	4117.66	3336.14	3670.38	4286.29	4207.28	3897.64	3786.4	4022.82	4293.81	3566.72	3757.45	4116.75	4212.52	3592.92	3691.56	3757.17	3954.76	4240.54	4087.21	3444.18	3450.53	4229.69	3838.65	4712.26	4740.52	4158.34	4240.14
Arhgap21	425.293	NA	NA	144.257	372.973	207.006	416.013	428.475	159.442	375.492	240.556	257.06	454.583	316.833	NA	NA	277.043	389.655	NA	NA	134.857	NA	469.73	434.583	278.151	374.498	123.328	411.519	NA	391.608
Bud13	NA	607.876	893.26	761.631	702.912	459.775	431.095	501.83	NA	433.423	NA	270.795	NA	754.538	1215.07	561.234	592.191	382.089	1107.48	NA	NA	705.339	253.652	971.915	758.83	NA	1086.81	609.041	260.911	534.671
Golga5	4650.37	3840.09	4015.9	3916.84	3755.78	3987.95	3937.69	4240.23	3674.04	3960.71	3686.55	2865.83	3850.11	3786.26	1883.84	2145.43	2595.46	2651.92	2734.82	3407.36	3743.41	2741.8	3808.76	3019.82	3362.71	2749.98	2748	2765.26	2997.53	3490.73
Capn5	2652.42	2861.56	3209.19	2725.53	3276.18	2623.59	3802.91	3739.12	3601.65	3589	3444.53	3283.91	3555.31	3656.45	2322.53	1992.08	2670.6	3182.3	2396.08	2473.5	3174.48	3027.97	3199.31	3016.24	3579.81	3327.47	4858.6	3985.33	3217.39	3777.59
Pkp3	101717	99956.2	108042	101940	86383.1	86052.9	105263	101214	91056.9	86710.4	92047.3	88707.4	82874.9	80443.3	87503.1	77596.4	80147.4	81102.4	97655.4	102644	99438.5	97503	91115.8	86740.4	97305.5	98173.3	111036	101501	116026	111851
Map4k4	3463.12	2500.37	3430.24	3157.1	2766.64	2892.56	2904.63	3031.64	2679.57	2498.32	2176.14	2595.53	3341.39	3011.71	2393.19	1620.15	3146.4	3526.07	2369.04	2644.59	2913.62	3117.61	3009.44	3054.97	2761.87	3627.17	2939.47	3216.21	3431.19	2941.25
Ppp1r2	8659.53	4586.17	6556.61	7316.1	7590.35	7865.5	6702.95	8915.54	7753.57	7126.72	5066.36	4445	8254.81	5541.9	3438.23	3347.98	6545.95	3296.21	2960.27	3314.19	6881.44	5765.03	3920.69	4488.11	7405.48	5209.96	5797.65	4591.01	10542.2	7122.21
Tppp3	58390.8	61084.7	63513.7	63712.5	79597.7	76630.1	43308.9	39228.1	55502.6	53750.7	42245.4	44566.1	53793.4	52782.2	33916.2	24685.4	46690.1	44775	59940.7	61156.5	33507.9	31341.1	82016.1	86204.5	47303.8	50522	47571.3	44414.1	96434.2	75958.7
Lxn	15772.6	13847.6	15741.6	16188.1	15115	18272.4	15443.8	21312.5	16214.5	20128.1	15588.5	13832.6	18972.8	21280	8485.2	10587.7	16837.3	17418.7	20392.8	14431.5	19457.9	13561.7	18660.4	18426.4	13941.9	14350.7	18851.1	22205.5	14009.2	19587.6
Lama4	17687.1	16166.7	18449.1	18646	16554.8	17043.9	17742.5	18464.3	19643.6	19881	17584.4	18149.2	20618.4	20316.4	12695.8	11392	24543	23315.2	14393.7	14060.7	16664	15448.8	15768.1	14663	10684.8	10853.8	16910	17696.8	15871.8	15746.6
Dsg2	4502.61	4309.45	4024.52	4227.07	4504.59	4305.91	3662.42	4007.41	3604.05	3583.94	3538.15	3227.18	4579.8	4201.45	3233.06	2580.51	4630.09	4338.19	4236.35	4692.21	3082.68	3516.17	4782.14	4598.69	4674.67	5013.34	3842.37	4638.94	3500.65	4183.33
Strap	30617.5	30014.6	33045.7	31188.1	30684.4	29677.6	33512.2	31153.8	29665.2	30284.1	28303.8	26644.5	27177.7	30919.9	21652.1	21413.3	30758.8	30809.1	35194.2	33452	34656.6	34276.2	29076	32580.7	25864.5	29642.5	34032	34533.6	32458.1	33090.1
Hif1an	1310.19	509.646	1436.57	717.426	1310.94	1161.63	1405.42	887.308	1226.69	1310.07	1041.91	1063.11	1142.92	1997.08	1324.59	940.299	993.98	448.112	1081.6	1464.6	918.04	853.724	642.166	1220.91	1128.58	1727.04	1813.75	631.037	1170.26	1570.13
Nucb2	17521	20034.2	17891.4	20049.1	22681.8	25692.8	14077	15944.5	17045	19351.7	15528.2	14251.6	17688.8	17236.5	5975.1	5986.54	10943.7	14760.2	9443.42	9306.25	12011.8	13482.6	9968.08	11456.5	9374.28	10539.3	5343.37	5971.82	9334.42	9923.13
Unc119b	3872.99	5220.73	4333.37	5652.79	5925.11	6276.79	4604.82	4813.25	3882	4310.4	4067.02	4967.34	5769.41	5829.25	5219.14	3514.55	3003.7	3414.28	3351.61	3844.86	3604.8	3767.74	5123.98	3284.91	4776.17	4585.22	4483.08	4160.57	4220.95	4853.1
Pdia6	50935.2	62677.1	58848.5	65822.5	69263.5	72989.5	59026.2	63553.8	65065.8	64266.6	52344.7	50905.9	63526	64575.1	36037.4	40646	63808.6	61416.2	58061.6	61198	56451.5	57218.5	70558.8	76513.4	67353.3	67710.4	44593.3	49336.4	56898	53911
Stk11ip	556.352	NA	274.329	285.52	374.057	498.442	328.069	100.622	262.884	834.379	515.123	233.561	NA	NA	524.904	NA	NA	NA	NA	NA	NA	413.583	NA	323.383	NA	NA	NA	NA	NA	NA
Slc25a11	44228.3	45620.5	35034.3	37779	33783.4	37037.4	35311.1	41810.7	39442.3	44577.7	55537.5	55027.4	44907.4	43383.9	63907.7	73999.1	37121.5	31798.9	37451	36393	52471.1	54282.5	40571.3	36139.3	44045.2	37860.5	39906.9	41161.4	45903.4	44043.7
Tmf1	3454.27	3661.8	4122.89	3266.08	3869.39	3551.78	3422.66	3078.18	4032.65	3088.57	3053.66	3056.68	3120.83	2499.94	2067.45	1928.38	3253.81	2202.73	2971.15	2872.99	2586.28	2257.63	1724.67	2373.43	2830.96	2942.24	2679.75	2541.92	3203.61	2227.18
Macf1	23909.4	22557.1	23820.4	23098.9	20847.8	21152.6	21240.8	21016.9	20292.1	19255.2	19524.9	19552.3	18518.7	17726.8	17736.3	16472.7	19433.8	20004.7	22926.8	22993.8	20006.9	17989.9	23023.3	21456	23742.4	22978.7	24486.9	24694.2	24650.6	24772.1
Cdc73	3539.28	4264.44	3898.49	3614.76	3776.3	3643.06	4135.13	4439.06	3662.28	3772.25	4429.46	3566.83	3691.24	4142.61	3083.17	3403.59	3413.56	3325.89	3752.51	3110.88	3648.92	3836.71	3443.74	3666.94	3804.55	4503.1	3705.16	3998.23	3640.48	3813.17
Atrx	3663.32	4757.38	4397.64	4624.31	4340.69	3559.78	5078.27	4942.63	4734.86	4772.05	4315.08	4428.76	4145.79	4231.71	3507.27	3213.23	3838.83	3860.66	3518.06	3520.61	3947.84	3843.28	4338.89	4334.79	4091.45	4249.24	3723.16	3577.31	3417.11	4161.69
Gpam	2963.25	1834.43	3235.88	2799.3	2464.73	2457.5	3529.08	2677.65	2473.19	1948.19	2822.46	2534.93	2542.81	2579.75	3373.82	3405.26	3104.25	3148.36	2827.93	3366.21	3845.47	3141.51	1577.98	1484.1	3592.52	2263.38	3648.54	3080.27	2809.84	2473.05
Adk	54186.1	58016.1	52563.6	57129.9	70553.2	69177.6	50637.5	53949.1	73043.1	72343	43517.7	49425.3	65586.4	66399.7	34032.6	30942.2	44919.5	44254.1	38939.5	45704	45935.9	39349.8	49926	44374.8	45587.3	39667.3	47452.9	52291.1	51813.2	50210.4
Psmg1	4744.47	5254.18	4767.79	6185.46	5937.81	6087.24	5822.62	5203.53	5147.18	6017.19	6440.25	7498.41	5544.84	7272.37	6302.57	5696.56	3664.32	4686.88	6018.02	4173.05	6168.91	5940.4	4794.14	5568.85	6275.05	5874.19	6083.95	5886.07	5918.86	5641.27
Mccc2	5452.45	5712.79	6374.84	6294.94	6839.27	6576.4	7215.69	7549.39	6918.93	7570.35	6761.2	8748.89	6298.43	6720.37	7285.88	7528.57	6705.5	6085.51	5112.77	5436.61	6657.25	7082.62	5078.83	5037.33	7765.43	8440.36	6687.97	7687.53	6113.14	6462.07
Tmod2	7781.27	6738.92	6962.86	8648.74	10390	9019.76	8939.64	8035.65	9113.08	7344.96	9130.33	8509.03	9417.34	9968.69	5462.54	5068.98	7234.82	6858.4	4429.28	4448.59	6486.35	4962.93	10353.8	11065.5	5359.28	5071.01	6367.68	5335.31	5894.47	8810.3
Prkar2a	8901.72	11567.2	13183.2	11581.2	10624.5	9460.02	11623	10572.2	10265.8	9159.1	10525.4	11092.5	10242.3	10779.3	11872.3	8014.69	12364.9	12937.7	13017.1	8572.67	12953	13895.9	11805.3	10956	10617.6	7255.74	10389.9	10319.1	10115	11055.9
Gle1	2124.64	1759.92	1733.29	1969.92	1692.47	1389.91	2025.88	1198.25	1480.68	1654.56	1533.15	1429.14	2009.5	1804.4	1333.13	1324.68	1508.9	1626.62	1386.51	1850.91	1355.31	1748.32	1492.06	1816.22	1562.64	1513.75	1328.07	1617.22	1664.11	1284.32
Myo5a	8588.01	8329.36	9484.23	8287.5	7675.12	7947.34	8646.82	9315.41	7164.83	7393.32	7682.12	8196.27	8029.22	7728.36	6897.43	7058.3	8745.53	8623.08	8173.71	8159.25	9258.56	8536.32	7555.52	7415.15	9355.82	8829.21	9909.97	8880.17	7480.67	7974.13
Smc1a	17246.6	16912	17982.8	17878.1	16953.3	16473.7	18636.8	18595.5	17721	17532.3	17279.1	18379.5	16102.1	17369.4	14163	13562.8	18215.7	17862.6	14726.4	15193.6	16528.4	16371.9	14916.5	15209	20736.5	17987.1	18720.2	18825.4	15563.6	16041.9
Nup107	5874.73	5814.01	6408.83	6224.28	5362.27	5468.94	6937.03	6438.73	6012.11	5889.14	5424.72	5982.07	6301.71	5663.73	6102.88	5574.67	5707.81	5374.13	4130.79	5007.05	6118.84	5344.55	5429.42	4719.88	6172.34	5320.57	5996.28	5762.05	4758.96	6599.77
Golga3	2789.15	2782.44	2944.09	3097.16	2908.56	3050.26	2621.98	3021.31	2737.57	2743.6	2289.29	2340.56	2636.82	2708.74	1615.52	1439.8	1893.94	2176.43	2185.71	2522.54	2125.61	2609.84	3020.97	2403.44	1823.36	1880.09	2409.43	2188.52	1845.37	1772.41
Syne3	5057.34	4306.44	5090.58	4469.66	4956.72	5108.21	4213.47	4350.94	5258.59	5049.84	4866.68	4965.18	5056.21	4342.02	4031.83	3769.26	3475.73	3694.61	2918.09	2528.1	3056.39	3603.39	4834.4	5724.12	4538.51	3565.77	4436.73	3421.33	4229.52	4743.72
Dnajc7	10172.8	10412.2	11276.8	11422.4	9847.24	9937.29	10620.8	10007.2	9954.47	10880.9	9494.83	11529.2	9556.74	10179.6	7826.12	7091.57	9867.77	10301.9	9441.25	9295.17	11190.6	9873.76	10428.9	9632.97	9805.62	9832.44	9224.74	9665.91	10348.4	10121.9
Acot6	2764.19	2730.9	2883.83	2575.24	2858.77	2613.54	2704.74	2235.59	2948.82	2629	2708.51	3351.28	2116.95	3150.72	3447.53	2750.43	1343.28	2045.37	1992.38	2561.28	1968	2740.05	1504.56	2273.94	3690.33	2573.07	1740.8	1383.97	2322.31	2669.98
Sbf2	1280.13	1456.47	1951.93	1590.65	1488.1	1744.41	1385.85	1191.5	1216.76	1329.49	1608.41	1677	1573.73	1946.16	992.313	1241.22	2725.36	1116.36	1211.28	915.435	1653.67	1537.64	1839.39	1509.52	1673.11	1640.91	1463.49	2000.57	1071.42	2260.05
Pycr3	5091.17	5700.84	4003.17	5736.94	4837.78	5095.85	4662.23	6576.74	5793.13	6524.43	4351.46	5588.04	7177.31	6046.01	7208.39	8113.87	4410.47	5149.46	7751.76	5111.32	4041.03	5859.82	5582.64	6672.09	4896.53	4650.83	4514.67	6522.46	6881.35	7704.96
Lrrfip1	6634.27	5967.36	8057.55	7384.66	5967.46	6144.98	5560.92	5475.26	6920.99	5811.67	5170.78	4558.89	6140.99	5109.1	6509.03	5166.3	9420.71	9777.41	8670.4	6640.02	7929.21	5529.09	13389.9	10320.3	10024.7	9929.31	6568.52	7197.34	9163.79	10870.8
Pdia4	26645.9	27610.1	25596.9	26683.6	30432.1	30565.5	26409.4	25988.2	25200.5	27215.4	25335.8	24778.5	26325.7	27592.2	18448.9	18866.6	22040.5	22874.6	23725.1	23037	22552.1	24067.8	26291.4	28326.5	22920.3	24123.7	22172.9	23038.4	23474.6	23316.1
Rbm15	3254.99	3032.58	3397.35	3455.88	2796.9	2916.51	2791.39	2740.74	3904.3	2603.64	2224.89	2847.6	2784.23	3067.36	2399.58	1971.66	3731.61	3362.64	2477.6	2316.29	2622.36	3012.13	2760.54	3090.74	4413.02	3560.18	3782.08	3558.72	2148.44	2909.54
Zc3hc1	2202.77	2733.37	2223.92	2759.53	2071.28	2996.63	3155.02	3023.2	3077.1	2671.74	2464.92	2401.43	2045.12	3119.48	3439.15	2303.24	3991.08	3831.45	2968.57	3051.4	2449.62	2462.71	3687.27	3227.24	3725.49	2767.24	2827.87	3260.27	3386.24	3383.43
Gfod2	891.19	1127.6	1187.29	292.695	1259.06	824.783	1563.59	570.733	1133.16	1582.74	1086.39	939.841	1163.12	952.175	1209.17	1553.93	NA	1020.22	NA	NA	2034.66	NA	NA	NA	NA	876.75	1493.49	NA	1294.42	897.673
Dync1h1	64446.1	66998.9	66035.2	67191	64008.8	64595.9	66208	66094.2	63580.3	63375.2	62340.8	61458.7	62291.6	63104.2	54386.6	52186.6	62697.5	61695.8	66626.4	66271.5	65317.8	66012.7	65891.5	62775.7	66527.3	66622.1	74626.8	74602.3	67853.4	68183.2
Fam177a1	9883.31	7034.42	12031.4	7981.38	8173.98	7302.56	9169.59	9763.68	8903.52	10920.4	7564.79	7992.22	10523.2	7355.2	5296.24	4317.51	8616.44	7634.52	5102.41	7590.61	9242.25	8938.74	7070.8	9835.52	8349.81	7128.77	6317.44	8440.02	10466.9	8086.32
Sec23a	19779.2	20716	21042.6	23193.3	25246.4	26589.4	21415.9	20657.5	22215.1	22725.4	16621.3	18215.6	18917	20835.6	12420.7	13323.3	14048.2	11570.5	12785.2	13648.8	14802.1	14824.8	11713.6	13118	13347.2	12424	15564.6	17977	14814.7	15029
Synpo2l	NA	NA	NA	NA	NA	NA	NA	634.328	1102.88	444.898	952.049	918.007	702.654	448.165	1183.85	458.833	870.162	718.159	NA	NA	2866.49	3039.71	NA	NA	NA	NA	NA	1166.69	NA	NA
Polr3e	1232.95	1084.3	721.683	820.551	1078.95	1014.66	730.641	1180.64	1167.17	1457.09	904.111	1092.83	887.405	1040.92	1161.98	1254.82	923.538	773.477	907.663	769.691	803.224	666.055	836.331	983.139	738.103	634.335	972.084	887.249	940.998	1045.73
Ints12	3220.6	2453.27	3149.8	3172.29	2447.53	1976.76	2764.05	2668.18	4190.81	2204.17	2929.56	3055.9	2798.02	2401.69	1932.14	2327.68	2195.67	2164.33	624.307	1886.26	2528.65	2240.86	3133	1746.83	3308.02	2543.44	3345.27	3219.53	2548.11	3119.59
Yrdc	2095.73	1507.44	2158.72	2713.35	1931.68	1793.55	2362.62	2112.01	2324.03	2054.18	2427.47	1930.72	1905.11	2420.68	3819.44	2763.05	2480.76	1405.43	2941.02	2063.63	2250.93	1461.2	1623.65	2272.89	2037.59	2308.88	1544.6	1727.99	3258.65	2905.12
Tgfbi	109715	107427	102316	99550.7	88009.7	88085.3	102883	107480	114001	108427	112652	119763	88675.9	91949.2	139949	139666	153092	150627	138099	145408	112699	114393	150276	151701	151637	145790	162360	175310	155764	149599
Uba1	106514	103838	106304	113655	111975	114452	107249	104690	105505	109570	95187.5	90394	116437	108520	78636.5	77085	126359	123087	123464	129320	115505	118318	131365	130988	125847	126250	134951	122971	119682	114653
Hsd17b4	38211.7	36254.9	37450.9	36044.7	38717.3	36546.3	43440.2	42986.5	41321	40735.1	38971.4	38313	40274.5	38731	32859.3	29715.5	34529.6	33986.4	31271.1	35050	36519.5	34045.4	32627	34505.3	38683.2	38090.2	41988.3	43300.3	40283.1	38605.8
Zc3h11a	4864.1	4211.74	4114.09	3798.83	4227.73	3588.99	4669.19	4014.95	3821.32	3655.87	3552.78	3919.25	3552.5	3170.92	2564	2613.88	4129.48	4224.66	3430.6	3137.84	2964.07	3483.28	4265.1	3102.1	4726.77	3729.22	4427.67	4029.69	3231.62	3719.45
Edc3	1805.44	1910.42	2685.99	1984.58	2199.69	2218.55	2315.01	1948.79	1993.2	1901.92	1672.99	1336.69	1839.91	1719.56	1649.5	1624.18	2001.13	2543.53	2525.63	1935.74	2421.24	2447.64	2544.85	2357.55	2257.83	1814.23	2385.36	2435.16	2079.84	2371.38
Adh5	38237.9	53551.1	45578.5	45259.4	50255.4	53202.8	41846.3	42210.5	54230.3	57456	39406.1	42188.7	48714.2	55263.8	40838.2	36532.7	42913.6	47784.4	50818	53090	40980.9	44332.5	41370.4	44784.9	43218.9	39639.5	47827.6	46103.8	46413.6	50239.2
Etfa	72310.6	71862.2	81639.6	74090.9	85800.1	84281.1	78844.7	73590.4	82896.1	84427.9	76115.6	67362.5	81343.9	79066.3	60081.7	57062.4	72526.1	69781.6	78683.8	76784	81990.6	83748.8	80709	81922	68520.7	69171.4	75356	73718.8	80480.3	73240.2
Decr2	3709.6	3317.17	3315.06	3726.4	2925.31	3666.97	4514.59	4371.7	3389.61	3632.69	5170.57	3644.87	3805.74	4106.61	3231.17	4367.42	2904.74	3061.7	2825.15	2839.92	3688.15	2772.46	3953.41	2496.26	4218.72	5226.4	3770.45	3985.28	3561.4	4479.72
Ptpn13	5486.8	5330.89	5354.94	5803.71	4938.41	5105.18	5832.9	5772.64	5383.62	5523.36	5933.85	6171.89	4814.88	5227.83	6043.49	5887	4839.91	5058.07	5837.64	5488.92	5361.94	5220.9	5091.63	4925.82	7302.4	6490.84	6101.07	6048.15	5770.16	6394.44
Hsdl1	3855.66	4473.62	4112.14	3543.51	3233.47	3604.02	5983.78	5383.35	5146.62	4571.5	5218.39	4754.57	4158.58	4534.43	5282.04	5673.73	3245.33	3413.78	3282.12	3080.44	3840.8	4308.42	2630.26	4120.01	5596.14	3916.11	4201.78	4923.7	4106.15	4771.05
Hspd1	75608	80470.6	85812.2	84346.5	74965.2	79975.5	76045.7	75970.3	80865.4	78934.2	66829.8	67634.7	68829.8	74818.1	58121.8	61242.8	80023.6	82982.4	96320.7	99788.4	79934.1	83113.4	67797.6	73224.2	70362	67925.6	69530.4	68865.5	80966.4	78450.3
Mthfd1l	18134.3	17129.2	17426.2	17223.1	18646.3	18507.9	14203.6	13108.7	15199.6	15419.6	13742.7	13435	15044.1	12972.2	12012.3	11620.2	16070.1	15333.4	16013.7	16160	15514.5	12384.2	14836.9	14835.2	14827.2	13538.5	15116.5	13329.9	13239	13356
Kpnb1	50123.5	48783.3	50980.3	42791.9	49567.5	49772	47064.5	45412.1	48553.4	48003.3	49647	43602.7	49914.4	43528.4	42924.9	42423	45437.8	48846.7	43260.2	49943.8	51632.4	52671	42566.1	41484.5	51207.8	49413.7	42529.3	35886.2	49528.2	47650
Sympk	2662.83	2526.19	2245.02	2523.9	2246.34	2476.22	2284.36	2604.83	2467.81	2472.84	2713.92	2421.48	2275.51	2304.9	2159.68	2379.34	1856.44	1898.13	2194.98	2293.25	1825.55	2018.37	2265.36	1520.08	2245.37	2404.98	2257.38	2208.72	2013.79	2186.53
Tnnc1	NA	NA	NA	NA	NA	NA	NA	NA	3482	3434.59	2059.61	1596.2	4483.28	3709.27	2597.57	2848.91	19701.1	18430	3223.3	3547.26	68029.6	59684.5	NA	NA	5308.8	5281.22	NA	NA	NA	NA
Bckdhb	2219.04	3049.08	4427.02	3592.64	3233.29	4315.6	3634.41	2601.72	3635.5	2690.18	3050.59	2597.49	3818.45	2793.23	3292.75	2536.66	2926.85	2015.1	3016.52	3568.92	3327.37	2373.64	2347.74	1682.41	3591.69	2906.64	2202.34	3166.34	3065.52	1296.58
Psmd1	32812.9	33369.2	32419.5	33355.8	30497.5	31838.5	31850.2	31120.9	32319.7	33748.5	32460.4	29445.8	30075.7	32386.1	26851.9	24498.4	32120.3	37553.6	33715.3	35419.6	37419.3	36068.2	33878.6	33801	34680.8	34562.3	35791.7	37400.4	34198.5	36445.3
Ewsr1	60120	67071	49089.5	57749.4	57830.2	63035.9	42781.4	47765.1	61895.8	62958.9	43987.9	40680.2	47769.2	48878.5	35862.8	30840.9	42538.1	50151.3	43281.7	45349.8	34560	33611.5	48692.4	45239.4	37880.9	42079.9	38087.2	35495.5	50162.4	42512.8
Naa35	5026.52	5979.21	5501.5	5495.87	4409.88	4430.54	5564.42	6353.19	5160.31	5356.71	5446.86	5782.78	5560.34	5739.6	6221.54	7169.45	5071.03	5415.4	4508.41	4182.2	5892.34	5190.07	4365.37	4637.95	5263.08	6046.65	4870.88	5181.49	4932.62	5154.22
Cep43	1047.55	1828.51	1143.12	1694.27	771.487	1697.29	1312.01	1651.15	1303.93	1558.21	1812.61	1058.52	2114.11	1959.76	1168.78	734.187	1320.39	1150.11	NA	1922.4	1303.17	965.246	743.003	1566.48	952.42	836.19	991.66	1084.14	1037.77	1634.35
C3	44158.1	47508.1	45349.3	44934.6	80962	85178	55716.8	55784.5	70294	66810.9	70299.4	72080.8	86067.1	89050	30322.7	29257.3	51485.8	53331.8	44487.9	43727.5	50482.7	50560.4	86152.9	87852.5	51971.6	49371	70510.7	72439	79614.9	80730
Inava	370.858	575.986	922.963	574.689	527.428	406.335	812.32	789.687	514.597	506.901	475.496	474.217	NA	397.909	383.977	347.744	489.751	428.78	NA	374.525	771.408	980.088	1245.29	935.898	529.309	281.302	156.835	492.295	198.223	786.944
Hr	656.584	750.325	837.067	924.621	512.036	703.062	895.346	719.039	438.695	995.016	710.42	917.502	552.007	821.602	550.104	656.726	1162.86	530.863	774.81	1240.09	NA	573.791	1175.75	812.301	697.891	706.749	667.256	878.395	590.769	931.427
Qtrt1	4184.94	4300.43	3442.54	3582.19	4445.88	5092.25	4442.99	4588.42	4195.23	4628.29	4285.82	4717.85	4731.44	4232.45	4170.6	5166.99	3764.19	3314.96	3452.56	3226.53	4586.05	4862.52	2988.11	3027.53	2869.08	3833.13	3707.38	3351.01	3352.15	4118.47
Ddx10	2204.26	1923.19	2603.28	2612.46	1893.56	2037.14	2774.19	2739.05	1610.05	1933.2	1709.59	2012.3	2022.19	1826.68	1538.57	1758.41	2680.39	2345.11	2242.98	3053.51	2516.18	2200.86	2233.97	2203.68	2530.87	1678	2526.74	2330.71	2839.83	2426.26
Hhatl	NA	NA	NA	NA	NA	NA	NA	NA	922.189	998.877	370.028	1337.11	844.85	925.442	1573.92	1455.27	1077.74	1573.78	1372.96	1668.37	14813.5	15231.4	NA	NA	NA	1173.54	NA	NA	NA	NA
Wdr7	2500.12	2611.62	2484.91	2989.18	3171.42	2464.43	2514.32	2474.24	2552.02	2459	1875.24	2019.62	2272.32	2802.32	1860.49	2704.4	2310.55	2343.07	3737.84	2302.3	2698.25	2635.58	1763.04	2391.37	3095.92	2606.84	2767.67	2332.37	2862.5	2709.98
Itih1	10735.1	11447.2	10718.3	10198.1	16841.9	15625.9	13109.7	9613.79	13840.7	13335.9	10014.2	10879.7	11292.5	13037.7	8281.78	7006.37	18348.5	15313	12223.9	11464.1	16298.5	16648	26800.4	26175.6	13689	13265.4	17752.7	18016.1	15004.6	14547.8
Arl5b	669.479	NA	145.157	NA	454.005	354.524	193.037	289.602	354.874	597.409	342.372	695.743	513.73	NA	546.179	750.893	361.321	409.955	NA	783.998	323.705	141.86	353.592	425.654	726.417	428.673	313.493	646.633	NA	608.683
Adh1	51152.1	54555.4	49391	50200.1	59326.3	60321.2	45305	47617.9	56789.4	55649.3	54092.3	56447.2	50185	55958	75284	85452.2	56264.2	60096.5	55162.3	52326.4	55661	59702.6	31137.1	31939.8	37718.8	39094.8	42379	39367.2	43524.7	43078.6
Adh7	80079	90947.1	82711.3	93084.2	83754.3	90717	77705.5	79027.3	90840	102484	70720.4	73258.4	74176.1	80895.3	131286	126529	94439.3	97090.4	113436	122568	90076.4	104564	85944.6	90218.8	82056	78111.6	89850.6	98134.8	93647.1	98117.1
Apip	4543.28	5507.94	5798.49	6531.27	10110.5	6068.01	6384.69	6181.38	9964.71	8678.47	7163.54	6610.07	8599.34	10956.7	6921.2	4109.29	5815.9	4765.34	6719.24	3470.06	6583.38	5057.23	6232.27	3945.85	5420.15	5422.48	7190.54	6166.41	6656.83	8432.76
Prpf8	14764.3	15643.9	15091.5	15438.7	13824.3	14465.7	15752.3	16384.5	14615.3	15845.4	15040.6	15769.9	14785.3	15027.9	15753.5	16120.6	14796.9	14302.8	14896.3	15228.1	15525	16605.2	13197	13499.9	15806.2	16766.9	16273.8	16608.9	13567.9	15206.7
Enah	17770.7	13322.4	15012	18059.5	12987.7	13870.1	14420.1	14089	13681.8	14618.5	11311.1	12893.2	14591.9	15045.5	15754.1	16449.7	22863.5	24174.1	17739.5	21024	16020.6	16194.6	19204.8	19231.5	20158.5	17796.8	16696.7	19176.2	17570.6	18681.9
Atp1a1;Atp1a2;Atp1a3	74153.8	87033.2	77760.2	75619.7	81630	77330.4	60086.8	58647.6	75241.3	75697.3	62452.9	60374.8	78344.2	89343.1	50817.4	46122.5	107872	104872	91455.8	84684.1	69180.6	64782.7	104265	102519	82734.3	84026.9	70044.5	72645.8	75604.2	74163.3
Snx5	28024	29544.8	28528.6	29266.8	34674.9	36309.8	26045.2	25352.1	28654.7	29555.9	27383.7	26405.6	27657.9	32814.5	19035.3	19348.3	30986.1	31654.3	29466.5	25307.9	31055.6	28979.9	31867.8	32786	24272.9	23702.1	29625.3	29965.4	27609.8	30558.7
Lyplal1	5687.84	5012.59	5460.6	6002.23	8277.73	7151.11	7918.37	8053.67	9284.63	8321.89	6634.97	6057.43	9943.77	8672.28	5097.96	5854.52	5968.39	8495.93	4413.67	3333.58	3693.25	5029.19	6365.07	5837.35	5244.19	3857.82	6654.56	5985.98	4812.62	4849.42
Eno1;Eno2;Eno3	771961	702657	500585	936716	554506	581937	338348	597418	626750	802485	453384	592669	985732	712554	151253	380018	1017780	838773	982254	994590	1005430	920603	800127	1386640	693167	535552	884210	1177600	820087	805849
Eno1	569972	618094	636027	597237	582313	550347	515131	473258	579376	548563	591596	611345	643470	670548	514853	399967	621102	577566	668220	653448	552221	643951	674938	718582	564435	514701	738124	641111	766537	728937
Psen1	790.002	623.556	837.32	853.714	244.501	639.287	715.048	866.872	406.252	580.142	918.046	770.59	554.689	694.972	1030.45	991.334	2200.03	2451.19	1847.83	2318.14	1148.14	628.459	1786.18	2394.52	2333.98	2379.26	976.565	1331.37	1124.34	1599.17
Arhgef40	867.805	1099.53	1304.01	1063.94	1078.03	1100.8	723.459	703.169	1377.49	907.143	674.814	1130.8	923.288	1184.24	1006.49	621.524	709.86	512.054	1434.19	443.74	606.424	903.517	1229.64	912.95	1177.91	629.966	910.138	815.908	1517.32	1036.4
Cbr3	39741.4	37986.3	39123	44976.5	39564.2	38779.5	35112.6	36734.5	36910.5	37873.2	35854.8	36108.4	39174.8	35226.9	34128.2	33596	25926	33660.6	36042.4	36274	39608.4	34938.8	32441.9	37136.6	30627.1	28686.1	36466.1	39555.2	46483.3	44880
Mmut	7546.61	7028.71	7769.94	9826.41	7592.45	8548.56	6907.29	8667.51	7052.36	8242.64	8730.77	8951.11	9432.5	7100.71	5212.1	6217.08	9176.84	10425	6337.78	6540.32	9872.04	9308.58	7874.27	7401.87	8901.33	8870.88	7740.08	7527.68	7752.69	7746.21
Fam207a	3144.14	2531.99	2133.54	3025.67	2243.23	2748.32	2885.4	3468.66	2375.5	2425.38	3272.65	2625.94	3474.83	3020.78	2529.15	2975.78	3060.68	3366.33	2316.68	1744.17	2401.34	2802.7	3201.25	3213.29	2908.79	3029.52	2433.91	2590.34	2269.73	2806.39
Hbb-b1	267561	265000	362776	305446	523829	504010	237928	210316	331878	372399	442454	427055	348240	380400	182461	205639	141591	129169	218918	245718	176289	202172	557542	695956	440563	434778	451495	262718	1272190	1108920
Syf2	1371.57	914.813	1631.23	1683.67	NA	1105.18	1328.42	1241.5	1297.29	1331.62	1011.74	789.126	1281.87	840.788	1379.98	978.32	2210.7	1943.49	2581.79	994.785	1102.4	1091.07	1340.05	1577.55	1440.24	1160.96	1212.25	1528.28	1651.59	1680.6
Atxn3	5307.46	5949.81	4478.81	5549.59	4234.78	4474.1	5069.31	5547.48	5799.14	5573.96	5516.4	4656.86	5233.76	5701.67	5814.53	4705.51	7000.9	8004.9	6144.51	5640.72	5043.58	6062.21	6002.47	5943.96	9624.88	7432.11	4998.74	6823.68	6095.36	7212.04
Myh14	24324.3	23649.9	27703.1	27518.9	19670.8	21694.6	25109.1	25690.2	20841.5	22087.9	23607.5	20942.3	21900.2	20208.7	19077.3	19745.3	21844	24613.6	21455.9	24277.6	22585.7	20337.6	25883.2	22457.1	29781.8	28247	28632.6	29039	26593.7	29178
Zc3h13	2250.22	1906.59	2322.07	2150.6	2097.58	2266.21	2433.1	2548.87	2376.05	2540.15	2155.75	2606.32	2692.67	2275.58	1863.28	2202.88	2216.12	2225.01	1467.05	1539.21	2061.15	2692.86	2532.49	1973.36	1898.09	2106.74	2127.11	2082.74	2045.79	1961.76
Dpf2	6190.04	6916.28	6229.95	5648.54	4636.28	5523.84	6946.26	5452.67	5965.53	5920.45	5555.41	3416.36	4969.99	5213.25	4803.05	4865.41	7217.17	5189.11	5532.61	4805.83	6642.46	5568.47	6375.83	6365	7988.86	6757.07	6392.43	4615.46	6409.29	6231.95
Mea1	778.716	1128.3	776.595	962.509	1133.79	1286.47	754.757	1126.76	1470.32	1213.95	920.322	1279.29	1168.58	1087.3	433.612	817.016	1820.71	1268.14	NA	633.165	997.022	643.456	755.765	936.017	637.003	1071.34	259.268	NA	1572.94	1761.76
Add1	32450.8	27537.5	29638.7	28099	34452.4	35778.9	30378.4	33164.9	34794.3	39335.3	31429.3	30445.5	37075.9	34297.8	22534.4	19024.7	34170.6	33148.9	24626.2	26544.1	22795.9	20777.6	33995.7	37098.9	30225.5	28950.7	31581.4	32580	33044	28946.5
Lig3	7190.96	7031.97	7889.2	7842.51	6436.22	7066.82	7887.77	8129.49	7533.31	7764.17	6965.16	7930.41	6742.75	6499.8	7803.36	6813.98	6022.85	7609.82	6860.92	5867.75	6899.79	6267.21	5558.56	6338.74	8132.08	8287.23	6827.79	7829.75	6082.18	7010.22
Wdr13	4507.51	4765.21	4536.45	5351.69	5077.82	5092.73	5164.87	6273.41	4109.25	5195.3	6461.09	5517.86	4429.29	5073.21	5854.32	6192.39	4551.96	4573.72	4472.46	3759.48	5078.68	6633.67	5146.06	4610.9	5422.86	5939.13	5919.2	6681.98	5847.92	5560.7
Umps	9480.24	8878.38	9020.2	8136.05	10772.8	10205.8	10339.2	9310.38	8913.01	9562.33	8393.34	9019.55	10006.8	10132.9	8925.15	8441.46	5878.09	7557.16	5632.29	6888.27	8909.96	8949.81	6119.14	8122.76	8830.98	9027.53	7221.73	7784.47	6301.69	8433.61
Acadm	50767.4	53380.3	50692.9	55749.2	54119.3	53827.8	53676.5	55199.2	58288.3	54784.4	54115.9	59121.8	54871.2	60680	49128	51985.6	59055.6	55197.8	53509.2	48956.5	54739.9	64063.7	43646.5	53105.5	46204.8	51815.9	53117.2	54983.6	49230.3	53726.5
Opa3	4500.72	4166.83	4072.16	4882.97	4603.36	2953.84	3773.03	2890.07	3553.59	3756.33	2896.91	3155.39	2669.8	4092.97	1496.34	1431.47	2075.93	3089.54	3242.81	4050.2	3440.15	2674.08	3065.74	4030.91	1597.73	2058.91	3548.09	2410.01	3466.55	3431.86
Sfn	673723	744299	990499	907194	661238	557048	885528	710372	688567	713425	589580	587822	642273	588701	838662	775142	786834	865671	1157810	1155560	920619	943389	823601	853454	841977	876791	813336	741451	1232240	1040730
Acox3	21716	20911.4	19572	21455.3	18837.1	19366	24343.1	24635.9	19288.7	19336	23519.4	24198	20088.1	20970.7	24829	23667.5	19520	17484.1	24375.3	23670	20356.8	19713.1	18268.6	19534.4	24456.6	24186.5	21905.2	22149.6	22668.4	24557.9
Wdr47	2593.38	2585.44	2296.77	2348.85	1945.32	2417.21	2566.77	2467.85	2382.64	2286.74	2748.27	2611.13	2362.93	1833.14	5136.69	3298.38	2132.94	2127	2779.42	2594.36	2218.01	2235.95	3362.27	2455.02	3958.64	3894.02	2620.17	2551.57	2878.24	2217.48
Aldh5a1	3304.32	2349.85	3007.78	3193.55	2578.96	3036.88	2714.59	2454.93	3253.9	3024.57	3086.44	2735.38	3409.95	3351.68	4253.4	3974.72	2711.35	2374.22	2798.42	3120.43	3433.35	3132.87	2948.43	2901.42	3269.75	3197.47	3665.8	3092.92	3049.55	3540.4
Ykt6	20086.3	23241.8	20800.5	23306.2	21624.8	22142.4	20066.8	21697.7	19429.4	23424.5	19266.9	24087.3	21668.7	25645	15098.4	16462.9	18097.8	22884.7	19327.1	23544.9	20862.8	25339.1	21163.6	17697.8	20300	14998.9	20571.8	21457	23146.4	21575.3
Bloc1s4	1205.29	1339.86	1663.16	1440.89	1417.14	2269.72	1317.93	1338.98	1678.18	1644.33	1550.98	1882.55	1404.51	1839.06	1459.88	1167.18	1476.39	978.695	1507.25	1286.06	994.563	1240	1091.67	1369.94	1314.15	513.098	1086.92	321.289	1610.56	1385.54
Slc25a5	403458	407112	374874	392968	362913	349414	397610	378176	399413	371675	373017	365984	317171	328732	455175	355678	373661	347903	513631	489788	390970	431633	388020	363597	394108	425994	419157	444766	402321	403466
Slc25a4	91819.1	86818.2	73297.4	73492.2	74065.8	69137.3	72041.6	67806.1	101995	92883.3	93211.8	81384.2	94219.8	85887.8	101310	86146.7	111620	91354.3	88085.4	80709.5	233008	228920	74074.3	68462.3	75351.6	81927.9	67927.6	69410.8	67215.5	61354.5
Stxbp3	11162.6	10946.3	12781.4	10955.4	12928.5	11934.2	12383.3	12852.7	11528.7	10827.1	11181.7	12066.1	12667.9	12709.4	11940.1	9930.13	13124.5	14107.9	11212.9	12186.3	14351.3	14661.6	13986.8	14790.6	13069.8	13396	14129.8	15249.7	11926.7	12130.7
Ndufv1	25957	22640.9	23500.8	25461.3	23918.1	23795.5	24775.6	24391.2	24539.2	25349.6	26903.1	24952.6	27544.9	26700.6	24966.1	23332.3	30518.1	28306	22932.3	21884.1	39209.1	37451.8	23988.2	25340.1	26666.6	24934.4	24737.1	26172.5	24323.2	26566.3
Rabggta	5799.16	5950.41	6691.81	6957.51	5596.78	5853.17	5931.56	5976.61	5606.08	5967.49	4903.78	6077.6	5910.03	6133.44	6432.45	5559.26	5117.22	5824.87	6088.22	5148.73	6606.53	6660.24	5212.84	6233.7	5718.15	5241.99	6365.92	6337.63	4866.84	5670.82
Chd4	21643.9	21147.8	21566.7	21331.9	19708.1	20524.1	21516.5	22052.1	20482.1	22665	20326.5	20934.5	20039.7	20710.6	20866.8	18945	20491.9	22959.3	20340	19972.7	20600	18516.5	18845.1	20363.1	26498.1	24860.2	23867	24408.3	21299.4	24575.3
Anxa1	441244	439315	476118	485165	465519	454663	475663	477565	449445	438076	391220	416242	405080	393801	299294	312525	516796	489159	630521	650115	496237	512710	534479	547058	426812	430179	440012	453638	545771	525970
Myh1	1003.19	1094.13	2075.31	2056.58	NA	NA	6002.22	7713.75	75633.6	75209.8	101809	105098	121508	132327	89820.4	98435.6	195989	204887	133642	154649	1170100	1207800	2423.47	2824.99	73715.9	71026.9	3710.71	4532.65	3892.85	2537.43
Myh4	NA	NA	1993.47	NA	2979.11	NA	5354.31	NA	108667	99888.1	169853	158067	33680.4	24749.8	22144.9	18617.4	96780.8	84399.5	19795	20516.7	85445.4	72447.5	NA	NA	7661.05	3963.51	7026.94	3686.94	5220.83	NA
Cotl1	57620	66107.9	59619.1	58380.6	72814	67759.3	68333.5	64247.3	66245.8	63514.9	53498.5	62032.9	62797.9	75497.4	46891.4	51752.4	75530.9	76163.5	83257.2	67406	85558.2	81369.2	87593.5	85816.7	57088.3	60414	71064.4	69621.9	68901.8	69398.1
Ccar2	12132.9	11887.1	12647.8	10148.7	11615.8	10826.7	12907.4	13629.6	13506.6	12552.8	13617.2	12997.5	9700.03	12155.3	15262.3	13659.7	10975.2	10693.5	9664.87	9547.79	9148.49	9674.67	9674.15	10818	11388.9	12694.1	11121.3	12143.8	13032.1	12064.7
Fto	2055.96	2490.47	2768.62	2531.55	3499.52	3013.27	2570.29	2405.88	2372.28	2670.4	2499.85	2456.81	2797.36	2739.46	2542.54	2239.83	2360.51	2091.75	1981.84	2001.41	2145.46	2237.74	2045.99	2226.63	2123.04	2867.4	2169.22	2611.94	2365.13	2123.56
Smg5	405.835	418.463	355.881	293.218	531.718	702.222	439.574	464.215	528.353	644.932	323.271	267.39	282.685	188.125	145.23	248.179	NA	1565.01	400.225	305.314	337.45	656.408	675.103	618.948	752.802	268.661	475.413	418.729	328.956	563.635
Rida	4706.71	4444.93	4957.5	5423.98	5154.56	5047.28	5169.65	5295.28	6269.3	5078.76	3745.29	5006.89	9318.78	8671.41	4582.79	5037.39	3112.19	4968.6	5744.15	7016.2	2384.31	3593.94	5469.57	5520.31	3810.7	3492.85	3859.55	4959.28	8285.79	9179.35
Ankrd49	1236.2	828.127	992.9	955.501	1206.94	822.85	528.188	1715.94	1103.72	744.43	552.341	1131.04	1000.91	1285.81	932.314	1332.08	1007.65	361.446	635.714	NA	1030.45	460.004	1005.56	1417.79	361.284	725.916	734.38	1346.58	1058.45	1597.05
Usp15;Usp4	7932.64	8616.01	3539.21	7121.28	8169.89	6997.65	7861.88	5681.14	9118.82	9548.85	9280.31	9705.16	8064.83	10203.4	6297.48	7360.95	4744.49	2867.62	7013.47	5822.64	10090.7	10077.6	5417.45	6727.62	5820.55	6311.17	9108.86	9838.54	6021.54	6135.68
Atp9b	2835.64	2523.99	2446.86	3058.43	3036.64	2936.63	2035.72	3013.28	2913.31	2729.24	1975.17	2740.15	2271.46	2803.17	2251.47	2364.75	2984.56	3041.9	3984.62	2672.36	3380.15	3177.06	4224.82	2800.08	2766.51	2621.52	2917.23	4185.24	3004.22	3344.79
Ube4b	5027.39	4731.86	6203.92	5466.34	5706.73	5760.07	6515.45	5438.65	5857.54	5314.3	5009.63	5192.82	5332.53	4878.74	4051.6	3827.1	5268.56	5183.41	4413.08	4123.45	5983.37	5383.13	5082.57	5189.64	5134.61	5118.28	5506.78	5125.9	5693	5186
Gnb1	10633.6	10519.3	16765.8	11228.1	11547.9	13228.6	10936	9846.96	12446.8	15937.7	12680.8	11737.3	15725.7	11380.4	8888.97	12050.5	18035	13843.8	12976.9	14227.1	14821.6	12339.3	18905.4	16465.5	16265.3	15417.1	17448.4	17830	16236.8	17658.5
Arhgef12	9036.33	8204.39	9082.86	8782.09	8802.74	7909.09	9158.6	8087.97	9033.18	7204.15	8374.59	6755.41	8653.18	8676.16	6374.95	6250.71	9110.08	7773.89	7835.79	7162.87	7561.74	7195.08	7898.83	6585.71	9898.42	8558.12	9081.15	8914.77	8238.97	8080.06
Fscn1	7460.5	8550.92	8558.81	8972.41	12413.4	12850.2	9014.11	8155.59	12609.6	12872.6	7437.37	8587.66	11871.1	15032.4	4190.23	3772.81	6401.06	6216.73	6111.18	5907.18	7151.15	8888.15	5074.58	6000.7	3749.16	4441.44	4392.78	5352.54	5307.95	5980.74
Itgb4	54403.5	56574.7	54127	55936	43092.4	43553.2	49611.6	50056.4	47113.4	47562.3	43047.5	44438.1	43244.5	42395.5	48690.2	42089.4	58898.3	57204.9	62341.7	65441.1	50695.1	51374.8	51077.7	54038.4	60942.8	58553	56375.7	56296	52417.9	53959.6
Ivd	17323.5	18096.1	15761.4	16648.6	19901.6	18630.5	18313.5	18828.6	22851	22278	19743.6	21630.6	24798.5	23318.3	21660.8	18754.3	19816.6	21099.3	16534.7	16966.5	20527.5	21062.8	20271.4	21554.8	17925.7	21492.3	21177.2	21695	22110.7	20632.6
Esyt2	9307.03	8744.29	8587.51	9937.96	9548.37	9164.84	8701.23	9681.46	9096.76	9269.8	9270.54	10565.7	9182.45	9865.7	8167.17	8290.17	12184.3	11304.2	6585.72	7938.3	9751.63	10070.3	10630.2	9633.48	9843.7	9360.24	9183.51	9884.66	8226.74	9446.46
Ttc38	10925.5	11248.1	11183.7	14242.6	13319.7	14236.2	12835.2	14498.2	11535.6	14981.5	13002.1	12100.2	15818.2	14478.5	10897.4	10198	11041.7	12482.4	10973	12550.2	12050.6	11679	12292.7	13844	13996.7	11676.5	13549.2	12275.4	12854.6	15457.1
Mrc1	27890.3	27122.9	24513.8	26114.2	34556	34308.7	27541.8	26615.1	29659.1	29116	24392.6	23497.8	24686.1	25328.8	24484.4	21016.6	36044.2	35499	27188	29136.4	38922.2	38001	33351.3	29376.9	20195.9	22191.8	32718.6	33456.9	27435.8	28138.2
Itga6	42964.8	43030.7	41946.3	44267.3	34978	34364.9	38617.2	39234	37525.2	38431.9	38223.7	37423.2	31649.5	34854.4	42029.7	40464	46786.7	45908.9	50646.8	50512.3	38061.7	42079.9	38757.4	40314.4	48860.8	47838	45678.9	47326	43612.3	43967.8
Vars1	30441.2	29806.2	28240.8	28816.4	28880.9	27823.5	28490.3	26775.3	29642	28654.9	26888.4	27439	30481	28418.8	23672.5	24245.6	26351.2	27187	31320.1	27276.5	32278.3	28685.7	25808.2	26481.6	28449.8	28269.8	30745.9	29742.3	27174.3	26851.2
Gnb2	22180.1	18465.4	18677.5	20789	18539.8	19036.4	22125.6	22063.4	24270.9	24841.3	18054.1	19154.4	22711.5	17412.1	16139.6	16741.3	20143.1	25651.3	22803.4	23212.2	27225	22689.9	28894	27357.9	20012.3	18835.5	25643.2	23838.3	25270.3	26062
Vwa5a	66201.2	60385.1	66453.5	58476.5	73551.6	75164	57797	55644.5	68762.7	66047.9	63494.3	55150.9	65173.5	68523.7	45626.9	46277	53944.4	56828.1	59277	58709.8	60817.8	62243.4	65114.1	65918.6	50862.5	55478.1	65859.3	70256.3	62472.3	63624.5
Carmil1	6061.4	5513.53	6416.19	5821.18	5659.26	5911.32	6413.27	6659.62	4959.33	6026.59	6400.58	5322.93	5578.63	5768.5	4476.16	4629.37	5371.92	5142.95	4125.33	4396.01	6218.08	5315.37	5801.59	4934.24	5953.15	6364.74	6808.02	7238.17	6227.93	6804.45
Vat1	128955	137808	141319	135784	148248	137308	137906	133996	140277	138473	137782	130383	140438	140480	142629	135372	124590	127472	144228	149459	137713	143199	139271	143825	137944	134042	141014	140977	180871	172476
Lgals1	80105.7	88696.6	95176.1	90937.1	113623	120730	107592	106341	152974	168447	97373.3	98431.4	123655	134463	55616.4	47577.2	72142.2	80721.1	72961.2	79854.6	81673.1	91152.9	92669.3	128570	57682.5	55292.2	86472.7	89725.1	81679.9	86081.9
Paics	26121.9	27555.1	26876.5	24611.4	27135.2	25337.5	25083.3	25178.8	30555.5	30775.6	22507.6	21240.2	29662.6	29689	18876.7	17612.1	29688.2	32294.7	31688.2	27554.7	26214	26261.7	25408.9	28576.2	23172.9	24351.3	26858.5	25507.1	23446.2	26757.7
Egfr	11282.3	11186.6	10996.7	10926.8	13797.9	12787.9	8748.67	8606.9	8907.15	8696.22	8437.26	8001.5	8914.32	8479.99	9226.58	9885.01	11252.6	11366.7	10723	10684.9	11562.3	10309	9358.46	7734.91	7917.78	7390.39	7853.87	8038.48	8083.84	8797.43
Hgs	16911.1	13295.3	16403.7	14951.6	16763	15513.8	13509.2	14234.9	16124.4	14360.5	13018.8	13429.2	13490.2	13424.7	10600.3	8818.59	13720	11897.5	12474.3	14218.4	14980.2	13490.9	12832.9	11455.9	12070.1	12086	15985	12222.2	12242.1	12075.7
Arrb1	5119.36	7652.75	6608.87	7259.38	6386.53	7908.73	6075.29	5980.13	7496.15	7158.04	6296.75	6551.37	9286.85	9971.51	5238.56	4996.29	7925.68	7803.92	6316.6	6300.82	5702.66	6804.98	7695.5	7171.91	6752.27	5498.16	7970.19	7098.52	7656.18	8924.62
Myo5a;Myo5b	3876.91	3977.59	4186.1	4356.46	3361.98	3936.96	3657.85	3808.37	3135.21	2829.86	2648.9	3199.7	4297.75	3143.87	3039.1	3265.21	4701.87	4759.01	3222.61	3489.93	5313.29	4517.86	4653.51	4410.6	4675.73	4594.38	4231.52	5070.94	2961.06	3088.1
Cyp2j6	1545.29	1933.59	1778.37	1296.73	1823.99	2062.77	1778.66	2008.29	1836.75	1733.1	1913.73	1860.07	1687.17	1927.94	1975.97	2055.61	1289.24	1778.8	1516.72	1230.61	1077.94	1480.49	2251.52	1664.62	2742.5	1631.5	1509.64	1506.84	1819.46	1578.13
Ctsf	1570.25	2277.38	1323.5	2372	2501.71	2736.91	2036.05	2167.87	2990.12	2612.12	1074.11	3925.3	2114.79	2253.2	NA	2164.39	NA	2458.11	1485.49	2162.91	1911.54	1640.72	NA	2433.09	NA	1954.19	1719.21	2883.97	2585.24	2701.81
Psmc2	47484.8	45258.1	47834.2	46438.4	44707.8	45108.9	48005.6	48956.2	44879.9	44614.1	45388.9	43326.6	41851.8	42677.1	37060.8	35653.8	43036.3	47089.1	47545	47623.9	50670.4	47499	46037.2	43817.4	48724.7	46626.4	49141.3	45046	47961.5	43693.1
Actn4	212287	220946	232876	232291	195554	206932	210519	206263	195185	201139	181396	184050	184001	192934	169495	153012	282733	276103	245382	267441	237044	235123	244323	249185	229356	229027	240110	229384	242012	240975
Actn2	NA	NA	NA	6892.04	NA	NA	1156.65	915.532	22630.1	23644.2	30873.9	32333.7	24693.2	26162.1	24346.7	27258.4	41388.9	40461.8	26695.5	25972.2	328521	316201	NA	NA	12185.8	11061.5	NA	NA	NA	NA
Actn3	NA	NA	NA	NA	3234.65	NA	2973.06	NA	15022.6	15593.1	21630.4	23671.8	15680.1	17804.7	5690.16	5505.27	10891.9	8416.84	11369.6	12915.8	123215	118719	NA	NA	1722.52	2002.54	3414.25	2719.78	2330.1	NA
Kbtbd11	659.856	763.778	659.779	958.425	1019.49	832.203	737.551	592.98	689.449	777.612	825.596	821.232	1018.43	737.738	1762.3	1057.27	1041.51	1085.58	1717.09	1161.41	939.476	1078.46	1286.89	1947.26	1326.78	1666.88	998.191	913.148	1096.45	1713.62
Akr1b8	9857.64	14524.8	13266.6	15197.9	16649.3	19211.3	11407.1	13041.7	14191.1	18661.3	12888.3	15342.2	12829.3	16680.5	17741.2	19921.8	13142.6	14931.6	15683.1	16037.3	20582.9	23195.4	14512.5	15463.8	11193.1	9360.27	10781.5	14745.9	15454.3	15786.2
Recql	2355.48	2269.05	2292.18	2511.77	2318.34	2568.68	2647.54	2584.02	2411.17	2874.26	2079.01	2373.62	3020.32	2760.65	2525.33	2919.38	2939.29	2572.38	2403.65	2863.4	3132.39	2644	2534.4	2380.95	2853.55	3231.41	2623.38	2923.13	2474.71	2736.52
Glul	30032.7	27400.7	23692.7	27853.6	35684.2	31159.9	23972.1	22494.7	32786	37262.9	26813.3	27824.2	45555.3	41202.3	18467.6	17254.2	29605.8	29885.6	29013.3	27648.1	34842	29851.5	22239.8	22132.9	23529.6	22387.7	27591.2	24795.1	22913	22203
Pttg1ip	3987.37	2587.99	2591.41	2980.38	2715.43	2920.37	2713.7	3076.22	3741.21	3239.55	2321.4	2632.33	2886.34	3641.22	2009.49	NA	3021.1	1684.06	NA	NA	6980.46	NA	2462.39	NA	NA	NA	2262.64	2708.3	2765.11	2157.17
Eno2;Eno3	NA	NA	NA	NA	NA	NA	NA	NA	NA	NA	NA	NA	387.064	NA	1486.85	NA	NA	NA	1185.74	NA	NA	NA	NA	NA	NA	NA	NA	NA	NA	NA
Gnb4	NA	NA	229.573	NA	2112.28	973.274	667.259	NA	1847.63	1243.06	NA	NA	NA	NA	NA	NA	716.561	NA	NA	NA	NA	NA	NA	1143.7	NA	NA	1220.56	NA	NA	5952.63
Ap2a1;Ap2a2	27392.3	26675.6	26817.5	27299.4	32689.5	31507.4	21511.4	27167.4	32788.1	35214.9	24252.9	25058.3	30449.5	29147.1	21875.7	19748.5	22292.7	24354.2	18291	23218.9	21345	24242.6	13437.6	15214.4	14108.1	17146.7	30340.9	28722.5	22961.1	26981
Rpa2	8046.23	12015.2	12501.3	9579.6	12332.1	12069	11205.3	12033.6	14031.8	13236.3	10047.2	13001.5	7990.39	10882.6	10442.8	8399.42	13645.6	11644.8	11657	12313.2	10979.1	10437.3	13397.1	11051.3	9431.44	12934.6	6788.71	10158	10640.4	9704.99
Tbc1d10a	7475.49	8422.56	7404.01	7734.32	7467.46	8018.9	7301.9	8224.98	6285.06	6035.63	7634.68	7444.03	7422.18	7678.94	7926.6	7344.6	5139.06	6568.21	5107.74	5393.27	6282.4	6895.66	5683.12	7462.33	7921.99	7412.83	6368.13	5883.37	6787.48	6942.38
Itgb2	5700.24	5189.32	6742.77	6079.86	7186.96	7154.04	5097.23	5053.74	4841.01	4777.71	4924.24	5858.85	4317.96	4343.72	4358.35	3710.46	11815.5	13454.1	13465.4	13736	17149.7	14173.6	13649.4	12271.2	5456.38	4919.27	6748.39	7003.68	5535.52	7831.36
Rps3a	243285	292688	288212	300720	231972	251360	282248	284115	236614	252219	405237	356380	219139	241719	265756	254830	257096	303372	306246	307366	357032	393126	240876	260861	253901	250059	293363	296129	252440	282355
Flii	13706.8	11959.8	13266.8	12214.9	12126.5	12238.7	9836.49	11143.4	11083.9	10067	10684.4	11816.9	11340.9	10017.6	11873.6	11986	9673.13	11182.4	13035.2	13004.4	13543.1	13117.7	11349.3	11344	12439.8	12293.8	12298.2	12463.2	13171.4	12580.8
Trex1	4688.58	4150.08	6996.14	5963.88	3924.53	7274.89	3937.01	4568.23	2579.15	4316.24	2235.6	6503.08	2953.72	4553.66	3335.47	2870.17	4892.76	2529.72	7949.07	7962.58	4549.9	5620.36	5596.05	5076.23	2038.06	2902.25	4731.56	5892.62	7648.4	4921.95
Itprid2	6962.28	6139.48	7847.71	7037.86	6350.6	5808.8	7958.22	7862.06	7032.58	7221.48	8053.4	7121.28	7432.05	7061.37	6671.84	6791.56	7024.16	6582.81	5765.55	5273.63	6072.83	5960.28	8312.65	7587.51	8933.58	8235.36	7816.33	6850.72	7349.55	8444.88
Pdlim5	26787.1	32350	35949.7	36552.6	35262.3	33350.9	34148.2	33698.4	36633.6	37133	35052.3	38705.9	32205.7	34236	31730.3	36737.7	44766.8	48576.1	46325.5	42793	60416.7	66487	37069.4	39040.8	44828.3	46386.1	44865.8	46111.4	45070.7	43293.8
Cct3	67659.4	62626.2	70027.2	70614.6	61758.3	65242.9	66396.8	67635.4	67001.2	69373.1	69625.1	66157.5	66888.4	61783.9	68817	64720.9	59967.2	62251.4	69677.3	73130.9	84004	74580.9	59448.5	56653.1	71375.8	70205.1	75574.3	75699.7	68260.3	72726.5
Acacb	3990.86	4051.85	6103.49	4426.13	5036.24	5185.06	4888.19	4660.43	4837.37	4639.16	4423.57	4326.86	3435.8	3082.7	4076.02	3600.12	5303.19	5373.43	4055.87	5032.12	5528.21	4401.91	1634.42	1365.42	3260.17	3382.24	2602.54	2529.94	2601.42	2028.84
Ktn1	13173.4	13471.5	12647.3	14037.9	12107.5	12068.1	12707.5	13580.2	11192.7	11688.9	12000.2	11977.2	11381.5	11832.5	8098.63	8515.02	12304	12421.1	13469	11877.8	12804	11843	12488.7	11370.5	11918.9	11611.3	10372.5	10733.4	10724	12030.7
Prxl2b	23967.3	31867.9	30273.8	29896.2	29298.6	30592.3	30753.2	31225.3	29123.9	30301.9	36419.5	32873.1	29990.2	32740.4	57973.7	50054.6	22757.4	21872.3	35568.5	33078.7	31587.2	34147.1	28841.3	26505.5	35835	34781.1	33517.2	30155.2	38364.8	33132.9
Rps3	378431	402285	413143	413980	352885	335127	408504	383291	371937	332374	351642	330947	280014	310907	367735	329811	424965	367670	465101	475347	423863	425918	383889	394810	403808	399606	452758	423308	420472	381192
Actr1a;Actr1b	55914	58737.3	52383.5	53314.3	66386.8	59703.7	57246.7	55560.7	74904.9	76035.8	56313.6	58868.8	58158.4	63217.9	77907	77088.2	42771.2	44922.9	56227.9	56370.6	51762	58827.2	41411.3	45990.3	50687.4	51838.9	69306.2	68873.7	62102.3	61512.5
Jph1	NA	NA	NA	NA	NA	NA	NA	NA	921.73	325.753	785.155	872.12	289.228	622.097	NA	NA	448.989	762.136	202.094	NA	6006.61	5915.67	NA	NA	NA	NA	NA	NA	NA	NA
Cbl;Cblb	3515.96	2089.81	2051.78	1351.39	3100.52	2373.7	2299.57	2221.02	1743.46	2183.73	2965.36	3538.25	2404.87	2708.26	2173.66	253.623	1387.52	3003.38	1974.6	2240.53	3187.81	6607.95	2034.28	1634.48	2261.17	2033.34	695.758	1726.94	1841.63	1311.73
Ank1	2190.25	2235.46	3129.4	2327.49	4189.16	4491.66	1989.81	1716.52	3079.88	1672.64	4293.69	4199.53	3469.35	3380	1508.9	1078.35	2109.32	1682.14	3259.03	1562.68	2429.48	2140.12	3687.09	3468.13	3763.46	3333.11	4894.95	4342.84	5385.1	4647.91
Dhrs7	27310.5	36057.9	35702.6	42953.4	33207.8	37281.2	37604.1	38186.3	38753.6	34526.6	35506.9	34162.8	28859.6	32456.5	28369.5	25766.4	30678.5	33910.2	26943.8	24491.7	31253	35862.7	25353	27243.5	26695	21893.6	34844.9	31409.3	26589.4	26755
Erlin2	27297	25392.6	26076.1	24635.7	24340.3	25587.5	27205	29695.9	27483.8	28921.2	26484.9	24770.2	28217.6	26312.2	22334.5	19894	23714	24158.2	23273.4	20446.9	29006.7	25499.4	25401.6	23214.4	26192.9	25405.2	30160.2	28521.1	23919.9	26878.5
Dync1i2	32018.5	32904	30203.1	39428.3	30173.6	28168.5	33040.4	32478.7	30455.3	28170.7	30866.9	40934.4	32003	26953.1	36177.9	31608.9	42097.2	55697.6	39973.7	47532.2	29847.4	36287.9	42451.8	50079.4	57559.5	58408.3	48103	53449.4	54880.1	51696.4
Myh7	NA	NA	NA	NA	230.002	NA	NA	NA	10647.4	10116.5	8963.25	8107.98	12620.6	12001.1	2014.29	1983.44	2544.74	1179.15	1723.67	2726.05	50182.6	46121.2	423.298	NA	959.041	1347.87	NA	NA	NA	NA
Ncbp2	7666.96	7229.17	7812.78	7831.39	8153.55	8483.16	9302.93	8546.74	8448.56	7272.8	5640.76	6368.75	7317.03	8690.24	6494.84	5428.52	8879.39	8703.11	10506.7	7241.38	6390.17	7787.78	7168.57	9694.02	5702.98	7819.25	7421.34	7415.07	8010.56	7084.31
Dkc1	16109.8	16879.3	16269.4	15717.8	14614.2	15625.2	17782.7	17130.2	16558.9	15688.3	17059.7	17054.8	17220.9	15169.8	19333.4	17419	17039.5	18878.9	17781	18969.7	17373.9	20299.3	12259.2	15406.2	19387.1	17670	20659.5	19063.6	16850.1	15960.7
Anxa5	393827	409292	414347	393381	413729	423430	408401	397900	453857	428489	430114	427298	417502	419716	363924	323284	408037	387311	397281	409719	403131	424665	364521	364842	360391	369018	374942	366632	396038	388956
Mtrex	11457	11134.2	10756.5	11080.3	9162.96	8757.08	10363	10529.9	10293.6	9149.65	10243.1	10288.3	8593.03	9823.64	8587.36	9442.77	9332.72	10304.8	12218.6	8660.75	9647.39	11062	8178.12	9826.39	11411.8	10725.8	10870.1	11360	10009.6	9654.27
Eri1	929.045	1458.61	1207.69	1294.99	1696.35	1091.25	1432.4	1576.95	1311.74	1542.65	1608.51	1437.91	973.155	1081.55	1942.2	1908.69	1362.95	1439.35	2060.87	1265.25	1466.25	1516	1197.87	1320.74	1882.21	874.653	1311.49	1111.52	1042.87	1440
Fabp3	2877.3	2887.72	2123.89	2158.89	5057.19	3659.96	3652.67	3531.42	9174.35	9306.95	8261.76	10031.1	7930.91	9256.61	8898.74	8823.61	5099.75	5690.88	7469.91	4445.1	23806.3	22351.3	1784.83	2898.08	2857.42	3943.78	2782.33	2251.02	3266.15	1996.94
Cask	7512.39	7229	7241.92	6298.28	6472.83	7442.87	7699.62	8029.71	6990.29	7452.85	7036.67	6977.68	7335.71	6727.66	5903.93	4932.46	5299.84	6018.99	5224.93	5322.81	6698.86	6692.67	7025.8	5428.55	6691.06	7062.63	5576.63	6443.33	6103.55	6388.49
Atg3	11479.2	11999.8	10432.9	13011.6	13768.9	15116.1	12085.9	12951.2	12056.3	12501.6	11034	12986	12670.4	14231.1	11004.2	11384.3	9791.3	10950.5	10808.9	9099.6	12307.6	12182.9	12019.8	11590	11807.9	11239.2	10029.5	8890.24	12995	14058
Acot2	9303.66	6144.51	9694.74	10266.1	11630	10177.8	8068.25	9245.33	7488.97	9685.22	7635.9	4819.1	12284.9	8047.29	6227.63	5047.51	7271.15	9036.31	7734.7	7174.85	10705.5	9279.72	7683.15	7841.36	7003.52	9458.08	6974.74	5642.61	8692.6	9769.54
Snta1	4773.18	4608.42	4537.7	5090.1	4187.35	5107.21	5073.34	4667.65	6155.09	6860.45	6092.7	5048	5330.47	6797.73	4313.39	5465.25	7289.28	6810.11	4648.23	6148.42	10769.5	11514.7	4741.74	4005.05	4408.55	2960.49	4331.01	4750.84	5281.78	4822.96
Ece1	6603.6	6227.59	7289.96	5493.87	5195.65	6063.43	5116.31	5909.83	5535.08	7133.11	6091.28	4971.75	6912.04	6043.65	3799.72	3126.03	4496.08	5360.52	5271.35	4502.97	5081.92	4334.4	6500.29	4150.43	4229.75	3595.33	4977.13	3879.68	6258.89	5882.62
Ppp6r2	902.782	826.621	841.51	1280.04	645.554	898.267	1141.74	1096.74	786.644	741.282	896.207	804.671	946.338	918.905	551.447	808.948	1377.3	683.582	1664.42	NA	910.369	682.085	615.295	500.01	816.255	717.16	1069.34	575.473	897.338	419.566
Vamp2;Vamp3	17639.2	17442.5	11842.4	16783	7067.76	14483.4	9386.58	13434.7	12465.9	16378.3	7049.54	7483.14	15512.5	14432.3	5948.23	8063.57	14153.3	15955.3	13055.6	13852	12990.2	12719.9	15810	18740.1	15646.4	13863.9	9048.47	13236.6	18641.2	25392.4
Jmjd6	1185.02	1411.24	929.231	1191.03	906.809	1122.01	1303.91	1105.21	949.359	1267.7	1076.04	693.613	1146.33	1006.98	662.807	667.072	662.168	1380.92	1410.72	773.494	1490.06	968.639	1612.72	865.73	1026.22	1211.07	822.76	860.099	1284.3	694.301
Krt1	1894760	2006380	1959110	1959320	1478420	1600680	1172350	1143800	1056750	1142080	1622050	1521510	1244400	1360330	1908940	2257160	2574530	2574160	6284030	7138130	2928460	3051600	2491670	2268720	2470880	2531830	3020380	3165800	3283720	3212950
Ltf	4523.89	4264.06	6813.15	7863.75	1405.99	1697.28	1309.44	1574.23	1777.53	1646.11	935.503	707.226	NA	894.292	899.168	922.557	45995.7	42564.4	61519.9	57667.3	65683.7	59741.8	NA	1410.66	NA	NA	NA	1530.28	NA	1855.04
Exosc5	4598.23	4610.6	4966.22	4399.45	4506.13	4745.06	4436.98	4657.05	6118.03	5118.18	4527.19	4448.83	4769.36	4867.3	3395.04	1899.14	3881.14	4601.92	4851.6	4265.3	4879.14	3867.78	5908.39	4062.28	6276.11	4788.09	5028.8	4501.39	5432.87	6421.06
Ccdc115	853.179	521.567	840.131	1331.18	1039.27	840.154	530.549	503.234	1170.12	846.87	829.259	721.409	1093.18	358.579	573.112	563.434	1093.47	509.924	NA	NA	769.142	442.436	845.055	1101.78	565.309	1059.74	NA	NA	1153.8	609.383
Gorasp2	14318	15306.9	15830.1	12530.9	16809.7	13522.3	11047.3	12609.2	12129.2	14457.8	10610	11013.9	12639.2	12917.2	8980.58	7937.52	9154.86	9777.1	8086.16	10829.8	8712.53	10212.2	9250.34	7983.58	9027.58	5993.68	10662.5	8495.48	8950.71	12422.7
Ahsa1	24407.1	24410.1	25973.1	25280.4	26778.6	25750.7	23650.8	25821.9	25611.4	25455.5	20502.1	22773.2	22233.1	25946.5	16370.7	14548.5	27226.4	25399.6	22941.8	22143.7	24701.6	23581.4	24314.2	26547.1	23702.1	22817	27709.6	28108.3	23940.5	24696
Tufm	72449.7	71240	69395.8	76911.4	73672.3	69901.8	67373.8	67111.6	68741.4	70047.6	61038.5	64053.4	68993.2	68550	62698.6	66129.9	82534.7	80824.7	75923.6	78053.7	78931.1	84192.6	76020.4	75684.4	78690.9	73831.3	76178.1	76223.3	71928.3	73277.5
Itih4	10708.3	11417.2	8177.58	8281.41	13380.5	14231.1	8119.6	7856.36	9989.23	8645	9618.33	10449.4	12657.7	13801.6	7534.71	5056.09	15317.4	16646	10713.4	10704.1	12392.1	10692.2	14628.5	13939.1	11554.8	10670.7	11906.7	10544.7	11956.3	12174.3
Tmem160	3691.56	3267.7	2897.95	3591.82	2801.59	2744.55	3502.69	3433.09	3192.75	2176.65	1074.72	1522.59	3846.79	2717.71	3549.66	2465.99	1974.67	2498.61	3175.01	3276.2	2256.7	2964.32	1836.69	3886.79	3821.78	4711.17	2550.93	3871.11	2073.54	3906.62
Fbxo6	8618.14	10016.7	11275.9	8992.73	10225.2	8322	9999.05	9881.33	9847.86	10710.4	11383.7	10451	10174.2	10732.5	10173.7	7163.69	7962.05	10029.8	7530.28	6020.9	11628.6	7834.57	6933.65	8951.71	11021.7	11690.6	13568.9	11920	8490.24	8041.46
Myof	35583.9	38686.1	36511.3	38250.1	33576.3	36196	36455.5	37634.1	33263.5	34054	30388.6	32831.8	31522.2	34153.4	35417.1	32203.9	41769.1	41848.9	39477.4	39464.3	38914.1	39443.7	37385.3	40293.7	40122.3	39736.8	43297.1	44281	37354.3	37265.2
Septin5	19813.1	22174	21697.4	22901.4	21128.7	20263.2	24047.2	25513	22641.9	20570	18978	23227.9	19194.6	20231.3	21017.2	17599.4	22885.3	26322.5	24275.9	21911.6	24315.2	28257.9	21901.8	23053.8	24845.7	25609.6	28981.4	29412.4	24689.5	23402
Isg20l2	37957.1	44822.6	60746.6	38334.5	49211.8	35625.5	42690.5	42765	40932.9	39720.7	42790.9	37974.1	38077.7	45406.9	30335.2	26552.4	37426.3	31528	14512.1	58599.6	32135	30064.3	28751.7	40097.9	38178.4	28416.9	44870	44291.9	17867.4	21135.2
Zc3h14	2521.41	2176.65	2489.5	3204.53	2162.64	2928.25	2754.4	2760.02	2784.03	2756.13	2368.2	2526.29	3061.39	2599	1423.41	1411.83	2349.03	2526.63	2145.73	2033.95	2588.42	1827.05	2729.04	2479.71	2570.34	2495.78	2379.86	2412.92	2542.42	1602.41
Asah2	294.694	887.462	653.453	4383.57	1409.7	1329.46	1885.45	1872.1	1504.03	1683.46	1318.76	1528.03	1470.88	1910.14	742.753	1302.55	1662.97	1595.23	2283.02	2039.17	986.379	1633.86	736.702	1764.04	909.465	937.743	2150.24	2244.11	485.862	2433.18
Scp2	20709.7	23028.6	25700.1	25298.7	28715.6	28407	22624.2	24014.8	28024.3	26392.3	26941.6	26726.3	24547.7	26308.2	32035.1	33945.9	20793.9	22789.4	31937.6	30857.9	20626.7	21888.6	22326.6	27171	24930.6	22719.7	22435.4	24092.9	33551.7	34648.1
S100a16	31892.6	43917.6	47021.5	52798.1	44322.4	53340	42078.2	46696.6	48529.6	49493.1	52535.7	49572.9	41224	39624.8	24867.7	24598.3	29357.3	27169.2	26637.8	57853.1	34534.8	34644.1	34488	36115.1	24593.7	22024.7	27086.1	29007.1	36543.9	44984.3
Rps2	286828	284144	286048	293607	246431	271094	266703	280305	240600	252792	256228	284119	232964	249005	218242	238448	239625	233188	319050	324736	246417	281216	227341	226235	274515	293602	296085	302922	260394	264140
Col1a1	1326440	1201290	948490	949702	1483690	1447620	760767	648044	998824	1052350	439333	425761	488275	461605	424163	377709	364142	391645	375134	427475	364511	396249	114086	111147	191559	175156	133437	128475	159312	167913
Wbp11	5692.86	4612.34	5068.1	5195.38	5492.42	5263.64	4701.98	5362.12	6205.57	5561.01	5381.85	5247.26	5003.18	4670.08	4176.64	3666.96	5455.06	4531.09	3261.4	3861.15	4115.27	3708.91	4096.57	5846.68	4920.8	6407.86	3893.71	4955.76	5145.58	4886.58
Nes	2972.15	2375.13	2653.78	3665.39	2862.09	2835.63	3140.06	2961	3200.44	3375.52	2926.94	2634.46	2803.5	3312.84	2012.27	1349.78	3261.24	2825	NA	2109.3	2558.59	3124.14	2085.71	1967.89	2204.02	3058.66	1439.42	1549.33	1722.72	2752.31
Nol6	4459.55	5094.69	4161.64	4363.98	4835.75	4336.81	4509.27	6147.28	3850.08	3987.89	4323.84	4582.4	4245.71	4490.85	3628.2	3812.97	5492.09	5454.99	5808.62	5764.09	5538.04	7180.71	4991.32	4624.92	5695.16	6009.7	4735.09	4074.13	4666.8	5361.79
Rbm39	19886.8	23050.2	20762.4	19411.5	17723	17984.1	20811.6	19798	19198.2	18649.6	19649.6	21392.5	18997.7	18299.5	10849.1	11431.4	18943.2	20366.1	20459.1	21146.9	18059.6	18213.9	18267.7	18905.1	24725.7	22339.7	24179	23784.1	18513.5	17153.5
Tbc1d9b	2974.5	2620.69	2821.9	2884.3	3401.31	3432.11	3106.63	3143.31	2859.91	3188.12	2951.75	2903.98	2930.4	2974.28	3090.4	3126.44	2891.58	3191.18	3358.97	2673.83	2871.97	3636.52	2238.68	3358.58	2990.36	2290.38	2235.36	2705.27	3025.66	3392.72
Col18a1	26355.9	23228.5	21163.5	21676.5	16665.2	17829.6	20856.2	20495.4	19873.9	20062.3	18838.4	17309	19843.5	17456.6	26857.9	25411.5	31317.6	29767.9	21996.3	29303.1	21197.3	21500.1	20684.1	22485.7	22789.9	22426	20981.1	17671.8	21922	19989.7
Cog4	3987.32	4044.79	4284.21	3876.87	4293.44	4246	4073.34	4757.07	4336.75	4146.35	3730.98	3853.93	3633.75	3650.14	2899.04	2732.16	3238.33	3177.55	3094.47	3250.27	2842.09	2704.03	3877.91	3807.85	2381.45	3601.03	3387.31	3788.08	3477.97	3726.02
Eif5a	111860	131199	148183	154469	136906	146869	125177	148411	97607.4	130768	126538	118914	118742	121651	102957	107583	176045	203676	198011	216697	169949	162712	242320	197187	109443	113312	144690	165314	186314	204524
Cd163	15009.9	13560.1	14114.5	13584.4	18348.5	17562	12112.6	11766.5	15490.8	14553.7	13858.1	14184.8	12831.6	12504.5	9919.29	8893.95	18107.7	22350.4	14771.1	14839.2	23055.1	20743.8	21587	21742.4	11325.6	12927.8	21270.9	21363.8	17771.7	18693.8
Sart1	6777.34	6162.82	6815.29	6511.57	5904.36	5662.77	7062.46	6881.95	6593.79	6834.4	5744.85	6081.79	5959.15	5426.88	4888.29	4108.83	5829.92	6324.32	5195.92	6098.79	5864.22	5644.39	6674.99	6000.38	6752.98	7142.76	6705.02	6587.9	5932.64	5727.24
Eif3g	36745.4	37470.1	36418.1	36888.3	33620.8	36272.2	33122.7	39786.5	35444.7	33579.2	31153.3	29713.3	27887	32624.9	27665.8	31405.5	45768.8	44894.4	48553	48523.2	38421.4	35894	46123.6	44384.2	50601.5	49544.6	45199.8	47499.3	46383.4	43240.6
Ttll12	15377.8	15851.6	18391.1	18434.3	18272.3	16575	16136.3	17864.4	14729.5	16810.8	14557.9	14712.6	16445.6	15492.2	15046	16521.3	18985.2	17394	15409.5	21189.5	20871	21501.1	20804.5	15420.9	17998.6	19598.7	19223.6	16917.4	18653.5	18794.8
Etf1	37019.9	42150	42626.6	42764.4	36212	39412.6	41207.5	41635.6	38538.2	39870.1	37416.1	37789.1	36075.3	40519	24110.1	33383.5	37528.2	42556.1	44892.1	41288.8	42031.9	45265.2	34355.3	38330.7	37507.7	34469	43200.7	47292.4	39034.3	39525.3
Elob	41008.3	41985.9	43427	41008.7	43415.8	38981.2	44026	39467.3	38923.5	41684.5	34425.4	34834.1	40394.1	41753.5	27045.3	29576	32851.5	34980.1	45379.7	40621.8	41053.9	40950.3	41803.3	46621.1	36759.5	35397	36479	33839.1	51577	46796.2
Lyve1	10003.9	9830.73	7598.35	7937.14	11687.2	13214	9193.46	8864.64	11262.4	12773.9	23204.9	23681	11563.5	9959.58	16586.4	22059.3	9232.89	11511.8	10759.1	10290.5	12608.4	14317.5	15039.3	10677.9	8111.71	8714.85	13688.2	15187.6	18944.3	26569.8
Dars1	44984.1	47491.2	46021.6	48416.4	45106.5	45438.8	46833.1	48299.3	44719.4	47827.8	39997.1	44180.2	42842.5	46504.8	40088.6	40968.4	41939.3	43800.1	47746.3	48600.8	49031.6	49491.3	44016	41375.8	47417.1	48696.6	47846.4	50052.3	50553.9	49110
Sec14l4	13435.2	13925.4	13895.3	15145	14446.5	15106.5	18128	22038.3	15936.9	18437.2	19329.1	21310.5	17007.2	17075.5	14799.4	15350.4	11236.9	11805.3	13007.8	12907.3	16096.1	13159.2	10286.7	11491.8	18693.5	20742.8	17238.8	19319.1	14104.3	17945
Smtn	1934.91	2014.37	3702.58	3961.23	3038.59	3026.34	3096.34	2845.9	3311.85	3483.49	3784.01	3527.78	6480.15	7226.83	10720.9	9649.14	13409.1	14890.3	2548.45	3108.25	5928.91	6053.87	3682.05	4735.38	2379.02	2759.54	4831.95	4820.9	4539.85	4194.54
Rnaseh2c	1063.52	1740.67	2237.66	971.979	1973.37	1152.13	1778.83	1607.71	2073.84	1653.17	2640.91	2068.75	1937.77	1995.26	2226.76	4031.55	2198.75	1169.87	NA	1710.32	2578.72	1917.75	2321.64	1836.54	2562.46	1391.78	1542.59	1311.35	1606.98	2456.27
Pc	20624	19955.3	21986.1	21299.6	23043.2	22871.5	21453.4	21442.9	27715.9	26510.6	24715.1	23436.7	25030.4	26690.4	20147.8	17964.4	20274.1	19279.3	16267	16958.9	18979.9	18927	17120.4	17889.8	17906	18402.2	19600.1	17566.3	19845.1	20320.5
Snx27	7560.98	7276.85	7170.73	6768.39	7480.25	6498.82	7167.39	6940.97	7440.1	8692.27	8583.94	7546.47	8290.24	6793.39	6620.35	6615.24	7880.5	8625.45	6889.32	7473.38	8634.52	6702.71	7370.77	7127.25	7440.28	7468.56	8823.29	7856.05	7629.15	7545.55
Eef2k	7296.81	6856.43	6259.48	6474.19	7011.51	6911.92	8207.35	7973.68	8077.53	7741.62	8819.31	8064.08	8140.68	8550.12	6467.08	6542.97	5706	6466.61	5885.34	5954.26	7105.27	6568.36	5580.62	6913.52	8850.86	8695.48	7523.89	7913.09	7226.04	9292.19
Pitpnb	17321	18241.2	15818.4	21174	15053.4	18748.2	15046.1	19350.6	15544.3	17347.3	17209.9	17724.9	18605	20795.9	12399.6	10790.6	16801.6	18534.5	15501.9	15887.2	17968.1	18947.8	17535.9	13862.2	17375.4	15779.9	16072.1	18975.5	12556.3	16281.7
Nutf2	24765.5	19456.6	23062.8	21324.4	27066.4	25779.3	22522.4	20672.3	29204.7	23993	27182.5	22808.4	26033.1	25568.9	30097.7	23890.4	13234	14796.1	32856.4	31825.9	23197.6	24178.1	19791.3	25536.2	19764	18603.5	20133.8	17443.7	30666.2	31715
Pdcd5	13454.1	13730.9	14880.4	11947.4	13006.1	12828.9	12270.5	12007.1	13156.2	12525.2	13206.9	12245.4	11719.8	12703.8	6460.62	5729.65	10942.3	11220.1	9917.85	10550.7	11080.4	11561.9	14006.1	14499.5	10419.6	8122.08	6931.71	5216.06	12096.3	13238.4
Prdx1	447387	488616	538905	501215	526100	487787	492098	437813	477432	453508	430524	503111	474102	469475	566598	537484	549904	498891	622386	662409	531177	556243	478470	516646	517028	572412	543442	491148	637240	556206
Aph1a	4016.7	2703.91	3140.33	4659.02	3910.39	4992.8	3801.23	3087.55	4004.87	3792.79	3095.98	3169.12	3302.14	3569.59	4403.48	3819.04	7432.94	6955.58	5800	9016.66	4185.82	3360.92	6234.68	5449.59	5979.24	7058.27	4911.98	3910.02	3815.64	4072.69
Cux1	3198.73	3970.13	3918.43	3873.9	3180.46	3900.11	3147.16	3363.48	3293.12	3724.66	2980.81	2934.3	2815.3	3011.61	1706.6	2204.73	2013.31	2768.71	3086.58	2264.91	2357.97	2908.53	2741.81	2839.88	2236.56	2268.6	2108.51	2526.38	2699.75	3139.21
Tmem87a	5553.1	4595.1	5465.6	4681	4354.38	4598.37	5143.66	5727.19	4171.59	3940.42	4050.26	2651.94	4303.06	4237.99	5650.8	3659.9	6109.2	4301.44	6167.23	6098.76	4893.23	5849.47	4983.63	4797.88	5576.59	7409.17	7101.71	5857.24	4835.4	4832.6
Cfdp1	6504.03	6763.37	6213.29	7220.65	7927.63	7776.43	7675.21	6858.85	8006.82	8072.38	6968.06	7133.64	7238.25	6812.94	4161.63	4762.71	9089.97	10568.6	9540.05	9572.2	7353.84	7028.65	8731.36	11185.8	11970.4	11289.1	7255.42	7663.11	9709.93	12089.1
Slc25a20	12417.8	13182.5	13989.1	15057.9	14137.6	14870.1	14958.5	13649.6	16100.1	15769.2	13313.9	14348.9	13844.6	13481.2	16083.6	13966.8	14476.6	12229.2	12090.7	12020.1	15792.6	15437.3	10474.6	12242.7	12469.6	12309.2	12602.2	11758.7	11791.1	12309.2
Psma1	106844	118856	95987.1	88934	99677.6	96032.1	94668.4	102531	99982.2	106320	123906	122422	112886	110224	96980.7	89944.8	80786.1	106795	148905	135430	108762	119811	90682.8	101897	109002	112947	100281	101868	107215	117939
Nmt1	17520.7	17009.5	18382.6	19929.7	13929.5	17929.7	16066	19013.5	16791.7	16519.3	15463.6	16711.7	14291.4	17137.2	14661	15509.1	15330.1	21065.6	17414.1	18797.4	16225.4	16460.3	14688.6	18363.7	18125	20283.5	16116.2	17056.7	16441.9	15380
Ifih1	921.96	800.088	590.556	816.624	859.69	890.135	670.965	760.555	857.419	1149.83	832.801	662.947	1203.5	1125.73	742.204	940.688	935.086	1199.89	842.008	1362.27	744.396	401.027	799.652	800.931	1273.1	1146.99	1621.26	1056.13	1116.73	1286.62
Myh10;Myh9	83481.3	73749.1	92880.4	78554.4	85449	76995	84959	67555.9	83001.5	70804.2	75436.9	57714.6	68971.9	60180.8	73520.6	69505.4	78791.8	76532.3	81868.5	97093.2	94087.4	77767.8	100570	92906.8	80099.1	78974.1	96266.4	83275.1	80632.6	82928.5
Gsr	15836.7	13329.8	12684.7	13017.1	13144.3	15404.8	12233.9	12687.2	13525.2	16047.3	11882.2	13157.8	15657.7	13413.1	11637.4	10669.8	12171.8	12809.1	13167.1	14355.5	16790	15786.8	11329.2	11258.5	9255.69	8553.6	12406.5	11539.3	12463.9	12297.9
Eif4h	60041	62188.3	64283.8	74090.4	64314.9	62421.1	58250.9	62739.8	66453.4	63061.3	49902.8	48788	54363.2	59958.7	40557.7	42526.2	66075.3	66476.5	63196.1	64532.9	55142.9	58831.8	68092.3	68487.6	66203.5	64952.9	70556.6	59679.5	69417.9	69517.5
Arhgef37	3496.02	2725.81	3395.33	3601.41	3047.46	3101.34	3695.72	3716.94	3367.34	3517.85	3314.99	3391.1	3055.63	3475.75	2502.45	2604.25	3316.11	3113.33	2313.03	3278.48	2456.37	2819.96	2372.17	2909.99	2810.38	3409.91	2844.39	2482.6	3932.05	3641.34
Wfikkn2	1699.92	1677.03	NA	1734.08	1348.15	2064.35	2186.81	2384.21	2162.99	2468.88	1211.17	1970.4	1586.25	2516.16	NA	3902.11	2170.69	2557.86	1780.7	1099.84	1486.56	1630.81	NA	1602.77	2426.91	3602.55	1151.5	1157.39	2069.86	2390.57
Mmrn2	1549.09	1539.16	1435.9	1603.06	1227.35	1396.57	1502.58	1720.79	1301.73	1668.2	1218.18	1800.95	1611.23	1692.89	1380.59	971.939	1610.33	1682.07	NA	1127.84	1370.79	1481.86	1235.87	1622.14	1112.2	1276.43	1075.69	1512.98	2098.11	1583.57
Dad1	11816.5	11804.6	15179.3	17552.5	14352.2	14717.6	11442.3	11006.8	16384	15883.9	11118.8	14052.7	14200.2	12653.7	12156.3	11945	16153.7	16156.2	28802.9	25087.2	12732.5	11049.5	21320.1	24095.6	16474.4	17347	14090.8	14457.3	22056.5	20618.2
Abhd17a	1021.69	958.049	1401.55	1320.08	NA	1141.04	1359.25	2116.32	1182.1	1269.38	1513.83	873.559	800.646	1383.82	1622.05	1438.79	1001.97	1932.68	1548.58	1626.3	1077.58	1459.6	816.091	904.361	NA	1418.6	1769.7	1332	NA	1301.63
Fam76b	3116.39	3595.05	3779.37	3993.82	4286.13	2847.09	3512.7	4087.7	3361.25	3749.93	3895.39	3843.5	3284.33	3593.66	2888.68	1610.5	5525.51	3747.62	2468.57	2375.23	3824.95	3117.71	3560.86	4387.02	3031.79	3665.06	4292.89	2696.75	4184.36	1874.87
Fam76a	1054.28	1073.86	1254.59	1131.64	1484.03	1004.07	1037.96	1542.35	1435.66	883.791	1118.77	843.652	150.959	950.743	800.768	709.335	2696.53	1736.02	469.406	1303.18	1701.04	1200.92	1247.87	1051.01	2021.7	1226.1	1785.88	1735.17	1278.37	1448.77
Serpinb6	115937	111788	119784	121707	139222	138040	114268	99335.9	124584	113114	112029	113348	127038	131201	112495	103200	155878	150067	131892	122192	140421	150635	129232	127299	105098	108363	130478	121588	128140	118998
Serpinb8	27262	24995.2	22282.7	21772.6	18497.8	20318.2	23305.2	24051.6	23698.7	23629.2	31504.4	28199.9	31023.1	24739.2	34174.2	31643.4	18738.3	21619	31523.6	28521.5	29844.6	28039.1	21773.6	22048.2	28074.7	25418.1	23991.5	27308.4	25017.5	29037.4
Pgghg	1891.57	1946.82	2239.36	1792.57	2681.95	2485.33	1515.38	2081.34	3299.89	2687.99	2756.18	2318.51	2518.83	3493.79	1003.28	930.66	1567.66	1837.56	1210.9	1770.15	1595.26	1637.57	1950.08	1838.92	1266.74	1434.28	2259.57	1952.4	1299.79	1909.59
Fkbp8	7517.33	8148.37	5775.96	7721.52	5089.78	6121.92	6943.99	8290.31	7895.54	7851.16	5727.82	6410.85	5609.86	7550.04	6704.58	5706.75	6251.83	7471.19	6520.41	6912.02	5709.37	6519.52	9157.05	7768.07	6470.05	6965.31	7442.93	8046.55	4642.99	7819.72
Myo1d	6882.45	7050.75	6000.91	6916.47	6058.06	6681.65	5779.12	5694.76	5659.04	6558.25	6083.88	6630.2	6985.76	7526.86	7484.48	7673.09	7322.87	8552.96	7463.21	7441.77	7276.48	8143.84	6168.62	5880.21	7334.68	8530.71	7433.26	6786.61	6011.75	6550.04
Ccdc97	1313.74	1118.85	1216.76	914.3	1500.82	1310.65	1066.72	1155.76	1578.68	1154.21	1065.48	922.386	995.216	1124.97	656.344	550.263	1337.81	2032.47	NA	1282.56	1273.13	508.544	1072.17	2278.58	1386.12	1415.64	1220.73	1188.3	1623.55	2389.07
Icam1	2245.54	2906.77	2522.39	2823.63	2294.68	2206.35	2321.77	2468.78	2640.88	2419.87	2748.27	2945.9	2514.26	2879.08	2031.78	1786.73	2232.64	3466.51	3801.22	3893.88	3016.19	3880.6	3819.21	3649.51	2703.78	2656.06	3033.82	3087.85	3166.15	3197.77
Tjp1	12209.4	9677.29	11975.9	11328	10957	10506.3	12454.1	12692.8	12467.2	12641.1	11171.2	11074.8	11845.2	11672.7	8000.71	7781.87	11635.9	12618.9	9959.77	11101.4	11573	10581.1	11850.8	10017.5	12646.5	11554.5	13149.8	12960.1	12224.9	12279.9
Ppp1cb	55843.7	58758.5	46848.4	54959.7	45209.5	53055.4	44188.3	51760.3	58128.6	51875.8	59346	56308.6	59276.4	62651.3	43071.8	46251.9	62762.6	64245.2	56377	61750.9	65320.4	67622.1	64153.5	62506.4	67617.3	63329.5	62507.3	69671.7	55450.3	68188.4
Tanc1	2305.84	2175.41	2392.75	2425.58	1995.96	2241.07	2223.1	2999.94	2222.49	2479.55	2660.94	2938.61	2547.33	2527.58	2939.96	2159.82	1907.39	2125.12	2199.46	1873.27	2434.75	1763.67	2272.03	2160.3	3027.78	2507.03	2721.65	2414.61	2325.31	2680.72
Mfap4	62365.6	46658.3	38184.2	44111.8	40641.2	42339.9	49937	52442.1	42048.3	48174.1	42370.3	38967.2	52950.9	50812.3	65362.2	70676.4	51713.1	52703	38422	52504.3	59996.7	60885.9	87007.7	30687.7	19633.3	12110.6	21780.1	23845.1	60462.6	59657
Tent4b	1079.19	1089.13	1228.4	1537.3	985.213	702.776	920.392	1300.15	1011.31	945.398	1436.85	1507.68	1231.52	976.305	750.514	860.265	1374.81	1538.28	1937.83	1658.09	1442.12	1208.48	1542.13	1221.31	1711.05	1821.39	1540.66	1215.38	1678.96	1501.22
Ranbp2	10102.8	10186.5	10343.5	10722.4	8765.93	9546.51	10496.4	10703.5	10088.7	9817.63	9927.8	10203.5	8952.11	9921.69	9996.98	9081.02	10170.9	10337.4	9580.68	9576.79	9907.13	10048.6	9613.82	9925.62	11143.6	10723.3	11201.9	11263.6	9939.66	9988.72
Phldb1	4049.32	3556.18	3983.25	3797.84	4213	4581.98	3482.6	4024.23	4589.69	4605.97	4173.38	3918.51	4523.09	4118.53	1851.4	1772.39	2626.94	2440.12	1515.85	2013.94	2332.29	1939.96	3758.26	3477.98	2874.5	2210.72	2842.39	2707.14	2892.52	3268.96
Cog7	5975.54	5341.53	5207.71	5651.32	4582.85	5050.4	4736.94	4915.46	4509.26	4634.13	4943.13	4363.16	5118.26	5260.26	4669.21	4908.38	3789.34	4329.09	3268.88	4151.33	4590.81	3805.79	3898.22	3478.79	4783.66	4128.69	3515.69	4069.09	4172.1	3802.54
Def6	2533.29	1964.8	2534.05	2120.06	1680.25	2608.99	1743.08	2459.45	1960.52	2091.46	2279.66	1461.75	2553.8	2213.05	1358.56	1345.37	2481.39	2343.57	2572.67	2108.04	2381.32	2555.89	2914.72	2034.13	2432.91	2350.71	2317.47	2513.44	2104.09	1794.68
Mrpl24	4711.74	3636.06	3434.2	4153.81	3388.67	4208.49	4068.53	5239.13	3126.94	3625.9	3815.39	3107.19	3647.73	4035.3	3496.86	5658.28	4330.97	4155.12	3026.68	4393.8	4043.34	5925.05	3650.2	3882.08	3889.14	3193.74	3024.37	5345.03	3951.61	4123.34
Ca1	4838.27	3637	5084.4	3747.78	11989.2	12127.4	3188.78	4103.83	4642.51	5082.18	10555.9	8934.33	7738.09	6772.11	8465.89	8081.95	4534.58	4618.91	3526.37	3785.11	7699.4	7365.23	14048.5	13474.5	13807.1	14027.8	19174.6	18381.1	21394.3	19674.3
Ankle2	2264.14	2317.05	2399.79	1960.39	2378.75	2583.84	2591.01	2041.17	2123.5	1969.91	1631.72	2177.96	1733.43	2121.44	1520.24	1388.88	2668.59	2597.79	1447.84	1141.96	2766.42	1309.8	2235.58	2431.13	2868.01	2539.64	2185.22	2231.7	1756.78	2390.49
Bcorl1	NA	NA	NA	NA	NA	2481.96	NA	2578.86	NA	2398.67	NA	2488.82	NA	NA	NA	3861.02	NA	1977.39	NA	10864.3	NA	2514.98	NA	NA	NA	NA	NA	1353.06	NA	4955.39
Triobp	4897.08	4390.68	3979.1	4641.81	4198.07	4431.87	4286.57	4617.14	4464.9	4484.6	4335.77	4286.23	5185.58	4268.81	3938.1	2920.86	3859.57	4447.11	2691.63	3875.03	5008.92	3641.81	4136.82	3948.65	4336.25	4348.92	4565.84	5485.04	3389.41	4176.79
Raver1	4121.28	3218.91	3614.36	3492.54	3391.87	4385.09	3381.49	2528.6	4055.83	3938.36	3214.78	3583.47	3060.7	3372.16	5630.61	5225.58	2411.43	2895.35	2940.14	2192.03	2507.62	1841.24	3037.81	2685.1	2804.75	2076.22	2732.53	2036.6	2806.46	2828.19
Hspb8	14217	12997.3	12429.5	13292.7	14235.2	15023.6	7705.29	9122.88	11972.8	12099.1	8750.73	10081.8	9009.91	10494.2	10352.6	12268.2	9948.41	10867.3	7351.51	6552.01	9251.79	8524.89	9599.9	12824.4	5411.05	8371.57	3785.19	4800.42	10613.7	11198.1
Ptk7	18941	16372.7	17693.5	19182.3	16326.2	18060.4	17446.7	18321.3	17829.6	17986.7	15382.5	16690.5	17364	18928.3	17226.5	17107.2	17268.8	22140	18378.5	19582.3	17428.2	17698.7	16098.9	16315.1	22365.6	21777.5	16976.8	17357.7	16611.6	16296.5
Dld	40935.7	48578	46335.4	45064.6	38813.8	42553.7	45077.8	42935	49433.7	47074.1	45060.6	56907.4	38267.2	47313.3	55837.6	49176.3	64076.1	57217	67535.4	59892.3	66585.2	61857.9	47900.1	46865.2	58240.7	58079.2	63068.5	53835.8	62868.3	60782.7
Mblac1	NA	347.782	NA	509.441	752.935	942.225	597.226	332.124	666.963	788.227	NA	774.339	445.679	652.461	NA	518.757	882.831	787.567	NA	661.651	NA	1012.54	809.486	NA	NA	NA	471.13	560.153	NA	599.992
Tmed1	2430.95	1631.64	2631.28	2125.23	2356.07	2694.24	1835.43	2010.49	2410.9	2518.55	3510.07	1771.45	3274.17	2668.89	1977.55	1780.96	2518.18	2969.09	2452.27	1253.55	1949.04	2203.56	2574.63	2382.78	2664.72	3379.54	2232.75	2126.44	2235.06	1889.7
Pdzk1ip1	17337.3	14632.4	18084	19104.8	14904.2	12909.7	14477.2	17325	15107.1	15921.7	6933.68	15330.2	11371.7	12712.6	22220.8	24299.1	12648.8	13291.2	17103.7	17593.3	14574.9	14390.4	17792.8	15826.4	17172.8	16807.3	11973.3	12077.3	23546.8	24460.2
Syncrip	81100.9	77579.4	75823	82401.4	75919	82020	75972.9	86116.8	77210.3	77128	73715.2	65841.4	76142.7	72148.4	47392.2	46949.8	82731	91675.6	84543.7	86521.7	88301.6	79551.8	82091.5	72984.3	81251.6	77285.6	72128.4	82357.3	70600	75497.4
Rps8	335250	347741	301542	377984	266696	292600	310149	317713	257969	314494	280860	300035	261593	300883	250960	270520	295697	289972	363824	366497	373165	430880	295751	288973	303584	296494	407667	403729	311539	319311
Psmc6	46007.8	47648.3	46948.3	49518.8	42759.1	46252.6	46366.1	46463.3	43576.9	47145.7	46399.3	45657.6	43433.2	43207.6	35222.2	42580.6	41429.2	44130.1	44338.2	47541.6	59518.9	52291	44539.1	37342.7	43937.5	43102.7	39758.9	41735	44251.4	46201.1
Hsp90ab1	431082	452029	450967	513423	419857	436499	469429	462611	409902	386752	365127	403111	411829	403441	347520	366468	553091	549152	597965	664521	525303	526331	598826	537788	522703	539296	563186	545484	540478	508118
Rpsa	177205	199524	203428	187527	183812	175002	171694	177226	176467	173286	158374	154850	152114	151598	167016	150205	152437	156539	234913	215580	169599	187451	176873	173343	155548	154185	141029	141817	194369	184028
Farp2	2321.45	2995.46	2295.06	2328.94	2431.77	2369.77	2541.82	2655.71	2266	1884.09	2084.96	2050.7	2279.57	2914.49	2031.96	2206.43	1791.29	2264.45	2202.56	3209.79	1977.83	2291.78	2486.08	1985.01	2103.43	2451.68	2303.18	2247.78	1890.33	3206.46
Brox	11696.8	11864.6	12573.1	11690.5	15796.6	15928.6	13017.6	10176.3	13795.1	10733.1	9673.71	11893.7	10487.6	12225.2	10058.2	9591.01	10878	7991.28	8828.46	8868.58	10599.6	9044.76	11712.6	10112.7	8191.67	7683.68	10394.6	9059.66	13297.7	12525.4
Coch	263547	293954	110919	127800	57037.8	60672.7	86695.9	86843.8	101573	110725	49420.1	48920.7	107103	115647	170430	168201	374198	378236	378717	384664	151419	168273	197819	209734	281670	305417	97954.3	102309	227106	236900
Map6	9603.49	9833.85	9501.15	10620.8	8487.15	8839.28	7700.6	8933.17	8544.07	8703.89	9483.15	6666.9	7541.8	8348.5	7425.01	5825.03	9633.91	8565.59	9332.79	7495.84	5936.79	5442.39	7586.65	8666.71	7767.85	9492.46	7005.2	7792.06	9752.48	8803.42
Ppp1cc	11234.1	12181.6	9437.54	12686.4	10151.3	10673.4	13427.3	12377.3	11915.2	12273.8	11821.1	10130.7	14446.8	14154.9	5390.62	5702.34	11757.1	11011.2	11652.5	10012	10887.8	10645.8	16176.5	12428.3	11511.5	11352.5	12016.1	11500.8	10095.6	7408.26
Otud4	4885.92	5348.31	4220.44	3811.02	4104.99	4244.92	4323.15	4520.5	4320.55	4967.24	3387.12	4104.76	3771.64	3387.37	2722.44	2850.64	4946.51	5260.97	3889.83	3336.21	4829.1	4132.65	4561.99	4751.36	4135.96	3581.75	4048.92	4112.03	3714.21	3910.55
Snx7	2855.01	3127.22	3896.54	3402.88	4742.62	4544.14	3333.27	3345.04	3157.19	3380.44	2552.54	2773.3	3873.31	3333.03	1767.62	1457.21	3134.21	4010.42	2134.93	1879.34	3088.28	2845.52	3839.37	4037.97	2637.33	2419.67	2761.06	2261.43	2313.88	2402.38
Rps18	297457	304637	331135	282453	279365	263611	319270	279703	271458	258873	340363	325791	227492	245807	509119	466144	252448	230326	309284	310921	332503	322837	227900	231531	292513	277282	313963	263963	347382	279498
Tnc	8549.15	8769.51	6008.41	6571.84	4589.96	5474.93	6136.72	6626.18	7806.48	8136.81	4552.47	5328.73	6880.03	6904.63	6121.1	5351.61	17050.8	18702.1	17707.9	18871.5	19567.5	22209.6	8702.97	8216.45	13325.1	12704.7	5465.96	7170.79	6561.89	7034.31
Tm9sf2	20102.8	23584.6	22937.5	24323.9	19759.6	21427.6	23271	18794.8	22393.8	22049.3	14512.9	17407.5	19740.3	20629.3	15009.2	16615.7	21801.6	21940.5	27464.6	21018.5	22735.8	20675.6	19507.8	21401.1	20836.9	18243.9	23417.8	23373.7	20462.6	23375.7
Eif2s1	62411.5	62264.1	61318.6	62045.7	53847.3	56817.3	62474	60759	57285.1	56491.5	58101.1	53206	57740.4	53231.1	48046.2	49371.7	57828.4	60744.3	65452	68482.9	71863.3	70614.8	60575.9	58180.5	57037.6	55928.7	69563.1	67596.6	56960.8	62523.7
Abce1	37113.6	35704.1	36242.9	36113.3	33369.5	33090.7	37266.8	34214.7	33601.6	34670.6	32447.9	32815.2	37425.7	32685.9	26751.5	27431.7	35458.9	38060.9	33747.7	34768.8	38507.9	39110.4	35716.5	33875.6	40084.6	34324.6	37578.9	42553.2	31303.4	36375.1
Glg1	15080.7	13503.4	13050.1	14013.9	13296.9	14799.8	12906.8	13413.4	13557.5	14161.1	10671.8	11794.1	12846.5	12385.6	9155.86	8483.1	9918.66	10880	8101.76	8843.58	11055.2	10950.8	11070.7	10169.6	10093.9	9072.11	10084.2	10515.4	9334.88	10451.1
Atp1a2	3149.74	2661.15	3966.99	4232.34	3736.46	4019.34	3683.65	3835.93	9388	9626.48	7778.36	7621.51	10228.6	10272.4	5300.86	6282.66	11765.8	13044.6	5273.81	5546.89	49457.9	46781.7	3655.31	3146	4540.12	4461.03	3357.31	4050.62	2760.61	2535.14
Atp1a3	1070.18	475.024	NA	NA	NA	704.883	858.881	483.065	848.498	576.188	338.069	394.677	1066.96	452.8	NA	NA	NA	NA	NA	NA	NA	NA	NA	NA	NA	NA	NA	562.784	NA	NA
Atp1a1	230589	257791	217917	217907	212084	202976	167271	160138	209916	211983	188469	183229	237297	273352	143023	129409	243345	254162	235480	243691	140668	146607	246523	252003	203494	195834	196043	184580	200311	187032
Tyro3	1052.29	855.005	1085.42	1014.7	837.998	1318.04	1278.6	830.213	997.787	1029.84	1009.43	1465.26	1268.03	943.24	858.906	1560.87	857.821	815.228	1265.44	1203	1054.28	938.388	928.731	746.842	920.996	854.026	1190.14	1001.16	1201.01	1066.62
Aspa	3559.89	2704.71	2148.97	2552.5	3787.98	3395.27	2284.79	2668.42	2611.78	2890.6	2909.18	2499.38	4351.8	4229.5	2105.93	1431.03	3964.75	3235.63	2650.13	2261.1	2791.77	2992.13	3878.08	4120.78	3242.82	3025.55	2875.09	2998.36	3253.94	3192.54
Paip1	8776.32	8465.8	9127.95	7703.83	10488.2	9395.85	8253.05	8887.72	9860.92	9720.41	6949.21	8863.89	8842.55	9455.89	8768.29	7277.73	5937.14	5904.41	4668.59	6058.01	8331.86	6592.12	6166.58	7218.61	7024.11	6339	4810.6	5050.41	8593.25	8025.42
Vit	4851.6	5278.81	5089.9	4929.75	4008.15	4342.53	3696.96	3911.14	4488.68	5170.14	3021.41	3476.57	3470.89	4086.25	2549.1	1807.54	4724.97	5774.79	4045.76	4034.64	2371.82	2226.87	2347.79	2747.16	2456.18	2797.67	2767.63	2936.37	2401.36	2158.02
Col6a6	4143.5	4153.18	4249.44	4023.98	4166.04	4113.73	4331.02	4462.86	5221.08	5390.97	4656.59	4512.59	4948.03	3501.38	1467.31	1010.86	2104.3	2312.87	1676.51	1470.27	1818.41	1354.98	3010.37	3116.89	1341.19	1537.61	1790.6	2015.48	1929.44	2306.14
Cd84	NA	NA	288.322	NA	NA	425.271	NA	NA	NA	NA	NA	NA	NA	200.45	NA	NA	352.362	NA	NA	NA	NA	NA	694.514	515.737	NA	NA	NA	NA	NA	NA
Nt5e	7428.45	6436.1	7720.36	8453.42	8124.13	8892.56	7024.12	6754.89	10260.6	10529.7	8421.33	8080.53	8828.01	8725.33	7781.75	7379	8075.28	7507.45	6064.54	6619.3	6004.8	6245.15	5424.6	6576.9	5272.27	5426.3	6631.21	5982.24	5784.56	6838.12
Hars2	2559.62	2954.31	3150.18	3386.27	2664.36	2938.26	3014.41	3316.49	2496.61	3482.43	2746.25	2980.29	3039.09	3750.2	3269.72	2412.96	2914.12	3264.91	2886.47	2583.46	3942.93	3019.53	2985.6	3166.57	3160.78	2934.59	2332.02	3041.66	2941.08	2256.84
Acsl5	21679	20479.3	23336.8	24491.3	19281.8	22674	26108.5	29314.2	25235.7	27093.3	25010	25366.3	23499.2	20308.3	14410	15490	17782.6	19976.3	18680.6	20134.6	21607.8	19565.4	15117.7	13823.5	20009.5	19983.3	22612	22261.3	20008.8	21514.1
Mrps23	2261.16	3197.44	3021.79	3324.93	2162.51	2400.65	3252.98	3028.36	3697.47	3588.54	3009.01	2664.44	3142.05	3249.72	5387.65	5398.17	1887.39	2133.42	3547.89	2979.2	1998.17	1901.88	3934.92	2635.82	3097.69	2487.24	2133.4	1744.56	3318.38	3299.18
Rps11	208272	237203	273134	254171	250043	221478	283737	221151	242411	223872	233450	219180	190928	202799	350597	242163	264465	237643	279519	279359	258765	273506	209795	233078	235447	252527	317393	284380	252574	235390
Gstm1	94603.8	82045.4	127384	120930	142334	132774	115126	94835.6	157077	138762	117596	93522.6	155694	141522	120613	88974.4	205148	171779	141102	133512	143086	135344	204527	166958	124347	128774	130313	124885	194100	168073
Col12a1	32636.7	36983.7	35443.3	33762.3	26670	27353.8	37588.1	38151.6	45321.2	44419.6	30476.5	32673	33329.2	33458.8	36274.3	34586.7	52115.6	54128.3	44674.6	43917.9	39282.4	40934.8	20731	22955.8	34336.8	35101.6	25160	25627.3	25421.3	25854.8
Rab28	NA	202.96	527.27	548.526	452.594	430.452	913.461	346.248	661.365	568.824	NA	233.645	351.462	675.671	434.743	889.03	NA	646.53	NA	588.809	NA	446.77	763.253	493.892	NA	NA	487.458	236.348	455.457	566.276
Osbpl1a	23199.3	20582.7	21194.7	23144.5	22361.9	23382.6	24793.4	25933.1	22992	23582.1	27938.7	26532.5	22022.2	24148.4	24026.6	29089.7	21644.3	20458.6	16149.2	18868.9	24295.9	24262	22231.3	18332.6	22907	25600.2	25216.2	26386.9	27654.2	28509.8
Stk24;Stk25;Stk26	27584.4	30731.8	25448	30378.5	20731.8	28091.2	21808.7	27547.9	24808.4	27165.4	28509.9	27478.9	23110.2	27555.1	26922.8	38258.1	21499.6	27299.3	17607.5	25028.6	25576.2	27322.2	12095.6	14675.8	21833.3	20856	22506.2	29422.8	24840.3	27288.9
Npm1	108037	110575	118032	114246	102416	108286	109291	118034	97812.4	124071	132600	111862	106154	119348	129909	122345	157369	136787	163983	181065	139207	138919	147469	160504	134570	117875	164111	154766	174722	150709
Rbbp4	23451.3	23553	33202.4	29489.6	28504.4	23565.2	34197.8	17869.9	27428.7	26891.4	26126.3	21319.5	20025.5	18364.5	30845.6	26891.2	40633.2	36785.4	27845.7	33743.6	25495.4	25579.1	35610.7	38616.9	27568.3	29889	36291	33678.3	46649.1	41069.3
Ube2l3	43161.5	39857.5	37230.9	40729.1	50707.3	50080.6	31566.1	36428.9	45716.7	44053.7	25555.2	24464.3	34387.7	43325.3	13158.3	12130.7	21309.4	25384.1	27195.6	31714.2	22007.1	20776.9	22250.7	21547	19053.6	18764.3	18865.5	18005.7	29273.5	31299.7
Ranbp3	10692.8	10754.3	11993.7	11604.2	12073	11804.1	12354.1	12613.1	13925.8	12171.7	9652.75	10061.6	10407.9	10922.4	7909.32	7100.37	11071.3	11622.7	9413.07	8328.56	10259.9	9607.26	9972.73	9841.79	10576.8	9924.8	12507	11484.1	8861.43	11065.5
Tfip11	2493.74	2066.07	2538.11	2325.49	2259.3	2571.15	2190.63	2308.62	2494.77	2296.92	2314.73	2153.78	2112.81	2026.31	2894.97	2386.42	2485.37	2219.15	1996.02	1955.41	2274.18	2611.39	2276.37	2290.06	2936.8	2625.49	2287.7	2173.22	1981.83	2364.51
Pus3	679.568	568.909	112.813	NA	402.503	697.592	406.372	273.333	236.614	NA	709.085	958.63	484.278	633.078	1110.35	911.584	NA	NA	NA	NA	NA	NA	548.654	NA	180.369	873.209	NA	NA	691.737	938.334
Itpr2	3024.77	2954.63	2629.57	2518.44	2798.82	2808.58	2663.28	2314.52	3054.88	2736.97	2580.43	2504.04	3545.67	3608.11	1866.44	2171.86	2860.5	2909.05	2856.24	2394.57	2809.68	2839.68	3351.87	3191.8	2982.6	2572.49	2779.28	3290.03	2792.03	2918.97
Champ1	1549.36	1561.42	1427.92	1191.77	1505.35	1338.42	1799.27	1607.48	1623.51	1364.89	1015.16	1021.6	1417.49	1748.44	1319.55	1097.01	1412.06	1976.24	NA	1482.06	1079.3	1186.33	1420.42	1873.29	1580.18	1445.27	1514.36	710.735	1770.45	1553.76
Gsdmc	26193.3	27718	27109.8	31535	25728.4	26749.8	23904.2	26426.8	23328.3	28073.6	28372.9	31230.9	19080.2	20098.5	21984.3	22697.3	14887.3	17192	32922.7	31563.6	37348.7	41409.1	94940.6	103020	37674.2	33747.6	44307	50530.9	54573.1	52680.9
Rab14	42657.2	48975.4	45651.1	50152.9	43906.1	47315.5	51199	49534.8	41686.9	47611.9	46888.3	53379	44166.9	45565.1	34089.4	43281	46958.7	51631.3	54082.8	55227.4	46546.3	52585.2	44813.1	48397.5	52939.6	49330.5	59867.2	56063.8	55348.8	53187.9
Krt32;Krt35;Krt36	NA	5588.28	12865.3	9366.18	7848.02	4233.51	11619.2	11080.2	12825.6	11832.5	NA	4187.4	NA	6398.84	4967.38	4820.11	14789.5	10562.3	13231.8	10415	NA	8176.66	NA	6760.04	NA	NA	7272.19	5380.4	8685.1	6876.66
Capza2	45146.5	40956.3	42461.9	54944.5	42422	51667.6	34239.8	48168.8	36157.1	49369.1	37910.5	44488.5	42235.8	50678.7	37111.8	44044.7	78968.1	69075.1	69784.8	64316.6	56111.6	63531.9	73420.3	71623.2	67633.1	62871.6	52288.3	73193.4	62311.3	68704.7
Ttc22	2134.03	1803.39	2195.51	1907.42	1759.01	1790.8	2740.62	2414.57	2281.7	1950.28	2099.14	1793.72	2139.49	1929.28	1694.68	1490.94	2114.04	1785.13	2228.2	1374.71	2111.75	2478.6	1869.95	1240.57	2259.32	2121.26	2755.58	1948.59	2590.57	1900.38
Xdh	29930.5	30116.6	30916.7	33665.4	33406.8	32289.4	29255	31532.6	34031.1	33722.7	32116.1	33828.5	33517.2	34487.2	27656.2	25726.4	35792.6	31914.1	43874.9	42810.3	39467.7	42102.2	34176.5	37553.1	28671.9	26904.1	37510.1	35440.9	33617.6	32256.4
Krt17	102677	105167	128452	127618	95258.6	90308.4	122941	113943	107261	105173	70513.6	72065.5	76104.8	78632	102898	85758.9	292928	305280	395340	398516	282422	327371	141627	151062	188550	204027	163771	151449	133986	119175
Krt16	144179	154591	149292	146608	86096.3	84494.1	45556.7	44862.6	47661.2	42134.8	50354.6	44517.6	41193.1	43176.1	54304.3	52986.4	473201	437151	1365730	1424350	993745	964837	116943	106905	105678	94592.4	181163	175522	141638	128862
Krt14;Krt42	423168	480642	683558	634609	323409	389486	524516	401459	426620	380153	330309	303397	377113	326530	380123	328535	766982	937682	1572650	1583050	739409	924180	600237	727484	615342	590287	824151	601847	521870	510238
Krt14	1204840	1257270	1348800	1367960	997686	988227	1054290	930183	902412	837089	896932	937738	816481	827886	1214530	1117540	2019080	2029390	3104860	2662660	1514700	1678860	1537600	1532650	1391080	1261800	1642590	1521700	1644780	1427570
Krt42	3558.18	3778.81	7591.95	9289.08	3113.32	3368.79	2661.31	3062.34	4623.34	6143.16	1516.7	1484.31	2553.15	1975.46	9122.85	8114.73	10180	10337.3	15774.3	11425.3	7111.33	7268.08	3837.37	3383.87	5653.55	4684.66	12621.9	12543	10541.7	10572.4
Gtpbp4	9431.33	10353.9	9826.53	9422.65	7746	7928.27	9586.3	9375.04	7986.28	7294.9	8729.78	9279.81	8408.49	8729.22	12363.9	10186.7	8062.24	8849.71	8047.22	8323.63	10562.4	10306.8	7036.03	7129.34	11112	9276.47	8948	10020.1	7713.88	6611.36
Utp20	2132.99	2296	2439.86	2756.99	2113.09	2425.59	2705.46	2743.07	2189.06	2393.25	2247.95	2368.37	2001.81	2108.53	2210.08	2217.26	2532.92	2779.75	2459.16	2511.65	2143.29	2635.51	1577.2	2264.84	2840.93	2410.57	2280.63	2236.33	1866.92	2103
Sort1	7117.63	8101.41	5530.98	5465.92	6312.63	4700.89	7128.96	6428.45	5993.69	5939.94	6350.38	5725.05	6875.08	6758.87	7852.61	7451.53	5422.16	6578.35	4193.07	6160.28	6730.04	5875.78	5850.8	6072.31	8160.78	6712.95	7723.55	8418.07	7432.27	9110.9
Pop4	1678.53	1724.51	2443.44	2326.57	1727.54	2014.33	2166.45	2328.15	2478.3	1777.73	1683.85	2119.09	2008.96	1720.93	3028.37	1871.16	1527.41	1450.34	612.405	2588.13	2605.94	1975.32	1149.83	1252.76	915.147	1600.24	2560.73	2292.78	1614.88	2544.09
Cycs	56716.1	48533.1	48282.9	47670.2	53644.1	51506.9	40150.3	39216.6	45972.6	40931	40752.6	36506.5	52428	44417.8	31050.1	24208	25599.4	28924.9	40709.2	42983.8	54373.3	44890.8	36093.7	39167.8	24750.4	18292.9	23879.7	23202	44511.8	44186.5
Msr1	NA	3996.44	3443.73	1895.65	2106.97	2317.05	1437.6	2245.31	2565.29	1922.86	NA	2957.43	NA	1166.32	2340.26	1690.74	3760.93	3905.49	5112.79	7095.3	NA	2481.5	4380.51	3026.69	NA	4726.48	2084.49	4292.44	4884.88	6079.01
Srl	NA	NA	3265.41	2555.93	NA	NA	2596.83	1769.67	24144.1	21465.4	27720.2	29865.8	22149.6	25312.7	24711.1	24963.4	27114.1	27072.2	15828.3	13621.9	154006	153149	NA	NA	9601.99	7298.76	NA	2380.46	2241.5	5651.78
Hsp90aa1;Hsp90ab1	317046	341716	327359	331020	299949	351168	271814	287402	321948	312562	348601	346386	268747	323545	304063	348169	432528	454314	442019	440583	352003	371434	405078	424424	426904	445556	410308	419993	444649	487951
Ascc3	3656.81	3918.49	4417.11	4068.95	3481.11	3847.63	4224.37	4569.34	3628.81	3795.74	4063.99	3875.88	3730.26	3901.71	4744.56	3931.27	3473.21	4334.6	4277.14	3444.53	4443.88	4600.54	3247.75	3398.46	4522.4	4004.38	4495.8	4807.56	4528.38	4448.65
Mlycd	1731.25	756.242	1089.6	1194.63	763.443	936.391	1211.91	1105.83	1336	1241.09	1530.37	1510.95	1203.1	1451.34	1397.62	1399.54	320.328	1343.21	614.451	1051.47	1237.11	1134.46	1702.74	1017.4	1088.71	935.497	1330.1	867.233	1239.92	1125.1
Gdpd3	5386.27	4547.92	6043.39	5833.78	4708.87	5062.35	6977.93	7172.94	7910.63	6854.62	7717.03	6196.61	10045.1	8707.83	2603.8	2480.96	5572.96	5073.97	9729.17	9137.84	8047.34	6389.27	7516.5	6489.28	5799.78	5480.07	7606.04	6909.75	5089.97	5406.42
Optn	756.009	634.7	NA	213.568	NA	994.627	NA	534.173	923.384	945.036	322.93	432.753	1043.04	746.757	NA	NA	NA	837.642	NA	NA	499.68	NA	901.89	NA	NA	NA	NA	254.955	NA	NA
Lsg1	5502.5	5652.8	5425.86	6125.86	4875.82	4893.11	5741.63	5247.04	4951.81	4667.16	4898.44	4462.61	4993.17	5282.47	5038.64	4293.67	5547.05	4886.44	6296.63	6173.39	6827.54	5490.14	5344.55	5211.83	7515.1	5886.09	5617.89	5931.23	4925.69	4434.89
Mocs1	1006.42	1056.95	966.071	901.568	1162.98	980.522	853.118	1066.38	883.2	913.826	1006.75	1018.9	655.201	882.215	647.313	676.501	1379.28	883.552	1587.18	1500.85	1129.3	1565.69	1349.41	867.152	1003.92	1152.36	616.265	1362.35	1157.66	1054.1
Efhd2	12887.3	16424.7	16993.2	16911.1	18980	20309.8	16380.1	16577.4	18959.3	16721	11834.7	15730.1	14195.2	18205.3	14287.5	12900.9	20691.9	20440.3	18112.6	18591.5	13713.7	14769	21313.1	25560.3	15145	13134	13993.9	14770.2	19047.8	20239.8
Mup4	1856.47	1774.43	1647.73	2028.22	1524.6	2145.25	NA	NA	NA	NA	NA	NA	716.386	NA	2195.34	1421.21	2304.89	3724.87	2147.26	3611.73	4086.16	4531.68	NA	NA	NA	NA	NA	625.573	NA	NA
D17h6s53e	1893.66	2286.26	1936.77	2742.54	2895.34	1939.35	2838.41	3031.8	2527.79	2654.81	3002.84	1877.1	2706.18	2690.61	1721.71	1750.24	2279.86	2802.06	3519.8	3357.92	2907.88	2735.9	2297.82	4918.28	2445.43	2313.6	2601.13	1585.77	2414.15	3268.64
Sorbs2	7700.91	7490.49	10246.4	10751.7	11499.1	11678	8819.88	8809.43	9158.09	9794.76	11480.1	10786.8	19871.8	19851.3	42477.4	37727.2	79410	72549.6	16664.5	15600.2	28954.6	27980.4	24815.8	26511.9	14066.6	15462.3	26076.5	23756.7	21806	22376.8
Siglec1	NA	727.73	652.008	258.213	791.884	363.468	362.14	1208.99	828.128	348.489	494.624	765.481	451.188	641.746	499.789	722.155	916.035	484.724	NA	NA	1100.39	682.679	1055.69	1512.21	418.852	342.299	1260.18	762.734	820.647	1427.47
Slc9a1	6401.34	5649.08	4456.8	5080.98	4064.83	4663.1	4531.34	3843.61	5057.14	5422.54	5569.53	5605.7	7602.29	6748.52	2564.36	3615.31	4736.23	5238.66	3914.4	4299.93	3354.66	3395.18	6639.09	5146.95	6420.29	4488.38	3829.19	4475.63	5407.68	5525.35
Hgh1	5224.95	3555.53	4207.42	4219.05	4953.17	3778.91	3029.77	3324.52	4140.79	3862.58	3167.85	3851.75	3373.4	3319.38	3929.65	3534.06	3224.98	2925.04	4139.12	3506.72	3832.45	3551.39	2748.54	3410.81	3410.93	3070.96	2503.66	2615.61	3773.19	3779.91
Serpinb1a	42557.5	48195.4	50975.2	51970.5	60951.1	59818.3	47145.8	50352	62641.7	58539.6	50721.7	51680.1	56491.9	59026.8	41557.1	41570.5	58304.4	62873.3	61910.6	78433.6	74376.1	74053.3	51431	57938.8	46984.1	47393.4	60070.4	59500.4	57453	56536.2
Poldip3	4512.81	4791.93	4372.85	4532.22	4640.88	5385.09	5241.06	4772.15	4797.75	5333.91	5349.98	5524.95	5921.98	4500.56	4759.57	5290.49	5420.77	4198.23	4307.32	4583.71	3740.93	4111.11	4929.71	5035.81	6195.25	5605.25	5340.94	4768.05	4230.9	4848.02
Cdc42ep4	4409.35	4295.06	4819.48	4863.5	5382.22	3654.56	4684.62	4286.91	5071.21	5072.34	4241.73	3985.3	4844.43	4314.8	3423.44	2296.22	7024	4780.41	2429.92	2940.36	3269.92	4289.26	4525.74	4247.86	3864.57	4637.13	4460.09	3804.06	4805.57	4598.92
Serpinb12	284053	291498	294586	303792	233086	246169	178415	170642	154677	165539	171991	164472	188932	173109	243258	249535	248941	314779	616173	685487	356415	347439	235676	217858	223062	217557	280978	287490	317662	335495
Xpo4	5333.34	4445.38	5147.65	5775.27	4152.94	5339.42	5401.15	6019.77	4439.16	4680.51	4929.18	5541.07	5324.31	5658.72	4822.61	4482.99	4268.17	4266.72	3581.5	3867.9	5739.1	4705.04	3209.11	5330.89	4147.35	4130.74	4267.35	5669.12	5046.07	4445.7
Ankrd52	954.001	936.619	1065.78	1068.08	1189.87	1376.7	767.447	797.799	1029.95	950.92	695.964	709.374	1061.82	914.497	1103.23	1298.76	1031.01	1219.54	883.943	1132.82	784.854	886.482	1158.07	747.64	1175.4	954.812	617.012	741.464	487.123	1233.35
Eif2b1	9053.89	10531.3	10914.8	10817.2	10020.1	10756.7	10745.1	10794.5	10245.3	10729.8	7785.33	9586.34	9669.04	10530.8	8686.46	6110.36	8080.22	10662.3	8495.31	11369.4	8888.93	11249	7935.84	9982.89	10696.4	10562.8	11011.9	12802.2	8651.12	10376.4
Iars2	20375.8	18496.6	18644.9	19805.3	21249	20833.6	19269.6	18869	19943.9	20834.4	19368.2	19109.9	23063	19559.2	20726.8	21325.5	19625.5	20451	18895.4	19012.4	23235.8	21629.1	17595.4	20690.8	23148.4	23601.5	20096.2	19638.3	20683.9	19619.8
Nit2	14765.3	15605.3	17063.6	16799.1	17623.9	18262.8	15481.2	16286.1	18884.1	19146.2	15650.1	15963.3	18149.7	21849	15615.6	14859.7	13668.5	14335.9	17256.1	17769.2	16388	16737.9	12362.3	13816.2	13620.7	11892.6	16391.6	14406.1	15850	15490.3
Aplp2	1076.99	1423.83	NA	901.442	NA	856.608	NA	609.446	812.618	1290.78	815.462	1249.81	735.344	1228.55	NA	NA	NA	1404.97	NA	695.665	1288.31	NA	1204.12	1238.59	1068.23	NA	NA	NA	NA	NA
Myh10	28634.3	26047.5	22672.9	25287.3	32983.7	33887.8	30086.1	27930.9	34308.7	34627.9	27920.8	24441.2	33572.9	34493.1	13579.8	11660.2	24727.8	26128.1	16329	18509.3	15965.2	14858.4	33341.1	31332.6	27277.6	24817.9	26746.6	25305.4	25053.6	26073.6
Tars1	46069.7	37030.6	39659.4	38026.6	41829.5	40549.6	39538.7	39307.6	38841.2	35641	36748.5	34377.9	42826.4	40607.2	31205.6	30175.3	34176	35213.4	33118.1	34012.9	44961.7	40158.8	36722.3	33955.4	41787.9	40317.1	41547.5	40925.5	35387.3	37829.4
Lap3	45000.9	43194.9	40499.2	45804.7	40257.1	44021	40856	46880.5	47352.2	47640.6	50687.7	42625.3	48324.7	47826.8	51331.4	45137.6	46852.6	46167.6	52846.5	54934.7	55917.9	52484.6	53112.9	50169	50819.1	50781.5	54677.7	58277	58092.2	56913.1
Wars1	23568.7	25821	22685.8	25718.3	21951.2	24686.5	21705.7	25432.2	25292.6	23734.6	23212.6	24006.9	24489.3	27374	17529.1	15269.8	27140.2	25662.6	23106.1	25682.4	24030.7	28850	24303.9	26269	21592.5	20959.8	22893.2	25909.4	23205.2	26006.2
Cap1	53096.3	50226.4	58463.7	59420.9	54173.9	56170.7	51855.1	52704.7	55472.9	54051	49143.7	47767.4	48301.2	53613.6	33728.9	37305	61108.7	61032.5	60409.6	71718.4	57433	58631.9	68757.2	62982.4	54570.4	52552.5	66889.3	67184.3	64652.6	59315.4
Ehd2	114242	119579	120772	113785	130024	131275	101619	111791	114789	122075	125952	118203	138292	131452	95113	93292.7	127941	126956	103502	98892.6	112555	115430	115394	110951	96147	88506.7	99644.2	97161.2	124489	119948
Hadha	66079.1	64563.5	64400.8	65577.8	60761	60276.7	59209	60280	59693.6	62597.6	69980.5	65727.5	62118.2	58304	71666.6	72233.3	66757.2	65262.9	64293.3	65981	76984.5	71552.8	60521.1	57449.2	68468.8	66625.9	68027.3	67156.4	65780.8	69978.5
Stk39	3765.24	3677.04	3392.78	4512.82	4072.13	4313.48	2201.46	2309.85	3679.36	4198.58	3356.41	3303.32	4840.7	4183.89	3033.95	2181.46	3565.31	3486.93	2650.48	3392.07	2179.62	2497.01	4726.9	4160.95	2811.26	2750.67	2566.61	3432.63	2598.95	3628.6
Pgm1	22869.4	21750	20080.8	21734.1	27774.1	28189.5	22348.2	22312.5	31702.7	32648.2	30892.7	30625.6	38294.4	37296.9	32176	31089	30926.8	31828.5	27942.7	26725.9	65058.3	61960.1	25174.6	24164.6	25368.4	27321.2	23608.6	24930.2	23555.2	24646.6
Tpp2	14182.2	14443.6	15875.7	14324.8	14984.1	14071.3	14177	14683.4	15026.2	15132.8	13249.1	13500.6	14184.8	15075.6	16847.2	12841	13852.2	14149.5	14837.9	14125.6	17122.5	16280.8	12010.3	12774.5	13815	14600.6	14113.5	14505.2	14781.2	14620.4
Cpeb4	784.54	1537.53	1568.23	1525.24	1609.3	1077.27	1269.92	1437.33	1467.29	1163.7	1404.64	1241.36	1545.66	1088.43	780.573	1406.44	1473.48	902.419	NA	NA	1652.42	1513.12	947.055	1115.4	1995.08	1512.78	1606.02	2625.01	1793.72	1496.65
Isyna1	3499.42	4008.39	3936.18	4202.33	5056.45	5260.01	3934.37	3244.71	4764.7	4474.4	4339.48	4729.56	3876.03	4663.7	5216.55	5618.95	4118.15	5218.68	4586.33	4616.87	4907.89	5388.39	3969.45	5727.89	2036.56	2694.31	3822.73	3920.36	4661.87	3850.3
Farsa	15153.7	16279.8	14104.5	14627.2	12919.1	13914.2	12982	15849.1	12128.6	12925.4	13628.1	11492.6	13253.6	13873.4	12496.2	11013.1	13718.4	15114.9	13737.6	13217.5	16214.4	15161.8	10100.3	12611.9	13846.9	13635.2	14007.1	14102.3	14171.9	13473.1
Anpep	32915.1	35627.3	36166.9	35227.2	39591.4	39692.1	41519.5	43594.3	49935.2	51572.8	40291.9	39837.7	44176.3	46660.6	31432.8	29343.3	35466.6	33383.1	34286.8	32214.7	36115.7	37203	41949.4	41823.4	36584.9	36891.6	37353.2	36784.6	39968.6	42002.3
Fermt1	2751.74	2608.11	2898.92	2849.93	1884.05	2513.33	2579.75	2612.96	1823.83	2850.49	2590.37	2962.8	2286.69	2552.55	2563.56	3275.54	2964.48	3542.51	2378.35	2460.97	2950.24	2562.31	2967.42	3334.44	3200.31	3156.49	2902.48	2361.69	2975.57	2744.01
Aldh1a2	2661.72	1544.71	1442.55	2036.4	2903	2168.77	2194.94	2560.21	2168.9	2368.09	1836.74	1315.62	2482.59	2587.97	2562.84	1920.96	1843.61	3526.28	2731.7	3576.34	1952.47	2575.96	4000.6	3322.47	3439.16	2361.02	2266.67	2655.77	3008.59	2736.28
Rps6ka6	1806.73	NA	NA	737.965	NA	NA	NA	NA	NA	NA	1736.23	NA	NA	NA	NA	1284.39	NA	NA	NA	625.258	1717.74	NA	NA	NA	NA	NA	988.842	NA	NA	NA
Mndal	690.386	555.815	680.903	430.24	743.833	643.141	936.714	615.956	756.35	910.491	686.853	571.315	958.188	486.819	341.718	83.4065	888.753	1001.98	620.196	866.544	975.645	1205.69	928.939	1023.93	527.636	537.058	723.322	603.221	571.197	509.909
Gtf2e1	1274.55	1062.74	1404.05	1367.11	1564.41	1178.54	1261.15	915.049	1394.23	1120.57	1456.57	845.855	1085.98	1215.11	1756.56	1309.88	2344.86	1956.46	1446.57	1374.09	1307.92	1574.74	986.907	1580.36	1669.36	2125.87	1123.38	1387.5	1857.07	1154.92
Uba2	39776.5	32473.6	36551	35711.6	36029	37937.3	39608.5	36365.4	37773.3	35836	36528.6	35071.8	35539.1	41582.5	37146.7	34240.3	38128.4	39053.8	41320.7	36679.6	36791.7	36093.6	42670.2	41471.4	43243.2	42737.2	38339	40816	44540.5	42879.4
Stard4	9372.84	9263.11	9384.43	11998.5	8431.46	7936.19	12304.8	12723.9	8366.51	9984.57	9535.83	10477.3	10336.1	8651.6	7194.92	8453.24	8327.82	8382.9	7776.59	8626.02	8997.73	9708.71	8824.57	10345.7	13373.2	11022.9	12158.2	17802.5	13641	13232
Abca1	809.181	523.861	516.259	683.314	1037.14	419.828	397.921	677.8	629.53	685.45	455.537	355.641	547.836	477.911	420.314	427.509	476.905	726.443	NA	654.241	693.308	671.563	404.697	NA	NA	NA	725.315	NA	1232.87	692.93
Sgcg	474.771	NA	NA	NA	NA	NA	NA	296.206	418.764	580.023	669.266	384.291	468.197	492.685	584.546	472.629	478.061	1345.36	NA	NA	3049.83	2421.5	NA	638.033	580.337	958.884	NA	607.466	830.077	NA
Nid2	16731.7	19872.7	19876.1	20453.9	17103.2	16640	19402.8	19433.5	21134.6	21331	17758.9	19938	21101.7	21063.9	14232.2	13699	22151.4	20597.9	18105.9	17232.5	16093	15274.1	16323.9	20533.2	15255.3	15548.9	21902.4	18755.8	20647	19419.1
Kprp	36542.6	30518.4	28335.3	33048.3	60153.1	62841.2	20889.6	22397.3	37859.6	36729.9	114214	90904.4	26655.7	24215.3	15677.2	18409.6	23663.5	23864	69610.7	73011.3	30745.4	28604.6	22154.7	21374.7	20513.5	22488.8	60670.2	66154.9	24509.4	21652
Exoc2	6364.18	6008.82	5626.67	6185.05	5333.48	6592.47	5999.36	6082.16	5915.55	6028.87	5457.75	5736.69	6591.82	5939.78	5682.89	5861.77	5857.08	5845.07	4629.1	5941.77	6258.89	6074.88	5831.52	5651.83	5916.32	6043.15	6361.13	7457.59	6191.37	5780.88
Aldh1l2	9666.77	9555.03	11419.8	10752.4	12520.6	12743.9	8040.11	8161.11	8501.78	8361.94	5290.38	6162.83	6664.97	7871.89	3249.29	2495.67	3787.73	4757.33	3865.47	4377.17	4211.09	4877.41	3652.86	2925.49	3532.96	2850.82	3518.59	3522.7	3010.9	3538.04
Aldh1l1	6350.52	5552.64	6801.12	7059.06	6829.58	7070.69	5979.3	7331.16	7395.57	7849.17	7111.94	6712.37	9128.4	8305.29	4890.76	4947.95	7733.91	8244.01	6506.7	6836.04	7859.52	6112.78	5536.69	6026.56	5696.92	5432.4	6454.27	6371.84	5729.25	5741.04
Lama5	14252.7	13097.8	14875.6	14322.7	11353.6	11654.3	15020	13904.1	13238.8	13958.3	12986.6	11812.9	15338.5	14715.3	14075.9	13641	21842.9	20646.6	15236.8	15962.4	13644.4	13435.5	14766.6	13839.8	14373.2	13498.8	14365.4	15266.3	15442.8	15589.3
Hgsnat	4673.86	5013.93	4327.32	3900.6	5551.9	5402.53	4126.97	3599.28	4280.73	4176.04	3784.61	3931.77	4399.61	4039.04	2948.55	2638.15	5098.55	3602.11	3652.74	3575.2	3941.8	4271.67	2724.93	3283.12	2299.16	2135.89	3299.66	3746.83	3452.78	3144.17
Ilf3	27758	27523.8	27361.8	25850.3	24765.5	24121.5	26020.5	24353.8	25616.4	25140.3	23816.5	22821.8	25725	25701	22343.2	17836.8	24602.8	26072.8	21810.3	23422.4	22720.5	23659.9	22415.1	24381.4	27249.4	24137.1	25021	27053.3	22267.1	23335.7
Fa2h	5241.49	5427.3	5395.65	6959.69	7466.35	7551.3	5290.33	4989.71	4930.21	5063.83	3618.41	4492.59	2918.65	3613.98	2842.28	2814.7	3943.12	4729.36	5637.81	3147.48	4160.76	4239.8	1762.3	1656.69	2944.41	2821.13	1516.53	1504.73	2036.58	1368.11
Napa	29151	24770.7	28608	30316.7	25096.2	27023.7	28493.1	30849	31660.7	29764.7	25980	24114.4	27887.6	26187.1	15159.1	13905.1	25161.4	23464.3	22378.8	29719	27403.5	26409.3	28060.1	31908	21311.2	20654.3	26415.2	22216	32207.5	30649.2
Naalad2	2163.39	2726.94	2424.04	2862.53	2977.74	2612.22	2437.93	2248.9	2402.55	2746.51	3053.99	2607.84	4279.52	3793.54	2447.54	2970.9	3663.26	3144.43	1906.81	1858.16	2591.92	2992.95	2886.94	1811.35	2310.93	2597.22	2294.79	2414.23	2157.29	2372.28
Ccdc93	4710.35	4057.3	4497.61	5284.81	5192.94	5678.06	4180.55	5171.93	5018.82	5125.86	4577.49	4062.1	5186.06	4558.65	4159.77	3656.52	5057.32	5316.57	4112.03	4694.66	4583.52	4185.52	4226.81	4496.87	4050.47	4155.4	4914.02	4436.17	3283.94	4601.4
Col6a1	472745	514958	445135	468863	351752	374761	432779	450842	503199	541681	406049	402719	432371	416875	330422	335734	536622	561778	474672	496677	370717	393587	422333	442662	422165	417190	417549	415587	425409	441168
Rps6ka1;Rps6ka2;Rps6ka3	16500.5	16330.4	22096.6	21227.3	22727.4	23809.7	19736.9	20925.7	20021.4	23224.9	16905.6	17618.1	21838.7	20098.1	17784.4	17555.4	31830.2	35580.1	25729.1	30515.7	22869.9	19227.2	29728.7	21522.1	30369.2	31525.4	26083.7	24145.9	23803.4	23315.5
Enpep	2453.95	2683.67	2847.18	3159.85	3954.19	3945.52	2921.2	2951.22	3390.36	3212.14	3274.84	2945.54	4583.57	2783.39	3887.12	3438.2	5237.94	5665.59	2809.07	2576.1	4037.12	4396.15	4818.07	4500.36	3640.3	3756.71	3178.32	4184.87	4175.66	3802.83
Mtif2	1250.17	2127.29	1603.28	1596.65	1811.5	1742.95	2263.39	1513.31	2039.83	1915.58	1202.44	1832.14	873.989	1490.56	1677.15	1473.75	1552.23	1860.66	1915.11	1482.55	1736.4	1393.62	1927.9	1741.16	1969.67	1642.34	2268.35	1881.16	1140.85	1294.42
Morf4l2	2291.17	2016.22	2938.78	2488.17	2886.26	2378.54	2727.2	2667.2	2387.79	1952	2712.64	1754.34	2159	2263.37	1213.88	2417.09	3045.73	3657.62	2116.73	2641.9	3340.42	1923.17	1856.65	2296.68	2693.82	2385.6	1957.79	2444.95	2172.49	2375.12
Samhd1	43206.9	43038.9	42529.4	41522.5	49908.2	46667.8	31013	30696.9	32747.8	32445.1	35208.1	31352.7	35040.3	35619	25278.5	20944.6	49004	49599.4	47199.4	45790.3	50853.3	49862	45796	41077.2	36265.4	34752.6	42577.2	39767.9	40025.1	40092.3
Coro6	NA	NA	NA	NA	NA	NA	NA	NA	NA	522.664	NA	NA	NA	NA	NA	NA	NA	NA	NA	NA	1316.58	1995.16	NA	NA	NA	NA	NA	NA	NA	NA
Coro1a	19216	19460.8	22046.4	20660.3	29189.1	29744.4	23831.5	21812.3	26606	26006.9	21927.5	23797.4	20555	24956.1	12736.1	12669.7	26207.8	29521.2	34250.9	30738	36102.6	35952.8	47006.7	47878.4	25855.3	22195.3	25689.3	25770.7	25638.1	23800.8
Polr2h	6583.53	5577.76	7248.61	6326.32	7076.04	6535.55	7435.71	7050.77	6964.09	7812.12	6348.13	6126.81	10442.9	6294.34	4177.07	3753.48	6784.34	7770.03	5023.96	7039.17	7852.22	5938.33	7989	5136	6836.59	9144.41	7321.88	5837.59	6251.47	7049.08
Nol11	4294.29	4503.51	4430.42	4702.28	3544.27	4169.51	4073.62	5426.7	3692.44	4559.57	4120.62	5175.37	4404.13	3541.66	3674.49	3608.59	4798.32	3871.38	4566.94	4368.54	4569.54	5099.63	4525.48	3965.69	4482.72	5608.8	4680.42	4041.74	4043.57	3616.56
Ehd1;Ehd3	32155.4	32037.1	32753	28153.2	38701.8	39560.8	33268.1	27497.3	39654.8	38274.3	37094.1	35202.8	42820.6	44632.1	33787.9	25454.7	37729.1	33727.6	28734.9	28608.5	36945.6	31679.9	34511.6	34642.4	28031.7	25411.8	30548.1	30414.7	34451.8	29502.4
Prph	17772.2	17269.9	21936.7	20820.6	23850.9	22041	19294.3	18824.7	26263.2	22080.1	29432.2	25462.2	33391.3	34719.6	16812.4	14951.8	50135.6	44185.2	34616.6	35183.6	37498.1	34865.4	28153.6	27009.5	18400.6	15660.5	30438.2	27503.8	21987.1	19494.5
Calml3	543576	414546	552939	453753	476407	388881	491867	456659	425500	393229	524887	412288	432814	347546	439659	355320	917228	765024	546808	566471	577119	515805	919373	883485	732919	865345	367377	325069	898236	797688
Cdk6	6399.26	6113.4	5769.59	6307.9	6472.4	6858.21	7055.61	7293.44	6367.57	5718.36	5800.64	6275.11	6960.46	6517.61	4651.36	4421.32	7382.68	5826.37	5746	6666.72	7779.23	6407.81	7219.1	7495.98	7403.28	7935.41	7833.33	6661.6	8735.36	7577.06
Ehd4	39379.1	37055.7	41007.2	38409.8	51216.1	47984	35614.8	35507.2	39452.7	38991.1	39465	39613.9	44047.1	41822.5	32327.1	31236	48874.6	49300.2	37063.4	38030.7	49785.5	47320.3	48446.7	47509.4	35220.8	35228.9	38228.9	37488.8	47161	43295.8
Rala	18561.8	20029	27193.6	24917.4	24303.6	17975.1	19455.9	22642.9	21194	20762.1	19324.2	19406.1	21316.6	21376.4	9710.05	10536.7	36906.7	37908.7	25425	25988	22120.5	21643.9	27132.5	28381.6	25639.3	28268.7	34331.8	27854.5	25147	20958.3
Shmt1	24798.3	21865	21310.7	26761.6	21284.4	22539.4	21454.9	21497.1	19096.3	21159.3	17608.6	19197.7	24137.4	20032.6	16590.2	15384.7	18757.4	24619	23804.4	24729	24507.1	22828.8	21687.5	19906.3	21589.6	21470.1	22073	22611.1	20729.2	21645.2
Rps14	246399	322490	332358	363208	269702	295994	382989	296194	320653	305258	338928	364189	268621	325990	225468	209784	362184	407295	424669	456158	388551	357406	277858	367034	324150	315460	399584	435834	356584	412417
Tf	222863	240484	224171	216500	400609	385289	255988	238635	369220	356436	354480	328382	452591	503052	169383	174731	323860	318350	296456	309092	231658	254628	411286	438022	288691	305290	406793	400229	360906	330953
Ica	6105.29	4893.94	6013.48	5072.84	9623.35	10236.5	5379.2	5486.79	6824.2	6903.92	8385.38	7032.02	8733.62	10258.3	5889.2	5801.68	7148.1	7770.54	5663.55	6796.39	5856.6	6317.51	7784.45	7388.37	6013.57	6675.69	6191.03	6205.79	5221.35	6700.16
Serpinb7	35723.6	38345.9	40036.3	44230.5	30276.3	32718.1	48964.2	52741.9	44395.6	48096.8	54568.3	54023.6	52625.3	58692.3	38650.3	45975	27988.8	31336.5	36566.6	42774.1	47701.6	51909.6	33286.6	33131.4	40596.4	41980.4	62629.1	70323	61725.2	66374.6
Slc5a1	4108	4161.78	5065.28	5655.36	2913.9	4344.23	5069.13	5171.23	3882.71	4377.06	5311.65	3760.52	5042.76	4596.3	8370.95	7976.19	5543.67	6988.34	7037.45	7066.59	7482.11	3948.15	8107.49	7154.91	11734.4	13025	8100.52	7248.27	8061.57	7157.18
C5	3151.02	3375.3	3047.6	3512.41	3864.78	4049.11	2202.43	2000.75	2178.24	2355.71	2234.95	1609.42	3082.37	2992.97	2583.55	2712.97	6671.4	7029.28	5738.86	5489.3	7066.93	7059.8	2280.45	2688.08	2446.11	2463.49	2871.92	2810.27	2564.4	2109.39
Ppp1r14b	2842.16	2412.95	1782.36	2327.56	1931.45	3740.28	1522.58	1553.67	2299.53	4544.45	1770.17	1903.35	3550.04	2167.9	706.023	816.433	868.582	704.564	2297.8	2227.21	1438.35	2267.59	1800.05	1304.1	2161.04	1744.44	1230.35	910.779	986.49	4930.95
Acot1;Acot4;Acot5;Acot6	1157.1	1180.47	1420.16	1021.26	1346.86	801.281	1455.22	1306.53	1885.32	NA	NA	465.779	2018.29	1122.21	1709.77	NA	626.507	784.148	NA	NA	NA	NA	1317.85	697.136	1694.54	NA	1515.23	1585.7	1018.51	646.005
Smpd4	4451.51	3595.5	3514.05	3836.99	3864.39	3061.31	3816.87	4209.45	3698.71	3349.41	4246.54	3959.53	3662.06	3316.83	4212.34	3736.02	3821.09	2914.88	3355.63	3412.68	3575.82	3886.77	3186.47	2855.56	4095.59	3773.94	3064.12	3230.25	3851.09	3522.82
Ncbp3	5788.87	5479.13	6127.09	5628.92	5207.98	5324.49	6117.96	6065.35	5692.41	6429.06	5440.39	6243.38	5693.45	5591.2	5084.19	5264.32	5658.12	5240.06	5419.06	4700.8	5254.01	5215.07	4933.78	4594.54	6449.43	5749.53	5727.38	5971.76	5271.04	5316.35
Krt6b	58238.7	63280.9	37697.3	41043.7	21987.1	19433.9	3656.89	3791.41	3095.09	2798.67	4498.15	4309.21	3359.63	6229.1	5111.52	5276.9	259259	265314	694530	663915	575128	559917	12481	13693.1	16989.4	15761.9	41930.5	35610.9	20364.5	21270.7
Git2	4553.39	3917.47	3986.93	4038.59	3948.42	4216.17	3393.23	4377.98	4512.58	4037.4	3187.73	3065.86	4111.93	3400.84	2369.21	2058.48	4268.28	3372.03	2651.32	2323.61	3914.64	4032.35	3362.75	3767.35	2337.34	3544.87	4580.61	3671.33	3822.68	3666.76
Rnaseh2a	2556.41	2036.52	3206.16	2597.42	2345.24	3270.7	2857.44	2438.34	2670.49	3182.07	2835.91	2122.16	1622.61	2680.28	1986.58	2236.4	2106.48	2149.53	3122.33	3413.81	3300.96	2237.11	3003.18	2769.11	2489.71	4020.98	2266.87	1642.92	2689.52	2967.01
Krt7	13422.8	13113.9	8429.08	7826.08	8614.56	9453.46	10121.5	9862.11	12729.6	12987.4	10817.9	10130.6	18964.6	18312.9	3023.66	3591.24	6287.21	6026.6	3892.95	3557.39	2583.25	1670.15	10939.6	10416.5	11714.3	9276.24	7594.93	7897.08	8012.28	7489.77
Lamc2	25383.9	24430.2	20139.8	19249.4	11564.9	15022.4	17912.3	18688.9	14898.9	17134.2	16651.8	14415.9	16113	16389.2	17737.8	20225.3	22503.2	26827.3	30034.7	28783.1	20323.4	16994.6	20599.9	21835.6	22495.9	22852.7	16107.8	16913.8	17912.6	21376.4
Krt6a	112483	85807.1	103712	111196	93162.6	76453.6	66934.8	57222.5	52600.5	44984.6	51641.8	40889	52766.6	49572.2	70319.4	59116.9	418003	338044	533009	526375	583965	550774	127722	84669.4	155204	140879	154910	138496	116406	111403
Cmtr1	4129.57	4307.1	4090.27	3549.39	3996.36	3416.31	4004.62	4045.7	4466.58	4123.01	3526.46	4187.22	4812.99	4358.36	3766.84	3634.28	4466.22	3629.54	3210.91	3912.86	4417.15	4592.55	4481.63	3139.53	4259.25	4528.51	3531.27	4110.83	3927.73	3784.67
Cep170b	6663.86	5286.79	6234.29	5641.68	5499.1	5332.16	6049.02	5791.83	5649.75	5684.99	4862.05	5471.04	5410.41	4542.15	5193.39	5027.61	5773.26	5974.54	5141.15	5346.77	4811.92	5418.27	5318.37	5951.63	6568.47	7042.25	6063.46	6975.19	6123.11	6343.41
Trim29	402040	423792	491003	466722	387424	388427	476499	449129	419292	408922	394332	410854	341719	362603	436859	396869	497781	466789	511499	544715	453614	455118	512046	459285	568544	568919	635690	602177	616747	558829
Pacsin3	4282.2	3970.48	4115.1	4085.7	3760.31	3261.14	3968.76	3961.72	4798.44	4882.43	3901.87	3979.18	4563.37	4197.26	2948.34	2346.91	6297.24	5630.85	3371.21	3057.02	10967.4	9084.34	3618.52	3888.36	4755.09	5319.46	3249.45	3047.85	4071.02	4069.66
Susd2	11998.5	11017.7	13435.2	12598	12993.4	13824.9	20194.5	20342.6	19901.5	19361.9	19484.1	19563.1	18348.2	18516.9	26408.4	22454.1	17274.7	16742.5	11917	16202.7	17892	18486.2	17292.4	16449.2	18334	17232	20674.9	21903.3	20284.2	20020.6
Csad	14727.2	14337.8	13076	13336.8	14947	16526.6	10897.7	12226.8	17196.8	16664.5	15760.2	13676.2	23378.9	21644.1	12870.4	12759.8	11214.5	11058	8835.56	7887.74	8942.09	8690.97	13800.4	12178.4	14147.3	10796.1	12203	13286.1	10850.5	11567.7
Ncor1	1728.43	1230.08	1297.55	1310.32	1420.29	1510.83	1314.2	1209.32	1523.79	1309.84	1178.08	1266.67	1130.47	1239.52	1383.87	859.347	1632.48	1089.36	1837.76	1248.7	1316.18	932.016	1550.5	1069.18	1106.66	1868.41	903.808	1020.25	1110.86	1357.29
Lnpk	6169.87	6119.72	5453.89	5536.41	5518.77	6200.62	5528.8	6162.83	5785.07	5794.7	4834.51	4817.33	5535.68	4602.28	3865.76	3516.39	5490.79	6058.24	5381.68	4533.48	7045.85	5954.15	5298.1	4286.57	5819.7	5754.84	5183.6	4515.34	4887.49	5092.74
Upf1	26573.2	24612.5	25376.2	27286.1	25464.5	25214.4	26724.8	28409.5	25715.5	27299.2	24954.6	26605.9	25321.7	25796.7	22760.3	21025.3	25014.1	24293.6	23894.4	24070.5	27381.3	25516.9	23846.1	22662.7	27963.3	28705.2	28921.6	30271.1	27096	24974.6
Man1b1	3053.42	2995.93	2847.41	3259.66	2634.51	2612.69	2567.19	2559.81	2650.46	3080.42	2517.08	2619.91	2614.34	2159.01	1643.98	1510.98	3026.39	1513.82	1970.61	2378.77	1990.31	2634.41	2501.74	1825.37	2079.76	2628.82	1650.59	2390.5	2889.22	2640.1
Dcps	11854.8	9848.79	11056.4	9941.53	10751.9	10896.8	10126.1	10302.9	11102.9	10630.7	11246.1	10204.2	11683.2	11872	10310.2	9926.96	9540.81	9922.75	9321.09	9039.94	9591.59	11487.5	12953	13781.8	15563	12997.1	10181.5	10824.6	12040.4	13819.5
Gale	12150.4	11047.7	10604.3	11646.5	11826.4	11352.4	10200.5	9722.97	9914.48	9448.65	11412.8	8511.85	10582.5	10848.2	9185.23	8962.6	10162.4	9705.63	11553.8	11376.5	11136.9	10665.7	12229.1	11640.4	10359.4	9528.05	9996.29	10307.6	9744.54	10973.8
Nucb1	33932.6	33472.2	34784.6	34451.4	41872.2	37298.2	29960.3	28957.3	34742.9	34146.2	25701.9	27478.4	31996.2	32246.6	15963.8	13338.8	23903.7	23862.7	18940.1	20109.6	20717.2	21250.5	30051.6	29140.8	21865.2	21124.8	15967	15224.7	25469.4	25054
Prelp	146771	158909	158989	155461	140683	139715	118693	111376	148169	137988	135790	134980	130099	143366	225165	240944	264126	241595	310347	331497	213163	226792	216561	213469	156367	162746	115149	115124	257645	243758
Samd9l	1541.99	1977.97	2073.99	1780.33	2367.78	2542.35	1557.8	2280.57	1778.74	1981.33	1664.36	2025.48	2418.82	2027.16	1677.23	1520.12	2398.86	2135.17	1687.2	1970.25	2211.66	1950.15	2857.24	2611.77	2303.44	2353.96	2036.96	2541.68	2010.68	1866.58
Skt	4095.75	4028.46	4115.04	3906.85	3840.05	3963.49	3894.32	3714.83	3854.59	3751.7	3196.84	3018.73	3411.48	3406.7	3521.67	3370.98	4233.64	3693.37	3766.59	3393.62	3238.82	3698.26	3385.8	3483.63	4167.31	4272.91	3921.58	3416.55	3432.71	3396.82
Usp4	18707.8	17255.1	18714.4	19796.3	17237.8	18993	17666.7	18411.1	15984.2	17737.4	17042.2	16912.2	17161.4	16946.2	13843.4	13916.9	18487	17770.7	19979.3	19340	22417.1	20667.6	18754.9	18847.2	21517.7	19664	22157.2	21108.6	19967.8	18949.7
Usp15	7806.71	6811.83	8084.48	7663.92	7021.14	7893.16	7256.49	8069.56	6686.51	7942.21	7642.85	7231.87	7128.45	7626.16	6543.87	6298.58	7202.64	7159.89	7496.86	7663.72	8486.38	8069.98	7659.39	7049.05	7698.28	8072.31	7955.07	7777.71	6926.66	7830.66
Psmc4	39909.1	39780.4	40877.6	40953.8	40373.6	38880.2	41184.2	44912.5	40751.9	38671.2	34564.1	33702.8	38976.6	38961.5	32017.1	30521.9	42271.1	43457.4	40960.7	48564.6	42239.6	44795.8	37284.2	37793.8	44486	41476.1	43698.6	40446.5	45800.8	45964.5
Septin9	23215.8	20590.1	21532	21462.7	23141.3	22250.8	22030.7	21096.1	19891.8	22127.6	20764	19804.9	22042.7	20908	17793.8	15626	22008.9	23717.6	21107.7	20574.5	20693.6	18740.8	25094.7	22278.8	23965.4	23154.2	21310.5	20451.1	23168.5	21786.2
Septin7	48888.3	51524.7	55700.3	57720.8	58366.4	59995.6	61253.9	60018.9	59748.5	60653.8	48370.3	48014.4	55849.7	60282.6	40823.9	36713.6	73690.9	68475.2	55670.1	52034.8	52462.5	53282.2	61627.5	67669.8	54905.6	50923.4	68924.4	70405.6	63127.9	62747.8
Septin4	2788.66	2596.74	4305.77	3085.98	2127.33	2163.13	2536.85	3385.13	4123.94	3141.55	3871.91	3868.64	1007.31	3283.13	4400.93	4599.25	3271.72	1888.23	1907.31	4058.68	1663.65	3231.19	2301.22	1232.19	3241.57	3129.65	2508.41	1689.17	2285.04	3326.35
Stxbp2	4265.66	4412.06	5284.67	5411.12	4850.32	3532.13	5622.32	6731.57	5116.85	4861.92	5498.56	5850.9	5649.88	4730.04	5054.5	4443.69	5554.27	6811.02	6544.8	5043.12	5825.38	5737.37	6339.56	5685.58	5662.93	6291.09	5927.82	5821.08	6083.51	5805.84
Erh	NA	5304.21	5954.2	5817.32	5629.15	5900.55	4781.01	NA	6377.54	6002.33	NA	4386.12	2328.05	4206.52	4050.26	3734.11	3564.99	NA	NA	4659.4	2631.95	4453.79	4584.1	NA	4467.5	4023.1	1277.31	1218	6884.15	NA
Dpp3	52975.1	55369.4	60784.3	60551.5	56647.2	58129.8	53875.3	55582.9	52172.4	52924.3	49005	46420.1	49907.9	53939.8	42614.9	42765.1	55689	58357.6	67960.3	77954.4	57983.6	62372	54295.7	55606.2	52876.9	53550.8	61710.1	62219.6	63847.1	60068.6
Nufip2	2967.49	2446.09	3041.02	2187.67	2682.37	2601.67	2455.64	2866.58	2458.07	2314.99	2355.25	2523.35	2752.31	2588.69	2147.78	1281.78	2197.9	2342.87	2249.64	2462.69	2216.22	2571.11	2472.11	2878.7	2824.06	2583.9	2481.78	2455.15	2296.93	2543.04
Ehmt1	876.725	710.355	703.717	1188.04	960.799	401.247	1146.27	947.271	1814.95	606.483	806.98	736.979	863.327	824.538	579.985	382.302	708.094	1019.11	678.814	NA	731.634	611.242	865.381	892.524	935.369	894.449	927.149	785.698	897.96	522.571
Brd3	3597.1	3961.29	4532.2	3598.43	4875.38	4463.03	4814.53	4597.2	4699.82	3296.23	3187.69	3905.26	3394.06	4030.02	2758.07	2451.66	3384.94	4971.52	4173.57	2225.28	2626.68	3109.82	2165.2	2829.04	3498.08	3063.93	3090.02	3220.91	3729.05	4215.19
Safb2	2830.67	1981.86	2475.53	2790.26	2431.68	2116.92	2757.08	3014.02	1995.46	2426.65	2835.88	2202.09	3391.36	2529.19	1956.5	1580.69	2358.13	2928	2464.11	2482.19	2540.32	2664.25	2322.6	2605.9	2788.53	2574.56	3095.76	2966.28	2683.14	2636.68
Fkbp10	46340.2	49444.8	45733.1	44464.8	65483.9	61842.7	39427.1	36089.8	53153.4	51878	26073.8	27561.1	40371.4	40220.3	7475.01	6320.38	11637.8	12031.2	10608.3	12168	12383.5	12694.1	10480.5	9999.78	7199.59	6502.34	7350.37	7028.86	8102.64	8768.22
Magt1	18211.2	16842.3	18657.1	17520.9	19558.1	17485.6	19678.3	20923.2	19347.6	20549.5	21828.6	17157.9	17721.5	17874.9	17339	13007.7	15256.2	15230.3	12840.6	14539.1	17299	17432	19446.9	15406.5	17794.6	15758.2	17174.2	17422.4	15009.3	14113.5
Des	11306	12704.3	13625	13828.2	14727	16186.2	11369.6	11641.9	32777.4	33815.7	34423.1	36386.2	34762.3	39438.2	44704.6	46334.8	88257.1	93163.5	33508.6	34430.9	273798	268853	17460.2	18724.5	25383.9	21949	15770.4	17202.4	13204.5	15524.9
Scly	1081.44	1382.2	1353.6	1454.57	2003.52	1928.03	1149.72	1307.13	2065.24	1182.76	597.594	1227.48	2181.65	1881.83	790.639	410.841	1216.79	1113.2	1096.6	865.264	1850.49	993.361	1162.93	1906.74	1313.35	690.465	1190.31	822.4	1674.81	1366.61
Ankfy1	10059.9	9520.49	8677.21	9184.21	9640.59	10502.2	8418.75	8936.23	8265.65	10084.8	8347.28	7469.84	9332.75	8562.96	7146.39	6809.49	9726.33	9039.15	7678.87	7876.25	10259.8	9534.12	9786.36	9782.62	9341.72	7262.75	10514.5	10673.8	8717.08	8322.78
Sun2	24183.7	20347.9	24051.4	22714.4	19293.6	19432	26998.9	25928	24833.7	25172.3	24309.3	20900.7	23821.5	21691.5	15982.1	14251.5	22453.6	23576.9	23732.6	21738.4	25693.5	23837.9	27587.6	24403.8	32735.6	29822.1	28650.9	28856.1	26586.5	25613.1
Krt84	16928.7	17191.5	31085.8	30332.5	32203.4	30153.5	27555.7	27609.2	30666.7	29197.7	18806.6	22175.7	21689.9	22019.1	45643.1	41224.7	46397.6	50070.2	34795.8	38489.3	34354.7	34081.8	19993.8	20804.9	20355.5	20090.1	21313.6	20907	19053.8	17899.8
Atp2b1;Atp2b4	20437.6	17428.3	21169.7	19188.3	19475.3	18261.6	19562.7	18209.3	19444.2	18666.7	17342.1	20224.4	20058.1	17328.7	13640.2	15855.2	21714.5	22898.3	19381.3	16659	20063.7	16855.7	19297.3	23810.7	20714.9	21850.5	24029.3	23309.9	19449.3	20110.8
Gphn	8731.14	7946.17	7415.94	7643.46	7867.41	7794.35	8810.38	7812.29	7722.86	7639.44	8455.88	7466.63	9044.68	8708.26	7798.19	7762.8	7047.26	7820.44	11246.2	11006.9	8688	8354.08	7241.74	6420.27	7689.49	8476.41	8420.1	8752.79	9411.09	8999.14
Ssrp1	18878.9	17465	17907.4	17083.9	15309.7	15407.3	16706	18703.8	18094.9	16629.9	20752.6	17888.7	19192.3	16304.4	14403.1	12686.8	17417.8	18687.6	17749.3	18178.4	20838.7	20046.7	18101.9	16706.3	22605	20659.1	20393.5	19919.3	16216.4	16913.1
Svil	4427.02	4042.23	4019.64	4220.68	4306.63	4795.47	4368.91	4415.4	4870.36	5152.14	4196.41	3753.92	4904.25	5077.08	3139.77	3096.63	4428.65	4696.13	3461.13	3371.53	4389.02	3878.36	4838.48	4777.68	4769.86	4300.96	3698.26	3788.56	3414.14	3689.88
Pstk	787.784	964.982	1228.17	2034.21	1972.96	1431.55	922.187	1442.23	1710.09	1108.22	986.642	2103.61	1430.83	1865.42	1165.87	NA	1507.88	1198.7	1279.4	1490.79	1213.33	1113.94	1634.85	2134.18	1088.48	2172.07	1447.47	1628.45	1463.53	481.938
Ncstn	32295	30245.4	29132.3	28199.7	24833.1	26726.4	26884.9	28274.2	26201.9	27679	29285.2	29238.3	25467.5	27534.6	26848	23835.7	16829.6	18756.5	33125.5	31236.6	29209.9	26581.8	20261.6	21662.1	23456.5	20984.2	22441.4	24031.8	25305.8	28964
Amacr	2127.75	2046.74	2614.71	2323.6	2720	2699.59	2489.26	2081.5	2607.88	2274.77	2081.71	1855.69	2007.42	2196.92	2645.43	1786.64	2370.87	2509.72	2101.27	1996.26	2294	2057.61	1656.94	1889.98	2469.03	2243.66	1921.71	1311.23	1739.86	2347.89
Bzw2	18432.3	18146.9	17755.8	16768.7	17364.5	16508.6	17904.2	18914.5	15361.1	16845.6	17733.6	17611.9	22087.2	18007.2	18569.3	18117.3	17246	17642.3	16240	16414.2	19303.6	20501.9	14850	16711.6	21887.5	21990.3	12672.9	13487.4	15786.9	16538.1
Col17a1	70231.3	65269.3	57628.6	60099.2	44970.8	47406.2	48047.7	51920.1	48634.4	52814.9	46274.8	47264	43560.4	40700.2	45207	42507.1	54392.5	55152.7	65114.6	64633.7	38484.2	42053.9	51243.5	48616.2	57091.9	53527.6	47350.7	48679.2	49538.4	51567.2
Smarcal1	1110.31	791.722	1000.05	1090.9	808.147	1150.96	917.785	708.14	504.575	985.589	660.347	860.069	814.508	953.734	592.795	1519.92	NA	1346.97	NA	1233.55	828.414	694.556	968.6	NA	1150.49	925.866	633.922	533.715	NA	1188.22
Bbs1	2457.02	2807.13	2481.8	2342.88	5266.79	3929.55	3195.13	2573.13	NA	3670.69	1354.39	3137.09	3614.99	4035.81	4283.05	2751.56	3792.11	2700.38	NA	NA	2418.53	1606.45	3018.65	4804.62	3076.79	3357.46	3067.61	2328.95	3934.06	1964.05
Cav2	17424.7	14458.6	20656.3	22605.5	16240.6	20433.1	18498.4	20976.4	20576.9	25257.8	14594.3	15523.6	17296.3	17085.7	18357.6	18439.8	19669.3	20814.6	14604.2	18599.9	18404	14378.9	19152.9	15591.4	12251.9	12514.2	16116.9	18954.1	19033.8	16591
Trim28	53604.4	55759.7	51818.8	48154	50077.5	49327.9	51903.2	56556.8	54136.5	51205.9	48671.7	48739	51860.1	46281.1	35384.9	27911	46490	44408.4	47520.7	43478	41977.2	46373.6	46654	49308.9	49622	49914.3	46733.4	48331.4	48006.6	47883.2
Eif2d	2049.65	2671.64	2348.18	2065.61	2049.82	2291.73	2141.53	2035.42	2091.55	1936.17	1980.41	1734.82	1810.32	1877.44	1299.24	1696.7	2214.88	2656.82	2193.58	1746.71	2551.83	2099.41	1420.07	1639.7	1720.57	1378.51	2189.83	2230.79	1876.61	2600.43
Nop14	3586.81	3237.35	3567.64	3920.62	2779.92	3161.24	2952.61	3424.7	2709.71	2733.11	2530.3	3026.33	3308.26	2872.44	1542.55	920.781	3281.66	2777.55	2414.49	2807.76	3515.33	2985.87	3266.45	2757.9	3707.46	3245.82	3066.42	3486.52	1963.6	2475.58
Idua	937.214	NA	NA	1219.52	NA	NA	1402.83	1815.71	NA	853.772	1010.5	1173.66	1230.88	1517.58	NA	457.085	NA	874.466	NA	360.863	NA	NA	NA	NA	NA	1213.45	NA	1420.83	NA	859.78
Esrp2	15097.4	13438.9	15089	14875.5	12393	12846.7	14199.7	15587	13124.6	12476.4	14355.3	13836.5	10460.2	11931.1	11752.5	11041.3	12295.9	11966.5	12084.5	13310.2	12617.7	13742.5	13134.5	12355	14651.4	15177.4	13803.5	13973	14157	14263.9
Spta1;Sptan1	74915.9	67283.8	72593.2	71242.5	72296.3	74127.6	75205.5	75003.4	73852.2	69613.1	52703.3	53433.4	70436.4	69782.5	30338.2	31423.3	74499.5	73995.4	61277.1	69917.8	66748.3	70838.4	92191.8	90936	71768.7	67793.3	71992.4	68238.2	69519.8	64573.8
Sptan1	105297	106332	113283	112080	106357	108934	109231	106380	109136	108803	104077	95242.7	101936	101815	78686.1	78334.2	117107	115545	109213	108958	100892	101318	130720	124544	113833	114505	102468	98122.8	122465	118955
Gbp2	2792.56	2386.42	2173.32	2247.3	2799.56	3783.92	2613.38	2143.63	3112.23	2706.46	2573.87	2624.29	2677.22	2702.69	2143.58	1170.14	2900.41	4491.4	2329.79	2356.24	2811.68	2672.69	5269.63	5525.19	3534.79	3135.62	4476.86	3978.03	4159.82	3239.1
Hsdl2	28332	26502.1	24228.1	29727.8	22314.4	25659.2	24985.1	28926	24724.8	31151.1	26043.9	24939.3	26306.5	25174	24770.7	25577.4	24369.8	24750.3	26421.3	27430.5	27940.5	26957.3	24983	25743.8	28211	25446.8	26949.6	34987	25552.9	32458.5
Prkca	3472.55	4207.15	2875.36	4404.65	2537.16	2278	3000.7	3409.5	4203.57	3492.77	2345.45	1990.43	2848.87	3135.1	2485.39	2341.56	8867.31	2656.53	11352.6	1587.88	3755.21	4811.1	1874.95	3280.81	2341.45	1700.52	4568.26	3598.31	4200.4	3080.3
Parl	1468.42	1982.91	1798.54	1807.64	1551.35	1892.94	1866.32	2345.51	1844.66	1781.11	2295.85	1879.86	1879.3	1876.62	2009.1	1980.19	2368.95	1770.35	2150.78	1789.58	2344.27	3280.99	3155.13	1521.59	1105.02	2050.73	2260.88	1797.14	2118.9	1910.23
Asns	13833.2	11748.1	13062.4	12412.3	11288.3	11777.6	11437.8	11807.5	10855.7	9930.68	14401.9	13769.1	12087.3	12355.1	21267.5	15773.1	9880.78	11232.1	13996.5	12101.9	15687.6	16217.1	9142.02	9598.72	15075.7	12133.7	12354.9	10759.4	10387	10663.8
Cox4i1	68533.1	73759.4	74745.9	76245.5	75250	66761.2	65915.2	62668	70584.5	71501.9	54060.9	52337.8	65845.2	64818.4	58256.6	55222.3	70966.2	73598.8	104631	101171	79074.4	77964.2	75969.7	83035.3	54052.6	60847.9	47349.2	46359.7	100097	92232.6
Atp6v1a	76468.8	74550.6	76022.8	71604.3	67897.3	67218.5	71573.5	63008.2	67967.8	67458.3	67692.4	64980.8	74570	74787.3	72332.6	64034.5	79107.4	79539	78385.1	78008.3	69312.3	71896.2	77321.7	81558.2	74362.8	77242.3	85178.3	84535.3	87294.8	79293.1
Luc7l;Luc7l2	13767.2	24709.8	17364.3	22605.4	16054.2	21630.1	18641.1	20370.2	19119	21112.3	8820.01	22117.8	9394.82	19651.8	14561.4	16452.4	22012.9	26069.8	15572.2	21976.5	18839.2	19032.2	20733.6	22935.2	24111.8	24809.9	18456.7	23346.6	15245.7	19418.6
Qsox1	15481.7	13929.2	16932.6	17073.7	14134.5	16632.2	16907.5	16801.8	14989.2	14473.8	22373.9	20318.9	19549.3	18581.1	17783.6	17244	14036	16437.4	15254.1	19941.5	19777.9	17140.6	18218.8	18562.1	16597.4	18455.2	23281.8	20671.6	24347.7	22298
Fnbp1	4045.88	3986.85	4498.92	3934.43	5285.97	5615.45	3903.83	4471.38	4280.05	4339.78	4165.16	4585.29	4903.62	5268.27	2707.45	2625.63	4135.41	3713.05	3031.84	2041.93	4779.71	3309.4	4007.93	4383.6	3113.36	3564.9	3189.73	2418.24	3692.11	3395.09
Uaca	1801.99	1604.58	1681.81	1815.99	1679.83	1683.78	1343.64	1602.88	1827.37	1552.26	1850.46	1589.88	1585.7	1670.23	1633.36	1337.13	1555.65	1669.01	2119.04	1593.95	1303.09	1360.96	1757.03	1701.2	1425.71	1595.4	1141.66	1119.77	901.548	1376.96
Sephs2	2015.66	1488.25	1756.23	1758.67	2129.66	1867.99	1104.88	2072.82	1145.87	1621.51	1636.53	1805.22	1297.21	1708.47	1547.82	1290.36	1628.29	1762.47	2800.33	2176.84	1916.88	1531.43	1351.09	1897.8	2140.61	1338.56	1987.89	1624.7	1883.54	1501.39
Ltbp4	39368.2	37847.2	40056.5	37228.5	33585.4	31828.9	37807.1	34195.8	43580.3	41966.3	34543.9	29560.9	37801.3	34882	22522.8	20397.6	30704.7	26226.2	22383.4	23979.3	20298	17721.9	31289.8	34467.2	18564.7	22611.4	28052.8	27993.8	33397.7	26451.4
Pdlim2	25570.2	24757.2	28221.5	27084.1	21705.9	22081.4	25590	26598.4	22866.5	22913.6	21255.6	25495.8	21339.3	22213.7	26782.8	26948.7	22436.7	27146.5	27913.9	30993.2	29075.9	25844.6	27786.6	31236.7	27019.9	26522.4	33698.4	32721.8	28490.9	37354.8
Jph2	NA	NA	102.377	NA	NA	NA	NA	NA	1338.37	665.322	372.868	538.109	400.004	498.717	357.108	351.305	674.173	814.43	NA	NA	2001.58	1924.85	482.904	NA	NA	NA	NA	681.308	NA	NA
Lsp1	7686.8	9484.24	10334	10607.1	13445.4	13188.8	9465	11266.9	11956.8	11787.5	10848.8	11002.2	9982.5	8810.71	2654.53	2748.76	10525.4	9578.62	9763.85	8820.82	8230.98	12831.8	39118.9	33032.2	17778.3	14434	13363.1	15671.7	18190.4	17234.2
Mecp2	7729.16	6519.51	7650.48	8136.95	7001.05	6741.89	7897.73	8389.92	7723.74	8048.23	7568.24	7326.92	8660.44	8871.57	8088.58	7494.34	13862.8	16334.4	6651.64	7978.04	9880.35	10114.4	11328.2	10980.9	11958	12077	11630.7	10088.7	10813	9419.05
Prx	16266.5	16483.1	21717.5	19033.6	26167.2	22822.1	34381.2	28890.7	26353.8	23061	20969.8	21955.1	26873.5	28100.9	15762.8	14234.7	54989.1	30900.4	29604.4	30656	21638.5	19943.3	17884.6	20129	13212.4	12113.6	20172.5	20318	27856.1	15752.5
Pgp	17595	15906.6	16445.5	14619.2	16167.7	17524.5	12764	12181.1	18454.9	17976.7	14103.9	12486.4	19463.9	15596.2	15658.8	12720.3	17825.3	18872.9	18535.4	17455.3	19410.3	20189.8	20097.9	20983	16518.7	15961.8	15138.2	13517.8	16250.2	14954.8
Krt71;Krt76	522.262	682.417	NA	NA	NA	NA	513.431	NA	NA	NA	NA	NA	NA	NA	2690.87	2983.99	5450.53	5358.79	10435.4	8650.68	7017.02	4331.21	11852.5	12845.9	25671.7	29096.4	14425.4	15307.6	6585.87	10600.3
Krt73	8037.25	NA	NA	9860.38	4600.72	8086	NA	10650.2	6603.88	6349.42	7494.23	NA	NA	6418.4	9824.4	NA	11124.1	9790.54	NA	NA	8294.95	9480.92	7550.01	7295.82	9798.03	9059.34	11663.3	9667.15	9671.66	7311.55
Krt6a;Krt6b;Krt75;Krt79	110460	106405	142492	106264	111863	87829.1	70177.1	71526.4	73015.3	66587.7	102395	73624.1	88498.2	58961.3	119036	104050	456052	447940	900743	763657	609826	602504	133157	108353	198449	210989	168112	133121	140927	168836
Krt81;Krt85;Krt86;Krt87	431471	514482	808010	755749	680236	600241	1194390	982954	1160380	1022640	509577	486655	568628	611802	613861	514093	783200	724452	711397	689539	928619	834636	336293	323003	555757	573728	553235	486127	577944	534469
Papss2	6452.13	5252.66	5879.35	6093.59	8152.11	8570.32	5211.8	5262.34	6765.12	6550.94	5905.56	5805.58	8553.81	8065.29	3218.21	4107.38	5545.16	6300.47	4369.31	4646.65	4978.56	5072.25	4499.66	4080.45	3371.1	2830.75	4722.93	4582.81	4093.51	4575.8
Krt8	125222	113016	65777.5	76896.1	72570.4	71946.9	50824.2	53947.2	91085.6	91805.5	66784.4	56968	152591	134729	45992.7	48341	105418	103449	48957.6	54338.7	5930.9	3754.64	161976	149212	96980	93410.9	77387.3	88603.7	95701.9	95960.4
Rai1	NA	559.72	NA	NA	391.383	271.345	NA	NA	NA	NA	756.753	350.804	NA	217.828	NA	NA	NA	312.171	NA	NA	NA	275.587	141.463	399.052	132.822	562.919	NA	NA	NA	NA
Flot1	7625.1	6395.16	6410.34	6858.8	8600.05	8788.44	6894.15	7002.63	8453.76	8123.47	7434.65	7480.54	9700.05	8751.68	5075.29	5653.7	8350.3	9278.54	5732.46	6329.54	7742.28	7406.92	7294.74	7314.03	6863.5	5626.14	7272.91	9010.67	6871.1	7234.94
Rps10	124976	117340	136215	113911	123751	127676	120037	127701	103146	106793	134781	119547	112018	99321.9	119488	98232.9	65614	59674.4	114644	132931	91213.6	86638.6	71521.3	79306.5	83826.6	68733.7	77645.2	65304.9	108703	102280
Pdxk	15190.4	16268.1	15862.6	14422.6	17933.3	20392.3	12987.1	14155.8	23037.2	20112.8	15348.7	15753.8	21891.1	21189.4	16513.5	14434.2	16004.1	16195.7	13070.5	13362.5	14289.3	13536.2	14877.5	13843.4	14134.5	13358	14430.7	17939.6	14462.3	19199.2
Wbp2	22664.2	17268.9	19317.6	19194.3	19233.5	17890	19933.3	18815	18596.3	18293.6	23593.8	22110.7	22983.6	22784.7	31425.8	34471.4	16933.6	17173.9	21122.9	17774.5	18420.4	18685.3	16313	20031.8	24197.3	21251.8	16752.4	17813.6	23240.6	24528.8
E2f4	817.436	428.797	763.982	617.706	683.189	895.974	726.906	423.758	441.246	654.584	332.072	680.585	815.505	360.883	605.036	NA	914.368	614.081	NA	NA	679.385	575.789	NA	583.304	NA	957.718	NA	361.208	292.808	909.652
Tbc1d15	7697.03	6309.69	7376.05	7636.82	7479.8	8040.18	7527.52	7565.66	7204.72	7485.28	7431.05	6326.28	8257.31	7421.4	4545.36	4692.9	6424.73	7183.5	6344.87	7170.64	8614.55	6568.45	7266.45	6727.59	8282.76	5703.81	7416.92	7229.19	6739.1	5612.36
Armc1	6126.27	8463.07	7116.83	8389.32	7037.46	8934.45	7767.15	8022.43	6344.44	7454.08	4664.28	5861.61	5689.21	7854.41	5791.76	5863.89	7479.81	8830.14	4596	4430.98	6936.67	7375.02	6719.75	6278.87	5600.04	5619.23	6720.15	6491.82	6283.25	7973.35
Anapc5	3408.15	2757.25	2820.62	2118.04	2801.82	2528.49	2450.38	2091.62	2696.19	2483.56	2538.62	2618.55	2841.39	3221.59	2701.73	3106.32	1829	2011.33	1700.7	2307.46	2160.72	1799.38	2947.69	2285.54	2965.92	2927.9	2580.59	2268.85	1424.07	2338.82
Ncf4	1184.48	2009.68	1761.45	1906.76	2745.26	2374.74	1521.6	1710.5	2249.64	1487.39	1762.29	996.155	1937.5	1776.21	1132.35	878.993	2450.81	2642.49	2367.73	3078.97	3710.86	2668.79	2171.87	3234.82	1302.95	1754.32	2436.46	1707.87	1723.21	1844.26
Cdk16	NA	NA	511.296	NA	500.578	NA	NA	NA	175.31	NA	NA	NA	NA	NA	NA	541.221	NA	NA	NA	NA	NA	NA	NA	NA	NA	NA	911.045	782.112	NA	NA
Mmp3	703.782	1047.37	967.546	658.198	764.52	542.408	958.982	NA	697.138	894.932	196.704	657.487	581.038	1086.09	336.468	584.027	1057.23	751.021	NA	1086.56	975.802	1254.63	NA	329.715	NA	NA	NA	NA	NA	NA
Washc2	2572.89	2562.81	2200.74	2529.95	3075.82	3777.62	1894.12	2898.92	2270.02	3081.63	2862.01	2575.17	2737.69	2991.13	1659.4	1527.18	3985.33	2936.57	3126.89	2856.6	2961.48	2927.61	3382.52	4099.66	2597.77	3511.7	2332.91	2471.76	2672.96	2122.74
Spats2	2180.84	1845.4	1543.69	1911.92	1765.13	2290.32	1743.66	1815.84	1746.5	1490.4	1240.02	1473.02	1818.05	2079.08	676.283	908.88	776.98	1109.51	1296.27	1131.73	1618.58	1653.27	1732.65	1211.55	1172.66	923.346	1310.22	1322.48	1240.26	1432.71
Mcat	1145.06	1353.7	1047.78	1367.52	899.349	941.363	1203.96	1380.64	1405.69	673	1630.74	1422.15	1194.97	1318.92	2676.45	2235.09	1495.14	1450.47	1991.27	1411.31	1142.31	1363.73	1265.02	1269.87	1064.88	1270.9	1382.38	1816.45	2137.07	1755.54
Ano8	99.1311	NA	545.298	538.823	405.22	281.735	234.753	302.793	660.713	430.234	NA	NA	NA	517.297	200.376	NA	NA	NA	NA	NA	NA	NA	NA	NA	NA	NA	947.819	NA	NA	NA
Ppie	8658.85	9700.25	7599.29	7866.75	6967	7822.06	6908.57	8693.04	8313.26	8282.95	9056.64	6730.2	7052.01	7178.54	7826.99	5204.81	6735.3	10909	8271.09	8123.51	9761.22	10100.7	9020.02	7221.26	8310.7	7347.25	7834.52	5931.25	7083.17	9378.42
Got2	115122	115465	113444	114634	115176	114030	101055	99216.1	109650	113735	108896	107082	117596	116461	129785	121048	120880	125013	128919	134244	170944	188037	99768.9	110507	124363	122327	125179	123642	120397	117328
Tars2	4790.32	3356.85	4003.7	3770.24	4108.93	3485.2	4114.83	3943.37	3612.14	3891.69	4005.75	4265.71	3909.88	3581.51	5218.2	5720.03	4888.35	3972.05	4393.19	3772.36	4378.66	4936.1	3604.92	4035.91	4295.68	4053.48	4760.04	4671.5	3886.66	3046.48
Usp8	3120.89	3110.06	3490.39	3130.64	3534.38	3684.51	2818.28	2913.55	3040.15	2871.39	2962.42	3149.43	2783.71	3173.63	2612.26	2503.19	2502.85	2336.71	2463.56	2711.32	2840.31	2657.16	2701.2	2583.82	2782.41	2841.56	2688.74	2839.16	2615.98	2380.99
Rnf126	8970.29	9790.38	7595.36	8967.89	9806.71	9315.46	8649.9	10163.1	10978.8	9849.33	4412.2	8943.93	7650.33	7812.05	8148.03	6410.39	8714.2	9474.07	NA	8719.37	7548.43	8303.02	12251	13428.8	8318.23	7142.93	6050.53	10009.8	9881.97	8363.54
Chmp2a	27890.9	29856.1	30590.8	30405.3	31007.8	29799.4	32239.4	32061	28634.4	27857.1	29998.9	30589.6	29107.4	29660.9	30557.1	30323.4	28799.4	28305.2	25841.7	25627.9	33514.6	32704.6	29768	28855.8	34530.2	31699.5	27615.5	25830.9	30736.7	33762.1
C8g	4551.94	2740.53	5200	4600.56	5575.43	5491.23	1324.74	1150.62	1686.27	1940.33	1445.94	1666.75	2179.12	1916.98	2737.73	1751.08	6562.95	7286.79	8026.16	7411.17	8438.22	6790.53	NA	NA	NA	NA	NA	1120.36	477.703	1002.11
Bbox1	14049.9	14816.1	14605.2	15549	13895.1	17309.9	17544.3	18804.8	15012.8	14611.3	15792.8	16505.7	13992.5	15043.6	19581.4	21002.6	15874.5	17464.3	13539.7	13846.7	19521.9	20117.5	26817.8	25173.1	20932.7	22060.5	17397.3	20043.6	18868.7	19653
Lacc1	NA	NA	677.425	429.136	150.29	239.453	376.275	192.71	230.722	NA	424.042	NA	NA	219.614	NA	282.771	NA	390.129	473.718	NA	NA	NA	NA	NA	NA	52.4524	179.426	NA	149.563	579.832
Ppp1r9b	17113.4	16747	18594.1	20575.2	13735.7	19487.2	19226.2	15140.8	17635.6	17602.4	14267.1	17132.3	15286.2	18222.7	10347.1	11081.2	16916.1	20108.3	12675.4	18874.1	14501.6	11843.1	20994.7	25586.8	18315.8	17078.4	14940.9	15838	16556.5	18675.8
Vdac2	78831.8	84519.4	76461.1	81599.6	68424.3	74406.7	74832.6	75157.5	84869.3	82449.1	87679.6	82741.3	76896.3	85150	102966	82656.3	78897.9	75308	88980.9	89244.1	102177	100578	72706.2	71074.8	77150.7	79774.6	76615.1	87179.4	86172.8	79487.9
Hnrnpul1	12241	11558.2	9902.78	12129.2	11330.9	12381.6	11511.1	12984	12955.7	13373.7	11135.7	10684.5	10749.8	12145.4	8785.61	8723.19	10612.2	10967	9712.19	10494.4	10375.5	12014.9	11455.2	11625.8	12770.7	12077.9	13189.9	14018.2	11476.5	11310.7
Nid1	37614.1	39946.3	39085.5	41456.7	35387	35293.5	38508.2	38686.3	39992.1	39708	38819.2	40578.2	40930.4	44420.4	35064.8	38689.4	48780.9	47169.6	35903.8	39800.1	46029.6	47204.8	29604.5	30615.1	28852.5	28235.8	33784.7	34211.6	29985.6	30685.4
Me1	48862.2	48777.3	47241.9	50160.4	46399.1	49486.4	56085.1	56697.6	56953	59964.8	52835.6	47265.5	64227.9	59444.9	36043.7	39022.5	46391.3	49893.9	64324.1	65917.5	57712	58012	42609.3	43519.9	47020.8	50692.5	55034	57875.1	51949.6	53924.7
Sepsecs	2081.53	1521.2	1689.65	1565.08	1555.1	1352.06	1816.08	1386.63	1792.86	1417.31	2403.8	1963.36	1770.81	1620.41	1691.77	2239.07	866.377	1399.56	1023.92	1527.19	1881.87	1432.56	1127.64	1240.83	1476.94	1966.82	1414.99	1561.28	1574.93	1601.64
Rbm4;Rbm4b	1982.36	2220.09	2687.82	1884.46	1838.86	1874.14	1819.67	1972	1960.17	1916.36	1570.98	1960.08	1925.86	1920.62	2273.21	2098.11	1761.83	2080.61	1917.84	2038.94	2116.79	1958.29	2430.41	1537.12	2421.36	2337.03	2460.76	2084.71	2257.18	1957.12
Cluh	8954.94	7392.71	9121.69	9010.47	7255.89	7622.47	8186.44	8045.35	8814.7	7735.92	8680.16	8853.11	7824.17	7347.88	8687.29	7701.94	8654.21	8448.23	9926.2	9510.54	8919.74	8740.59	7831.34	7764.76	9021.66	8819.87	9328.1	8866.5	7482.76	7806.38
Nomo1	11228.7	12277	11889.4	12818.7	11287.1	11193.9	10955.9	12472.6	11903.7	11346.6	9618.71	9961.31	10447.7	10395.9	7764.44	6571.1	11936.8	10823.3	11410.4	10647	12174.8	11650	9827.16	11015.7	9882.36	9702.04	11524	11765	10745.7	11163.9
Pard3	4970.86	4730.66	5099.16	5162.64	4344.58	4523.03	4898.73	4354.97	4424.9	4622.22	4983.47	4658.89	5324.92	3903.87	5230.49	4323.79	4227.67	4230.89	4826.89	4985.31	5256.41	4178.81	4161.72	3939.34	5733.92	5435.15	5759.39	5593.34	4786.41	4829.27
Myh1;Myh3;Myh4;Myh8	1024.05	1487.19	2649.53	2512.12	3142.93	638.632	10693.2	10595.6	157247	175559	274038	257306	217699	196728	165198	160770	265406	277417	198617	217612	1465750	1913450	2665.01	3300.4	92025.8	87640.1	7643.66	7315.55	5576.3	2477.34
Myh1;Myh4;Myh8	1006.41	1309.6	4638.05	2442.71	8087.58	NA	9681.57	4565.24	82851.2	105819	166186	139018	110624	94294.6	82568.1	104524	188963	188209	137165	118405	877038	794400	2961.01	5304.33	55594.8	52915	7645.65	6079.58	18723.4	4115.53
Cp	21429.2	20631.7	19009.9	19516.3	34105.9	31774.2	24333	23216.9	28969.5	25800.5	24697.9	25435.4	31550.3	31529.2	18049.7	15405.2	27051.1	25887	23613.4	24527.3	24397.2	23675.3	26813.7	29454.1	27060.1	26943.9	34297.6	30093.3	30265.8	28580.4
Luzp1	2826.13	2578.76	3124.49	3090.85	2707.83	2618.48	2958.79	3322.73	3234.37	3283.01	3027.72	3254.88	3248.24	2978.18	1964.69	2014.31	3707.2	3577.33	2842.52	3205.47	3033.7	2574.58	3062.58	3092.95	3573.61	3114.08	3647.55	3078.87	2963.81	3431.02
Grhl2	2031.97	1746.76	1513.98	1907	1752.55	1959.63	1429.09	2018.44	1480.5	1718.44	2115.73	2024.54	2009.36	2053.87	1858.98	2376.38	2248.46	2165.16	1966.65	2098.49	1995.04	2068.2	1884.53	1754.77	2738.88	2429.15	1591.97	1525.48	2027.18	1665
Tbca	7020.19	9482.75	4795.65	7009.37	9898.66	9768.01	5511.54	6601.76	7087.95	9211.29	7403.19	6739.6	5936.64	6313.64	5281.5	5148.16	5111.12	4241.7	5663.89	6387.43	4077.54	4772.1	6690.19	5183.12	3826.52	4647.31	2484.41	2305.02	7772.87	6903.08
Anxa2	754175	779603	840445	806385	797574	775866	795733	740751	803221	727925	747557	664529	732834	709937	622724	582999	1125320	1029950	907176	1030560	916418	876694	1030650	956540	856026	897695	938730	879469	933306	836294
Ado	5329.5	4199.85	5564.32	5072.84	4829.53	4481.76	6384.33	4554.25	4967.68	4872.28	4181.87	5427.08	6263.75	5751.12	4163.69	5725.88	5964.24	4255.33	4004.28	6069.29	6985.15	6030.21	6929.95	6631.36	6995.8	5327.21	4149.16	4352.02	4930.25	4760.67
Esyt1	20616.8	23648.5	23873.2	24908.4	26153.9	27485.3	23298.7	23493.9	24293.7	25729.3	22316.7	23577.1	25390	24232.8	19848	18828.1	29603.4	27792.5	20856.8	20300	23814.3	23587.1	32497.8	35099	24008.1	23367	29842.6	29620	29043.4	28007.5
Dysf	2437.15	2229.73	2750.09	2346.52	2343.23	2357.21	2071.43	2240.3	2597.27	3043.91	2456.89	2593.87	2537.03	2620.45	2969.19	2130.91	3511.84	4378.31	2375.5	2614.3	6973.28	6128.47	1762.01	1738.48	2365.65	3032.14	2753.96	3136.96	2032.85	1707.88
Pcna	38491	36553.7	35328	35288.2	33175	35305.3	39049.6	36784.5	35604.1	36761.6	38018.3	39614.9	35898.2	32725.7	40176.8	38321	31907	34170	41254.2	39383.7	32612.4	30939.2	45019.9	40831.4	42530.3	40616.9	39397.9	38354.2	39807.9	43147.8
Kank3	1715.28	2459.47	3520.82	4152.4	3344.62	3054.44	2733.57	3474.55	1938.18	2764.07	3016.73	3934.82	1020.79	3421.63	1986.27	2237.77	2632.35	3177.89	NA	NA	1065.14	NA	681.359	2256.91	3109.15	2703.35	1693.96	3510.33	1612.13	2195.73
Rasal1	918.709	1214.17	1039.57	662.352	1377.19	754.959	899.424	1298.9	1248.38	796.158	1012.44	773.187	937.905	789.668	2455.62	1101.27	1014.9	NA	NA	2256.69	541.333	951.505	681.363	881.344	1178.21	931.215	1414.79	1117.42	2016.99	947.681
Hook3	8831.93	8057.23	8743.68	8621.45	8101.4	9863.79	8450.54	8333.17	8283.25	7935.28	6901.28	6473.25	8190.75	8084.97	5160.04	4268.52	6332.58	5819.01	4888.18	5231.84	6455.02	5748.19	7707.94	7132.1	6847.41	6416.4	5140.31	5279.39	6170.82	6962
Nt5dc1	4114.26	3501.68	3548.19	3187.49	2802.4	3588.85	2751.89	3472.8	3479.6	3228.12	2933.47	3313.13	3659.09	3863.68	2659.33	3380.01	3565.47	3691.79	2285.68	3802.35	3277.6	3307.86	4505.82	3933.98	4170.89	4226.38	2823.61	4416.64	2760.3	4127.91
Eps8l2	20831.9	19904.3	21357.8	22019.1	19766.6	17895.9	19439.1	19842	16128.2	17318.6	20701.1	19606.6	16581.9	16141.9	22556.6	19022	19471.7	19112.6	23134.3	22567	19476.3	19489.4	21165.8	18373.4	22155.3	21941.2	19962.8	18132.2	24686	22267.3
Churc1	2003.83	1300.02	1929.05	1365.71	1268.39	1383.24	924.4	1086.87	1383.73	NA	1057.34	1030.72	1767.33	1415.49	658.206	NA	2607.13	2418.61	1620.88	1526.14	1580.92	1866.34	3419.75	3155.94	1820.65	1959.89	1500.96	1663.84	1166.9	1765.47
Hp1bp3	64554.3	64949.4	56576.8	63908.7	60681.5	63290	65438.8	68621.2	64387	68787.9	66411.1	76098.8	59630.2	70860	73556.6	68530.5	59292.9	58642.5	52541.5	53279.6	57814.6	58857.8	57626.4	61760.7	70571.1	65815.6	62213.2	64931	61912.6	62575.1
Hsph1	10559.6	8990.46	10894.9	10646.9	9371.42	9412.18	9526.23	9705.24	9128.59	8426.46	10405.4	8406.63	7955.33	8709.16	7599.12	5865.39	7874.12	7985.19	9323.53	8816.56	8083.37	8214.93	8807.71	8216.85	8681.54	8428.62	9985.57	10487.9	9715.06	8599.73
Chid1	736.689	778.175	518.134	430.436	989.815	758.217	598.092	1083.74	713.926	571.136	1407.97	761.099	491.475	987.11	1914.12	2105.98	664.261	574.253	128.886	291.102	586.161	886.909	768.071	243.406	591.263	478.635	983.124	988.139	1210.79	769.795
Rock2	6656.34	6480.66	6582.21	6966.31	7222.36	7427.27	5812.02	5681.65	6435.29	6320.04	4722.98	5094.36	5874.15	6101.18	3739.81	3772.81	7272.05	7017.28	5696.78	5633.24	5606.75	5536.65	5969.3	6473.26	5510.32	5173.51	5916.66	6479.97	5541.06	5441.69
Bspry	1510.75	1825.52	1669.14	2329.08	1386.68	1268.76	1375.58	1891.79	1826.86	1494.63	2332.42	2055.74	1658.35	1784.46	1995.6	1889.79	935.27	1285.81	NA	1204.09	1809.14	1654.94	2060.84	1300.93	2695.64	2631.81	3737.09	2634.76	2031.63	1369.3
Mtmr3	1917.22	1468.26	1381.36	1551.69	1592.84	1537.46	1706.51	1390.15	1484.55	1423.2	1297.31	1210.9	1323.63	1482.15	1304.57	893.089	1956.14	1192.03	1199.72	1086.75	1066.25	1346.07	2080.63	1796.99	1072.5	1442.55	1417.26	1286.35	1755.16	1862.98
Cd109	40407	44778.3	43943.5	43958.2	37138.8	39691.5	41454.5	45188.8	38680.3	42246.8	39806.3	39914.7	36415.3	39621	38718	36260.6	39164.8	43276.3	45801.4	46187.9	43997.8	46168.3	35517.3	36744.1	39336.4	36027.1	44871.3	46460.2	43721.3	45086.4
Arhgap45	1380.08	1408.17	1418.78	1376.84	1665.35	2155.49	1367.38	1346.95	1566.65	1374.34	1310.49	1235.85	1860.7	1819.03	1127.36	815.577	1211.61	1354.16	1760.84	1863.18	2233.73	1444.77	2670.92	2152.32	1617.84	1693.63	1797.17	1181.36	1725.62	1582.76
Epb41l3	8972.97	7701.84	8425.75	8177.02	8631.87	8336.71	9920.5	8842.88	9234.68	9566.37	8616.52	8259.43	10788.4	10107.1	4870.87	4942.17	11369.7	11298.2	6786.69	8077.18	8526.45	8653.3	9662.81	9515.03	8527.18	9306.42	9967.74	9096.56	8221.67	8117.88
Lama2	11830.8	11875.8	13539.1	13749.7	11431.5	10819.6	12494.5	12077.1	13448.2	13304.6	12570.7	12820.7	14799	14954.4	9513.25	7651.82	16586	15331.6	11966.2	12681.6	18650.9	18348.4	8913.99	8279.56	9109.29	9147.64	10016.4	9537.77	9018.48	8326.45
Canx	60359.4	62172.4	61577.5	62804.1	58350.5	63575.6	60756.1	67265.6	65011.1	62091.1	50015.6	55366.1	56809.9	56415.9	46683.2	41156.7	59704.6	57726.1	65792.8	61706.8	62537	63636.4	68045	67146	62455.1	61243.9	60652.8	64655.7	63459.8	66209.5
Pald1	1682.54	1767.69	1810.4	2169.68	2287.7	2294.07	1991.96	1852.32	2619.92	2580	2143.39	2126.49	2702.05	3014.51	1179.52	1176.32	1966.99	2031.68	1368.19	1474.51	1247.21	1586.64	1654.07	1563.43	934.053	1340.61	1612.12	1749.3	1620.76	1538.44
Fbln2	20518	18315.9	20266.6	18914.9	17232.6	15827.8	16634.6	13818.5	17948.8	16546.4	14370.5	14031.8	15476.8	12938.3	11025.4	8850.93	15232.5	15034.1	11946.1	12216.8	10428.5	10858.6	17431.5	15193.7	13963	13160.9	17727.2	16862	15758.8	15168.9
Dbnl	29612.3	28619.6	32534.3	32760.4	30883.9	32850.2	34396.7	32389.7	30027.2	33477.8	33004.7	30783.2	29939.6	32109.5	26785.1	24880.9	33311	33608.7	31017.4	38255.8	31075.2	30763.2	36880.2	33851.9	31135.7	33162.1	34309.4	32026.5	40388.6	38554.6
Lmod1	2104.34	1314.21	1911.41	2458.14	1962.62	2225.76	1869.16	1313.62	2014.46	2430.67	1956.23	1663.03	2674.01	3033.68	3188.23	3659.14	3852.6	3890.23	2312.81	1277.44	2632.38	1915.4	2441.98	2736.24	2022.79	1699.93	1171.88	2122.56	2452.6	2684.06
Atp6v1e1;Atp6v1e2	23451.8	21236.2	22007.5	26282	20896.2	23677.5	17539	20117.9	14301.9	21335.8	16828.3	21798.7	20421	23054.7	25003.9	23821.9	36187.3	40451.4	41127.2	33912.6	19470.4	21461.8	44673.7	55426.7	30992	35440.6	21962.6	26583.6	42847.3	30549.8
Cdc37l1	NA	1712.49	1160.34	1851.15	809.525	1897.82	1437.57	1457.88	1510.46	1461.14	2523.73	1465.12	1708.83	1187.33	388.064	NA	1209.09	NA	1745.58	NA	NA	1774.65	NA	NA	NA	NA	NA	NA	1942.93	1467.15
Smc3	13012.6	12951.6	12777.9	13671.8	11518	12114.6	13405.8	13075.4	12849.8	13038.2	12078	12001.7	12312.8	11608.1	10456.9	10032.5	13372.1	13879.3	11123.9	11501.5	11892	11555.1	12473.2	13563.1	15013.5	14218.5	12085.7	13426.9	12398.6	12301.8
Filip1l	2414.83	2470.73	2397.63	2758.03	2904.06	2797.69	2178.84	2402.91	2420.03	3399.07	2338.6	2509.93	2379.14	3944.79	2009.52	2278.08	2513.87	2626.43	2006.03	2104.25	3059.15	2482.43	2142.5	2304.98	1595.73	1631.17	2472.33	2205.75	2398.48	2672.48
Dsp	834307	868037	914283	916380	706089	727804	809948	792088	695167	697919	756881	734723	633350	644388	768314	741230	727288	748825	1111830	1109080	904551	899253	830276	802411	879785	838891	994921	957760	991658	970935
Tdp2	586.587	1028.56	667.581	902.385	735.354	631.535	905.164	900.51	577.633	362.073	997.396	809.549	1093.44	865.009	593.965	395.33	1039.94	1103.53	1359.05	1387.8	823.396	1138.6	1253.9	994.105	1635.69	1121.63	895.409	1265.36	1268.21	980.259
Rps12	100216	100398	111334	141701	116994	102913	103708	107306	116214	117739	99695.7	97688.6	94426.4	87462.7	92794.9	76294.4	90937.6	88308.5	170083	202006	95252.2	98627.8	123132	112363	113813	86417.1	102670	112580	124400	139696
Sfr1	3770.56	3267.15	2771.88	2185.74	2539.2	3566.89	2290.76	3400.6	3443.7	3085.27	2568.58	3257.05	2724.07	3027.74	2045.64	1801.23	4526.38	4811.26	2932.19	2630.46	3361.54	2801.87	4422.87	4223.75	5195.59	4675.95	2343.57	2256.39	4237.35	3075.67
Lrpap1	11603	10824.9	12608	12574.2	13249.4	13072.4	11721.6	11712.7	13298.6	13393.7	11622.3	11675.6	14281.4	10856.5	6806.21	7451.02	12467.2	12912.4	7155.38	6932.83	11585	10278.6	11015.8	11064	8980.44	9493.35	6680.97	7433.4	9548.95	9354.47
Nudcd1	8400.38	7709.24	9272.36	8708.92	7053.3	7623.55	8454.06	7945.53	8253.28	7233.56	7517.75	7962.44	8942.32	8786.24	6620.64	6221.95	9596.93	7768.21	8760.08	8958.34	8916.28	8468.9	9814.54	8538.94	8002.38	7693.41	8389.17	8880.2	8554.58	8167.06
Tbce	3478.97	3830.64	4283.95	3914.49	4801.53	4457.5	3861.22	4406.63	4771.88	4724.86	4437.27	4623.21	4750.96	4571.59	3762.62	4857.61	5108.24	4380.72	5030.79	4535.51	4166.09	5222.13	5046.35	5247.18	7425.21	4562.91	3773.64	5296.34	3831.83	5003.49
Rpl11	151149	163032	143508	154148	130406	140397	149062	150908	110558	137785	112256	153553	67380.1	125485	187767	204291	135109	134070	181757	180860	135086	178319	131117	147852	178537	156676	146378	147055	159137	146178
Rhot2	3078.21	2067.95	3455.15	2386.24	2684.87	2456.73	3049.81	2938.51	2130.17	3035.93	2837.63	2884.21	2729.34	2585.82	2470.46	2354.15	3524.03	3703.19	3045.4	2321.71	3407.5	3452.59	2666.51	4239.35	2972.92	2304.47	2460.95	2940.65	3079.4	2442.1
Rhot1	8127.29	7400.23	6957.04	5238.26	5512.73	5490.8	5875.3	4610.06	5180.12	4198.93	9289.19	6674.88	6494.23	5930.56	6716.15	6605.05	5460.25	5135.07	4914.43	5473.66	7567.06	6580.66	6671.79	4771.7	7730.28	6827.02	6280.23	5863.2	6250.98	6381.64
Aars1	32637.1	30456	32032.4	32156.7	34694.4	35885.7	26854	28697.7	31288.8	30171.6	24003.7	24677.7	31520.6	31878.4	19219.1	17646.2	29889.8	30451	31393.6	30081.2	28685.7	27886.4	26498.8	27755.1	26669.2	24024.7	29078.4	28754.1	27324.8	27747.7
Ubtf	15977.6	15575.1	15168.9	16802.1	16693.6	14166.2	18440.2	16682.3	15589.8	14733.8	13940.3	14437.7	16305.5	13504.9	11621.5	11540.3	15418.5	16285.8	14621.4	15278.1	15461.5	14948	14887.2	12828.9	17857.8	15572.8	15738	14590.7	14301.1	13269.3
Vipas39	3515.33	3791.73	4333.56	3556.11	3472.21	3464.96	4413.13	4167.93	3633.75	4037.84	3570.66	3953.27	4042.58	4901.98	3987.18	3509.21	3195.63	3561.58	2240.31	3145.31	3937.03	3852.84	3726.83	3711.44	3928.77	4150.31	4246.46	4848.43	3456.29	3961.19
Setd3	9867.56	10435.6	10786.4	11306.7	9336.21	9940.59	9826.58	10297.4	10682.2	9779.65	10012.9	9967.67	9502.75	10456.5	8881.23	8544.63	9931.14	8010.26	9015.63	8669.61	10143.9	10687	8494.42	8833.19	9329.31	9680.03	10718.2	10031.3	8859.14	8347.77
Acaa1a	49692	52170.6	57748.8	57592	54132	59302.6	53068.9	56268.1	50328.4	58345.2	52285.9	56604	54666.2	48907.4	28686.2	32755.9	50581.8	50597.5	51054.8	52315.9	54833.4	51562.6	47980.9	47340.5	52480.9	50133.8	51250.8	47049.9	51246.1	50936.2
Numa1	19255.8	17373.6	18750.1	17985.3	18498.4	17944.4	17392.9	17207	18382.4	18583.6	17269.8	15529.4	16531.7	16634.3	9501.82	8650.77	14301.3	15022.7	14138.9	14644.1	13142.9	11953.3	17339.8	14712.1	15308.9	13466.5	14582.1	14649.5	13832.6	12893.8
Rcn2	2167.54	2325.23	3314.96	1923.45	3678.69	3128.67	1776.36	2319.66	2901.14	3022.39	1817.54	1291.83	4124.59	3320.74	1843.39	1450.28	5299.89	5100.34	3459.31	3753.88	2797.04	1673.74	5505.2	4126.15	3241.38	3930.07	3115.19	2230.45	2478.18	3334.79
Dnm1l	21722.9	21721.2	23428.5	21864.5	20860.3	21747.2	18946.6	21903.6	20964.4	21469.1	22192.7	19963.3	21069.1	21684.1	16444	16906.7	19170.8	19955.1	17608.4	18546.5	20245.1	21798.6	20578.3	19701.7	19568.1	19373.2	20224.8	19528.5	21315.6	20352.5
Npl	3063.34	3112.42	4222.07	4107.66	5020.87	5101.72	4659.48	4695.05	8290.02	7029.52	4257.96	5252.2	9390.16	8535.94	3102.03	2872.64	3175.79	3222.7	2937.34	3174.53	3807.28	3852.08	2810.07	2454.1	1718.21	1887.74	1300.8	1447.19	2273.38	2541.26
Tgm2	11972.1	10873.7	12967.5	12519.7	11889	12907	11945.5	11899.2	15283.4	15615.9	14174.8	14479.4	18352	17024.5	15382.3	14523.3	28229.4	27801.7	13791.4	14098.8	20082.4	19486.7	18497.9	16146	12164.6	12136.3	17440.8	16979.1	15751.3	15787.8
Ppfibp2	3672.97	3110.73	3506.49	3048.38	3090.57	3016.57	2928.42	3027.37	2494.81	2999.6	2869.88	2409.89	2753.31	2720.33	2020.24	2275.38	2667.17	2776.32	2593.86	2982.24	2993.8	2783.05	2204.77	2677.64	3542.61	3463.58	2940.09	3092.1	3313.27	3099.41
Sdr16c6	31565.8	29375.1	34473.7	36000.7	32569.1	36343	31668.8	34715.3	29071.5	32049.2	29611.4	29139.1	23772.1	28145.2	25457	20989.9	30068.2	37313.4	36399.8	33426	32621.8	31742.9	10775.9	13580.5	28169.4	24334.6	22612.3	26965.1	23116.2	26407.8
Rmdn3	4125.79	3794.89	4673.78	4211.42	4178.35	3507.76	4387	4441.65	4918.96	4327.89	3841.16	4372.13	3797.23	3499.94	2323.81	3209.55	5035.03	4976.63	3627.49	3604.09	3998.34	2980.29	4150.17	4131.26	5410.1	4390.83	4636.21	3836.73	3781.86	4559.33
Sarg	6001.16	5040.12	5659.39	5278.69	5970.91	4955.57	4705.41	4157.46	4928.58	5265.08	4177.29	4798.31	4840.69	4871.87	3197.01	3199.09	4946.05	4406.77	5217.52	5595.85	3881.21	3663.01	5411.23	5185.07	4675.41	5004.75	3755.07	4063.7	5547.39	5907.53
Rbck1	1437.85	1118.88	1499.42	1225.23	1366.53	1514.27	1376.24	1213.88	1524.16	1297.2	1182.47	1442.51	1684.92	1519.16	1079.6	559.117	1557.92	1468.87	1163.13	1565	1668.28	1363.94	2160	1783.06	1863.69	1772.31	1538.92	1320.26	1335.85	1398.05
Thrap3	24137.2	20581.7	22536.2	22527.5	20629.9	20793.3	24341.7	19685.3	21932.5	20407.4	18131.9	18302.5	18960	21798.8	23221.7	18488.8	32169.2	30334.8	24326.3	22595.2	24282.9	19163.8	24975.5	27741	34879.8	33081.5	29759.1	26192.1	27255.1	25655.7
Dab2	23022.1	21751.3	20568.9	21225.1	31673.1	33204.9	20191.8	19281.4	25813.7	24769.7	18998.4	18854.2	23448.8	20954.1	14353.3	11116.8	23965.6	26974.2	19319.4	21054.8	21339.2	21503.1	17972.3	19753.5	15264.6	14504.8	20461.1	18867.5	19651.2	20922.3
Ogfod1	768.54	1049.31	875.482	527.929	1089.49	725.033	567.078	1019.93	954.979	653.947	993.651	1141.03	973.994	534.916	1095.86	954.207	817.498	960.887	568.62	927.645	1015.91	1102.85	NA	711.073	973.494	1253.18	460.806	422.798	879.924	NA
Tmpo	61336.4	55473.7	56804.1	56121.8	52221.7	48108	56566.6	55028.6	52568.3	52964	53222	50023.5	51509.7	48092	44943.5	39887.2	63850.5	60475.7	63032.5	62370.3	56363.7	56295.1	62353.1	58457.1	65727.9	70861.9	58122.9	53004.1	61186.1	60515.3
Nkap	695.505	350.113	1007.62	537.779	1727.65	413.255	1113.57	1534.26	891.706	729.533	NA	514.673	NA	814.56	839.845	NA	981.359	1095.59	513.771	1385.92	1157.67	639.013	1337.67	1251.8	1784.98	772.45	1765.6	1100.04	726.429	1331.46
Ncf2	2105.4	1874.45	1842.09	1849.58	2406.28	2687.96	1465.31	2029.54	1583.23	1791.73	1716.96	1561.69	2119.86	2012.47	1440.63	1554.59	3314.83	2339.16	2917.24	3373.72	2894.67	3329.38	2448.98	3435.1	2055.62	1991.51	1188.48	1701.39	1747.29	2054.63
Mprip	6131	4801.41	6092.46	5326.24	5683.23	4721.77	5909.6	4917.88	5365.34	4724.59	5336.75	4215.36	5508.97	5540.56	3661.61	3304.39	6653.77	6104.31	5280.62	5370.77	5594.75	4528.65	5663.85	6323.63	6334.54	5792.97	5916.55	4927.56	5499.46	5321.6
Clic1	98843.2	108921	111517	115837	122973	124753	101016	112955	124416	120536	102202	95255.4	93837.2	111350	88273.2	91119.5	103021	107867	102726	115820	106737	109317	119478	122951	101576	109242	102720	109153	135735	138231
Vat1l	1500.49	1429.24	1860.77	1971.27	1910.29	2269.25	1988.09	2325.39	1967.25	2956.66	2340.93	3285.04	3603.1	4925.15	1775.71	1783.27	3137.53	3310.89	1780.86	1830.89	2587.83	2496.56	1515.55	1777.51	1096.89	1417.09	1824.75	2086.3	1963.67	1493.81
Plxnb2	11054.1	9741.54	11298	10303	10643.4	10862.2	10029.7	10400.7	10917.9	10961.3	10487.8	9271.67	10254.3	10830.4	7806.91	6970.3	10374.9	10160.9	9717.08	9254.14	10955.6	10582.1	10095.6	11406.5	9711.72	10030.6	10731.3	11068.5	10240.7	10306
Nasp	19009.5	18241.4	19349.7	19041.9	20169.2	20588	19839.9	19768.8	18890.7	18891.7	15468.3	17747.6	14924.5	19334.4	17362.9	17020.1	21135.8	21750.2	23022.2	21107.4	16394	15805.7	21341	23602.4	22581.2	20465.6	15057.7	18133.1	23164.7	21856.3
Wdr62	1557.97	1302.31	1968.17	1301.14	1696.59	1563.81	1548.19	1160.62	1303.28	1822.51	1457.93	1327.96	1369.85	1382.76	752.208	848.98	984.084	1061.63	1100.21	1426.64	1444.62	1043.29	1679.21	1375.5	2140.26	1528.78	1396.01	1095.19	1854.07	2025.04
Bop1	5610.64	5124.49	5723.11	5197.99	4726.17	4823.81	5209.49	5433.26	4646.86	4268.12	4805.14	5019.5	4707.54	4570.21	3832.74	2954.93	5623.83	5200.75	5550.76	5647.03	5763.11	5121.62	5428.11	5128.72	4835.49	5337.21	5344.8	5540.37	4663.68	4397.64
Ces1c	54028.4	56453.2	50660.5	49300.4	96710.9	87410.4	79193.9	78586	109145	103552	90891.8	91302.3	124437	129181	40840.1	37759.6	58684.1	48666.8	49114.1	52408.1	36907.1	44321.2	118525	121707	90064.4	95065.5	110028	103741	107507	100336
Top1	17056.7	16502.9	15992.9	16134.8	13603	14004	16281.1	16906.8	14783.6	14637.8	14712.4	16285.7	13213.5	15805.3	14904.1	17094.2	14454.4	14571.6	13080.9	13279.2	16217.8	18009.2	11950.7	13110.4	16221.4	16168.9	13315	15885.5	12972.3	13145.1
Rmdn1	3880.12	4169.76	4417.35	4050.07	4517.78	3975.98	4049.07	4977.56	4217.92	5210.08	4095.96	4516.51	5266.08	5105.68	3112.18	2742.79	2988.95	3250.37	2057.58	3784.64	2817.72	3240.88	1997.24	3549.05	2201.38	3147.55	2782.11	3829.87	3668.99	3351.2
Nt5c3b	7100.48	8086.54	6668.11	7938.95	6206.02	8854.12	7775.9	7307.47	7406.15	8627.06	7378.32	7845.87	8951.99	9901.55	5618.26	7062.26	7648.46	7913.3	7129.66	7764.91	7126.61	6626.74	8404	8541.36	9550.22	7901.2	5011.8	6230.65	6313.07	7932.14
Nck1	4123.17	3443.14	4430.77	4223.39	4133.88	4245.91	4384.53	4717.87	4351.23	4117.02	4441.09	3951.9	3980.54	4577.59	5281.54	3711.87	4321.61	4025.95	4218.98	4587.44	3882.43	4063.26	4035.89	4685.68	4778.17	4744.46	3981.26	4066.95	4208.58	4088.87
Cc2d1b	5989.15	5947.62	5968.58	6183.59	6593.71	4938.71	5897.57	5405.77	5242.41	5372.67	5786.7	5618.72	5228.08	5883.66	3048.48	3833.87	6611.53	6144.01	4785.26	4310.86	5132.21	5700.38	6663	5988.26	5985.4	5681.51	6494.88	5753.8	5390.33	6137.3
Ralb	4808.23	5761	7690.82	6119.67	6946.92	5429.43	6820.94	6193.04	5361.68	5967.12	3856.2	3978.42	5168.77	5805.46	3894.68	3579.18	9585.35	13295.9	8511.41	9144.19	6143.93	6292.32	9384.24	9086.59	5681.2	9861.51	11031.7	7406.83	5326.03	8119.66
Arhgdia	120036	145501	179210	207574	178771	177103	160505	160058	154548	181034	125708	157738	147156	165212	127726	120653	263761	300838	264849	317213	155643	178730	292656	347583	257970	258852	277279	278423	327095	297195
Exosc8	11513.4	9752.01	11512.6	9335.1	10217.9	10381.3	11876.9	8340.15	10336.6	9677.81	10928.6	10037.9	9380.32	8765.22	9835.83	8309.13	12319.4	10429.3	8421.86	11747	10476.9	9825.3	12414.3	11650.9	12316	13165.4	15785.1	11332.7	9548.63	10390.8
Mbl2	1476.88	1711.93	1022	1109.17	4003.77	3291.41	1634.24	800.004	1733.87	2044.83	1813.93	1855.83	2174.72	2010.01	640.503	705.089	1098.99	1077.95	989.097	1505.65	1706.42	2034.67	3022.29	3715.68	2317.55	1041.86	1708.46	1411.39	2322.28	2530.38
Enoph1	7821.3	7717.33	5405.46	7314.47	12509.7	11293.4	9084.92	7994.58	9837.39	7867.53	7129.04	10424.7	11488.4	11828.1	9334.46	7178.95	10207.2	11150.1	8511.47	8776.11	8296.78	10564.8	9679.25	12494.4	9504.08	11018.4	7628.38	9403.45	9464.89	11151.5
Phf6	2977.37	2971.64	3208.71	2697.33	3011.03	3180.3	2817.23	3161.84	2367.93	2673.58	4337.18	3371.54	1409.23	2077.92	2592.88	2686.17	3114.74	3451.9	3366.09	3612.25	3504.41	2903.67	2944.93	2940.77	2878.83	3430.29	3296.66	3342.92	3185.03	2388.25
Dhdh	1443.13	1595.52	1418.35	1696.11	2397.99	2414.26	1968.7	1828.55	2702.66	2086.11	1887.99	1858.88	2768.21	3091.11	1895.79	1888.14	2624.92	2729.99	1857.6	2019.75	3241.01	3611.96	2308.78	1803.8	2317.57	1824.4	1676.5	1557.96	752.489	2074.43
Rnpep	10971.8	9860.53	10520	10174.2	11967.5	13214	9703.58	10504.6	11117	12275.5	7803.82	10115.4	10364.6	11957.1	8656.31	7485.56	7107.54	7435.19	9782.23	8782.59	8927.27	10265.7	11105.7	11257.8	9538.7	8403.5	11060.7	11707.4	10282.6	10853
Dsg3	27040.5	27067	28989.4	28658.1	23476.2	24251.7	24991.9	24434.2	23092.4	24551.5	20347.3	19685.1	19397.9	20772.8	19780.3	18974.7	30752.7	35082	34888.4	36001.2	29620.8	29296.9	22091.1	21425.6	26452.5	25225.2	23818.1	24168.5	23724.8	24548.1
Heatr5a	1297.21	1339.3	1226.37	1244.97	1589.48	1520.05	1178.05	979.099	1214.55	1286.47	1040.77	835.508	1156.79	1215.43	756.607	733.815	1006.79	1372.84	693.583	213.184	966.855	637.467	1339.85	1060.5	916.316	950.738	950.39	1317.35	934.809	1184.46
Asprv1	222117	211380	263559	330199	157243	177990	223641	310400	141649	209919	239767	203196	203030	197611	152266	175991	171336	242367	323638	301026	315758	329552	281790	237723	214669	163050	280794	328996	296733	360852
Clec10a	8648.88	8887.94	8888.07	11143.1	14081.9	15075.9	10244.8	12415.6	14285.2	15305.4	12664.1	13004.5	12298.7	12173.5	12164.6	11338	16145.1	16428.4	11834.3	13969.6	22674.2	18674.3	18824.7	16230.9	8716.55	8048.24	12574.8	12326.5	13903.2	14420.7
Lilrb3	141.613	NA	NA	NA	NA	275.558	NA	NA	NA	NA	NA	NA	NA	NA	NA	NA	NA	NA	NA	NA	263.241	NA	363.88	279.134	NA	NA	364.943	NA	NA	NA
Fip1l1	10102.2	9953.15	9635.78	9128.88	10053.2	9496.96	11180	9242.11	10511.4	8431.55	7538.17	9708.91	8591.13	7873.1	8784.64	8301.45	8991.31	10360.9	6659.53	5522.52	6768.69	7485.21	8493.89	8059.46	8947.81	8689.53	7116.9	6994.23	7546.11	8808.82
Flna	181930	195718	196366	203399	200154	202816	163898	166889	176235	181564	154738	163707	201301	202120	206994	197844	295868	305139	214110	230827	212203	216301	235029	254255	173068	179946	210369	210739	223879	224506
Bcl2l13	6256.01	8117.86	8560.44	5763.77	8284.01	8589.08	7984.17	7978.53	10458	11731.4	9118.24	9022.19	10795.2	9303.24	6224.75	6779.9	9805.1	7673.49	9317.18	7572.21	8370.75	10137.2	7685.13	8250.95	9146.16	10374.8	7708.66	7421.8	9374.69	7624.7
Basp1	607.484	343.642	385.756	1064.5	642.768	591.813	926.473	798.382	1922.73	828.644	803.762	329.624	1008.75	544.357	168.986	NA	NA	560.449	NA	NA	313.662	NA	911.848	1277.39	619.46	411.31	NA	NA	714.72	NA
Gsdma	72271.5	68546.4	74520.8	78312.2	54333.5	60159.1	71840.3	79291.8	57895.6	66234.6	79805.1	81007.2	79843.1	80014.9	71815.5	67574.7	71898.7	79852.6	141629	147692	104434	97873	76513.8	61684.5	88204.4	86194.2	85483.6	88082	86175.4	80096.9
Tpm4	95370	103536	109230	106065	114067	102869	96136.2	88068.2	89357.4	90122.9	89243.8	92382.2	90084.4	91997.4	56985.7	59779.3	96912.3	96312.1	97485.6	105360	93030.8	91685.9	130255	128519	112095	115534	105223	86431.6	114871	109271
Hp	49487.5	54953.1	22114.7	21765.9	6643.56	5850.77	2094.95	2030.24	999.776	NA	NA	498.759	635.047	852.556	2521.88	2220.43	92410.8	89691.3	80352.6	72727.2	43564.6	45667.5	NA	1050.02	NA	NA	1026.46	1417.64	2050.73	2574.72
Atxn10	13253	11388.3	11966	11175.5	14216.5	12385	11737.5	11933.7	13616.2	11621.5	10271.3	10901.1	13793.5	11936.1	8022.99	7537.11	9384.84	9192.9	7762.05	7977.88	7863.24	9766.57	10194.5	10668.5	10290.2	9674.48	6770.06	8013.04	10435.9	9592.13
Acyp1	9516.47	9630.84	9439.72	9192.57	11396	9851.48	8662.32	9280.27	10366	8797.82	8491.74	8303.82	9551.83	10692.8	7083.56	7065.17	8005.8	8206.47	7539.57	9261.87	7105.39	8088.73	11307.1	11881.9	10258.9	8282.17	8976.22	8518.69	13868.7	13653.4
Tbc1d23	2154.62	2328.04	2972.76	2787.16	3246.96	2389.69	3090.32	2008.36	2886.95	2604.95	2451.13	1954.74	3140.64	2368.54	1787.5	1382.8	2789.12	2460.6	2504.5	2808.33	2792.73	1688.94	2828.57	2891.22	2625.14	2646.38	2349.92	3172.03	2874.59	2624.25
Bclaf1	17853.8	20038.1	21469.3	14687.9	20814	17896.6	14846.9	19961.2	17928.8	17491.1	18221.1	17102	16110.6	15930.1	17813.7	18104.2	21420	22077.8	17233.7	17649.9	18117.5	19471.4	21819.7	21899.3	30147.1	30714.3	23413.2	23739.4	18186.6	22399
Papln	8423.71	8728.7	9420.69	8224.11	6301.39	5331.41	6917.43	6834.56	7787.21	8079.6	5000.6	7067.72	7577.19	7208.06	10356.6	8968.43	15655.4	14362.3	11216.5	13732.6	9394.07	9896.66	7376.93	7603.64	7794.82	8653.22	8818.21	7857.28	6943.5	6668.27
Rbfox2	1054.87	713.01	852.789	892.306	462.831	942.631	819.502	747.946	845.947	627.934	881.382	568.145	947.683	829.145	456.507	1035.21	857.886	573.071	637.103	817.732	724.35	1021.99	663.15	900.318	494.939	596.815	943.23	396.902	836.796	818.256
Nectin4	8709.02	10610.7	9813.01	10366.2	8666.46	8607.65	11507.3	10059.1	9441.86	9315.12	9263.69	9342.45	7201.47	8197.18	10004.5	8732.75	11910.4	10950.8	10345.2	11875.4	9393.15	10495.4	9846.03	10311.5	11857.7	12360.8	12602	11066.1	12920.6	12890.8
Ptpra	5752.07	5152.16	5557.61	5051.34	5758.54	5394.57	5708.54	5161.72	5782.03	5961.41	5130.87	4962.56	4976.13	5511.27	3428.93	4029.8	4962.18	4493.55	2823	4176.73	5052.18	4226.24	5721.77	6059.45	5418.98	4862.17	5657.29	5169.71	5350.47	5151.14
Cfb	23105.1	22258.9	20905.4	18876.5	29785.3	29917	13894.8	14917.6	17466.1	18851.5	15986.5	15046.6	20071.1	19589.5	10561.3	8585.97	23791.6	24543	18231.5	17587.3	20076.4	18448	21625	18622.5	15430.3	14565.9	19967.6	19868.6	18484.8	18995.9
Bnipl	4256.88	4775.21	4977.32	4130.05	4229.34	3272.16	5670.96	5223.6	4757.55	4578.17	4854.73	4322.33	4537.61	4991.17	5894.57	4619.5	5559.51	5490.74	4960.24	5298.97	5583.32	4931.48	3848.53	4601.52	5815.58	6672.34	6529.97	4409.54	4745.22	5433.18
Wdr81	2057.31	1590.98	1851.13	2204.68	1980	2088.04	2913.6	2343.02	2119.38	2030.1	1876.38	2659.02	2840.94	1881.02	2584.33	2587.21	1904.45	2182.71	1374.45	2541.14	1832.71	1972.31	1987.12	1775.59	2864.61	3002.54	2107.05	1953.63	2848	1917.05
Ptpre	1545.65	1260.6	980.723	1250.34	1547.75	1638.32	1092.05	1349.31	1043.86	1252.29	1404.4	1443.62	1181.7	1321.58	1119.69	1208.45	1605.41	990.265	1443.37	601.967	1208.88	1502.39	1766.87	2065.4	1530.04	1094.81	1367.26	1311.71	1040.68	1105.29
Pxdn	1811.64	2041.37	1605.71	1763.31	1583.97	1685.45	1273.3	1159.38	1561.75	1731.64	1067.87	1279.43	1490.38	1454.38	1096.06	1137.53	1413.74	1247.85	1328.45	1007.71	1381.02	1199.65	1015.03	588.819	779.116	744.661	699.844	774.744	502.922	548.2
Ide	154136	157288	149433	142825	132343	129121	158365	155201	158826	154175	160623	166343	173637	174190	186009	175443	179548	165517	334830	326542	221553	230240	163392	164245	172298	176187	193768	186163	190951	178173
Rpl13a	196743	206208	209300	196478	187810	171525	201816	182515	155490	164847	161919	164098	153730	163698	157717	138790	161775	152298	193533	187941	180091	206237	152919	152327	195855	214083	215865	204269	168061	167106
Gan	19247.9	15706.6	19774	18411	17505.7	17348.8	26581.8	29056.3	24287.3	22322.2	24956.8	25379.3	24505.6	23843.3	22793.3	19896.5	15323.7	16605.9	18864.3	17286.6	22311.7	21590.3	19134.4	17983	28172.7	25919.1	29928.7	31035	28961.9	28649
Abcf3	7625.43	6397.61	7187.2	6352.1	7022.74	6821.85	7354.36	7248.7	6738.07	6648.32	7792.07	6306.95	6021.18	6642.22	6013.74	5642.63	6035.7	6179.29	6030.18	6831.9	7276.51	6376.98	6649.48	6737.36	6604.66	6597.08	7880.14	7820.09	6542.41	5956.74
Apobr	1643.49	1862.72	2172.51	1583.73	1881	1715.06	1150.47	1959.72	1502.99	1972.55	1627.27	1941.94	1889.93	2344.01	536.56	NA	2649.26	2657.12	1468.42	1578.06	2075.18	2398.06	2910.96	2702.56	1575.05	2188.24	1664.43	1123.99	2228.98	1538.07
Zc3h4	1351.72	1793.37	1379.34	1134.02	1488.37	1799.37	1037.35	1190.25	1436.04	1155.43	1194.62	1219.12	1110.17	1165.64	1179.11	974.258	NA	734.651	891.729	467.716	833.21	1083.15	NA	1780.41	1406.59	785.243	863.822	1020.43	1603.99	1120.98
Slc30a1	1254.71	1362.76	1932.53	1524.52	1403.87	1229.68	1145.92	800.104	1295.28	1238.24	558.811	1325.01	1293.26	1068.65	1467.14	894.796	1222.47	1866.21	1376.82	1572.98	1266.3	1560.41	1072.97	761.353	1216.91	1157.11	1588.45	973.98	1020.83	1353.03
Rcsd1	NA	NA	NA	184.634	323.976	535.938	771.959	497.63	736.093	383.227	NA	NA	NA	461.944	NA	248.062	675.479	540.598	NA	NA	959.048	825.992	280.581	634.74	668.383	NA	NA	NA	NA	NA
Ap3d1	8105.6	9007.11	7977.1	8654.68	8556.88	8869.94	8521.54	8723.97	8857.12	8633.67	9493.73	8563.63	8856.13	8664.75	8242.64	7762.45	7076.57	6714.31	6364.71	6019.27	7666.87	7108.23	6475.89	5893.89	7338.11	7120.9	8082.68	7862.18	6622.9	6891.68
Rps19bp1	1644.8	1350.23	1948.29	2240.63	1467.48	983.281	1906.84	2346.28	1710.57	1494.44	1720.01	2415.28	1394.82	847.213	1448.83	1431.21	1249.38	2510.5	752.876	1973.77	1478.98	2173.63	1674.74	2332.57	1708.51	1486.44	1016.45	2190.5	2771.06	1966.43
Atg7	9414.34	9644.65	8488.95	9795.78	10453.8	9913.73	9094.83	10148.1	8954.18	9686.11	9150.45	9073.44	9687.81	9793.54	11009.1	10303	8503.38	9449.09	7523.24	8910.3	11525.9	10615.3	10513.1	8500.76	11875.4	11967.1	10278.8	8680.87	10467.9	9205.89
Arap1	5628.5	6030.05	5591.5	5637.45	7399.53	7695.77	6184.58	6543.07	5956.8	7049.61	5795.88	5564.38	6956.31	6704.45	5911.55	5339	4869.33	5409.72	3565.76	4877.78	4709.6	4907.55	6026.15	5692.25	5559.57	4303.69	5274.8	5865.97	5527.99	5486.67
Ppp5c	7126.07	6260.24	7836.31	7826.74	7254.86	7709.82	6671.69	7325.79	6949.44	8589.09	8334.52	7093.98	8014.06	7702.32	6351.66	6678.3	8505.4	8102.49	7594.78	5866.27	6925.35	6816.4	7938.88	6066.95	7867.69	6104.49	8237.08	8722.31	8862.17	7922.77
Lmnb1	57215.8	60677.4	61020.1	59447.2	58080.2	55726.8	65045.1	60977.2	66643.6	65084.1	60913.9	55040.6	61886.8	60915.8	43152.2	42059.3	66278	64265.3	62303.7	59476.4	57219.1	54356.9	64561.1	58669.2	57042	56946.1	63582.2	60552.8	53452.1	54450.7
Relch	5630.72	4609.04	5065.85	5509.59	5035.65	4506.97	4846.8	5242.26	4476.79	5444.76	5023.47	5254.58	5283.81	4731.34	4291.03	4588.93	3665.65	4430.87	4074.78	3789.74	4427.51	4272.87	4306.59	3258.34	4008.26	3187.78	3948.85	4657.6	4953.58	5615.12
Tln2	6548.95	6883.64	6482.29	6659.21	7113.92	7295.54	5274.43	5238.93	6976.28	7353.2	6927.94	6337.93	7591.56	7109.36	5502.24	5446.9	7617.86	9088.66	5588.57	6416.9	7543.67	7294.1	9161	9783.07	6604.51	5805.47	7531.18	7931.05	8010.04	7592.08
Stat5a;Stat5b	13605.9	12201.2	12108.8	13128.4	13002.8	12818	10946.2	10600.8	12673.2	12686.6	9221.4	10698.3	9958.26	12538.6	8169.96	7600.6	10693.5	10611.2	11070.5	10871.6	10788.4	12518.8	12671.7	10536.9	9838.5	9444.65	9976.94	11376.2	9475.2	9924.29
Git1	7932.03	7937.01	7025.58	6609.16	8979.76	8076.46	7795.29	7810.84	8075.03	8440.13	6332.99	7528.81	7837.16	6243.06	7006.46	7008.63	8569.73	6827.13	6450.29	6653.71	8256.59	6375.23	9146.62	8559.39	8018.09	8197.42	7052.86	6203.28	7493.51	6303.48
Morc3	1728.69	1385.95	1576.99	1436.03	1296.11	1774.06	1471.02	1464.02	1320.67	1404.12	1523.95	1194.84	1293.28	1406.53	984.59	955.659	1881.6	1724.87	1401.8	1384.26	1136.93	1769.09	2180.28	1316.66	1741.81	1923.61	1342.32	1855.55	1245.68	1743.9
Ralbp1	5131.5	4955.24	5057.79	4119.3	4934.87	5221.77	4544.7	4825.21	4425.29	5068.56	4397.39	4866.34	3823.75	5368.23	3993.45	4162.28	4320.32	4325.12	3274.48	2850.79	5081.51	4626.01	2992.88	4788.26	5310.25	5143.59	4373.24	5159.7	4777.36	4640.74
Flnc	18203.6	19030.4	18677.9	20341.8	22048.3	21486.1	20941.2	19968.2	41788.1	42768.5	42365.1	40954.3	34444.3	32708.8	22713.5	21400.2	30185.2	29742.8	24774.6	25611.3	190583	195776	24021.2	25371.5	19565.8	18407.1	25062.8	24150.6	22678.2	22501.3
Sco1	3125.11	2815.45	2307.77	3018.18	1667.88	3432.61	2369.31	2478.1	2234.41	2661.11	3915.03	2869.49	923.634	2913	1375.21	2636.08	3418.77	2786.04	2723.12	2235.82	3888.85	4521.55	2578.49	2768.31	2259.49	3368.79	2431.5	2601.64	2368.65	3442.15
Kif1c	2947.77	2731.02	3100.38	3060.53	2912.57	3065.02	3032.09	2800.21	3099.2	2623.95	3141.89	3313.64	2779.37	2905.32	2638.89	2461.33	2546.56	2331.86	2587.31	2765.29	3229.83	2855.2	2882.37	2823.64	2938.76	2801.72	3481.96	4088.51	3187.67	3103.53
Fkbp7	5871.59	6286.01	5153.73	6223.48	6383.76	8604.39	4507.9	5434.58	6175.65	6607.59	3830.79	3207.83	6546.19	5406.69	939.438	847.516	1502.39	1140.97	991.173	1991.25	1974.22	1873.72	1660.09	2288.66	NA	1479.58	759.821	891.657	1845.27	2090.26
Srgap2	3291.69	2630.66	3161.22	3939.05	3656.12	3460.49	4400.92	4626.09	3480.65	4589.1	3414.69	4040.99	4598.83	3942.52	1743.01	2196.75	4161.12	3504.39	2270.84	2706.14	4002.87	3502.26	3697.08	3353.86	3398.22	2924.66	3790.99	4619.74	4109.07	3449.87
Eya3	1781.95	1244.88	1444.65	1325.55	1764.03	947.4	1354.85	1309.33	929.811	1555.34	798.282	837.461	1200.58	775.548	1526.95	1319.6	1249.95	747.757	520.431	390.078	1643.79	557.006	1280.35	868.345	1597.38	1578.41	1586.28	1278.12	1769.01	1205.94
Atp2a1;Atp2a3	7050.06	7631.39	7465.76	6754.16	2292.92	6250.1	3627.44	4279.35	27810.2	28713.3	36311.8	25571.1	28351.3	29630.6	17154.5	19504.9	48129.4	47832.6	27186	31842.7	221556	214716	14743.1	15015.8	17922.7	14734	7468.72	7521.43	10278.7	13218.1
Eppk1	946436	975259	1002500	1036490	812592	852787	904785	904315	779021	818458	891956	846288	735264	766862	981635	959102	1004540	1045760	1208080	1289070	1035980	1054270	1160610	1113230	1170470	1132180	1355260	1349180	1398690	1395360
Vps25	16770	19875.1	16218	18898.1	21757	21699.5	17864.6	20567.2	18031.1	19034.4	16737	18198.2	20488.9	22838.7	15061.5	16641.8	14523.4	14166.9	16818	16985.7	15347.9	17146.6	17534.8	21925.7	12540.2	14253.1	9597.95	10264.8	22068.2	25488.2
Trappc10	1663.96	1225.73	1509.3	1331.78	1219.51	1345.13	1641.54	1294.17	1489.51	1229.47	1272.25	1353.97	1246.26	1455.92	910.426	1216.94	1460.65	1201.4	1045.1	1283.75	1165.05	1302.17	1235.86	1293.27	1609.45	1373.55	1373.21	1499.31	1200.31	1544.07
Rcn3	55849.3	32173.3	59226.6	48580.1	78070.2	64081.5	35334.2	36158.3	64766.5	66876.8	31081.4	26184.2	85986.7	52123.8	13064.7	9705.74	27302.9	29308.9	18201.3	19220.7	23400.5	14289.1	27379.3	23859.3	13118	13359	8491.33	11081.6	15214.6	14957.6
Mcm4	12541.5	10344.8	11176.4	11441.3	10128.2	10621.8	10882.5	12118	9757.14	10444.4	11879.9	9865.62	10624.3	9712.87	8818.18	8971.94	10248.5	10954.6	10196.2	11723.5	10108.9	10133	11008.6	9487.89	11436	10454	11815	10754	8421.53	10602.5
Eml1	5416.85	4703.83	5255.63	5690.08	6061.03	5792.45	5038	5206.94	6081.61	6112.09	4169.85	5527.9	6067.11	5808.16	3311.82	2803.95	5899.56	5839.33	3074.87	2805.99	5007.34	5945.94	3951.1	5196.68	3400.67	4313.63	4234.38	4436.23	3406.29	4062.29
Polr2a	6543.27	6778.71	6207.05	7142.69	5761.12	6056.23	6663.32	6643.45	5709.07	6318.02	6241.66	6153.43	6665.14	5907.83	5217.93	4859.49	6455.89	6307.58	6688.28	5328.37	6937.02	6192.4	6297.51	6093.58	6657.57	5754.69	7007.86	7059.54	5394.11	5640.82
Eif1ad	856.436	662.906	734.134	883.685	959.984	1467.99	1481.5	927.077	911.054	928.208	4220.67	918.81	1010.09	902.683	2170.38	798.529	1123.24	1560.67	1686.97	1127.12	1407.94	1153.02	1830.05	1152.59	2898.07	1919.99	1313.91	1173.5	1478.58	1465.03
Atic	32401.8	35167.6	33495.3	33259.3	34542.1	36036.4	31729	31366.5	37264	35817.7	36253.8	31196.9	40120.5	35415.4	30204.7	26177.4	40174.4	36668.4	38609	36632.9	33480.7	36964.5	38880	35228.9	37458.7	39069.3	37901	37552.1	37991.5	37122.6
Dctn1	28598	27648.1	28870.8	27597.2	29017.5	28568.7	26708.1	26915.8	26615.3	25914.8	24048	22664.5	24694.5	25043.9	19928.6	20701	27197.5	26536.4	28272.1	27154.4	28752.1	25458.5	30951.4	29669.8	27837.6	27710.5	29114.3	30809.6	27987.4	27940.6
Thoc5	5893.98	5043.78	5151.61	5949.36	4880.6	5043.16	5527.2	7063.44	4675.96	5844.42	5499.17	5175.71	5686.73	5476.18	4220.94	3840.48	6617.12	5168.33	4073.8	5301.98	6443.62	5107.89	4536.55	4908.27	6036.59	5096.55	5807.19	5364.28	3901.09	4730.69
Ghitm	7895.03	7984.98	8748.14	8969.39	8672.57	9082.07	9573.92	9241.51	10361.2	7887.74	7642.6	9075.14	7668.42	9872.46	9537.99	13418.3	10356.6	8859.05	7646.06	11757.6	9582.25	9119.73	6907.88	9181.83	7471.7	8319.81	6481.77	6411.78	8016.78	7467.65
Ccdc86	4314.23	2467.99	2251.81	3779.78	2209.98	3869.4	3637.23	3200.33	2756.33	2653.7	1952.29	2426.72	2995.14	2958.85	2891.23	1494.05	5002.76	3284.69	2666.83	2373.5	2448.29	3084.9	2612.92	2594.15	3624.28	2887.68	1194.06	1813.18	2453.74	1545.5
Tbp	1375.03	NA	1334.47	1291.36	1594.61	NA	1112.15	1176.76	NA	NA	547.963	1095.29	1870.09	NA	1013.53	NA	1174.51	NA	NA	NA	1240.29	NA	951.885	1806.36	NA	542.73	963.923	NA	NA	1615.37
Ganab	42097.7	40862.7	40627.7	39873.2	46341.2	47318.1	39113.2	38179	40549.9	41860.8	35615.7	35099.7	43362	43253.8	24409	24191.3	34784.3	34616.3	30822.6	33096.3	30278.1	34550.8	34921.3	31635.7	31683.6	31531.1	34834.2	34111.4	31801.5	31224.6
Pdcd10	43786.7	41730.9	44519.4	37756.8	41503.7	36836.6	38598.7	35198.3	42092.7	39776.6	32768.1	31980.5	42513.8	45026.7	32370.4	24076	33221.5	29711.7	30415	26640.8	28234.1	20687.9	36469.2	36756.1	28217	26993.6	20113.4	18940.9	46304.5	43664.1
Dlx3	1153.95	760.252	1300.92	523.994	1022.61	941.702	1223.98	945.379	944.965	712.104	1131.75	774.86	729.789	494.302	669.828	341.122	602.109	600.657	1134.12	653.479	842.049	240.447	945.702	737.339	933.375	399.614	774.42	513.536	1188.8	802.95
Dlx2;Dlx5	551.471	456.312	NA	146.194	NA	467.887	541.322	435.591	NA	676.324	331.71	1020.23	466.787	679.284	NA	NA	NA	NA	NA	NA	435.265	NA	NA	NA	NA	NA	NA	NA	NA	NA
Vps35	48472.6	46245.5	45468.5	47215	45311.2	46927.7	44740.7	45890.8	44498.7	45570.2	39209.2	38986.7	40316.1	43957.4	40720.3	38831.1	40341.3	41423.1	40672.5	42950.2	43814	41414.1	45117.3	44011.6	44726.6	40333.1	40286.5	40055.6	46077.2	46573.6
Rnf31	1197.57	1236.14	1429.25	1125.4	874.171	1153.38	824.019	909.207	1243.75	1047.49	972.837	965.679	1460.95	1128.97	571.185	430.905	1770.01	1179.52	1638.02	902.295	1423.97	1183.33	1427.63	1223.82	1104.81	1171.65	1128.87	1303.91	1308.11	1594.9
Slk	12918	13157.5	14153	13372	12148.3	13381.4	12831.4	13469.7	12829.6	13573.2	11674.7	12956.9	11035.5	12853.3	8617.24	8125.41	14198.2	15906.6	10096.3	12838.9	11705	12013.7	14949.7	16153	16306.6	15402.5	13967.7	14831.9	13127.8	14160.7
Pold1	2984.35	2913.17	2857.6	2321.82	2842.79	3193.55	3428.11	3305.32	3059.68	2867.84	3316.23	3426.46	2852.27	2995.9	4217.06	3825.64	2616.97	2881.64	3107.71	2574.49	2986.58	2665.07	2564.48	2751.02	3577.24	3764.73	2879.16	3401.84	3111.93	2964.32
Sfpq	89503.9	82771.2	77046.4	87256.8	75978.6	83738.7	78704.9	84903.7	82277.9	81206.1	99188	76852.4	90379.4	78647.6	57846.9	58317.8	74914.1	78544.2	66215.9	73313.7	80211.7	66626.6	79663.2	67355.6	83419.8	84538.5	72352.8	77099.3	66603.3	66867.3
Pspc1	13058.5	13741.7	14993	14366.9	13374.1	11905	15021.8	15691.7	15129	13664.7	14333.5	14503.7	13570.6	13348.6	7922.55	8834.81	13122.1	12302.2	11084.5	11190.6	14226.4	13500.2	12657.2	11926.6	11050.7	11046	14028	13653.2	11168.7	11751.1
Kdm3a	622.877	606.423	920.952	647.41	709	663.428	720.847	967.837	713.648	903.268	887.78	881.449	661.603	870.159	1055.63	1142.64	518.068	864.924	784.187	714.256	946.497	1095.05	711.741	1024.18	902.357	989.269	1259.34	724.093	774.583	750.057
Prpf4b	3883.12	4782.88	4461.33	4320.42	4419.36	4222.23	4279.78	3761.22	3941.06	4598.01	4070.6	3986.13	4920.53	3606.52	2643.56	2598.82	4374.75	4403.44	3729.4	3616.39	4251.58	3071.12	4268.84	4348.51	4290.24	2962.58	5040.42	4269.45	4406.69	4110.87
Abcg2	4241.82	3789.02	4196.93	4853.32	4105.44	4574.42	5243.12	4459.14	4391.2	5075.89	6389.73	6201.44	5766.36	5062.19	6246	5651.91	5660.49	4869.59	4285.75	4339.19	5922.5	5184.58	3699.63	3902.81	4851.07	4913.33	5226.96	3922.27	4644.62	4667.15
Cttnbp2	838.216	1188.55	873.752	857.213	750.496	707.681	1167.25	1180.49	1031.02	1143.48	766.243	855.578	1022.7	877.055	527.764	540.95	NA	727.018	NA	NA	599.425	NA	643.491	541.795	1221.63	1314.05	717.075	591.311	1179.21	944.093
Hirip3	728.051	NA	450.626	NA	444.144	NA	523.421	472.103	256.6	NA	269.298	542.216	558.531	115.326	291.862	NA	649.493	197.487	484.081	NA	965.057	NA	570.071	418.104	236.511	936.793	NA	NA	NA	567.979
Rnf20	5077.71	4515.72	4525.86	5212.44	4414.55	4480.04	5467.22	5204.49	4225.85	4757.51	4071.17	4112.91	4908.41	4665.52	2381.22	2714.4	4376.94	4976.31	3756.32	4059.22	4495.35	3930.14	4042.14	4529.11	4461.62	4250.32	4856.17	5348.83	3909.87	4233.5
Cep131	664.632	1059.06	994.856	299.496	686.112	810.708	511.926	779.207	771.015	268.457	183.309	572.039	503.463	300.518	433.764	NA	NA	904.372	NA	NA	361.612	571.343	415.405	492.397	NA	NA	379.307	1304.07	844.252	418.39
Pcnt	1090.64	858.608	922.635	858.397	978.216	1122.78	1049.89	817.309	891.787	980.61	1084.54	908.407	1030.89	833.308	974.264	782.688	1203.83	1075.24	873.53	1031.89	873.534	849.863	773.037	808.022	1068.63	799.689	784.608	718.097	1146.16	608.276
Nudt13	250.859	NA	780.609	892.548	668.643	943.826	986.856	757.952	706.392	1260.87	740.393	1070.06	941.869	903.281	710.166	822.576	1206.25	1352.45	1291.5	1442.08	1468.69	1333.92	1154.87	1080.33	1566.54	1016	1046.6	1089.84	688.343	1549.19
Ccdc9	12595.3	13591.4	12095.2	12208.2	12292.3	11883.7	13060.1	13323.1	9177.86	11328.4	13594.2	12141.2	12582.6	9909.39	9737.05	10522	11174.5	10937.4	9973.13	9249.4	13507.7	11595	11334.2	11976.9	14185.7	11582.4	11177.8	10680.3	12466.6	12023.7
Aprt	32456.8	33500.1	27889.2	32039.1	28602.5	35729.4	29729.3	35499.8	32926.8	33843.5	29309.6	29086.6	36343.9	37510.5	16898.9	22202.7	33710.4	37233.8	34000.1	35325.8	36143.5	37882.9	30327.2	35899.8	30573	30517	26949.2	34426.4	30871	32027.2
Ccpg1	1871.57	1752.64	1656.73	1141.27	1016.07	1079.86	1052.81	1016.87	1754.32	617.543	875.103	1399.11	1233.93	622.887	NA	540.678	NA	1261.18	NA	NA	435.653	1898.84	NA	1182.71	NA	NA	319.871	1675.73	NA	NA
Ccdc6	7587.39	7283.41	7524.92	8114.2	9372.54	9319.04	7399.13	7963.72	7118.16	7094.13	7211	5531.65	6669.49	7204.25	5390.82	4292.06	7363.45	6243.98	5341.7	6788.47	7051.57	5868.93	7612.1	6883.68	7175.36	7569.74	6217.54	6652.28	6949.29	7550.77
Ncapg2	1316.7	997.2	1207.03	690.678	681.838	774.256	1423.75	770.47	944.794	479.517	1007.42	NA	1819.29	1151.33	1732.24	1137.85	NA	NA	NA	NA	712.982	1306.79	NA	NA	978.267	NA	1308.86	NA	NA	NA
Xpo6	2300.71	1302.35	1377.43	1728.04	1340.73	1481.19	1514.91	1413.04	1483.55	1633.05	1369.22	1424.88	1912.51	1356.1	1575.29	1501.28	1118.44	1283.44	1838.94	4040.28	1395.56	1355.96	906.783	1807.97	1597.65	1910.03	1749.51	1840.13	962.404	921.292
Sptbn1	69795.3	72079.1	71944	70290.1	74433.1	74870.2	70281.6	69368.3	77173.4	75933.6	64910.9	63218.9	72877.5	72743	45810.7	42921.2	72915.5	72762.6	56473.4	59533.5	58650.4	55736.9	82929	77938	64409.7	61967.4	66044.8	67499.1	73750.1	70334.4
Nln	7988.41	6727.45	8000.54	6511.92	9140.16	8806.24	7038.27	5937.4	8409.33	7571.69	6646.22	6533.32	8621	8797.08	4467.43	5092.84	6698.06	6883.4	6552.58	5684.28	7510.81	6080.13	6697.87	6261.79	5118.61	6007.12	5322.63	5882.51	5498.26	6088.15
Ap4m1	2344.08	2589.94	2207.2	2855.18	2539.75	2607.99	1653	2796.83	2197.65	2261.98	3181.75	2172.18	2792.34	1910.38	2015.62	2597.25	2779.08	3117.15	2090.88	2584.83	3487.45	1842.61	2498.07	2177.58	2530.23	2737.04	2906.2	2682.5	2254.54	2397.47
Idi1	22179.3	27064.5	26879.1	27870.6	32278.5	32635.2	28904.4	28730.6	28763.5	32231.4	30867.7	28870.5	30368.6	33592.5	22180.8	22240.5	26923.3	28237.5	36455.4	35437.7	26823	26499.5	25017.7	27087.9	17692.6	21709.3	22989	25348.9	32921.8	28723.6
Acss2	3641.27	2881.82	4090.31	4213.52	4831.31	4502.98	4261.16	4099.44	4090.36	4329.23	3937.07	4347.45	4439.96	5161.86	5532.54	4186.97	4901.65	4544.81	4009.34	3964.16	4417.88	3980.16	3103.19	3082.33	4234.63	4117.26	4021.51	3935.7	3075.27	3129.57
Tpd52l1	NA	NA	747.203	1585.02	NA	897.892	NA	NA	NA	NA	NA	NA	NA	579.018	NA	NA	NA	1721.29	NA	NA	640.038	NA	NA	NA	NA	NA	NA	NA	NA	NA
Fgd2	NA	NA	NA	NA	NA	NA	NA	NA	714.956	NA	NA	NA	NA	NA	NA	NA	NA	NA	NA	NA	NA	NA	NA	NA	NA	NA	NA	NA	NA	NA
Hps3	30.8402	274.885	498.593	573.26	461.673	226.842	171.152	615.382	556.336	195.297	432.116	166.348	590.579	306.872	439.573	447.017	1823.1	185.908	653.878	711.915	631.392	959.917	208.292	309.324	445.844	379.258	628.419	534.79	489.683	213.486
Dhx32	1217.08	1475.55	1680.06	1201.63	1261.51	1373.25	1563.85	1072.86	1209.51	1127.9	1358.13	1272.96	1173.67	1476	967.642	742.025	1255.24	1220.11	1051.23	1052.92	1180.29	1353.09	1090.81	959.213	1326.07	1044.78	1419.31	1307.7	1499.73	1317.18
Mars1	16744.6	17418.4	17003.2	18404.8	16677.3	16623	18011.9	18244.2	14838.3	16998	17285.6	17807.3	15810.3	14636	17464.4	17804	13207.3	14834.6	16771.9	15581.1	17812.2	17959.9	13881.3	14754.4	17017.4	16964.1	16767.3	17530.6	17318.8	17156.8
Pgap1	5108.12	4648.85	4345.71	4424.84	4321.2	4124.61	5355.35	5854.37	4447.72	4847.31	5148.56	4762.65	4582.01	4246.81	7463.38	6260.74	3050.04	3677.62	3626.64	4505.25	5436.58	4206.42	4058.69	4196.56	4784.92	4773.71	4792.83	4678.94	4205.52	5036.53
Trim27	652.663	952.265	385.97	514.776	NA	547.302	809.432	818.583	NA	486.735	568.145	422.322	518.278	NA	722.014	544.06	574.541	718.527	NA	511.482	NA	820.235	884.03	748.296	504.842	NA	674.656	1292.84	NA	383.233
Rad50	3866.16	3692.51	4307.34	4164.58	3684.79	3527.72	3930.56	4004.18	4086.72	3803.56	3981	3845.76	3507.87	3868.11	2899.88	2498.61	4072.1	4199.04	3979.87	3117.98	4411.44	3826.96	3808.17	4253.5	3838.88	3925.13	4396.64	3845.73	3109.22	3545.39
Zfyve26	94.3976	483.159	492.456	333.108	294.596	203.237	781.39	435.157	385.263	531.065	350.609	165.796	213.117	758.365	244.782	234.762	706.038	469.128	NA	446.185	NA	NA	NA	429.614	NA	674.007	705.994	464.161	474.046	NA
Strn	17178.6	17265.6	17473.5	18281	15582.1	15521.3	16475.6	19090.1	16389.5	17821.1	15789.4	16383.4	15452	16051	11569.6	9803.17	13296.5	15591.8	14953.8	15061.6	16288.2	17009.5	15916	16181.2	16394.1	17000.6	18986.6	18403.4	16153.7	17023.4
Strn4	8959.21	7590.89	8476.95	8085.82	7317.9	7920.65	8934.65	8015.91	8483.17	8561.23	7613.12	8336.05	7983.33	7761.78	6662.79	6456.27	7463	5688.63	7679.77	8330.12	7561.88	5573.76	7727.62	7987.86	7640.56	8006.44	7386.54	7211.76	8965.27	7223.65
Ndrg2	4357.2	4297.98	5560.45	5396.67	6526.15	5951.53	6298.36	4534.78	9679.87	11402.1	10639.4	10102.3	10554.8	8863.6	15050.2	11777.8	12070.4	9550.04	8846.66	8524.1	31831.9	31042.7	4235.18	5403.23	6818.09	6442.26	4270.92	4240.27	5764.17	5640.49
Abi1	19770.2	21103.6	20502.8	21135.7	20084.6	22003.2	20131.9	19466.8	21514.3	20624.4	17794	19512.8	19507.9	18504.5	15405.1	13648.8	24244.7	23956.9	21021	18754.7	17375.4	19099.4	21816.5	24150.9	19995.9	20549	20429.4	21692.4	22482.2	24879.9
Plod1	7499.17	6268.15	5127.32	6683.52	7614.69	8633	4733.91	5069.04	5408.84	6336.1	4479.67	4684.91	5917.47	5251.13	2304.09	1834.74	1864.71	2642.36	2442.57	2626.85	2978.28	2530.52	3568.48	2281.52	1470.39	2348.2	2036.43	2360.75	1249.6	2416.9
Abi3	NA	NA	530.499	NA	344.799	NA	428.184	NA	217.859	418.834	NA	NA	774.888	NA	360.713	182.104	NA	NA	NA	NA	373.236	NA	NA	1031.48	NA	NA	1238.07	NA	968.988	184.891
Usp5	40822	42825.6	41741.6	42617.8	43974.7	43531	41902.6	42655.8	42969.3	41121.3	35807.7	39981.4	43735.3	44689.7	32158.2	35404.3	47558.5	49721	46273.3	45821.5	42812.2	41630.8	45593	46928.9	48588.6	48800.9	49202.5	46936.9	45030.5	48273.4
Wdr11	4525.89	3999.68	3972.47	4260.4	4187.76	4166.89	4400.06	4360.3	4505.83	4421.04	3894.26	3828.12	4253.69	4333.12	2980.41	3084.78	4047.6	4787.01	2971.71	3382.13	4256.98	3800.24	3846.16	3691.68	3807.55	3509.11	4281.55	4394.87	3979.46	3478.6
Acsl1	25685	24275.8	24555.8	26263	26052.9	25862.3	34710.5	35030.3	38362	36547.9	33555.2	34849.5	39209.3	41585.8	28729.3	24413.5	25270.1	25179.1	23190.7	24678.4	37685.8	38712	32361.2	29459.4	34405.3	31235.5	36403.5	35080.6	36590.5	37386.4
Dcaf1	5246.45	3648.99	4270.72	4709.12	3327.13	4020.1	3971.97	4222.46	4063.44	3872.22	3915.4	3882.5	3739.71	4147.57	4043.75	3710.99	4466	4102.59	3449.99	3930.03	4295.63	4917.4	4320.29	3784.49	5063.54	4371.75	4315.65	4104.95	4301.41	4438.54
Fxr1	10210	8514.16	10053.2	9353.9	9014.95	8440.52	8690.69	8136.47	8557.12	9817.88	8170.8	7830	7314.13	9353.33	7244.93	8636.64	9277.45	9507.66	8981.67	7488.62	10696.3	9080.73	10108.4	8790	10485.3	10032.6	10704	9219.25	8612.64	9713.51
Iffo1;Iffo2	2461.24	2087.39	3412.86	3227.98	2206.93	2973.79	2939.12	2340.89	2684.16	2266.02	2027.12	3377.05	1691.03	2238.44	3308.92	3672.41	1492.37	1883.45	2042.86	1598.51	2013.41	1619.41	1945.32	2270.66	3277.73	2364.49	2269.93	2320.23	1720.34	3465.72
Aldh6a1	28441.3	26605.2	27719.3	29499.3	31788.2	34094.2	28421.9	30322.2	37085.1	36631.8	29122.7	27259.7	36975.5	37637.3	27455.9	23921.5	34712.6	32208.6	26148.2	27937.4	35650.6	37429.2	25618.1	30026.3	30061.6	27115.2	29852.3	30040.3	32302.1	32449.3
Diaph1	23941.1	24382	25387.1	23974	25597.5	24741.4	21775.8	21940.1	21189.8	21207.4	19749.8	20460.2	18507.9	20816.6	19830.6	19390.8	22598.4	22528.6	23064.8	23957.4	23493.1	23144.4	24822.2	26218.3	24049.2	23966.5	19836.7	21517.2	22289	25202.1
F13a1	116611	112162	110995	113382	139947	129990	108912	106460	118555	114661	116819	113048	110972	116515	125739	120540	150727	158281	133051	138608	145232	145848	155878	168268	117359	120865	158264	176629	156711	146920
Ppcs	3426.9	3463.62	3877.62	3224.84	4724.39	4437.33	4407.67	4039.99	4643.36	3493.47	3861.88	4369.22	4240.76	5092.65	4596.11	5204.47	3983.2	3327.83	3520.85	4243.14	2710.45	3771.74	2259.61	3072.15	4074.81	3566.92	3349.85	2965.68	4283.2	4851.18
Cdh1	50629.9	52996.7	57482.4	54752.4	49736.8	48520.1	57796.3	57411.4	48830.6	51930	46646.3	49320.9	47854	46690.4	47247.3	44740	69859.5	66164.4	64198.9	67539.3	58007.3	58757.5	63174.5	56406.5	63755.3	65725.5	60363.1	60452.9	66723.8	62142.4
Myh11	45908.4	44663.8	51609.5	50076.5	50277.1	47710.3	40768.4	39630.5	50978.9	49805.1	46564.2	40072.2	77228.9	77418.2	84005	76689.5	163677	157374	52806.2	53071.9	66243.5	56988.3	94928.9	85655.8	54882.9	51183.1	67940	61343.3	69474.2	72704.6
Dhrs7b	8327.57	7691.73	7893.12	7970.29	8672.81	8355.23	9813.92	10227.6	8525.34	8032.65	10229.2	10048.3	7895.87	9474.27	10803.7	9375.86	8522.02	10019.9	7522.68	8139.15	8882.86	7279.02	9911.16	6939.3	9907.27	9968.21	8565.5	11230.8	7549.98	8410
Pkd2	1290.69	1356.3	1038.88	1183.29	906.976	1333.67	1193.11	748.319	1179.59	1087.85	1245.15	1101.57	1150.44	899.936	851.193	525.763	708.222	431.941	NA	NA	659.285	590.641	1159.85	758.193	615.999	355.743	888.123	1147.52	1055.11	1180.95
Scpep1	33736.4	33855.2	32271.2	33932.6	31271.6	33637.9	34300.7	35274.5	32634.3	35875.4	28415.2	35964.7	36694.5	39133.6	30494.7	35680	23977.5	26592.8	51494.4	51488.9	34424.3	34792.9	32662.3	35857.6	28589.3	28620.8	31047	33645.8	38948.3	40697.1
Ncald	3228.6	3725.12	3557.48	3232.57	3565.51	3229.17	2222.3	3121.61	3504.6	4886.64	4317.78	2839.48	5761.12	5291.09	3342.58	3560.39	3198.81	2272.99	NA	2573.61	2649.62	1338.16	3650.35	4298.82	3147.19	2837.02	618.434	1403.09	2991.21	3133.95
Cwf19l2	1074.78	1002.13	732.906	1005.03	NA	1218.89	1328.3	1011.38	1063.08	1612.81	930.392	996.904	NA	1013.02	865.753	764.233	NA	811.03	NA	NA	1478.03	NA	715.35	NA	802.03	894.47	1055.6	1911.79	976.008	765.823
Aldoc	14560.5	11528.6	13401.9	13728.1	14378.5	11984.7	14500.1	14195.8	13088.2	14300.1	14242.1	13096	18602.8	18223.6	11715.8	12601	16799.5	17365.2	13189.5	15054.1	9970.76	9945.87	23422.7	25144.5	20567	17944.5	20845.7	20746.4	19848.9	19130.8
Asl	8123.58	7925.68	9130.61	8514.73	10483.2	9040.36	9215.27	8440.76	10261	9289.63	9295.45	8125.1	11429.9	10179.4	7735.7	7549.24	6434.8	7327.02	7329.93	7467.06	8964.55	8417.3	9213.88	7897.7	8270.68	7906.1	8479.28	8254.16	9525.95	8226.97
Hebp2	15476.6	14416.4	15669.1	13917.5	12114.1	15022.5	16936.4	19155.6	16088.3	17389.3	19435.6	18929.1	20275.7	16936.9	16131.5	17722.5	12504.9	13138.3	10968.7	15045	18094.3	17172.2	12563.7	11661	16937.2	16028.4	13272.9	12132.3	21003.5	18516.4
Nub1	2514.2	2725.5	2981.75	3399.81	3039.61	2967.85	2542.84	2832.6	2571.62	2919.29	3052.34	2753.4	3125.83	3223.45	1936.92	2158.34	3241.94	3131.12	2866.66	4085.13	2724.76	2886.01	3656.92	3040.5	2855.7	2428	2473.22	2925.35	2916.32	3302.01
Atp13a1	9482.33	9573.83	9879.83	10435	9209.41	9155.12	9622.62	10298.7	9059.88	8726.95	8054.59	8676.56	7879.92	8629.63	7131.03	7877.95	8357.69	9096.5	7422.7	8520.47	10006.2	9784.01	8366.04	9723.75	8508.07	8896.72	9558.29	10496.6	7871.37	8597.26
Junb	2298.49	1880.37	2575.92	2161.91	1659.21	1428.78	2014.93	1213.35	1123.75	1523.47	1160.32	2511.8	2638.6	939.859	1336.71	822.543	1820.75	921.16	1394.77	1858.73	1654.23	1383.1	1728.18	1809.61	1622.79	766.665	972.009	1036.92	1188.52	1644.59
Clec3b	34411.3	32948.9	35628	28791.8	44894.7	47610.2	18388.9	21297	30037.1	26948.3	19416.6	24255.9	23483.2	23755.3	16926.9	13362.8	14287.8	11844.5	14599.8	17921.3	8741.24	10803.1	11634.6	13085.1	6887.59	8244.74	7214.87	7289.77	14283.6	13248.9
Bcap31	51536.8	51530.4	40291.2	51432.3	43128.3	56595.3	42559.2	49961.2	42996.5	48518.7	42660	40595	39702.4	43757.6	34365.3	39538.6	37744.6	43068.7	57006.1	40772.4	48720.9	40720.5	54739.8	52478.2	39522.8	41742.4	28436.6	40208.8	39195.1	53433.9
Arpc4	94423.7	101958	115954	109022	106885	103823	99152.4	96643.2	100852	94936	82243.2	82683.1	98972.5	103901	115495	100617	77937.9	73236.3	127933	120590	102685	99289.7	96608.1	115027	76462.2	80454.5	95814.4	94124.4	115442	109923
Rps6ka1;Rps6ka3	NA	668.862	717.211	1528.83	848.342	1541.02	1120.71	2741.38	794.422	1666.59	3065.53	1634.91	NA	1149.1	1723.9	572.058	939.447	1020.83	849.988	1505.12	NA	950.206	NA	538.418	NA	NA	839.587	950.067	1532.72	777.019
Igf1r	668.421	442.727	426.533	301.908	379.755	444.649	318.886	516.363	518.979	521.409	878.469	291.614	493.21	465.57	NA	NA	330.662	695.877	NA	NA	344.89	406.075	503.516	634.58	447.246	412.348	324.598	576.346	NA	695.565
Mab21l4	5536.85	6158.72	5907.81	6212.64	3892.84	5172.63	9042.77	8716.57	6006.85	6556.58	8105.29	8886.32	6481.53	6236.72	12303.9	12899.2	4726.69	4712.02	5903.05	5291.37	6884.75	6594.05	6586.99	6864.31	10044.1	9257.68	7249.1	6916.84	8595.84	8724.18
Dock11	4362.83	4230.21	3791.19	4415.86	4520.31	5364.18	4802.68	5111.82	4215.39	4793.1	4630.52	4544.53	4711.1	4438.92	3573.59	2890.15	4088.66	4743.61	4353.36	4221.18	4988.06	4273.11	5686.04	4848.65	4514.72	4616.96	5310.41	5859.41	4342.81	5147.59
Tnfaip2	NA	1385.02	NA	811.343	737.898	NA	1180.09	NA	634.838	799.715	NA	NA	NA	NA	NA	NA	NA	NA	NA	NA	NA	NA	1408.01	652.363	NA	NA	NA	1032.55	NA	NA
Tm9sf4	19295.3	18821.6	19457.6	20314.1	17522.9	19857.1	20759.9	20067	19588.3	19110.5	15278.6	18785.6	12738.7	18747.2	16942.3	14181.8	15101.6	16455.4	19130.9	15187.8	16815.4	18120.1	16737.1	17356.3	18478.5	18672	15018.1	17489.5	18114.6	17389.5
Crebbp	962.181	1448.29	734.772	1140.92	981.802	744.087	747.994	963.673	969.754	930.376	885.687	912.969	843.569	894.496	NA	737.587	747.676	966.29	NA	911.116	447.093	956.124	1627.76	766.298	548.337	168.959	658.071	847.934	500.602	739.547
Pofut2	3542.15	3302.52	3301.7	3552.21	4381.94	4373	3740.22	3307	3864.64	3946.49	2203.77	2859.58	3801.74	3404.78	1673.5	2748.11	1735.11	1752.35	1412.88	1370.08	2333.27	2004.73	2502.95	1675	1583.04	1807.98	2119.98	1479.87	2657.77	2284.91
Mark1;Mark2;Mark3	6090.83	7291.66	9620.72	6654.33	8616.32	7581.12	9809.46	6866.51	9681.99	6651.29	3729.19	5691.32	7526.58	3804.62	3903.3	3984.77	7123.12	5936.83	7795.38	7066.23	8948.96	7009.73	4896.07	7248.93	5264.74	5322.01	6564.62	7323.43	9811.69	7285.92
Mark4	888.288	719.813	1270.41	1017.51	676.546	491.197	1233.38	913.914	889.538	768.249	920.197	522.235	274.212	863.805	471.482	553.857	719.451	669.679	757.033	NA	1220.16	448.239	420.441	1025.24	889.334	399.098	531.985	923.194	575.824	276.183
Sik3	2846.49	2579.28	3507.3	3635.21	3866.39	2743.78	2775.7	3333.32	2937.19	2994.33	1873.45	2516.23	4555.83	2894.49	2008.95	1131.27	3307.52	2757.23	1950.74	1870.51	2605.12	3063.02	2394.54	2610.3	2081.61	2357.65	3468.45	2538.62	2362.04	3320.4
Sik2	NA	NA	577.887	344.229	527.986	NA	478.466	364.386	762.199	252.876	668.526	315.934	675.092	558.156	1040.52	516.735	NA	331.356	NA	NA	1188.2	NA	678.2	NA	714.307	NA	586.288	527.999	NA	NA
Hexim1	4776.75	3675.64	3847.74	3621.23	4420.87	4412.72	3480.7	3150.55	4326.73	4388.83	3438.74	3378.36	4075.49	3857.48	1421.43	1621.85	5349.23	6284.65	3348.72	1896.28	4594.77	4221.29	3847.95	4606.5	5234.92	3787.12	2776.42	4174.31	4493.58	3825.44
Casp12	NA	598.219	NA	693.761	NA	763.993	NA	788.105	473.288	788.854	532.983	NA	597.673	1106.01	NA	NA	819.469	NA	880.294	NA	379.205	684.755	844.209	859.225	NA	NA	359.952	1072.89	NA	974.69
Ahctf1	4169.73	4034.3	4388.25	4032.14	3657.83	4259.82	4260.05	4187.91	3765.99	4159.96	3885.5	4285.37	3784.42	3759.48	3965.69	3298.14	4134.12	4286.95	4132.37	3763.5	3662.02	3172.06	4405.01	4419.7	4672.72	4407.79	4622.17	4081.7	3440.23	3984.71
Ccdc80	6301.65	6194.05	6275.17	5663.72	7748.82	7641.81	4118.24	3397.78	3847.52	3708.47	2962.76	2699.33	3784.99	2848.21	2330.92	2152.41	3520.38	4710.97	2729.45	2573.07	2452.22	2550.26	2182.92	1930.92	1840.62	2482.93	1693.32	1708.08	1897.63	1489.59
Rsu1	22902.7	21705.5	22001.8	22506.7	25269	27573.3	17829.3	22469.3	25745.5	23587.5	21555.7	24711.5	28032.5	28701.7	20420.7	15416.2	19152	18644.6	16826.3	19385.8	15433.2	16022.9	29114.3	32598.9	18511	14239.5	11805.5	11712.6	23529.4	23756.3
Kpna3	12605.3	10979.8	13407	12553.3	11682.6	10735.7	13357.8	11100	10584.9	12413.4	9470.48	10166	10146.2	11722.7	9656.58	7600.84	15224.4	11586.5	10433.9	11800.8	15574.5	12093.3	13801.8	13143.2	13030.1	13073	12596.4	12830.2	14307.6	10860.9
Tet3	174.463	352.785	183.855	315.584	522.577	NA	509.822	333.37	455.05	150.895	253.825	192.863	357.215	252.849	204.428	307.923	NA	456.063	456.523	NA	204.273	272.06	NA	NA	NA	377.004	259.042	354.478	NA	NA
Fga	73826.4	71315.8	66594.3	62005.9	112882	106053	50135.4	45881.2	62976.9	56261.4	60874.6	53105.5	63438.8	64277.9	39924.6	38016.1	90714.4	78626	79955.8	85731.1	61579	62836.5	55704.2	54398	51890.6	51737.1	47808	54420.2	59046.5	52935.5
Rbm12b1;Rbm12b2	637.854	362.954	527.821	502.751	NA	413.496	463.524	774.869	534.097	342.309	366.957	380.865	202.089	677.563	627.13	620.909	NA	530.616	756.738	NA	NA	441.458	486.102	NA	753.141	626.209	389.941	615.662	749.328	178.261
Nap1l4	23056.8	21779.8	23437	24164.7	24758.7	25504.7	22982.7	22790.2	24191.2	22388.8	25732.5	22275.3	23258.5	23134	15858.4	13538.8	21390.1	25046.8	20683	22972.5	24709.9	25941.1	27141.3	24078.7	22437.4	24997.7	18999.3	19431.6	24423.7	23348.9
Nsf	21206	20346.3	20156.9	21133.9	20221.2	20383.8	19863.2	20847.5	18845.5	19498.9	21112	19353.9	19953.9	19414.2	18820.9	15960.5	18206.7	20127	18685.9	18236.3	22064.1	21569.5	18002.7	18716.6	19279.4	18954.2	20574.8	20596.7	18470.7	19310.5
Hmox2	11515	10485.1	11052.2	12055.4	11578.9	11976.8	11068.9	10754.5	10208.7	10614.5	13029.1	10690.5	10849.2	10954.9	8781.28	12362	11188.9	9832.55	9293.81	9513.13	14657	11599.7	11882.2	10834	10803.1	11641.6	8964.69	8633.58	11162	10168.4
Mybbp1a	34250.5	30525.5	31341	31344.6	27285.8	29089.6	30497.8	32361	27871.8	27642.4	30372	32280.4	28389.5	28981	28892.7	29334.9	28111.2	28175.4	31900.8	32072.1	32204.6	31772.7	27015.4	25971	34113.6	34944.3	26986.3	28902.8	27699.5	27967.9
Iars1	15945	16863.6	16636.9	16210.2	16502.9	16747	15067.8	16252.1	14711.1	16209.4	15824.8	16363.1	15722.4	15663.1	14220.8	14153.1	13307.4	14292.3	15119.7	17169.9	17869.3	18178.1	12020.4	14036	15650.3	12555.1	14826.2	16405.7	14582.4	15159.6
Sirt2	10511.9	8613.4	10589.2	10017.4	11311.5	11448.9	9211.43	9079.2	10327.4	10988.9	10236.8	9384.83	11608.5	9155.94	9883.79	9511.86	10973.6	10482.4	8563.88	9239.46	12040.5	9613.09	10648.3	8719.62	11694.3	9730.64	9519.25	8747.85	11446.6	10362.6
Actr3	69988.2	82166.7	85672.6	92000.5	80177.9	82068.5	88054.5	81954.9	78334.6	84286.1	67525.9	71576.5	71748.6	84006.8	83463.9	81159	110251	94007.2	118613	116406	100279	103278	87982.8	83188.2	85091.2	90870.5	108147	101009	94964.5	102693
Akap12	6913.85	6583.21	8463.92	8965.54	10209.7	12144.6	8709.45	9275.43	12362	12205.3	9374.16	8842.87	12685.5	11813.3	5338.22	4680.12	8538.09	10566.3	5291.08	6515.18	6433.66	6130.19	9673.96	9245.01	8003.42	7883.51	7031.88	7715.34	8598.81	8213.46
Nubp2	3884.22	2884.76	3527.97	3634.85	3975.5	3861.61	3534.47	3256.99	3408.01	3560.34	3008.17	3330.94	3482.11	3671.5	5078.48	5258.24	3996.94	4084.92	4119.28	4526.64	4054.91	3986.85	3178.23	5243.63	4561.31	3458.39	4035.25	3098.77	4518.38	4090.15
Lpgat1	708.629	NA	NA	NA	870.152	NA	NA	810.488	NA	NA	NA	NA	609.908	NA	NA	NA	NA	NA	NA	NA	NA	NA	NA	NA	NA	NA	NA	NA	NA	NA
Lsm8	26038.3	28442	20726.6	25594.4	21153.3	22732.3	20436.9	24987.2	24700.3	20503.3	18305.4	22033.3	22694.8	27396.5	23616.6	25119.4	20022.3	19707	23005.8	23010.7	20119.1	21501	20289	23654.8	20980.5	17828.7	19613.1	22187	21410.2	24387.5
C8b	5569.68	5036.57	5703.48	5388.08	6376.06	6138.41	1757.91	1747.02	1567.78	1228.5	1586.31	1719.33	1930.36	1780.88	3567.9	3031.56	9719.03	8937.84	8158.39	5905.15	9268.24	8291.49	894.497	1136.5	NA	864.155	1401.54	878.006	949.563	979.973
Chordc1	8415.42	8766.47	8955.04	8685.85	9072.74	9205.95	8578.96	8377.87	8151.38	8301.35	8260.33	8391.36	9416.03	9674.62	5951.24	8167.78	9030.68	8369.36	6775.68	9387.74	9625.2	7215.54	10276.6	10024.6	13665.9	12010	11737.5	10397.9	8375.46	8712.97
Rack1	341893	372464	353994	340903	316597	329330	351118	345091	325773	332783	316686	339526	294965	306426	312158	338308	316995	312446	423749	436545	396123	432007	300324	316117	358532	337250	393055	378230	389484	370797
Glo1	75687.4	75572.8	71753.2	73252.7	71841	67359.9	69582	62760.4	74892.3	69274.1	84652.8	69235.6	80021.5	68541.4	102127	85126.4	52344.2	50847.8	96356.3	88296.4	67675.2	69518	73257.7	72126.5	61574.4	65568.8	54863.3	52006.3	110333	97075
Med24	1294.8	1121.52	1270.17	1122.93	1568.98	1219.17	1498.54	1170.92	1305.13	1210.29	1665.88	1163.38	1403.31	931.586	1149.16	856.734	768.196	1114.57	729.09	1209.06	1395.26	1184.79	890.161	1341.82	1451.26	1021.85	1012.58	1331.99	1059.58	967.657
Azgp1	12220.1	10465.7	10483.6	12673.5	14199.9	16176.9	7594.32	8088.34	7536.26	9432.66	8178.21	8712.39	8781.77	11240.1	6764.21	6876.13	9503.61	15368.3	11128.2	13568.4	11937.9	9068.92	13597.9	9169.03	9187.7	9787.53	11061.9	12763	10370.2	9697.81
Nat9	838.449	2376.81	2470.15	2268.14	2682.71	2290.08	2426.61	2565.41	2233.47	2212.7	1802.08	1274.88	1769.75	3157.25	1958.24	1059.83	1637.48	3022.31	3150.54	2843.5	2346.71	2704.2	2177.53	3502.4	2703.08	2790.03	3647.44	2448.69	2740.1	2024.42
Dock9	3824.81	3068.96	3348.67	3637.97	3604.92	3509.48	3682.19	3574.93	3956.57	3833.53	3709.97	3395.01	3928.87	4615.42	3824.48	3203.39	4453.29	4669.01	3313.52	3386.11	3973.38	3960.15	4086.04	3411.66	3824.99	3671.72	3532.74	3423.37	3760.36	3631.14
Gcc2	1617.67	1627.35	1857.03	2103.63	2111.95	1581.77	1979.27	1662.03	1877.22	1797.5	1909.48	1770.31	1830.89	1580.16	1189.51	1190.57	1551.32	1537.66	1696.37	1736.6	1341.22	1367.88	1416.97	1736.87	1404.37	1306.57	1427.6	1612.77	1642.21	1620.29
Nop9	1055.46	1287.35	1184.48	1090.63	1004.54	1162.37	950.978	1441.48	1146.29	1144.87	1262.8	1071.05	999.649	955.676	1247.02	977.777	1234.17	1034.08	980.278	1124.53	1111.75	1254.51	1193.09	1458.95	2042.72	1521.58	1161.96	980.732	870.686	948.914
Kera	14343.8	15865	11463.6	11366.1	11647.7	12522.2	9943.1	10942.8	44448.3	41728.4	18945.9	21664.9	14815.4	16629.9	3596.17	3227.13	2033.13	1446.55	2883.47	3069.46	2191.63	2086.28	1221.5	921.793	1563.68	2096.87	2567.47	1142.17	2317.29	1715.49
Lrrfip2	9453.66	8134.73	9407.51	9195.99	10046.5	7812.29	6741.58	7911.84	6711.3	6718.24	6805.45	7393.91	7929.82	7670.57	5882.89	5383.29	12031.7	10640.2	9225.82	7705	10050.8	7744.81	12574.1	10453.7	8946.83	10732.5	7799.3	7101.84	9623.94	9409.32
Myo1e;Myo1f	10850.6	11557.3	12360.4	12138.3	10865.2	10542.4	10430.8	11027.5	10170.4	9793.36	9610.7	11138.8	8269.01	9768.42	13156.7	11727.8	11565	11245.8	11706	10505.6	12689.1	13720.5	9989.37	10115.2	11752	13235.9	11190.7	10718.8	11663.7	11306.3
Dcp1a	3175.59	2832.55	2465.4	3210.32	2958.07	2780.32	2364.29	2685.24	2538.52	2732.75	2004.43	2690.54	2092.77	1964.04	1506.31	2012.91	1587.14	2156.2	1310.87	2042.83	1509.77	2532.81	2117.09	2511.75	2641.17	2463.64	2703.98	2232.58	2379.92	2307.77
Sytl1	12499.5	13894.1	13992.8	13909.7	12277.7	13217.9	13833.4	14863.4	13527.8	14860.8	14428.6	15358.1	12625.7	12166.1	14897.5	13160	11922.4	11317.7	13018.6	12659.1	12517.2	13638.4	11480.1	12315.9	13765.6	14503.1	17642.4	15398.4	17213.9	16139.4
Ogdh	49186.1	48539.5	46796.7	50931	44854	45938.8	46517.9	44775.1	44056.2	45004.9	41457	41890.9	46198.9	46732.4	34095	37033	45050	45705	39785.2	41194.2	60913.2	56345.4	42389.6	37469.5	40382	40166.3	40451.9	46311.2	41245.9	43098.2
Stoml2	8775.36	9880.33	10229.1	9430.27	10050.8	11011.5	9593.79	9751.49	9643.79	9988.35	7788.67	7290.52	7741.03	10213.7	8462.62	5910.56	11924.4	12061	10301.5	9533.3	10022.2	9904	13301	11613.1	10348.6	10005.2	9174.26	8708.24	9272.48	8960.89
Luc7l	5648.12	3362.12	3505.21	3339.48	3898.76	4333.3	3940.24	3983.53	3761.09	4225.99	3618.71	3466.02	3445.68	3336.75	4248.59	4470.06	4069.29	3612.44	3133.43	3030.61	2630.26	3186.94	5165.79	3533.5	9113.37	5769.24	3966.75	4506.74	4092.24	3845.35
Adar	18959.9	5235.89	16218.6	11096.4	10808.5	10506.1	16440.2	15086.1	16316.1	12896.1	15403.2	12918.3	16375.2	11225.6	22713.6	14624.9	15545.5	8990.2	27677.3	27681.8	15553	20900.2	11361.5	8863.84	12641.7	16478.5	16323.4	10238.9	7892.32	12231.9
Nup133	6056.1	5975.66	6978.31	6018.38	5669.18	6203.82	6558.39	6376.75	6770.1	6294.12	5833.26	6200.29	6202.13	6432.58	5465.23	5038.09	6783.89	7020.82	5566.45	6012.92	6259.84	5867.21	6518.92	5908.12	6157.5	6064.36	7075.56	7445.65	6118.58	6249.37
Ca12	12626.6	16456.8	9560.23	10294.9	8869.64	9396.74	6421.8	9454.24	11063.4	10785.1	11825.1	9850.59	16646.7	18437.2	9453.78	9339.61	10294.8	8865.71	7887.25	8666.19	4274.13	4857.72	11642.1	13146.6	9157.35	8798.5	7651.46	7418.37	8575.46	8906.3
Pold3	721.705	1156.55	1333.13	1402.82	1125.66	1116.37	1099.63	1199.67	1085.37	1211.02	987.297	1368.62	1127.19	1012.84	712.67	915.677	972.603	1419.32	1014.59	809.453	838.234	1399.34	1366.04	1080	1525.15	879.357	1264.95	1277.82	1727.29	1014.77
Prpf40a	12145	11068.6	9898.5	10894.6	10950.8	11293.5	10357.7	12093	10216.7	11962.6	10143.8	10354.5	9576.81	10666.1	9171.22	9945.79	11333.9	11789.3	10634.6	10720.9	9632.87	10189.2	9752.58	9431.61	10708.7	11351.3	10977.5	11557.6	9656.02	10364.9
Sp2	320.333	751.756	459.987	569.239	257.037	640.936	732.727	496.645	901.448	642.896	561.114	546.879	667.979	771.988	407.072	394.281	554.326	273.141	473.709	676.083	520.711	223.516	645.731	435.301	413.164	662.177	934.393	417.281	444.574	465.395
Lamc1	37455.1	39349.1	38264.3	39454.3	35712.8	35765.9	36089.2	36341.9	41223.7	39551.1	34252.4	31901.1	39420.1	41670.4	23038.2	21056.7	44354.5	41936.8	36298.3	37805.4	33833.5	34621.4	32003.1	30738.5	26528.4	25267.1	29040.4	30848.1	29223.5	27896.5
G6pdx	80831.5	84644	87644	89219.8	82388.2	89580.9	86590.2	84430.3	80887	86457.9	84053.6	86145.6	84286.1	86375.8	77424.3	77212.2	96158.2	94969.5	99210.4	101705	100016	105694	82205.4	88585.5	93066.4	96385.8	115179	109946	97192.8	98054.5
Spta1	1472.71	1385.55	1396.84	1766.03	3394.86	3665.08	1045.02	1085.64	1704.84	1452.43	3105.68	2711.74	2486.01	2376.47	1220.89	920.235	1023.73	959.411	507.832	1362.95	1682.43	877.448	2251.24	2183.87	2507.44	2581.2	2967.36	2759.11	3886.87	3441.72
Nectin2	1138.15	1499.65	2053.2	1892.38	1640.28	1427.48	2253	2049.85	1880.35	1959	1888.32	1689.35	1818.63	1646.61	2040.26	1444.15	1641.9	1907.13	1373.49	1251.46	1581.14	1896.08	819.698	2088.52	1349.86	1192.51	1612.01	1800.02	2039.45	1848.89
Pole3	6414.4	7006.98	6727.99	7076.82	4316.28	8170.28	6033.51	7080.82	5345.62	6278.12	6269.7	6291.76	7387.52	9125.06	3998.08	5127.38	7599.41	7557.76	7403.18	7507.77	6739.4	6338.63	8163.81	7941.17	7823.67	8635.71	3208.11	6673.53	4886.9	7507.53
Tacc1	6387.32	6564.35	7718.06	5411.73	9092.42	7151.52	5638.29	7207.82	7200.84	6882.3	6018.95	6434.39	6703.63	7423.5	3363.74	4708.48	5670.4	6083.42	6442.12	6496.74	4199.08	4406.76	8324.42	6942.16	5203.7	4621.61	6996.52	6719.09	6290.52	8752.73
Cnot10	2085.98	1946.68	1517.75	1921.47	1607.25	2280.45	2297.96	2148.06	2009.99	2029.5	1549.14	1985.74	1860.01	1817.35	1868.8	2097.05	2157.08	1689.59	1767.91	1638.74	2010.68	1507.76	1462.81	1738.48	1402.15	2052.83	2061.26	1752.69	2409.94	1393.11
Ubqln1	4914.25	5296.73	3651.81	4490.69	3712.51	5320.02	5054.88	4656.83	6029.02	4562.27	4775.44	3030.34	3323.89	3431.24	5613.53	4931.28	5806.31	6798.19	6286.57	6199.14	5824.48	6833.67	7302.27	5364.4	8630.38	7945.72	4213.38	4517.33	8273.78	7183.69
Ppp4r3a;Ppp4r3b	5093.3	6262.66	5349.88	5641.91	5132.95	5698.61	6550.07	7383.47	5996.13	6287.09	6583.51	4710.56	6925.26	6255.36	2798.09	4804.55	4825.59	5417.44	5040.57	5392.76	6511.3	5515.52	6252.94	5115.4	6969.5	6829.38	5339.91	6418.24	5051.71	5851.72
Lrba	4532.3	5118.29	5149.15	4878.57	5340.39	4554.31	5957.09	5875.9	5462	5195	5126.05	4720.3	5527.96	5119.46	6328.32	6121.9	5470.75	4664.93	5405.42	4935.04	4962.67	5343.52	4994.5	4668.37	6569.14	6399.59	6568.82	5360.38	5928.41	5625.88
Edf1	7816.25	7608.47	7944.24	8445.03	10229.5	10563.2	5545.26	7355.2	6231.37	8625.41	4934.16	6828.4	5548.14	5366.42	8841.11	9186.99	5473.31	5506.64	6633.09	7675.46	4678.5	4882.03	7271.85	7218.79	5088.34	4018.68	5962.94	5420.86	7240.25	6727
Sec23b	12962.3	12772.1	13341.5	12571	13697.2	14196.1	13360.3	13153.8	14143.7	14126.3	14164.1	14369.7	12907	13089.7	15786.6	14061.7	13952.8	13310.4	15763.5	14712.1	14662.5	14564.8	13919.6	12595.5	15628.2	13993.4	14573.4	14460.5	13869.5	12685.4
Krt2	1590140	1674540	1655700	1715110	1389110	1452990	1441610	1578510	1451770	1633250	2154930	1763320	1498770	1541580	1488870	1593730	1994620	1996290	3689960	4448550	1822840	1918550	2342350	2186410	1950110	1980450	2202180	2291380	2274510	2373940
Nol9	2792.24	3144.08	3753.36	3728.76	4113.26	4209.25	3313.7	4612.78	3315.78	4119.98	3888.44	3529.91	3370.76	2875.88	4486.13	4564.46	2460.07	3111.97	2806.92	3380.58	4298.38	2859.34	2745.89	2713.41	3931.73	4018.57	3765.93	3221.55	3034.57	2389.94
Shtn1	9485.52	9243.39	10882.2	11351.2	12136.6	11532.1	11259.4	11336.4	10061.6	11129.1	8625.62	8820.31	10379.8	9184.81	8748.18	8451.22	11591.3	12544.7	11051.1	10860.3	9044.28	9417.04	11293.1	11571.6	10701.2	11360.3	9289.98	7512.43	11271.8	11426.5
Apeh	10549	10271.7	10132.9	10096.8	12214.6	11431.4	10012.5	10148.5	9808.83	10370	10962.7	10249.3	11082.7	12025.8	7907.17	6618.91	8819.96	8944.25	10129.3	10327.5	10380.5	9961.74	9036.6	9472.09	9756.76	10662	11234	9945.04	10682.8	11459.1
Pus10	4192.94	4645.49	4982.89	5027.54	4097.1	3847.65	4723.94	4232.75	4532.94	4427.61	3385.04	4119.16	4901.87	4411.07	3616.25	3655.91	5088.1	5102.91	4361.76	5087.34	4891.95	4911.92	4093.04	5185.25	5395.44	6851.39	5854.66	5616.05	4665.89	4316.17
Htatsf1	5129.3	5577.8	5331.55	6629.53	4583.78	5357.66	6129.74	5482.33	5814.43	5679.11	3921.32	3633.51	5237.11	5381.45	4044.59	3551.95	6527.85	5743.26	3614.57	4751.89	6100.3	4994.37	6415.86	5361.4	6183.69	6053.18	5590.56	5191.11	5314.42	5958.25
Gtpbp8	970.841	850.968	674.173	719.223	NA	879.02	458.194	797.574	NA	751.117	NA	411.086	936.968	678.513	756.935	875.902	962.856	1197.94	NA	880.582	450.313	950.317	NA	500.55	NA	NA	757.994	765.774	NA	NA
Nploc4	15248.2	16749	16161.5	18825.1	15825.3	17980.1	16722.3	18737.7	15834.4	18183.2	17514.3	15306.6	16508.9	18132.2	10754.8	11768.5	16673.6	17924.7	15851.5	17331.2	18637.2	19952.1	15143.5	16448.9	15444.9	16343.8	16604.4	19479.8	18721.5	17296.9
Bcl9l	803.284	1286.94	1105.14	1613	1990.43	1722.04	1663.7	992.448	1669.32	1757.1	908.57	1290.13	1520.09	939.89	851.58	1286.95	487.581	3608.17	NA	3267.27	986.436	NA	1363.45	1215.65	NA	1332.86	316.09	737.244	NA	NA
Mtap	15786	14716.7	14709.2	16186	18131.2	18191.5	15602.1	14523.6	18675.5	19804	15049.7	14987.4	18456.6	19476.8	16638.8	16464.2	15225.3	16752.4	16180.7	14937.5	17004.5	18901.2	15233.2	16397.5	13217.5	14329.7	18044	19605.8	18490.8	16870.4
Fech	8166.14	9064.52	9681.59	9356.85	9378.45	9300.37	8911.15	8445.65	8309.95	9053.22	9346.35	7515.71	8262.12	9991.17	7517.73	8931.87	7612.94	9992.69	7154.19	6056.67	10291	9043.62	10145.2	9163.65	8309.47	7633.63	5461.32	7781.65	7507.3	9108.82
Pls3	116316	121635	124104	127058	113204	117367	109609	120190	110332	108484	114456	106105	119758	113224	92157.6	98933.5	124275	127877	125137	130225	126564	121975	138364	135601	121372	121214	115442	110741	131663	141668
Dis3	9681.47	9197.15	9394.21	9741.45	8932.68	8008.17	9224.11	10117.3	8725.52	9420.3	8910.79	8425.94	9080.97	8245.79	7471.49	6000.13	9728.36	9992.6	8871.67	7325.12	9936.01	9444.29	9374.37	8763.75	9648.72	8810.18	9207.9	9954.41	8117.4	8825.57
Pi16	3269.74	2978.65	4623.07	3654.13	6696.9	5739.68	6974.43	8175.18	7635.7	7477.88	8008.36	9546.16	9495.78	7007.67	3774.66	3244.14	5188.2	5414.14	4170.44	3921.19	6022.71	7922.8	13075.9	11720.6	10530.1	9538.2	10707.1	13842.7	11645.9	12939.2
Wdr44	2056.87	2434.75	2480.3	2550.78	2725.31	2318.37	2638.84	2287.18	2136.69	2499.38	1984.77	2716.29	2003.87	2858.16	2373.83	2339.35	2545.02	2743.09	3559.46	1958.12	2430.33	2578.67	2104.06	2075.56	2554.49	2593.52	2291.92	2470.42	2657.11	2876.48
Rtn3	41536.5	43908.9	43748.2	40816.8	47708	44027.6	36164.2	38173	47877	48698.6	28172.9	34783.6	35297.9	43961.8	48124.4	34308.6	42312.7	39781	42836.5	42921.3	38527.5	33585.1	45912.2	49605.4	31220.8	33528.4	38155	33533.5	56465.4	56949.4
Mcm2	14567	14643.5	15103.6	14256.8	13631.4	13530	15229.3	14086	12251	14094.4	11305.1	12622.6	13245.2	13355.8	10681.4	10063.2	13822.8	14608.1	14774.2	12699.6	13907.4	13948.9	11281.2	13195.9	14683.5	13535	15011.4	15031.4	10940.5	10987.8
Gps1	16145.7	16836.7	17136.6	16936	17403.1	17822.1	16008.2	16943.8	17371.6	16812.3	15165.1	17034.1	15019.7	17487.5	18406.2	20770.1	11340.8	12208.9	13860.7	13755.4	16151.5	13834.2	12699.2	12940.6	12424.4	13050.3	13238.5	11406	17071.2	17986.9
Mvd	18551.4	21279.7	19458.9	19779.1	20707.9	20321.1	22661.8	22981	17380.4	21337.5	20144.3	21302.6	23590.8	19990.7	14440.2	12091.7	17645.2	21905.1	21573.5	19980.1	20219.5	20986	19894.8	24099.5	21947.9	20994.8	20868.4	23691	21511.3	23974.5
Dus3l	4179.02	3510.9	4253.58	3106.33	3168.45	4384.69	4533.41	3569.19	3839.22	4314.84	3655.32	3939.65	4282.44	3159.03	4155.22	3235.7	3563.23	3714.36	3229.56	3703.63	5100.75	3583.12	4447.21	5468.15	5025.96	4228.17	3862.59	3967.86	4045.82	5060.32
Dmap1	1856.67	1057.73	1840.6	1887.25	1569.71	2000.45	2103.41	1310.87	1483.08	1635.32	1794.8	1423.4	1681.45	1821.04	936.291	973.62	1326.08	1514.91	1789.45	1637.02	2096.1	1785.7	1282.27	1938.04	1846.57	1730.48	1694.74	1615.14	1511.48	1489.68
Sars2	897.152	861.776	1207.49	1088.07	713.445	1161.87	989.151	1088.72	1033.54	1172.57	1242.29	976.327	975.363	894.968	986.21	1007.57	1002.26	904.031	676.451	747.404	840.969	939.317	898.129	717.537	1069.42	758.771	869.99	1210.79	856.162	748.239
Krt10	2428570	2496380	2479320	2556310	1982720	2115970	1867310	1853690	1848230	1971140	2119710	1880360	1945740	1891920	1814960	1919070	3045850	3397040	6937280	7455880	2445250	2916780	3686970	3666640	2823370	2703320	3208910	3276360	3164840	3180730
Krt9	1177100	1197930	1252220	1171090	992740	1035510	1323250	1105930	1125040	1077770	1152100	1001240	1652770	1444940	1099670	1015850	778686	861534	3208950	3617550	1229420	1113160	2002180	1785150	2416050	2460830	3294120	2561690	3994770	3264140
Seh1l	5901.71	4090.73	4877.38	5177.71	3566.44	4691.63	5845.94	5331.36	4363.34	4849.89	4570.44	3302.86	5174.16	5244.92	2637.05	2849.86	4091.15	4598.38	4887.93	4898.4	6546.75	5345.07	4785.31	4564.05	5404.93	5256.41	2934.12	5115.42	3938.25	5439.82
Ppfia3	3660.58	3186.82	3644.31	3447.28	3076.03	2821.38	3295.34	3602.23	3111.22	2747.01	3493.23	3352.99	3288.35	3188.57	3358.37	2096.59	2826.97	2777.61	2872.12	2675.15	3115.15	2845.84	2836.32	2802.33	2967	3398.56	3081.99	3288.16	3386.08	3483.29
Ppfia2	3090.23	1864.57	3310.18	3206.49	2564.21	2191.43	1611.66	1952.55	2812.19	3129.43	3148.77	1150.61	2614.48	2521.47	552.526	569.257	1862.66	2943.28	2158.47	1466.49	4580.2	2473.45	1895.74	1806.8	2171.79	2191.52	2314.98	2463.54	1726.73	2552.83
Llgl1	2015.66	1733.48	2394.03	2613.78	1856.87	2440.09	2655.26	2738.43	2489.86	2301.89	2345.55	2186.49	1995	2166.81	1599.16	2148.53	2480.8	2214.32	2207.37	2558.11	2645.39	1952.17	2321.71	1599.79	2291.28	1915.33	2539.95	2802.48	2202.74	2415.65
Epb41l1	3777.92	3273.58	3324.15	2840.02	3366.12	4310.36	2833.46	3543.02	3688.3	4138.68	3096.03	3732.96	4927.74	4412.4	2616.49	2655.14	4605.92	4467.68	3376.32	2293.24	2973.51	2596.13	4686.35	6274.65	3728.86	3207.64	3912.21	3931.71	3857.03	4403.67
Nudc	32550.1	29437.6	30748	29267.9	30743.8	31568	29080.5	29924.1	28391.2	27789	22832.8	25797.2	30899.9	29274.4	19983.2	21710.7	31706	33416.1	31988.5	32979.1	29752.9	29935	32751	31082.8	29217.3	30764.7	32462.9	31360.5	26983.5	27824.2
Krt24	1687020	1746840	1870970	1860410	1439850	1489550	1674350	1461700	1519450	1446860	1557020	1376050	1570730	1358900	1293570	1282800	1390440	1340870	3272880	3373170	1621600	1678800	1966740	1702290	1747740	1786740	2340390	2088190	2220420	1999550
Fam114a2	8298.45	7758.98	9402.3	9126.57	7111.08	8023.58	7956.32	8260.2	8246.94	7894.97	7529.92	6631.35	8508.24	7279.37	4932.75	4676.3	6292.96	8011.23	8217.52	7721.44	9455.55	7774.47	8557.22	7942.77	9070.25	7580.93	8449.53	7826.71	8296.55	8680.22
Cobll1	4049.07	3740.38	4345.98	4297.03	3914.08	4184.21	3589.78	3591.59	3949.15	3419.37	4178.1	3992.42	3790.17	4034.83	3194.9	3148.07	2936.89	3570.58	3578.66	2856.34	2593.31	2971.9	3713.37	3907.43	3757.39	3726.66	3613.06	4017.04	3796.53	3995.02
Usp47	4098.27	3626.77	4390.41	4215.57	4098.88	3995.95	4408.64	4042.47	4158.3	3973.43	4013.83	3165.08	4463.9	3983.32	3103.65	2815.61	3533.07	4122.6	3537.04	3751.96	4198.68	3787.86	3433.24	4376.56	4771.4	4134.86	4310.69	4013.24	3733.79	3688.1
Snx3	20175.3	23326.8	21679.8	22476.9	26455.4	26218.6	21108.5	17398.7	19547.1	20488.1	26214.1	21411.8	22599.2	23242.8	24688.9	19676.7	21116.5	18644.5	23857.2	24638.6	15912	16993.4	26626.8	25903.8	14329.6	15442	15703.9	15341	25150.4	24376.4
Dop1a	655.808	885.855	736.062	695.228	1022.71	606.753	410.835	670.871	622.046	758.895	407.001	593.253	720.813	406.266	712.298	413.088	897.335	829.809	1171.81	861.503	779.683	675.533	NA	1076.37	450.912	NA	854.003	698.416	477.837	538.797
Rab4b	4213.54	2556.4	3182.13	2905.75	4825.94	4299.11	4355.86	4132.4	4428.47	3786.45	4713.56	4182.95	4180.31	4166.28	4720.31	3606.87	2386.79	3395.6	2853.84	2591.87	3829	3855.57	4365.91	3864.26	4153.71	3591.6	4544.51	3685.4	3750.58	2570.93
Uba3	7355.57	7545.3	6911.5	8494.78	7821.95	7947.39	6626.98	7273.56	6260.11	7759.29	6687.56	5860.13	6790.54	7187.09	4965.9	4579.45	6338.21	6438.37	6171.8	5464.1	7048.21	6072.08	8123.58	5973.61	6662.62	6113.53	6151.41	6659.12	7323.3	7686.19
Slc30a9	812.494	1379.79	607.962	309.331	734.597	857.633	929.908	973.02	NA	709.392	662.66	632.09	644.019	493.956	NA	531.001	753.929	318.286	NA	NA	903.951	923.307	457.973	636.078	782.628	142.616	803.921	160.032	877.099	838.216
Odf2	1095.14	692.127	882.833	697.964	615.393	740.154	855.759	633.875	831.898	810.207	685.814	732.612	682.585	564.484	253.985	476.856	709.383	704.946	363.26	NA	673.085	699.012	484.228	379.121	640.233	NA	573.585	487.79	305.139	1042.39
Tdrd3	4901.1	4931.29	5111	5787.41	4765.3	5110.79	5821.3	5968.93	4674.01	5496.11	5068.55	5847.86	4853.93	4712.34	5990.08	5116.5	4814.39	5325.99	3681.47	3899.15	4742.95	4894.37	5464.44	4630.81	6080.26	6140.31	5838.13	6142.86	5164.58	5349.53
Cep290	NA	1770.63	NA	2879.25	2272.17	1804.13	NA	3487.56	3642.83	2359.43	NA	2309.27	1814.26	2750.85	NA	1365.13	NA	3351.91	NA	2008.1	NA	2653.4	2139.03	NA	NA	NA	NA	2548.75	NA	2229.98
Dynlrb1	4405.76	2785.16	3648.88	3556.77	3797.04	3356.02	3344.28	3864.36	4141.24	4310.66	4627.86	1018.76	2743.86	3574.84	1810.42	1946.45	3730.03	3615.28	4136.27	3864.33	2813.73	3861.37	3537.03	2829.67	2525.97	3251.29	2880.73	2784.96	4359.53	5236.77
Dhrs7c	NA	NA	NA	NA	NA	NA	NA	NA	NA	NA	430.016	466.601	459.914	NA	826.015	400.229	NA	924.556	NA	NA	1984.55	1267.82	NA	NA	NA	NA	NA	NA	NA	NA
Rbm19	1071.2	1022.4	1192.42	923.13	971.25	1127.46	904.789	1260.61	787.73	951.728	1046.08	1100.69	1138.02	1185.93	911.049	1091.96	1724.88	1423.42	1790.17	1689.3	1234.39	1343.06	787.005	1492.89	1483.74	1156.94	1388.89	1710.71	1272.57	1045.01
Hephl1	1318.42	1372.79	1107.32	1164.68	994.903	870.12	1576.46	1688.15	1106.66	1549.71	1400.12	1682.22	1895.5	1505.4	1079.88	853.778	825.745	1049.77	2239.39	1750.75	1568.42	1193.04	854.771	1135	1388.22	1138.85	1279.6	1132.26	1168.62	1122.03
Foxk1	3906.36	4466.67	4175.32	4152.82	4811.73	4091.03	3950.18	3985.1	3622.94	3579.77	3708	3461.95	2666.32	3226.88	3218.42	2967.36	4057.16	3502.66	3439.81	3741.06	1728.17	3020.27	2981.71	3857.96	3606.29	3490.29	4604.89	3690.74	3935.86	4285.27
Sdf2	7568.48	4718.99	5969.84	4511.04	6189.67	4625.83	4553.56	5765.5	4330.1	5817.33	4614.78	4624.02	4352.8	3616.87	5475.75	3134.85	4888.69	5234.32	5998.67	3131.91	4557.97	4791.62	4330.36	4512.83	4474.38	5238.07	4267.26	5402.2	4088.82	4398.92
Sf3b3	30885	32304.2	29345.4	30993.4	25835.4	29195	33222.5	33243	29385.2	32274.8	28090.2	30955.4	27590.6	30083.1	26987.1	27693.6	27988	30459.2	32306.3	29832.5	30193	31037.6	26260.3	29227.6	29874.5	29823.9	32220	31446.8	29977.6	31977
Ints9	2895.62	3548.55	2628.19	3421.57	2903.35	2756.76	3441.65	4317.46	2774.07	3234.75	2965.28	2420.92	2721.04	2895.23	2526.81	1830.25	2395.43	2595.6	2408.24	2876.67	2827.06	2866	2514.74	2713.36	3018.18	2934.31	3299.62	3076.64	2557.1	2559.49
Ncoa1	NA	259.133	665.434	198.451	NA	510.086	NA	748.827	543.166	577.436	NA	NA	445.713	NA	370.789	267.428	NA	NA	1030.49	NA	NA	NA	NA	NA	461.158	NA	NA	NA	NA	606.175
Exosc3	2052.01	2284.04	1443.13	2742.73	2041.9	2018.21	1364.53	1977.01	2078.74	1626.54	1913.78	1643	1339.63	1469.33	2114.06	1466.55	1573.39	2613.91	3172.24	2209.24	1655.43	2118.79	2365.06	2756.27	2139.63	2061.6	2993.87	1964.48	2514.02	2329.36
Bzw1	38005.2	39109.1	37587.4	39994	38087.8	38365.6	38381.5	36503.1	36584.2	35154.3	34039.6	40960	34597.5	33729.9	34362.1	44866.9	36140.5	32764.9	39089.5	36272.3	42423.7	40396.9	35489.7	36052.2	42200.2	41163.1	29305.7	30563.7	37131.5	36678.5
Tab3	172.715	196.337	592.298	255.7	335.531	295.06	735.202	364.506	157.189	272.56	313.841	327.092	NA	359.605	175.859	199.513	766.194	NA	NA	NA	296.188	378.708	498.986	496.91	176.255	381.67	541.951	371.228	435.529	49.4227
Ntan1	3647.82	3094.81	2762.4	3145.62	3578.12	4228.86	2530.1	3442.51	3125.71	3594.41	2954.19	4054.8	3495.54	3919.85	5397.42	3207.59	2124.31	3073.56	2500.58	3185.27	3120.39	2541.16	2555.52	3205.12	2744.25	1994.51	1388.63	2899.47	2784.54	3478.19
Ctnna1	49763.7	56002.6	56733.5	55530.6	46851.9	50123.9	53360.7	54256.3	53977.2	53058.1	51635.3	53194.4	47180.4	47733.4	50140.4	43707.1	54079.6	56080.8	57411.4	60189.6	53860.7	52519.5	59977.5	59399.5	59634.2	59655.5	55218	55810	60107.5	59817.6
Chdh	16121.3	12971.4	13243.4	13483.6	11978.6	12802	13216.7	15579.6	13287.9	15058.4	17023.7	15574.9	14426.1	15639.1	15933.4	18331	11055.6	13896.6	14295.9	12879	14256.4	12132.8	15301.8	16185.5	18639.4	17924	14496.9	16408.7	15629.3	15445.7
Gars1	73542.9	77859.9	84353.5	82965.4	92341.8	82565.2	81693.5	82134.1	77829	78007.7	74728	73943.5	81840.6	87627.9	71407.5	69249.4	72556.6	77756.6	80739.8	81752.2	89845.8	82093.9	66696.8	73237.7	72634.7	75400.7	89570.2	83973.2	89007.9	83571.7
Nup98	13700.4	14503	13494.6	14333.2	12515.2	13750.5	15276.6	14036.9	13169.7	13150	12719.6	13711.4	12792.9	12139.5	10267.7	9596.11	16120.7	13783.3	12068.5	13969.7	14649.9	12814.6	14128.2	12848.4	14130.4	13967.9	13558.1	12309.8	13420.4	13962.2
Keap1	5663.61	5778.83	6530.86	6196.77	6755.62	6453.37	6984.55	6708.34	6491.76	5998.04	6043.81	7495.58	6374.62	6139.09	8583.16	6214.2	6218.5	5240.34	6942.81	6058.29	6699.68	6814.39	5387.92	5308.21	7132.64	7417.73	7777.67	6888.14	7044.48	7151.81
Apoa4	30196	30066.3	43615	41665.6	46729.8	46261.9	43441.8	43145.6	63657.3	62176	35867.4	35476.8	60731.6	64779.1	16377.9	17835.7	31899.2	33259.6	27884.8	27093.4	19844.5	19930.2	73437.6	72763.7	36315.7	34707.3	19202.1	20013.3	58264.8	56864.4
Lhpp	3925.12	6156.34	6839.89	7331.5	5918.77	7326.76	4830.89	4198.14	5255.45	5303.35	5706.26	7578.75	4774.63	5262.15	2514.2	3244.45	3055.4	6447.05	4193.19	3497.02	3400.43	5015.81	1361.3	4215.11	2938.47	4244.8	3249.45	3694.13	3371.66	3721.14
Kcnab2	2039.74	1802.19	1995.97	1468.55	2330.14	2175.44	1734.89	2314.11	1645.52	1856.39	1788.49	1258.26	1775.86	1153.69	847.51	1229.7	1954	2066.45	1222.81	641.054	2551.58	2599.3	2260.86	3344.14	1775.93	1569.14	1808.28	2212.67	1909.82	1307.17
Fnta	12460.1	10115	11940.9	12180.7	10715.1	11429.8	11214.6	11466.4	10268.1	10307.8	8618.03	8667.22	10775.1	11671.4	9397.61	9529.5	12687.9	10570.3	8059.02	10047.3	11889.8	10589.4	10902.6	7982.01	10546	10262.2	10101.8	9992.51	10682.6	12028.2
Plek2	1145.37	1426.39	1590.13	1164.45	1200.39	1511.19	1366.68	1685.1	1105.83	1354.4	1248.83	1362.7	1557.7	1250.6	1062.94	1230.58	2332.96	1722.88	1064.92	1059.52	1299.54	1285.29	1285.33	1111.27	1418.94	1599.28	1874.47	1872.76	954.66	1690.47
Aasdhppt	543.304	580.076	312.735	649.908	436.326	322.64	597.24	369.388	736.188	465.203	641.356	307.056	537.469	472.063	528.411	401.181	NA	310.545	507.894	NA	413.479	514.464	302.177	NA	332.394	NA	391.718	224.632	618.102	352.951
Serpina3b	25424.8	23536.9	30567.7	28019.2	31968.4	30847.8	105057	96070.8	100758	107493	91226.7	93666.1	62505.3	69499.7	30503.2	31008.8	36276.2	35318.1	27683.6	29246.6	35717.2	39167.4	35372.4	32507	65789	72197.9	65321.1	73785.2	62361.9	55431.4
Cdc42bpg	4778.18	4473.97	5241.91	4519.59	4141.53	3901.61	5557.65	4039	4077.64	4010.26	4435.76	4214.53	3984.44	3961.34	5231.6	4471.47	4434.16	3930.66	3719.4	3834.84	4276.69	3895.55	3828.7	4002.92	4955.12	4900.5	5056.85	5098.55	5008.78	4331.3
Dnm3	5416.54	5400.72	6660.66	3612.84	7322.75	6862.1	5423.12	4574.34	6147.07	6123.99	6326.63	6725.84	5528.55	6544.37	7014.82	6591.79	5416.78	4984.97	5441.87	4915.85	5269.95	4271.19	3665.09	5835.72	4657.68	3331.73	4235.59	5286.03	5857.21	5235.97
Eif3e	50986.5	51377.2	49192	52142.8	46611.3	47041.5	53201.7	52384.7	42965.4	46921.6	51027.3	45845.6	47048.7	44239.2	40192.5	34349.9	45078.9	45277.2	46934.5	48132.1	58131.7	53441.6	46743.5	46093.8	49877.7	48036.5	42944.8	43949	48145.7	47639.1
Krt25;Krt27;Krt28	NA	NA	NA	NA	NA	NA	NA	NA	NA	NA	NA	NA	181.08	NA	1615.61	1292.06	1690.93	1327.91	2426.1	3103.35	1948.35	2669.5	7915.24	8846.34	10859.2	13483.6	10768.7	10381.8	3852.52	3679.41
Camk1;Camk1d	5464.03	4775.73	5139.34	5028.82	4500.16	5446.52	6118.18	6695.99	3095.67	5580.9	10144.6	9597.53	6753.32	6839.01	10893.1	10184.7	2789.02	3877.51	4000.53	3410.33	5012.26	5555.04	6529.16	6569.16	10420.6	10147	5165.53	4371.6	7738.68	9673.66
U2af1	62017.2	54176	62880.5	44785.4	61283.1	54450.7	67146.9	60009	67251.2	62590.4	66620.7	71074.3	54992.5	58547.4	56743.5	51981.1	56478.4	59891	48377.5	47550.5	61263	65268.6	41961.6	47607.4	60902	79338.1	64702	55874	53064.6	51024.1
Psmd6	38150.2	32435.2	35455.2	42244.9	33200.1	36015.2	36690.2	41759.9	36100.3	34551.6	34236.8	30708.3	37748.9	34381.9	32717.2	31956.3	37275	36104.9	35473.2	33834.3	48103.9	39792.6	39521.6	33223.2	38873.3	39363	35044.3	32487.9	37418.6	40062.2
Enpp1	738.695	1211.63	622.704	NA	889.318	NA	831.032	NA	1049.27	1297.14	1196.62	881.682	1916.46	1467.43	990.274	1057.78	1129.63	NA	4028.78	NA	1159.37	NA	1792.96	1158.62	1752.16	1554.63	897.307	NA	NA	NA
Enpp3	3507.7	4651.46	3529.68	4522.42	4656.7	4923.69	4417.64	5346.72	5556.38	5741.68	5271.77	4829.1	5397.94	8447.61	3557.5	2796.77	2952.04	3125.32	2395.22	2872.65	2542.45	2657.72	4631.89	4530.15	3775.32	2477.65	3634.9	2982.27	2871.2	4187.62
Ripk1	4721.95	5063.01	4802.39	6029.62	5871.59	6141.68	5374.2	5411.91	5475.12	5799.83	5308.22	5200.94	5225.33	4870.69	3274.17	3685.36	4626.08	5366.45	4950.72	4648.29	4962.76	4987.39	4889.53	5100.25	5523.01	5155.37	5195.93	5180.17	4781.68	5107.97
Pgs1	1490.68	911.486	1470.2	1561.09	1308.53	904.684	1397.39	1315.48	1009.06	1178.73	1798.02	1452.32	1276.3	1165.5	2577.93	1626.06	753.016	1111.61	1547.8	1375.99	1196.05	1356.31	357.028	858.661	2029.79	1705.58	1215.08	1489.21	1003.28	1063.4
Hace1	2230.91	2669.33	2466.26	2425.7	1832.65	2957.09	3472.2	2998.81	2695.29	2145.46	2266.01	1875.62	2478.84	2407.73	2480.55	2389.54	1745.27	1980.58	2859.39	2075.05	2143.39	1397.17	1956.84	1948.9	2386.42	1985.89	3173.27	2421.89	3111.27	2216.19
Ndufs7	18339.3	19853.5	18802.8	18165	18648.7	18530.1	17296.4	19602.2	17218.7	15668.6	16317.3	21636.4	20664.6	21074.3	21345.7	19384.8	21490.9	23754.9	20036.3	19364.7	25514.3	28579.7	16191	16105.9	21095.3	21677.8	18492.5	25935.9	13424.9	17621.4
Rab34	3914.6	4357.26	3474.47	4090.48	3695.92	4375.31	3833.39	4177.46	4600.43	4139.75	3047.53	3456.42	5127.15	5249.79	2127.82	2135.68	3209.84	4115.54	3140.44	2409.48	2952.2	3264.95	3991.15	3302.89	2599.62	3143.1	3781.48	3369.47	2971.61	2839.16
Wdfy3	2371.33	2313.64	2470.62	2720.5	2674.04	2908.97	2326.36	2691.04	2184.5	2126.22	2329.65	2540.18	2381.54	2840.43	2241.74	2252.18	1669.13	2262.96	1765.71	1620.06	2177.86	2184.95	2359.54	2046.7	2494.86	2314.89	2422.31	2345.59	2113.92	2513.47
Echs1	47307.4	53227.2	52400.7	54883.9	51031.1	53679.4	56000	59164.6	62159.6	66934.2	47826.9	51791	53658.5	60658.8	43362.1	34593.6	60329.7	62739.7	54173.1	57800	54552.9	60666.4	60128.4	57926.3	56912.1	60101.5	66463	65931.6	60766.6	60763.1
Rdx	26171	25751.8	26839.5	25845.4	27345.7	29771.7	27085	26908.5	27940.4	25768.8	24264.6	21494.4	29975.8	26133.9	18824	14766.7	26646.5	25440.6	21388.7	22633.9	23166.5	25374.7	23452.6	23287.6	24280.6	22824.2	27933.6	24071	23087.6	21047.4
Scrib	8732.39	8669.17	8493.83	7771.59	7437.7	7493.44	8135.59	8019.71	7782.24	7756.38	9172.87	9241.37	6627.1	7291.69	9304.73	9361.01	7355.73	7404.96	7994.88	7510.79	7063.3	7545.72	6915.48	7643.82	8872.25	8313.21	8215.73	7863.68	8187.34	8584.47
Cct5	53669.6	49656.6	52674	51954.5	49183.7	47410.7	52565.7	53988.6	51159	53251.1	46968.7	49135.5	45455.6	48482.6	46454.2	44978.8	49969.2	46960.5	53049.1	57223.3	57741.2	55476.6	47327.9	44452.6	51707.3	49806	56110.5	60085.9	53361.9	53197.1
Cct4	89785.3	89939.7	96034.9	91032.3	89661.4	91714.2	95496.5	95229.5	87210	87671.4	89034	89987.1	82872.9	88493.3	84004.4	72679.8	84656.7	87101.9	96104.8	102597	95166.3	104157	83345.3	80897.7	86901.5	85633.9	106044	102682	95699.4	97987.2
Ocrl	2705.25	2667.84	2986.4	2686.52	3054.49	2684.81	3053.05	2628.67	2810.15	2161.09	2504.77	2477.53	2952.17	2656.33	2146.98	2914.6	2248.53	3314.77	2026.33	2263.88	2808.59	2390.6	3072.51	2416.1	2502.37	3357.07	3415.69	3379.84	3161.81	2372.42
Ttc28	955.839	NA	485.479	NA	656.493	653.052	623.41	429.812	NA	NA	404.9	506.694	NA	597.047	NA	NA	NA	NA	NA	NA	379.537	NA	419.614	NA	423.762	NA	NA	NA	443.252	600.317
Ankrd17	14887.1	14734.4	13848.3	16351.5	12633.1	14291.6	14303.9	16019.7	11647.2	14012.6	13220	13367.5	10972.5	12079	11366.8	11363.3	11438.4	13494	11215.8	13209.3	12255	11063.9	11522.1	11700.1	11774.4	11961	12635	14366.2	14094.1	13956.3
Plcd1	27561	27147.9	29173.4	30759.1	28070.1	28252.7	25141.9	26783.2	23899.4	25681	24227.4	24998.9	26628.6	25498.7	24100.8	25195.8	27485.7	29613.3	29746.4	29949.2	31766.2	32123.8	26029.1	26177.3	27496.7	26751	30127.4	30628	29782.1	29791.2
Cntf	452.974	352.234	408.641	358.017	759.536	410.143	597.746	228.897	815.848	674.939	805.948	594.37	1191.45	936.023	438.592	746.254	1009.56	514.123	988.889	878.211	673.414	405.381	521.625	277.315	NA	NA	605.667	NA	734.342	493.853
Kif15	252.505	349.65	480.565	393.651	NA	497.657	376.592	406.287	NA	289.811	393.234	402.647	510.413	NA	NA	345.437	NA	385.249	NA	557.602	370.524	NA	589.29	NA	970.564	958.91	269.771	NA	NA	NA
Mkrn2	2516.18	2436.83	2240.52	3567.28	3223.55	3020.82	3207.64	2817.21	2272.39	3000.22	2411.61	2896.47	2475.14	2881.63	2947.99	2804.14	2867.66	3105.79	2799.39	2272.82	3238.31	3352.53	2211.6	1394.3	1627.68	2097.16	2125.43	3177.82	3200.66	2047.11
Tardbp	56389.2	56898.2	50868.1	53665.5	52057.1	52669	52871.3	49987.8	53391.9	57074	56700	52754.1	58274.7	53252.6	44926	44453.7	44959.3	43430.4	54743	55394.2	56855	52509.6	50629	49842.4	53580.2	49993.8	53660.7	54139.5	52745.2	52436.1
Ppa2	12334.8	12715.9	11128.2	12644.2	12206.7	12764	10017.2	9731.97	10800.6	11617.2	11054.5	11491.2	14091.9	12440	7719.76	7752.31	11303.5	12430.7	10218.1	9133.38	11493.8	12443.6	13926.6	11894.1	11133.4	10917.3	10925.4	10317.9	12779.8	12253.4
Pcbp1;Pcbp2	41946.2	35541.8	39828.6	64608.1	31475	50936.6	51488.9	40644.4	46179	39146.6	28132.7	34686.5	44672	39405.6	45278.7	40252.1	27949.4	42740.9	60206.5	103082	32538.9	32491.6	40619.5	51410.3	27885.1	46865.2	49599	48277	35811	47819.7
Phgdh	191395	200135	179586	181870	182380	185014	178008	176545	168169	187825	199407	206983	179590	183584	186321	173877	167398	163041	203529	208397	192216	183062	170160	173297	169305	169798	151935	158359	187839	192624
Ptges	5587.18	5679.91	3455.62	4409.89	4349.91	4873.09	3140.28	3366.68	2960.28	4281.78	1401.97	2618.18	3546.42	5350.16	3323.49	3094.25	2801.24	1348.87	6444.05	5852.62	4194.53	3674.19	5096.4	4807.95	2500.39	2428.69	1757.7	2961.48	5644.96	4593.87
Bicra	NA	7758.33	11733.6	10231.7	11875.2	14896.8	19019.5	10152.1	20291.8	10520.5	13374.5	NA	9938.07	NA	NA	15393.8	13494.6	14163.6	13804.6	NA	NA	NA	NA	17276.9	14096.9	13454.7	NA	7728.62	NA	10173.5
Ahdc1	789.672	665.445	784.219	864.899	775.115	836.694	1109.71	732.439	919.857	701.84	948.517	950.024	955.632	799.797	905.438	991.521	413.274	907.767	647.409	NA	651.857	722.448	472.84	659.993	919.422	907.065	731.43	481.509	731.562	733.462
Trnau1ap	NA	471.446	NA	NA	NA	661.262	736.032	327.642	617.283	448.914	NA	571.339	715.79	749.368	331.008	606.213	NA	1045.69	NA	279.665	280.929	662.996	NA	1256.95	580.082	600.444	NA	717.248	NA	710.727
Ipo7	24143.5	26086.8	24143.3	26725.5	23545	23864	24514.5	23403.8	21939.8	23935.7	18282.8	21498.1	21640.3	22308.6	17765	16795.1	23169.9	22956.1	22594.7	24326.4	24429.9	25485.1	22646.1	24645.4	21702.4	19635.8	17077.1	19853.6	23963.2	23684.1
Mmp9	770.755	546.918	752.269	1178	NA	NA	NA	NA	NA	NA	NA	NA	NA	NA	NA	NA	3785.5	4139.96	4267.05	4358.59	6567.5	6549	NA	NA	NA	NA	NA	NA	NA	NA
Epm2aip1	4073.92	4868.41	4017.99	4341.07	4814.27	5308.7	4597.86	5399.8	4914.22	4731.13	5082.99	4924.5	5959.02	4916.47	5939.24	4447.62	1699.71	3583.25	2837.06	4089.38	4320.38	4733.33	3817.01	3261.9	4663.52	4135.2	5061.98	4675.1	5025.99	4300.9
Hibch	12476.2	12021.3	12611.6	12556.5	14763.9	15099.1	11778.2	12891.2	14264.8	12502.2	10662.4	11182.1	15606.7	14618	10273.1	10143.9	12934.2	13867.7	10862.9	9076.18	14037.7	12589.1	11542.2	12874.6	11725.3	9961.86	10012.7	11827.5	9782.83	10302.5
Ndufb9	16710.9	15526.4	17350.5	15736	13364	12795.3	18901.7	15002.4	18910.7	17279.6	22344	16085.2	15915.1	19075.4	24150.7	16966.8	10706.1	11070.2	9519.03	9194.03	22105	25443.3	13876.5	13267	13852.3	11519.6	10455.5	8323.41	14354.8	14788.8
Yars1	22227.4	22558.8	23454.7	22784.3	24412.6	22244.3	22645.6	21328.5	21694.6	21782.6	18469.5	18244.6	22583.4	20929.5	18398.2	16629.2	17440.4	18990.8	19177.2	17758.1	23807.3	21917.6	19593.8	19031.1	20886.9	19752.8	19268.3	20454.2	17791.3	18715.2
Slc39a6	1172.02	777.712	1109.78	NA	NA	NA	776.521	1083.29	1010.26	842.932	773.217	1343.16	NA	NA	NA	1956.7	837.324	671.664	972.206	NA	NA	NA	843.323	1500.02	1259.76	1201.01	1185.18	707.872	1387.13	NA
Nrdc	27964.4	27105.3	29022.1	29559.4	27631.5	26744.7	30464	31661	28988.3	29608.9	29172	30257.7	29225.3	30387.4	28346	25854	24050.7	22604.5	30996.8	29095.9	31680.1	32316.6	25983.2	25172.3	30178.8	30316.3	34483.4	34433.6	33934.5	33139.6
Spag9	9642.11	8164.54	9100.16	8422.98	10048	8963.35	8619.13	9101.17	8427.3	8852.19	8096	8271.54	8222.53	8583.43	5622.7	5487.31	9038.73	8071.02	6833.93	7720.45	8057.4	7536.58	8339.81	8574.19	8831.54	7606.5	7836.01	8185.76	8173.72	8165.72
Ppp1r13l	26750.6	26164.9	27982.9	26704	25016.7	24483.1	24677.8	22845.7	21557.2	23210	21743.3	22680.5	18182.7	19994.7	24573.1	23631.3	21547.7	19867.2	23293.8	22215.4	20353.9	20498.7	19004.9	19602.2	22941.1	23152.3	23795.1	24031.4	24557.7	25839.2
Fat2	2151.81	1897.05	2051.39	2034.22	1877.65	1706	2310.57	2130.19	1924.41	1975.18	2090.45	2049.71	1695.51	1589.04	2861.2	2369.73	1900.07	1988.66	2314.88	2093.8	1792.99	1851.95	1807.76	1859.14	2094.42	2306.09	2315.45	2122.93	2401.97	2139.22
Nup93	25080.8	26187.8	26647.4	27991.8	25513.3	26788.9	27575.4	27547.3	26179.7	26522.7	26575.1	25471.9	23084.5	25869.1	23272.7	21500.5	25686.2	24524	23946.5	24490.6	25425.8	25276.6	25496.2	25180.4	24977.2	24686.2	25275.2	26497.9	24938.5	25945.7
Gdpd1	2247.54	2263.64	2409.54	1403.78	1419.28	2188.3	1396.93	1385.92	2111.39	1825.62	995.093	2207.11	2618.79	2263.57	2333.22	1798.59	2198.62	1750.28	2000.99	1823.14	2669.8	1950.13	2496.96	2292.37	2485.76	1200.75	1654.1	1676.17	1601.67	2424.95
Clcc1	3811.35	3112.35	3369.17	3504.15	3429.63	3471.98	4135.09	4169.61	3659.71	3994.84	4017.15	3935.49	3881.78	3356.33	2879.74	2515.24	3401.07	2690.49	2824.28	2872.67	3499.72	3571.7	3254.24	3491.04	3841.12	3050.95	2852.39	3863.11	3046.8	2991.82
Tlk1	987.348	1110.02	1472.91	739.686	1113.17	1069.71	1332.43	600.757	NA	1204.13	793.522	659.045	680.594	1073.26	NA	706.053	503.863	1078.58	NA	1079.8	218.624	435.876	921.423	2363.86	1426.81	742.394	511.006	835.944	767.083	840.253
Antxr2	1454.76	1462.99	1870.16	1600.03	2153.27	2420.18	1868.51	1734.45	2434.77	1807.99	1430.4	2027.69	2540.07	1629.75	844.295	631.08	904.904	2066.61	2244.52	854.924	1226.41	1271.08	1798.62	1791.55	1108.81	1546.1	1895.69	2196.27	1225.5	1889.79
Gipc1	5015.66	4874.59	4231.5	4403.84	2614.39	4889.23	3422.19	4351.52	3570.19	4014.9	5635.76	4753.4	4072.16	4220.35	5249.85	6372.04	5617.28	7575.81	5660.73	5014	5402.45	5018.03	6233.58	6228.57	6393.57	6870.07	4914.46	5661.29	5776.74	5873.26
Fam3a	1501.18	1703.75	1237.98	1664.84	1632.65	1011.22	1667.77	1443.56	1692.12	1893.56	1356.53	1799.79	1421.62	1803.39	3200.06	2650.76	1283.76	1036.81	813.791	1835.57	2325.82	1552.29	1640.71	706.771	1987.92	2305.4	949.105	1425.89	1767.51	1845.37
Pccb	8487.74	8221.68	7662.95	8434.62	7482.29	8236.89	6696.36	8187.82	7092.43	7512.78	7072.48	7078.71	9487.53	9500.94	7428.32	7467.59	8235.44	8453.31	7677.49	7819.46	10723.8	9162.21	7573.69	8817.67	9747.68	9012.22	8287.18	7808.59	8463.09	7552.11
Dock8	2494.61	2233.18	2006.24	2322.16	2231.35	2508.4	1866.69	1881.26	1495.34	1754.47	1734.07	1916.1	1693.32	1834.43	2966.16	2718.48	2451.21	1731.35	1682.12	1922.41	1784.82	1984.71	1957.73	1692.77	2089.78	2568.83	2014.57	2227.81	2031.83	1927.92
Uqcr10	9761.5	8975.6	8083.88	5486.65	8112.48	8652.4	5455.73	5416.33	7150.35	5961.5	9688.89	6836.8	9521.53	7825.25	3787.94	8941.38	6643.15	7663.62	10635	10407	8567.41	5075.99	8867.41	5093.58	2903.36	6354.65	4981.63	1099.88	10545.6	6788.52
Habp4	4853.44	4241.34	1794.5	3165.97	1563.32	NA	NA	1544.11	NA	1407.92	NA	982.607	NA	NA	NA	NA	NA	NA	NA	NA	NA	NA	NA	NA	NA	NA	NA	NA	NA	NA
Acly	64356.6	67590.9	72973.2	71338.5	70779.9	70880.2	70818.2	72618.2	70818.6	68371.9	62750.1	66120.5	61847.6	66033.1	66047	65018.2	73825.5	68230.9	69793.9	69346.7	68726.5	72260.5	51323.1	55246.6	55288	59052.3	78765.6	74930.3	67927	67502
Rora	1597.43	1515.1	1520.47	1765.38	1761.98	1481.24	1698.24	1644.86	1319.4	1597.13	1753.76	1809.73	1452.72	1602.41	1271.72	1033.36	2287.76	1519.36	1478.37	1212.33	1561.19	2130.42	1693.85	1566.32	2014.5	1492.93	1932.81	1817.06	1412.36	1602.16
Hal	61356.7	65933	58149.1	59602.6	56431.6	57435.1	156502	157388	147126	146373	157621	149689	190923	200257	50765.8	51762.4	57053.1	64205.1	77862.1	78963.7	68629	69130	105803	113169	109680	108781	138281	133368	117168	113121
Ttc26	1265.06	1583.53	2248.32	2038.35	1137.61	1658.35	1305.87	1661.14	865.512	1617.48	1384.54	422.439	1548.79	1033.13	914.081	613.297	2281.19	1080.04	1276.83	NA	704.206	NA	NA	580.786	1139.56	392.152	2176.28	1205	1664.62	1615.58
Lipm	493.264	649.229	1157.04	NA	NA	NA	NA	799.022	NA	NA	1252.07	1272.08	1417.39	862.398	722.44	626.185	NA	881.118	NA	901.709	967.18	944.034	NA	1122.41	708.297	NA	1732.9	1110.63	NA	377.292
Orc1	311.057	293.253	368.602	114.633	200.229	279.264	210.728	190.227	NA	171.957	156.742	265.645	NA	279.43	NA	288.052	NA	185.19	NA	NA	330.539	142.767	NA	250.689	NA	NA	578.687	276.968	580.854	108.73
Ola1	29891.4	34450.1	35242.8	34165.2	33539.3	33093.6	30667.7	33813.6	29478.1	29736.5	33361.8	29151.8	30329.4	32216.9	28985.7	31791.1	33549.6	33814.1	31109.6	30610.4	33141.1	40365.9	29354.6	29994.2	35338.6	32473.3	33687.4	35846.7	34570.9	37908.5
Sptb	1534.17	1640.13	2121.59	1935.9	3542.5	3566.38	1585.11	1326.63	2206.73	2070.07	3140.25	3295.36	2840.09	2591.56	1398.86	1412.81	2170.13	2253.55	1087.38	NA	5266.76	4674.93	2496.58	2553.69	2278.58	2335.03	2606.34	2376.18	3151.98	3448.66
Vcp	157920	160280	172801	161552	159029	155687	165065	155928	177371	170177	149018	146990	143949	151908	131252	115775	187343	166471	198717	205309	176816	177825	173875	170611	161745	169614	182530	177404	191226	180729
Rrp9	4168.36	3890.5	3168.92	4127.56	4233.73	3086.92	3651.98	3845.25	2883.53	2964.41	2473.73	3902.5	4382.92	3195.97	3278.31	3325.42	4289.69	3593.88	3401.94	4976.42	4246.77	4742.02	4056.33	4146.92	4923.96	5643.52	3939	5013.29	4047.54	5450.91
Chil4	NA	NA	NA	NA	NA	NA	NA	NA	NA	NA	NA	NA	NA	NA	NA	NA	NA	NA	NA	NA	NA	NA	2681.71	3523.83	NA	NA	NA	NA	NA	NA
Chil3	2222.2	1884.21	4554.33	5721.76	515.83	767.441	872.494	882.573	978.58	996.449	576.765	781.022	1070.85	519.548	1043.21	1314.61	23812.4	24141.5	28011.2	30609.8	41349.1	34754.8	726.999	979.207	1080.05	1255.45	NA	489.135	NA	896.106
Kat6a	NA	153.821	NA	NA	NA	NA	333.955	149.56	203.441	NA	328.917	NA	NA	350.184	NA	NA	NA	NA	NA	NA	NA	NA	NA	NA	NA	NA	589.347	NA	NA	NA
Pla2r1	1751.15	1048.17	1314.77	1182.08	1035.25	1334.42	806.965	830.12	730.593	507.018	1224.92	509.251	623.638	899.905	599.31	795.1	1162.64	1232.99	681.169	627.35	895.468	811.461	1996.29	287.083	572.717	706.432	NA	740.716	NA	678.721
Psma3	58530.1	53508.6	61109.1	60427.7	56179.5	54913.4	58449	58473	59865.5	56376.2	55837.4	51455.9	57262.5	58525.9	50172	46417.7	55676.3	54392.8	78882.2	72427.1	63023.1	65943.5	56662.6	53897.3	55809.1	56798.3	62440.2	62978.5	54263.8	57134.6
Aldh9a1	20053	19439	22084.9	22635.8	24739.5	25074.4	22819.5	22656.9	25159.9	24065.8	17716.7	21776.9	23752.9	24103.7	17842	17232.7	21767.7	22224	20201.2	21503.9	22008.4	21469.8	20550.6	18546	19280.4	18375.4	21781.2	21803.3	22169.9	22923.1
Snx21	6062.51	4523.17	4534.22	6172.57	5415.63	6716.21	7454.34	6980.9	7448.57	7786.95	7547.54	5903.12	7019.58	4205.29	5940.73	4900.1	7973.85	5283.67	1483.3	NA	8601.37	5110.96	7539.94	6421.85	5578.1	2851.73	5261.29	6213.38	6316.14	4321.84
Crtc3	1606.95	736.185	871.647	1005.84	850.57	1335.81	908.086	406.419	640.658	999.427	834.426	1030.14	1016.8	662.291	1012.15	808.199	808.651	1388.54	686.583	1038.64	817.024	510.445	1275.7	796.837	966.076	985.102	NA	NA	1214.71	591.592
Icam2	1142.19	1280.31	1287.66	1372.03	1157.44	1256	1566.48	1507.84	1490.89	1404.37	1545.55	1688.21	1879.83	2094.01	1628.75	963.844	1742.79	796.489	NA	NA	2357.8	1296.03	NA	207.933	710.982	1145.96	1038.36	1196.64	1259.75	1383.14
Trpm4	1439.59	1932.49	1872.55	1815.46	1172.24	1947.71	1497.99	1487.97	1404.12	1258.33	1131.29	1494.88	1093.59	1280.98	1905.08	1997.94	1498.89	1029.39	2215.44	1909.36	1828.67	1699.75	1433.57	1314.84	1691.52	1908.56	1383.56	1473.25	1273.27	1066.03
Ric1	406.623	509.523	573.104	532.114	859.418	757.04	720.706	655.036	518.07	590.387	766.255	619.661	598.219	563.236	768.498	790.446	NA	399.965	672.858	579.561	689.634	694.395	709.171	529.219	449.451	393.974	372.842	464.419	406.853	536.931
Hsd17b7	15365.2	12882.2	17213.7	16480.4	14885.1	15108.9	12388.9	12732.6	10943.4	10862.7	10353.7	7798.99	10231.9	10660.5	16477.8	12642.8	23267.1	20842.6	15128.6	15252	17019.5	15888.8	11598.7	9275.87	14154.1	11165	12881.6	14686.3	13038.4	11890.7
Npepps	34776.8	35993	36361.4	38230.3	37563.7	34938.7	34026.3	35895.4	34817.2	35215.5	36696.8	34544.6	36833.4	36240.6	31901	34309.8	32337.8	32177.8	36084	38844.1	41284.9	40528.6	33442.5	31893.5	29345.3	31282.9	34962.1	36007.2	36517.5	37188.4
Padi2	NA	NA	NA	NA	245.596	156.247	469.453	NA	533.173	761.408	748.668	532.932	988.207	665.276	344.181	394.152	464.453	429.141	NA	351.708	2705.87	2256.06	NA	419.576	NA	429.865	444.457	454.339	NA	493.066
Dock2	1631.27	1281.03	1270.36	975.33	1704.76	1682.35	1054.59	1350.01	1341.11	1421.27	1233.01	1436.11	1322.89	1317.05	1368.99	1068	1506.34	1223.03	1990.58	1964.14	1845.42	1866.75	1962.12	2238.52	1793.64	1957.83	1259.7	1481.98	1349.48	1219.91
L1cam	4931.46	5553.92	5684.06	5093.86	4518.57	5568.1	4594.24	6143.6	5689	5685.54	5720.41	6051.9	5332.53	4658.93	4553.85	5748.37	6389.65	6651.17	5398.96	5146.71	5620.56	3994.31	4965.09	5726.75	5166.35	5359.75	4684.13	5010.11	6002.97	5174.21
Appbp2	753.934	1111.61	NA	816.678	488.291	NA	NA	934.738	NA	914.582	453.406	NA	808.051	791.869	1035.88	3689.33	1011.37	609.695	571.292	NA	771.399	1107.04	723.07	NA	1934.58	NA	NA	466.318	1135.95	728.407
Pcbd1	NA	NA	NA	NA	NA	1370.79	NA	NA	NA	NA	929.443	1038.5	1390.9	NA	NA	788.403	NA	NA	NA	NA	1428.48	NA	1456.98	1585.23	NA	NA	NA	NA	NA	2275.48
Ctbp1	8466.71	9421.73	9514.55	9795.26	8243.68	8158.51	8632.55	10242.1	9940.99	10621.3	9304.26	12072.7	8036.38	10919.2	10657.6	9847.37	6233.36	9478.23	7492.34	9964.68	8007.11	9565.76	8698.99	9291.04	11141.8	10431.9	8090.05	8112.91	8981.14	9375.41
Gpsm2	953.358	983.993	744.653	541.349	681.479	704.914	612.358	399.326	339.446	785.487	625.734	665.248	553.339	809.877	699.612	677.148	NA	667.416	720.428	66.8233	1133.08	415.42	1044.89	542.937	827.79	686.603	1118.2	695.998	NA	485.573
Zmat3	410.746	567.006	NA	227.524	329.843	181.421	NA	441.991	NA	NA	202.605	412.201	281.986	493.276	NA	NA	NA	555.36	NA	NA	252.59	301.821	443.3	NA	NA	NA	NA	288.779	NA	175.458
Prrc2c	7379.73	7611.28	7431.43	8323.17	7563.13	7951.08	6992.51	7374.75	8307.73	7654.47	7319.32	6418.15	5592.72	7165.19	5852.75	5431.85	6378.31	7406.87	6663.21	6036.09	6022.58	5863.7	7326.09	6798.18	6794.18	8468.04	5987	7080.13	7324.78	7111.88
Tk1	1483.64	1975.96	2186.17	1506.62	1779.75	2106.86	2191.83	1871.1	1337.43	1354.46	2018.45	2551.29	1632.87	1443.94	2121.51	2324.68	1444.39	1857.73	2053.74	1542.43	1934.03	1446.03	2215.62	1434.84	1965.19	2229.57	2499.36	1436.23	792.203	1404.5
Cul4b	5469.66	4985.13	5999.81	5021.81	4668.9	4950.5	5425.94	5382.19	5280.39	5376.05	3608.32	3977.97	4356.56	5155.39	3932.23	3938.61	4590.32	4786.53	5932.86	4068.13	6035.31	4745.4	4261.74	4870.93	4679.82	5005.54	5224.17	4247.37	4504.75	4133.24
Coq8b	2275.51	3520.28	3172.37	3922.13	2191.25	4053.38	3560.05	2692.76	NA	3173.66	3037.08	3124.73	1386.2	999.947	4769.57	5152	NA	3037.55	2643.74	NA	2889.24	3154.9	1381.98	1165.96	1630.74	1116.82	1580.47	2666.19	1807.19	3419.91
Mfge8	9257	7727.27	9814.14	9358.38	8309.58	9772.8	12096.5	11179.5	12424	12473.6	13920.1	12837.5	13446.2	12452.7	14537.5	17189.5	15195.6	16226.1	12315.4	13557.5	11294.2	11383.6	50996.6	45158.8	25433.6	24471.6	17121.4	20452.1	18342.7	20459.9
Srsf3	47142.4	48590.8	36747.4	37611.6	40817.9	41839.5	40970.8	40738.6	42193.6	42761.3	54333	48784.8	38357	37977.3	38651.3	33268	47106.9	39286.1	34293.9	38778.7	39478.9	37750	43704.3	37336.5	44643.2	41252.2	45635.7	42595.9	49154.8	42654.3
Nsdhl	21996.3	18501.3	22137.7	22685.9	18590.6	21727.8	28930.1	28056.1	24139.4	23868.9	16208.1	17291.8	21523.4	21486.9	22712.6	21611.2	22521.3	27370.9	17468.6	22394.6	23105	20783.1	20755.5	21686.9	23419.5	26315.2	25263.2	23868.6	21668.5	23274.3
Pfas	9823.97	11067.2	9603.7	9679.19	11092.4	11744.2	9258.6	10050.9	10496.7	10438.7	9922.57	9926.47	10582	11627.2	6706.56	5915.17	11664.3	11374.9	10317	12343.6	10412.7	11824.4	11144.6	10645	10230.1	9244.73	12587.9	12544	11189.5	12683.9
Tcp1	67327	73507.3	66319.2	73900.4	61546.6	63139.7	68462.2	69554.4	66799.3	67927.7	71015.4	63206.9	66648.4	66609.1	73720.1	72552	62149.2	62378.3	79602	69727.8	74976.6	71140.3	58409.8	57931.7	67971.8	66671.2	77476.4	78628.5	68782.6	69476.1
Ltc4s	NA	253.099	256.026	711.435	NA	395.517	452.852	358.457	716.701	569.699	247.628	531.047	566.823	308.666	NA	NA	NA	NA	NA	NA	NA	NA	944.74	NA	677.131	525.125	360.645	NA	1286.55	1302.35
Med27	588.902	401.194	765.761	609.271	580.16	774.751	698.347	859.83	504.126	868.548	875.016	971.264	776.702	1065.53	709.616	458.73	711.503	391.784	NA	1040.06	897.865	705.565	1181.73	935.695	517.784	925.96	591.523	215.06	676.734	309.639
Bod1l	1222.73	1250.35	1401.49	1250.48	1456.33	1486.5	1151.55	1445.85	1417.41	1092.55	1575.03	1314.15	1519.08	1554.96	1546.18	835.644	1942.03	1392.95	1928.45	1405.59	1074.26	1104.35	1967.31	1483.33	1999.94	1535.13	1838.02	1469.51	1777.99	1360.7
Necap2	5916.47	7117.83	7976.03	9426.22	9117.02	10956.3	9144.11	9861.36	9353.27	9992.29	7471.21	9017.14	5821.64	10101.1	5818.51	6424.62	9128.77	8359.58	7763.99	7521.97	6398.27	8623.25	8097.19	9783.45	7764.74	6836.98	8742.27	9941.69	8737.57	8829.43
Qars1	53183.9	53030.3	53525.8	51331.1	52838.3	51661.3	52966.5	52499.4	53066.2	53948.1	55462.9	51084.3	54193.4	50266.6	57825.9	52761.6	43502.6	43609.9	53827.3	52734.4	56098.7	60990.6	41429.5	39200.8	46651.4	44458.9	57488.6	56386.9	49033.9	51262.4
Atp6v0d1	32358.7	41166.3	31096	35436.5	32133.5	30652.8	28722.7	32561.5	32210.2	33890.6	25849.6	31706.2	35864.9	37262.4	27150.4	35942	31446.9	27837.3	36965.9	31035.7	27599.8	35761.6	29931	36967.1	30241.5	32936.8	27958.4	26632.6	35881.4	36166.4
Ermp1	11528.8	11027.2	11287	12496.7	11698.2	11144.6	13029.8	14322.9	12524.7	11617.4	11862.9	12536.9	9267.43	11205.5	7547.19	7982.68	10316.4	8962.83	6869.74	7895.49	9540.71	10179.7	8521.07	7236.84	10413.3	10923.7	10311.4	9826.16	8126.96	7564.11
Eftud2	21016.3	19368.8	19889.8	20507.5	16689.7	18728.3	20412.3	21140.4	17766.3	20429.5	19303.4	21807.4	19689.3	18504.7	15730.9	18132.1	16637.8	16839.6	17387.9	17244.6	19249.7	18525.6	17064.5	16153.2	18634.6	16571.8	19194.2	19698.8	16842	19401
Nrf1	4103.72	3182.84	2345.53	3090.16	2362.61	2500.89	3054.41	2423.01	2915.89	2913.6	4818.83	4007.04	3857.58	2814.14	5821.83	5237.34	978.708	2340.63	3409.08	3869.56	2769	2871.68	2301	2551.01	4958.14	5297.38	2227.27	1668.44	3249.71	2900.83
Ces4a	725.277	800.235	857.516	663.464	998.403	1054.56	905.872	1015.74	786.686	1097.7	1035.68	936.252	748.101	1054.79	1181.09	1344.72	987.748	1252.23	787.718	989.742	1225.82	1234.86	NA	416.226	882.691	519.787	718.179	776.542	509.265	662.195
Map3k7	871.959	814.293	889.609	992.345	1116.23	1149.78	900.132	1350.6	827.909	1004.02	935.773	1003.59	707.331	896.987	644.765	603.749	856.636	878.661	718.194	381.738	1147.49	755.921	533.526	1448.04	825.104	864.482	1051.91	1199.78	810.226	698.859
Mbd2	8509.84	8104.9	8530.43	8537.52	6583.77	7190.32	7694.1	7071.19	6095.25	7797.95	8395.03	7169.14	7533.84	6683.5	5143.03	4858.57	6755.12	8373.65	3205.35	5306.76	7569.2	6447.6	8114.29	8107.75	7031.24	8791.03	5311.3	4907.48	5784.77	7830.4
Tbl2	9787.57	8167.21	9922.07	9874.05	9252.88	10278.1	9915.7	9825.76	11339.6	9531.31	7261.31	8882.9	9390.76	8504.27	5272.15	4651.96	6469.89	6274.28	5682.53	5023.44	6631.77	7067.48	6855.64	5897.51	7093.76	6086.5	7485.34	7797.81	5994.49	5891.5
Abca12	5476.75	5646.05	5989.48	5789.18	4508.25	4680.63	6119.84	6377.34	5021.65	5526.42	6081.91	5953.66	5185.04	5201.42	8183.14	7797.56	5073.74	5487.37	6229.26	5974.93	6328.87	7131.8	4778.8	4925.61	6397.72	6735.67	6514.91	7121.15	6858.28	7324.35
FAM120A	15389.1	15545.2	14879.3	16246.9	16053.4	14774.6	14860.1	14395.7	14633.6	16089.4	13416.1	12680.4	12570.4	13671.1	10742	11586.6	14723.4	15698.3	13973.1	13348.8	12726	14643	14298.8	13472.7	15028.9	16627.7	15067.8	14669.5	13555	12397.9
Rplp0	157957	177962	163536	176812	148344	160794	149654	155386	162002	153420	151085	171176	128984	149599	136271	142136	147198	150663	199697	200065	167182	189409	135493	166090	141930	148301	175706	157340	158992	165410
Ptges2	3666.48	3809.24	3619.94	4217.18	4114.12	3700.55	4014.24	4080.21	3814.16	3402.21	3957.88	3751.14	3586.73	4312.24	3888.76	3402.51	2868.15	2857.52	3096.07	3153.13	4154.48	3361.39	2765.71	2810.32	3414.11	3267.17	2271.85	2798.12	2965.48	4760.65
Arhgef1	11241.6	10499.5	10291.8	10470.4	11747.2	11283.7	10293.8	10045.9	9567.52	10300.1	8311.1	9934.87	10636.9	10352.2	7546.74	7262.62	9694.11	10233.6	10685.1	9134.34	10757.5	9505.75	10428.4	10666.7	9202.85	9565.72	9105.55	8923.78	9442.55	9435.37
Eif4g2	20975.8	22014.3	21344.2	20741.1	19056.7	20039.9	21260.4	20727.5	18683.3	20209.1	19866.2	20779.8	20290.4	20736.7	19260.6	18394.3	16229.7	20107.4	20522.4	17921	19346.5	20300.1	17957	20067.5	22332.3	20661.5	16464.5	17811.7	17802.2	19126.4
Mapkap1	1821.32	1880.92	2025.97	2097.83	1694.67	2202.57	2042.23	2085.11	2025.7	2341.54	4487.57	2004.76	1838.64	1781.35	1803.05	2184.93	2055.7	1063.73	1710.21	2154.4	1998.43	1850.57	1942.38	1786.27	2230.63	2078.21	2233.25	1687.29	1338.69	1976.35
Txnip	1613.38	1889.13	1466.79	1251.58	1360.52	1683.48	1622.99	1624.65	1693.47	2164.49	2026.66	1790.33	1910.61	1378.9	2510.93	1940.81	2725.48	3630.48	1976.57	2003.29	1828.85	1662.9	1563.34	2048.71	1523.68	1853.91	1941.88	1572.85	1777.43	2744.42
Ogt	7514.71	7027.74	6917.74	7828.27	6986.96	7333.45	7282.25	7586.63	7212.19	8171.96	6877.03	7879.77	7784.42	7216.29	8118.38	7758.46	7643.78	7387.83	7768.34	8468.4	6995.92	7024.07	6788.02	8089.42	8065.05	7429.63	7010.82	7624.87	6697.92	7739.22
Trap1	242534	230745	234895	241903	238710	217457	214874	229134	205180	198298	223316	190497	215989	205619	203004	174310	248552	245474	229621	268121	270511	237889	242962	233018	254092	233325	233887	236026	199416	211764
Thumpd1	25544.4	27435.6	28474.7	28325.9	28173	26908.8	25672.1	26218.3	28090.3	24740.1	22923.8	25988.8	24826.2	27535.1	25821.2	22530	25982.3	26502.5	22736.3	24885.3	25857.8	24663.2	23243.3	27843.3	26082.2	25268.2	24293.5	24318.7	25938.6	27940.3
Rragc	4944.72	4510.81	3439.44	5408.78	4614.66	5723.34	5865.15	6255.96	4364.52	6129.23	4516.35	7103.4	4919.63	6501.68	4266.59	3937.58	3323.55	5573.31	6483.82	6932.48	5440.59	5931.75	6020.93	6396.07	4522.57	5037.92	4236.29	6665.89	3734.54	6724.8
Rpl34	194956	224042	220021	198523	206616	201482	222007	189444	198194	185326	191568	196104	176075	189205	182809	129547	152304	135429	181786	191706	184238	214258	144063	131040	165081	179369	240530	204893	153680	169713
Vcpip1	2036.81	2472.26	2353.59	2005.08	2615.69	2763.36	2504.98	2190.06	2761.1	2285.3	2566.73	2388.96	2455.13	2282.67	2196.58	1934.48	2711.34	2581.47	1893.56	2976.07	2470.2	2210.35	3033.7	2818.44	2342.81	1913.97	2615.82	2252.34	2768.31	2671.22
Vwf	3345.86	3075.6	3473.35	3925.02	5033.37	5218.92	3123.49	3691.73	4751.45	4658.78	4668.21	4277.23	5098.28	5044.46	3709.75	4196.38	4773.22	5438.68	4160.03	3540.48	5245.67	4276.36	3937.31	4282.21	2870.24	2981.22	3792.94	4138.91	5079.68	4630.91
Dyrk1a	881.615	479.232	NA	679.128	NA	927.093	NA	1543.62	1092.83	844.608	757.165	664.37	1040.47	595.307	NA	1789.26	NA	996.951	NA	727.697	816.291	848.92	483.537	756.549	1061.16	970.241	787.651	769.943	678.554	888.846
Hsd17b11	17388.6	15090	14871.4	16013.8	11949.7	15750.2	15521.8	13992.5	16448.3	15757.7	18111	15342.4	19675.1	16292.1	22488.5	22728.5	16169.6	16275.7	11927.9	10437.7	12999.6	15352.5	10722.8	14494.9	14691.7	14086.1	14189.7	13922.3	12817.5	13469
Scel	19838.9	20484.6	20990.7	21448.1	16378.6	17973.7	17577.7	19893.6	18880	19926.1	23971.7	20554.8	16833.9	16169	19902.3	17299.9	20413.4	18342.1	19675.2	20528.5	21644.2	20272.7	24362.4	20457.6	22237	21273.5	22969.7	24321.5	20277.8	20134.8
Sgk3	NA	NA	235.43	NA	844.033	605.863	791.464	NA	NA	397.813	588.988	NA	779.664	659.512	NA	NA	NA	NA	NA	NA	708.553	NA	NA	NA	NA	NA	NA	NA	NA	NA
Tmco6	657.337	281.743	539.232	745.342	583.975	NA	602.866	NA	695.687	NA	281.111	811.017	305.195	811.995	679.732	840.768	NA	487.932	NA	NA	NA	NA	150.561	298.292	NA	NA	NA	NA	360.674	736.981
Mia2	5069.87	5063.65	6151.29	5365.67	4582.64	5376.03	4238.75	5125.41	5015.71	5163.67	4295.6	4045.1	4497.68	4049.91	3585.51	2954.48	3905.17	4890.16	4268.38	3111.35	3538.97	3809.81	5129.47	4867.72	3986.09	3837.7	4803.22	3717.32	4752.06	4782.44
Gstp1	8894.07	14885.8	15989.7	14234	20247.7	18470.9	13281.9	12138.4	19583.2	15778	17461.9	16961.6	18552.3	19528.1	12526.5	10611.9	29718.1	25973.5	20065.2	21556.6	18555.2	15430.5	23836.7	24292.7	12043.3	15908.8	13969.6	11727.9	25700.8	22701.9
Ints5	1362.19	1068.33	1241.97	1288.07	1463.9	1386.06	1205.57	1448.26	979.693	1148.62	1121.96	1339.34	1310.46	1341.06	2021.69	1789.22	1279.12	1020.76	1846.22	1109.14	1434.7	1461.31	1407.59	851.244	1658.42	1518.21	785.051	1333.6	1469.92	881.174
Rab10	70379.3	81420.5	79424.7	70017.9	65863.2	57869.6	69285.1	60784.2	64155	61531.9	58045.8	66840.7	53568	59987.8	91038.2	71218.6	70231.4	72740.5	82682.5	75231.4	75809.2	78301.8	69418.7	71027.2	65644.4	73519.9	83148.2	81469.2	75526.9	82412.6
Trim7	1313.64	NA	901.922	1724.74	1003.33	1573.11	706.107	1550.75	832.009	NA	937.603	655.093	754.561	1339.11	NA	NA	1501.1	NA	NA	NA	1025.81	1536.37	1216.02	1519.26	NA	NA	1190.11	1518.06	NA	NA
Cilp2	413.866	678.408	591.171	244.092	504.724	277.981	343.191	310.451	3366.53	3375.3	758.661	1077.06	2238.27	2109.32	475.149	254.05	362.85	507.969	1377.29	1866.66	773.1	1110.12	461.124	511.803	839.72	687.494	499.856	407.776	NA	331.843
Fry	2951.42	2565.09	2397.14	2884.92	2116.07	2254.28	2519.47	2780.18	2804.12	2869.9	2333.69	2759.21	2661.53	2298.42	3536.41	2359.88	2237.2	1657.86	1526.95	1374.6	1878.12	2628.59	1744.11	1916.94	2400.29	2951.14	2181.87	1664.05	1719.7	1588.15
Apom	1358.21	1080.02	567.124	737.774	1505.85	1820.43	851.542	718.515	787.945	1267.29	1155.87	1613.81	1632.3	1501.46	1958.55	1996.59	352.145	NA	998.663	960.74	741.287	672.75	1012.41	891.944	1059.1	822.892	951.254	710.23	1369.8	1250.24
Trappc12	4100.82	3356.63	3268.14	4050.16	4435.24	4638.05	4555.3	4315.68	3553.38	4814.84	3512	3733.2	4232.92	3682.16	3253.14	3397.11	3410.29	3564.03	3484.67	3164.38	4104.63	3022.68	3406.02	4463.34	3988.68	3726.8	3227.79	3224.21	3829.96	4386.96
Rrp12	8298.54	8132.67	9434.81	9136.63	6934.32	8623.61	9299.01	9356.17	7991.57	7058.3	7868.27	8424.22	7145.79	7580.21	7778.68	7262.48	8818.43	7891.08	9256.64	8223.26	7922.49	8621.49	6566.58	7033.52	8540.25	7397.46	7760.12	8379.21	7799.34	8552.5
Galk1	12471.7	11148.4	11240.1	12008.6	16260.3	15051.5	11824.7	10784.7	14422.2	15225.2	10322.9	10035.7	16223.3	17079.5	6556.34	5068.09	10024.7	10072.6	7066.53	6100.35	9457.45	8701.46	11844.3	11375.5	6830.58	6520.47	10394.7	9146.5	8352.18	9398.87
Ppp2r5e	10888.8	9604.46	10417.1	9140.76	10050.4	8470.92	10470.2	9415.11	9276.52	8892.89	8062.92	9320.79	9904.27	9323.29	7365.72	7144.5	8272.01	9185.49	6338.28	5914.67	8940.42	8914.85	8092.6	8830.71	9262.94	8486.04	7867.78	7741.74	9575.44	9256.42
Rpl3	131863	121611	107726	115089	99239.1	94832.2	105555	122049	85934.4	97627.6	89575.8	103198	112068	102365	101583	118246	95829.2	124426	139135	137477	149817	157303	129757	115253	125027	112208	113120	127920	106191	116930
Cdcp1	2602.06	2870.49	2711.17	2537.35	2309.26	2135.01	2208.92	1993.05	2245.51	2649.14	2246.67	2419.85	1971.84	2141.74	2891.03	2275.1	2164.77	2290.79	2099.6	3110.1	2552.5	2499.64	2043.88	2612.02	2899.78	2366.62	2222.77	2383.37	2649.66	2479.97
Mbd3	1895.71	2207.38	1874.82	1852.39	2161.1	2206.26	1848.88	2010.32	2210.31	2252.21	1599.57	1999	2033.75	2141.63	983.891	1557.07	2436.25	2191.95	1863.06	2081.34	2206.41	2332.32	2447.65	1862.05	1870.56	2009.93	1553.18	1229.58	2202.27	2144.32
Pdcd11	3844.8	3079.64	3989.14	3806.1	3379.17	3104.86	4000.08	3788.97	3564.5	3067.12	3785.47	3322.39	3503.74	3421.53	3802.25	3470.07	3856.22	3933.33	3405.63	4246.48	3864.46	4169.18	2871.22	3041.42	3356.19	4629.78	4416.17	4122.82	4115.43	3870.17
Smc6	1045.72	162.684	383.512	510.712	348.703	514.076	434.135	NA	153.942	NA	871.017	293.291	NA	NA	487.225	364.403	NA	NA	256.87	NA	614.407	559.005	NA	977.474	532.528	263.593	273.515	577.019	NA	469.49
Synrg	3073.09	2853.86	3363.53	3016.71	3008.87	2717.8	3291.76	3397.6	3361.74	3311.91	3146.06	3165.76	2432.02	2838.96	2574.45	2341.85	3215.58	2667.72	2948.98	3310.59	2541.11	2256.71	2731	2783.28	3218.83	3111.57	3238.78	3063.39	3246.69	3480.12
Arfgef2	3489.74	2526.95	2697.27	2780.09	3296.15	2330.33	2269.03	2427.84	2540.76	1902.42	2135.77	2158.73	3065.18	2516.57	1640.75	1249.69	2905.43	2113.98	2206.54	1760.26	2569.51	2387.93	2788.05	2274.76	2600.97	2081.05	2450	2664.37	2242	2828.27
Steap4	6904.16	5252.41	5693.96	5799.78	8183.47	7791.46	5860.19	6381.78	7880.1	7008.75	4808.21	5458.49	8812.24	7953.24	6669.99	7583.37	8550.28	8544.07	6147.56	4113.52	10043.3	7099.37	7734.08	6260.14	3087.03	3271.86	4622.83	5061.43	4294.91	5748.65
Gys1	1670.27	1487.98	1235.68	1518.84	1498.66	1360.86	1298.36	1609.81	2798.3	2662.2	2530.31	2753.26	3311.65	3460.88	3326.78	3525.69	3887.17	3957.45	2989.73	2496.77	18768.4	16831.4	2099.77	1525.13	1810.63	2668.05	1652.66	2155.05	1429.06	1613.69
Cul3	17979.9	15041.4	16575.6	14524.1	14745.2	15376	17233.3	18568.7	15064.8	16201.4	17389.3	14997.4	19197.7	16331.9	13465.8	12887.3	12927.9	14673.1	13811.4	14528.2	18307.6	15315	14335.5	13745.8	17123.6	16664.6	17820.5	17505.5	15079.8	16337.1
Lancl1	30218.5	33221.8	27807.6	30224.3	30032.8	31040.7	29025	30284.6	25533.1	26200.9	25250.7	25274.7	26567.5	29944.2	27905	28106.8	29767.1	21167.7	28334.6	33106.7	31253	35896.9	20484.6	30556.7	26836.5	26983.5	25903.1	26954.3	31954.7	32020.3
Uqcrq	13468	11410.7	12583.8	13906.1	13150	12104.5	12589.5	12678.5	14025.1	12301.3	13740	16158.9	14863.8	15064.5	12532.3	13783.5	7937.71	7414.95	14278.2	10724.2	NA	15535.2	9033.89	9359.01	7020.84	7294.11	5577.66	5999.29	13657.1	10987.1
Baiap2	10031.2	10216.2	10117.6	9335.07	9707.09	9071.77	9508.58	10079.9	8711.58	8748.75	8701.87	10984.2	9360.13	8733.55	9981.34	9214.7	7519.18	7526.99	7856.69	8077.09	7398.91	7065.11	7471.48	7158.19	8375.32	7717.62	6303.35	7602.24	8937.11	8517.54
Efs	1495.05	1793.06	1930.91	1854.53	1002.38	1488.41	1381.79	1629.77	2044.13	1863.54	928.569	1974.81	1534.08	1500.42	720.212	868.708	1108.23	1116.82	1804.03	1548.87	1196.95	1195.8	1693.59	1864.63	1087.33	1512.53	989.285	938.895	654.987	2082.22
Niban1	14348.8	14555.9	16402.3	14737.8	19860.7	19443.1	14588.6	13416	18159.1	18098.5	13246	14744.3	19200	19099.1	11461.3	13674	13007.1	13958.9	10706.9	8632.72	10733.3	9833.9	17394	14176.8	11419.4	13674.9	11929.9	11086.4	14263	14349.8
Znf524	NA	NA	554.299	NA	NA	NA	NA	505.867	NA	NA	NA	NA	NA	NA	NA	NA	NA	NA	NA	NA	NA	NA	NA	NA	NA	959.844	NA	NA	NA	NA
Arhgap18	1300.74	1280.82	1107.56	1309.11	1573.72	2064.59	1317.64	1443.74	1227.24	1146.33	1107.45	1067.05	1519.1	1413.85	776.677	834.752	1172.59	1324.96	1617.07	1039.94	1009.7	797.681	1448.11	1040.09	1226.83	1014.25	1106.18	1255.37	1690.9	1241.55
Casq2	NA	NA	NA	NA	NA	NA	NA	NA	3210.05	2708.86	3294.88	3395.71	4513	3413.81	1419.47	2096.74	1252.28	2085.07	NA	NA	7781.43	7914.92	NA	NA	NA	984.327	NA	NA	NA	NA
Noc4l	2256.45	1738.2	1597.82	1795.38	1448.83	1645.47	1979.05	2464.82	1859.11	1519.76	2464.95	2462.35	1649.53	1783.62	2303.64	2875.86	1091.64	2324.6	1416.86	1200.66	1764.65	2112.85	1520.96	1938.4	2026.56	1712.65	2196.65	2116.05	1408.04	1655.51
Ssh3	4232.44	3738.96	3659.83	4753.88	3536.14	4038.98	3816.34	3977.72	4567.41	4661.65	4596.71	4799.35	4445.6	3851.24	3785.8	2860.87	3697.33	3504.68	3588.87	3203.1	4609.85	3901.14	3229.36	3947.68	3599.33	4595.12	4075.57	3986.83	4232.5	4277.28
Prdx3	22624.9	19251	22797.7	21904	23935.3	21902.5	20289.8	19505.1	22605.1	24121.5	24317.2	24027	26736.5	28161.1	19339.7	18742.4	23634.5	23126.4	20224.4	20116.3	24681.5	29123.7	22846	22382.9	22596.2	19977.3	14757.5	19655.6	17654.9	20669.3
Lamp2	53044.8	53308	48161.9	48748.7	50785.9	49471.2	54802.6	49082.9	53178.2	51910.8	58236.1	54845.7	50978.6	50033.9	54702.3	56392.1	48077	44387.1	70174.7	65473.2	52695.7	52146.1	42588.7	49480.8	50080	50371.2	49130.4	49150.5	54044.3	61887.5
Mtpap	1950.31	1175.75	1470.74	935.567	1090.32	982.763	1584.16	1298.13	1207.71	1244.91	1507.14	1534.78	1577.61	1074	1797.07	928.991	1619.51	909.468	1562.22	2466.36	1503.96	1329.03	1957.94	1870.96	1426.92	2025.76	1853.16	1463.8	1752.64	996.159
Scap	917.196	1519.33	NA	1165.49	1195.9	930.758	1094.22	862.583	1252.71	1231.55	1228.93	1299.04	1399.82	688.566	670.862	643.191	942.403	739.925	1697.35	NA	854.503	851.323	679.93	1188.6	1234.31	947.588	NA	982.313	1231.96	1306.52
Akr1b7	2457.3	2397.26	3192.93	2203.89	3944.06	4097.33	1990.87	2170.71	2111.79	3687.87	2399.42	3197.4	3142.14	4604.6	4770.99	3028.07	2578.15	3349.46	2026.49	2582.95	3340.39	4372.48	7101.3	4401.1	2523.78	2292.04	2773.87	2170.57	2711.73	2622.76
Gns	6907.4	7311.08	6116.39	7111.47	8144.25	7110.78	5812.34	6676.95	8569.53	8149.77	7096.42	7116.42	8633.58	8542.71	8542.39	6789.62	5451.12	4656.42	7604.2	5952	5848.53	6836.82	5316.59	5509.54	6448.21	6238.69	4599.18	5231.7	4547.44	6365.37
Oplah	22733.4	22035.2	23034.4	23867.9	21027.5	21896.9	21106.6	21717.5	19313	22097.9	21481.3	21823.4	20378.8	21204.8	19088.4	21029.5	23134.8	24843.9	30452.7	32024.6	30080.7	29662.2	28887.4	29261.4	33047.1	32515.6	32682	33630.4	32044.3	32214.6
Stx11	858.779	758.625	1047.49	1029.49	941.626	315.266	418.64	701.904	537.061	1067.27	1150.18	NA	866.99	1379.09	604.27	566.251	619.102	1187.16	390.201	734.881	1201.44	869.944	1376.03	1356.91	1283.49	665.001	897.908	1065.56	588.373	779.823
Syne1	12860.5	13054.2	13741.9	14464.9	14750.7	13445	11096.6	11362.7	12091.5	14635.3	11452.1	11882.7	13853.7	12849.3	10610.6	10221.1	13589.2	16020.6	18162.6	13436.5	12901	13077.9	15145.8	13727.9	12085.4	11585.3	12030.8	12353.5	12949.2	13724.8
Map3k4	3352.69	3507.67	3422.2	2801.7	3830.66	3672.74	2664.58	3368.9	3987.13	2691.91	2831.5	3462.69	3137.97	3251.37	3697.91	3284.3	4578.26	3083.63	3118.11	3393.15	3475.5	3150.31	3886.3	4223.66	3901.72	3916.23	3757.3	4757.81	3604.36	4385.7
Inpp5b	2853.46	3624.73	3579.93	3303.32	3293.34	3088.81	3862.51	3694.37	3221.33	3069.15	2806.05	2752.33	3325.29	3332.28	3199.44	3408.79	4169.05	3986.33	3016.15	3225.74	3993.83	3664.83	3169.1	3777.46	3039.64	3600.85	4404.72	3401.35	3394.5	3561.28
Hsd17b12	66544	70222.4	60556.3	67374.7	58262.8	65112.4	63189	61489.4	65874.9	65125	59822.5	59094.1	63344.9	56588	59769	61719.3	60323.7	68587.6	67884.6	64203	68194.7	67460.4	51094	51208.5	69556.4	66552.3	69236.1	67825.1	61976.5	56324.5
Xrcc5	6672.69	6808.32	7149.22	7469.06	6754.82	6301.84	7550.63	7793.14	5987.78	7382.32	9363.97	9633.38	6346.1	6768.6	9369.91	10868.8	8523.77	8066.54	7979.35	8569.51	8411.83	7709.48	6431.29	7390.85	10204.3	10465.1	7079.62	8308.1	9391.85	8604.74
Cnot1	8870.33	8536.56	8674.52	8385.16	7900.58	8372.38	7901.67	8395.02	8204	8246.79	7629.19	7985.15	8122.58	8102.23	7635.74	7078.93	6930.8	6804.88	7618.34	7621.4	7171.74	7251.64	6711.57	7108.36	7384.21	7443.99	7355.68	7484.66	7997.79	7954.16
Krt81;Krt86;Krt87	58490.4	45139.2	92575.1	97438.2	69414.6	64307.5	96598.6	131093	90707.5	122687	55086.1	34947.6	77368.6	50111.5	55277.9	48718.7	66373.7	86211.8	77157.9	85017.4	127755	94753	57641	38184	36760.5	26935.1	69435.3	64983	70103.6	68145
Rangap1	23188.7	25564.6	27050.1	26508.7	21928.4	24695.6	25424.3	25545.9	25597.3	24570.9	24077.4	22238.9	22987.7	21108.8	20948.9	18542.4	25543.2	25545.9	28103	26182.4	26936.5	24606.9	26208.8	27293.2	25465.8	24962.6	24543.5	25664.5	26767	25645.7
Gfod1	2076.19	1764.44	1373.59	1965.08	1663.09	2155.49	1949.25	1918.91	2059.59	2301.86	3553.04	2344.3	2017.34	2264.47	2802.72	2626.15	1788.52	1748.74	NA	2031.73	2152.4	2596.05	NA	1604.47	2377.75	2184.45	2202.84	1596.83	2568.54	2734.46
Elovl7	6285.8	5561.44	4975.64	8262.17	4380.58	6514.63	5876.77	8754.37	3537.5	7131.51	6636.83	11239.9	4449.52	7388.01	12955.7	20223.7	4481.57	9475.78	11420.8	9846.08	7557.68	8976.65	3826.48	3766.44	7960.87	8691.52	4551.04	7722.93	5848.7	8032.58
Hspa4	49547.1	48676.9	55333.6	52364.6	52947.7	51265.4	50815.2	49756.9	52246.3	50827.4	46591.2	46240.8	48279.5	46849.7	45217.4	39245.9	57728.8	58365.5	55502.8	59179.5	60524.5	55373.1	55834.4	59176.2	54684.6	53971	61331.8	53592.9	59920	55988.5
Ubxn1	13836.6	12998.5	16389.4	15166.7	17750.5	15231.6	17279.2	14659	15593.1	14812.9	11106.1	12139.8	14596.4	12964.4	16459.1	12350.4	11317.4	8228.92	11828.5	11077.3	12491.8	11914.9	13108.4	12111.2	12389.9	11346.5	10448.9	8681.48	16742.5	13918.3
Vamp7	6468.65	5187.67	4889.67	5885.13	4712.49	4854.37	5748.9	6319.2	4482.17	5312.16	5181.75	4268.6	5759.89	5181.78	4270.49	4687.43	5131.46	5444.38	4495.67	5212.59	5597.05	5225.82	5250.52	4908.76	4789.12	4202.65	4498.26	7393.54	6562.98	5957.66
Thbs4	23889.6	15046.3	15900.2	15324.7	13808.8	12835.7	14596.5	13508	17811.9	19719.8	12139	9505.76	14477.5	12474.6	9897.78	9306.7	19871.9	23273.6	18997	21080.7	10564.4	13674	10850.3	10213.4	19128.8	20802.9	12260.6	10749.2	14154.5	12745.8
Esd	43478.9	45558.1	42724.9	43224.4	48464.7	52343.3	39716.8	43409.1	49069.6	49565.2	43998	35576	58282.1	44850.1	29303.1	25745	36375.2	42372.5	42397.7	45060.7	50990.9	50784	43497.4	45720.9	32688.3	35949	44209.9	44479.4	42034.8	43068.3
Zscan26	NA	470.199	568.757	283.179	1017.99	465.22	640.256	642.415	809.386	NA	1094.86	624.352	879.541	632.472	1064.64	482.477	1873.04	542.113	NA	390.198	NA	397.064	NA	414.749	NA	NA	NA	336.712	NA	342.617
Tollip	19279	22459.2	23528.2	23925	21401.7	21527	22540.8	24709.3	20421.8	23858.5	22038.9	24599.6	21121.9	25291	18288.1	18149.9	18997.9	20673.6	25720.3	22365.9	25655	24392.7	18692.3	20855	21055	23917.7	23124.5	24778.5	26201.1	27569
Sec61a2	896.984	1281.46	466.945	404.526	873.316	709.501	531.58	956.806	247.215	1135.78	683.772	670.603	1024.38	586.043	204.271	636.051	797.91	278.035	NA	NA	618.784	847.52	NA	569.513	NA	334.147	424.439	NA	NA	476.679
Sec61a1	48387.2	46603.9	36131.4	43972.1	47054.3	49933.1	42425.1	48839.2	42157	45482.9	29963	34927	40426.7	44001.1	33916.8	31521.4	39212.5	37087.9	29301.7	38104.9	37765	41524.7	40780.1	37695.2	40707.7	43882.4	28901.1	38205.2	28367.9	30923.9
Msn	108892	111417	118299	111950	128615	134371	102409	101168	107577	105705	104663	103193	111340	114955	78024.5	74602.9	137288	129962	116336	117779	122770	123037	140847	132407	112937	108950	124219	118294	117385	118564
G3bp2	9469.06	7569.06	7349.47	8919.12	8106.52	8266.43	6599.21	9130.74	7419.92	7277.74	8400.88	8730.79	7875.98	7063.26	9213.56	8612.01	5820.74	6026.2	6152.41	5285.88	6681.44	8018.42	5011.13	5731.1	7878.29	7315.95	5154.94	6264.16	5811.59	8711.08
Numb;Numbl	1509.29	2367.24	1922.51	3013.67	3102.68	2759.1	2166.09	2374.1	1935.94	3501.66	2502.7	2533.78	1239.84	2574.4	3459.38	3759.56	1570.52	2848.48	1980.02	1987.21	1923.64	2698.41	1235.38	1597.39	1391.71	1778.65	1589.18	2674.54	2432.73	1022.36
Nfix	10377.6	8533.37	11775.6	10794.9	11472	9418.33	11912.5	11227.2	11653.5	11697.4	7931.84	9165.01	12036.9	10194.9	8295.79	6755.41	16429.3	13068	8626.38	7595.74	6578.99	8411.86	10340.3	10454.2	11332	8335.13	12325.6	10038	9926.16	8426.31
Srsf7	43502.3	55208.4	37325	49217	40285.3	52355.1	39012.1	50981.1	47001.4	57283.4	68424.6	64027.6	49772.6	51225.9	85174	91766.8	42556.1	47488.7	39066.8	39435.3	39913	49929.8	45261.5	44522.3	50988.2	53072.3	46957.1	54419	52105.5	56274.1
Smg1	2100.42	2216.76	1724.16	2023.08	1598.33	1937.92	2017.11	1934.96	1831.44	2004.9	1890.83	1803.64	2058.68	1622.3	1375.85	1600.66	2133.58	2176.96	2425.27	1967.95	1930.18	1607.41	2307.39	2060.27	2329.31	2220.38	2349.68	2256.55	1931.22	2461.4
Naa20	2346.89	1791.27	2454.34	2400.92	1558.6	1962.46	1762.71	2197.38	2472.12	2324.12	1845.75	1896.38	2261.2	2072.44	3019.09	3231.45	1331.32	1665.16	2603.01	2127.26	3009.62	2084.83	1325.84	1710.09	2374.12	2558.78	1066.56	1729.71	1866.5	2807.58
Clasp2	4725.5	4711.72	5270.85	4705.88	5360.49	4447.06	5538.8	4973.77	4893.14	4476.42	4497.59	4349.41	4262.84	4760.32	4633.08	4851.52	4926.35	4382.19	3697.75	4234.29	4984.95	4699.67	3647.53	4652.74	5030.1	4595.85	4902.96	5072.91	4911.55	4704.6
Eogt	3227.95	3189.01	3114.97	2647.35	2855.1	3055.57	2516.06	2040.7	2820.73	3062.27	2534.97	1870.07	3285.77	2966.85	4341.21	3373.54	2073.71	2488.5	2116.19	1514.71	2369.39	1848.34	2630.87	1912.22	3425.3	2147.08	2324.88	2123.12	3022.03	2539.46
Atg2b	1773.77	1733.57	1967.59	1932.8	1758.88	2064.58	1965.96	2178.95	1693.24	1916.16	1832.15	1937.74	1829.2	2046.69	1963.17	2127.89	1662.38	1649.27	2387.09	1917.84	2427.43	1617.6	2104.64	1867.28	1674.79	2197.35	1907.19	1859.3	2013.39	2279.1
Add3	23234.4	21311.1	21525	21635.1	24482.9	24793.9	21256	22020.9	26141.4	25936.8	21228.9	20762.8	26006.1	25525	13861.8	11408.3	22484.9	23033.6	17113.2	15172.4	16242.7	16300.5	25446.9	25607.8	21197	21045.6	22877.1	23187.3	20750.9	22246.7
Tgfbrap1	2013.95	1435.43	1594.15	1325.49	1024.98	1256.98	1433.57	1681.72	1281.19	1660.43	1209.27	1509.99	1740.34	1328.31	1592.12	1144.46	1170.18	1639.49	1969.36	1771.54	1493.56	1436.1	1387.58	1639.15	1157.13	1992.22	1617.5	1767.67	2071.14	1501.5
Rgl2	3177.44	2430.13	2457.71	2268.1	2140.32	2823.45	2308.17	2736.33	2155.81	2540.5	2648.28	1670.09	2114.81	2440.63	2225.26	2490.36	2122.63	1696.06	3154.57	2849.24	1777.01	2444.5	1455.08	2427.37	2341.06	2072.29	3091.58	1938.24	1554.99	2169.12
Ano10	4845.66	4950.26	5894.54	5405.16	4883.39	5254.6	5105.74	6144.69	5628.86	5230.61	4950.47	4520.39	5967.72	6083.19	3790.37	3460.68	5733.81	6899.56	4409.92	3717.45	6153.28	6362.88	6337.37	5850.76	5267.95	5085.38	5873.28	6187.42	4393.32	5316.57
Tfrc	5833.45	5934.74	5612.66	6271.64	6189.58	6316.37	6027.42	6823.44	7027.02	7337	7262.26	8102.44	7391.73	7766.12	7879.64	7718.29	6269.89	6614.73	6725.52	6620.74	9274.65	8521.86	7256.72	7398.27	6517.08	6346.17	6491.4	6640.75	6398.23	6373.51
RtcA	5446.02	4587.23	4387.15	5752.19	4805.75	5653.03	5158.48	5255.01	4841.26	5967.03	4998.19	7380.9	6381.8	6961.72	3782.5	5759.44	3980.72	5152.98	3163.43	5342.01	5108.94	5730.05	5109.38	3178.12	4615.34	5046.48	4536.45	4991.36	3973.19	5432.55
Acp7	11270.6	9198.12	11385.4	11927.8	8449.45	7230.8	17720.9	17364.5	16706.1	16123.5	20363.1	23091.5	21317.7	21195.5	14287.7	15381.9	11850	10687.1	13656.2	11874.7	17716	17872.2	10687.2	11878.3	16208	15550.2	19100.7	19162.3	15455.1	16354
Slc12a9	2567.23	2482.39	2875.47	1973.61	3189.17	2285.97	2877.27	2158.32	2446.8	3132.87	2483.29	3171.79	2810.65	2734.73	2861.58	3083.3	2647.8	1932.57	1835.95	1488.31	1830.72	1202.88	2314.08	1899.73	2502.24	2255.93	2704.99	2145.71	3062.02	2762.84
Pgm3	14861.3	13696.1	13930.2	14771.7	19441.1	19644.7	13141.8	12346.7	17975.4	15317.5	13722.7	12003.2	18263.5	17660.4	9863.48	10249.8	13804.1	12989.2	13638.4	11213.7	13029.1	12240.2	9237.85	8795.47	10356	8664.54	14377.4	14602.4	12826.9	12728.1
Abr	10165.5	8675.46	9038.12	7757.31	7048.57	8551.04	8050.07	7465.84	7261.85	7457.24	6945.78	7686.04	8854.96	7710.4	6799.46	7237.61	7064.01	9714.3	9253.13	7551.19	8241.44	7765.91	8316.05	8717.36	8675.62	8529.98	9058.85	7920.07	7425.84	9570.06
Acadl	30739.9	23940	27632.8	26339.9	34954.3	34469.7	29634.7	29703.8	39556.2	35360.1	31266.6	28488.6	35137.1	35752.8	23346	21286.8	28020.4	29362.9	21824.3	22015	40590.9	35648.8	31940.8	29617.3	29251.3	29630.6	31206.8	26920.2	29244.1	31126.5
C1qbp	17167.4	24350.3	28746.8	23944.7	26641.6	25802.4	22570.6	24689.8	21071.2	25170.1	13383.3	19069.7	19673.8	24697.4	15666	15950.1	36827.3	44821.7	33241.7	32460.9	28686.7	25252.7	25622.5	28798.6	25231.2	19677	25163.9	23073.5	28424.9	36091.3
[truncated: 7,140 more rows]

## Sheet: Skin_DifferentialAnalysis
	q value				log2FC
Gene Name	Skin_Fe4w/Skin_Fe14w	Skin_Ma4w/Skin_Ma14w	Skin_Ma4w/Skin_Fe4w	Skin_Ma14w/Skin_Fe14w	Skin_Fe4w/Skin_Fe14w	Skin_Ma4w/Skin_Ma14w	Skin_Ma4w/Skin_Fe4w	Skin_Ma14w/Skin_Fe14w
[truncated: 6,983 more rows]

## Sheet: Age-Dependent_46CommonDEPs
	q value		log2FC				Cut-offs	q value ≤ 0.05
[truncated: 47 more rows]

[truncated: 5 more sheets: Age-Dependent_188UniqueDEPs_Fe, Age-Dependent_48UniqueDEPs_Ma, Sex-Dependent_10CommonDEPs, Sex-Dependent_16UniqueDEPs_4w, Sex-Dependent_32UniqueDEPs_14w]
