# Supplementary material for: Deep proteome profiling reveals signatures of age and sex differences in paw skin and sciatic nerve of naïve mice
Source: eLife. 2022 Nov 30;11:e81431. doi: 10.7554/eLife.81431 (PMC9711526; doi:10.7554/eLife.81431)
Supplement: Figure 1—source data 2. — DEPs from age- and sex-dependent comparisons are listed in separated sheets. [file elife-81431-fig1-data2.xlsx]

## Sheet: SCN_RawIntensity
Violet label	protein IDs quantified in all samples
	SCN_Ma4w								SCN_Fe4w						SCN_Ma14w								SCN_Fe14w
Gene Name	SCN-Ma4w1-1	SCN-Ma4w1-2	SCN-Ma4w2-1	SCN-Ma4w2-2	SCN-Ma4w3-1	SCN-Ma4w3-2	SCN-Ma4w4-1	SCN-Ma4w4-2	SCN-Fe4w1-1	SCN-Fe4w1-2	SCN-Fe4w2-1	SCN-Fe4w2-2	SCN-Fe4w3-1	SCN-Fe4w3-2	SCN-Ma14w1-1	SCN-Ma14w1-2	SCN-Ma14w2-1	SCN-Ma14w2-2	SCN-Ma14w3-1	SCN-Ma14w3-2	SCN-Ma14w4-1	SCN-Ma14w4-2	SCN-Fe14w1-1	SCN-Fe14w1-2	SCN-Fe14w2-1	SCN-Fe14w2-2	SCN-Fe14w3-1	SCN-Fe14w3-2	SCN-Fe14w4-1	SCN-Fe14w4-2
Slc12a2	19432.5	20939.8	21323.5	22164.3	21050.5	22435.3	19794.5	21279.5	22837.5	22493.4	19844.4	21096.9	20792.3	22030.5	25411.8	26575.5	27519.2	28374.1	25543.6	25912.5	29121.2	28041.8	26157.9	27699.4	27522.5	27034.8	26012	23276.4	26289.9	26347.4
Sgcb	39988.3	40416.7	38299	39357.7	38117.8	43896	42100.2	41519.7	41784.4	42236.7	42981.4	50754.6	37793.3	40117.9	51143.4	49690.2	51817.3	57287.6	47919.7	50196	52337.7	53632	49276.7	57624.1	53670.3	48384.9	50295	51104.9	53799.5	57177.1
Ubr3	3301.37	3488.67	2974.73	3743.66	3865.08	3781.13	2949.33	3741.49	3455.2	3331.6	3289.72	3395.02	2985.6	3451.7	2677.39	3417.11	2668.96	3778.97	2907.75	3415.39	2655.37	2839.07	2684.56	3121.68	3300.31	3410.22	2985.58	3646.68	3415.91	2841.32
Ipo9	7372.2	7350.07	7036.31	6268.98	8361.31	7051.93	6966.56	7434.88	6909.01	6840.72	6325.09	7427.81	6757.31	7652.53	5634.21	4976.26	5274.6	5637.49	4702.14	4677.48	5582.65	5075.2	5932.58	6103	5748.54	5958.32	5462.56	4757.75	5458.18	4591.44
Mapk1	107183	108435	105984	98190.2	104969	96110.9	100707	97835.3	104081	102678	98776.5	99344.1	91407.4	93446.1	102260	98513.6	100920	102108	91261.4	89604.5	88082.4	95175.6	107904	106031	96740.6	104427	103032	93627.1	98621.6	101401
Mapk3	163224	152560	161201	144162	143481	150715	146563	140621	148513	146723	143741	142607	134266	149256	186379	169862	179424	188779	166357	157943	192896	188915	212457	202569	199636	187828	179489	170475	178147	194667
Trim32	5457.21	6402.74	5549.59	8322.86	7793.5	7436.33	6258.23	6910.83	9186.09	7578.46	9138.83	7145.08	9745.91	9143	3787.42	9138.63	6242.06	5045.12	5713.37	5998.21	6883.72	4997.41	6206.27	5346.19	5084.81	5293.87	5865.95	6246.63	6470.13	5827.42
Ipo5	10347.9	10809	10927.2	11317.3	11003.2	11092.7	11673.2	11451.8	11159.1	11183.6	11550.7	12320.5	11148.4	11146.6	11724.3	11743.3	9216.13	9545.4	9670.36	9211.64	9048.09	8766.84	9690.33	9420.12	10569.7	11067.6	10368.8	11344.7	9549.57	10352.9
Sugt1	48247.7	48015.8	54743.3	41430.9	52185.4	46296.1	46652.1	46499.5	49878.6	51190.8	48199.7	47534.7	48733.5	46386	52918	51329.7	49328.5	51449.7	58546.4	46095	49064.9	50322.1	55543	49006.7	57789.6	63380.6	58256.5	50742.7	55518.6	56170.6
Ccz1	3207.86	3981.08	3483.23	3408.76	3653.41	3756.69	3805.35	3914.1	3704.68	3615.66	3909.9	3662.02	2649.84	3282.5	3837	3751.87	3661.99	2933.5	3875.43	2725.08	3850.24	4596.47	3715.82	3468.52	3963.57	4634.79	4180.95	3824.54	4539.13	3511.91
Get4	8218.3	5385.7	7566.39	8064.02	7754.75	8439.55	7546.85	8913.68	8336.15	8447.48	10223.7	8307.47	9238.6	9451.12	8719.84	8663.95	8294.49	8367.05	7521.64	6365.99	8252.56	7050.68	9092.55	7177.85	6743.92	8797.82	5993.9	8589.27	8579.99	7690.49
Hacd2	2992.96	2368.48	2360.58	2224.47	2050.52	1725.4	2320.72	3452.51	2048.29	2657.37	2686.11	2638.49	NA	1692.41	3549.67	2003.86	2616.27	2612	2529.45	3057.72	3234.46	2133.78	2123.48	2976.31	3315.87	1936.02	2852.2	2131.47	3150.39	2979.39
Carm1	6405.59	5542.14	6107.54	5418.19	7088.1	5800.43	8267.46	5602.24	6539.38	5622.64	6362.09	5376.89	5743.04	5942.39	5629.03	5782.38	6369.23	5048.86	5562.56	4474.87	5753.02	3897.49	5673.64	4848.99	5072.67	6861.05	6599.71	5111.6	5640.86	5755.62
Bloc1s2	1574.85	596.207	933.862	1963.48	1128.17	857.685	1474.07	2144.89	1226.29	1190.13	953.888	1378.06	NA	NA	NA	NA	NA	NA	1215.96	1743.57	NA	1004.19	527.612	1473.58	1746.29	NA	NA	936.536	1381.58	996.683
Ddx20	NA	538.65	837.594	1162.97	1556.43	1512.7	1017.59	984.638	775.061	976.754	598.054	1225.82	NA	668.089	NA	1197.56	1028.94	821.395	881.452	717.962	685.728	NA	NA	416.405	553.843	440.621	1240.78	1563.65	1028.62	1255.01
Uap1l1	33779.1	32756.1	28181.5	27753.4	32090.9	33081	32180.8	29766.4	33611.8	32892.8	33638.1	30564.1	31921.5	35208.1	37667.2	37440.1	39215.6	34816.9	36203.1	36721	39317.9	35723.2	39378.6	36451	36451.2	34330.2	34637	33955.7	36871.3	38553.7
Sltm	4797.97	4034.78	4486.86	3986.85	3798.93	3767.02	4305.19	4443.17	4217.49	4226.09	3420.67	3224.35	4295.84	3328.17	2596.56	4135.02	2305.74	1911.27	3494.42	2980.18	2376.27	3427.34	2782	2889.37	2839.47	3062.61	2741.51	4119.65	3672.02	2642.88
Lrrc47	13059.1	13530.9	13250.1	12035.5	13444.8	14036.3	13829.4	12677.9	13045.1	11995.9	14204.7	12863	14399.4	15397.6	11411.7	10921.5	11978	11677.6	11736.6	9880.66	11436.5	12108.5	12764.9	10447.5	12637.4	12827.9	11820	11100.1	12106.8	10577.2
Pdcd2	912.414	1962.47	1196.42	1532.71	1297.31	1882.13	1878.98	2626.64	1388.89	2042.87	1199.63	1488.49	3085.41	1825.12	1622.38	1595.45	626.186	1681.19	2536.08	1633.68	735.544	1662.97	1783	1953.09	1499.32	1447.62	1661.65	2026.87	1952.02	2315.54
Eps15	7191.01	7247.23	6266.88	6886.76	7293.47	7198.17	5761.2	5974.38	6729.55	6777.2	6396.38	6472.51	5625.22	6597.17	5119.99	6219.52	5088.32	6093.61	5663.22	6012.62	6718.55	6720.4	6007.72	5911.9	6292.56	6707.36	5743.4	6164.37	5907.56	6023.52
Samd1	2038.18	1979.64	1677.87	3027.69	1797.58	2549.34	2851.8	NA	1977.47	2222.98	1618.5	NA	NA	1851.2	NA	1810.48	NA	NA	2440.53	2259.2	NA	3223.85	NA	NA	2266.88	1507.87	NA	1910.58	2516.62	2179.98
Mrps7	961.601	1071.45	781.748	963.603	941.318	1333.47	1014.79	1167.82	610.37	1100.18	1264.29	1193.77	718.348	675.206	747.091	766.227	774.133	703.391	770.987	846.701	678.773	636.25	925.331	905.225	666.38	603.998	1017.29	1032.63	718.474	690.752
Cry2	NA	243.881	279.536	434.644	429.581	NA	NA	NA	659.588	382.985	NA	195.619	NA	NA	NA	NA	347.902	NA	346.823	642.019	NA	744.351	NA	NA	NA	222.653	NA	NA	NA	NA
Psmd11	27087.3	26679.8	30824.6	32205.5	29827.8	28755	28955.7	29610.1	29490.2	28713	29344	28472.7	25827.3	29502.6	22127.3	21188.1	22444.6	20638.9	22085.9	22191.4	20322.4	20811.2	18279.5	19789.6	17979.9	21264.9	22453.2	22026.6	20376.8	21643.4
Thoc2	2338.4	3544.36	3114.73	3128.06	3171.33	3027.86	3374.55	2861.55	2997.98	3097.92	2934.76	3114.58	3175.37	3338.98	2253.61	2453.23	1471.63	1808.85	2452.83	2449.13	1549.24	2230.29	1929.53	1864.4	1878.11	2527.4	1749.01	2510.38	2292.74	2245.65
Sacm1l	68488.9	78654.5	76180.4	74909.3	75232	77885.4	75682	75992.9	74089.1	77350.5	79418.6	81129.9	64028.2	71483.6	73846.4	76368.9	73047.9	80536.7	76336.7	76720.4	69185.3	74829.8	69300.9	76442.9	75208.7	71521.1	64401.3	75056	69125	71322
Psmg4	1136.29	1357.79	1075.25	1548.18	1103.21	706.146	1946.65	309.03	1032.39	969.04	771.207	1453.37	NA	797.472	2331.89	1270.49	401.182	655.334	877.24	813.59	429.703	917.776	617.462	NA	615.814	NA	502.46	1123.84	NA	NA
Ttn	2995.95	4277.15	4268.01	4430.45	56230	56975.3	9547.02	9987.02	90307.6	90752.1	150418	151876	4173.84	3850.74	90857.1	90951.8	125526	125091	224609	217919	25587.3	25344.4	NA	5603.79	48179.8	50265.3	311062	299038	137381	140007
Mical1	50421.4	50163.1	51802.1	49051.5	51800.5	51630.7	50146.1	48674.5	49342.2	51441.5	44775.6	46464.1	41792.6	46232.4	35093.4	36774	33438.5	32957.7	30795.5	32482.4	33987.4	35671.9	36546	38077.6	37666.8	34782.5	30272.3	32170.6	32425.4	32970.4
Zfpl1	3906.61	3359.03	4101.15	3449.01	3179.95	3646.03	3977.72	4171.58	4113.37	3691	3760.91	3856.7	3795.38	4890.43	2048.13	2046.72	2213.81	1847.47	1434.89	2375.28	2233.27	2188.2	2308.56	2920.19	2302.45	2691.01	2458.29	2228.85	1436.12	1248.76
Elp4	2671.06	2674.05	2734.56	2949.88	2914.55	2643.3	2799.68	2988.13	3171.13	3440.14	2994	2192.55	2812.4	3241.85	2136.08	2730.55	2645.57	2268.55	2211.3	2372.98	2169.31	2578.48	1857.57	2737.53	2270.23	2870.76	2772.44	2830.86	3211.61	2146.85
Edc4	8886.67	8767.27	8278.07	10023	9279.28	9788.98	9655.07	9869.18	8412.31	9575.57	8852.6	8534.22	8322	9053.24	6441.53	6941.79	4919.17	6672.12	5806.26	6252.65	6409.95	6295.83	5741.97	5559.65	6336.45	6035.64	5563.66	6245.69	6256.23	6404.97
Inppl1	2642.44	2204.74	2736	2315.66	2302.07	2633.62	2647.3	2730.22	2462.98	2806.26	2758.13	2509.86	2401.89	2443.6	2053.54	2042.62	2689.07	2470.1	2549.88	2541.67	2279.52	2215.24	1677.57	1662.86	2314.91	1573.83	1930.21	2427.78	2036.46	2112.83
Septin6	5748.53	6573.92	7744.29	6219.89	7041.7	7726.39	6713.47	6468.58	7886.82	6553.37	5332.54	6820.83	8187.35	7368.21	6903.32	6763.23	7296.2	8456.31	7459.4	8029.84	8288.97	7506.92	7387.72	6744.86	7787.68	6773.08	6133.52	7752.61	8269.38	7808.95
Krt75	4133.4	4242.74	1507.73	1366.95	1022.24	1095.72	4601.26	4609.01	NA	NA	1179.19	1524.2	2888.46	2977.42	3011.41	3042.11	NA	NA	NA	NA	1000.15	NA	1003.57	1532.73	4189.47	4350.95	2808.92	2282.16	5071.88	5199.94
Nckipsd	4242.22	4132.7	4735.46	4571.04	5236.48	4515.48	3628.95	3972.02	4405.25	4504.3	3656.82	4408.67	3915.71	4366.57	7228.73	5853.4	6592.15	6567.65	6023.1	5494.26	6293.45	5946.55	6323.93	6270.72	6259.22	6629.67	5367.65	6425.72	6651.02	4930.39
Fh	48422.8	50196.3	46266	43262.4	49035.2	44663.4	44317.9	42480.3	54687	52847.4	56891.4	57762.6	43019.4	49118.2	55578.1	54211.2	55726.7	56159.7	70232.3	70938.3	49309.1	50564.9	46378.1	44897.2	48367.9	47795	66091.2	57613	59456	57738.6
Tpbgl	302.921	325.361	NA	507.815	640.962	573.548	368.273	272.73	376.967	849.094	527.428	353.298	858.637	747.884	NA	626.563	35.9433	NA	624.166	573.33	248.749	625.363	NA	181.84	547.945	785.103	312.132	528.628	491.341	359.839
Tln1	75862.1	72554.2	76697.6	70919.7	67873.2	69797	74191.2	74045.7	72733.4	71615.2	77544.7	77995.3	74478.4	77798.4	94626.4	88566.6	86351.5	87443.2	82407	76909.6	88655.4	86289.3	86195.1	86990.6	82101	77879	83964.5	79386.6	81773.4	85307.6
Tomm70	25030.1	25833.4	26405.2	25940.1	26205.5	25529.5	27419.4	26673.5	28431.2	27208.1	27363.5	28262.7	26480.9	27786	26852	26184.7	31845	28180.3	27653.6	27148.9	29900.4	27731.1	27105.9	28240.1	25846.5	26199.8	26247	24756.9	25637.8	26150.6
Arid1b	2186.72	2504.03	1889.53	2428	1966.02	2382.89	2302.39	2182.34	2631.55	2222.48	1703.49	2509.13	1780.75	2221.43	1912.94	2816.27	1881.14	2035.35	1415.29	1938.81	1856.74	2922.32	1578.68	1931.41	1631.89	2451.49	2499.26	2264.46	2037.12	1377.89
Pigs	2218.75	1933.34	2134.9	1861.5	2124.34	1996.45	2362.99	2387.08	1992.36	1925.7	2069.55	1819.25	2464.51	1950.67	1883.2	1868.7	1636.27	1430.05	1989.88	1994.67	2184.89	1967.95	1557.96	1144.4	1799.03	1686.41	1813.43	1799.81	1822.24	1927.25
Efhd1	14114.5	12968.3	13271.1	15297.4	14213.1	14669.7	12859.9	12026	14859.7	15109.1	13283.8	13409.8	13580.4	12529.2	6591.54	8630.42	7882	6289.19	5547.53	8482.72	6550.51	8299.98	7770.04	8415.74	7193.62	8663.17	7710.29	7563.41	7776.18	7967.05
Rab21	36226	40048.8	38643.8	35100.2	34576.6	38466.7	36532.6	35691.2	36654.6	36667.7	36692.2	38370.8	30451.5	33631.7	42646.4	37842.4	37304.8	36375.9	40430.2	38179.9	36881.8	40136.7	39516.7	43035.4	38519.6	36860.3	39858.1	40915	38585.6	36598.9
Snapin	1886.67	2040.45	1520.75	1869.54	1361.2	2114.67	2026.29	1961.73	2195.48	2518.6	1459.52	2439.14	1555.66	1547.67	1603.42	2383.69	1069.57	1517.88	1622.88	2494.2	2817.58	2371.28	1677.88	2441.43	1615.25	2235.52	1223.89	1614.13	2468.7	2861.2
Acbd6	3149.17	3317.44	3871.16	3799.59	2755.88	3167.87	3094.33	3627.92	3628.59	3236.31	3537.97	3031.93	3424.47	3277.83	4439.54	4001.74	4637.71	3622.41	3559.91	3404.78	3848.39	3988.42	5191.23	4039.51	4350.85	3784.02	4179.23	4799.56	5302.11	5051.94
Sema7a	2925.04	3283.7	2557.62	3313.51	2494.86	3421.48	2960.38	3126.37	2730.79	2948.16	2670.2	3135.87	3087.11	2436	4299.44	4997.67	4003.53	3729.08	3195.57	4746.18	3771.89	3519.31	4425.16	4461.77	4882.71	4095.44	3515.14	3239.32	3683.93	3287.38
Postn	196341	193101	191245	168119	171461	165739	190535	176218	200946	185737	177592	171961	162873	166762	86938.3	85334.1	105038	100512	85951.4	80349.4	95414.3	93088.6	118267	118682	119809	123265	122236	118724	116342	112429
Aoc3	37517.8	38162.6	29526.5	30902.8	18378.2	20123.7	36175.5	36091.4	20058.7	22183.3	32505.8	33237.5	25296.5	22290.4	56624.1	48037.6	40609.8	44460.8	58778.5	55128.4	42497	36306.6	44452.9	45594.4	35375.2	35491.6	51241.7	46980.4	54037.8	55460.9
Ckap5	15321.6	15677.2	15962.9	16668.2	16119.6	16434.5	15974	16295.8	16596	15925.4	15056.3	15173.2	14309.5	15150.7	13907.2	14406.8	13696.2	13792.5	12419.5	12404.4	13568.2	14208.3	12212.7	13728.9	13237.4	14144.5	12904.1	13466.5	13450.9	12978.9
Stip1	126467	115726	125463	110497	119455	110242	119230	116851	124951	121540	122738	122931	115244	117833	161778	146300	155001	145637	143495	132911	147260	148504	139930	146972	150267	141342	137243	129211	139819	139128
Tsc1	797.519	727.213	764.464	974.443	779.945	1145.15	904.582	906.264	961.327	756.45	670.391	947.268	1124.72	799.644	414.665	708.435	894.628	811.331	892.211	575.389	949.832	904.113	521.701	518.867	809.252	802.865	777.842	924.556	742.886	582.133
Ank3	26118.9	26689	29518.4	29753.7	27445.7	28933.4	27897.1	28673.6	27437.9	30507.9	27141.7	27621.7	26854.6	26873.6	29492.1	32153.6	32220.5	33294.1	28269.8	31175.9	31532.3	31428.4	33127.3	34045.9	31370.1	31833.8	29257.6	31536.6	29846.2	30577.1
Efnb1	7849.52	7584.31	7058.71	8092.39	8115.08	7736.35	8571.07	9584.5	9254.61	8616.1	8324.08	8375.2	7877.97	6682.28	6325.53	6723.86	7478.98	7603.04	5888.88	8200.92	7046.21	5983.46	7195.8	8298.94	7108.61	6760.18	5904.2	7927.02	7179.6	7009.97
Ctnnd1	59994	52930.1	60123.5	54440.3	56377	53660.4	54288.6	57315.6	57495.6	55514.2	54966.3	56599.8	56720	57072.3	66061.5	67190.6	63456	61680.1	58385.6	54444.6	58712.2	57386.8	62676.4	61988.1	68766.3	65885.1	61776.5	61284.6	63070.4	68701.4
Rbx1	17226.8	15905.1	16347.3	20003.9	17544.3	21934.7	19145.2	19006.5	20637.1	21502.7	24610.5	22438.3	19502.3	17500.3	22811.8	20115	23127	20516.8	17344.3	21881	21590.5	16945.1	20096	19863.5	20310.4	18650.8	19622.8	20221.9	18977	20543.8
Chchd3	37272.2	35802.4	39733.1	42886.2	37126.7	39522.8	42759.7	41290.8	42520.4	42289.5	47743.2	48672.3	38357	37275.5	45613.7	46971.4	46839.3	49091.7	59272.7	56170.2	38173	43946.7	39629.6	39097.7	44548.7	45738.7	55581.3	54817.9	44232.1	51492.7
Eef1g	102248	92700.2	96621.3	83303.6	91134.8	86309.3	103626	93392.9	97643.1	94829.3	102639	96775.9	81038.8	89257.9	59494.4	57579.9	59473.3	58679.2	62647.6	60882.8	58665.3	56172.8	53900.4	59238	59231.2	61340.6	66098.5	55187.3	64349.2	64216
Rabep2	5201.85	5408.2	5155.74	5056.05	5966.73	5710.38	4538.71	5536.9	5125.14	6284.14	4783.23	4911.5	5153.71	5351.81	4054.81	4535.55	4669.06	4538.06	4229.06	4152.86	4944.31	4528.32	3860.68	4280.04	4140.22	5157.06	4094.33	4485.46	5164.89	4206.33
Cox20	1959.92	1635.61	1373.95	1457.2	1736.37	1485.57	2045.11	1429.6	1400.91	1231.15	1938.23	1917.62	2322.72	2046.32	1558.09	1108.82	2365.6	840.882	2070.36	1897.93	1918.59	1349.9	732.461	636.75	1331.88	1716.29	2619.44	2054.56	2787.15	1336.2
Inpp5a	9022.79	9741.23	7213	8280.21	9825.83	8951.82	8425.36	8970.28	8986.54	8090.9	10370.2	9663.34	8288.99	9459.75	9696.75	10904.7	10818.6	10394.1	10150.3	9384.94	9600.42	9485.66	10392.3	9096.76	10099	10263.9	8030.45	9044.96	10241.2	9162.91
Polr1c	4498.94	4881.86	4828.71	4052.31	4636.23	5500.93	3561.16	6167.39	5056.36	5294.81	6202.06	4547.22	5174.9	4564.4	4447.2	4552.41	3463.76	4921.17	3776.72	5174.99	5027.24	5861.01	4062.8	5002.61	5461.96	4586.52	4853.17	3218.22	5344.99	3913.72
Copb1	20739.4	19645.1	20354.4	18419.2	20965.9	19552.3	21321.1	20102.2	19622.6	18959.8	18011.5	19499.7	18006.4	18609.3	10086.3	10288.8	10621.6	10031.6	10068	10285.3	11133.2	11230.6	10237.1	9303.8	10785.2	11491.5	10804.6	10094.4	10736.4	10654.5
Nol7	1498.51	2884.6	2447.23	3391.02	3534.07	2243.56	1981.58	2508.95	2070.02	1757.59	2257.84	3738.98	3498.9	2294.6	NA	3747.25	1292.14	1635.68	2643.63	1726.72	3583.3	839.617	2496.82	1448.91	2891.91	2847.16	1557.46	3310.04	2609.37	2059.2
Golga2	6999.39	6336.88	6375.06	7123.63	7048.7	6776.5	6427.42	7659.22	7579.34	6980.39	5269.04	5265.02	6290.7	5927.83	3835.6	3886.4	2858.79	3348.18	2723.73	3776.19	3104.8	3364.71	3107.03	3566.23	3645.04	3696.26	3405.38	3488.83	4008.95	3113.63
Septin11	96287.9	82051.1	100594	94180.9	87870.5	91667.1	81832.1	86766.6	86468	87450.9	84035.3	89623.6	76444.6	83482.1	84786.6	95251.1	76099.1	77906.2	74961.1	76914.2	76388.1	78368.8	86392	87709.2	83443	87074.6	78489.5	77698	74535	85006.1
Pnp	60342.6	61371	55743.2	58155.3	41018.3	39125.2	54530.8	45641.8	43334.6	42506.3	57440.4	55461.5	49337	49175.7	66747	66176.9	44554.9	45430.1	53536	51228.2	44814.5	45185.2	54781.5	54181.1	62664.3	65390.8	64163.4	66681.4	71457.2	63578.4
Ttc4	13792.1	11732.5	11929.8	8447.27	9533.72	14126.7	9080.67	9991.87	8959.93	12201.1	12674.2	12560.7	4896.88	9846.46	10678.9	11778	6894.32	9421.97	7404.05	12126	8780.42	12417.4	7418.03	12079.1	11875.3	10949.1	10081.4	8521.29	12320.4	7408.22
Rab3gap2	4303.65	4496.32	4006.59	4917.42	4428.56	4338.17	4562.83	5008.23	4967.59	4846.57	4782.87	3977.33	4864.84	4812.84	4837.22	4804.27	4492.9	4398.49	4688.14	4535.17	4548.82	5197	4872.43	4508.53	4595.22	5000.63	4455.6	4516.76	4566.41	4732.63
Itm2c	2362.54	2527.88	2784.91	2585.03	3088.27	2398	2297.2	2324.71	2742	2533.27	2238.71	2099.95	1588.2	2029.68	2302.19	1629.25	1834.87	1546.66	1734.41	1848.8	2913.8	1732.15	2079.39	1823.47	1840.93	1698.5	1466.58	1190.73	1247.05	1267.32
Ryr1	NA	876.417	NA	825.621	5216.84	5109.16	1368.84	1230.87	9695.47	9168.38	14409	14914.3	736.318	686.036	7440.34	8352.6	9321.65	10214.5	24290.5	24956.6	2387.83	1935.15	NA	NA	4606.86	4515.23	29179.9	29883.5	16192.5	15713.9
Arap1	13601.3	13495.1	11895.2	10500.4	13197	13533.6	10767.4	11849.3	12025.4	11683.3	11648.8	12021.8	12714.2	11526.3	10162.7	10803.6	10724.5	9860.19	11981.5	11494	13017.5	11548.4	10341.2	9786.86	10179.8	10671.3	9669.95	10286	10124.6	11691.6
Pdha1	103539	95790.2	99923.2	103494	102376	96867.9	102018	97792.8	111918	114921	140010	143028	108176	112849	131979	134572	148590	149787	167152	173848	124518	113775	116816	118111	121459	123546	165192	157260	136748	145236
Traf2	999.455	1431.09	1040.84	1397.25	1865.24	1766.13	1569.29	1940	1351.36	1959.36	1684.37	1694	1679.58	1883.63	1596.21	1365.95	1196.04	1333.59	1747.15	1360.74	1674.62	1656.73	1067.98	1882.26	1863.2	924.304	1422.53	2474.27	1878.85	861.942
Clcn2	3520.91	5236.13	5291.11	4317.8	4331.72	5288.13	5048.76	3843.68	4190.84	4181.28	4972.03	3958.02	5037.97	4879.78	7300.03	6182.05	9404.85	8912.44	5818.91	7483.67	8195.98	7705.24	7386.04	7484.72	7229.95	8069.34	6319.4	6699.4	7894.65	6751.59
Lemd3	1858.08	2137.65	1840.95	2618.95	2252.55	2673.01	2322.94	2213.81	1894.74	2677.07	1954.93	2628.91	2730.18	2243.8	1872.84	2657.73	2677.48	2607.2	1899.61	3017.94	2476.12	2800.79	1986.71	2020.97	1932.39	2146.95	1712.4	3085.8	2844.46	1913.06
Cog1	3770.55	3861.06	4150.11	3965.82	3896.29	4310.37	4187.51	4282.94	4015.33	4776.89	3293.06	3790.74	3940.63	3824.53	2161.8	2439.08	2456.9	2525.92	2026.98	2000.13	2589.35	2713.6	1628.75	1985.65	2103.18	2489.51	2166.71	2601.51	2459.76	2426.18
Naca	10160.2	9373.78	16538.8	6017.07	9870.77	11089.2	5170.66	5975.49	18330.7	17685.4	16727.3	19013.3	13438.5	4748.31	8834.35	7584.7	14997.4	15420.5	24034.8	28918.7	7033.98	5401.87	8071.16	8994.51	5854.2	6525.79	24562.4	25021.4	16259.7	16486.5
Acox1	11930.2	13433.5	14548.2	14636.4	12143	12834.4	13220.4	14241.7	13370.2	15005.5	11774.6	12117.4	11234.2	10808.6	6876.84	7532.94	9184.94	9058.6	7442.7	9755.89	6915.16	7120.98	5721.31	6185.96	5265.59	5704.48	6210.85	7288.14	6443.08	6921.88
Irf2bp2	951.338	1162.45	602.004	3989	1494.01	1279.8	1063.04	733.297	978.441	1121.7	1118.17	1289.83	1020.67	1074.88	1190.46	1422.86	1796.77	1409.04	1303.41	1546.64	1653.12	1593.99	920.564	1285	1450.3	823.647	1006.3	1409.73	1234.69	1403
Slc4a1	54602.2	52350.8	132385	123487	20900.1	23153.3	84388.3	82298	25370.2	25863.1	35827.6	38581.4	46940.5	36998.6	128585	124441	9931.14	10148.9	24657.7	23317.1	13830.9	14205.8	35636.9	35931.1	79409	81857.4	74999.2	70685.6	43515.9	47110.2
Nisch	5291	5827.79	4951.89	5484.48	5722.13	5775.99	5702.47	6196.03	5665.07	5808.42	6212.87	6271.98	6559.5	5750.74	5067.75	5763.85	5676.27	6123.83	5164.02	5476.86	5432.91	5645.13	4602	5795.74	5426.57	4978.65	4888.9	5275.11	5452.46	4986.89
Pgm2	18210	16829.2	12758.8	13363.1	16355.6	14865.1	12201.2	13169.1	14559.3	15343	16923.5	16609.4	14110.2	17002.7	12575.2	14180.1	14763	13722.2	16093.7	15107	13882	14226.2	12441.2	14402.2	14279.9	16392.7	15275.2	16641.9	17716.8	15598.3
Snd1	31166.9	30797.1	32315.7	32510.7	30956.6	29294.6	31836.3	32075.3	30424.2	30917.6	29314.4	29882.2	27482.1	27064.7	19964.5	19862.2	18073.2	20450	17983.7	19636.4	19821.2	18995.8	18857.8	18859.7	19441	19857.9	18718.7	19453.8	20949.4	20242.2
Pank2	1203	723.914	470.217	945.459	669.372	701.245	527.424	520.245	523.444	597.88	863.174	556.65	952.384	525.473	227.754	569.858	559.49	693.969	402.603	374.462	680.316	1079.47	707.587	673.069	889.519	457.39	688.504	365.038	806.784	928.009
Bcr	2707.7	2149.31	2228.6	2436.24	2257.42	2384.66	1954.95	2381.94	1972.17	1899.97	2320.43	2277.77	1898.44	2115.07	2022.51	2486.71	2113.94	2631.11	2160.29	1887.58	2523.96	2293.31	2211.5	2438.53	2680.63	2662.81	2006.76	2441.71	2364.23	2162.29
Tomm22	16095.4	17096.8	16019	10187	13361.9	17065.4	15544.5	19213.9	16336.5	12950.1	14590	14855.3	15475.9	19171.3	10073.9	9967.98	12528.5	13261.6	14266.5	5599.57	9680.71	11124.7	10944.3	9184.94	10773.4	12066	11590.1	10370.5	11897	9916.19
Lrch4	1494.74	1819.31	2068.33	1375.9	1431.06	1330.35	1473.18	1756.81	1681.82	1550.51	1686.86	2105.3	2942.21	1845.97	1233.81	1595.78	1694.3	1980.4	2253.53	1810.81	1699.8	1775.04	1881.45	2143.63	1524.03	1522.31	1542.88	2092.17	1700.05	1646.53
Rab3gap1	4860.72	6284.34	5683.89	5576.66	6151.14	6676.67	5254.22	5876.24	6319.15	5812.2	6381.43	6409.94	7839.72	5476.15	6615.59	5788.08	5635.08	5769.08	5734.52	6441.15	6118.19	6485.33	5657.01	6017.57	6168.99	6637.72	5668.86	6354.71	5368.02	5281.11
Vcpkmt	114.592	443.262	688.305	940.347	889.325	NA	851.872	NA	658.449	857.715	507.566	1248.4	NA	1161.9	1563.78	884.758	1593.24	NA	988.096	986.331	1338.27	1141.12	1248.77	1593.53	1406.95	1328.83	1212.34	927.13	836.532	1296.29
Sfxn2	1455.43	1529.09	1511.46	1926.82	1535.23	1726.56	1107.74	1600.03	1656.38	1641.54	1617.09	1276.99	1508.8	1831.45	979.9	1820.01	1571.78	1772.82	1367.1	2027.69	1725.24	1091.81	922.57	1475.75	1122.93	1446.63	1577.87	1129.74	1939.12	1430.18
Snx13	831.799	1232.63	1064.97	1096.34	704.551	1453.64	1002.19	1066.55	1203.87	1084.88	924.089	831.964	1420.64	1130.12	942.8	1082.99	1066.11	734.709	487.781	1089.62	1713.02	975.754	1026.71	510.997	875.741	1009.07	1137.39	1010.01	698.2	630.329
Myo9a	1414.81	1282.28	1631.61	1642.59	1663.49	1842.67	1126.52	1878.27	1702.05	1756.17	1732.62	1451.7	1441.25	1474.59	1742.11	1531.38	1205.79	1490.17	1227.04	1426.3	1574.81	1498.87	1630	1301.7	1486.11	1590.91	1402.02	1380.27	1641.52	1576.8
Pelp1	2130.53	2107.75	2243.86	2269.66	2495.76	2572.34	2274.81	2990.27	2100.44	1985.51	1845.82	1813.99	1233.25	1637.12	1202.58	1096.58	1493.75	1311.83	1880.59	1323.66	1966.94	2056.04	867.634	1362.78	1577.64	1264.99	1213.45	1173.05	1907.95	1568.31
Copg2	16701.9	16359	17206.2	19194.7	16637.3	17643	17620.4	18661.1	16012.6	16795.3	16019.6	16209.2	15469	13875.2	9896.2	10453.6	11538.5	11164.8	9895.58	9607.13	10642.7	10924.6	8786.38	9521.66	9397.64	10482.5	9119.39	9024.08	11423.3	10504.9
Psmd9	36281.7	32171	33700.9	36875.5	33299.6	31857.1	35030.2	33617.9	35826.4	37704.6	36284	37015.1	39225.7	35234.2	40645.6	44431.9	39801.7	40024.8	35209.5	37296.1	34553.7	39021.2	37810.2	36745	37594.7	35533.6	39131.8	42867.7	36846	38709.9
Fmnl2;Fmnl3	17110.1	16838.9	20367.4	18297.1	21963	19956.4	18729.1	18623	22006.6	19099.1	19580.9	19441.7	17327.5	24540.7	24650.4	20942.5	24531	24440.7	22642.8	15895.4	22696.8	22998.1	24136.3	27196.8	25892.8	24888.6	22286.2	19363.5	23717.1	23853.2
Nle1	910.116	886.931	530.275	802.985	720.637	708.63	821.878	NA	768.665	1260.41	857.845	551.152	NA	838.195	423.473	408.121	NA	NA	NA	NA	NA	1071.89	465.471	NA	546.756	571.848	884.515	NA	667.232	242.1
Usp34	1524.94	1400.84	989.961	NA	1427.46	1186.05	1688.77	1174.07	693.471	974.774	1635.81	1737.57	1138.95	832.273	1233.38	2459.22	NA	NA	2164.81	1865.32	1703.41	902.123	NA	1614.84	NA	1123.45	2173.71	3214.78	NA	1919.41
Ptk2	7767.48	6121.13	6560	7124.72	6787.38	7122.89	7593.84	7320.82	6458.71	6162.82	7577.19	7357.58	8189.78	6915.87	5643.61	5917.38	5727.2	6146.27	5110.48	6833.03	5777.35	5459.02	4750.7	5593.29	5645.22	5530.33	5137.65	4788.05	6086.77	5770.49
Cse1l	19750.3	18544.8	17549.8	17616.1	18153.7	19189.9	17142.2	16005.5	19820.1	18460	17510.8	17843.7	16043.8	16873.9	15645	15655.3	14010.6	15585.5	14864.5	14878.3	12243.1	14003.7	13459.1	13619.3	14685.9	13687.5	16100	17860.5	15772.3	15276.3
Cd248	5066.71	4813.85	4356.97	5195.89	6210.7	5651.37	4111.25	6713.45	4036.47	6138.48	5944.75	8310.66	6984.8	4985.12	3785.18	4199.46	4552.53	3549.39	5310.29	4459.29	4432.46	5679.01	4782.47	3439.43	6967.97	4900.27	4246.46	5781.83	3559.25	6400.66
Nudt3;Nudt4	2660.01	3485.42	3499.22	2748.05	NA	3635.88	2942.55	5298.97	1840.29	NA	7779.83	8186.7	5507.88	10326.1	7984.11	8999.25	4628.27	NA	4293.93	4963.92	3049.51	3829.42	3493.25	9656.17	4331	4511.11	9111.34	9413.7	5071.71	5691.24
Hdlbp	37221.3	36055.2	34268	32338.2	34131.1	33350.9	35535	35062.1	33360.2	32393.2	30052.3	28978	29345.8	31686.6	18987.9	17471	17302.3	17269.3	18868.4	18280.3	18264.5	19224.5	17143.1	17536.9	18953.7	18917.2	17962.9	17450.9	19784.8	18025.2
Lcp1	75301.4	76773.4	72733.1	67303.8	69540.2	67005	66595	68053.9	68798.7	67857.3	73608.2	75202	71966.3	75172.8	104798	99452.1	97748.5	92924.6	97394	93658.1	110294	103729	104055	107167	106052	100689	107915	104598	100847	101701
Glod4	122015	127936	126327	113702	107744	118054	111451	109673	127199	126567	119915	120828	104892	120296	134110	129369	127374	123092	130229	119698	117382	124673	134855	147130	133387	135251	135260	124960	128922	138452
Ube3a	9079.72	8747.17	8359.44	8507.33	9810.22	9750.94	9012.9	8371.43	9379.97	9657.39	7465.58	9586.03	8053.26	7595.24	7337.92	6930.41	7834.38	7982.57	6541.7	8107.66	9100.11	8060.55	8031.71	6862.64	7953.69	7711.82	6619.7	8611.85	7975.78	7667.86
Dip2b	7045.8	7468.05	6982.02	6992.01	7657.4	7564.26	7271.38	7255.41	7009.93	7331.69	7140.02	7593.66	7854.74	7280.3	6191.98	7450.56	6962.48	6371.1	6329.34	6767.64	6964.71	6770.52	7241.84	6965.8	6320.71	6989.78	5768.56	6123.25	6488.39	5632.75
Micu1	2023.3	2018.88	2250.41	3418.46	3371.45	2713.9	3068.8	3149.69	2807.86	3443.74	2448.86	2086.96	3207.92	2555.18	1763.14	3081.44	3101.52	3283.13	3873.32	2708.9	1802.66	1849.11	2361.26	3345.9	2878.15	3100.22	1916.54	2919.47	3037.91	3078.61
Tpm3	83522.4	78555.8	74716.7	69100.2	67563.6	68037.5	59249.8	57569.6	73475.9	71475.4	68792.8	66291.7	60517.2	58718.3	74863.7	67622.6	106647	105371	99141.6	81115.6	74262.1	68037	77016.3	71560	76138.4	78804.6	75544.9	75140.3	75310.4	74594.4
GaskbB	973.281	860.649	643.239	1147.46	1126.4	861.41	1217.42	1028.52	1150.37	930.534	737.077	805.311	889.729	1131.98	430.137	387.339	195.546	NA	926.881	386.491	NA	500.376	NA	NA	418.357	701.528	NA	693.854	441.611	NA
Trim65	361.359	368.449	258.665	284.66	472.388	378.331	304.99	150.446	388.364	360.226	396.642	334.334	255.451	294.649	167.928	258.391	659.809	NA	387.474	222.008	403.872	485.161	201.284	265.715	162.001	368.682	20.8709	282.998	234.706	127.878
Pacsin2	45963.5	45531	47761.4	45627.2	47160.3	44173.7	42998.7	46382.1	46791.5	46841	47483.1	48676	44141.5	46099.1	53634.9	51769.4	55277.7	53235.3	51207.3	48361.2	55910	52879.3	51898.1	51416.8	54877.1	52413.1	51996	50723.5	54872.9	53710.1
Rabl6	3726.92	4100.13	4079.69	4530.88	4585.38	4270.77	4927.18	4680	4911.88	4543.87	4402.29	4595.97	4702.29	4394.48	3202.56	4218.07	4367.33	4332.32	3845.79	3685.61	3910.23	4396.88	4172.72	4428.92	4150.77	4465.46	4062.32	4650.51	4073.36	4269.84
Magi3	3678.75	3543.45	3742.21	3484.2	4117.92	3660.19	4387.45	4017.15	4224.41	4173.08	3812.17	3760	3834.35	3511.19	4055.83	4159.61	4312.6	4010.5	3709.86	3800.88	4811.1	4216.2	4103.81	5212.62	4347.4	4801.42	3650.75	3442.63	4220.15	3236.52
Dnajc6	5021.74	5944.2	6376.23	5932.45	5448.72	6146.68	6075.49	5430.61	5602.73	6511.8	5917.57	6838.93	5659.51	6064.04	6660.25	9375.83	6281.41	7304.85	6277.19	6851.39	7815.48	7336.22	8437.07	8421.43	7719.79	7306.74	7347.17	7680.87	7346.37	7050.4
Mypn	NA	NA	NA	NA	704.741	901.776	NA	NA	1290.24	1406.15	1757.71	2244.11	NA	NA	737.68	1001.51	1454.93	1382.91	2672.87	2402.35	NA	NA	NA	NA	NA	NA	2617.11	2959.52	1590.56	1577.58
Chkb	3737.56	4712.26	4848.21	3838.24	3966.96	4165.82	4311.8	3795.87	4757.07	3715.67	4352.54	4552.07	4786.73	4282.28	6553.1	4595.24	5783.77	5432.47	5303.94	4351.31	4760.65	5358.08	5689.12	5226.77	5654.39	5030.85	4295.41	4991.13	5888.97	5948.72
Stat5b	3889.03	3456.25	4417.95	3284.85	5089.6	5715.12	4763.15	5236.24	5287.45	5837.47	5500.66	5392.63	4982.06	5719.28	4057.64	4536.71	3208.81	4347.5	4048.37	5660.72	3401.72	4394.66	4747.73	5478.72	3744.53	4849.5	4380.66	6536.14	4753.65	5493.32
Gbp4	1752.42	1513.09	1169.95	1249.59	1436.08	1854.58	1388.09	1264.91	1134.07	1609.58	1632.75	1386.54	1338.34	1278.11	1025.76	957.951	933.923	1043.71	1248.52	1200.48	1084.13	1197.56	1362.13	1179.68	1846.6	1513.88	1833.62	1906.71	1642.37	1965.84
Ebf1	2742.23	2813.76	2708.8	2606.76	2945.92	2880.51	3274.38	2578.89	3090.72	3468.35	2855.9	2968.5	3842.56	2846.29	2997.32	3262.01	3796.52	3141.18	2775.2	3220.45	2854.87	3343.91	3448.85	2529.75	2193.02	3175.99	3325.48	3915.02	3880.53	2991.2
Cand1	45836.9	44886.3	46440.3	42394.7	44261.7	43680	44972.7	47225.1	45751	44493.5	49110.5	47563.1	44361.9	49420.6	53777.5	48052.6	48339.7	48272.2	46604.2	43944.1	53001.4	50740.3	49746.2	52195.9	51996.8	49383.5	48689.7	44778.2	47863.8	47635.7
Son	14444.9	13065	14829	14287.4	15680.9	13848.7	15610.3	15057.4	16358.5	15507.8	12762.7	14891.4	12830.9	15339.9	10163.7	10388	11316.5	11107.1	10179.9	9836.63	9686.71	10258.4	8882.86	10499.7	10223	11164.4	10101	10024.9	10053.5	9355.02
Atp2c1	1091.2	826.681	1184.94	948.209	793.835	906.504	1168.88	1333.31	788.03	849.679	920.959	597.426	1148	906.944	926.526	865.252	626.72	648.46	897.314	992.731	1038.55	1078.01	1233.13	602.132	882.259	898.707	841.699	1355.83	849.575	784.958
Sin3a	3612.75	3980.55	3795.79	3554.01	4195.67	3743.71	3648.05	4372.32	3785.89	3855.46	3450.21	3946.6	4352.84	3010.08	2455.47	3873.24	2616.8	2545.48	2331.12	2657.93	2517.93	3584.57	2426.71	3350.97	2657.12	3030.15	2763.74	3345.12	1788.58	2594.54
Tp53bp1	2320.06	2552.33	2928.18	3098.54	2986.39	3156.89	3232.48	3006.38	2768.33	3190.24	2712.63	3071.69	2203.91	2541.62	1690.85	2397.42	2392.09	2196.74	2428.54	2110.35	1906.93	2718.06	2309.7	2269.84	2270.82	2705.15	2285.79	3328.59	2317.52	2281.1
Pebp1	644387	609095	632698	533360	458265	505526	493012	527803	578041	524923	615481	605113	554372	529312	846827	740593	723952	692100	799472	789546	671062	653503	893596	833556	877094	800912	875888	775273	779451	827450
Alb	2342980	2384520	2030350	1847050	1690110	1843200	2008400	1973610	1752110	1815930	2815430	3069770	2523960	2263030	2679970	2492720	1548940	1679660	2394930	2255420	1823550	1880890	2985610	2948500	3321920	2863050	3513500	3409640	2851520	3175390
S100a16	1932.36	1928.97	2411.44	1502.4	2071.64	1749.71	1823.76	1402.76	1976.6	2307.4	1331.11	1981.95	1348.59	1555.06	2487.34	1446.02	1433.14	1478.74	1921.87	1208.65	2271.42	2323.87	2178.91	1782.98	2551.92	2159.13	1925.49	1193.6	1735.23	2184.39
Srpk2	971.492	1061.39	1388.78	1709.04	1443.85	1608.67	1451.68	1214.92	1626.53	1454.83	1202.68	1017.43	NA	1126.65	727.07	1173.86	906.08	1383.65	845.252	1313.37	1360.67	1378.33	NA	1346.68	838.682	1191.51	NA	1290.88	182.357	1532.2
Ap2a1	33408.4	32429.3	33505.5	31068.8	34129.8	35136.3	35299.9	35844.6	35305.1	33812.9	35490.2	35327.7	35934.5	35423	37896.5	36512.4	33994.8	35359.4	34088.5	32308.5	34775.8	33994.1	35222.9	34658.6	34823.9	33033.5	33624.2	32240.8	30400.3	30787.6
Bcat2	35841.6	37312.8	28336.1	24453.2	21375.1	22117.5	26187	23594.5	24499.9	23964	32586.2	30374.5	20872.8	24294.7	40910.3	35785.1	38122.2	36231	43525.5	44352.4	28480.1	32170.2	35412.6	30786.4	29813.2	28211.6	29061.8	22880.8	38289.2	34291.8
Add2	41298.9	41951.6	49693.1	45297.1	42426.7	42779.6	45934.2	46814.3	46742.8	41842	42405.4	45398.7	42459.3	45888.3	63196.5	57708.5	56629.9	60764.1	52951	48943.1	60731.1	57232	58916.2	61345.9	58758.4	64178.1	53475.4	52565.5	49779.4	51384.4
Scly	3078.47	3416.23	3499.7	2991.09	3167.21	3270.93	2989.5	2965.79	3289.89	2971.87	3099.32	2470.32	3452.53	2812.24	2933.29	2842.66	2275.25	2771.99	3045.74	2760.77	2213.94	2813.95	3104.02	3046.35	2448.65	3482.71	2980.88	2551.4	3214.6	3130.17
Plxna4	1715.55	1371.42	2067.61	1698.74	1848.91	1810.24	1747.1	1861.48	1756.54	1705.39	1852.27	1763.51	1998.36	1699.13	1775.97	1921.06	1906.15	1620.78	1696.26	2028.64	1952.96	1782.84	1957.81	1870.53	1768.67	2182.77	1469.18	1678.94	1739.43	1877.82
Sel1l	2799.76	2816.8	2599.22	4167.25	2963.59	3087.99	3982.85	3521	2919.88	4151.27	2863.52	2629.42	2931.89	2541.83	1833.45	1313.93	747.131	1761.76	2201.31	1786.05	1849.24	1007.67	1723.24	1634.31	2016.92	2818.66	1560.05	2093.44	1934.59	2331.39
Aldh4a1	18520.6	18209.1	16782.2	15670.9	15806.2	15036.3	16383.5	16393.6	17563	16118.9	23160	23049.9	18556.4	18510.8	26294.6	23319.6	25668.4	25195.1	28197.9	28879.3	23863	22904	19270.1	22014.8	23710.8	22334.1	31382.5	27942.5	30724.2	31292.1
Ybx1	19404.2	22326.7	22755.4	23693.4	18306.8	15418.1	21608.6	14302.3	21361.2	17035.9	18633.6	13251.1	18367.3	11659.1	6766.45	8371.81	9756.62	7680.36	9932.59	9759.2	8782.32	8462.97	8046.12	7998.14	9263.99	8153.6	10257.3	9156.67	9006.55	9966.5
Tpr	7396.04	7143.24	7473.26	8231.39	7126.41	7664.44	7723.05	8280.59	8319.08	8268.44	7397.44	7141.83	7231.71	7081.26	6106.23	7556.51	6682.07	6170.51	6397.98	6986.06	6303.85	6662.75	6534.84	6951.03	6179.37	5845.78	6302.44	6744.11	6304.64	7087.56
Pag1	3148.71	2681.53	2668.43	4384.75	3251.31	4189.84	3085.91	3148.3	4797.47	3992.02	2513.42	3626.64	2568	2788.4	1737.12	2817.41	2856.13	1885.45	1492.12	3266.94	1463.22	3234.23	1135.59	3128.15	2137.09	1771.73	2609.14	3240.38	1995.63	3241.32
Entpd5	1794.21	1596.18	2185.39	1892.87	1675.51	1240.34	1447.62	2084.85	1580.82	1715.38	2260.96	1895.06	1775.87	1449.32	1638.67	1645.34	1607.58	2159.1	1743.01	1770.43	1442.23	1680.18	1462.37	1076.16	1450.34	1568.65	1884.36	1903.65	1578.89	1354.82
Atp11a	565.441	1296.26	633.94	1130.44	945.214	972.603	465.25	1015.83	1041.79	845.745	994.986	1056.94	1010.3	977.735	607.683	1097.09	965.036	781.997	NA	1080.58	699.33	NA	330.521	650.744	602.214	594.771	NA	1583.45	1220.12	598.432
Gcn1	6651.25	6777.35	6504.83	6626.6	6903.59	7156.75	7215.16	7649.34	6632.83	7224.65	6566.25	6269.57	6800.67	6731.23	3730.21	3775.23	3562.19	3887.75	3527.05	3669.59	3796.66	3845.82	3976.59	3940.28	3555.82	4285.7	3874.93	3987.6	3645.13	3830.76
Map2k6	19987	19004.3	19279.2	17885.8	20847.4	22086.2	19540.4	17419.3	21420	22511	20504.7	22344.7	21643	19259.1	13071.1	13563	14544.4	12741	13497	15584.8	13137	12533	14800.4	15004.6	14439.9	15285.2	18267.5	17803.8	15288.6	16034.9
Pkm	890525	895241	871701	773868	865023	859186	724840	724534	952534	895308	1063650	1090640	776163	813966	1274410	1213230	1190040	1161590	1743920	1631860	1116380	1097370	1160220	1139470	1248770	1190410	1575970	1563220	1381930	1463790
Prkra	5503.87	6288.87	5262.86	5554.4	6188.96	5469.69	6385.09	5682.74	5571.61	5926.51	6487.55	5628.43	5994.54	5084.62	3969.8	3973.47	3300.4	3186.84	3726.54	3642.01	3451.14	3619.58	3092.28	2684.86	3519.72	3730.71	3345.64	3959.64	3208.54	3672.71
Eps8	3395.01	4111.3	3072.23	3639.36	3646.02	4183.44	2957.36	3157.29	3545.69	4089.42	3011.38	3397.18	5190.49	4073.08	3374.92	4096.76	4017.07	3429.88	3295.75	3060.79	3169.38	3823.64	2434.73	2907.13	3991.08	2971.91	3640.04	3794.75	2980.24	3155.6
Qprt	6207.47	5456.67	4431.81	5116.87	5669.56	5834.81	3965.15	5367.49	6137.64	5685.39	5752.79	5812.96	8533.31	5885.33	4957.45	5148.59	4743.02	4443.21	5100.33	5085.37	4123.66	6406.36	7362.43	7233.64	6224.07	7257.91	5285.54	6314.38	5829.05	6409.9
Map1b	175923	175081	190791	201984	167624	169060	159473	159611	167694	175340	163385	176643	154703	146872	218913	233753	233205	230784	201856	223071	213832	215001	218106	222840	224705	217396	192991	202459	192378	208444
Spg7	2235.5	2055.82	2092.72	2095.13	1517.49	1996.12	1916.83	2012.57	1833.99	2109.79	2046.74	1959.42	1507.49	1479.55	1652.39	1923.85	1468.64	2101.44	2153.06	1935.91	1880.58	1866.46	2209.93	1554.83	1532.06	1540.29	2042.96	1514.39	2008.16	1959.72
Syne3	21652.2	23252.1	18671.8	23387.8	19195.8	21172.7	22455.7	22994.1	20950.3	25600.1	20298.4	23507.5	19795.6	24730	23161.4	23746.6	28231.1	27277.5	21456.5	25484.2	25858.6	28687.9	22231	24467.3	22254	23419.5	20622.6	23768.9	26742.6	22757.2
Sh3tc2	2969.46	3325.08	3442.55	3433.5	3916.7	3743.16	3616.57	3487.18	3572.08	3996.69	3490.55	3878.35	3587.42	3760.56	2553.82	2367.06	1965.38	1985.62	2214.88	1997.29	2483.15	2337.17	2216.52	3018.48	2622.73	2699.11	2448.25	2234.32	2484.58	2160.75
Dhx9	20437.1	21133.8	20799.3	21810.8	20273.4	20564	21199.8	21771	22481.5	21195.8	20305.3	20169.3	20281.3	18951	14263.8	14815.2	13534.5	14936.3	13680.3	13192.5	14216	13884.3	14028.7	14164.5	13005.1	14250.3	12674	13950.5	14816	15301.7
Shc1	2750.4	3278.67	2490.62	3154.07	3228.28	3878.01	3414.15	3332.37	2877.56	2805.85	2565.97	3234.72	3300.88	3548.28	3278.3	4174.29	2987.97	4373.51	2856.6	3208.15	3835.76	3020.67	2502.34	3127.61	2667.17	3513.83	3271.41	2796.79	3177.21	4201.94
Nckap1	13921.2	12638.5	15331	14977.4	15366.4	15857.4	15051.4	14129	14679.3	14295.4	14544.7	12639.1	13097.8	14335.7	13879.3	14331.3	13978.3	14227.8	13182.7	12420.8	13527.3	13374.9	13284	13035.5	13658.2	13607.5	12675.2	13176.5	13246.3	12732.1
Wdr70	388.657	533.17	441.45	509.004	491.384	301.828	445.511	143.941	388.052	NA	593.023	326.157	297.718	NA	373.282	NA	NA	68.8234	NA	NA	367.362	NA	NA	NA	524.316	NA	NA	NA	290.056	NA
Prkcd	10981.5	11659	11693.7	12142.9	10003.7	9517.29	11685.6	12848.8	11592.2	11641.8	10879.3	10861.8	11269.1	11306.7	12707.6	12560.7	12096.1	13201.6	12629.3	11772.7	12182.1	12490.8	13120.8	13078.6	12403.7	12438.6	12900.5	11774.1	12200.9	12012.4
Aak1	17743.9	18432.5	18021.5	17770.6	18914.7	20357.9	17870	18911.7	19038	18642.9	18611.8	19083.9	18247.1	20771.6	22655.3	23883	25357.6	25149.1	21571	22617.4	22335.2	21904.3	26117.6	28018.9	25091.7	25297.7	25067.3	24369.1	23210.6	24119.6
Tagln	138873	135021	56185.8	51149.3	55323.7	54932.4	60760.6	58969.5	48872.2	46181.3	73506	73431.2	74714	75077.1	173574	167666	127470	129991	118095	112267	147127	141705	119158	119408	123182	127409	112394	104890	297010	295242
Clasp1	10830.8	10743.8	11884.8	12515.2	11801.5	12231.3	11247.7	11633.5	12521.1	12495.9	10703.9	11473.4	11086.7	11628.6	13170.2	14522	13234	13828.6	11817.3	12391.6	12762.4	13979.6	13159.8	13371.9	13811.7	13197.7	11687.4	13010.5	12267.4	11347.5
Lima1	15966.2	16352.2	16144.1	16079.6	17081.6	16615.9	16004.7	16974.4	16405.9	15413.4	15779.1	15918.4	15920.4	16823.9	18387.2	18195.9	20288.9	18324.3	16006.6	14801.7	18567	17499.5	18113	18499.4	18582.6	18272.9	17859.2	17873.5	20371.5	20214.8
Dnajc1	3146.7	1904.13	2291.61	2965.18	3048.24	2838.07	2460.62	3041.7	2280.47	2512.04	2338.23	2231.88	3715.44	3014.91	2269.2	1723.37	1573.21	1971.09	1510.54	1287.39	1803.1	1956.43	2418.39	2032.91	1925.09	1590.83	1111.26	1779.8	1607.4	1706.65
Nxt2	524.563	686.49	596.681	582.804	707.14	612.894	613.951	184.54	604.671	1097.33	174.574	447.21	525.384	247.046	411.693	584.233	462.81	443.488	604.273	407.052	502.367	349.797	299.306	319.332	771.069	585.629	551.533	922.39	649.53	462.994
Mthfd1	41025.6	40671.5	45835.5	45892.4	43268.8	43904.9	45472.4	45671.1	44926.3	43010.9	42698.2	42281.8	44351.7	45243.3	40896.2	40382.9	33288.6	34716.2	36010	36873.6	35211.9	33791	35854.9	35488	36841.9	40111.6	41410.2	41876.8	37625.9	37136.9
Mtr	8802.76	9134.05	9205.55	9566.59	8819.58	9406.61	8761.28	8338.72	8236.24	8477.46	7716.41	9469.21	9905.94	8434	8359.36	9391.97	8536.47	8492.32	7810.71	9769.91	9793.78	8903.58	9315.23	9855.9	9196.58	10743.8	8424.81	8762.42	8668.59	8898.37
Acaca	31424.9	31936.3	30357.8	29546.7	27589	28352.7	31990.6	32608	28095.9	28513.8	32052.4	32040.6	33700.8	36711.3	21750.1	21574.4	18293	18052.9	18368.3	18082.4	20405.2	19356.6	24262.7	24967.6	24626.3	25185.3	28968.3	29046.9	28719.8	28309.5
Styxl2	NA	NA	NA	NA	NA	NA	NA	NA	NA	NA	NA	NA	NA	NA	NA	NA	NA	NA	NA	NA	NA	NA	NA	NA	NA	NA	NA	NA	NA	NA
Ints10	NA	651.31	738.151	689.282	451.103	1002.03	535.355	774.265	632.703	970.349	NA	970.539	NA	NA	727.437	NA	NA	NA	393.847	NA	NA	NA	NA	NA	358.104	494.89	NA	NA	NA	1248.53
Smchd1	3487.65	3669.66	2408.76	3314.84	3475.5	4077.01	3166.86	3521.05	3098.67	3805.28	3982.24	3173.61	4674.05	3750.93	2646.23	2666.63	2502.44	3002.53	2505.49	3460.64	2620.27	2753.93	2300.61	2708.64	3034.6	2715.01	2302.66	2624.86	2715.93	2809.02
Tgfbr3	3396.92	3610.3	2953.36	3325.18	3250.73	2997.05	2347.37	3338.41	3110.84	3796.21	3325.17	3074.72	2360.54	3060.81	2235.64	2606.96	1971.92	1600.37	2317.92	1874.05	2328.86	2362.61	2321.55	2265.75	2177.57	1884.53	2095.01	2309.67	2163.84	1890.23
Dmxl2	6050.33	6299.35	6622.72	7114.73	6663.83	6936.4	5543.6	6164.82	6699.83	6400.96	6296.46	6483.26	6534.18	6419.17	7405.9	8178.14	6945.35	7649.45	6721.75	7331.33	7439.83	8479.57	7459.69	7882.73	7421.03	7818.8	6728.02	7153.15	7355.08	6711.39
Rbm28	525.868	743.904	650.139	680.314	823.629	1410.81	730.464	803.203	729.605	988.972	682.227	1136.65	905.559	677.923	496.519	254.884	NA	687.684	831.668	894.784	921.981	763.264	901.701	NA	60.7981	403.506	1210.23	750.144	382.56	650
Relch	3032.85	3207.92	2951.35	3093.32	2881.96	3596.92	3060.18	3049.37	2934.84	3485.57	2666.07	3341.85	2664.85	2675.61	2644.39	2545.38	2431.79	3056.96	2510.61	2949.8	2973.48	2466.06	2560.4	2890.9	2452.29	2608.17	2117.48	2815.31	2605.6	2654.67
Ift140	1058.51	857.474	873.069	1208.75	1437.54	1465.32	1141.25	982.18	1153.35	904.823	923.736	747.218	651.678	876.721	906.769	1134.78	666.208	850.697	1012.48	928.161	971.495	940.539	681.409	757.758	786.929	941.882	NA	907.457	745.004	NA
Sptb	18013.4	18564.4	36882.7	36428.9	13397.3	13480.7	24346.9	24265.9	14024	15421.4	16958.5	16559.6	15963.9	14922.3	38969.3	40588.3	17192.7	15822.5	17392.8	19332.1	15795.1	15879.7	20340.7	20450.1	30849.2	31054.9	28077.2	28767.1	22304.2	22272
Prodh	3538.37	3450.47	3623	3155.94	2894.81	2768.76	3125.44	2978.5	2391.48	3127.43	3725.1	3110.09	3202.64	3884.41	5384.62	4873.25	4465.34	5108.35	6186.04	5394.91	4892	4569.33	3772.06	4550.03	3924.78	3948.58	4234.8	4040.3	3959.69	5185.01
Man2a1	4164.87	4347.77	3848.48	4239.17	3709.05	3492.71	4826.03	4809.08	3352.35	4001.14	3652.84	3284.46	4379.28	3716.23	3216.66	3399.7	3075.25	3048.95	3826.5	3547.71	3452.57	3416.04	2459.08	2929.26	2931.65	2765.97	2774.5	2655.34	3203.63	3205.87
Wdfy2	5742.24	5220.55	4569.65	6027.1	5699.86	5805.95	5343.76	5610.17	5975.56	5579.53	4727.54	5801.82	4837.82	5496.32	2906.33	3899.08	3710.77	4112.28	3889.19	5356.69	3654.72	4353.8	3586.8	4602.11	4430.39	4781.51	3788.35	3071.39	3409.8	4023.12
Xab2	1423.37	1702.87	1742.89	1820.5	1397.26	2029.67	1443.07	1726.82	1493.7	1852.74	1633.11	1577.56	2365.43	1591.52	1132.43	1334.77	745.111	1305.12	975.873	1468.84	787.844	1073.28	1584.27	1850.9	1554.73	1623.63	1552.4	1050.81	972.87	1529.02
Pik3cb	1018.03	948.567	1290.1	973.447	903.512	1352.84	1373.85	1227.33	1072.2	1142.55	1296.4	1244.08	1185.07	1195.26	1549.38	1220.02	1636.92	1175.11	683.329	1731.43	1653.72	993.503	1106.65	1867.49	1899.35	1814.8	1167.5	1439.66	1824.57	1239.19
Prpf6	5345.86	5089.49	5183.42	5531.21	4785.58	5042.71	4833.64	5373.1	4921.14	6293.6	4465.58	4778.71	4801.55	5389.51	3498.01	4170.7	3303.32	3629.69	3577.61	4333.04	4746.48	4253.44	3381.33	4181.64	3521.51	3599.84	3935.03	4282.3	4048.51	4250.16
Phb	53577.8	51851.2	56637.4	55239.4	54411.6	52639.6	62729.9	62744.2	60062.2	56396.4	64523.5	62365.9	54109.8	58878.3	55012.6	50773.5	60903.3	60472.2	55809.1	58663.4	54784.4	53994.2	48256.4	50278.3	53897.1	50994.2	56679.9	58648.3	52391.1	57247.8
Akap9	1663.78	1563.05	1843.56	1898.64	1963.74	2119.02	1745.57	1722.68	2074.27	1985.28	1790.6	1939.01	1817.65	1807.59	1238.26	1437.21	1437.13	1560.25	1154.21	874.83	1068.93	1098.22	1223.94	1343.25	1368.07	990.71	910.828	1255.96	1430.31	1289.89
Eci2	11271.8	10917.6	12348.5	11731.1	12040.8	12035.5	10619.1	12697	12372.8	12109.1	10800.9	12391.3	10293.5	11501.1	9057.25	11830.4	10324.2	12011.1	10302.5	13259.8	8256.59	10965.7	9214.55	8568.33	10009.2	9772.49	8209.21	9682.24	10091.3	9646.97
Kif5b	50791.9	47770.8	54392.3	55040.2	51225.7	52737.4	49726.7	50680.3	53064.6	53971.7	49714.7	48979.5	44304	45165.1	40726.3	43740.5	40029.6	38002.7	38916.8	38630.9	38510.7	37554.4	40546.6	40323.1	39340.6	38935.1	39972.3	40334.8	38448.9	40577.3
Fkbp4	34675.7	31063.2	32152.7	30182.8	32521.5	31231.9	30309.4	29506.2	28992.6	29827.5	30364.1	28716.9	23793.7	31472.3	26296.5	27806.3	30251.7	33320.9	29867.1	28521.2	31271.8	32026	30806.5	33621.2	32591.9	33439.4	31949.8	32120.2	32216.1	32081.5
Pcdhb14	NA	NA	1472.98	NA	1537.58	NA	1196.72	1576.41	1755.34	1866.28	NA	NA	NA	1930.42	NA	NA	NA	NA	NA	619.787	NA	NA	848.833	944.778	NA	NA	NA	NA	1677.49	1519.09
Nemf	1948.85	2094.19	2133.46	2228.74	2184.02	2396.13	2629.5	2566.92	2531.38	2145.86	2069.04	1942.52	2342.51	2102.93	1637.93	1652.51	1742.47	1923.07	1678.86	1472.48	2368.2	2070.67	1549.56	1698.14	1822.93	2075.37	1456.59	1791.19	1577.85	1923.41
Txndc15	1857.63	2249.49	2265.66	2729.89	2636.67	1838.49	2456.2	2248.4	2595.35	2436.58	1481.89	2243.08	2227.53	2809.15	1630.11	1429.7	1366.79	1710.06	1294.9	2096.44	1513.45	1583.92	1192.27	1424.98	1275.81	1598.43	2199.94	2295.48	1590.04	1434.35
Mybpc2	1413.17	5005.28	4208.34	3684.24	98523.1	90045.9	18032.6	18778.7	165142	163378	201107	205061	4869	5753.83	172048	169229	135380	137011	543779	527015	14240.1	15682.6	1341.95	3105.22	95584.5	89383	536440	498252	325935	346553
Nek4	472.387	443.484	561.013	737.534	272.492	370.906	489.746	702.381	459.095	268.985	269.779	331.041	NA	560.015	314.662	610.279	895.78	406.697	NA	446.347	377.829	598.947	485.532	363.296	291.366	730.492	208.101	447.9	895.374	254.385
Map4	392318	418535	381161	340879	379568	410863	319657	352301	340946	346739	326805	352230	367862	371464	329278	312904	334599	345159	299843	304287	311249	345029	329417	344745	354108	337243	339219	353004	328026	371771
Eloa	1786.96	2595.04	2064.24	1826.09	1851.61	1972.83	2373.14	1707.46	2143.6	1649.37	1774.52	2495.87	2578.85	2268.13	1595.93	1979.17	1937.98	1198.8	1257.37	1542.32	1773.31	1344.11	1232.74	1428.62	988.326	1923.91	1581.7	1702.47	1228.66	2026.12
Fnbp1	17865.3	17383.2	17586.1	16619.7	18747.1	17744.7	16361	16095.2	18281.8	16483.8	18198.8	16601.5	15544.1	16960	16642.3	15389.3	16093.8	15231.2	15835.3	14453.5	17182.9	16134.9	16605.5	16226.1	17071.1	17288.4	16050.7	15422.5	16489.8	15850.3
Copb2	89792.9	82798.2	76994.1	77194.8	83725.4	80674.3	82118.1	81816.3	82828.5	80365	80624.1	77127.4	76389.8	75245.6	44528.3	45909.5	39388.2	42077.7	43558.6	45635.5	42890.7	43855.7	45485.8	46882.9	40545.6	46548.5	40200	41848	43678.7	43030.7
Mrps35	1119.3	1431.11	1512.71	2238.62	1432.43	1549.05	1622.54	1007.74	1398.76	1910.58	1603.2	1821.77	1479.23	1390.97	1402.72	1185.1	1487.87	1552.55	842.603	2218.17	995.22	1049.87	1041.07	699.023	1367.79	1324.94	1436.24	1010.83	1643.42	1278.85
Prune2	8135.69	7591.94	8185.69	8192.54	7689.13	7987.69	7154.58	7512.96	9128.41	8905.53	8203.04	8216.05	7564.94	6971.81	7866.34	8791.71	8432.79	8577.81	7320.32	7911.25	7013.81	8200.78	8796.84	8936.71	7815.93	7805.65	6452.69	7984.5	8810.24	8545.76
Coq5	1455.5	1239.67	1677.76	1145.05	1656.17	1375.37	1311.39	1088	1692.98	1929.64	2231.51	2673.94	1404.4	961.07	2270.25	2386.55	2331.95	1676.64	3308.57	3135.88	1852.8	1444.22	1497.11	972.951	1244.87	1882.44	2835.97	2959.13	2715.56	1721.64
Gigyf1	883.565	1175.46	NA	1180.64	881.119	1109.08	NA	1178.02	855.47	1185.82	781.59	997.826	NA	1142	721.935	1017.3	631.195	1041.1	784.226	733.223	1215.53	1172.1	NA	815.66	1377.93	NA	923.041	945.868	967.965	853.261
Gigyf2	2093.41	2366.53	2131.82	1962.89	2694.77	2876.39	2424.61	2273.37	2601.13	2546.73	2118.9	1856.76	2966.25	2856.89	2022.53	1645.57	2163.36	1569.23	2297.7	1756.57	1861.85	1802.96	1466.2	1761.39	1489.95	1841.95	2065.99	2311.53	1995.61	1886.79
Sarnp	21160.5	20699.7	20710.8	19570.2	20233.7	20325.1	19647.3	20498.5	21411.2	20356.7	18267.2	16736.2	21786.4	21102.1	14771.5	13922.6	15914.1	14716.6	13349.9	12136.3	14573.6	14075.9	13199.2	15504.1	15154.4	14792.1	13812.5	11266.9	17288.2	16574.2
Abcb10	1455.28	1473.93	1803.88	1698.88	1740.26	1552.6	1746.67	1561.9	1704.69	1835.95	1790.16	1995.1	1650.78	1815.13	1669.63	1720.15	1951.33	1385.41	1401.37	2075.32	1835.31	1666.36	1532.98	1244.66	1226.43	984.23	1438.13	1449.81	1797.26	1741.28
Vps13c	3701.72	3798.96	3366.76	3302.91	3273.67	3206.83	3640.65	3599.57	3249.09	3105.58	3945.73	3940.01	3581.91	3133.29	4785.24	4498.64	4725.35	4080.55	5049.74	4572.39	4564.38	4481.84	4112.42	3932.78	3855.3	3766.22	4945.03	4966.96	4968.53	4889.63
Galnt12	NA	NA	NA	NA	NA	NA	2177.58	2224.72	2206.19	NA	NA	NA	1655.18	NA	809.018	NA	1311.23	NA	NA	NA	NA	NA	767.431	NA	1173.02	1759.33	NA	NA	846.057	NA
Galnt2	5839.12	5771.68	5523.3	7193.16	6880.75	7111.51	8145.4	7862.27	6632.07	6482.09	5937.4	6762.66	7551.42	6250.64	3845.72	4668.47	4081.21	3043.92	3742.4	4311.97	3948.1	3947.04	3432.01	4055.24	4985.8	4181.77	4733.19	4823.79	3938.48	3627.1
Tagln3	46537	47600.9	45085	46932.6	43594.3	45795.1	45655.2	44884.1	47157.5	45870.6	47319.9	47908.7	40717.6	49136.4	86985.2	81168.2	93108.2	86509.3	71583.9	71517	89938.6	86852.3	91627.6	101493	85304.7	89371.5	82257.1	70111.3	84850.6	85070.8
Sarm1	4690.5	4701.54	4854.45	4817.35	5282.89	5852.19	5584.44	6059.97	6064.42	5530.64	5865.27	6489.91	6064.81	6294.71	6954.13	7425.42	7009.6	7534.08	6407.21	6658.79	7547.45	7409.63	7258.7	8082.66	7444.88	8001.13	6620.21	6378.05	6731.56	6059.67
Cad	10570.7	10218.6	10270.2	10923.5	10645.4	11087.4	11325.1	11159.1	11147.2	11225.1	10204.8	10388.4	10881.8	11385.9	6874.42	7625.05	7086.98	6871	6991.26	6757.56	7759.81	7005.63	6502.78	7243.68	7296.51	7455.9	7092.41	6483.2	7344.45	6731.56
Tia1	884.901	506.901	699.247	NA	761.08	1380	NA	985.615	NA	990.776	1197.15	NA	NA	NA	NA	NA	534.298	NA	NA	NA	799.811	319.009	391.993	NA	382.052	NA	NA	NA	NA	NA
Ywhae	307524	294163	314303	296886	275766	307765	261596	273256	267675	291678	278117	296321	236206	240602	263501	279552	242828	268475	278767	288481	262890	283010	264255	279674	290424	257038	277962	304977	238173	285640
Tnnc1	401.916	512.866	1935.63	1839.27	NA	NA	NA	NA	NA	NA	NA	NA	558.689	976.707	NA	NA	47806.8	43899.8	13932.1	12792.7	7413.6	8189.02	NA	NA	NA	NA	NA	958.324	NA	NA
Tnnc2	12104.7	44074.9	42331	21997.6	243964	255332	54322.8	51060.3	450400	421938	645922	580204	25876.8	22408.1	430619	394635	409604	374502	1416010	1228020	85635.2	76171.7	9139.93	10996.1	209846	269492	1285700	1267340	827111	820875
Col6a5	84739.4	82741.4	79752.5	74610.4	76654.7	75496.9	72239.9	71406.9	71874.2	68801.5	67697.2	69809.5	72768.7	71037.8	131469	122210	127753	129845	113629	114770	116907	123080	122221	126167	112864	106004	109546	105232	117564	116946
Lrsam1	16223.1	17273.1	17627.2	17040	17249.5	18024.1	15692.4	17811.9	18055.8	18524.2	15446.1	16618.7	17228.2	17114.1	23309.7	23889.4	21793.4	22839.7	21301.6	21058.6	24487.6	24981.3	24473.2	24202.8	23114.2	22089.4	22430.8	21137.8	21165.2	21863.7
Lman1	33348.2	28724.7	29805.1	29844.6	30251.7	29831	34135.5	33224.3	29654.6	30924.3	30313.6	28340.1	20774.5	26384.9	18662.7	14840.6	18887.5	19466.7	20066	19496.5	18682.3	19121.2	18511.9	18588.8	18589.7	16635.9	19948.5	17507	19732.1	21335.8
Serpinf1	32342.9	31680.7	28095.6	28533.9	30870.7	30853.8	36473.2	35835.8	26868.4	28793.3	29883.3	30150	27394.2	29890.7	21610	22555.7	19585	18466.7	23086.8	23993.4	23976.7	21468.9	25524.6	27486	26487	25809.7	24511.6	24543	26454.6	27597.2
Itih5	27514.4	28443.3	31316.1	30166.5	28256.9	30802	28506.9	29984.6	30356.6	30599.3	28675.8	29449.8	26258	27631.8	18370.3	19079.1	16432.2	17802.2	15189.4	16045	15190.7	17027.1	17414.6	19062.6	17645.3	18625.2	15388.1	17684.5	16505.2	16164.5
Srrm2	6337.89	6657.19	5032.59	5714.91	5407.74	5708.85	7142.66	6431.44	5881.91	6053.28	5273.8	5737.35	6762.94	6836.2	4992.4	5084.43	4676.55	5204.67	4611.37	4175.68	4547.45	5303.63	3401.18	4696.26	5057.05	5701.57	5317.75	5535.58	5357.96	5434.66
Sdha	47011.1	45926.4	50355.5	48102.9	49257	48154	52293.7	49954.6	52935.8	54461.7	60804.3	64021.7	47966.8	42958.3	52374.7	52115.8	56535.1	57760.8	69937.4	70801.3	48477.8	45121	45185.8	47429.3	46017.9	49603.2	63782	66066.2	56877.1	60936
Kyat3	3624.29	3770.68	2732.24	3416.93	3192.47	3686.19	3345.77	3196.82	3441	3547.16	3611.61	3856.64	3742.97	3738.45	4153.94	3491.7	3955.61	4447.26	4256.11	3932	4824.6	3773.39	3354.46	3743.98	3319.98	3864.2	4487.62	4781.96	4000.82	3554.66
Dpyd	2189.28	2852.71	2401.03	1927.08	2276.5	2449.31	2415.97	2417.74	2671.09	2283.29	3072.01	2247.2	2171.76	1772.08	1674.2	1594.5	4464.79	3254.6	1914.53	2359.08	3064.24	3933.38	2044.31	2171.26	1856.8	1215.75	2139.78	3456.03	2704.2	2165.54
Sec24a	4710.51	4328.45	4906.19	4448.46	5333.03	6201.15	5173.11	4698.99	4987.24	5913.38	4636.14	4575.71	5470.84	4284.38	3496.78	2908.48	2547.51	2924.75	2390.18	2265.22	1794.02	2322.94	1761.93	1969.42	2272.3	2836.07	2710.98	3051.43	2163.08	2399.71
Itga3	6836.54	6273.54	7173.74	6320.01	6483.46	4712.9	6910.43	5914.44	6166.29	7320.67	5963.68	6623.32	6286.89	5853.38	8175.18	8558.7	9059.14	7853.96	7695.05	8375.81	8132.48	7808.58	6681.77	7375.62	7716.36	7378.76	6612.92	7371.91	8154.72	9854.17
Vps51	5828.11	4870.12	6029.65	6145.24	6034.85	6685.11	5600.22	6117.8	5320.39	6411.1	5711.27	5865.42	6434.07	6313.12	4666.04	6065.58	4727.06	5853.91	5696.72	5253.77	5767.73	5983.84	4593.36	5728.29	4530.01	5624.08	4287.03	5551.06	5521.84	4842.81
EEF1AKNMT	1145.31	1423.31	1289.33	1367.47	1568.3	1617.95	1191.87	1296.08	1358.16	1489.31	1357.91	1049.38	873.563	1551.15	1154.53	1600.63	1355.5	1338.99	1006.4	929.518	1492.67	1495.88	1028.98	1126.74	1420.32	1754.06	1488.34	1579.08	1240.76	749.579
Cpsf6	8951.67	7760	8263.21	8372.14	7927.86	8581.03	8265.76	7414.97	8277.94	9054.43	7556	6151.33	6697.31	7029.14	4299.49	6207.7	5151.64	4075.18	4408.57	5495.97	4775.43	4774.78	4497.51	4727.22	6385.49	5026.13	4292.07	5990.49	4771.03	5318.56
Igsf3	3594.34	3583.39	3879.01	4040.15	3669.77	4714.6	3595.57	3914.63	4037.02	4045.23	3430.19	3178.85	3331.15	3587.52	2378.45	2605.67	2293.62	2407.18	1685.76	1813.03	2484.58	1670.52	2152.72	2388.03	2121.93	2525.04	1661.25	2010.4	2030.19	2296.37
Aldh2	197701	192941	185269	175785	175648	172289	181054	180215	171241	168093	189757	200763	172868	197951	193869	174680	193618	189898	210581	193794	197809	193926	155806	166049	167648	159728	183139	181683	187734	202854
Palld	13049.4	13022	7377.18	6088.04	7612.16	6755.45	8354.52	8840.14	6052.49	5773.29	9498.6	9480.37	8362.83	9286	15659	16067.4	12490.3	13152.3	14381.8	12694.6	12956.1	12978.5	11383	11542.8	11054.8	10717.5	12917.3	12157.6	20935	23639
Commd3	6302.45	6726.85	5804.49	4964.38	4388.44	4829.66	5403.63	5766.33	5934.94	5733.16	6502.4	7323.95	7268.73	6457.54	4749.99	4575.49	5362.74	5696.84	5335.35	6128.43	5611.08	5014.2	5372.21	5437.86	5898.9	5571.22	6309.55	3951.02	5225.58	4969.25
Ik	1574.44	1715.36	1716.12	1751.51	1889.61	1931.64	1690.49	2364.83	1756.55	1820.53	1646.19	1553.84	2522.22	2131.56	1250.1	1334.41	1275.37	607.671	1530.98	1256.04	1727.86	1543.98	1288.26	1534.31	857	1232.76	1161.6	1230.6	1668.44	1518.21
Ncam1	41055	42313.5	45741.7	41875.7	35567.9	35122.4	40203.1	38361.6	37666.8	37336.7	34976.4	38329.7	35659.5	32466.6	33971	34057.1	32391.4	34874.9	34348.7	32364.3	33557.7	32938	35114.8	35427.7	35858.9	34900.9	32846.8	31587.4	34389.5	34363.4
Ccdc124	7234.23	7874.92	6331.05	8402.78	8631.23	8667.4	7091.5	8075.77	7627.26	9393.38	6364.34	8018.43	6667.35	7438.39	8556.45	8840.08	7158.5	8760.52	7136.88	7974.21	6863.41	8882	8113.68	8356.85	8041.9	9923.45	9868.97	8960.65	8249.13	7756.34
Ctsa	15943.9	14904.3	16668.5	12330.4	12712.3	13358.5	18033.5	15005.4	14164.9	14372	13128.5	13544.6	14242.3	15096.3	9983.19	9305.13	12123.2	8384.15	9882.83	10237.9	11930	10792.3	11785.1	10010	11530.5	10490.3	9813.23	10067.5	10229.5	10529.1
Naprt	9684.7	9190.03	8822.79	9665.82	8093.33	9226.23	9477.04	8625.18	8373.18	8461.02	10382.9	10992.2	8495.47	9893.33	13568	13986.4	11263	10185.3	11277.9	11040	13590.4	11542.2	11460.8	14082.8	13149	12159.1	12325.7	14244.6	12362.1	12123.3
Srm	51527.5	50764.7	45973.7	38470.9	46436	44167.5	44229.3	42209	52465.6	51061.3	48199.1	43503	51359.2	48563.8	35667.8	34815.1	36646.3	31673.2	36276.7	32912	39908.5	34831.2	41677.8	37378.1	40726.5	42712.8	35695.3	33194.1	41213.6	36118.2
Iqgap2	28309.6	28184	29742.4	29577.3	32169.9	31951.6	29974.3	30483.2	29806.6	28696.4	29760.4	31416.1	28855.2	31448.5	32023.4	32510.9	35459.7	33671.5	30275.7	30161.7	35832.8	37498.6	31671.9	30813.4	31336.6	32824.8	28437.4	30213.6	28752.9	28464.4
Smarcd2	4111.29	4036.03	3773.6	3885.64	2600.44	3282.17	3909.26	4850	3309.73	3879.32	2866.69	3535.34	5108.73	3935.45	5708.83	3911.01	1908.61	3325.19	3212.98	3844.27	3249.43	3758.39	3415.64	2625.25	2514.63	2514.29	4368.18	3748.51	4028.6	4194.09
Npm3	1919.29	2517.68	2516.29	1680.08	3129.09	NA	2876	2140.77	2538.6	2039.5	2206.79	2776.84	2713.78	NA	NA	NA	1462.92	NA	1837.6	NA	1789.06	NA	NA	NA	1695.38	NA	2268.38	2419.35	1164.63	1305.26
Rcc2	10313.2	9883.96	11034.5	9703.74	8868.15	10260.3	9349.45	9597.21	11023.2	10450.7	10900.7	11131.1	10715.7	10752.6	6886.83	7453.55	5105.47	7083.06	5824.59	6879.64	5490.36	6159.97	7390.52	7092.23	7402.15	7749.66	6702.96	6890.3	7154.22	7177.44
Ap3b2	5619.3	6048.39	6451.35	5916.84	6837.12	7045.44	6646.23	6576.85	5886.27	6552.88	6629.59	6346.59	6596.35	6436.59	8817.03	8649.08	8155.34	9552.58	8438.29	8409.43	9402.2	9100.53	8652.61	8422.4	9157.08	8965.72	7652.79	7879.75	7704.71	7706.33
Cnp	946850	893667	1080170	957781	877875	932441	987543	967526	1001530	1013430	928132	980756	882629	836383	884661	841111	883719	894494	870292	814332	915971	883111	939546	961330	964202	859603	857509	838312	851641	896215
Ankfy1	7206.84	8604.4	7427.34	7851.56	6793.79	7400.46	7314.14	7445.32	7221.37	7435.46	7544.04	7170.21	7394.32	7675.91	7038.63	6847.74	5845.52	6522.78	6823.87	7454.19	6938.48	8108.98	6432.56	6871.3	6531.85	7075.55	6986.78	6178.49	7500.06	6914.76
Frmd4a	2089.94	2132.29	2384.99	2851.72	2433.79	2773.92	3149.31	2696.24	3161.31	3101.26	2042.84	2627.55	2367.85	2774.48	2472.81	3305.78	2048.9	2955.31	1376.46	2397.45	2206.13	1960.24	2431.4	3023.44	2919.61	2692.27	2131.58	2777.13	2607.73	2306.44
Dcxr	3152.63	3936.36	2891.19	3527.86	2922.4	3174.3	2500.71	2473	2850.19	2681.44	2687.03	2934.19	3011.92	2769.42	2618.78	3139.42	2073.43	2717.83	2578.21	2897.5	2998.85	2356.86	3854.44	3087.23	2782.03	3531.06	3462.97	4069.15	3416.77	3025.96
Bag6	6306.2	7195.14	6445.17	6574.33	7084.73	7172.2	6237.01	7074.23	6674.18	6826.16	6512.15	6983.37	5799.02	7392.79	7178.18	6224.9	6413.52	6778.31	6779.79	6880.37	6543.58	6405.66	6573.4	6793.77	6443.05	6183.5	5661.63	6959.9	7247.67	6443.08
Dusp28	1457.17	2101.49	1657.74	1408.39	1514.22	1958.32	1601.72	1663.11	1663.18	2141.99	1652.54	1897.67	950.347	1513.01	1823.93	2216.7	2386.16	1760.87	3588.02	2964.02	1364.87	3077.24	2147.07	2737.89	2380.76	1469.25	2260.33	2365.69	1999.4	2198.13
Rida	48202.5	43232.3	42014.7	44623.1	39189.9	40381.1	40935.4	38083	34831.6	36289.4	40478.4	41999.7	41651.2	41249.3	69117.2	67288.9	67787.4	72705	68182.7	63478.1	68853.8	69929.9	71612.3	72831.5	77665.5	76468.7	75799.4	77542.9	76576.9	78172.3
Bcl2l2	4969	4101.66	3865.48	4936.18	4456.97	4337.88	4858.69	4722.99	4269.65	4610.9	3842.4	5098.4	5250.15	4580.35	3900.08	4914.8	5274.02	4710.16	3727.73	3819.46	4131.12	4339.54	3917.71	5922.16	5283.89	5509.53	4478.33	4824.08	5161.31	4733.78
Stk4	3600.39	4318.98	4253.24	4372.97	4771.76	4425.7	4123.91	4569.56	3619.75	4934.54	4160.46	4157.25	4379.75	5140.52	3027.56	2769.94	3035.64	2960.8	3449.28	3718.62	4665.64	3450.6	3072.12	3612.69	2996.62	3875.57	3764.9	3516.51	3496.14	4010.3
Tigar	3716.24	4400.01	4272.28	4345.97	3884.3	4723	3547.31	3987.6	4289.93	4819.49	4088.21	5618.96	4491.15	5096.44	6241.1	6626.12	6040.28	6261.79	9009.34	8951.78	5796.32	4877.11	5814.54	5427.06	6536.53	6852.49	8413.93	8272.91	7217.52	8506.57
Kank4	26457.5	27020.9	29610.2	27466.4	27621	28142.5	24890	26208.2	28804.8	28682.7	26811	27305.2	26812.3	24966	22328.4	19618.3	19853.5	20532.9	18750.3	18679.3	20675.2	22929.6	19552.8	20622.5	21973.1	21264.1	19276	19583.5	19016.7	19581.4
Gart	20438.7	21537.1	20625.3	19516.2	20815.5	19652.4	21206.5	21072.1	22005.3	19413.7	21325.6	20811.6	23225.6	22290.7	22498.4	20741.6	20998.4	20545.3	22507.2	20818.7	20102.1	19326.6	20204	22157.3	21060.9	20672.1	24239.7	22523.8	22359.5	20246.2
Stard13	3378.44	3536.72	4250.68	3242.48	3483.65	3855.99	4057.46	3817.28	4039.71	4227.12	3847.44	3811.7	3302.42	3463.15	3881.13	3437.48	3798.43	3575.61	3131.87	3145.45	3410.06	3647.38	3134.6	3542.32	3121.91	3626.28	2798.96	3256.26	3002.84	3231.33
Hykk	3516.49	3757.52	2929.06	2628.77	3075.45	3133.79	3134.92	3130.56	3038.14	3475.11	3648.4	3356.87	3251.12	3402.31	3558.73	3409.91	3075.68	3043.91	3496.12	3532.77	2793.95	2700.2	2426.57	3177.13	2961.56	4382.71	2584.32	3571.26	4229.99	3767.92
Dhx29	2086.44	2321.62	2218.1	2552.85	2120.45	2691.64	2157.26	2387.96	2225.9	2237.11	2126.97	2099.39	1955.34	1956.42	1574.8	1809.62	2046.05	1618.3	1473.95	1612.45	1788.92	1757.56	1554.66	1637.21	1186.28	2205.27	1819.46	1665.74	1723.97	1520.52
Dmwd	3440.09	3619.49	3448.71	3835.25	4419.95	3795.57	3770.48	3236.97	3398.12	4267.54	3292.37	3809.61	3095.63	4031.33	3368.98	4497.59	4080.1	3156.45	2864.67	4006.56	3370.98	3610.85	3649.99	3079.01	3430.8	3548.99	3415.58	3722.75	3391.31	3085.2
Lmna	316787	281465	296480	294348	276264	275793	321162	319007	298827	304947	303111	311502	286898	285400	365703	347690	399896	395492	364812	374554	383662	372275	342918	371807	350465	316155	343206	334813	361779	381240
Mkln1	NA	408.4	637.14	511.068	904.765	613.896	1177.23	861.245	650.274	898.016	1399.95	NA	1114.46	NA	NA	485.695	NA	NA	320.102	NA	NA	NA	NA	NA	NA	NA	982.149	NA	306.735	NA
Strip1	4615.05	5357.86	4795.01	4893.65	5249.64	5635.81	5442.96	4890.81	5407.22	5020.53	5630.83	4728.22	4931.09	4841.75	2853.89	3930.41	3918.34	3437.8	3541.03	3774.49	4389.96	4476.6	3934.63	4179.84	3641.21	4924.92	3759.59	3386.74	3193.93	3889.91
Cdc5l	7580.11	7318.81	7754.99	7945.46	7175.08	7582.25	8294.55	8223.42	6837.17	7183.06	6764.12	7743.71	7237.8	8213.38	4427.99	5848.27	5425.16	5376.47	3762.87	5862.42	5968.13	5409.75	5620.97	5324.4	4950.65	5569.84	5574.02	6393.58	5470.07	5164.2
Rap1gap	2413.49	2586.18	2506.46	3052.95	2767.05	3103.69	2829.51	2709.09	2726.34	3071.46	2940.18	2732.46	2626.77	2549.8	2432.07	2530.51	2243.18	2391.75	2309.32	2066.71	2523.89	2374.94	2139.88	2516.95	2234.9	2706.03	2195.64	2561.08	2224.77	2514.62
Col15a1	217548	210603	230803	215101	225657	235024	253085	248822	238955	240697	254384	270527	252064	284714	293494	289102	285618	286751	265069	262074	309084	310404	312709	303078	295604	283720	272618	270695	259631	292685
Erc1	11713.8	11467.4	12992.5	13446.5	14188.1	13437.2	12595.7	13619.6	13596.9	13703.4	11369	11041.1	9654.82	11989.5	9223.26	10256.3	8098.79	8730.57	8405.83	8410.6	8485.22	8529.87	9215.96	9083.26	8449.48	9236.9	7934.69	9021.14	9745.01	8565.83
Igbp1	7426.97	7150.32	7001.49	7146.72	8091.58	6604.33	6524.56	6984.96	8079.74	8009.51	7080.09	7644.09	8261.13	8231.27	6907.81	7511.45	7297.6	7483.82	7086.81	7960.39	8083.16	7749.24	6468.98	6956.7	7530.35	7783.35	6998.54	8164.78	7429.63	7442.18
Arid1a	1574.42	1563.61	1402.5	1619.07	1812.93	1637.43	1842.62	1805.65	1688.13	1885.13	1279.61	1744.5	2207.78	1487.97	1086.75	1445.78	1466.67	1505.94	1298.44	1237.16	1600.04	1443.4	812.721	1462.49	1055.29	1952.72	1398.58	1211.82	1757.81	1568.2
Sf3b4	3597.34	3398.81	4107.66	2101.08	2914.34	2553.96	4053.3	3394.89	3004.49	2400.71	2951.69	3371.32	3368.41	3548.26	2079.9	2092.46	2268.48	1879.43	2028.33	1678.42	2113.06	2107.15	2099.15	2332.19	1959.79	2369.65	1943.89	2252.1	1753.33	1290.52
Rrbp1	55090.4	54712.6	54776.8	57358.1	49918.9	54073.9	57226.2	60454.8	52608.7	53427.9	45399.2	48015.4	44623.2	49879.1	26410.7	28531.4	25271.8	26679	27067.8	28237.1	28019.9	30533.1	24621.1	27279.8	26743.5	25704.6	25990.8	26209	28287.3	27668
Tbc1d5	3446.18	4186.64	3750.05	4026.83	4077.61	4643.83	3920.81	4307.57	4127.64	3892.69	3828.98	4680.01	4542.85	3610.76	3771.81	4249.27	3466.17	3676.69	3060.8	4785.35	4682.85	5265.32	4162.17	3886.24	4036.44	4443.02	3734.01	4169.25	3999.12	3770.13
Cgnl1	4538.3	4240.37	3962.41	3678.19	3832.09	4115.08	3602.75	4213.13	3901	3932.06	3807.05	4578.3	4770.31	4965.61	5258.18	5817.24	5363.67	6065.03	5179.17	5500.61	6262.34	5724.88	6258.76	5986.46	5563.53	5992.51	6056.5	5989.28	6307.59	6121.62
F8a1	904.341	798.327	781.882	1064.56	474.533	1059.7	797.293	953.269	593.635	694.503	846.125	938.003	1115.86	835.211	1098.05	944.257	1077.16	1134.36	510.954	951.613	1171.7	654.628	1344.23	810.003	1430.06	933.836	1017.16	783.913	964.316	791.168
Adam23	11022	11812.9	10948	9520.42	10630.2	9919.37	10658.1	9876.38	12427.1	10962.7	14063.1	12017.2	9286.46	9745.63	19586.9	18631.8	16879.3	16092	14940.2	12025.4	14168.7	13729.5	17473.2	18963.8	16848.5	17219.5	12822.2	13304.8	15711.1	12737.2
Flnb	108018	104940	111755	106558	106060	105863	107434	107795	109468	105122	106482	108104	104657	105786	103714	97998.1	97980.5	96617.6	91076.3	88556	93265.5	92488.5	101785	102039	97607.6	97748.6	98505.9	96601.7	96675.6	100126
Macrod1	3614.51	5317.58	5245.45	4722.36	5808.49	6887.86	4549.75	5735.24	9661.48	8093.06	13427.8	13581.7	4739.06	6467.08	12640.7	14274.7	17121.2	17221.8	25499.5	25046.8	10982.8	11125.6	10802.8	10097.6	13762.4	12265.7	24219.8	24506	19150.4	18389.6
Ptprf	5426.89	5297.87	5185.47	5672.87	5759.91	6232.41	5065.18	5814.84	5337.2	5496.64	4924.7	5327.34	5427.2	5721.59	4999.81	5056.26	5629.34	6063.37	4817.9	5881.29	5515.71	5648.06	5446.91	5466.57	5062.89	5700.63	5257.3	5496.45	5265.6	5550.67
Jagn1	2664.21	3029.1	3355.8	3013.3	3229.57	4196.96	2145.92	3711.68	3208.33	4885.12	3443.9	3354.97	2933.23	2633.92	2375.82	3279.46	2215.9	1776.35	2227.73	3451.98	2335.6	1947.64	2606.07	2904.03	3209.91	2187.6	2608.16	3202.98	2643.54	2443.31
Cnot3	2976.56	3700.75	2642.36	2568.58	2668.52	4016.73	3052.94	2822.74	3711.66	3373.37	3873.34	2952.53	2610.15	3506.37	2876.92	2738.75	2396.36	2461.71	2494.16	2421.59	3025.91	2548.78	2366.42	2108.02	2982.5	3277.15	1561.29	2478.4	2819.52	2392.76
Gosr1	1399.49	2388.04	1596.44	3284.85	1746.32	3273.8	1734.49	2217.87	2830.07	1828.72	1734.43	1397.14	1713.65	1020.48	1986.05	3106.23	2123.48	3004.72	2143.82	2469.24	2528.7	1831.53	454.601	NA	NA	1038.94	946.235	1791.61	1804.97	2378.54
Oxct1	69959.1	66845.6	64039.6	59271.7	62877.6	65661.2	63241.6	63588.1	67313.2	64831.3	73116.6	69785.7	68138.9	70281.5	52123.5	51215	59633.2	58606.1	57738.6	55257.2	53037.5	55655.9	51827.7	51701.8	51391.9	50311.4	53497.5	49737.4	52027	55314.4
Kcnd1	232.435	NA	423.336	435.872	NA	353.964	240.138	NA	414.644	679.048	NA	399.496	NA	744.489	NA	NA	285.455	749.02	269.785	NA	NA	457.531	739.929	420.032	NA	519.096	402.495	299.164	NA	NA
Hnrnpm	43518.4	39654.6	38378.2	35963.8	38354.6	35999.3	40734.2	40482.5	41092.4	40712.3	40660.2	41667.7	37279.8	37540.4	27855.7	27584.6	25848.2	25437.7	28180.1	26320.7	28264.5	26045.2	25332.2	25169.8	27847.3	25017.8	27035.2	27208.7	28661.2	28747.8
Hspg2	387447	365812	394831	367384	342959	354453	390792	387519	384153	369560	400466	428141	386790	383045	410604	386961	377247	388793	357033	342336	349855	356728	426368	418118	407448	377207	377689	369498	351322	367771
Rplp1	47889	51652.6	52049.4	48881.7	43737.7	50919.6	40171.6	58965.5	56468.6	45709.6	57822.6	53779.7	58271.7	58137.1	37207	32653.8	36118.3	43877.6	42008.1	36645.4	42032.9	36488.8	25876.9	34917.6	43285.4	30705.8	38138.5	33472.8	37844.7	47661.5
Ruvbl2	23893.2	23912.1	23573.3	23934.5	23517.1	23842.8	23905.3	23947.7	23592	23539.3	23133.6	22868.4	20647.4	22449.8	20544.5	19087.4	20476.4	20155.3	18370.1	20073	21344.1	20533.9	20997	21566.9	21337.9	20936.4	18898	19373.8	19657.7	20528.6
Pcbd2	11311.8	11396.7	11576.7	9282.16	9663.91	7787.76	10336	10208	8557.26	8057.34	9837.39	8471.98	12912.3	8425.65	12576.3	10950.7	14179.7	11574.4	12225.7	12191.3	13982.3	12891.5	12938.3	14191	14108.7	11759.1	12471.1	14369.4	15061.6	12238.3
Ubxn7	2712.43	3171.43	2762.58	2574.51	2690.54	3333.46	2917.79	4272.72	3117.88	2547.9	2788.24	2963.15	2043.22	3533.17	2294.71	6204.53	2737.17	2512.88	3206.57	1938.36	2534.1	3314.1	3453.58	3013.79	3104.71	3336.65	2898.26	2020.4	3402.02	3555.1
Myo1b	20099	19437.4	21433.7	20879	21335.4	20831.2	21748.4	21502.5	21038.3	20663.7	20049.2	20428.6	19814.3	19685.2	20222.4	20496.4	19092.9	18119	19032.5	17668.6	17533.9	19367.5	18301.6	19100.3	18048.6	20127.7	17562.9	17013.7	18607.7	18395.4
Vps33a	7453.62	8117.29	7970.97	8440.54	6751.77	8518.16	8998.94	7301.14	7685.8	7121.02	8256.24	8036.13	8884.25	8013.46	7675.49	6763.5	7226.54	6865.55	6735.06	7265.14	8282.59	7665.96	5989.95	7381.59	6938.11	6394.52	6759.21	8251.03	6316.71	7118.65
Armc6	8958.88	8998.31	10381.4	11287.3	7594.72	9801.41	9970.89	10817.9	9178.88	10669.2	11823.8	10609.6	6657.24	9238.24	11521.9	11342	10140.7	9655.08	10257.6	8466.06	7143.34	11854	9031.34	11085.9	12522.3	11513.2	9651.67	10686	9495.58	8757.95
Cct2	63145	63277.3	71989.2	61735.3	62843.7	62656.6	66043.3	61752.9	63799.9	57690.6	61696.6	58862.3	65055.7	59423.3	65074.8	55660.2	59401.7	57718.6	60285.4	54966.3	60987.4	60133.5	61063.8	57048.2	61956.4	61026.6	63698.3	54867	59797.6	58832.2
Cpn2	10516.8	10484.2	8126.37	8589.47	7294.68	8945.68	9821.05	10311.7	6617.97	6295.19	9694.74	9521.75	8866.88	9337.65	7176.74	7725.54	4640.41	5344.89	8510.05	6980.88	7072.16	6670.11	8244.04	7773.79	11634.3	11867	10698.2	10121.1	9933.02	9642.32
Raf1	998.485	1257.66	1054.15	1008.46	747.259	1140.73	603.548	1112.22	1376.17	1488.13	941.028	1370.59	1794.66	1380.56	714.955	936.918	1049.22	958.17	902.607	687.855	474.858	1236.12	871.857	1524.29	1172.98	434.401	938.295	1153.63	1277.25	1034.32
Stxbp1	76786.3	81798.1	90302.5	88176.8	80292.7	79551.1	78605.6	81526.7	82627.5	82955.5	77849.8	81394.8	63821.9	68509.1	107678	105311	95146.6	95559.4	91501.2	92199.3	93547.1	93136.4	97448	99112.2	99713.7	100778	92339	91206	91657.4	93165.9
Rpl14	67872	72782.9	90503.5	73928.8	66618.3	66331.8	85194.9	91710.4	75603.7	62768.4	77990.1	74059.3	114010	89436.2	57328.9	40907.1	46419.4	42124.5	46232.2	48323.3	45264.5	39783.6	45301.2	48360.7	47336.1	49210.2	67011.2	50028.7	53535.4	59391.2
Smu1	7083.96	6486.39	5969.5	5789.33	5902.11	6840.01	6082.13	5874.52	6742.56	6283.61	5375.73	5426.71	5952.25	5926.6	4624.77	3335.18	2771.6	3472.19	4372.68	3616.93	3962.64	4871.71	3175.87	3782.43	4734.26	4143.53	3835.47	4875.02	4110.28	4031.5
Rbm14	15549.5	14184	16057	17166.6	17336.7	16858.3	16980.8	17084.7	17133.9	17994.8	16052	15851.7	15466.6	17328.3	10578.5	12232.5	11840.6	11898.2	10186.8	11233.4	11446	10762.5	10107.2	10417	11986.9	11523.1	11054.5	14721.2	10867.5	12480.9
Fus	55624.5	47657.4	52030.8	52913.8	51669.5	48260.2	52929.3	50921.3	53624.5	55843.4	52052.5	48325.7	47002.2	42094.8	36455.2	38252.5	36097.2	37187.9	36455.9	37882.9	37658.9	34526.2	39388.3	38206.3	38826.7	36822.6	38200.9	36035.7	39001.1	37669.6
Afap1	3423.48	3999.45	3524.93	4482.37	4608.57	3597.68	3447.15	4326.84	4391.72	3947.04	4109.61	3113.57	4693.46	4380.86	4805.16	3937.21	5092.12	4060.48	4266.94	3659.43	5365.18	4596.43	5310.57	4921.46	3980.06	4776.22	5068.17	4973.63	4514.15	4989.14
Pbld1	NA	994.065	1023.97	853.499	1165.96	1102.38	934.905	445.752	635.054	695.149	NA	957.722	1194.24	776.575	1505.56	912.821	965.494	1368.97	1373.72	1252.64	1072.81	2135.84	822.11	1932.53	1749.78	1563.24	1241.63	1395.58	1154.79	1334.82
Vps35l	2802.98	3039.84	2762.52	2830.7	3277.86	3477.98	2763.41	3181.59	3149.76	2892.04	2915.28	3078.3	3430.34	3235.47	2588.48	2284.92	2564.82	2394.85	2636.98	2160.58	3257.47	3131.12	2508.64	2274.79	2358.42	1967.12	2779.96	2329.76	2480.88	1970.79
Ydjc	NA	NA	NA	NA	NA	NA	NA	NA	NA	NA	NA	NA	NA	NA	NA	NA	459.343	NA	NA	NA	NA	NA	NA	NA	NA	NA	NA	NA	NA	NA
Tdrkh	4393.42	4599.4	5278.5	5151.5	5089.89	5595.48	4356.25	5155.91	4746.61	4925.38	4105.25	4515.81	4342.19	4764.36	2945.85	3696.11	3505.51	3558.44	3602.11	2487.11	2851.76	3025.14	2654.53	3516.38	3731.76	4415.62	3705.5	3874.62	3568.95	3145.64
Crispld2	5724.19	6609.51	6604.07	5699.88	5348.11	6024.35	6275.95	6769.92	4815.15	3052.72	5354.66	5939.05	5879.49	5931.41	5353.71	7281.53	6637.46	6412.4	7729.09	7166	7043.86	7311.02	4913.34	6601.5	5949.69	6497.04	5556.83	5843.37	5321.78	6154.12
Eif4g3	4280.85	3575.62	4224.66	4027.27	4253.61	4234.23	3957.91	4686.36	4056.25	4565.14	4203.68	3957.23	3673.16	3866.24	2882.77	3765.07	3097.22	2784.33	3131.28	3250.03	3174.19	3307.44	2701.86	3169.71	2887.11	3284.52	3018.35	3351.35	3235.18	2828.19
Nprl3	614.793	343.242	508.99	869.793	920.637	903.837	1036.94	838.495	1226.62	822.566	1071.93	823.56	770.511	1125.93	652.934	1627.25	710.087	1027.84	539.984	857.055	783.975	777.128	977.803	890.146	NA	819.302	784.603	847.46	792.621	1001.13
Prmt5	13203.1	13658.6	12453.9	13210.3	16985.2	15285.3	14807.4	14621.2	14906.9	13508.1	14721.1	15065	13592.5	18538.2	12182.7	10389.9	9962.47	10534.7	9318.58	10437.5	10023.1	10099.5	10564.9	11229.3	9825.82	12982.5	11364.7	10647.1	10533.6	11700.4
Erc1;Erc2	12081.9	11884.1	13205.9	12108.8	11694.4	11752.6	13722.6	12870.4	12534.8	13341.3	10268.4	11167.1	9456.94	11432.4	9478.23	7403.46	8098.12	7008.46	8825.84	7596.23	8301.25	7305.08	9301.02	8250.69	7494.8	8807.38	7459.07	8211.92	9520.19	8524.68
Ttc39b	1764.06	1536.53	1793.24	2417.97	1851.18	1801.72	1331.63	1135.76	1978.82	1913.48	1063.06	1893.3	2401.9	1389.17	1368.62	2218.22	1891.76	2384.02	707.614	1511.21	2502.06	1489.8	1113.94	1472.6	1633.72	1627.8	1626.73	1423.25	2126.38	1484.78
Abca6	6131.41	6351.42	5559.95	5612.22	5637.67	6214.17	5929.09	5222.79	5655.91	5697.22	5553	6811.84	5202.41	5578.19	6865.71	5848.3	5519.44	4948.7	6007.14	4900.24	6014.81	4166.68	5723.08	4974.23	5639.48	6707.85	5389.46	5219.42	5902.59	5376.61
Rbm17	2884.78	2753.52	3241.81	2907.72	2968.97	3576.78	3359.11	2970.13	3663.99	3700.69	2675.73	2761.54	3779.8	2996.06	1943.26	2338.39	2527.32	2251.4	2347.83	2595.84	3049.54	2884.94	2074.89	1832.6	2382.1	2443.2	2279.27	2438.21	2135.26	2239.68
Exoc3	4656.77	5396.16	5124.64	5246.55	5668.17	5431.11	5764.69	5556.4	5468.2	5395.48	5337.3	5094.39	5919.2	5632.3	4707.67	4621.6	4699.52	5803.27	4152.93	4979.47	5197.17	4870.5	4438.37	4811.51	4744.24	4661.31	4180.69	4503.23	4612.08	5176.25
Acp6	6033.14	6561.74	4483.89	5041.42	4809.12	4839.39	4167.82	4922.73	5119.37	4586.81	5498.06	5499.88	4568.48	6050.49	4886.5	5363.77	5467.45	5221.4	7443.65	5976.74	4450.71	4554.47	4689.83	4358.78	5492.79	5265.27	6352.61	5877.42	5349.43	6285.08
Ddx21	4761.62	4819.82	5180.55	5355.28	4970.98	4884.58	5010.41	4429.2	5572.8	5315.49	5046.92	5308.49	6691.42	6121.87	3568.09	4277.59	3818.15	3831.13	3986.33	4013.43	4242.16	3992.24	3709.19	4049.01	3861.24	4395.36	3873.56	3426.37	4602.81	3691.18
Rab24	5816.05	6572.03	6837.65	8010.42	5974.38	7220.97	4960.04	6996.8	6847.06	5467.17	6542.97	6958.86	7229.32	7480.93	5565.57	6484.58	6675.82	6353.45	5935.91	5361.07	6466.18	5712.11	3188.45	7375.59	6258.29	8124.12	4727.28	5676.13	6178.01	6951.94
Slc27a1;Slc27a4	2030.15	2655.37	1732.09	2760.21	2574.79	2756.88	2587.8	2750.32	3160.17	2081.19	3555.67	2354.13	3812.28	4617.48	2479.19	1973.98	2126.79	1725.68	1606.25	2435.89	2789.35	3276	2889.87	3141.96	2602.91	2570.12	1487.78	2985.53	3700.15	2534.65
Prdx6	150127	151154	146667	130866	111034	121039	131547	129112	120824	130591	145640	150917	122081	124424	204418	173422	192596	178212	204058	186433	171168	173165	196744	208640	203779	201497	217892	200184	218596	213152
Itpr1	2018.42	2622	2396.14	2874.53	2090.98	2392.81	2738.57	2520.07	2081.04	2376.83	2256.68	2282.76	1979.82	2193.58	3088.99	2690.42	2624.4	2327.64	2064.15	2126.31	2655.29	2477.55	2321.29	2529.15	2647.41	2355.67	3099.85	2786.01	3165.09	2967.3
Specc1l	3450.01	3673.9	3613.33	4115.52	3862.89	3917.3	3568.27	3593.38	3894.71	4019.29	3441.26	3524.45	4363.76	3629.28	3652.58	4613.86	3904.38	4045.11	3580.95	3748.33	3711.09	4054.91	3963.31	3811.98	3964.46	3991.69	3423.53	3768.01	3713.14	4016.22
Eml4	6257.78	7169.78	6666.09	6262.07	8518.2	6730.45	6181.65	7628.03	6607.05	6840.93	6575.91	5594.46	5022.41	6365.81	4423.01	4762.22	3906.89	4901.15	4151.43	3873.37	4993.01	4712.3	4627.04	4579.93	4310.17	4532.83	4089.03	5294.92	4813.28	4723.47
Eml3	3385.05	3222.81	3461.89	3923.69	3898.39	3673.07	3613.89	3495.39	2881.45	3777.37	3601.04	3874.78	3157.13	3799.15	2351.43	2766.03	1982.31	2437.61	2723.92	2201.68	2848.84	2557.12	2114.4	2924	1955.91	2545.76	1645.59	2147.8	2620.35	1831.79
Farp1	11235.8	12008.3	11126.2	12046.4	11389.6	13511.3	12708.7	12455.5	12679.3	12805.1	10456.4	11192	10190.5	11491.8	9622.64	11726.5	8444.75	11117.4	9158.83	10588.1	10834.7	10221.5	9546.74	11605.3	8602.19	9679.62	10046.6	10900.6	10014.5	10651.3
Dpysl3	245974	257563	251302	244193	220909	230001	232045	241810	267995	249768	277403	279217	231020	243362	382022	364032	361089	343880	323547	307951	336005	306884	371012	381340	337075	345346	327257	316498	329047	358855
Crmp1	47285.1	42805	48477.8	48845.1	37984.8	38921.3	42892	39080.5	44445.4	43394.7	42402.7	42439.4	40596.4	38396	52514.8	49255.9	44928.8	49265.1	47407.8	47729.7	45971.9	51831.4	58365.2	61240.9	51048.7	56504.3	48198.7	43839.1	46521.4	50544.8
Dpysl2	822902	797886	856519	787194	672460	682936	692222	756414	773678	770865	793414	872244	673035	698029	1071640	1088710	954574	952798	908679	930436	905409	979582	1106680	1161760	1112720	1011420	998838	896636	928490	1002400
Pafah1b3	10526.5	11359.9	9395.31	8435.36	9817.71	10098.4	9472.35	9176.56	10838.1	8089.26	9455.47	10695.2	14547.1	13108	14295.7	15596.9	15123	16057.5	14292.8	14413	17063.1	18143.6	14509.5	18890.6	13162.2	14896.6	14397.7	15715	13370.9	18081.3
Plec	178780	170280	187519	175157	178437	173440	185305	183388	191198	188728	187983	188530	163665	173383	240475	228032	249493	248933	236481	227002	241875	237357	229514	234197	232390	215770	223735	214746	216989	226860
Cars2	947.571	845.181	718.136	837.919	721.867	1019.24	481.623	877.292	814.743	891.64	792.512	873.664	391.296	671.756	867.577	1054.35	1030.4	1289.05	514.087	1338.62	685.753	1158.58	629.914	879.453	991.823	1140.96	1318.4	1507.99	1163.35	1050.11
Vta1	26520.4	28203.8	30229.4	26681.6	30505.8	28989.3	31022.8	30462.8	30783.6	29373.1	27192.5	28683.7	28442.2	31976.9	28155.5	28498.4	30299	30640.8	26394.8	26905.1	30903	32877.9	29276.7	30099.4	29280.4	30514.3	28435	30064.6	26526.4	25653.4
Grhpr	15768.9	17299.1	17280.3	12155.4	12089.8	16252.4	15734.2	13228.7	14480	14159.3	17629.9	15037.7	15484	16533	23446.6	18652.6	17257.2	16281.9	22066.3	18525.1	17267.5	16900.2	19840.7	21260.3	18947.6	21954.2	22090.5	22171.3	24271.1	23593.6
Flrt2	2308.98	2482.03	2136.75	2202.25	2186.72	2055.59	2559.9	2190.83	1995.34	2173.17	2080.69	2262.88	2386.56	2126.5	3407.17	3420.82	2841.57	2310.27	2943.98	3193.37	3413.23	2861.77	3940.27	3453.19	2749.52	3381.09	3209.53	2908.96	3428.72	4460.78
Shank3	323.994	NA	NA	NA	NA	NA	NA	NA	NA	637.67	NA	770.322	581.903	NA	NA	NA	NA	1412.37	974.893	NA	663.254	1112.49	NA	NA	823.372	NA	NA	NA	851.865	NA
Napa	38197.2	39319.1	41702.3	40772.5	37907	38648.7	43641.2	41556.8	40310.6	41084.2	43544.5	42152.3	47293	41446.8	56281.1	54411.1	53632.9	53544.7	50633.3	52635.4	57176.9	52570	55337.7	51149.1	53275.4	51681.9	53040.6	56620.5	52634.2	50555.4
Napb	17410.3	17937.8	19241.5	23290.3	20102.2	19951.3	17629.9	18804.1	19007.8	20867.4	18371.2	19475.3	20146.3	18796.9	30005.9	30980	29905.5	30164.5	26184.1	27964.8	28202.6	28301.1	26281.1	28022.4	29338.3	27012.6	26435.3	27572.3	25774.7	26753.9
Plekha4	13209.2	12377.8	13276.8	14352.2	14212.3	13851.4	13962.4	14018.6	14477.4	15152.2	13915.5	13966.7	13238	11445.7	9343.2	9880.33	11222.2	9848.79	8073.18	9103.91	8898.98	8311.46	11066.4	11108.4	11167.6	12934.4	9169.38	9913.61	12312.1	9739.25
Cryzl2	4534.07	5603.15	4814.49	5791.84	5132.69	4868.69	4727.72	4984.01	4316.81	4622.31	4557.43	4067.17	4320.92	3076.48	5651.26	5328.85	4894.73	4087.39	4792.24	4333.8	4032.82	4000.02	6191.03	5207.59	5146.03	5157.51	4364.71	4501.1	5305.64	4759.28
Safb	10049.6	9189.46	8431.61	10821.4	9875.98	7677.99	8665.83	8817.12	10125.7	8994.21	6856.43	6844.2	10094.7	7533.83	6539.42	8274.19	7037.51	5632.47	6529.84	6664.09	6483.42	7779.16	6659.47	4783.86	6203.26	6353.83	7331.25	6591.85	7091.74	6920.49
Qdpr	67901.4	61448.6	57270.6	67953.1	67540	70860.6	59687.2	67867.1	62024.5	69607.8	72204.2	73840.5	65468.2	69040.1	79608.1	70397	81565.2	90202.9	83255	90782.2	78082.2	77527.5	77017.3	80991.1	81158.5	77118.9	87261	90001	84408.8	83299.2
Rilpl1	5390.95	5809.97	5116.11	5335.35	5464.5	5637.53	4472.02	4557.65	5508.67	5354.06	5237.63	5396.91	4518.37	4483.69	4816.49	4604.21	5773.99	4774.82	4548.17	5646.54	4899.52	5117.25	4879.17	5545.64	5790.1	5135.26	5196.63	6402.12	5729.09	7073.13
Phka1	741.412	1087.82	1241.32	879.184	3663.77	3283.99	1776.37	1636.69	4485.37	5200.97	6269.18	6246	1132.92	1240.19	4533.18	4456.74	4315.5	4583.5	14237	14877.7	1693.59	1296.59	1338.94	1237.82	3624.04	3437.23	14983.2	16015.6	8818.34	8886.39
Shmt2	38134.8	37971.9	39052.2	37408.4	36708	36665	38735.8	38124	38618.9	40810.3	35717	35992.5	40356.1	38695.5	18581.6	20024.1	19451.7	18092.6	20794.9	19337.7	20996.1	21670.5	22563.9	16712.8	21137.2	21938.3	19905.8	20649.3	19728.9	21607.5
Fam83f	1716.79	1817.78	1469.11	2758.31	2176.17	2418.63	2812.99	2374.12	2076.37	2062.88	1970.92	2024.23	2297.03	2090.4	1126.5	NA	1317.37	1839.32	1707.91	1391.06	NA	NA	1355.93	1766.86	793.743	1576.31	1060.36	1381.79	1675.13	1521.68
Synm	40695.5	43384.9	47024.5	45466.2	45679.3	41872	46537	43953.4	49423.5	49550.1	49753.2	50630.2	41484	43194.6	63652.3	62063.2	67759.8	65163.4	64004.8	59827.2	65392.4	65190.4	64832	68132.7	66558.8	65969.9	63824.5	60677.5	64612.7	61470.4
Celf2	10455.7	10813.9	8461.37	8968.77	10342.9	9004.42	9540.12	9406.3	9059.08	10270.3	9015.34	10262.3	12792	10498.6	6943.94	7558.62	7313.48	5618.79	7194.67	6179.08	5994.31	6458.13	6476.01	6022.58	6060.25	6784.37	6190.49	8753.35	6791.14	6309.39
Celf1	4297.61	4430.64	3794.01	2992.9	3139.45	3785.87	3409.37	3303.49	3960.77	2895.46	3330.23	3369.79	5787.08	3794.78	3063.55	4199.89	2360.79	1979.29	2829.51	2718.37	2706.91	2174.44	2404.16	3167.14	3352.53	3144.69	3995.99	2697.21	3517.08	3001.3
Znf598	403.324	535.256	328.583	365.756	748.181	520.573	531.687	584.123	385.234	540.994	424.362	934.599	571.642	NA	311.189	439.308	NA	NA	NA	NA	NA	436.397	498.881	NA	311.192	473.529	NA	335.656	181.328	NA
Tsr2	6500.01	7710.12	7376.97	6619.42	5076.94	6327.79	4101.58	5549.32	6992.07	5421.82	4996.12	5461.96	4806.1	6549.77	8786.3	8129.21	7155.36	6490.8	7687.93	6218.74	7089.18	8492.88	9951.46	8704.99	9298.36	9206.08	8250.34	7019.71	8239.45	9253.07
Ifit3	1988.5	2140.26	2347.04	1479.49	2424.49	2592.46	1496.21	1974.79	1709.44	1631.56	2781.49	2549.56	2215.64	2933.34	4228.38	4693.65	4499.62	4310.22	4558.83	4376.48	4276.47	4456.05	5020.11	6159.38	5893.18	7089.67	6452.47	8367.75	6430.69	6614.16
Smarcc1	1752.51	1366.69	1395.68	2157.64	2207.7	1768.25	1722.45	1791.48	895.801	1728.53	1083.31	1489.99	3140.01	1108.46	1128	941.969	745.719	1010.42	1475.02	487.696	1057.5	457.42	1880.63	525.796	866.768	911.501	628.084	2084.25	229.466	604.386
Tubgcp3	3141.35	3412.23	3354.65	4387.29	3383.35	3648.66	3415.71	4086.12	3616.29	3619.55	3164.7	3510.41	2819.78	3376.65	2570.46	2539.73	3144.49	3469.85	2237.87	2181.01	2168.34	3263.69	3108.75	2539.48	2592.92	2635.69	1909	2199.48	3183.7	3165.2
Hars1	55750.4	51318.6	52030.2	49887.6	47343.9	47879.4	45984.8	50969.2	49681.7	50645.8	56823.2	56034.3	53775.1	46876.3	67197.3	67777.3	59434	60450.8	54347.8	60227.2	56157.1	54381.6	64229.3	66770.4	61247.3	65995.5	56706.2	56579.3	59371.5	57484.1
Xrn2	2443.31	2189.04	2694.37	2340.85	2547.86	2762.67	2607.69	2174.23	2739.59	3201.99	2417.87	2107.43	3198.88	2609.73	1898.12	1703.94	1658.99	2691.08	1778.12	2440.3	1097.11	2002.58	1481.15	2772.24	1883.93	2435.26	2003.39	2207.69	1920.63	1471.21
Krt19	2055.5	1533.36	1796.38	2021.39	1914.23	1835.27	1900.01	1752.24	1894.37	1605.75	1565.77	1676.06	2287.9	2162.29	2674.3	3029.8	3271.18	2493.87	2173.26	2077.15	2879.48	2951.64	3308.38	3105.76	2907.81	2847.88	3240.29	3389.66	2906.76	2748.9
Eea1	13224	13704.2	13128.7	12216.8	14043.7	13810.2	12965.1	12943.7	13510.7	13744.5	13136.7	13758.2	12537.1	12452.5	14068.1	14201	13596.5	13297.4	13765.1	14076.1	15134.8	14175.4	13587.1	13509.2	13414.1	14032.8	12221.9	12022.1	13902.1	12787.1
Cplx2	2697.33	3073.48	3840.2	5138.75	3659.56	3283.92	3261.68	3321.35	3698.29	3796.88	4266.72	3862.51	2848.32	3700.09	3185.12	4395.04	3255.32	3643.47	2644	3959.74	3488.32	2034.81	5245.9	6758.37	3851.86	4213.22	5368.78	5108.86	3277.15	3682.14
Pm20d2	NA	NA	NA	NA	NA	NA	NA	NA	427.292	657.956	422.332	800.754	NA	NA	NA	NA	953.261	NA	609.243	848.516	NA	NA	NA	NA	NA	NA	1068.72	851.852	NA	815.283
Snrnp200	10125.4	10325.8	9616.34	10234.3	9301.08	10513.2	10189.5	10358.5	9997.37	10164.9	9737.23	9876.86	9950.38	9790.36	6702.24	6923.63	6323.96	6697.77	6314.2	6581.64	6469.69	6836.1	6745.55	6642.72	6523.11	7358.32	6907.58	6379.41	7219.46	6752.3
Mtor	4344.05	4454.46	4889.89	4582.71	5022.26	5339.56	4557.33	4944.24	4747.94	5473.8	4030.23	4861.24	4985.43	4739.94	3799.62	4688.91	4202.85	4353.2	3578.98	3990.46	4587.87	3863.47	3859.39	4353.85	3996.66	4465.21	3659.08	3943.4	3835.84	3940.83
Prxl2a	25258.4	28438.9	30345.7	28552.3	29313.9	26687.5	29751.8	31225	24298.9	25011.8	30521.5	26551.2	23049.7	28095	35808.2	30834.9	34551.2	29852.7	30033.4	28206.5	28985.2	28496.6	32137.4	31126	31394	32468.5	34468.1	31414.5	32406.1	30441.3
Ptprd;Ptprf	4058.87	3382.7	3786.16	3981.56	3607.35	4304.57	3753.97	3323.47	4980.16	4163.38	3609.47	4008.07	4211.82	3348.18	4070.13	4829.04	3671.5	5085.17	4353.87	3508.38	4591.17	4830.35	4523.88	3551.48	3300.34	3570.12	2663.98	3839.13	4900.56	4979.48
Phkg1	NA	NA	NA	10413.1	2294.31	2782.2	1045.42	1828.52	4745.73	5001.61	5698.1	5571.62	1813.47	1235.02	4182.4	4562.5	3178.84	3849.01	13550.3	15468.2	NA	NA	NA	NA	3050.15	3206.76	14924.2	16581.7	8778.37	9701.82
Lin7c	62634.1	68795.4	74482	67586.7	60750.2	64206.1	68135.6	82383.4	76235.6	77936.2	71091.4	75699.5	65321.6	70659.8	83153	74265.2	72815.8	74807.2	71965.2	62273.2	73067.6	72972.8	66940.2	81669.8	84809.9	71052.3	63054.2	70529.1	72649.1	66473.3
Obscn	NA	1771.89	NA	2579.02	10231.1	10150.5	3201.87	3240.32	18434.8	18689.8	31638	32235.9	NA	NA	12775.2	12700.4	25759	24912.4	35641.9	37788.9	7120.51	6904.54	NA	NA	7420.63	8058.6	37461	40220.2	19665.5	19511.7
Tcof1	4971.61	5322.39	4409.27	4899.35	4312.2	4302.16	5073.66	4657.12	4377.87	3966.94	4238.14	4827.25	5692.19	5170.07	3263.39	3186.51	2824.64	3363.44	2422.27	3035.91	3217.41	3536.46	2966.8	3188.25	3386.67	3474.73	4115.7	3591.4	3468.59	3446.63
Gtf2f1	1484.88	1050.67	1240.82	1360.76	1299.38	1347.1	1045.74	1279.48	1111.23	1248.39	880.555	972.048	1574.72	1428.34	950.385	1159.78	699.191	1252.01	556.865	939.826	1194.58	1205.14	320.115	1177.54	450.68	808.788	956.418	948.395	1050.83	695.393
C8a	8292.67	7585.02	6431.23	6741.81	5619.23	5641.4	6127.7	5872.77	1617.96	1853.44	2921.94	2273.58	2266.74	2462.91	8278.83	9607.47	7333.72	6350.15	10874.6	9960.67	9036.8	7748.1	1467.73	1320.57	1957.88	2210.32	2225.85	2439.49	2131.04	1414.8
Naa10	4564.42	3526.89	3954.28	4098.42	4381.29	4257.7	3536.25	4302.32	4910.63	4218.66	4179.32	4005.59	3626.14	3843.67	3479.16	3720.18	3678.35	3620.09	2426.3	2745	3462.41	2892.24	3498.02	3278.79	2703.41	3061.85	4055.6	3169.13	3553.23	3675.13
Dop1b	3151.96	3736.23	2933.9	4075.38	3879.75	4022.67	3929.48	3614.82	3149.41	4070.03	3380.55	3725.23	3206.7	3018.66	2426.15	2684.95	3121.32	3057.93	2765.83	3520.7	3645.24	3083.05	2586.9	3034.63	2622.03	3032.69	3115.2	2807.03	2779.15	3122.56
Dnaaf5	2962.27	2566.01	2576.17	3336.78	3364.93	3248.63	2754.71	2806.85	3209.05	2935.25	2585.8	3359.61	2883.02	2948.26	1990.94	2208.98	1676.68	2640.84	2161.23	3252.25	3615.79	2771.38	2796.7	2249.37	2216.22	2139.34	1846.56	2819.2	1970.93	2662.51
Wasl	12637.2	12809.4	12776	12391.2	13611.6	14150.5	14802.1	12345	15328.1	13010.9	12611.8	12675	11913.1	12459.1	14291.3	13111.9	13235	13951.9	12034.7	12758.1	14727.2	14386.8	14580	13203.5	14532.3	13458.1	11486.4	11441.9	12035.5	13832.4
Ube2o	16818.3	17080.4	18278.7	19258.5	16600.1	17100.2	17386.7	17552.1	17942.9	16806.5	17212	17249.9	17539	17588.1	20594.5	22790.3	18673.9	19677.8	18218.3	18061.8	17663.5	18587.2	17898.1	20023.6	21759.4	20674.9	18952.6	20341.4	17100.9	18606.1
Calcoco1	1658.83	1868.29	1806.51	2561.97	1814.63	2290.93	1646.21	1874.81	2143.4	2410.8	1834.27	1593.68	2034.32	1682.3	2262.5	3272.44	2597.51	2792.58	2382.08	2785.75	2296.58	2711.07	2758.13	2688.25	2421.68	2455.14	1895.43	3357.16	2850.54	2470.79
Man2a2	792.875	909.184	940.781	1224.54	1508.29	1996.17	1279.4	1126.62	1557.5	1887.79	1240.77	2028.79	1734.03	1114.43	687.873	850.267	997.656	621.88	1367.11	1289.15	968.152	727.11	1136.87	673.57	1093.88	1003.67	1541.3	1344.61	1185.57	1022.84
Fhod1	5584.58	5171.95	4949.69	5878.95	5752.84	6078.91	5623.89	4734.12	5614.05	6026.88	5458.52	5711.57	4992.86	4954.84	5154.98	6437.05	6139.6	5817.19	6192.31	8418.27	5521.09	5623.88	4266.54	5127.97	5126.03	5280.46	5982.29	7332.46	6076.78	5602.75
Eprs1	29271.3	27650.6	26990.8	28978	27856.8	28359.7	29107.1	30229.3	30210.4	29532.8	30568.6	30503.1	24051.7	25760.9	21784.5	22618.2	21239.1	22345.7	24135.1	24286.6	19009.3	19912.8	19466	19643.3	20208.1	20557.8	23576.5	24200.3	23486.8	22441
Npr2	1610.46	1668.43	1541.05	1318.21	1463.75	1460.41	1841.78	1330.67	1571.39	1837.61	1789.46	1711.84	1670.13	1542.55	1457.82	1672.56	1243.74	1216.98	1858.1	1383.1	1412.81	1513.08	1557.96	1223.56	1409.16	2096.01	802.416	1369.08	1979.41	1729.51
Vma21	14249.5	13123.7	13641.1	13398.1	10890.7	11654.6	17090.9	12932.3	16479.7	12544.2	10581.1	10199.5	13225.7	12442.3	14703.2	12179.4	14280.6	10766.7	8229.46	10191.6	12283.3	9330.1	11277.2	8231.47	7273	7346.69	13341	9726.16	12766.4	14054.1
Ppp2r5b	8857.28	8751.08	10603.4	11445.6	11220.7	12282.6	10724.6	12154.2	11246	11144.4	10047.1	11385.6	12349.3	12674.2	11585.2	13184.1	12069.2	12901.1	10066.9	12597	11100.6	13048.6	10933.1	13483.2	8928.77	11883.9	9949.87	12251.8	9734.13	11009.7
Amph	24782.8	24423	25347.7	22099.4	22762.7	22998.3	22758.3	23076.5	26317.6	23406.3	25690.6	21981.3	23465.2	24106.1	32322.7	28181.1	30826.2	28319.2	29015.7	28728.3	32356.1	29833	32192.1	31654.6	31829.4	33288.4	29501.5	26160.5	30725.2	28738.6
Dnajc3	16370.2	15435.2	15343.7	14812.9	13787.6	14758.3	13467.1	15278.2	14600	14279.8	14079.5	12245.4	11587.4	14698.8	12868.4	12841.3	9664.47	10393.7	12081.9	15161.3	11856.9	13140.2	8354.86	12530.6	13366.6	12418.7	13367.9	13621.4	12534.4	15654.3
Huwe1	10499	10087.4	10653.1	10915.1	10524.9	10582.2	10525.9	10845.8	11112.9	11329.3	10472.6	10730.4	10148.5	10188.2	9535.05	9985.15	9175.73	9498.05	8443.4	8858.83	10144.5	10404.6	9343.88	8978.58	9194.47	9775.05	8383.44	8673.85	9302.32	9448.73
Htt	2434.14	2896.47	2989.97	3117.45	3207.68	3458.15	3508.06	3218.53	2727.42	3313	3059.89	3007.66	3225.69	3226.82	2769.29	2612.97	2734.37	2457.47	2638.4	2878.13	2869.51	3171.91	2849.79	2655.17	2759.79	3002.25	2786.12	2857.24	3130.5	2616.58
Ptpn23	7526.35	7362.61	6703.14	7648.37	7467.93	8923.1	6850.19	7780.51	8272.89	7985.16	7698.8	7291.47	7737.7	6267.33	8131.3	8620.75	7233.48	7357.48	6689.73	7266.22	7839.96	8766.47	7082.12	7813.22	7460.35	7658.01	6482.02	7660.72	7288.36	6914.69
Foxo3	948.833	658.3	606.915	670.346	982.29	973.546	838.17	947.636	563.944	1135.45	493.516	536.299	1116.11	1011.6	732.759	579.253	1216.26	784.296	682.153	825.421	567.733	758.086	1202.65	813.903	906.306	500.382	610.609	573.431	844.334	477.713
Syne2	5371.88	5566.87	5044.93	5818.37	5366.77	5529.56	5151.32	5750.01	5627.66	5607.25	5211.73	5159.57	5224.46	5108.95	4749.09	5423.41	4800.77	5161.07	4593.58	4772.09	5044.9	4558.3	4512.13	4655.27	4595.1	4667.01	4747.24	5023.13	4599.8	4515.63
Rps25	154106	152337	158182	121950	134194	130002	160671	147755	155735	130551	132342	133866	129008	143062	89884.9	74090.2	90927.9	78678.6	90829.3	74534.8	75981.8	87727.3	66536.5	72434	78329.3	84923.5	81605.6	72009.3	84079.7	85029.1
Lrpprc	8506.1	9390.5	8437.82	8954.73	9792.39	10151.8	9615.76	9623.93	10072.4	10109.4	10876.2	11063.9	8648.06	8875.06	6914.23	6859.93	8085.04	8456.02	9012.54	9235.14	6389.4	6756.54	5796.06	5367.02	5713.29	6606.29	8199.27	8528.49	7684.32	7765.8
Dst	12165.7	12415.7	13053.1	13491	13113.5	13557	13151.1	12958.8	13965.9	13727.1	12842.7	12605.7	12235.9	12743.8	12797	13064.9	13969.6	13811.8	11973.5	12340.8	13615.3	13701.1	13330.4	13408.1	12763.1	13462.8	11137.3	12158.6	12182.9	11477.2
Pak4	1243.32	1282.12	1330.3	1464.48	1434	1643.6	1258.93	1216.81	1480.59	1275.97	1051.83	1310.82	1048.4	1185.61	1328.86	1616.38	1198.32	1327.69	1245.11	1214.89	1289.96	1121.27	993.604	1416.02	1090.28	1173.79	1379.78	1199.88	1519.46	980.15
Aspscr1	6929.42	5680.16	6435.89	5925.3	6245.77	6615.36	5654.21	6808.2	6946.19	7960.27	6335.85	6643.82	5723.06	6674.49	6514.58	6586.6	6732.54	6639.31	5429.17	6296.57	6214.76	5417.88	6293.91	6168.23	5570.53	7097.32	6539.23	6322.76	7284.8	6191.83
Pitpnm1	2694.41	2935.04	3053.26	3075.32	3016.46	3202.2	2819.11	2814.37	2976.27	2864.81	2619.55	2899.34	3313.3	3216.53	2875.02	3618.49	3370.25	3156.99	2962.08	3012.03	3489.02	2947.11	3209.67	2888.53	3517.14	3763.47	2660.86	2867.22	3283.73	3207.15
Ppp5c	9817.07	11967.4	12293.9	10420.1	10180.1	9992.53	8943.46	8810.01	10942.5	9014.57	11924	11176.8	10041.2	10635.9	10516.4	10977.8	9350.19	9549.27	10189.7	10549.8	8252.28	7568.69	11616.3	10943.6	9853.06	9480.01	10937.5	11773.7	10389.9	9256.41
Dffa	16245.5	15409.3	16244	13478.8	16069.9	12633.7	14385.3	14743.3	15340.4	14075.1	16348.8	13870.9	16170.1	16413.8	35326.3	29112.7	34718.8	31376.5	29291	25119.3	33241.1	30502	30639.2	34695.7	32030.5	29434.2	31103.3	24451.6	30461.7	32349.6
Ppp2r5c	4654.88	5199.25	4878.02	5023.55	5691.51	5676.71	5682.07	5468.84	5634.6	4799.42	6179.18	5895.05	5582.93	6825.08	4252.88	5230.89	3145.64	5060.62	4607.71	5056.21	4528.69	6583.6	4090.12	4321.75	4546.6	4719.12	4317.57	4233.14	3588.63	4511.91
Lrp1	22388.9	22111.4	20373.9	20288.1	20118.2	20049.5	22714.8	22583.9	20700.8	20309.9	21349	21516.3	19154.2	19938.9	18062.4	19082	19097.1	17389	18345.3	19797.8	19848.7	19149.1	18165.5	18146.7	17271.9	17403.8	15604.9	17767.4	18495.6	17558.6
Hadhb	79162.6	78854.2	85477.2	83448.9	79779.8	80821.3	82748.1	80764.6	90668.2	92202.1	97324.1	99770.7	65368.9	80009.8	82918	82314.8	100685	102335	98970.6	104405	83862.8	80743.4	72778.1	75970.4	77586.4	76892.4	87855.5	87391.2	89916.9	87237.4
Xpo7	8629.85	9018.86	9972.96	9536.35	9261.63	9640.42	9352.45	9439.36	9069.1	9203	9244.2	9357.73	8497.29	9964.31	9929.45	9992.7	9018.83	9317.87	8590.15	8718.16	8232.82	9012.95	7743.68	8025.16	8317.36	9681.73	8856.96	9427.13	8319.22	8351.35
Hspb2	2653.3	1731.82	1326.6	1945.86	3680.11	2427.83	2478.33	1733.18	5606.46	6777.26	5214.97	6074.67	2018.37	1525.26	2803.04	2925.03	8539.92	4767.54	12660.4	12918	2617.7	2405.93	2569.52	1812.86	2931.34	3168.1	6666.13	6217.3	5841.8	5359.95
Cops2	20298.2	20765.3	22679.2	18432.5	20612.4	19309.5	20585.3	17405.3	21189.2	20781.6	18449.3	18711.4	18361.8	14895.1	22206.2	20975.3	17903.9	16186.6	18922.4	15395.7	15448.3	16012.1	20195.1	18213.1	19544.6	21138.5	21577.7	19326.2	21205.6	19164.5
Ankib1	2214.8	2004.32	1843.95	1628.47	1961.3	1695.02	2418.37	1715.43	1889.45	2033.91	2970.41	1038.84	1908.77	1574.1	525.161	1094.91	2036.95	1141.71	1257.82	1264.33	1242.58	1111.67	1755.49	1356.2	1527.75	1752.36	1017.41	1663.79	1569.82	1113.06
Eif4g1	31819	29402.3	30137.7	31043.1	30301.3	34638.8	29131.7	29275.6	28442.6	32712.7	27226.8	29895.9	27316	26690.8	20729.8	23067.4	20628.4	21952.5	23858.3	24713.6	21335	22662.9	19567.7	21675	23236.5	22262	21198.1	23840.6	21480.7	23018.8
Olfml3	4610.52	4606.35	4369.94	5131.58	4460.8	4979.44	4806.37	3939.58	5045.46	3760.8	4173.62	4308.77	5755.4	5125.65	4855.29	4952.33	4332.9	5206.56	4285.17	4895.25	4336.63	4602.31	4829.12	4512.36	3291.35	3947.39	4679.18	3707.71	5494.92	4497.44
Commd9	1847.38	1889.37	1764.41	2107.08	1470.85	1537.73	1920.28	2374.03	1743.74	1876.4	1959.69	2021.89	2504.21	2003.45	1997.14	1950.48	2266.96	2655.88	2160.24	2290.57	1427.27	1688.39	1578.4	2167.55	2171.53	1865.09	2535.44	2271.7	1889.68	1961.34
Dctn3	39903.4	35024.6	37892.3	32772.2	32974.1	33198.2	35769.9	32149.5	33671.6	32810.7	37015.5	33558.3	28295.8	31721.4	36712	32431.6	39825.6	39218	36800.5	33495.1	39008.9	36248.4	33471.8	33808.6	40180.1	39221.4	30798.4	26991.4	36336.7	34062.8
Isca1	2511.14	2389.88	3116.96	2525.67	3882.38	2155.82	2637.29	2742.27	1801.05	1797.77	2840.72	3059.78	2336.84	2555.48	1325.04	2490.58	2545.57	2397.16	2197.43	2291.72	2031.49	2678.61	2617.41	2048.81	2431.68	2328.14	2991.38	3374.22	3068.58	2469.69
Lemd2	5988.17	4721.47	5421.39	5090.02	6637.07	6173.78	5921.63	5671.48	5900.5	6231.19	5996.68	5780.92	6292.97	6458.58	5482.77	6095.61	6748.43	6067.73	6437.81	6926.83	6091.97	5691.53	5599.28	4963.83	6046.64	6169.9	5716.4	6128.97	5987.1	5961.2
Tubb6	39180.9	41150.6	36577.7	40555.4	38677.9	40732.5	39738.8	44552.3	40938.7	39653.3	39957.7	41810.9	36069.8	40208.9	22044.7	27598.5	19979.9	24801.7	26227.1	27695.8	23182.5	25555.7	25506.3	27258.1	24711	29784	24763.7	27328.5	24186.6	26938.2
Ppef1	3337.49	3323.82	3180.26	4746.7	4271.47	4163.36	3664.26	3980.21	3548.1	3925.63	3790.84	4022.48	3999.79	4049.78	2769.57	4275.58	3920.6	3347.01	2598.79	3431.91	2400.81	3142.97	3940.45	3906.05	4052.42	4263.24	3241.97	3179.27	2863.48	2939.22
Aatk	9496.22	10494.4	11685.6	9312.5	9428.87	10303.8	9076.18	9854.88	9705.77	8943.39	8875.24	8996.58	11626.4	11181	6168.05	5768.17	6828.27	6308.87	5245.68	5636.12	6409.28	6410.69	6536.99	6324.38	6721.51	6142.98	6020.75	5853.33	6435.47	5276.44
Vangl1	1732.73	1525.51	1593.01	1758.12	2000.31	2312.97	1571.94	1649.6	1642.28	1783.83	1440.54	1586.36	1514.2	1729.63	794.358	1330.96	966.585	1216.05	984.766	1217.12	1481.42	1074.95	630.287	884.118	649.048	961.878	1126.87	1311.96	1100.75	1218.52
Npr3	725.015	825.697	869.872	974.507	728.427	771.685	733.328	693.787	649.46	855.578	777.188	941.904	576.203	729.424	1826.46	1501.5	1324.85	1837.14	1697.1	1976.53	1281.94	1290.15	1749.26	2436.74	1749.26	1961.53	1758.87	1704.3	1352.48	1868.31
Gltp	32224.9	33866.2	34267.3	32423.2	32988.5	26602.6	27592.2	28141.4	29701.2	26432.3	29871.7	23670.1	20238.8	24625	23571.3	23248.8	23841	23841.8	23478.9	22015.1	24720.1	21328.8	25805	26176.7	24386.3	24884.3	25331.5	20246.1	24814.6	23746.8
Cdc23	6489.2	6151.67	5569.7	5932.6	6783.18	6139.83	7671.35	6356.06	6263.59	5427.61	5321.33	5176.26	6505.15	5620.8	4153.22	4521.41	3618.95	3995.26	3467.67	3605.66	4001.73	2651.96	4107.75	3992.12	3866.2	3658.42	3626.63	3988.58	4429.83	3258.4
Nagk	17767	20789.5	18120.5	20162.9	18918.7	19302	19082	19698.2	19571.1	20146.7	18280.6	21635.4	18198.3	17982.7	21906.7	25508.4	23022.1	22410.6	20363.4	23807	25886.9	24241.3	22511.4	25534.4	24677.9	22816.9	22018.3	22914.6	22812.6	25953.4
Sbf1	5979.26	6028.47	6197.97	6384.76	5979.26	7037.45	5939.08	6951.74	6221.21	6428.77	6229	6542.7	6613.3	5783.96	6092.12	6022.97	5876.82	6221.67	5836.02	6391.27	6359.83	7073.73	6661.21	6382.25	5617.97	6898.36	6172.77	6068.61	5886.96	6098.12
Sqle	2559.13	2990.37	3169.03	3215.34	4666.25	4311.83	3560.71	3722.28	2506.12	3019.97	2719.44	3176.66	3003.14	3474.12	554.794	NA	494.971	811.463	772.497	478.039	NA	2012.35	585.752	NA	646.003	197.877	802.245	928.884	517.952	545.845
Cog6	4337.39	4416.72	4116.93	4704.67	4930.95	5207.73	4968.78	6044.25	4675.89	4648.24	4480.15	4186.86	4923.46	4852.04	2693.75	2651.73	2604.36	2744.33	2923.78	3138.61	3075.83	2860.88	2406.41	2864.03	3020.01	3291	3185.17	3038.03	2470.9	3166.34
Elp1	4670.3	5223.41	4946.87	5208.77	5227.49	5472.05	5542.12	4886.77	5025.26	4624.87	4954.9	4639.09	4879.58	5386.55	3617.34	3193.64	3559.2	3522.39	3555.48	3035.89	2794.42	3586.49	3422.43	3287.42	3524.32	3430.12	3634.71	3028.72	3252.5	3373.23
Septin8	59012.9	57653.8	66339.1	61315.4	56854.9	52660.6	54802.5	59647.6	56365.5	50096.9	58675.4	59524.9	54658.3	50485.5	57176.6	61439	46223.7	50792	59706.1	51927.4	53342	55088.6	60047	61177.6	63640.2	60137.3	58720.3	55010.6	60396.9	57616.8
Apc	1238.3	845.537	898.012	986.753	597.382	776.219	591.014	854.28	631.743	555.213	808.058	507.764	NA	592.321	777.67	825.531	526.906	562.967	404.451	1043.43	667.541	771.414	464.288	639.842	753.798	894.638	972.324	913.607	647.852	NA
Ctnnb1	29437.1	27474.5	32975.6	32188.7	28200	33876.6	33075.9	33211.8	31751.3	34112.5	29210.7	33827.6	34548.1	30321.1	35177.4	37990.4	33159.3	35573.8	31105.3	30338.6	35191.5	34135.1	32670	35106.5	35329.9	33257.9	30275.6	34701.2	32049.3	36658.4
Nefh	780996	731480	862556	805517	779953	771888	709790	744045	830390	815260	862126	840645	872108	766653	1640810	1504610	1506840	1500700	1397910	1365510	1605770	1497280	1561980	1543960	1621320	1480280	1562660	1467930	1615300	1590700
Ilvbl	7492.58	7145.88	8355.03	9528.37	8231.74	7959.03	7726.31	9055.2	7097.02	8001.7	7961.27	7537.85	8827.58	8290.4	5796.42	6186.04	5671.2	6308.76	4704.51	5107.45	5208.37	5619.36	6110	6574.78	5856.06	5806.04	5645.93	6509.06	5296.95	6521.07
Jup	12391.1	11422.6	12097.9	11457.2	10629.6	12032.2	11247	13544.8	12300.4	14415	10809.6	11326.3	13429.6	13773	12316.4	13679.6	14800.2	13388	14106.5	13367.4	14984.9	15339.6	44053.9	42856.7	13561.3	13197.2	13495.5	14851.1	12776.9	12352.9
Ap1b1;Ap2b1	50801.9	50789	48723.6	47377.9	48627.7	46469	51049.7	47536	47283.6	45596.1	55183.3	51935	53001.1	48316.7	48191	46688	43140.4	43025.2	41090.8	41871.5	48061.4	40826.2	44501.9	41669.4	47459.8	45563.8	44256.9	44410.2	42711.1	44427.3
Coq8a	1196.96	1444.9	1649.02	1601.66	2502.09	3115.98	1688.23	1411	3554.8	5286.06	8863.38	7165.87	1823.2	1884.43	3088.67	2658.29	11427.8	10280.5	10347	10901.2	3426.26	5312.75	1602.42	1298.83	2949.55	3711.97	7399.07	7013.33	5475.96	4875.09
Fasn	232326	221102	215641	203286	185082	180535	214807	213219	195950	190616	219258	225649	254593	261717	155296	146637	138218	134171	147600	138821	161162	156823	168849	169891	169307	162554	199374	184995	175736	180237
Ikbkb	2314.86	2416.34	1960.81	2011.51	1859.91	2202.73	2191.35	1988.66	1556.57	2078.96	2163.87	1850.18	2318.15	2545.39	1902.71	2091.66	1612.44	1855.88	1597.31	1340.21	1980.07	1527.12	1655.56	1957.39	1676.06	1793.29	1773.61	1676.42	1708.63	1676.03
Mylk	22995.9	21134	9926.19	11384.7	9733.47	7888.78	11219.6	11163.3	7775.24	8588.02	12728.3	13732.6	12145.9	12938.1	21768.1	21380.3	15753.7	16060.5	16014.6	12914.4	13994.6	15952.8	13531.3	12930.9	10232.8	11681.1	10972	13807.8	30480.8	32040.4
Cog5	7015.54	8264.87	7823.49	7449.2	7418.56	8409.02	8830.14	7933.96	8228.43	8969.56	7234.79	7352.45	7437.9	8146.95	4706	5479.01	4190.96	4980.11	5371.05	4774.95	4749.69	4689.38	5060.19	5127.67	4693.51	5304.12	4536.67	4582.66	5152.63	5317.9
Hspa12b	12134.2	12020.8	11192.7	11078.5	11586.7	12356.1	10999.4	13439.8	13110.1	12139.1	13483.7	13947.9	11053.9	11712.6	12033.8	13014.5	11968.2	11668.2	12566.8	12773.9	11914	11836.5	9619.35	10723.2	10468.5	11498.9	12048.8	11959.4	11504.8	12543.3
Palm	50054.8	52667.6	53031.5	48703.7	55149.6	53932.4	45624.9	50138.8	51231.5	45159.1	47745.3	52545.5	55117.1	54789.1	75623.7	76212.4	78458.2	78981.5	72082.5	71880.2	75286.2	79281	68054.2	74513	79972.1	81814.7	73625.5	68721.4	69538.9	77142
Abcf1	16378.6	16784.4	16476	15829.5	16166.6	16595.2	14952.4	15804.8	16054.7	15610.3	14922.8	15119.2	15679	13332.9	12074.7	11971.9	11532.8	9643.79	11255.1	10070.6	12041.4	10396.5	10544.7	11954.6	12038.8	12260.2	10175.4	10498.9	9283.98	10771.6
Cdv3	34318.5	29726	26832.6	27345.3	33967.2	29361.1	25543.7	26107.1	30926.5	26881.4	18397.5	28140.8	26057.9	28538.5	25372.1	27515.7	29460	28331.1	19661.4	19937.5	29587.4	23129	31694.6	30021.1	34617.9	32388.8	27325	28259.2	32321.1	26674.1
Eif4a3	32739.4	32603.3	30617.9	29905.1	31354.3	32754.4	34951.2	30957.1	34203	31218	30987	31228.5	26669.1	31905.8	22164	20815.4	23164.4	19947.9	21356.9	19249.1	22992.5	20772.4	22466.3	20654.3	22504.3	20804.2	21809.9	20090.9	20797.8	21801.9
Lsm5	11560	10945.6	10624.1	12573.5	14050.4	14815.1	11777	12696.5	10773.3	11315.8	11749.7	11486.4	16394.9	17841.4	8786.06	8385.73	12238.2	18700.2	12631.7	14750.9	15544.8	23955.8	10347.1	10660.9	12216.4	10372.8	14603.6	14399.2	9003.59	9875.08
Acaa2	145401	154845	130629	128068	133034	130732	132101	127596	147452	144152	161517	159999	144360	153428	142281	135685	169153	179060	173326	171480	139328	151420	141903	142721	141234	144862	161813	157735	143280	137726
Psma2	46409.8	46536.8	51512.4	46309.7	43739.2	39293.9	43909.3	42122.4	46704.9	36696.7	43123.7	39898.9	36297.7	38802.3	37675.5	34753	32941	30314.6	37499.8	35133.7	32156.5	29087.4	30390.8	32389.7	38736.6	33842.5	35347.6	36759.3	38698.9	37677.9
Yes1	27187.9	25113	29946.5	25420.8	25087.5	26934.7	26247.2	26969.2	29027.8	28433.2	27458.9	29399.8	24338.6	25056.2	27739.7	26124.1	21626.6	22390.2	22787.9	22581.9	25717.1	24362.9	24825.4	26355.8	24402.1	27524.8	24546.8	23635.8	25604.7	22755.2
Src	7345.41	7558.66	6792.24	7956.41	7307.42	7673.79	7429.96	8608.89	7263.01	6207.45	6928.98	9051.34	7228.47	7316.83	7626.93	7890.02	8574.14	8311.48	7163.41	6870.39	7260.69	7290.94	8989.24	6744.95	7582.57	8761.8	8257.05	8997.31	7041.89	7306.64
Gatad2b	2980.37	2695.19	2719.37	3278.59	2757.55	2838.43	2939.97	2180.7	2476.08	3316.39	2192.62	1910.09	3498.12	3046.35	1880.33	2628.59	1555.2	1505.35	2193.78	1901.6	1993.91	1806.32	2176.54	2144.26	2111.05	2225.78	2172.27	2073.34	2087.75	2016.31
Vrk2	725.955	698.932	760.506	687.958	572.137	945.449	1326.05	1126.39	1092.49	865.842	992.505	660.863	1224.07	762.043	614.771	481.777	1050.01	918.296	918.882	944.005	855.402	459.488	523.785	590.783	574.93	473.445	1085.05	671.724	688.682	545.127
Itgb8	6293.39	6684.05	5922.86	6597.2	6633.64	6620.22	7386.63	6593.06	5651.76	6175.71	5400.37	6316.66	5918.77	6037.95	3390.8	2846.31	3787.49	4252.75	2997.83	3041.25	3660.47	3264.04	3681.93	4085.53	3634.98	3998.91	3114.16	3216.39	3059.25	2848.91
Adhfe1	3934.78	3776.89	3343.12	3061.86	2550.42	2207.86	3477.48	3769.51	2815.05	2528.72	4365.09	3809.16	2379.44	2949.1	3596.48	3399.79	3124.4	3086.73	4417.88	3809.48	1773.82	3456.96	2749.78	2592.38	3184.94	2835.62	4226.28	4712.71	5087.2	4955.32
Wipi2	9015.43	9093.28	9541.32	9058.15	8453.67	10724.1	9442.26	8987.19	8317.89	9692.36	9292.86	9351.22	8879.22	7943.54	8779.93	10093.2	8781.39	7227	7021.28	7283.18	9024.8	5386.56	7640.72	8294.27	8850.01	10113.6	7117.19	9041.32	8961.51	6139.65
Cyc1	37620	34940.3	34219	32638.8	32790.3	33956.7	37001	37059.7	42519.8	39222.1	44803.6	51709.3	29092.5	29833.5	41710.6	47189.8	47826.3	44994.2	60887.4	58621.9	34105.9	34397.9	35287.9	37832.5	39254.3	33247.5	53074.8	49524.9	45089.4	45988.4
Thumpd3	3315.37	3641.71	4413.91	3812.95	4781.62	4843.77	3945.44	4121.57	3911.29	4709.05	3859.37	4304.4	4329.09	4129.87	3111.9	3734.98	3099.8	3101.91	3198.34	2895.54	3450.88	3522.08	3021.08	3866.58	2627.08	3857.84	2493.58	3436.99	3662.76	3936.89
Unc45b	NA	NA	NA	NA	1620.45	1725.23	1078.57	1061.27	3325.04	3331.79	3888.08	4437.04	332.21	865.169	1729.83	1568.11	2787.42	2583.04	5610.22	5093.1	1728.84	1136.1	NA	NA	901.101	1488.2	5007.41	5736.66	3879.24	3435.46
Elf1	928.915	920.362	NA	728.751	851.355	1025.71	1097.57	883.321	761.51	1365.78	762.619	NA	643.049	NA	896.112	958.082	NA	NA	NA	525.621	626.669	NA	578.226	NA	855.893	NA	NA	1782.72	267.18	NA
Nrap	NA	NA	NA	NA	1242.11	NA	NA	NA	1712.29	2049.06	2797.82	2928.82	NA	NA	NA	NA	3194.74	3700.94	3089.62	2734.74	1926.56	1661.67	NA	NA	NA	368.811	2700.83	2731.18	1865.45	1240.83
Rnf213	2743.78	3130.91	3181.09	3121.66	2784.43	3515.04	3144.79	3680.19	2960.6	3441.6	3210.76	3052.11	3257.58	3150.52	1483.37	1862.96	1698.13	1590.68	1617.46	1759.33	1822.2	1849.19	1604.97	1927.98	1907.48	2022.07	1945.03	1916.89	2232.15	2148.58
Hyou1	23667.8	25113.8	24761.4	23588.5	22747.8	23524.3	24038.7	24560.5	24012.4	23029.5	22760.2	22678.8	22633.6	24599.1	17117.7	17172	17392.4	18149.4	17739.3	17131.2	17280.7	19363.1	16040.6	17642.5	16877.2	17596.4	18216.2	16995	19097.3	19596.8
Lama2	243475	238524	268457	249275	240673	242160	244658	246586	250564	236655	260041	273443	232232	227219	293218	285119	269528	272172	254475	243372	263160	253318	306397	305268	310182	290508	262028	256035	259273	270675
Fundc2	4053.51	3871.84	3211.15	5004.56	6637.56	3565.53	3546.24	4570.98	5340.06	6020.16	6396.41	5078.89	3656.55	4783.04	3965.28	3275.32	4714.68	4575.8	5858.6	7536.93	3709.19	3611.34	3012.12	2450.1	3197.13	4221.76	7215.48	7125.06	5057.88	6481.81
Cdk9	776.604	527.178	757.384	917.004	1425.57	1082.2	1184.57	1035.35	913.411	938.478	1015.32	842.237	721.023	1093.5	625.79	441.091	945.035	558.803	798.644	845.629	623.306	766.923	NA	801.12	788.441	335.756	767.099	647.64	685.14	949.123
Stk24	10073.1	9802.89	9933.97	8875.33	10478.6	10032.8	7829.99	9704.2	10219.6	10113	10418.3	9857.02	8605.59	8857.41	10142.9	10522.7	8339.44	8841.76	7400.85	7861	9974.56	10148.3	10093.4	9894.23	8871.99	9230.08	9693.71	6524.35	8906.07	9870.56
Stk25;Stk26	4948.5	4628.74	4844.41	4562.72	4045.64	4987.6	4650.57	5017.17	4586.38	3235.04	4551.81	2671.95	4552.84	4921.45	3903.59	2573.72	3566.41	2424.69	3359.48	2853.15	3579.12	3542.83	2803.67	4363.92	3926.62	3010.59	3048.08	2055.23	3367.14	3662.79
Lyn	7679.08	7051.2	8476.1	9839.95	7677.74	8021.59	9226.01	7748.51	8888.31	8988.48	8035.44	8568.12	7581.3	8380.01	8174.41	7951.06	8136.42	8099.24	7116.5	6771.97	7690.27	7777.99	7924.26	8087.63	7780.39	7065.63	7388.41	7826.75	8632.43	8351.04
Smg8	904.87	825.568	552.97	631.89	756.445	723.485	789.824	842.38	785.819	711.636	692.131	555.18	883.687	764.731	596.746	770.602	776.205	832.322	710.633	667.524	595.861	655.455	589.592	759.257	867.43	652.687	656.132	968.419	757.022	487.087
Tmem43	30890.3	28515.8	29129.4	28604.5	26519.1	26419.3	34613	32882.9	28708	29545.3	32251	31991	33275.2	30008.8	34349.1	33650.5	36428.4	34938.4	36372.5	34089.2	34606.3	30899.2	31407	35264.5	32403.8	31040.7	31978	33416	36042.9	37890.8
Dlat	64934.9	63703.8	61683.3	60839.1	69113	65814.6	71803.7	71126	73086.6	70449.3	89444.4	87846.3	61470.4	68865.7	94153	90310	105961	109637	115288	111786	92766.1	101192	73952.3	81969.3	83745.3	82982.7	109586	106652	96978.7	98408.5
Gbe1	18462.9	17814.6	16277	17918.3	16926.8	16536.7	16791.3	15790.9	18883.2	19244.4	20384.9	19296.5	18206.1	18262.1	23560.7	23986.8	24548.7	20998	25881.6	26192.1	17764.2	17963.4	22163.2	24958.4	23492.1	22603	22741.5	22909.4	25724.5	23297.4
Thoc3	1530.66	1614.89	950.032	980.176	1428.1	1454.9	1302.91	1116.51	1476.47	1057.27	880.337	1017.87	1235.13	1600.14	1062.55	886.905	1131.88	1073.93	842.267	948.283	1321.84	901.739	1184.64	767.619	903.497	1459.31	1361.19	1059.07	977.172	800.893
Gamt	28444.3	26452.3	26537.3	25788.9	23185.9	25852.1	23987.3	25925.4	29341	29822.7	25722.6	28192	27324.6	21584.2	18336.8	17830.8	15358.4	18887.7	20136.5	19516.4	17307.9	14221.8	19548	24390	21256.7	20853.2	20080.4	20425.2	19621	24782.5
Sord	19859.8	22010.5	22079	19831	17665.7	18065.7	19539.1	20622.7	18776.1	18087.6	19114.8	17289.2	21091.8	16604.8	30835.7	28547.9	24405.8	24244.3	29980.9	28439.6	27858.8	26541.6	32862.8	30573.9	32699.5	33570.7	31891.6	31148.2	30345.3	30387.2
Pgls	29396.2	27290.1	22974.3	20941.1	23635.3	20654.4	22189.9	27112.5	26568	25895.9	35429.6	31695	40579.4	36157.8	24061.7	21080	29246.4	27503.4	26501.7	25749	25590.3	28103.1	33637.4	32979	36974.9	32092.7	39871.8	39301.2	29553.1	27597.3
Acin1	7806.74	7379.59	7614.74	7800.98	6986.35	7586.22	6592.02	7769.04	7420.45	7435.09	6911.75	6729.1	8591.92	7785.53	5430.75	5203.69	4812.29	4983.82	4291.47	5022.96	4784.09	6390.35	4523.77	4663.94	5097.51	5141.02	5531.09	5352.68	5376.61	4944.51
Ddx27	560.293	243.671	143.018	NA	707.663	443.532	520.192	729.145	535.136	302.826	271.787	NA	269.565	344.105	NA	NA	NA	343.322	NA	NA	NA	NA	NA	NA	NA	559.731	NA	NA	NA	326.269
Nptn	80090.5	87350.8	86476.8	96497.4	55465.5	68133.1	56157.9	70529	93565.5	87069.2	67969.8	72165.3	74703.1	63968	97367.1	87168	86717.4	81059.1	84074.9	102762	65144.2	74182.8	83082.8	82550	103613	82851.9	85777.4	103342	89377	83120.5
Mocs3	4008.17	5566.94	6400.51	6028.62	5353.26	6839.41	6889.15	6494.87	6361.07	5691.24	6816.04	5253.04	7797.74	6117.12	3918.69	5983.14	4696.92	4516.83	3716.7	4921.88	4454.04	4070.17	3992.42	5240.73	3131.62	4554.23	3731.41	5267.88	4432.59	4909.94
Faf2	11448.2	12450.4	13148.3	14789.8	12352.8	13009.4	13025.7	14387.7	12177.7	13142.1	12794.9	12195	9792.13	9371.84	9749.43	9891.9	7317.79	9202.58	7982.13	9097.78	6951.61	9616.5	9146.3	9501.53	7993.83	8752.34	6770.47	9953.39	9478.6	9401.32
Nhp2	1442.89	1455.36	1340.79	2016.68	1882.56	712.659	1600.51	1309.24	1716.63	1909.34	1307.58	806.091	1070.23	2173.61	1181.79	670.747	NA	660.827	870.949	1700.65	760.847	670.45	827.689	964.127	579.918	1002.54	1266.85	1345.82	1372.29	1087.99
Fundc1	717.7	1356.33	979.705	1052.74	1045.95	1605.13	699.675	595.164	1606.66	1014.63	1206.53	1223	1529.96	828.44	1233.23	1143.92	1652.09	1692.6	1279.88	1867.3	1275.37	920.186	1630.22	406.556	581.669	1984.8	896.693	1164.89	1364.09	1201.02
Rnf25	2174.65	2461.75	2611.49	2389.9	1756.32	2390.69	1660.19	2907.33	1944.98	3027.28	2565.84	2705.16	2619.41	2475.7	3168.02	2972.14	2710.66	1966.43	3118.96	4400.78	1902.92	1752.67	1866.71	2490.72	2249.32	2214.93	1846.42	2334.82	2769.72	1587.06
Map7d2	17144.8	17232.9	19619.4	21179.4	21434.3	20036.7	16788	18359.4	18362.8	20047	17077.9	18781.1	17760.3	20469.5	22038.7	25141.7	24210.3	25207.9	22669.1	23298.6	27568.1	27251.2	25844.2	26258	26656.5	26400.6	21863.2	24737.6	21064.2	24288.2
Ppa1	89544	80140.4	60515.7	69302.1	66063.7	65474	54064.4	52689.8	56987.2	62755.4	68239.5	56148.1	62951.3	60717.8	63970.2	75071.3	63930.5	54960.5	62108.8	69517.9	60098	65026	60490.3	58944.3	65186.1	65304.5	67664.2	64517.3	74037.1	64411.1
Hint2	20370.5	20008.3	12870.4	18699.8	15894.1	16373.8	19951.7	14427.6	20780	9841.37	18402.8	21351.7	15358	15815.9	22988.6	15902.9	24853.4	23661.9	20379.7	23816.9	16757.7	12448.1	23142.8	19452.9	22769.8	20261.2	17075	20312	26923.3	28393
Mettl1	1189.13	NA	NA	NA	NA	NA	1333.4	NA	957.071	NA	NA	NA	NA	1757.38	NA	NA	NA	NA	NA	NA	NA	NA	NA	NA	NA	NA	NA	NA	1448.82	NA
Phospho1	13810.7	14293.2	12895.5	14711.4	18020	15601.3	11579.9	15192.2	17633	17313.5	15395.3	16135.9	14063	15390	18593.9	19983.6	20275.3	18204.6	19439.7	21986.2	20984.1	18971.4	18654.1	19896.6	18536	18680.1	19400.8	20824.4	20949.4	18226.7
Nup214	4075.69	3955.11	3263.22	3509.98	4433.17	4335.7	4614.78	4672.21	4349.49	4381.53	4512.92	3999.96	4071.23	3969.17	4068.27	3967.85	3526.88	3801.08	3018.69	3540.93	4210.9	2823.22	2934.15	3483.37	3114.97	3505.46	2679.12	3604.04	3216.45	3730.67
Pygb;Pygl;Pygm	117151	121935	117799	97196.4	219569	180349	150206	146306	279526	246897	342309	317137	145881	170470	291675	252953	307626	268891	643405	532405	227839	233422	198336	181333	236189	247427	803266	660935	452409	531144
Afm	51391.3	50455.5	44896.2	45848.2	44701.7	43763.6	52996.8	55058.3	45662.2	49268.5	67078.5	75012.7	65490.3	69291.3	47420.7	51294	23398.7	25104.7	38426.2	40647	33337.1	31561.9	67919.6	81261.3	96877.6	90009.7	91089	94364.9	89452.4	87528.2
Pdk3	9670.06	10090.1	10523.1	9817.66	11720.1	10070.3	10426.2	11895.4	11232.9	10312.1	10684.7	10538.4	11873	12897.9	9047.98	10805.7	12326.2	11573.2	9686.39	9126.43	13023.5	12093.1	10107.5	9859.74	10309.1	11699	7903.98	10559.1	11865.8	10065.8
Mindy2	10577.2	10110.4	7799.84	8869.65	9625.46	10923.1	9409.14	10751.3	11852.1	9716.84	9193.83	10003.4	9328.29	9531.27	9508.96	8722.88	8118.56	8566.38	6841.42	7709.33	7372.48	8307.83	11073.8	7523.02	7329.75	9258.56	8111.39	8905	8763.32	6881.74
Pzp	164286	159885	134328	116848	97755.9	95122.7	149977	148603	71910	68972.4	125497	120466	86019	84791.6	164249	146480	48149.8	48443.2	94536.8	93240.2	87896	86330.1	105806	108358	174366	166452	151749	143975	124859	132641
Eps15l1	10324.4	10923.8	10666.4	11062.8	11534.1	11497	11006.4	9751	11071.7	10634	11550.9	11833.6	10706.5	11969.7	9504.09	10309.1	11528.8	10292.2	9891.94	9341.4	10760.9	10172.9	11003	10296.8	9617.2	10434.2	9028.72	9741.16	9028.75	9376.15
Prkag1	6894.96	7144.41	6361.85	7350.42	7070.79	6343.87	7489.77	8094.57	7190.61	8066.05	8107.8	7754.22	7103.61	7823.78	7552.78	9365.82	8036.19	8657.83	9576.37	9179.52	7948.71	7429.8	7567.46	8544.92	7714.21	9966.58	9017.98	12113	8972.7	8609.52
Prkag2	2475.57	2200.07	2822.95	2140	1971.48	2866.89	2666.94	2231.88	2970.91	2382.44	3159.05	2551.26	2745.57	2979.21	3722.19	3553.68	3461.57	3543.33	3456.79	4007.41	3994.07	3806.36	2862.04	3197.31	3401.16	4304.54	2602.02	2812.63	3442.63	3426.88
Rtn1	24469.9	27599.2	24635.7	29301.9	28474.9	29123.7	23541.3	25432.8	25703.3	29256.6	24495.6	26125.4	26964.3	25780.1	21643.3	21127.9	21631.6	23140.8	20768.7	21326.2	24004	25464	23679.7	25110.9	23799.2	23597.8	22263.1	23908.4	21291.9	22245
Lsm12	7065.81	7440.74	6663.86	6829.75	6849.59	7170.56	5848.91	6643.23	7240.63	7234.35	7111.16	6438.92	7170.01	5742.37	4777.9	4349.35	4377.84	5412.61	3246.6	4588.4	3837.2	4867.46	4248.87	4214.33	4450.58	4417.17	4141.19	5418.66	4999.07	4185.73
Pxmp4	2729.61	2138.26	NA	4283.21	NA	NA	1188.95	NA	NA	NA	NA	NA	NA	NA	1454.33	NA	2345.22	NA	NA	NA	NA	NA	NA	1741.31	NA	NA	NA	NA	1881.83	NA
Mapt	63066.9	55958	60929.1	58317.4	58656.9	60950	52215.5	54034.3	55137.8	59995.4	50844.1	55576	67362.7	50532.6	79397.6	77877.2	85597	88436.4	77562.4	72152.8	79225.2	78783.8	84199.9	91040.2	90606	75647.1	84081.8	81577.5	79825.3	80813.2
Bnip1	5789.78	5861.58	6038.63	5764.65	6338.15	6465.83	6699.38	7156.34	6310.65	6384.88	6554.12	6606.3	4975.55	5962.96	5131.88	4836.41	5250.19	5050.67	5097.51	5358.57	4901.75	5204.42	4987.94	5295.09	4545.11	5543.01	4457.79	5409.36	5294.19	4405.08
Mpst	10559.1	10605.9	9510.75	10051.1	10028.8	9215.27	7610.06	9469.94	9910.26	10874.2	9995.53	10951.3	9338.76	8416.71	8682.51	9607.01	5614.45	8429.77	8809.5	8916.86	8049.55	8379.96	8246.71	8043.64	10043.7	8844.23	6894.55	8826.1	8934.63	7933.51
Bin1	25782.2	27450.9	28650.8	26667	26194	29259.4	24452.8	25846.3	35272.8	36068	34165.7	32350.5	26923.2	25679.9	35075.3	32666.5	37026.1	39744.5	54643.2	52061.8	29644.8	29051.5	29854.9	27188.1	31737.4	32891.9	43925.6	46196.1	38889.4	40480.5
Zyx	18689.3	18172.7	14405.3	11387.9	14850.8	14594.7	15471	14530.6	15893.4	16372.3	16023.8	17115.4	18780.7	18755.8	36219.3	33863.9	34411.4	36097.1	26915	28723.8	37737.1	34845.6	37132.2	31548.3	33145.5	31997.7	35500.8	34629.6	37482.8	36335.9
Spon1	2110.44	1986.35	2062.35	1417.02	1835.59	2784.12	1724.58	1647.15	2331.77	1859.36	2002.2	2440.98	2810.76	2976.27	2202.17	3584.54	2167.56	3148.66	3399.73	2770.86	2893.87	3011.47	3413.37	3451.4	3467.21	3457.73	4166.82	4276.22	5780.48	6403.1
Bag3	28697.4	27619.3	28446.3	26352	32699.7	33229.1	26645	24581.6	28554.6	30911.7	27552	26569.4	25642.3	24328.5	37267.9	38362.3	43222.5	39478.1	35598.9	41902.8	43718.7	42843.4	41521.7	43776.2	39427.7	40177	33389.6	34064.6	44744.4	43382.7
Map2k4	17887.9	16941.3	16353.1	15732.7	16246.4	17567	14389.4	15540.7	14701.7	17753.1	15357.7	18071.2	20264.2	17593.3	20750.8	22634.7	13330.6	20081.1	18144.5	19474.4	17301.5	20112.9	19809.7	22663.6	20632.9	20424.5	22503.4	22160.8	17569.8	19900.7
Arfgap1	4085.82	3838.49	4209.05	4099.59	4129.14	3721.14	2972.81	3654.79	3458.59	5140.29	3098.38	3019.13	5146.82	3686.57	2033.29	2602.13	2161.18	2816.73	2960.08	2364.35	2332.75	2174.48	1663.1	2249.32	2429.39	2205.34	1990.05	3421.58	3029.59	2950.28
N6amt1	1385.86	1417.1	899.087	1637.4	1712.89	1826.06	1297.28	1422.6	1669.34	2605.88	1551.3	1505.3	1682.87	1871.61	1313.99	2581.78	1437.99	1564.24	1338.52	2006.78	1433.16	1350.28	1817.05	2012.12	1990.52	1564.19	1049.69	1985.27	1691.64	1781.1
Tkfc	4513.88	5734.67	5516.28	6086.98	5144.55	6276.95	4749.75	5260	5013.75	5466.7	4129.5	4971.21	4558.92	5603.71	3044.44	3240.2	2929.7	3092.18	3407.92	3373.45	2523.75	3161.15	3406.68	3657.46	3275.4	3386.69	2726.16	3142.64	2940.29	3691.8
Dab2ip	2618.21	2517.33	2461.55	2559.53	2373.61	2895.23	2628.12	2698.36	2459.66	2506.91	2090.27	2694.29	2261.47	2789.09	3491.97	3110.96	2802.32	2578.17	2658.93	2624.21	3237.33	2944.65	3002.7	2828.65	2495.15	3090.75	2574.7	2702.41	3030.2	3003.43
Afap1l2	8900.41	9100.92	9027.11	10628	8797.3	8412.91	9562.4	9240.42	9091.53	9118.83	7564.73	7504.61	6932.02	7985.03	6161.49	6984.99	6991.73	6207.37	5725.52	6975.02	6756.18	6985.4	6736.16	6534.04	6428.22	6906.88	5776.06	6484.68	6653.14	6366.46
Nfasc	50637.2	50798.7	52211	54771.3	53419.5	49961.9	47574.6	48832.8	50973.4	49694.4	53590	50797.5	41732.1	46702.6	47706.6	45832.7	46467.6	45123.8	38884.8	41119.9	47127.3	43283.6	47764.9	50837	47769.8	51038.5	40026.4	42583.4	47038.8	41285.6
Cryz	10281.3	10154.1	9052.36	8078.77	9918.85	8873.09	7655.77	8101.44	9255.42	9195.56	9516.26	11515.8	10201.3	8438.52	14580.4	13778.1	12394.3	11349.5	14466.7	14664.6	12294.1	11827	11280.6	14001.9	14324.5	13199.3	14096.3	15433.8	11856.4	13759.2
Tars3	2821.87	3152.79	2667.47	3394.61	4038.95	4443.45	2749.47	3793.95	4522.86	4791.68	4664.19	4038.58	3725.86	2784.71	3487.47	3779.8	3716.99	3862.38	4889.61	5384.31	4211.86	3449.15	2784.77	2796.31	3127.44	4803.3	4695.18	5819.31	4093.24	4421.16
Psmd5	27040.9	27805.7	28739.2	25660.9	26717.6	27625.1	29816.6	27900.7	27265.3	27359.1	29594.8	30672.2	28021.5	30714.8	35860.3	33588.9	34595	32678.1	26423.6	30208.4	33723.5	35057.9	35554.6	32798.9	34151	33016.4	32688.4	32239.8	33022.7	32416.1
Urod	8727.55	8441.39	8963.99	9977.07	6796.05	7742.84	7973.21	8231.76	9432.08	9230.14	9282.79	9217.16	9047.64	9929.77	8137.18	8821.67	5920.9	6644.84	6741.97	6599.57	6289.85	7188.79	8359.63	7557.39	7481.95	8158.56	8448.49	8154.82	7159.76	6657.3
Tra2b	10891.7	11686.2	9972.82	12791.3	8532.24	8343.53	8121.47	10570.8	12756.8	10468	10949.1	9919.62	5383	5550.48	7422.85	5396.54	7037.05	5646.36	6579.79	7232.65	4187.26	4435.04	6681.64	6654.52	7588.16	5715.96	5710.45	4695.93	7397.5	8387.82
Aldoa	669072	633532	607014	564048	859430	872458	630066	691647	1222530	1186690	1413320	1543160	697601	718077	1200960	1137060	1036060	1086470	2635750	2361450	814114	836173	699130	740558	1175900	1078170	2560040	2247790	1740340	1913950
Git1	28566.6	29781.8	32979.4	31163	31321.4	30518.7	29738.2	31772	31845.4	31744.2	29865.2	32335.3	29654.9	30751.7	26304.5	30740.1	29566.1	28188.7	25696.3	25012.2	28000.3	28849.5	27180.9	28029.5	25724	27210.4	26370.3	24219.7	24260.1	23682.2
Git2	4007.22	3258.82	3608.86	4226.66	3632.47	4040.57	3095.25	3056.09	3607.77	2812.58	3301.74	3009.25	3671.66	3640.81	3688.43	4158.45	2963.63	2952.59	3167.67	3531.98	2834.52	2630.73	2384.14	2946.76	3479.45	3398.59	3299.99	2929.39	4061.41	2847.75
Ccdc22	6019.45	6980.8	5404.24	6558.45	6385.06	5978.3	6334.42	6699.7	6361.19	6528.19	6550.88	6422.61	5857.47	5967.34	5432.03	5981.36	4999.16	5131.7	5354.57	5273.12	4664.47	5080.59	4983	5440.41	5157.4	5450.88	4278.6	5048.89	5511.42	5585.25
Dnajc2	3410.26	3356.16	3228.58	3420.09	3295.78	3178.2	3283.41	3714.9	3878.76	3279.3	3334.77	3267.94	2322.14	3390.36	2230.82	2942.33	2710.13	2796.58	2660.83	2821.48	2625.24	3285.52	2651.52	2908.7	2369.3	3257.6	3885.2	3050.7	2857.06	2863.78
Ubr4	7699.6	8485.83	8065.03	8514.15	8370.44	8807.15	8655.92	8875.27	8739.69	8842.79	7761.54	8504.93	7403.2	8262.73	7398.5	7384.3	6675.78	6430.59	6360.49	6726.03	6960.89	7015.96	6278.45	6685.66	6316.07	7554.91	6791.55	6527.42	6181.37	6123.14
Sox10	1816.27	1954.55	1751.1	2311.44	1840.35	1399.97	2022.81	1674.6	1794.65	1493.49	1302.17	1696.69	1745.66	1537.21	972.889	831.716	1072.06	1546.5	1100.36	1549.56	706.533	986.908	1093.11	1347.5	1412.18	1150.57	1560.65	1444.51	1162.59	1527.48
Ran	166869	148344	151793	139569	130059	131395	144604	153770	150814	158870	164361	165428	142446	160491	190961	170503	171099	187348	161932	168780	177270	181514	181171	176028	180664	162492	174999	172997	166857	182421
Nfyc	1445.97	1263.63	1329.34	1304.29	1263.49	1447.7	1063.88	1276.86	1105.95	1101.02	1162.88	1087.12	1218.07	1058.52	1161.98	1044.98	846.143	NA	1192.31	719.084	797.764	NA	1012.13	846.244	1248.18	1288.02	1127.25	NA	1205.3	1158.56
Etfdh	38632.6	37731.4	38391.5	34111.6	38436.2	39337.3	41690.2	40915.9	39869	40508.5	48857.2	49792.5	35391.4	40648.2	51488.7	45961.4	62275.9	60321.6	56741.7	54605.3	49626.3	49228.1	42506.6	39850.2	43671.5	43750	51801.4	50745.1	47676.9	46302.4
Timm9	2720.94	2473.85	2378.23	1728.15	2318.09	2656.57	3066.48	2918.11	2616.99	3221.44	2913.53	2815.6	3288.01	2540.53	3419.98	2931.8	3615.93	4647.73	4240.73	3195.83	2864.52	4163.23	2727.51	3394.75	2707.6	3318.6	2745.86	3299.33	3407.87	2470.36
Ino80c	467.94	597.538	286.607	247.855	325.185	718.197	442.227	321.021	231.423	905.415	338.53	153.992	NA	548.621	NA	79.4432	383.528	482.854	362.059	NA	566.005	343.715	NA	544.853	548.828	156.315	381.521	191.244	642.401	224.336
Hk2	4796.23	5057.42	4740.42	5112.71	5336.14	6930.18	5240.85	5254.22	7901.34	7519.76	11147.2	11047.4	5542.89	6015.07	7985.97	7866.78	11938.4	12194.2	21323.4	21189.6	5852.38	5333.39	4429.17	4302.74	5922.12	5127.04	15354.1	15395.7	10389.5	10172
Hk1	63438.1	60725.5	68370.9	62471.9	61172.6	56185.3	67018.9	64279.1	65243.7	61425.4	61752.4	60097.3	66192.1	62841	79138.2	77133.2	79048.9	74933.6	72335.6	69000.4	77354.8	74110.8	74470.3	76842.5	78848	75516.1	75584.4	68829.5	73095.5	71128.1
Lamb2	279705	264704	264672	245110	245235	246081	249066	253106	244117	237618	282736	296940	261685	268480	526877	502521	512937	505436	484981	472281	478857	457453	514176	515136	463260	437522	457417	445051	447542	446945
Acad8	6822.95	6074.97	6094.14	5951.04	6894.84	6779.77	6597.84	6412.25	6822.28	6785.78	6491.28	7948.55	6397.26	6945.89	6460.84	7366.06	6903.43	6968.82	8090.88	8294.54	5992.65	6991.93	6347.09	6183.85	6406.26	6391.16	8307.04	6838.68	7070.67	7103.42
Hspbp1	4731.16	4236.77	4496.98	4384.23	3646.28	3824.04	4147.52	4065.86	4302.16	4797.89	4132.67	4354.65	3785.43	4174.44	4333.82	5933.78	5027.88	5140.5	3858.09	5495.94	4567.08	3749.8	3675.04	4271.83	5191.66	3943.01	4169.66	4780.32	5032.75	3693.48
Aldh3b1	5929.72	7134.89	5787.05	6867.71	5774.02	6201.25	6159.29	6691.52	5936.73	7490.24	6645.95	5983.11	7344.17	6084.92	7379.32	7524.65	7990.2	6960.8	6629.46	6896.38	7863.38	8844	7164.53	7971.4	7630.41	8280.89	6528.32	6511.13	6360.39	6598.36
Sync	2540.99	2213.7	1643.07	2763.03	2951.84	2702.94	2272.59	2546.63	3138.32	2853.26	2684.99	2651.96	2485.17	2463.35	3627.24	4027.83	3373.98	4087.92	3886.4	3954.35	3012.84	3629.84	2857.21	3577.22	3702.15	3831.32	3368.83	3717.99	3325.76	3817.38
Lamb1	329354	324945	382314	362719	343451	351276	357595	345462	356753	353802	353815	371774	311338	334728	342312	333888	324164	328413	286915	289037	306889	317251	329601	342657	350200	340074	321702	321727	316953	321767
Txlna	3247.81	3098.76	4133.35	4399.02	3748.03	3625.18	2363.58	3674.17	3518.57	3914.03	3351.46	3921.77	3394.76	3841.32	1493.5	3117.17	1877.72	2566.86	2367.82	2013.67	1928.48	1992.86	2513.34	1987.31	2535.62	2678.24	2477.58	2692.85	3083.7	1999.98
Gap43	2539.66	1363.88	1178.51	2141.81	819.698	1361.34	953.204	1150.72	929.218	2329.93	1031.5	1042.48	NA	1814.04	771.151	356.011	399.39	NA	NA	NA	846.456	1604.62	1205.35	1307.97	928.062	642.673	1146.84	NA	459.132	NA
Csnk1a1	8403.12	9458.94	9343.6	8199.36	9275.67	9658.46	9889.79	10237.2	9900.43	7792.58	8675.42	8168.34	9970.04	8863.33	7850.09	6381.38	7639.5	5723.26	6742.97	4567.72	5760.55	5322.47	7415.33	6895.03	6448.02	7277.99	7050.41	5715.16	7647.21	6746.93
Ddx19a	11014.9	11560.3	10650.1	8979.56	11327	10997.1	10543.3	9002.57	11633.2	9525.67	10584	10746.5	11832.9	9686.89	10094.5	10516.8	10020.1	9519.1	11587	9834.69	9422.04	9120.83	11417.4	10272.6	10637.3	10543.2	10239.2	9895.45	11577.5	10393.4
Asap3	NA	NA	698.57	675.613	710.972	527.639	NA	NA	686.055	NA	571.443	527.708	NA	488.608	NA	695.215	NA	272.581	NA	NA	NA	NA	NA	NA	NA	NA	661.63	NA	360.724	NA
Slc16a1	85349.9	72507.6	75648.1	68278.3	77426	73158.6	67828	59576.6	60447.6	62216.7	56696.8	54623.9	70671.3	55512.7	61278.6	66994.1	61201.8	66453.2	54649.3	53570.2	59508.5	57742	65419.9	65862.3	63861.1	60884.4	74547.6	62324.8	68541.1	71432.4
Ldb3	6124.58	9609.49	4781.2	5442.42	37357.8	39440.1	11192.3	10422	80443.2	81849	115351	118605	5963.68	5918.86	64921.7	75109	127348	130516	251101	235895	34451.3	37863	2446.95	2467.2	38916.9	43968.1	222724	205174	131369	134659
Gpsm1	5540.67	7124.33	5548.63	5644.56	7311.96	7054.86	5995.28	6320	7094.89	6777.74	5239.03	4866.95	7035.39	6899.54	6455.87	6006.56	5596.58	5795.17	5787.39	6286.77	6238.86	6054.57	5598.94	6349.98	7328.76	6677.18	5076.65	5018.98	5389.72	5372.14
Clip1	5632.66	5410.6	5604.56	5490.69	6226.3	6484.38	5569.16	6063.87	6823.45	6229.75	6536.47	6774.91	5330.52	6050.25	6632.81	7091.74	8279.55	7071.96	9582.58	9358.85	6973.17	7770.75	5402.96	7055.58	5717.48	6320.85	7688.19	8259.67	8811.29	8056.87
Vps53	5870.96	6692.43	5852.7	5545.67	6425.19	6559.73	6662.17	6788.44	6134.66	6183.87	5611.96	6668.18	7722.05	7025.12	4706.13	6501.71	5901.34	6387.23	5400.34	5353.76	5051.02	5524.13	5508.4	6073.52	4939.22	6147.17	5983.15	5603.59	4884.92	5457.51
Kank2	16513.6	17336.9	16279.4	15601.7	16946.2	16587	18221.6	17363.3	16874.5	17420.7	15716.3	16337.1	16848.1	17593.6	17689.6	16624	16305	15435.9	17193.6	17187.8	17444.2	16744.9	15761.8	16150.7	15694	17029.3	16411.3	17284.7	17990.3	18612.8
Taldo1	150927	147168	149523	138562	144294	135830	140765	138411	148098	137516	142632	141874	146209	135671	135033	129020	129873	127012	130400	121176	127124	121426	138040	140684	141222	126822	142007	134591	143618	145528
Rars1	27043.8	27177.1	28964.5	28633.5	28818	30602.5	30798.5	30253.9	30589.9	31777.6	30938.1	31257.1	28947.5	30405.6	27634	27250.3	27581.6	27810.1	27064.1	29354.4	24379.3	24253.8	24128.2	26488.3	27109	26864.5	29271.6	31467.1	28415.2	29634.3
Agt	9047.72	9969.33	5722.2	7878.62	9463.54	11176.5	9442.47	9868.1	8227.12	9528.54	9661.13	10998.8	11736.4	11454.7	6305.35	8014.21	6744.99	7719.6	8096.82	10498.4	8671.42	10949.7	7866.18	9816.88	9301.16	10382	10151.6	9880.1	7898.82	10408.3
Ccdc50	4774.16	5433.79	4470.29	5617.85	3256.97	5305.4	4446.65	4867.28	4081.85	5114.9	3783.29	4767.97	5405.72	5283.27	3188.91	4992.29	4686.17	5550.5	3400.58	4930.64	3037.32	3811.44	NA	3994.16	3509.41	4047.38	4060.82	4843.65	4954.07	5807.65
Mbnl1	17387	11701.2	10448.6	17430	10364.4	12792.6	14780.3	14674.1	9455.63	16584.8	8927.98	13129.8	9008.82	10282.4	8327.39	11246.4	NA	16675.7	12498	13174.8	14387.7	14252.6	6615.47	13749.3	8727.3	9765.89	12426.9	12065	16766.7	6780.95
Mboat1	2096.4	1969.99	1463.06	NA	1804.07	1151.72	1548.71	2265.96	1661.67	1396.24	1788.02	1410.96	3117.23	2195.5	NA	NA	NA	NA	NA	NA	NA	845.126	NA	NA	1028.37	1027.92	476.69	NA	1325.26	NA
Tbcd	12310.8	12852.3	13473.7	13237.2	14527.9	13277.1	14048.6	13013.9	13759	12783.2	12992	13956.2	12575.3	12892.5	12874.4	13249.9	12277.9	12239.5	10899.9	10076.4	12755.5	12975.2	11888.7	11966.9	12467.6	11701.2	11280.8	12095.5	10815.6	10553.9
Commd10	5219.62	7397.85	6635.31	5399.63	7967.53	6458.52	6427.59	7284.58	7122.81	5232.45	6485.45	6607.47	6182.74	7713.11	7203.87	5810.85	4706.78	6466.04	6943.54	3857.77	7339.33	6156.52	4643.42	4841.68	6870.1	5654.95	5624.7	4622.49	5861.35	5973.33
Vti1b	6085.98	6181.42	6005.72	6726.53	5705.92	6676.68	6335.39	7137.52	6206.24	6723.94	5853.4	7116.44	5582.41	6202.65	5658.24	5864.09	5733.13	5606.19	5660.4	5468.93	5395.6	6305.08	5818.14	5746.07	6526.21	6562.04	4950.22	5327.58	5398.28	5861.04
Macroh2a1	72608.4	62670.6	65871.4	73599.4	62444.5	73808.5	63261.7	69237.8	72558.3	72898.9	62928.2	63206	62108.6	59563.6	64913.9	72094.9	63302.4	51760	61791.9	71014	50297.4	59942	61761.4	57119.2	61939	64157	70132.9	62794.5	61759	73887.8
Acot7	125621	129578	117030	113528	113390	109026	100025	107015	107503	102883	110761	108537	103761	109293	141983	136153	141261	124267	139568	136692	132974	141569	156625	153576	162799	145134	140765	126174	138031	136175
Prkar2b	19530.3	20046.4	22299.9	21469.1	17925.4	18519	19939.2	22289.3	20476.3	18993.8	21889.4	22611	17180.2	17932.3	20872.3	22652.5	20430.3	17720.5	18293.1	19255.3	19196.6	20917.9	22412.5	22214.3	17523.9	19752.3	19569.8	19725.4	20108.9	21021.3
Tubgcp2	2357	2462.99	2202.34	2481.08	2342.58	2708.39	2664.8	2577.74	2561	2633.63	2319.21	2481.48	2258.39	3332.48	2011.61	2020.52	1919.38	1950.32	1307.75	1898.95	2010.6	2331.88	1319.81	1947.48	1590.84	1841.12	2042.86	1968.16	1968.3	1808.5
Pcyt1b	3557.85	3360.47	3784.34	2759.36	4766.73	3827.92	4295.16	3653.1	4131	3998.03	4509.51	3495.33	6141.09	4387.6	1876.13	3641.95	3469.43	3234.43	4082.63	2676.13	3986.65	3193.35	3533.34	3762.6	2541.6	3902.93	3022.31	3253.2	3583.3	1787.59
Ptpmt1	2621.97	3365.43	3296.7	3782.98	3822.1	3417.66	3562.19	3834.53	3504.58	3161.2	3371.68	2976.06	4196.9	4443.01	3458.55	3648.54	3727.71	2623.98	2340.01	3185.1	3419.17	3223.15	3555.94	3416.63	3749.66	3366.52	3867.77	3209.43	2423.72	2771.91
Vcl	124143	123213	110181	102807	107224	109048	104447	107436	107421	108328	119412	128525	110880	121900	162204	154626	173678	175270	164890	165272	170343	169634	165027	178137	155327	155726	163151	155456	160443	173964
Crot	7486.74	7920.49	7163.31	7991.22	7713.43	9865.7	7494.63	6924.15	8457.84	9658.38	7496.45	9361.67	8905.18	8973.27	6961.4	8084.81	6999.01	7642.15	7825.03	8848.87	6633.32	6859.52	9139.26	7630.75	7830.05	7343.37	9179.47	11239.5	8222.09	8268.71
Tfe3	446.633	859.909	942.292	1036.68	857.863	830.292	623.092	1025.69	569.303	1752.69	805.871	1052.37	1119.7	1004.36	573.46	NA	NA	723.485	NA	1050.8	NA	839.752	526.425	1154.64	627.276	747.696	NA	898.86	917.89	1075.62
Clstn1	8363.19	8550.73	8989.7	8315.84	8761.02	8650.37	8599.51	7727.27	9210.19	8419.57	7792.06	7746.93	6907.26	7191.32	7237.33	6782.19	7922.29	7986.84	7569.38	6711.9	7248.56	8183.6	6595.73	7315.92	7796.29	7616.99	6795.41	8470.83	7634.79	7684.15
Itsn1	9619.41	10151.7	10766.3	10985.4	10897.2	11274.6	10149	9947.24	11473.3	10795.5	8748.35	9390.1	8162.04	9997.15	7697.22	7483.89	7845.84	7236.41	8354.08	7805.12	8792.88	9192.54	7386.13	7692.64	7529.32	8043.38	8184.35	7053.43	7865.19	8120.41
Rnf214	5180.66	5948.94	6097.34	5924.25	6119.56	6490.59	5367.51	5912.03	6265.23	5945.74	5095.89	5366.87	5404.75	5796.54	5362.06	5604.19	5565.12	5462.73	5286.05	5090.05	5689.24	5684.48	5704.99	5480.22	4321.78	6143.45	5738.17	5695.1	5715.65	6396.65
Dmac2l	1279.04	1892.11	2339.19	2186.65	2490.5	2609.21	1010.86	2174.16	2597.88	2794.82	3176.87	2117.66	2423.39	2292.37	2300.18	2105.48	2645.59	2921.66	2373.62	2405.65	2783.38	2358.45	1859.17	1539.2	2132.16	2200.73	1910.22	2776.52	2570.81	2441.03
Slmap	12967.9	13602.7	10700.4	12093.5	11184.1	11473.9	11539.1	12417.3	11269	11472	12745.6	12724.6	12528.7	12628.3	12213.8	12502.1	11165.6	12699.9	11777.9	12916.5	11283.1	11307.8	10935.5	10681.4	9666.4	10720.1	8839.42	10877.3	13086	11810.3
Sh3pxd2b	2827.46	3405.67	3392.99	3551.74	2947.21	2826.89	2878.81	2656.31	3262.79	2626.82	2410.85	2588.11	3005.22	2951.47	2197.63	2030.89	1555.11	1632.93	1955.44	1896.15	1609.22	1512.92	2405.97	1965.49	2421.11	2568.32	2257.96	1563.29	2543.49	1863.73
Akr7a2	21434.8	23142.8	19286.6	22534.8	17891.9	19292.7	17595.2	20546.5	23478.3	22243.2	24133.2	21215.4	16902.9	17392.9	21824.3	24747.5	20929.2	19908.1	20417.4	24782.2	21135.4	19992.8	20841.3	23416.8	19436.8	22025.2	20767.3	21581.8	24645.7	24547.6
Adsl	26512.2	23804.3	22286.5	26974.9	23298.6	24286	21143.5	21494.9	24977	27265	25800.7	26708.4	22925.6	21328.2	23660.9	25096.3	20851.9	23865.9	28205.1	31201.4	21179.5	20655.5	21299	20949.8	25071.8	24069.9	33169.2	37429.5	32330.5	27985.2
Dnajc8	19581.5	18344.9	18673.4	17339.6	20575.3	17829.2	18109.2	16812.6	17040.7	16932.4	19038.7	16256.4	19597.9	18440.2	18203.5	15603.2	14204.1	14488.8	13559.1	15653.6	10586.1	17695	12279.7	18347.8	15682.3	17670.5	16842.5	17070.8	17279.5	19388.8
Anxa4	69953.9	70710.4	70426.5	74259	62175.3	66790.5	68304.2	67333.9	65403.4	66996.4	69597.7	71397	69516.3	66011.7	101391	104596	95352.1	100160	97879.7	104391	95394.3	98646.2	106483	110908	101556	99920.4	102154	102890	98701.1	110141
Acsf2	18344.3	18608.8	16936.8	17306.7	18508.6	18443.8	17003.6	20161.8	17777.8	19824.6	18749.9	19379.7	17672.5	19079.3	14968	16755.2	16159.7	14570.4	15308.4	14501.9	16873.9	15883.3	18562.7	19528.5	14750.9	15898.3	15121.7	15463.7	15784.3	18649.6
Iah1	94073.9	89323.5	81745	71088.4	84952	73037.4	83107.7	85071.6	88144.3	84463.9	94357.3	86780.9	107735	89522.9	83986.5	75021.9	99413.2	88373	91102.3	71644.3	81967.8	83270.9	85855.5	92575	83330.6	89567.5	87836.7	87876.7	96785.5	90798.7
Cops5	14451.4	12641.7	14320.7	13200.8	13687.9	14587.1	14415.1	13564.9	12209.9	13013.2	13308	13981.4	13507.8	11544.3	13464.8	14392.2	12722.4	13485.9	12600.8	13403.4	12997.1	11468	14535.4	13946.7	14801.5	14569.6	12862.3	12991.5	12592.7	13442.9
Cox5b	32383.5	30978.8	41382	35376.3	30603.2	32158.3	35373.3	40469.5	38898.7	35897.9	45874.5	45540.3	40800.2	34487.6	46001.4	41848.1	58098.9	63907	62763.3	52055.2	42985.4	47272	34905	32211.7	48106.9	39878.7	63288.8	55824.3	49806.7	47172.8
Dlg1	12542.3	12360.4	13194.8	13208.8	12064.7	11907	12059.3	11893.3	13439.3	11778.8	12202.7	11462.1	10651.7	10595.6	12686.2	11111.4	10928.9	11722.1	10740.7	9869.21	11552.9	11260.7	11459	10572.9	11804.5	11787.1	9472.9	9809.85	11286.8	11312.7
Eif4b	23625.7	23317.7	23839	22896.2	21720.6	22318.6	22334.1	22084.2	23294.2	24102.8	22483.5	20780.4	26138.9	21687.3	18122.2	23006.9	21558.7	22023.1	16931.4	20034.9	19589.2	22023.8	24919.1	22200.3	22285.6	23664.4	23448.6	22981.7	22926.6	24546.1
Senp7	906.856	1199.05	1088.15	1067.38	1060.46	863.255	1009.02	877.907	997.66	1083.8	832.972	1009.25	1493.33	952.408	954.362	947.566	676.141	496.961	701.203	1142.47	860.052	518.193	1225.53	825.542	608.379	863.42	718.382	1113.35	722.588	644.19
Supt16h	3853.12	3579.56	3949.48	4477.12	3120.24	3482.53	3875.17	4347.91	3704.69	4330.45	3404.93	3742.5	3693.25	4042.08	2782.95	3370.47	2362.81	3192.89	2941.24	2945.72	2787.22	3156.12	2151.24	2826.66	2830.66	3020.49	2621.89	3080.94	2205.21	2705.75
Acsbg1	521.787	763.37	883.103	989.5	855.718	827.917	777.201	1120.13	751.964	827.801	871.185	818.562	813.078	556.718	505.463	771.439	795.072	925.811	803.813	1069.84	842.472	926.988	929.081	764.943	648.618	950.148	531.551	790.775	810.856	750.034
Stra6	5070.54	4755.68	4682.9	3202.48	5591.69	3903.46	5219.23	3866.92	3867.83	4185.75	2006.46	4258.57	3756	3755.63	4225.46	3153.93	2808.04	2992.69	1771.89	2086.32	3686.58	NA	4931.71	4940.59	3829.54	3259.34	2328.87	1832.81	2617.92	3374.74
Mocs2	5234.32	5682.07	6271.66	5403.88	5200.46	5021.48	4810.97	5838.79	5649.82	5291.82	4355.96	4635.74	2345.02	4624.56	3797.69	3776.08	4393.78	4111.63	4084.68	4185.51	3819.17	2544.53	4202.38	4019.21	4285.29	4074.59	3354.77	4388.92	4810.12	4052.93
Dbt	14895.5	15183.1	12542.5	13060.9	12440.3	13079.7	14094.7	15961.8	13650.9	14249.3	15845.3	17057.3	15028.2	12201.4	15994.5	15466.9	15314.6	17037	18788.6	17308.6	15219.2	13795.3	14301	12748.5	12451.7	14771.4	17299.6	17892.6	19089	16925.3
Cast	15343.8	16603.5	15388.1	16065.3	13411.5	17621	10127.4	10681.4	13942	12922.9	11725.3	11648	18784.4	13940	11862.7	13637.7	13246.9	12681.7	14447.4	13871.3	12184.2	12351	14185.3	14484.3	16599.7	15292.2	15314.1	18722.6	15840.6	17404.1
Sdhd	2556.02	4283.01	3706.88	2719.77	2451.13	3397.16	3603.54	2266.06	3890.08	3952.84	4000.62	4002.9	NA	2989.8	4039.02	2677.19	2991.94	4448.98	5078.44	5494.97	2284.7	2397.56	2482.24	2537.73	1826.71	4079.69	4893.69	4832.67	3201.45	3530.59
Klc4	2953.65	2895.16	2489.42	3103.93	2723.49	3426.2	2993.15	2480.73	3026.97	3170.97	3028.56	3039.73	2467.85	3006.69	2642.14	2621.86	2393.18	2143.92	1922.9	2195.21	2151.23	2566.04	2474.22	2220.2	2735.36	2885.89	2409.24	2578.61	2329.71	2794.88
Itpa	22978.8	23579.2	20930.1	17196.8	19015.2	17337.8	15416.7	17489.7	18000.5	18442.7	21287.2	16855	16397.8	15898.6	22508.5	18488.1	16546.6	17637.6	19915.8	18512.5	17031.2	16039.4	19862.2	20753.9	18610	21470.4	26000.6	19317.3	21728.4	22156.2
Synpo	3568.07	4027.42	3128.01	2576.51	4047.16	3572.5	3474.56	3115.01	3346.02	3656.64	5344.19	4016.57	3412.1	3634.18	5022.37	5998.5	8993.2	12519.7	9344.9	6332.15	5377.96	6118.54	4387.91	3577.27	4011.49	3199.98	5076.28	7242.44	6018.34	7134.37
Sh3pxd2a	5823.84	5666.42	6321.44	6836.12	5673.76	6088.8	5607.97	5784.3	5706.64	6232.55	4920.8	5084.42	4403.46	5041.05	4902.34	6466.76	6474.96	5025.58	5195.56	5110.47	4610.96	5597.55	4707.4	5796.31	5759.95	5812.61	4349.52	4636.85	5009.14	5005.47
Cpe	8830.59	9168.64	8658.5	8603.53	7591.68	8512.32	8181.66	8088.1	9845.13	8305.38	9749.73	8555.37	8482.03	7244.76	9017.07	8666.61	8515.67	9181.2	7848.84	6389.5	6692.05	7964.17	10219.2	8638.45	8744.39	8770.67	7941.41	7630.91	6855.63	8134.31
Arhgap21	660.803	879.186	904.063	928.74	873.451	677.915	831.267	730.995	737.212	916.983	547.098	865.901	823.558	732.529	526.905	977.148	994.925	786.695	729.34	798.282	1048.98	576.438	798.571	737.098	618.023	606.807	331.113	610.612	743.974	410.866
Hcn4	4487.85	3592.84	3761.19	3452.79	3686.5	4062.41	3336.54	3200.41	3300.24	3632.87	3250.89	3327.35	4100.43	4298.77	5348.25	6341.08	5762.86	6721.63	5547.78	5200.62	5018.85	6531.64	4932.99	4745.52	4334.63	4768.21	4557.77	4820.2	4950.09	4834.54
Golga5	3143.34	3236.11	2948.53	3209.92	3363.87	3422	3241.77	3343.49	3441.53	3288.3	2742.69	2884.6	3003.67	2810.94	1569.93	2052.63	2133.78	1934.38	1978.37	1984.54	2178.97	1887.28	1581.59	1758.49	1755.07	1790.67	1658.75	1957.5	1762.6	2155.18
Capn5	16208.4	15498.1	17884.1	18583.5	16360	16904.9	18204.7	17302.3	17526.3	17312.1	17772.4	17891.5	15222.7	15480.5	17385.5	18024.6	18044.4	19086.4	17500.3	16171.6	15914.8	16252.1	16919	18004.8	17560.2	16681.9	16158.6	17246.2	17015.9	16524.7
Nup50	2027.03	1662.17	2059.08	1913.99	1628.72	1948.16	2225.33	2070.1	1632.01	2117.39	1600.34	1578.95	1936.24	1607.13	1169.86	993.859	1434.65	1005.28	1381.34	1050.95	1339.47	1378.24	1387.01	1145.53	1215.03	1664.39	719.402	1184.79	1240.86	887.779
Map4k4	8551.68	7760.08	8852.09	9077.96	8126.18	8361.56	8493.18	7736.76	7394.69	7988.95	6517.31	6413.1	8270.45	6852.44	4586.32	4852.09	4107.98	4582.14	4620.45	4369.93	4926.85	4551.19	3264.89	4525.93	4793.22	5049.32	4333.98	4570.19	4002.94	4473.59
Prrt2	1734.81	NA	2437.4	NA	NA	NA	NA	1209.34	NA	NA	3142.64	975.364	3452.42	NA	NA	1741.32	NA	1898.04	NA	NA	2274.21	NA	NA	NA	2969.96	NA	NA	1878.68	NA	NA
Abhd16a	8299.48	7900.55	8121.99	7830.34	8389.79	7486.24	8855.01	8715.56	8255.56	8937.41	7460.55	8531.11	7737.51	8083.18	8220.54	7841.36	7665.12	6910.95	7903.77	7701.06	7736.34	7697.13	6937.03	7270.38	6989.5	8150.35	8246.21	8022.91	7875.47	8206.59
Ppp1r2	10227.6	6522.72	9864.13	14786.8	8004.73	11229.1	8332.22	5469.04	9634.17	15533	4278.45	8234.14	8988.65	10216.8	7006.91	14652.5	9691.99	11263.1	8984.55	11649.7	7160.94	10741.1	14310.6	9447.41	10057.5	11026.2	5040.97	19225.9	6572.24	14938.7
Tppp3	313679	302167	298831	269175	309812	304510	266061	271610	306059	300258	268375	277458	251579	301442	506514	472076	539234	521350	373396	342132	532687	543969	512496	534159	581794	539810	475200	468327	509511	521403
Lxn	100347	96742.6	101658	87585.1	97387	92102.9	92868.8	90095.6	99524.1	93349.4	106282	106246	100864	104410	120590	102394	108871	115833	108236	106320	119143	121018	141230	146900	129827	130462	133025	119055	119297	119847
Pfdn1	2443.98	1676.66	2284	2998.91	2040.01	2016.71	2218.34	2008.23	1973.82	2470.82	2574.44	2634.35	NA	3588.97	2939.33	3762.72	2742	1846.81	2972.22	2662.58	2545.05	1931.84	3988.57	3537.22	2960.19	4803.57	3204.07	3114.24	2932.78	2747.17
Sema3b	7832.84	6540.13	7070.13	7604.35	8732.25	6964.33	8239.16	8494.53	7983.78	6914.27	6664.45	7363.27	6507.1	6919.45	5810.08	6282.22	5445.26	6170.79	4520.99	5894.53	5786.75	5185.04	6391.9	4690.41	6148.95	5585.78	5848.54	5646.15	6875.37	5471.81
Kif1a	15686.4	16485	18615.4	18871	16759.2	16658.8	16660.5	16997.3	17425.2	17226.6	14363.4	16350.9	15661.7	16551.1	16884.5	17370.2	16771.7	15913.8	15732.2	14302	15767.7	16180.9	16034.6	17901.1	16648.5	17561.7	15426.7	14501.2	15285.7	15475.6
Lama4	255520	252148	280936	232066	245023	236195	252067	235664	256638	238191	249308	249823	227845	235020	303638	289968	291079	272884	285260	259764	274552	265285	278334	278903	282438	257541	266475	256134	266554	261102
Pdlim3	2722.6	3277.95	1503.26	1315.1	3412.59	3687.67	1788.91	1882.55	6415.51	7628.41	10879.4	11042.8	2915.12	2837.88	7593.66	6740.24	5749.8	7683.9	13464.1	13515.3	3696.46	3679.43	1553.37	1745	3296.59	4375.75	11871.4	12445.7	13698.6	13511.7
Strap	26072.9	26271.8	27834.1	24568.8	25992.8	25846.8	25829.1	23747.1	27896.1	24380.2	28017.4	25961	26003.3	23306.8	27107.6	28485.6	24997	25304.5	28856.2	24824.6	27882.1	24662.9	30088.3	26347.4	27582.2	26876.2	28561.3	26607.7	27481.7	25833.8
Hif1an	778.533	451.117	751.943	534.321	820.108	674.371	858.257	644.607	976.989	1011.05	804.878	565.222	718.314	471.138	1134.32	639.396	514.313	572.355	728.97	505.241	466.952	487.021	452.462	342.431	667.838	525.239	626.76	726.654	661.088	605.01
Eif2b5	6564.49	7147.9	7013.83	6596.92	7095.24	5813.97	7426.47	7374.53	6852.82	6160.55	7408.97	6329.96	6781.71	6479.81	5948.6	5919.28	5712.1	6317.61	6646.32	4868.55	5628.1	5594.47	5747.05	6022.77	5529.86	7269.44	6996.25	5468.08	6771.23	5603.95
Nucb2	10041.1	12471.5	9493.26	9474.78	10370.9	10195.9	10569.7	11354	10608	9212.74	10873.6	10775.8	9175.83	10889	7472.38	7903.88	6325.71	8481.41	7740.69	7301.47	7599.44	7802.68	7677.05	7714.18	6276.02	7905.46	5887.41	7808.56	8702.79	7935.82
Unc119b	7412.48	7487.3	8896.95	8053.47	8117.73	8075.63	7267.7	6393.6	7926	8624.92	7969.81	8029.24	7861.86	7170.6	6201.79	6122.03	5945.01	6086.19	5607.46	7754.16	6515.48	6167.79	6041.02	5433.59	6372.87	5955.53	3260.88	6635.86	7024.13	6215.49
Pdia6	68157.9	66784.2	69753.6	72314.8	58771	62427.9	71110.7	76081.1	65469	67635.5	65114	58567.5	60202	66519	42635.4	45445.3	46417	49638.6	46219	47783.4	45215.1	49964.3	42554.1	45214.2	45390.3	42537.1	48427	50295.1	46907.7	52902.8
Gch1	707.592	951.973	1033.64	1656.07	713.337	1095.91	974.117	1280.74	423.469	626.174	568.076	1008.66	1008.83	924.523	1095.39	724.829	811.373	1242.72	738.218	1263.16	NA	NA	NA	977.652	929.181	1173.11	NA	946.745	1174.09	NA
Slc25a11	27936	29282.8	31820.8	28488.1	34249.2	29408.3	31449	34368.3	35836.6	29946.2	37282.2	38444.5	30033	30529.9	33678.9	34750.1	44392.3	41136.6	44075.1	41781.2	38124.7	32055.8	31826	30485	31481.3	30813.4	46040.8	44337.6	39310.4	39670.4
Mprip	17354.7	16975.7	17619.4	18746.5	18484.1	18835.7	17069.9	18249.9	16714.9	18879.7	15928.1	16930.7	15346.2	15062.9	17412.1	19530.3	17040.2	16623.1	14708.1	16917.5	17195.2	17007.9	17966.7	16546.5	16118.4	17386.7	16018.2	16069.6	17690.6	17645.2
Arhgap31	10167.3	11434.8	10662	10794.4	11906.8	12399.1	11094.3	9984.77	10349.6	11054.9	9916.48	10202.9	12049.2	11567.8	9236.19	9659.23	10485.4	9947.32	8325.56	8692.1	10395.7	9895.21	9236.56	10170.2	9559.36	9823.72	9658.67	10043	9399.81	9230.23
Tmf1	6524.35	6875.77	7022.11	8736.28	7625.98	7693.57	5871.43	7684.46	7589.53	7826.89	6470.96	6864.05	6113.52	6527.39	4186.22	5895.64	5592.82	3816.67	3210.6	4638.1	3995.7	4460.55	3848.89	5154.48	4387.38	5151.84	2154.06	2776.41	3836.42	4253.38
Cdc73	1885.99	1793.88	1925.62	1811.08	1657.9	1749.73	1970.01	1929.67	2149.19	1586.96	1677.2	1564.22	1382.99	2015.76	1529.17	1607.18	1064.65	1252.26	1216.44	1558.26	1436.31	1560.41	1144.39	1245.86	1172.3	1177.06	1198.5	1016.38	1446.89	1626.82
Atrx	1416.04	2132.14	1706.36	1965.49	1915.25	2228.16	1713.62	2292.72	2004.02	2118	1933.63	2000.51	2234.82	1914.33	1477.71	1376.44	1140.5	1075.98	1128.79	1292.36	1577.38	1248.98	905.244	1665.94	1148.65	1654.19	1211.99	1259.68	1711.55	1010.36
Gpam	1204.49	1079.31	1825.23	1938.2	1459.15	1547.75	1489.17	1522.47	1514	1669.63	1723.71	1570.53	1504.35	1440.13	864.817	579	1049.35	778.21	595.037	800.391	681.939	237.492	716.591	711.629	913.055	1439.42	1175.18	1784.59	1413.92	1936.31
Bbs4	716.976	546.089	404.024	687.79	393.542	655.781	369.818	592.475	659.17	NA	695.984	NA	NA	641.04	601.728	NA	734.328	474.791	NA	869.765	NA	NA	NA	NA	NA	616.726	NA	520.372	NA	364.684
Adk	53206.8	50304.4	47743.4	40936.8	46779.2	39197.5	38890.5	38474	51088.2	47988	49480.7	51487.6	56660.1	51782.2	56898.2	56446.8	52477.1	55296.5	50917.4	51961	52395.9	52480.6	60120.5	63420.9	61108.1	61902.6	63143.9	59111	59814.2	55702.7
Psmg1	2866.78	3065.93	2463.3	2662.52	3252.19	3244.3	2956.84	3463.95	3582.37	3201.82	2983.86	3381.98	2947.54	3327.23	1634.7	2725.44	2105.01	2885.32	2602.06	3843.94	2235.68	2661.82	3262.07	2446.73	3575.75	3213.08	2916.33	2079.68	3185.31	2520.31
Mccc2	11518.9	12754.4	10115.6	10441.1	9532.86	9756.45	11078	11701	9528.46	9660.12	11742.6	11089.5	10812	10105.2	16155.6	14237.1	14953.6	14691.3	17565.2	17566.1	13831.6	14113.7	11743.8	12972.5	10987	11504.7	16006.6	16023.7	16147.8	16076
Fhip1b	NA	307.103	398.4	411.462	451.234	359.313	551.839	347.142	NA	592.785	443.267	NA	455.07	334.513	NA	317.086	114.207	362.75	487.043	334.118	458.03	286.28	NA	369.032	NA	NA	NA	367.464	429.228	537.43
Tmod2	13331.8	14785	14623.6	14900.7	15627.8	16492.2	15444	15950.7	16817.6	15683	15391.4	14923.5	13324.6	13864.3	15438.1	17415.8	17164.3	18609.4	17043.9	15974.7	17946.4	18908.6	16102.1	18140.9	16321.1	16685.3	15114.8	15425	15362.8	15823.3
Prkar2a	12365.7	11037.6	11244.2	11924.2	10592.8	11960.6	12971	11331.7	12992.6	13678.7	14150.6	15049	11531.7	9976.15	13710.8	12696.9	10730.3	13442	12356.1	16338.6	12786.9	9918.26	12425.8	12733.8	13168.6	13465.6	14098.1	14997.6	12634.8	12945
Myo5a	13734.6	14184.2	14694.5	15584.5	14570.5	16002.1	14044.6	15539.9	15060.4	15773.8	15012	15679.8	13871.9	14679.2	19528.1	19748.8	17558	18202.5	16452.3	15791.1	17941.1	18594	18690.7	19087.2	19812.9	20959.7	17865	17384.2	17391.9	18191.8
Smc1a	14164.7	14367.2	14922.6	15039.6	15446.3	13797.9	15675.9	15863.9	14498.7	14838.5	13421.7	14258.1	13816.2	14116.9	11045.2	11347.8	10227.8	10188.6	10248.7	11861	10638.8	10786.2	10081.4	10594.7	9751.17	10789	9794.5	10340.2	11604.4	11569.4
Golga3	5813.51	6629.67	6105.62	7137.89	6748.63	7943.85	6333.74	7457.51	6225.45	7045.51	5265.3	5431.86	5620.07	6079.55	4431.83	5717.83	4986.6	4879.88	4905.08	5121.7	5131.42	5993.74	4295.53	5351.89	4716.31	4924.58	4795.71	5569.75	5339.68	5056.75
Dnajc7	6033.24	6263.82	6354.24	6610.65	6531.42	7103.36	6887.14	6711.06	6748.11	6173.85	6026.31	6890.61	6939.73	6783.75	6477.34	7179.95	7235.53	7466.27	6747.04	6895.13	6400.17	5712.94	7028.86	6663.24	6503.68	7454.87	7118.54	6329.44	6861.7	7109.1
Sbf2	9877.51	11811	12155.1	12562.2	13313.1	14006.3	13252.6	12834.7	13204.3	12371.1	12775.9	13061.9	13018.4	12941.2	13373.6	13343.7	13978.8	12941.6	11230.3	11240	12774.5	13598.6	12871.5	13297	14299	14577.6	12147.2	11962	12482.1	12508.9
Pycr3	9921.78	9817.95	9090.94	7937.34	7698.15	7115.2	9324.5	9699.46	8918.27	7638.98	9060.38	9700.36	6833.37	9811.96	10111.4	9086.08	10063.7	10871.8	10526.8	9676.08	11095.6	8058.4	8386.39	9607	10389.8	10260.8	11180.2	10219.4	10910.6	8862.58
Ccdc92	5095.25	5347.24	5455.82	5470.05	4731.8	4749.49	4488.61	4609.53	5005.76	5241.24	4365.19	4470.08	4321.03	4564.6	4470.47	4495.35	4362.07	4294.59	3961.2	3868.92	4598.26	4309.97	4460.11	4886.47	5979.19	4902.98	4135.82	4479.4	3970.95	3989.61
Taf9b	NA	1027.23	861.203	683.596	NA	766.644	NA	568.451	NA	586.555	274.167	919.408	NA	NA	NA	NA	NA	NA	NA	NA	NA	NA	NA	NA	NA	NA	NA	715.602	NA	656.222
Pdia4	44536.3	42952.5	43688.1	40464.2	39378.7	39706.5	41986.3	43898.5	41746.4	41252.8	38317.2	36103.3	37080	40562.9	25954.7	25641.8	27174.2	25650.5	25006.7	24830.2	26637.6	27605.9	25239.7	27118.6	24922.7	26749	26312.3	25100	28531.1	27947.7
Rbm15	1848.72	1765.91	2000.42	1964.86	1889.67	2158.43	1727.15	2376.6	1316.63	1735.65	1782.45	1365.73	2365.31	1817.8	751.485	1436.24	1432.21	1078.6	819.127	1190.31	816.543	1228.95	720.25	1009.09	1356.93	1280.68	673.072	1249.18	1399.63	1785.28
Arhgef17	3882.37	4679.13	5129.21	5380.84	4542.73	4876.21	4961.72	4930.8	4622.43	4795.77	4049	4296.58	3887.51	4445.58	3015.57	3334.44	2783.29	2757.84	2507.85	3120.02	2969.02	2636.28	2717.23	3073.72	2417.08	2966.58	2816.5	2831.61	2621.48	2467.69
Zc3hc1	1137.02	1354.37	812.437	1345.33	1255.32	1412.08	718.213	1017.31	1295.52	1025.65	1004.52	1045.48	1426.62	1130.89	792.22	694.179	1038.9	906.902	1131.52	1320.77	1793.64	1119.03	563.806	722.895	1222.52	1241.14	558.942	1010.42	866.633	1036.98
Gfod2	2051	1805.74	1659.15	1284.01	2312.08	2627.9	3092.92	2502.78	2923.95	2054.99	1954.37	2200.17	2239.91	2251.51	1817.75	2187.22	1537.97	2760.31	2763.49	1518.03	2109.91	3102.94	2549.16	2230.97	2394.14	2600.04	1782.49	2048.96	2220.89	1372.72
Dync1h1	82000.9	80511.8	88665.2	83317.9	85154.8	83769.4	88917.3	86093.6	89408.4	86966.4	85544.3	86050.9	77560.2	77326.1	81511.9	79368.5	81126.9	80612.5	75980	72357.6	79965.4	79276.6	79564.4	81968.8	83434.8	80981.7	72380.4	71131	75223.6	74717.1
Fam177a1	26656.8	26316.2	30732	26077.6	28383.4	28320	29207.6	28416.9	29575.5	30014	27953.7	27657.1	33992.3	29906.5	29798.7	27138.6	28100.8	29138.3	23529.7	21886.2	24550	22533.2	28064.6	27341.4	27132.5	29980.1	25439	21634.9	24544.9	19840
Ube2v1	8800.38	7806.34	8640.9	9501.04	7324.13	9465.67	8889.14	10480.7	9902.8	10599.9	9731.38	6894.93	11444.5	9652.45	10875.2	13117.3	11688.8	12248.4	12867.3	14397.4	10287.4	10090.6	7372.34	12611.8	12063.6	11563.2	13484.5	17556.9	12995.9	15579.3
Synpo2l	NA	NA	NA	1299.86	1898.83	2091.32	NA	NA	3306.12	3506.5	4043.79	3889.09	NA	NA	1843.01	2023.18	3506.4	4261.33	5574.48	5776.49	1542.18	1468.04	NA	NA	1454.24	970.341	5298.7	4815.26	3568.37	3135.26
Tgfbi	124660	126284	122218	113214	108280	110545	113985	119918	108026	100502	104071	116599	105528	106725	163228	153806	156689	152671	160867	146429	148683	147574	144941	153657	144774	133407	141841	130454	126001	138674
Atat1	2080.44	1596.53	1904.62	1463.72	1566.69	1482.97	1704.54	2034.68	1913.96	1651.47	1301.26	1483.54	2142.76	1942.82	468.604	1132.44	852.867	730.127	1478.38	933.195	1080.84	1595.64	1073.44	1347.2	1174.55	1142.11	1936.73	1346.09	1191.37	1169.4
Pcp4	4543.1	6316.88	7816.01	8118.4	5905.35	5197.86	3870.62	3691.84	4538.32	5984.72	3845.62	2482.77	5561.32	4416.14	6570.02	6951.94	6684.76	9123.93	6411.45	4638.34	4425.21	5139	10799	10918.9	12832.7	13945.1	10579.2	11692.5	13655.9	14241.1
Calhm2	1130.12	1033.56	2048.51	NA	674.248	1344.77	1400.24	1613.42	923.354	1592.88	1250.89	910.297	467.071	1410.95	1398.69	1223.17	1787.82	1775.53	931.657	1439.84	NA	1928.32	1238.99	1808.85	866.622	1450.18	739.147	1145.45	991.073	2184.97
Uba1	148108	137743	137432	132372	128421	135756	142278	136831	137827	140474	138077	141975	138213	142436	155233	157491	158139	161154	152617	146491	150273	157347	161317	162779	157620	152301	172537	164723	152200	160669
Arhgef2	3362.64	3080.75	3241.57	2932.97	3464.81	3530.2	3287.04	3251.76	3244.31	3188.9	3162.25	3349.23	2871.67	3471.82	3792.03	3245.71	3292.9	2879.71	3321.89	2616.48	2536.54	2521.19	2952.39	2380.71	2796.7	2968.69	2927.11	2347.5	3387.55	2975.39
Hsd17b4	50094.4	45859.6	51429.1	48585.5	48315.6	47188.7	49611	52555.5	49704.3	44179.3	43909.3	43022.9	45523.6	46012.8	34391.5	29111.2	33406.4	28558.3	34176.5	30787.2	28957.7	26070.4	31037.6	32872.9	30539.7	31862.3	34078.4	29162.8	30529.5	30854.8
Edc3	2657.11	2803.4	1910.52	3555.03	1622.18	3646.88	3079.15	2390.66	2732.88	3838.5	2887.93	2215.91	3046.92	3580.98	1630.93	2839.54	2670.27	2905.73	2168.81	1767.18	2322.51	2951.32	2310.42	2788.27	1899.23	2615	2271.97	2438.48	1768.74	1998.99
Adh5	65007.2	68459.1	59603.8	57013.6	69222.7	67717.9	59556.3	61988.6	66860.7	65790.2	82780.8	81419.7	68236.2	74791.4	82266.4	84797.8	83617.4	83657.3	84771.5	77972.6	72554	70253.4	78553.4	85624.2	85433.8	76721.1	87876.4	95619.7	82471.5	89372.9
Etfa	99999.1	103135	92924.7	89914.6	90636	93971.8	97636.6	109120	100645	101148	128950	119721	98311.4	106270	113669	108138	125509	131017	145902	133567	111867	115406	97050.7	107744	103586	98150.4	134775	122866	113752	123592
Hsdl1	7479.23	9542.17	7797.92	11874.7	10534.4	11128.8	11020.4	8984.79	9231.71	9915.71	10270.9	11385.9	12318.8	10629.2	9812.97	10615.7	8719.54	10648.1	9206.98	10106.6	10487	11240.3	9242.19	10910.8	9992.2	9749.88	8606.11	10148.8	9525.32	10496.2
Hspd1	100124	88001.4	99982.3	81901.8	80660.3	79971.3	90744.7	82824.7	93130.9	82986.1	93576.9	88097.1	81837.9	77263.2	99266	92198.3	100240	105503	113317	104711	90911.4	92963.8	95791.2	84102.4	96192	89373.4	103517	106346	98594.4	101060
Tbcc	9409.42	9820.76	7897.13	9930.34	9507.96	9527.25	8630.57	8690.69	9705.09	9953.86	9545.94	9685.98	7837.5	9358.77	9798.08	8782.62	9293.03	7501.62	7845.17	8956.98	10238.3	9807.74	11355.1	10004	9310.27	10503.7	7688.94	7805.3	9523.69	9279.75
Mthfd1l	13218.1	13269.2	13607.9	13940.3	14806.2	15083.2	14475.1	14903.3	13745.4	13285.8	13026.9	12856.1	13973.6	14609.8	15146.7	13871.1	14076.1	14045.4	13430.4	12694.7	15768.4	15065.2	13151.9	13597.3	12834.8	12339.5	13370.9	12516.2	12037.1	12917
Kpnb1	80135.5	81823.9	90544.4	81058.6	81117.5	75755	89735.7	90021.7	90517.1	76972	86634.1	84855.6	72050.7	80036	83215.1	73362.4	72683.1	73771	77333.1	64130.8	80691.5	79008.9	74051.5	78557.5	75056.4	74238	73118.5	66139.5	72378	72114.4
Sympk	768.517	1164.51	811.1	985.909	1055.72	936.542	1015	1250.55	949.422	917.104	967.4	930.597	1291.88	943.735	924.357	577.712	1190.54	806.584	548.232	667.478	764.628	735.478	693.901	693.493	830.976	846.503	994.544	1068.84	825.999	855.456
Bckdhb	2045.61	2115.71	2176.89	2117.79	1770.34	2329.37	2658.79	2247.79	2423.89	2162.78	2595.58	3298.08	2071.62	2246.21	2401.83	2640.48	2028.11	3063.06	2476.41	2091.08	1352.91	1104.77	1507.31	1447.8	1931.54	1671.31	3280.9	2419.15	2943.15	2878.17
Pex5l	8641.97	8498.37	8907.67	8969.8	8517.34	9045.98	7241.82	7110.2	7789.84	8454.24	8468.04	8483.32	7631.31	8560.43	9382.08	10757.1	8127.82	8667.62	9431.76	9515.04	9698.62	9442.93	10105.9	9524.66	10136.7	10395.1	8740.03	8553.5	9370.12	9358.58
Psmd1	16555.1	16451	17522.9	16818.1	17326	15940.1	16953.4	15606.7	17664.4	15539.1	15949.4	15042.7	15346.8	16056.2	12158.1	13116.1	12423.9	11954.4	12462.6	13713.3	11817.2	11976.3	10381	10159.2	10873	12582.4	12514.7	13774.2	12431.6	12106.7
Hmcn2	1702.05	1631.87	1562.29	1143.53	1726.9	1498.53	1713.49	2033.66	1481.33	1870.53	1557.42	1904.19	1980.3	1775.44	2113.69	2650.05	2324.43	3213.01	2349.57	2787.43	3271.6	2908.02	1772.39	2120.93	2094.01	2458.63	1815.73	2392.14	1906.67	2455
Ewsr1	30561.8	35588.4	28037.8	41105.8	29846.2	32031.1	29241.7	39264.2	34059.5	37752.5	28855.3	34638	27906.1	27697.3	21364.4	24443.8	19548	21444.2	19980.8	23859.1	24148.9	19751.7	25077.2	23264.3	22369.6	19518.5	19748.8	21105.3	22677.7	27625.4
Naa35	3082.55	3424.51	3384.52	3594.82	3506.26	3655.74	3418.41	3438	3301.19	3404.49	3216.43	2730.67	2615.51	3129.48	2799.86	3018.2	2352.42	2764.73	2900.61	2413.87	2631.47	2512.58	2430.96	2555.71	2600.28	3283.97	2219.38	3323.99	2434.99	2510
C3	146367	148463	146403	132874	130122	132080	156474	147355	126604	120839	183981	181996	155532	158654	102508	101928	70716.9	72015.3	77530.6	77469.5	76104.3	76494.6	144203	144751	167354	170317	140652	130242	169273	164686
Spta1	13476.3	14069.7	35228	35333.8	5444.9	5662.01	21347.4	21690.3	5911.63	6457.17	8570.17	8957.12	9460.5	9898.57	34759.8	33914.9	2537.24	2672.33	5505.09	6144.03	3503.38	3610.44	8184.46	8575.62	22339.4	23355.2	18605.1	19222.6	11881	11934.1
Tlcd4	801.405	717.562	1317.25	1067.47	852.961	825.968	593.62	712.053	829.143	1197.15	477.151	625.534	1162.88	997.089	833.91	790.9	751.156	NA	NA	NA	530.988	NA	589.824	504.574	791.014	416.602	308.332	608.742	NA	1077.29
Qtrt1	2647.11	2513.1	1920.82	2883.54	3161.47	1661.7	3541.04	3214.14	2774.59	3216.87	3115.29	1862.35	2933.68	2547.03	2286.87	2073.5	2672.25	2132.65	2682.68	2934.86	3037.02	2502.1	2125.63	1832.98	3215.83	2835.37	2152.35	2406.66	2857.65	2770.13
Hhatl	2058.52	2542.46	2557.94	2049.08	5554.38	4621.14	2482.35	1541.37	8122.97	6590.21	12856.2	12019.2	NA	2152.43	8556.55	7547.24	9981.61	8294.74	20701	19127.1	3959.75	2607.06	1542.45	1599.03	6528.04	5580.63	26116.4	19852	12806.3	13961.8
Wdr7	7175.43	8775.48	7288.26	7499.19	8889.11	8800.38	8207.84	7716.26	7969.41	8724.79	7769.8	8322.18	9318.26	8663.76	7666.86	9479.34	8612.38	9009.16	7261.91	8562.92	8018.17	8350.45	8475.45	8763.43	7821.4	8601.24	7290.61	7400.79	7553.41	7324.6
Itih1	23141.2	23571.7	26978.5	28220.7	20021.9	19246	26787.7	25863.9	18805.8	17408.1	22460.4	21720	20812.4	21357.3	28094.9	25882.3	14862.8	17024	18648.3	20587.2	17439.2	18817.6	21314.6	19153.8	26075.6	28705	25064.9	24901	27930	28234.5
Itga7	34643.4	38706.6	37285.1	39657.2	35544.2	37575.8	36901.8	35910.7	35294.5	37724.9	39445.9	38488.9	40753.5	38766	48585.7	46779.9	46735.2	49788.1	46162.5	46102.7	41231.9	44143.2	46248.8	45372.5	40635.4	41983.8	42344.7	43657.7	45344.6	44378.4
Adh1	24107.5	23080.7	11633.2	11760.8	14563.7	15187.4	16386.1	12903.3	13772.7	17470.8	25392.3	25297.9	16141	25977.4	30039.9	29868.8	20599.8	21852.5	29759.3	32132.2	24101.7	28506.8	23650.9	25574.8	21211	25809.7	25649.2	28497	30681.8	31250.2
Apip	12723.1	12604.5	8025.98	14294.1	13017.6	12882.3	13152.2	11137.4	11561.9	12199.4	12788.2	12978.5	13061.8	11123.2	9085.86	11586.5	8328.25	11625.9	8679.99	14151.6	9908.21	11601.2	9822.98	8903.13	9215.5	9996.62	12337.8	12578.6	10302.4	12759.6
Prpf8	5707.06	5298.03	5521.59	5722.57	5676.49	5768.59	5961.88	5828.66	5875.79	5803.99	5577.8	5342.79	6050.4	5754	3747.91	3816.92	3475.97	3404.58	3416.92	3877.79	3794.6	3647.86	4105.71	3848.64	3541.45	3932.42	3606.23	3366.47	3740.47	3382.91
Enah	12090	11142.3	9557.86	9626.34	12766.1	9116.43	6679.86	9447.33	11368	9707.26	9928.81	10137.8	14745.1	9708.28	13794.9	14154.3	12698.1	10565	10721.4	10132	13160.7	13528.1	12344.2	11738.8	13362.9	12567.4	10312.6	11591.6	11574.7	12380.8
Atp1a1;Atp1a2;Atp1a3	168465	170154	201146	163286	157179	160461	176018	168740	181678	165985	156014	187333	160521	174543	237806	192668	226865	215062	213502	198251	219108	227679	220281	227129	220761	226367	215697	196711	180834	200896
Snx5	30147.1	28255.9	24752	24694.2	25773.1	25455.8	25055.3	24502.7	24931.9	24235.9	28067.1	27735.8	24280.5	28284.7	22538.9	22775.4	22235.1	21160.3	26876.4	24880.2	27081.7	23459.7	22436.8	21308.5	22539.6	27166.4	23242.7	21555.3	25966.5	22542.3
Eno1;Eno2;Eno3	620075	573793	670840	477223	729834	735539	588593	586346	711781	654829	1002200	848960	970034	763914	1253850	1179010	863662	895432	1528180	1339330	669425	624718	715110	664974	948754	903670	1914010	1645380	979841	1079550
Eno2;Eno3	10426.3	11438.1	8891.92	7989.11	12014	12241.9	7337.15	7991.48	17232.6	19975.2	27480.2	29953	13228.9	13093.4	44483.8	37758.4	20117.2	27458.1	63610.2	59142.5	20252.2	11245.4	17596.8	19016.8	31863.7	29006.2	72964.2	49230.9	44158.6	40224.8
Eno1	526304	493325	529104	480787	437251	447503	431396	471031	484216	483062	485709	532379	446052	419980	509495	510281	463983	462430	514967	502903	452052	425134	519685	560474	552696	491542	522385	546044	517826	576486
Tln2	22303	22005.1	22514.5	22699.1	22971.7	21892.8	22821.7	23010.8	23350.6	24269.8	22435.2	23345.1	21575	22632.7	21679.4	21672.8	21170	21181.3	19326.3	19323.4	21507.4	20602.6	21513	21552.1	19342.2	19479.5	20334.7	20841.3	20183.1	20386.5
Psen1	191.099	240.87	356.383	554.134	352.811	454.143	287.244	339.719	571.545	436.034	169.336	137.182	186.434	177.082	NA	129.42	NA	254.687	62.1429	410.989	176.913	318.051	25.0879	433.04	340.144	NA	298.528	219.387	NA	268.836
Arhgef40	4119	3992.01	3971.12	4459.57	3895.66	4940.69	4316.2	4222.38	4259.51	4746.9	3880.06	3859.98	4154.86	4158.34	2193.77	3025.54	2932.71	3160.96	3058.79	2821.9	2853.82	3454.79	3152.13	3301.98	2981.74	2966.55	2679.91	3156.26	2645.07	3163.28
Cbr3	11572.3	13528.2	10689.9	9559.64	10841.8	11684.1	11911.1	9774.86	12277.8	10384.4	13408.1	12255	11647.1	13881.7	19078.9	21195	17671.4	18968.7	20807.3	19011.1	20563.7	17458.8	19088.3	20320.5	20772.6	18483.3	21702.5	21252	19836.8	23385.4
Heatr6	1701.75	1431.28	1293.02	1409.94	1118.26	1730.78	1210.53	1647.68	1226.69	1328.96	1458.19	1250.42	1279.04	1648.21	1100.69	1184.15	903.942	1352.91	NA	1547.65	1527.65	1586.53	626.508	1136.49	1331.97	1502.7	1378.16	1246.77	1420.96	651.732
Mmut	15041.3	14181.4	14954.8	13323.8	13824.6	12783.8	11869.4	11891.4	12521.7	13098.9	13503.7	14055.5	11732.4	11965.2	11578.4	12734.5	11049.1	9834.74	14231.8	12892.5	12226.8	11663.7	11186.9	12416.2	11935.1	12540.3	13143.8	13033.7	14009.1	11929.7
Hbb-b1	541872	594054	763456	594617	195138	225525	697872	712478	248999	257777	478868	554192	428987	489523	954594	966236	113311	154430	213742	208672	185824	233806	379140	383386	744653	795994	696512	691883	300712	385810
Syf2	1120.21	1160.85	1613.9	1156.54	1536.98	1599.54	1357.32	1431.24	1278.35	1160.51	882.66	1481.51	1146.73	1229.32	298.859	646.189	720.152	1145.53	737.251	952.441	1202.51	998.229	1054.22	NA	929.48	1057.16	1070.99	689.151	1230.49	1012.26
Myh14	37294.8	35456.3	40200.5	40530.9	38292.9	39097.4	36774	36007.4	37136.3	36731.6	34604.2	35069.3	31602	32069.2	32465.5	30891.4	30632.9	30292	30135.8	28264.6	32766.1	33116	33592.7	33435.1	34687	34784.8	29019.4	29941.7	31937.8	31053.6
Zc3h13	NA	NA	NA	269.921	371.037	NA	317.211	NA	584.756	576.28	NA	NA	NA	219.217	NA	NA	NA	NA	NA	NA	NA	NA	NA	NA	NA	NA	NA	NA	NA	NA
Mea1	1080.25	1741.23	1303.07	1888.43	2453.13	2755.29	1515.74	1883.39	1898.62	2560.69	1760.57	2163.35	2453.52	2061.01	1653.89	2061.46	1816.1	1859.25	2204.03	1969.28	1521.87	1891.9	2163.48	2215.79	2735.79	1654.07	2890.78	2678.56	1386.2	1726.43
Add1	113798	106272	120310	107083	109172	108028	113418	107135	114913	117326	108869	115657	105969	108425	132955	128090	127923	134511	119520	123442	140191	131964	128891	126247	138129	126284	122486	128216	125271	125143
Lig3	2301.73	2396.33	1961.42	2512.36	2111.54	2105.81	2803.68	2392.13	2996.46	2584.08	2580.99	2107.53	2560.06	2825.25	1516.81	1465.35	1376.04	1330.24	1496.48	1426.04	1801.24	1669.45	1588.89	1198.7	1270.86	1624.42	1650.36	969.545	1411.43	1974.62
Wdr13	5365.8	4655.57	4697.22	5135.79	4409.56	5244.35	4670.12	5502.63	4577.32	4751.09	4296.56	4607.59	5862.43	5687.77	5586.34	5580.59	4918.33	5106.12	4724.96	5509.22	5967.15	5293.65	5459.6	6080.84	4441.25	4636.66	4638.03	5114.54	4929.7	4645.34
Xpnpep2	16922.9	18346	16676.3	14772.4	16416.8	18099.1	17591.1	15767.5	17594.7	17440.5	15833.5	14849.6	13917.7	16155.7	22583.7	19493.4	20125.7	22475.6	17778.3	19154.4	19733.1	22084.4	18301.6	23180.2	18607.7	20097.7	19605.3	19429.2	21187.6	20566.5
Umps	10290.2	12005.5	11141.5	10516.6	11469.4	11266.7	8802.83	11351.2	11707.1	11275.7	10454.3	11734.8	12268.1	12204.8	8275.83	8100.89	8141.58	7311.04	8936.09	8447.08	8489.38	9315.04	7955.44	9506.5	9528.63	8430.9	8991.38	9766.59	9938.25	9211.97
Nav1	1788.57	2044.66	1972.02	2301.84	2613.36	2406.63	2194.16	2137.84	1862.41	2511.41	2048.57	1972.22	2785.28	1694.49	1470.31	1562.8	1800.43	1643.08	1433.9	1316.8	1302.5	1846.12	1027.53	1455.75	1530.35	1430.13	1509.84	1289.49	1380.33	1137.07
Acadm	77380.1	73232.4	66447.4	61230.2	65265.4	63450.9	72384	64461.1	77064.6	74694.4	85021.7	82435.1	56099.2	65592.3	77878.7	76755.3	98837.2	98585.8	103211	101212	79535	75441.2	69977.5	71467.4	71598.1	67917.3	88088.4	86887.6	89248.3	90596.4
Opa3	9046.71	9705.64	10189.9	11621.9	12328.3	11318.9	11466	12370.3	11546	12459.4	10615.6	9862.58	10414.3	10311.6	11553.6	12706.7	14576.1	14295.7	12309.4	12614.4	11996.6	12266	10111.6	12157.1	10302.7	11053.1	9705.66	11505	12105.1	13597.8
Acox3	5206.38	4811.82	5849.12	5281.42	5603.19	5490.69	5151.1	5649.57	5249.82	5099.49	5085.63	6247.59	5789.42	5855.15	4028.76	3939.65	3549.49	3968.66	3197.75	4482.76	3790.76	3846.9	3755.87	3723.62	3513.76	4307.45	3242.45	3379.55	3615.9	3747.05
Wdr47	2809.71	2910.75	2570.2	2927.87	2455.45	2607.3	2794.07	2798.11	2846.12	2568.84	2986.66	2473.45	3067.58	2750.92	2728.85	2339.38	2575.25	2959.56	2098.47	2523.61	2622.52	2581.93	2154.27	2755.57	2589.92	3075.43	2319.56	2353.93	2298.59	2336.95
Aldh5a1	4975.72	5126.09	4409.45	5635.04	4711.41	4936.98	5703.15	4967.01	4815.05	5240.83	5348.31	5990.17	5555.93	4900.64	7946.71	7078.33	6812.87	7877.71	8997.23	7031.52	7454.93	6643.34	6139.53	5692.34	6238.61	6152.05	6240.59	7107.01	7044.07	6978.28
Ppl	2800.16	2291.01	1607.95	1552.59	1541.77	1409.45	1623.32	1653.46	1669.85	1315.7	1509.28	1628.23	1769.23	1574.74	5042.91	5683.12	6499.91	6219.03	6083.37	5889.5	6366.64	6023.33	3005.09	3220.61	2796.96	3468.22	3094.65	3470.51	4356.59	3842.49
Ykt6	34134.9	38075	37395.6	32404.1	32005.9	32524.2	29849.4	32759.6	32388.5	31200.6	33233	33478.3	31268.1	29300.1	33404.8	27140	28686.6	25389.7	31320.4	25139.9	29513.1	28129.2	32503.8	30635.5	34054	34349.4	31296.5	28918.2	33901.2	28964.1
Lrrk2	1937.49	2111.7	1998.46	2180.61	2104.8	2075.13	1928.44	2133.96	2008.84	2201.43	1852.91	1911.73	2051.12	2032.02	1539.52	2056.63	1716.3	1884.72	1595.38	1439.38	1445.66	1588.87	1378.38	1399.87	1923.57	2314.56	1402.93	1382.67	1835.18	1744.36
Bloc1s4	1654.75	1075	2668.29	1192.16	1810.02	1545.01	2303.05	1894.77	1505.84	892.546	781.697	2118.95	2383.03	1698.35	1925.17	1087.41	1357.87	2075.48	1405.88	1636.1	776.031	1705.34	1798.55	1657.09	1642.97	1913.06	1267.39	1405.09	2216.29	1382.24
Slc25a5	179206	163804	176097	142330	161101	144793	176453	165577	167325	148166	190547	167521	150633	167809	162972	153472	155341	139632	143808	137942	157673	144326	151362	134214	145413	140757	147533	132228	158746	146592
Slc25a4	165198	163302	181520	153320	191401	176585	191643	171516	237997	215568	338711	299970	160942	165309	276783	280956	315842	280452	418157	365793	182443	165773	183583	166207	225075	193440	359522	316003	277482	287074
Myo15a	NA	3181.68	3626.22	3828.95	NA	14971.6	5240.17	3320.66	12647.1	11887.4	8645.77	15455.1	NA	NA	11386.6	14086.1	NA	12390.7	NA	NA	2853.01	5935.61	1745.04	2655.96	7677.03	10309.3	34871.2	24472.3	16602	NA
Stxbp3	13434.1	14787.8	13962.1	14744.1	13980.6	14560.4	15177	14893.5	14133.6	15114.4	15691.4	15035.6	13249.3	15028	16807	17965.3	16868.3	16349.5	15248.6	17908.6	16035.9	17917.9	17718	17154.3	15508	17163.8	16482.1	16476.8	16594	17192.9
Ndufv1	39657.8	37358.5	37901.4	39948.4	39883.2	39291.4	37618.2	38933.6	44550.2	44861.7	49255.8	55459.4	32722.1	31306.6	42977.6	44734.1	49266.6	48591.1	60107.3	59197.3	39064.4	37335.8	36383.8	35781.5	39449.2	39158.3	53617.9	57836	48891.4	48415.7
Rabggta	60458.7	62383.1	57293.1	58081.2	67364.3	65042.9	58394.8	58096.3	61870	67974.2	68488.1	67156	60898.4	71726.2	78090.5	78453.2	76758.5	77472.4	75988.6	71645.2	74987.2	78717.7	73508.9	80050	72909.8	78218.6	80029.2	76149.8	76518.4	69375.4
Chd4	7230.56	6790.03	6360.75	7080.88	5933.6	6612.46	7893.72	7208.83	7459.7	7429.61	6728.43	6354.04	5761.25	6945.94	4823.11	5452.83	5100.88	4526.48	5098.65	4572.88	5273.69	5097.17	4603.37	4460.29	4237.07	5238.31	4238.07	4230.68	5289.22	5383.01
Anxa1	103043	103704	92967.4	88730.1	83215.8	81776.1	100237	100117	96778.5	93760.3	111856	119369	94159.9	94087.5	121422	117452	125519	131808	131936	120215	132149	131927	123229	127405	141282	135054	125855	127744	124324	131865
Myh1	16406.4	20149.2	10841	11549.7	42206.6	36229.2	32088.8	29785.8	79366.4	73436.3	317881	279320	5448.02	4109.68	62769.5	58907.2	55752.1	52086	291375	267218	29795.3	24145.2	1955.58	1149.73	54276.6	53982	112840	112995	75106.1	67589.3
Myh4	14197.1	33678.9	40884.6	34698.8	741583	758191	146731	148944	1240110	1239330	1478620	1535470	34744.9	34373.2	1067130	1111030	805380	824399	2957550	2889710	113029	111042	4153.72	8215.72	621570	652674	3426920	3319270	2158190	2316760
Cotl1	105232	96085.6	96394	86300.3	93007.9	86383.6	87454.4	82031.6	100147	88717.8	96715.1	88601.7	70441.1	85485.4	82589.1	71831.7	79991.7	69956.8	77198.8	75595.2	89867.7	80197.9	83862.6	96516.2	97414.1	88788.1	79904.7	74395.6	89777.3	84145.6
Ccar2	9589.6	9267.94	8599.35	9343.93	8701.28	9290.75	10214.1	10096.6	9784.15	10518.4	9310.6	10460.9	9123.21	9778.1	6122.26	6588.32	6728.41	5515.25	6380.83	6253.16	5948.22	6451.07	5145.59	6399.84	6109.34	6453.56	5859.98	6323.3	6845.4	6151.86
Fto	1460.12	1504.45	1350.84	1262.73	1791.25	1147.06	1152.16	1406.22	1478.64	1418.81	1572.37	1443.81	1673.05	1730.38	558.404	1394.57	967.43	1109.08	1455.35	1630.56	1254.59	1106.54	976.453	994.271	926.714	1039.58	1103.85	1221.38	998.319	1843.5
Usp11;Usp15;Usp4	2756.93	4130.43	4344.32	3175.48	2598.9	2158.28	3184.02	4074.6	2984.12	4041.54	2054.91	2856.97	5418.64	2718.45	2797.07	3123.08	1911.38	1920.96	4000.14	2693.18	2131.12	1300.5	4138.78	3110.51	2760.26	2171.58	3070.96	3550.8	3377.84	3920.19
Atp9b	2299.65	2669.96	2469.51	2862.63	2656.4	3040.71	1644.32	3309.5	2223.86	2215.82	1471.44	2391.06	3174.13	2513.87	1312.02	1888.91	1516.06	1971.83	1912.31	1834.74	2153.38	2279.46	2301.32	1728.71	2361.93	1624.69	2070.49	2211.67	1035.43	1636.29
Ube4b	5283.73	4994.81	4804.14	5521.4	5802.17	5660	4675.47	4827.17	5757.55	5621	5250.17	4928.5	4977.28	5533.47	4905.82	4793.9	4318.66	4576.74	4223.22	4903.3	5477.25	5154.48	5268.64	5119.83	4988.62	6072.93	4811.35	5553.39	4274.36	4877.04
Gnb1	109864	95850.4	120314	94504.1	89298.3	97064.2	113701	115111	108031	106155	140709	148236	144236	115483	200928	178522	146540	157910	144950	147519	136656	136549	166585	157620	177097	149686	166236	179832	131049	134635
Arhgef12	9210.05	9414.81	8696.69	10009.4	9555.49	10525.8	8825.31	9758.05	9234.46	9703.19	7910.84	9301.94	8513.31	8728.46	6646.05	8940.58	6606.57	7805.62	6329.56	7536.8	7092.15	8330.4	6797.97	7754.72	7527.5	7801.3	6651.93	7619.39	6781.6	7121
Fscn1	248929	239902	242431	239554	221536	218544	204076	207202	230953	217513	216710	238573	224920	228266	211323	206617	183505	172850	165469	176417	191466	169456	224397	221634	217927	207709	196222	192770	187435	201632
Rundc3a	2042.81	2656.03	2718.75	2676.93	3556.17	3123.97	2956.09	2570.54	3325.39	3004.68	3552.38	4198.41	3232.03	1956.2	1651.28	3083.48	2912.1	3353.31	1961.2	2826.03	2902.24	3013.22	2542.15	3405.78	4403.92	3481.96	3325.87	2906.78	1835.9	2213.8
Rpl4	72701.6	70565	77194.3	73682.8	66272.9	66512.6	82546.1	85328.6	74472.9	73309.7	76204.1	79150.5	61913.7	72457.5	52527.5	50035.4	47185.3	46494.5	45203	47896.4	42005.3	42594	44891.5	44371.1	44830.8	45593.2	49796.4	50679.4	49784.2	49274.2
Itgb4	167948	156450	165621	156421	145671	145080	152904	151824	151553	152694	168475	172194	158107	157765	236834	235265	228214	228338	211382	206998	200773	205372	217577	230101	206853	203903	202608	197208	197241	209337
Ivd	39744	36880.7	36853.7	32278.7	33626.7	32806.8	34757.9	35297.4	35980.7	34249.1	42514.7	43447.9	32496.2	37517.1	39386.9	38323.8	46660.4	44052.9	47225.2	42581.6	42747.6	40566.2	34324.6	38889.2	37953.2	37860.9	48400.5	49403.6	52560.2	51433.4
Prkaa2	1275.7	2067.32	1821.45	1704.07	2238.99	2798.2	1076.27	2313.27	3659.31	2844.82	3401.88	3161.29	1977.9	1528.05	3109.59	3670.6	3319.53	4273.01	5871.62	5991.19	2682.43	1862.43	2546.8	2528.09	2659.87	3450.83	6539.55	6209.03	4708.39	5095.95
Esyt2	11808.6	11371.5	11695.3	10403.7	10099.8	10661.1	11402.2	11726	10666.4	9973.53	10136.4	10321	11132.4	11309.2	11809.1	12703.1	11734.2	12567.5	11550	10781.9	12601.2	13040.7	10573.3	11467.7	10805.2	12121.4	12064.8	11593.9	11249.7	11909.9
Ttc38	11631	11778.1	10517.8	10719.1	9872.11	10534.2	9364.05	10192.8	11363.2	11768.3	11136.9	10647.3	12245.6	11999.9	10099.8	11402.2	10514.4	8571.16	10106	9516.88	9657.3	10046.7	10712.5	11198	10172.4	10410.5	10480.9	11343.8	10978.9	11226
Gnl1	6824.15	7764.27	7065.25	7883.54	7733.6	8463.21	7507.19	7477.49	7843.65	7815.1	7052.19	6833.61	6805.55	7429.09	8357.28	8395.45	7133.66	8166.43	7403.79	7325.19	8054.42	8195.56	7859.88	8728.39	7209.61	8028.63	7272.06	7809.97	8494.48	8107.63
Mrc1	26434.4	25140.5	22524.3	22739.9	20245.3	19950.7	26354.7	25955.5	21053.3	20961.4	26633.2	26637.3	20169.4	19406.1	25850.3	27814.7	27521.8	26379	30361	32123.3	31344.2	33105.7	19457.5	19914.1	19946.6	19286.5	17634.7	20466	20690.7	20706.3
Itga6	174083	157323	173287	157153	155367	147320	165605	157917	163571	157288	173310	167535	168061	163496	204307	187959	200423	200215	192723	184407	180934	193340	192630	188877	197777	182905	186913	174376	175935	178634
Vars1	15223.9	15703.2	15463.9	14852.7	15814.9	14863.7	14768.2	15612.4	15319.7	15002	15157.1	15725.6	15866.9	16026.7	11155.8	11744.7	11812.3	10654.9	11523.6	12390.3	11264.8	10037.8	11058.5	10640.5	11236.7	11405	12432.6	14147.4	13105.4	10737.6
Ephx2	10213.7	11205.7	7502.22	8093.94	7060.85	8263.52	9439.76	8631.64	6915.56	6373.55	9055.89	10107.2	8224.34	8206.9	12723.4	13387.5	11231	12985.9	12802.7	14597.2	12352.7	12016.1	11023.9	14273.8	11252.7	13307.2	14265.2	14983.8	14013.1	16340.3
Ablim2	6012.52	5949.16	5117.35	6378.59	6238.38	6865.82	6730.54	5667.77	6723.5	6899.29	7804.7	7835.18	5733.11	6714.82	9649.98	10706.7	11267.1	10865.7	8228.16	10304	10063.6	9321.17	9566.61	9671.97	9179.62	10901.7	10814.6	10760.8	10489	8437.53
Gnb2	63994.5	59704.2	59067.8	66072.8	53368.5	53785.2	56291.4	49194.4	57611	57319.2	75567.5	80182	72140.3	58442	80817	78713	72639.2	73983.9	69723.8	77879.6	69587.6	67671.9	89535.2	77369.2	71049.9	57814.1	66593.3	75165.8	66288.6	64432.3
Vwa5a	128037	128107	128874	123568	124437	124556	121250	128633	126142	127625	133905	145288	134039	134912	162176	161025	159334	165242	154960	160760	162972	160163	162519	172200	153458	155560	154214	156234	150218	153977
Vat1	279375	270572	255141	227163	236040	243728	252201	254043	253574	244241	285936	284427	267037	266922	376823	358764	361399	354790	366318	360160	362667	374753	374541	366004	365437	362345	349838	338992	359156	374224
Vat1l	391849	393241	419134	368223	358499	349773	343500	340918	377591	366890	380685	380896	290019	322324	426930	371424	372751	365264	353998	338010	337834	326954	354925	377877	419325	397017	376315	340789	388501	378135
Lgals1	464886	443989	429045	422531	306652	398223	453557	470079	361348	403948	474954	586772	482590	426132	641758	671911	550695	657141	656387	606314	500873	531626	591670	649504	572442	532765	635144	599104	460467	567920
Paics	49895.7	49128	55798.6	47035.8	51756.7	50108.2	50331.1	46878	52804	52327.6	53494.5	52608.2	55391.8	57021	62541.7	58907.8	53023.5	57255	53414.6	55814.7	53826.2	52371.3	60071	59980.7	58539.8	58964.3	61267.3	56141.2	53794	52691.8
Egfr	12449.1	12358.8	9500.27	10263.8	9033.37	8837.87	9654.62	9955.83	6232.7	6117.74	7231.86	7882.06	5982.05	7215.51	12642.6	12914.4	10054.7	11325.2	14079.2	13691	11940.6	12508.1	3692.22	5249.11	4282.52	5691.53	3620.81	6167.05	5589.63	6134.56
Hgs	26794.8	27059.5	27732	26147.5	25983.8	26703.2	25435.3	27034.4	27169.4	26802.9	25608.8	28308.5	23065.9	26079.8	25649.4	26393.2	23867.4	25041.7	24164.2	26277	26894	27648.8	25749.8	27828.9	24918.1	25729.4	25559.2	27245.8	25634.2	26508.6
Arrb2	23650.9	28070.4	22328.8	31221	24548.5	30806.5	26119.7	26201.1	28425.4	28020.3	21781.2	27240.5	23712.3	24966.4	21930.4	24208.2	23188	25029	21407.8	25313.3	23352.4	21489.3	19248.5	25550.4	21060.3	24693.3	18778.2	26455.3	21468.8	23088.6
Arrb1	13907	12008.2	11963.1	10471.4	11022.8	12049.5	11529.3	11659.3	11182.4	10701.8	12537.3	14470.8	12155.6	12975.9	18375.5	18782.7	20197.6	17273.1	14981.4	14544.5	16572.3	18574.3	17211.7	18171.4	17472.5	16821	17604.3	18053	16382.4	16378.4
Myo5a;Myo5b	5461.94	5184.47	5400.25	5653.96	5970.41	6462.1	5366.85	5380.37	6370.35	5928.9	5480.75	5838.38	4401.17	5091.74	7215.72	7728.29	6381.11	5943.44	5437.23	6875.78	6334.17	6561.61	4503.73	5977.75	5919.14	6714.71	4607	5942.24	5777.94	5451.87
Klc1	48357.1	42867.4	48982.9	46866.3	48420.3	47119.3	43803.2	47694.8	48490	51329.4	45691.5	47351.7	38876.3	40088.1	40692	44065.2	40289.3	37480.7	38372.7	37936.1	42699	38420.7	43994.6	43449.4	42445.5	41622.8	35308.9	36842.9	39704.1	39873
Iqsec1	4695.06	5721.04	6283.78	5562.95	5944.46	5735.72	5565.23	6198.22	5514.41	4994.53	5711.09	5595.15	6487.39	5678.13	6403.31	6530.53	5936.24	5940.29	4931.63	5423.54	5642	5457.11	6084.67	6513.45	6578.19	5869.65	5631.06	5251.77	5717.52	5696.84
Creld1	11940.1	10711.1	12786.8	14133.1	12698.3	10668.3	14009.6	11725.4	14257.4	12538.2	13299.8	9886.98	11055.6	10966	10118.1	9811.93	8890.23	8744.77	12053.8	11104.7	6522.7	7262.09	7773.02	8808.65	9949.25	11114	8241.92	10874.2	9140.65	10481.5
Cyp2j6	5667.88	4980.66	6124.76	4397.32	6792.18	3922.39	6997.5	7007.14	6521.56	4508.22	5231.41	3702.1	6335.39	7323.73	4117.36	3314.89	2942.72	3341.12	3817.18	2693.54	3527.44	3981.52	2455.07	3586.39	3462.03	3122.72	2787.31	3415.51	3273.1	2686.91
Ctsf	1264.9	1256.16	1523.94	731.886	1238.29	NA	1316.04	NA	899.487	2191.07	1332.4	NA	NA	1804.78	1482.61	NA	NA	618.672	NA	NA	905.104	NA	566.726	NA	NA	NA	1381.92	NA	924.492	NA
Ston1	8582.82	9533.85	9238.46	8297.17	8982.69	9316.44	8395.34	8632.63	8848.24	9261.92	7573.55	8645.84	8561.8	9293.29	6115.46	7051.76	7429.38	7193.7	6850.83	6823.2	9009.74	7370.62	8488.77	7507.77	7177.48	7549.74	7653.75	6150.34	8214.19	8284.65
Psmc2	21167.6	21491.9	20116.1	21179.2	20647	20672.1	22304.8	21877.3	21493.8	22381.3	22731.4	22606.6	18647.7	21073.9	16996.1	17113.1	16898.9	15054.2	17719.5	16252.1	14493.5	14761.6	14823.1	15707.7	14729.7	15930.3	17289.3	17393.8	15514	16317.1
Actn4	77052.8	75401.3	66331	65890.1	56885.3	58478.8	65503.1	62474.8	59435.6	60099.7	60972.7	62817.5	59941.8	59681.7	91652.3	86327.6	84882.1	80336.6	84658.4	80798.1	76245	77003.8	80097.2	81362.7	76424.4	74496.8	74835.2	74212.2	94585.6	96857.1
Actn2	10126.4	10776.2	9345.66	10448.8	25158.5	25102.9	10258.7	10970.5	57279.7	52740.9	153244	150076	6397.78	6768.57	34382.4	34694.5	284434	277772	206679	199531	88305.9	83937.6	NA	NA	14676.1	16286.1	72169.6	68712.8	30242.5	31054.7
Actn3	2329.66	4305.13	5206.4	4592.35	91220.3	91704.2	21680.2	21445.4	164193	163561	212290	215911	5328.22	5193.11	172496	166517	132664	128032	522310	501366	15837.8	13508.6	1075.3	1765.4	110221	101246	602850	541366	366375	389123
Kbtbd11	1919.77	2249.27	1612.39	2095.96	2315.66	1963.61	1587.32	2017.39	1637.26	1710.96	2094.5	2217.25	2021.13	2176.51	2043.58	2629.31	2224.35	1960.14	1812.54	2319.69	2304.53	2423.85	2604.18	2756.02	2109.6	2632.13	2261.94	2405.45	2316.22	2097.34
Akr1b8	22378	23369.7	19850.3	18461	20868.6	18762.3	17887.4	17716.8	20276.3	18579.9	20497.8	22839.2	24383.3	26882.9	25093.6	22851.2	28334.3	27048.8	30000.7	28567.8	24097.6	31208.5	22994.4	30406	31095.9	29264.6	31212.5	30402	31539.7	28976.1
Glul	65220.4	59789.8	55327.3	49774.8	40815.5	42529.4	54898.3	53143	46896.9	45218	73191.4	77159.9	76783.1	58854.2	67918.7	59724.2	67103.2	62159.2	66120.9	61689.4	53813.9	47410.7	55146.6	59235.1	49942.3	45038.6	61983.1	68564.7	54231.6	61524.1
Pttg1ip	6734.82	5896.4	6580.95	6104.8	6656.68	5923.67	6701.54	5737.22	6747.21	5755.2	4862.05	7404.59	7361.86	7456.72	7207.05	8262.16	9584.99	7342.48	7438.33	7264.97	8945.46	7917.94	6239.41	5533.25	6469.65	7395.15	6820.2	7383.4	7303.3	7290.27
Gnb4	8484.95	8917.67	8183.9	11166.5	4336.8	7396.77	7873.87	6845.58	8289.11	9576.01	9505.22	9806.16	7324.13	3925.72	7761.43	9107.74	5864.56	5777.76	7680.72	7610.98	7283	4016.29	7340.34	8111.99	9664.29	8089.1	11204.8	7192.18	7151.49	6633.9
Ap2a1;Ap2a2	38869.1	37398.2	43651.5	36976.6	30231.2	31068.8	41130.7	44095.8	37793.3	36607.6	40065.5	40206.1	41734.4	34886.9	35835.8	39999	40357.4	36756.6	39397.9	40552.7	37045	36487.9	41112.8	37867.5	35037.1	38510.8	36845.9	39399.9	40761.9	40013.7
Limch1	53856.5	48783.8	50528.8	52109.7	53362.5	55011.8	45948.3	46189.5	48242.9	51995	50964.2	51842.8	56650.4	55048.9	53659.9	52804.8	50878.6	54247.9	47024.5	47862.7	52498	52262.5	57018	59155.2	58179.6	55968.8	54800.6	50861.1	49920.2	49491.4
Thsd7a	873.528	938.824	1015.8	1233.6	1716.23	975.8	1475.75	1036.44	1057.99	1133.95	853.593	1332.18	NA	1091.75	1641.43	1972.14	1412.15	1599.05	1756.44	1645.16	1381.28	1584.89	1495.63	1484.81	1700.57	1421.63	1939.74	1516.85	1721.49	601.769
Kcp	4093.64	4948.69	3830.25	3973.77	4265.65	4387.32	5631.22	5576.41	4665.42	4348.71	4292.57	5105.35	7357.57	6878.31	4046.06	4291.22	4817.08	4679.37	4259.55	3249.52	2889.71	3774.26	4162.2	4960.62	4870.1	5335.23	4647.56	5676.18	3466.51	2855.91
Tbc1d10a	3274.94	3504.38	2664.08	3485.29	2755.45	3022.74	2757.03	2779.63	2948.05	3122.4	2774.84	2817.15	3274.18	3867.25	2899.57	2778.82	2800.2	3534.8	2042.09	2934.19	3147.76	3320.87	2854.07	2577.23	3204.12	3453.5	2541.62	2964.34	3417.43	3580.62
Itgb2	3414.85	4336.79	3972.08	3607.26	2667.91	2883.31	4110.98	4624.05	3276.51	3108.77	5025.3	3904.13	5033.52	5046.49	5327.37	5676.32	5611.29	5689.37	6250.65	7487.62	7187.51	8268.59	5430.03	5136.63	4233.48	5351.61	5253.19	5064.3	6096.7	5166.78
Rps3a	107933	108994	113009	108280	97625.3	95875	123977	120892	117884	111772	114741	110577	88998.9	109984	87034.7	74082.8	80075.7	78204.5	78650.3	72450.2	70915.1	68177.1	67598.6	63669.4	72282.6	75726.5	85098.3	76816.2	79245.9	79594.1
Adgra2	569.094	631.506	210.802	804.932	381.582	530.43	984.846	748.587	NA	487.795	644.656	615.325	1100.39	332.764	515.963	NA	NA	613.779	362.434	1016.34	469.513	799.268	569.819	886.126	186.219	NA	851.192	613.008	593.793	1169.49
Trex1	NA	NA	NA	521.117	NA	NA	NA	NA	435.295	NA	NA	NA	NA	NA	NA	NA	NA	NA	NA	NA	NA	76.7827	NA	NA	NA	NA	NA	NA	NA	NA
Itprid2	10217.2	10490.6	11344.8	11938.4	11372.6	12057.8	10532.6	10995.3	11373	11997.8	9965.63	10113.8	9874.72	10280.8	7400.42	8318.13	8367.04	8378.33	6933.96	6262.1	7383.93	8414.73	7926.21	7804.76	7967.1	8525.93	7500.15	7511.4	7912.34	6772.11
Speg	NA	NA	NA	NA	1439.85	1212.65	NA	NA	1597.16	1584.94	2347.07	2109.68	3029.26	NA	1503.6	1203.06	1924.81	1805.39	4153.74	4489.08	NA	1487.01	NA	2902.04	1191.16	1266.85	3625.87	3799.07	2438.33	2258.13
Cryzl1	16710.1	16096.8	18130.8	16535.2	14387.2	16070.5	13765.9	14356	15501.4	16584.2	15462.2	13872.2	13668.8	12063.1	11713.1	11233.7	12114.9	12094.8	11967.9	12417.9	13175.4	13205.9	12850.2	13878.2	14157.2	14498.7	12608.8	11756	13730.8	14754.1
Pc	66014.2	61679	43750.1	41253.9	38679.3	36645	48744.3	48492.1	39956.3	38814.7	61191.1	56820.2	61028.1	58294.5	62525.4	60702.1	61255.6	61591	65994.3	65579.2	62845	61258.9	58576.8	59147.5	59446.8	60037.5	90747	88870.6	97323.1	92829.9
Pdlim5	44151.4	35258.9	30591.4	29405.7	35086	41902.8	31550.3	34546.8	40864.2	44272.1	55798.9	58902.4	45804.1	35040.2	58884.9	62679.8	82866.4	87570	115201	110831	55183.1	58561.1	34616.2	55157.7	53552.6	52261.9	96088.1	99554.3	73116.8	77514.9
Cct3	63003.2	61697	63841.3	59698.5	57990.1	60088.3	61176.3	65117.1	59783.1	60225.7	65129.2	71915.1	60461.5	65148.9	60854.1	58876.2	60086.4	63147.2	56649.1	57558.2	57623.2	58721.5	59322.5	63634.8	58704.9	56317.4	59477.6	62408	55432.7	59251.3
Acacb	7328.12	5465.68	4167.97	5346.48	6891.75	6389.87	5862.34	5855.8	5278.62	5360.27	7876.64	7807.41	8508.64	6565.36	6869.51	9267.78	7342.74	9724.65	9195.3	12569.4	9220.95	9408.67	4654.42	3875.44	5275.1	4438.09	11100.2	10700.7	8055.25	8287.02
Ktn1	9700.89	9778.47	9997.7	9432.22	9707.94	9905.62	9575.89	10057.9	10656.1	10519.9	8889.64	9781.83	8463.58	8465.68	6946.04	7279.87	6592.98	6348.46	7618.25	7602.7	7107.73	5740.23	7138.71	6853.78	7013.79	7389.36	8846.99	8368.9	7821.42	7173.34
Atp1a3	93687.3	86854.2	93163.5	97572	93052.7	93026.9	81513.1	85999.1	98100.3	96182.3	96605.6	94797.6	101295	97456.2	99577.4	107179	96024.1	96518.2	90352.2	85466.4	96443.5	96824.3	106849	96835.7	116162	97423.9	103548	95877.4	90903.4	103167
Nadk	2645.93	3162.63	3351.8	3780.37	3721.76	3458.99	3246.37	3612.64	1698.33	3173.13	2590.44	3442.62	4256.35	3430.06	1639.79	2709.26	2191.96	1822.1	1531.03	2766.76	2774.35	2540.54	1345.5	2666.71	2003.94	2579.71	2087.62	2281.21	1796.07	2678.8
Dop1a	3409.66	3003.43	2800.39	3827.28	3426.11	3189.78	2206.72	3389.14	3096.75	3448.34	1873.63	3566.78	3365.15	2585.16	2711.52	4068.44	3551.97	2465.15	5176.65	4053.2	4228.68	4128.55	1992.08	2367.21	3571.91	2709.75	2384.52	4548.5	2530.09	2513.18
Prxl2b	10906.3	11597.9	11492.4	10796.9	11027.1	12356.5	9706.55	11776	11928.4	12593.9	14777.3	13968.7	10141	12687.9	11439.1	13190.8	10388.1	11636.1	14647.9	13789.5	11547.4	11644.6	9658.92	12153.7	11342.4	11204.1	15163.8	18105	10735.7	14466.1
Actr1a;Actr1b	61578.1	62380.1	64355.6	58079.1	59348.4	61561.8	71929.9	66639.6	74331.2	70072.5	71098.8	74282.8	58305.9	78058.4	67545.9	58560.1	70128.5	66777.4	69370.2	68869.8	64979.3	64427.6	59837.3	58266.2	69249	63611.7	61252.3	61971.1	69785.5	66433.6
Actr1b	14326.8	16072.6	16325	15375.5	15802	14102.8	16964	16951.1	15836.5	13318.4	17212.2	18085.4	13871.6	13045.7	15446.3	11009.9	15528.7	11890.6	11868.1	13363.4	14246.2	12553.7	12654.9	12682.4	14684.1	13187.8	14341	13889.7	12366.9	12514.9
Actr1a	44129.6	46356.2	46201	46679.4	44458.9	42775.9	45069.6	42751.6	45518.2	44414	46571.2	41956.7	48688.6	45211.5	39827.7	50729.4	53858.6	50484.2	43686.2	48140	41165.5	43822.4	41369.7	42453.8	42723.9	41231.7	44073.2	44347.6	42551.4	41198.8
Jph1	NA	NA	NA	NA	1523.48	1600.91	NA	318.843	2897.98	3125.02	3743.46	3779.89	NA	NA	2196.27	2181.39	1930.96	2400.42	6300.31	6936.11	1081.62	NA	NA	NA	1380.45	1235.38	7444.87	6938.88	4148.06	4690.44
Cbl;Cblb	5298.81	6771.01	4891.03	4670.92	4122.02	6565.03	6603.48	6274.45	6102.41	5296.29	5816.35	6192.92	2918.08	5351.06	5699.26	6356.08	5206.34	5105.97	5582.98	6678.28	6308.91	4979.59	6349.49	5912.08	4385.47	5956.14	6905.25	7138.17	4371.59	5904.95
Igkc	49175.4	39331.4	39173.3	47314.1	29217.1	28621.7	27498.6	26756.6	33195.4	44552.9	31894	32991.7	28247.2	24816.4	37826.1	45633.2	33835.4	40200.4	39104.2	59843	66936.3	71491.3	37541.1	45107	69664	64534.7	72859.5	78929.9	49710.2	36618.7
Mtch2	28486	28843.1	32020.8	25845.1	29991.1	26932.8	31598.8	30558	32475.4	30599.1	37898.6	35212.5	36880.1	32117.6	32936.6	28980.2	32322.3	31841.4	35562.6	36477.5	25447.9	30278.1	26589	26295.7	25040.4	29196.1	34055.6	32108.9	33203.9	26239.3
Ank1	50748.4	51481.2	103415	98329.5	28160.8	30008.8	74966.1	74048.3	33877.8	32315.2	39976.8	42292.4	44754.9	42080.9	108962	108653	22221.1	25150.1	31242	31751	25201.8	27408.9	41675.4	40530.3	76320.9	79977	68220.6	72149.6	47812.4	47398.8
Myef2	15963.9	15745.7	15497.2	14363.2	17400.3	15373	16899.6	14820.7	15583	17278	15712.8	14112.4	14326.3	15223.7	9361.97	10796.1	9672.54	8827.26	8613.17	8053.17	9799.43	8971.18	9909.24	9473.63	11139.9	8716.8	8554.17	9843.71	10425.1	10199.8
Sacs	2795.19	3166.07	3012.73	3109.74	3377.35	3496.03	3406.6	3288.98	3501.58	3542.15	3232.6	3479.59	3238.55	3345.87	4413.56	4122.33	3740.28	3942.25	3079.94	3332.6	4044.97	4616.3	3545.32	3875.54	4153.44	4788.56	3382.34	3930.3	3781.27	3353.43
Erlin2	31107.8	31971.1	31098.7	30479.9	33336.9	32230.5	34194	34148.4	33563.1	31893.6	35073.2	32327.4	36618.1	34138.8	28409.4	28061.4	30561.2	29907.2	27988.9	28558.3	30629.5	29242.4	27828.8	29579.4	28715.6	26975.8	27044.6	29522.7	25915.7	28929.7
Dync1i2	62991.8	58176.5	57139.4	54656.7	41762.6	38613.4	40255	43439.5	38847.6	39076.8	42334.9	44594.3	28345.2	34373	38378.2	42482.2	32573.6	39150.4	39212.9	41786.9	33819.4	36800.5	37585	39095.2	42874	38055.1	37606.2	39344.9	36724	43052.8
Myh7	23183.6	32990.1	94563.1	77281.1	NA	NA	12018.7	14329.2	NA	NA	37120.4	35166.3	33507.7	35015.8	27527.5	27420.3	2704900	2338670	889216	822119	456358	516069	NA	10221	NA	NA	20444.6	22339.1	43242.9	30814.6
Dkc1	5782.05	6769.5	5292.93	5800.17	5728.99	6751.69	6185.7	7079.3	7219.29	6312.72	6698.26	5454.98	5518.9	7227.81	5345.56	4697.29	5190.74	4463.43	5459.7	4089.78	4727.14	5579.03	3373.85	4601.66	4002.93	5929.69	5804.62	5828.32	5430.41	5488.69
Anxa5	685395	651223	684011	639661	612562	610999	722542	701605	674793	663948	640940	668242	551284	629483	819115	762746	852914	773785	800769	770454	813509	808446	892316	919632	853320	818329	821637	795380	857606	908096
Fabp3	46902.6	41022.2	41808	36355.8	51861.3	48191.1	46298.4	44308.8	66936.1	63712.6	89387.4	85469.1	44999.6	55631.1	63815.4	58070.7	191578	182012	165044	146755	97152.4	104852	63601.8	67692.6	80695.8	70152.5	100040	98546.9	91613.2	79072.3
Cask	9876.29	10079.9	10520.2	10410.4	10886.3	10755.3	10191.7	9905.53	10667.5	10847.3	10183.5	10132.7	8919.48	9833.22	8715.4	8467.81	8587.58	8866.94	8163.46	7799.26	8056.87	8547.12	9609.13	9722.86	9044.17	9446.37	8015.74	8593.02	9717.86	9669.19
Atg3	15599.2	16842.3	14633.4	14811.5	15940.3	15053.3	14942	13334.8	15753.3	13665.2	14995.2	14888.8	14780.4	15074.7	15486.8	15620.8	17674.6	16887.9	15954.2	13163.3	15186.5	14610.2	17446.4	16185.2	17338.2	18002.6	17919.2	16619.3	18146.5	16876.8
Acot2	4727.89	5170.33	5341.74	5482.55	4412.62	4356.25	4881.67	3724.77	6264.73	4527.35	3990.28	4524.51	5776.71	3609.15	4860.52	4828.93	6280.1	3327.93	4869.62	5250.19	2167.49	4401.27	4716.78	3213.12	3704.88	5769.6	4928.44	4259.38	7890.88	3755.98
Snta1	56756.9	53777.6	57567	55840.7	63412.8	55964.7	55806.8	48431.6	59959.5	59045.3	63077.8	61124.2	53049.1	56015.3	71791.3	69123.3	71990.4	68988.2	72925.9	69469.1	67808.6	64471	59002.5	59218.5	59306.8	57265.1	67031.3	65978.9	61638.9	63547.4
Vamp1	2999.97	3030.76	3433.63	4877.17	3772.6	3875.9	2718.25	3045.49	3164.29	5131.33	3387.36	3160.17	3101.92	2620.84	2879.77	3696.63	1830.19	2807.15	1938.22	2653.89	1865.43	1881.4	2553.77	2955.02	3713.68	3182.16	2401.45	3164.13	2400.92	3143.67
Vamp2;Vamp3	16082.9	15495.1	16574	15530.4	16381.5	19616	15548.7	16810.2	14256.6	13990.1	16190.9	16145.6	14088.3	16557.2	14115.2	14506.5	12144.2	12959	13382.7	14308.5	11955.2	14329.3	13235.4	13921.9	12801.9	15147.5	11065.6	13373.7	14199.7	12706.6
Ltf	1071.13	NA	888.501	1269.75	NA	NA	1217.38	1223.07	NA	NA	728.468	1056.97	2024.83	3138.56	1161.14	1159.64	1491.14	636.225	1267.06	1067.96	1948.81	2230.16	NA	NA	NA	897.534	1453.23	1344.83	NA	NA
Xirp1	986.066	732.944	NA	493.096	903.992	1013	793.569	1005.41	1643.46	2059.13	1934.54	2025.81	1207.74	958.765	677.524	1168.59	2270.4	1755.44	2119.77	1708.04	1097.02	1160.55	NA	NA	956.653	652.215	888.324	1441.92	1177.63	1387.99
Ccdc115	704.167	885.386	645.628	719.475	1184.55	883.58	610.911	673.592	935.803	1003.85	738.033	949.161	637.321	685.061	743.157	985.36	599.094	1139.05	733.86	733.403	600.82	1003.84	1153.36	728.069	464.729	824.668	715.82	707.739	900.116	630.587
Gorasp2	12322	12243.3	10948.9	11462	12069.9	12638.2	10438.5	11820	11382.9	11855.4	10380.4	11051.8	10570.2	11417.4	7468.55	6295.15	7824.6	7386.86	8052.26	7825.92	7581.94	6691.17	5888.76	7741.75	8042.78	6875.25	6845.65	7258.52	7179.97	7082.53
Shroom2	7129.55	5903.66	6246.17	7431.43	6475.3	6935.78	6168.51	4966.62	6562.34	7095.52	4830.88	5865.35	6523.07	6619.25	5054.37	5160.83	4634.6	5331.29	4535.56	4339.29	4237.56	4164.72	5757.32	5331.89	5003.31	5823.01	4847.69	5610.93	4873.65	5397.7
Ahsa1	58555.4	56282.8	57172.1	55646.9	57323.9	51228.9	50916.3	48719.5	56997.8	52336.7	51399.4	51461.2	44438.7	48520.3	63871.3	65895.1	67590.5	71053.6	65106.6	63684.3	64759.4	68152.1	69570.2	72213	63845.9	68430.8	67360.8	60499.7	69584.2	66907.4
Adam22	6739.04	8228.05	6371.46	8222.95	7377.67	7462.89	6702.3	7596.41	7378.32	8927.14	8800.39	7958.84	8954.34	8022.46	11771.7	8598.46	8239.87	8994.25	8605.78	8029.37	8942.17	8851.99	11347.3	10336.5	9666.6	10388.7	9086.6	9287.41	8534.52	7611.95
Tufm	75270.4	83844.8	80970.4	75652.6	77160.5	75393.6	80604.3	71345.8	82848	81235.2	85497.8	83628.4	71705.1	75106.9	90349.8	79575.8	100127	97261.1	110411	96549	86425.1	86012.8	77211.5	78538.7	83123.4	81064.2	101794	97336	96207.9	91323
Itih4	29849.1	25992	22159.3	20652.9	19020	20026.7	23406.8	23741	18689.3	20041.3	22614.7	23700	23578.2	22504.3	17799.2	17385.7	16505.8	19331.7	15634.3	16424.4	20578.8	20908.1	19325	21414	27032.9	29366	24266.3	24345.2	22178.8	25014.4
Ufl1	8912.65	8215.67	8026.61	8968.16	9239.69	8778.32	8976.37	8983.79	8574.9	8193.37	7639.85	7525.42	8114.49	8196.09	6025.97	6964.65	6454.24	5749.43	5525.1	6432.13	5188.43	5434.68	5952.22	5771.81	6961.95	6869.58	5567.74	6575.02	6362.54	5871.89
Ap1g1	13935.7	14831.4	14629.9	13789.1	14740.3	15181.1	15042.1	14882.8	14700.9	14716.4	13231	14207.2	13537.6	14741.6	13127.5	12263.3	13278.1	13320.7	12801.2	11878.6	12787.2	14784.9	13094	14070.2	13223.6	12476	13086.4	12239.9	13694.9	12173.2
Fbxo6	4310.08	5734.3	6003.75	6868.24	6410.96	5374.63	4681.15	5609.51	6588.53	6568.95	5535.3	7383.62	7214.99	7653.9	6490.6	6543.07	5213.69	6604.66	5195.62	7132.8	6420.77	5862.62	5049.5	5783.44	6016.11	5993.31	7025.02	6961.87	6374.54	6482.92
Myof	7970.71	7767.06	6569.72	6208.15	5866.47	5485.03	7860	8157.69	5862.39	5991.06	7159.5	6847.52	6292.72	6106.47	11045.9	10490.7	10628.8	11081.8	12003.3	12677.6	12820.5	11252.9	7298.98	8101.56	7952.23	8700.22	7860.43	7101.64	8474.79	8694.93
Septin5	7379.21	7951.77	6617.09	7613.09	8049.54	7599.82	7653.27	6962.84	6424.19	7615.75	8112.31	8461.88	8223.81	7513.62	7346.16	7513.83	8849.56	7609.96	7020.18	7234.69	6948.49	7587.12	7459.03	6993.56	7500.65	7526.26	8186.29	6827.92	6746.41	5424.14
Zc3h14	1856.29	1808.28	1976.34	1694.25	2006.07	1809.61	1828.74	2048.32	1594.3	2363.76	1538.85	1572.99	1859.32	1734.57	1043.98	2224.37	1367.39	1384	1765.17	1188.33	1297.52	1980.06	2132.83	1277.68	1543.14	1828.59	1883.29	2259.28	1716.31	1362.63
Scp2	58590.8	56892.2	55579.1	47248.6	49151.5	50018.3	59590.1	51802.4	48855.7	45520.8	48983.8	48243.6	49863.2	54476	51584.4	47794.8	51364.8	52908.9	50367.2	42352.9	51452.5	46526.9	43297.3	40450.2	44999.4	47967	44130.4	38962.3	50716.9	49036.5
Wbp11	2186.37	2274.01	2026.31	1913.67	2616.21	2362.69	2331.71	2433.59	2485.56	2579.38	2214.59	2092.63	2342.2	2350.49	1645.82	1690.8	1878.08	1657.92	1274.61	1664.26	1608.41	1566.21	1271.06	1374.46	1609.49	1484.12	1516.92	1783.96	1442.65	1580.04
Nes	122675	120770	137335	133170	133608	135612	111221	110552	108894	115738	103905	105353	98248.7	102464	78031.3	80731.3	71914.4	69797.3	69104.6	69005.5	70499.9	72183.9	78414.5	78705.9	85000.3	82225.1	79564.5	81054.1	78865.3	80927.3
Fat4	5715.37	6282.44	6810.24	6335.79	5114.71	5945.71	11788.5	9068.24	8811.52	6952.6	9293.44	5968.32	7965.75	7435.76	NA	NA	21258.2	NA	16942.4	9754.7	NA	NA	14431.7	13027.1	NA	NA	NA	8212.39	19048	17374.3
Rbm39	9895.15	9489.17	10406.8	10176.5	10016.5	11054.9	9482.37	10527.5	9738.97	9831.08	8635.59	8412.45	10359	9962.85	6695.43	6911.8	7295.28	7928.18	6785.55	6825.53	7173.95	6429.34	6327.52	5798.84	6531.86	7635.08	5676.3	7102.99	7993.48	7578.26
Tbc1d9b	11617.8	11425.4	10990.3	10369.4	11168.4	11962.1	11580	10193.1	11142.9	10143.2	10984.2	11595.6	11046.9	10605.6	7452.94	9087.62	9155.35	8899.07	9018.19	7616.99	9954.37	9271.5	8339.6	8487.28	9349.85	9160.39	7830.2	7667.61	8791.15	8224.82
Col18a1	37739.3	38561.8	29447.2	32394.3	28946.2	32231	31952.2	32577.2	30470.5	27521.7	30505.2	33968.3	27235.4	30339	57553.7	54086.1	55154.1	55643.7	52920.5	50709.5	58011	59294.1	52649.5	55366.6	49603.1	46084.1	45132.2	46463.9	47214.5	46890.6
Letm1	13526.9	14467.5	14255.7	13834.3	15244.7	15532.6	14219.4	15573.3	14720.1	14845.2	15881.6	14257.1	15116.8	13698.5	14831.6	14654.2	16512.7	16621.4	15546.4	16574.8	14123.8	16722	13386.8	13935.7	14429.7	14428.7	14911.2	15346.3	14545	15597.1
Eif5a	39773.2	36363	30498	21101.9	35523.1	30448.9	25924.8	22585.6	33386.1	23620.8	30974	29359.3	20153.7	21640	21861.8	17546.2	14610.6	18479.9	21859.5	20444.8	24314.2	20003	27823.7	22282.3	24668.7	21377.1	21128.1	18566.9	17474.2	18113.9
Cd163	14818.5	14058.4	9524.74	11961.4	9726.96	10778.7	13426.5	12167.5	9378.56	10776.9	14166.8	16947.6	12718.7	11001.7	19390.9	19769.3	18473.9	21254.5	18547.1	22126.6	21150.2	19004.6	12550.3	12978.7	13668.7	13134	13623.3	17731.2	15528.6	13127.8
Ttll12	25482.4	26044.8	24711.6	22258.3	22525.7	23439	22268.3	21119.7	21174.2	25036.7	24634.1	24050.7	22475	22254	23597.6	24446.1	24208	24306.6	26524.9	24703.5	22196.5	24514.3	26146.4	26843.1	26423.5	26114.7	23724	24374.4	25547.5	27278.3
Etf1	21362.4	19657.4	19389.7	15322.7	18902.3	19906	17339.5	19338	16499.1	16834.2	16406.3	17508.6	17154.4	18605.4	12936.5	13634.5	12390.4	12116.1	12268.2	11467.4	11365.8	13597.4	11602.9	13155.9	12031.3	14339.8	13307.6	13032.8	12063.5	13351.1
Cltc	194624	183964	200647	180848	178925	174198	186896	183967	183596	175009	183991	187336	168843	154287	166347	163815	152878	155084	158875	152820	156054	154413	160336	158807	166730	161143	145377	141309	144822	149779
Elob	30708.3	32093.1	28640.8	26842.6	35052	32466.9	30316.9	31273.4	32814.5	31981.5	35558.4	32799.6	31242.1	35258.8	29683.5	30117	31843.9	30680.5	28930	31637.5	31253.3	32169.3	31268.9	30208.7	35465.6	32436.8	34142.9	32662.3	31723.8	25333.3
Dars1	47577.9	45161.2	47205.3	44821	46918.3	46213.8	46651.6	45947.3	46397.9	44973.7	49595.9	49452.7	42767.4	46730.1	43853.5	41897.3	40230.1	38991.3	40526.2	38990.6	38398.5	39119	41600.5	41196	44419.3	41883.8	44425.5	44216.9	41245.8	43514.6
Smtn	19425.1	17154.3	13697.1	14933.4	13654.1	14214	14567.8	15329.5	12607.2	13670.3	12801.8	13225.8	13512.3	14560.3	12022.1	12333.3	11312	10879.8	9418.77	10474.5	9845.67	10556.8	9986.24	11242.6	10723.4	10086.7	9753.09	10007.3	18713.1	18580.3
Snx27	30481.7	29367.3	31154	31971.3	31167.1	34374.7	33190.9	32101.2	31287.1	35496.7	33047.8	35868.7	31667.2	31329.8	33957.2	35463.5	30315.2	34285.7	28658.5	34520.2	31966.7	31936.2	32847.6	30874.8	31995.7	31910	29537.3	32300	32632	31337.6
Pitpnb	13677.9	15078.4	13483.2	12178.2	13401.2	12867.8	12365.1	12115.7	13464.1	11554.7	13384.5	12189.1	10712.3	10026.4	8610.35	7067.52	6762.33	7085.92	8053.05	7014.15	7204.3	7472.89	7340.84	8474.52	8914.29	9359.2	8978.37	6964.64	9008.25	9475.35
Nutf2	56882.3	54834.4	47012.3	49306.2	45349.8	49891.8	51910.6	57297.4	58061.9	56711.3	67529.9	73704.5	48123.7	59045.3	86548.7	93903.2	71923.8	75770.3	76499	72507.2	61975.9	60382.1	76129.5	86297.3	75389.8	75185.8	91416.7	85132.7	74519.2	84016.8
Pin1	16898.1	15326	15682.5	15790.5	13545.7	15228.7	11122.7	14227.2	15924.6	13096.4	15437.8	14080.1	12746.1	10293.2	21166.5	23157.9	15811.4	19068.5	19704.4	22656.9	19320	14944.9	18849.7	17969	22347.6	21056.7	19597.2	15565.3	19623.5	18501
Pdcd5	17483.9	18715.8	18905.3	21928.9	17668.2	19175.3	17142.5	18135.6	19333.8	20806.7	19505.7	19971.3	19875.7	19165.3	22651.6	22760.9	21119.5	21237.7	18189.3	22145.9	19136.5	19395.6	24169.2	23596.3	21183.3	21614.1	25193.4	23552	21511.6	21983.5
Ubr1	4099.96	4324.98	4333.06	3928.53	4380.04	4266.08	3748.69	4320.77	3899.62	4407.29	4193.16	4357.7	4207.4	4124.48	3613.13	4285.2	3456.19	3572.32	3330.11	3897.69	2987.1	3514.02	3479.25	3543.41	3497.62	3975.42	3956.83	4155.46	4356.63	3423.74
Prdx1	524187	497893	515667	494824	468144	469399	495895	471829	493193	480134	476771	489438	416598	460273	486502	496178	518407	486643	487960	511508	392635	424528	432529	442257	486732	461388	465362	438694	515325	491467
Aph1a	1223.14	1350.75	1462.79	1206.66	1334.67	1359.39	1468.95	1147.85	1636.99	1238.23	1493.37	1130.2	NA	1292.71	1142.83	775.133	933.719	NA	939.393	NA	1216.22	1037.93	933.312	726.705	1334.03	1017.59	837.461	810.148	984.803	NA
Eif5a2	2155.08	1948.06	2441.53	1967.44	2133.28	2262.44	1029.65	1747.73	1918.03	2132.33	2018.65	1871.02	1237.18	2215.05	2316.92	3098.67	3123.5	2207.86	2158.62	2246.96	2127.79	3426.12	2564.97	2900.15	2624.02	2746.95	3451.15	3728.81	1984.5	2290.3
Cux1	5607.96	5565.55	5018.44	6609.75	5256.58	6605.95	6201.72	6792.48	5295.18	5748.17	4186.58	5336.23	4937.97	5728.39	2068.17	2812.31	3336.94	3534.02	2893.82	1996.32	2383.79	3340.7	2642.75	2433.87	2989.24	2914.01	2570.43	3070.51	2356.29	2912.03
Tmem87a	2984.52	4034.88	4039.38	3849.14	4188.03	4373.88	3968.8	3653.83	4191.81	4227.74	2927.23	3811.54	4149.78	3400.97	1653.17	3028.02	2621.89	751.434	1894.33	2347.5	2295.66	2079.83	2850.08	2508.96	2086.29	1724.29	2469.06	2371.96	2036.36	2791.41
Cfdp1	5947.08	6696.38	5571.57	5879.04	7156.18	5431.77	5035.39	5521.64	7478.76	6472.75	6403.79	5016.57	5879.12	5765.92	4879.21	3417.37	5227.21	5207.09	5565.34	5563.18	5069.63	4387.57	3563.37	5501.73	3748.33	4960.11	4491.26	6084.75	3803.69	4951.69
Slc25a20	19551.5	18517.3	19529.2	19343	19309.3	20153.4	20406.4	19912.7	19779.4	19425.1	23816.2	24941.7	16349.2	19680.8	20159	18936.1	25874.1	24255.6	23595.9	24094.5	20265.9	19743.2	15582.7	17285.3	18017.6	18690.2	23599	24062.7	20259	19619.3
Nmt1	11509	11839.1	10630.4	10221.1	12484.3	13226	13129.6	10358.3	9789.74	12750.8	11951.6	12379.5	10416	12070.2	8115.21	8199.13	10519.2	10803.8	7364.58	8354.24	10087	8182.04	7780.75	10416.7	8826.59	8869.14	10060.4	8604.52	9608.34	9416.05
Myh10;Myh9	110984	108914	106474	101177	88200.3	88980.2	106206	95100.5	92651.6	90293.6	97241.9	97650.4	88952.7	89248.1	134816	141477	132033	116977	113379	107505	106480	102412	128025	125777	117098	119246	118726	111330	127888	121315
Gsr	16599.3	14633.4	14761.5	14176.2	14633.4	14307.3	13733.9	13649.3	13623.7	14392	16268.7	15006.7	16407.9	15059.2	18988.9	19306.7	18257.8	17360.3	18789.9	18654.6	17982.2	17007.1	18048.8	21019.8	19173.2	17477.7	19994.7	17804	19252.5	20660.9
Eif4h	34222.9	27594.5	30042.7	27047.7	32155.3	30341.2	25049.5	25370.6	30026.3	29682	28702.6	26229.2	26459.3	29952.3	21751.3	24512.7	24304.6	24258.4	18128.8	25429.3	24321.1	23226.1	26053	28588.2	28619.6	25603.3	25533.4	22812.4	24224	23986.2
Capza1	28158.4	25444.9	21796.5	22586.9	19548.4	20506.6	17779.4	16852.3	18793.8	19923.1	19757.8	19193.6	17857.9	15719.1	18244.2	16579.3	15983	16368.7	18028.1	18091.7	16708.5	18308.4	18379.7	17852.1	17281.4	15614	16330.1	16944	15226	19261.7
Sardh	10400.2	10722.8	10739.4	11446	10558.8	10858.6	10280.4	10628.5	10383.8	10858.2	9226.5	9028.03	10546.2	10559.6	8939.64	8468.71	8933.42	7696.48	7981.53	8523.11	8091.28	8049.41	8608.4	8955.07	7962.41	9004.9	8679.11	8677.16	9005.34	8287.59
Mmrn2	2661.84	2905.12	2362.78	1634.99	1486.3	1843.19	2079.3	1978.94	1159.1	2208.28	2073.19	1873.55	3656.48	2345.97	2856.55	2765.16	2877.95	2885.89	2559.87	2756.73	2586.17	2325.13	1462.16	1907.32	1260.97	1755.63	2136.96	2173.49	1993.78	2836.88
Dad1	32559	33090.8	32931	29139.5	30326.6	28890.3	35569.1	31946.1	30874.5	29406.2	29846.5	31988	28185.9	29586.1	19578.7	18678.8	20099.7	20986.3	19433.3	19463.7	19704	21359	18573.2	19964	21612.6	21851.5	21172.7	19859.4	20481.1	21514.7
Ttyh1	NA	NA	531.493	NA	867.904	604.011	501.034	713.495	788.933	125.134	419.039	NA	NA	602.582	NA	NA	339.419	449.866	NA	NA	NA	NA	NA	NA	NA	NA	NA	NA	NA	NA
Fam76b	1074.81	944.115	774.011	942.157	1255.63	1293.34	632.631	976.561	1084.68	652.065	525.843	778.769	874.541	997.9	876.248	806.438	NA	556.271	113.954	861.325	868.012	788.848	NA	415.186	482.124	596.933	600.73	NA	NA	653.889
Fam76a	NA	789.264	758.319	753.409	801.764	825.197	786.705	572.33	567.252	437.358	1082.3	418.466	NA	307.405	NA	621.443	NA	NA	NA	NA	NA	NA	NA	NA	NA	NA	NA	NA	537.416	NA
Serpinb6	159508	164348	126236	129590	139332	137122	126862	125423	136839	142679	159810	157907	165171	141995	194126	198904	200626	199672	227780	212194	199816	210006	200738	218155	213182	212865	205494	202422	206856	229944
Serpinb8	2565.45	2805.35	1792.86	2296.74	1833.88	2422.57	2023.53	2266.53	1712.73	2520.5	2041.48	2664.65	3155.06	2918.56	2668.38	3343.37	2654.33	3217.16	2991.46	2758.45	2713.69	4215.45	2649.37	2685.22	1741.42	3027.82	2558.01	2237.05	2640.45	2779.62
Pgghg	3350.4	2745.88	2463.18	2896.53	3249.65	3265.09	2476.55	2647.63	2420.7	2535.96	2872.46	3044.51	3641.54	2929.1	2386.3	2102.7	1991.27	2165.66	1968.6	2464.01	2074.43	2177.21	2005.93	2176.15	2457.84	2524.32	2466.94	3030.6	2277.08	2254.19
Fkbp8	10075.7	10439.7	9226.32	11197.6	10800	10391.4	10790.5	10861.3	9146.6	10332.3	10486.6	10601.3	12106.1	10907.7	7328.43	7249.73	7970.65	7244.27	6372.92	7103.53	7950.08	7155.83	7729	7239.54	6917.17	7472.5	7295.4	7696.71	8253.46	8065.36
Myo1d	14886.1	14745.1	15584.8	15922.7	17359.6	16460	14309	15050.2	15136.6	15934	17252.1	17540.8	16270.3	16023.2	32664.9	33428.4	31459.4	31997.7	29075.7	26511.2	31663	31166.8	32747.1	33800.9	34546.6	33792	31040.8	28250.2	29557.9	31774.2
Ccdc97	445.589	303.934	259.783	524.857	NA	NA	NA	NA	262.033	412.476	233.511	384.582	NA	270.606	496.841	460.535	NA	NA	NA	NA	NA	NA	NA	210.936	NA	NA	NA	463.251	NA	NA
Icam1	4606.78	4847.37	4150.46	3517.51	3372.37	3758.31	3642.75	4553.28	3527.25	3779.39	4186.68	5234.47	4614.53	5150.83	8168.15	8245.68	7095.62	8506.78	7628.88	8314.51	8065.97	9132.19	7439.64	8239.59	7934.22	7985.38	7949.6	8850.33	8769.72	9048.85
Tjp1	23677.2	23956	22159.2	21362.8	22792	22760.8	21221.1	21980.5	23615.8	23219.7	21868.7	21563.5	22311.3	22153.4	27929.2	27515.3	27968.5	27850.5	23876.2	24294.8	25432.2	25754.7	27161.2	27158.8	25624	27499.5	26107.5	24733.9	26598.4	27436
Ppp1cb	64003.1	68512.7	64096.4	57206.1	61554.6	59750.6	58448.9	62133.4	60666.8	58015.2	58617	64343.2	76849.4	70999	75161.7	66243.9	73902.5	73242	75994.4	53724	73387.9	69664.1	64143.6	66616.8	73057.5	70367.5	78469.7	70316.9	77605.1	77311
Mfap4	12287.4	10113.5	5957.47	4163.23	5270.73	3257.96	5026.73	3586.99	7682.33	8381.49	9018.22	9511.08	4849.24	4518.67	11589.6	9495.44	6987.93	3632.08	4574.67	6150.19	4481.5	659.375	11741.2	9912.15	3369.07	7240.09	2556.86	3587.9	11064.3	9270.13
Ranbp2	4737.74	4938.12	4586.14	4980	4973.88	5083.93	4925.98	5148.3	4552.75	5053.02	4694.29	5546.49	4691.03	4818.18	3678.57	4371.87	3735	3962.59	3629.35	3858.54	3898.79	3876.72	3822.94	3982.85	3568.69	4172.61	3640.71	4286.79	3970.96	4228.24
Phldb1	16072.2	17244.1	17601.9	16518.7	17192.8	17714.4	16424.2	17232.8	17008.7	16574.9	14383.8	14756.5	16667.1	16977.2	12644.1	13662.5	13187.8	13394.1	12864.4	12234.4	14138.5	14141.5	13061.7	13245.6	14601.3	13017.3	13081.8	12067.3	12988.7	12773.7
Cog7	3568.96	4468.91	4586.13	4305.15	4699.16	4887.84	5009.43	5019.41	4269.4	4481.71	4769.25	4048.92	3393.77	4506.79	2878.51	3185.11	3552.85	3053.19	2643.68	3174.97	2949.12	3075.78	3659.68	3250.12	2756.91	3765.59	2889.56	3637.32	3121.51	2895.62
Mrpl24	2089.8	1597.93	1652.42	2216.55	1550.67	2623.28	1407.38	1758.28	2031.24	1939.15	1555.95	1643.51	2419.94	1978.07	1700.62	1362.87	1766.51	1851	1707.89	1822.75	1403.27	942.329	1031.89	1285.82	1374.92	1114.97	1712.63	1954.28	1449.07	1527.5
Ca1	24596.2	24578.8	42480.3	45809.7	13052.2	12768.5	39923.3	42475.7	10770.3	11728.1	18431.3	19571.3	17185	22501.4	100704	107336	13160.9	12061.8	20801.4	23116.2	17740.8	18697.4	29721	35340.4	77733.4	76655.3	70660.2	81694.1	34906.3	35231.2
Bace2	760.687	1179.61	744.292	895.881	985.271	1469.86	772.743	1283.67	1333.69	858.669	934.489	987.591	1380.17	929.739	713.336	712.756	486.808	675.253	746.89	918.294	786.93	176.866	777.296	848.403	633.892	962.947	741.907	900.558	834.529	747.992
Sv2b	1170.41	1557.62	1356.75	1357.41	1185.89	1850.91	1498.55	1531.5	2370.05	2174.13	1720.55	1295.92	1471.81	1871.73	1253.3	1533.47	1717.93	1940.06	1383.26	1263.85	1921.15	1993	1699.83	1729.02	1762.43	1376.39	1163.23	1337.88	817.563	1139.68
Raver1	2598.51	2477.98	2360.54	2477	2744.26	2898.11	2643.74	3218.35	2654.87	2478.01	2798.15	2465.68	2082.93	2447.7	1879.35	2219.14	1668.56	1944.99	2078.78	2190.63	1828.88	1846.51	2042.2	1354.23	1992.83	2121.41	1367.19	1844.42	2364.54	3088.87
Hspb8	22539.9	23163.7	23365.4	22238.3	23247.2	23491.4	23994	21628	28996.2	27000.3	30848.4	29664.2	31044.2	27885.9	35874.3	32984.3	46578.9	46471	42163.3	36975.9	34551.9	43754.6	36010.2	40217.7	36582.9	38960.9	38227	34804.6	36960.7	31732.9
Dld	89507	86378.6	86051.9	81335.5	88517.8	83603.1	82469.8	85367.5	88893.4	85365	96574.3	108751	76983.4	80813.3	105764	94572.3	114291	115198	134649	129474	101678	105528	87647.4	95652.4	96773.6	95695.9	117975	120825	116086	123378
Mblac1	1140.53	1035.18	1263.07	1184.98	1281.78	1085.15	1016.38	861.518	1398	1079.78	1468.06	1083.51	1173.11	910.616	1075.17	1186.39	770.768	502.279	932.971	861.138	1442.26	1382.71	1386.58	1233.6	1228.75	862.999	1094.91	1046.15	965.601	584.754
Rps8	191094	167695	210733	195668	193748	183651	219293	225429	208054	211164	219470	214824	197939	197823	144917	138061	132128	121125	125583	131431	126924	126180	124705	123187	130529	122137	137953	125709	134113	142189
Psmc6	15967.8	16250.5	17148.1	15990.7	15964.5	16377.8	17902.7	15867.2	17173.5	16569.1	18205.1	18934	15541.9	16658	13246.6	13724.3	12422.1	12144.1	14211.7	12303.6	11839.7	11320.7	11965	12602.6	14411.8	14112.1	14324	14759.4	13648.4	12209.8
Rpsa	76939.2	70468.2	74957.1	62759.1	63954	65592.2	71243.6	78249.1	74362.1	71506.7	70213.1	69162.3	65547.8	62331.5	39709.3	39956.7	41907.6	38876.7	42615.2	41429.3	40220.9	39688.3	41080.1	42841.6	39622.4	43638.1	41859.7	45427.5	46366.1	42988.8
Farp2	3614.37	3376.08	3571.73	3979.13	3806.48	4578.09	4183.42	4454.35	3789.17	4295.34	4044.79	3829.44	3396.28	4270.45	2991.44	4324.57	2989.96	2705.68	2608.31	2664.05	3050.41	3173.87	3319.68	3010.25	2988.73	3044.23	2507.05	3074.3	3109.06	3262.62
Mtmr7	5732.47	5315.62	5918.33	6097.33	6902.7	7202.25	5469.91	6005.12	5560.21	6117.9	6503.59	7005.9	5488.32	6122.35	7315.33	9372.71	9585.17	9225.28	6752.92	6748.71	6814.99	8931.22	7419.03	9507.44	6890.91	7887.73	6392.67	8249.14	7628.17	7065.77
Brox	33333.9	37908.5	35808.2	29285.2	33477.7	33274.9	32226.7	34611.5	36201.6	29551.9	36356.3	35741.8	38007.9	33788.5	37499.2	36708.1	25812	35739.2	24827.6	32173.6	32924.9	30688.7	35904.7	33014.3	35868.7	35265.3	37890.6	38289.9	32035.2	28425.9
Myh1;Myh3;Myh4;Myh7;Myh8	NA	NA	NA	NA	1778.69	1486.15	NA	NA	2785.53	2792.12	3985.28	5155.37	NA	NA	2205.4	1773.1	1998.61	2673.82	6568.53	4983.86	NA	199.657	NA	NA	1375.94	1702.76	9263.07	7635.78	3731.66	6454.16
Map6	117157	112556	110079	111380	128768	127675	104184	104099	115822	117091	103066	107328	119429	122921	164093	145909	163184	169014	141504	145181	184872	174763	174270	175932	180969	173878	151024	141788	155326	158900
Ppp1cc	7965.86	10636.3	10071.9	11184.5	7779.1	11568.4	11398.9	9971.48	10013.9	10278	9390.39	11549	10292.4	10858.9	11697.3	11496.7	10136.2	12056.9	9971.96	12385.4	11092.4	11665.4	11668.4	9462.48	14361.3	10340.8	10174.9	13256.3	10250.6	11355.3
Rps18	116755	121997	134938	109298	121089	116276	133906	126449	126561	120890	113743	115300	92279.3	109114	70943.9	67017.5	64045.2	69671.9	84931.5	75369	72574.2	68310.9	60028.3	67654.6	69052.5	69705.7	77397.3	82856.1	77630.8	81409.4
Tnc	2165.82	1917.53	1664.34	1794.07	2142.89	1846.27	5734.61	5338.61	1627.67	1903.51	1467.26	1443.56	1325.33	1445.22	3112.19	3181.33	3569.04	2956.54	2315.09	2242.79	3087.64	2908.16	2688.37	3143.68	2220.4	2915.97	3209.57	2399.38	2662.89	2667.21
Golga4	1563.8	1677.56	1607.33	1667.38	1886.09	1709.59	1732.79	1688.42	1676.57	2044.49	1681.31	1531.91	2060.18	1522.16	999.481	1337.4	1539	1883.26	1208.4	1430.23	1071.09	1277.29	1494.96	1280.21	1150.69	1017.81	1628.61	1439.4	1463.01	1498.05
Tm9sf2	15009.3	13590.1	14796.7	17199.4	15126.8	15065.9	14264.8	14752.7	10902.5	15754.5	14280.1	15998.3	13976.9	13196.1	6854.59	8125.6	7131.09	6142.08	7274.74	9248.62	5606.69	5255.5	7037.02	6810.36	5741.57	7348.68	7530.14	7393.5	6013.45	6819.84
Eif2s1	38679.1	38609.4	40249.3	41189.3	39014.4	38562.1	36331.3	37767.6	39251.4	41421.4	37573.8	38293.7	32855.3	37725.1	26641.4	27937.2	25988.7	25516.1	25652.4	26899.4	23818.3	26372.1	25001.3	27860.2	27419.2	28034.5	26064.1	28274	26936.5	27671.9
Abce1	23669.3	23748.6	24795.1	24525.4	22914.5	22670.2	23436.3	24524.3	24136.3	24532.7	23241.1	22740.9	23100.3	21386.7	21664.3	21740.9	20260.5	22252.3	21504.5	20938	17881.4	21247.2	19073.4	22007.5	22605.5	22518.3	20646.5	23945.1	21703.1	21295.4
Atp1a2	72567.6	66682.5	72286	66881.8	66632	66782.7	65874.5	66184.8	72466.2	70239.8	79308.2	81463	65349.8	62015.8	79663.3	74972.9	77958.9	78434.6	82449.9	78281.2	73106	68282.2	82457.7	78631.1	79116.4	76221.8	80148.1	73528.7	74795.6	72431.1
Atp1a1	526136	507977	587290	509315	463793	495373	529992	527640	520380	529296	578799	613470	520289	537087	713756	683852	702827	717835	629649	655957	722723	719572	742956	743171	770646	687626	620922	626900	634840	688605
Atp5f1c	96200.4	94249	111680	96384.5	106174	95917	109707	104521	112541	106890	127898	128764	88119.5	89834.7	122711	115685	136584	125730	150353	145029	111418	104499	107061	100731	110734	99473.9	145753	134149	125295	130515
Aspa	58703.4	58551.5	58843.3	55401.7	53744.5	49674.4	52386.6	49472.9	51747.2	48637.1	61881.2	57903.4	56804.5	59029.7	86794.4	84185.2	76867.4	68980.8	71810.7	70739.9	54240.8	59558.1	95866.8	85632.1	80702.2	78176.7	90446.6	77223.8	80945.1	81293.2
Ehbp1l1	2683.33	2278.82	1498.09	1909.54	2939.49	2269.22	1813.52	2697.83	2456.43	3269.7	3728.59	3151.6	2228.92	2403.97	3284.48	2617.35	2727.98	2617.87	3274.19	2558.84	2258.12	3325.25	2183.49	2493.18	2956.64	3096.9	3604.17	4910.68	3427.57	3961.52
Paip1	10185.3	8272.51	9541.51	10080.8	8073.84	10257.7	8494.13	9531.37	9117.02	9224.1	9208.74	9755.52	8283.76	9674.94	8061.39	9375.12	8961.55	8047.78	8675.3	8249.17	8184.79	9358.79	8876.78	9635.2	8188.31	10107.4	9317.41	8852.23	7256.01	8037.4
Col6a6	16627.2	16527.1	14213.2	14231.5	12584.9	13146.3	19025.3	19240.9	15655.8	17005.6	16387.5	16199.9	14109.8	12656.9	13267	12768.6	11899.5	11853.6	16870.8	16320.9	14864.7	15806.6	12034.9	13052.4	14063.6	13614.9	12674.9	13955.8	12862.3	12537.5
Nt5e	10225	10333.7	10220.1	8623.39	10819.8	10596.8	10500.5	9293.38	7874.3	8681.09	10611.2	10346.8	9640.39	9970.23	17421.9	16911.8	19876	18451.9	14986.1	16855.6	17767	17157	13870.2	13624.1	13818.9	14659.5	13575.8	13919.8	13666.6	13303.5
Mrps23	2727.07	2033.47	3958.3	4817.81	3402.47	3579.33	3612.3	3287.42	3262.57	4818.92	3790.55	3545.75	2747.91	3848.21	2734.25	3272.29	3065.83	2737.51	1848.94	3009.93	2211.45	2565.27	2268.37	1911.31	2445.66	2575.59	2628.91	3370.49	2160.79	2483.9
Rps11	38592.6	35819.9	41769.8	36809.7	37778.3	36599.1	41572.4	40589.9	37809.6	38047.1	39895	40954.7	28595.4	37044.3	24030.7	24227	23530.6	22253.1	23675.9	23700.2	21613.9	22261.6	20406.5	21567.6	22745.4	22788.2	26967.3	25733	25983.4	25860.8
Chn2	433.126	623.864	591.07	NA	695.069	612.543	745.774	792.744	719.419	854.311	747.209	854.363	768.488	1090.43	NA	721.276	509.334	921.629	649.909	834.277	496.898	1059.21	729.317	918.192	714.849	NA	615.074	608.818	NA	925.629
Gstm1	126443	125192	83214.8	88215.3	85425	87076.7	83206.8	74966.8	102917	99520	135207	137914	103330	99321	216984	216957	188561	180394	238508	254370	189885	184224	182404	173964	181635	189726	214731	207802	243768	271117
Ngfr	6072.52	6488.09	7598.46	7929.94	7395.46	6456.77	6172.74	7219.68	2707.74	6535.73	5314.89	4372.37	5816.46	5439.57	4231.76	4363.03	5879	6054.68	3742.21	3431.86	3283.35	3873.09	6260.21	4466.78	3203.91	4492.96	9057.79	4076.98	3397.26	3178.75
Col12a1	42070.7	40460.5	41801.1	40547.9	42212	43230.4	76001.3	74142.9	41658.2	42078.9	33891.4	32933.2	37531.4	36122	52951.7	52075.5	46738.6	48245	45316.9	41929.1	49983.1	49986.8	47104.7	47842.7	48092.8	44410.5	45160.3	45658.9	45820.8	45233.5
Aak1;Bmp2k	9249.07	8864.84	9676.07	6981.54	8686.23	7460.73	10343.4	9945.43	10670.1	10196	9573.1	7133.48	NA	9559.19	10333.3	9348.8	10879.9	14301.9	13467.1	10110.5	12255.5	13207.6	13447.1	8300.88	11137	12384.1	14706.7	7588.68	14615.2	12213.7
Stk24;Stk25;Stk26	8576.74	9741.95	10132.4	4847.7	11934.4	9364.24	11743.5	9908.57	10923	8060.73	9635.86	10267.4	12411.9	13139.1	8255.45	7943.01	9988.87	10068.4	9187.52	8902.16	10150.4	9521.77	10851.1	10197.1	7445.97	12277.9	8801.22	8172.44	7444.11	10359.9
Tbce	3038.67	4083.37	3422.76	4155.06	3421.54	4553.06	4151.45	4056.52	4109.72	3973.26	3938.09	5114.63	4636.26	4466.2	3891.78	4171.57	3617.62	3976.24	3971.01	3434.06	4167.15	4137.08	3923.25	3713.52	3445.53	4653.7	3414.52	4298.97	3930.46	3985.19
Rbbp4	13887.5	11893.1	11886.8	13897.8	11790.2	12822.3	11770.6	11252.3	10491.2	12179	12657.2	11860.8	9919.41	10109.5	7091.79	7774.8	7374.77	6434.25	5108.8	8663.43	7215.33	8252.07	7903.82	7881.92	6824.72	7286.8	5567.23	8962.45	5664.4	7855.05
Hspa12a	127305	123055	141733	136574	126929	123081	133676	136833	131323	129174	127413	138004	127698	122759	176699	169177	153934	157918	147024	150464	160591	160408	169075	177018	163186	155437	151046	148303	145112	163899
Alyref	29294.5	26989.4	28275.4	23584.9	22884.7	25787.8	26387.8	26986.4	29230	29856.7	24394.9	24867.1	28026.4	23726	21253.1	19889.7	16838.6	16424	15060.4	17042	18910.3	15649.7	17031.4	14035.2	20869.2	18823.9	17785.1	19388.5	18421.8	19312.1
Mars1	14875.3	15948.3	16475.5	16364.8	15048.6	16854.2	16840.4	17464.1	16119.8	17559	15078.6	16861.6	14757.9	15840.3	9620.05	10906.5	12070.3	10303.5	10344.7	10572.8	11155.6	9902.12	8297.46	9733.25	9907.91	10656	11730.4	11981.9	11014.2	11425.2
Tmsb10	7676.16	5642.85	7280.21	6363.66	5799.58	5689.08	4309.06	6259.22	5323.82	5854.72	4641.09	4759.62	NA	4038.56	2997.32	4452.3	3618.98	3978.56	2545.94	NA	1998.96	NA	7646.8	6652.25	4811.3	4426.57	4617.94	6583.61	8236.51	8197.69
Slc30a9	3955.01	3958.99	4007.1	4656.08	4150.77	4622.9	4555.18	4212.02	4336.11	5397.27	3590.69	4408.7	6112.42	4326.73	5490.68	4969.52	3446.72	5602.94	4751.22	5713.56	5130.45	4817.86	5855.24	5719.51	5162.31	6187.49	4960.82	5158.23	4812.14	6084.43
Uaca	7227.87	7296.02	7609.35	7842.03	7713.05	8409.1	7373.68	7130.5	7549.99	7898.61	7372.3	6469.01	7239.05	6996.16	5690.34	6134.48	5327.59	6016.72	5457	5372.03	5383.1	5858.25	5556.67	5588.93	5153.71	5588.19	4442.42	5743.31	5009.51	5920.12
Ube2l3	46838.9	42013.7	46195.4	47930.1	37122.1	38909.3	36968.8	39531.7	36836.1	38019.7	38384.8	40515.3	28595.7	27879.3	47710.2	49470.8	41570.9	44386.8	44563.4	47309	40081.1	40232.4	43265.4	46293.1	47188.5	45488.6	46882.3	35342.2	45928.2	48624.3
Mpdz	5784.05	7034.77	6425.89	6401.94	5731.13	6489.36	7122.83	6389.63	6260.8	5829.94	6176.7	6096.09	6114.87	5837.03	5798.2	5262.35	5149.2	5278.15	5263.8	5176.44	5408.58	5547.11	5897.22	5847.36	5790.19	6579.59	5570.57	5516.8	4608.38	5129.29
Ranbp3	9417.04	8975.03	8813.32	8825.21	8670.9	9317.49	9191.28	8927.41	9608.47	9665.08	8787.42	9025.97	8043.54	9695.62	6986.57	7014.78	6752.63	6989.9	7825.08	8097.81	7899.21	7547.52	6810.99	7844.9	7368.75	7289.09	6797.23	6742.43	9406.91	6904.36
Tfip11	1331.66	1024.03	1016.74	1406.72	1196.38	1540.85	1405.96	1699.1	1165.94	1384.12	1334.35	1100.94	910.594	1297.38	899.426	1297.18	814.462	1102.72	906.773	865.799	1089.05	1207.25	856.378	986.569	1210.02	889.615	981.051	1021.76	879.76	750.18
Rab14	40715.2	41205.5	42744.3	42388.8	37290.6	37540.2	40680.9	41028.1	41290	39166	38737.6	39179.2	39472.4	36691	41139.5	40750.1	40240.8	39710.1	40694.3	43137.3	39367.3	40141.5	38210.4	37849.8	34461.4	38147.7	39986.8	42724.3	38520.6	39140.3
Capza2	52919.5	44750	43933.2	35005.5	39331.8	38182.1	34631.2	38221.8	38753.4	41053.8	44809	45122.1	36548	35789	41809.7	45421.5	44922.4	46168.9	53976.9	48345	37854.6	40287.1	40190.5	43661.9	46596.8	40389.2	56566.9	54492.3	50871.6	55062.8
Xdh	8178.79	8413.77	5507.62	5602.69	5218.36	6452.24	6837.91	6676.06	4997.16	5622.21	10274.3	9819.42	9306.24	9098.2	11491.2	12223.2	11400	11418	14959.1	15079.8	15029.9	14376.7	9744.04	10714.2	11872.9	11192.5	13118.3	12019.7	14412	14151.5
Gtpbp4	1353.06	2058.64	1528.96	1884.93	2133.34	1674.35	1619.78	2172.05	1672.67	1830.4	1711.91	1671.25	2050.42	1758.5	1561.68	1833.1	1506.77	1553.01	1533	1762.66	1379.87	2146.66	1043.19	1493.5	1173.1	1446.88	1636.39	1666.07	1136.53	1491.64
Sort1	5642	5350.27	5624.01	5672.54	4666.03	5422.9	5964.66	5195.54	3447.64	5337.28	5321.29	5091.45	5517.64	4714.85	5636.67	5060.24	3860.29	5659.55	5250.21	5287.36	6237.73	5733.86	4545.33	5956.61	6577.14	5479.51	4857.61	5625.07	6040.47	5508.17
Cycs	87920.4	91140.6	90645.7	80432.5	81650.1	78584.4	78435.5	73604.2	92133.4	84726.1	80273.4	76233.2	59182.3	56459.9	105856	99297.9	103521	96681.8	136565	139367	93070.6	87650.5	88082.1	82970.2	77825	90248.5	101894	99054.9	113999	107734
Srl	2368.67	4862.57	2936.95	3181.68	35099.2	31071.7	9822.89	9583.4	67517.8	60799.4	119598	113713	3323.73	4180.81	64322	54152.6	74276	74390.4	215888	187987	16414.8	18259.9	2323	NA	30946.2	34745.8	163916	154860	101777	102386
Hsp90aa1;Hsp90ab1	754525	658216	714459	721155	598722	538668	585061	529539	592009	578464	564286	547614	498312	506235	540797	519817	515438	509921	579471	553636	507839	514189	541819	545633	570798	546323	554031	517779	571129	557602
Mlycd	2600.44	2638.5	2571.69	2631.05	2454.34	2937.78	2484.41	2998.28	3352.75	3153.13	3458.56	3166.06	2539	2582.2	1768.05	2307.69	2022.09	2188.07	3665.52	3209.43	1959.71	2081.29	2114.06	2495.78	1970.09	2631.09	1939.49	2392.73	2810.38	2129.89
Optn	1795.7	1640.95	1801.86	1714.54	1933.04	1936.05	1587.37	1333.17	1541.88	1549.44	1530.24	1376.39	2067.99	1841.66	1626.22	2037.38	1846.99	2162.52	2194.2	1837.02	2108.57	2225.86	1871.1	1749.28	1965.53	2196.34	2012.78	1906.9	1626.47	1979.53
Lsg1	849.27	NA	1057.85	1220.26	1313.72	1339.15	1375.76	1396.16	NA	NA	NA	1228.5	NA	787.793	NA	884.266	NA	1088.45	981.325	NA	NA	NA	NA	NA	NA	NA	NA	NA	NA	769.655
Mocs1	779.08	1352.25	885.338	1166.09	566.181	658.636	686.209	681.017	467.361	1398.12	1007.17	754.088	NA	800.547	600.042	612.458	362.001	628.339	827.982	1095.78	NA	NA	NA	504.265	NA	917.674	1283.35	738.304	1441.94	1174.66
Efhd2	13005.4	13985.9	12509.9	13593.1	12432	12574.8	11854.9	11209.8	13481.4	12713.8	12649.7	11419.4	11561.4	12766.1	15632.9	16104.8	12788.3	13723.7	13810	14198.1	14218.9	15917.3	15715.2	16112.6	15337.6	15973.2	14476.9	12715.2	14591.4	15334.3
D17h6s53e	2299.59	1304.82	1576.59	2441.26	1263.06	NA	2343.36	2040.85	1882.08	2117.21	1438.51	1843.2	1532.92	NA	2226.07	NA	2251.93	NA	1647.24	2638.91	1219	NA	578.744	2061.68	2060.87	1561.93	1316.42	1292.3	2316.03	2660.38
Rhot2	2781.56	3316.2	3870.2	3021.11	3622.47	3040.07	3591.74	2923.51	3073.95	2773.99	4230.88	2739.46	3988.84	3375.82	2181.66	2749.28	3776.04	2899.77	2651.42	3005.24	2915.1	2668.79	2674.3	2350.89	1302.24	3169.95	3384.41	2888.68	1910.42	2810.16
Sorbs2	47549.6	43139.9	20864	21784.6	19392.5	19399.8	25054.3	26403.4	17542.4	17076.1	25289.4	24952.5	24720.5	26014.7	50631.6	48790.3	34192.4	38403.5	33258.8	35319.2	35476.8	37614.8	35482.4	34222.9	28610.6	29265.1	30383.2	32293.6	90700.1	93388.8
Siglec1	2391.52	2129.22	1690.5	2124.01	1473.04	1895.57	2117.62	2245.08	1669.48	1569.06	1944.22	2220.25	1996.96	1622.23	2576.82	2352.36	2663.48	2653.39	4323.33	3568.49	4479.69	4635.73	2944.54	3131.48	2502.61	2684.2	2949.09	2911.03	3257.05	3245.25
Hgh1	1395.57	1696.81	1683.09	1638.05	1654.62	1610.44	1745.58	1398.59	1125.6	1447.46	1987.25	1678.2	1488.54	1895.79	1611.41	1125.93	1646.28	1374.63	1825.03	1018.35	1421.61	1217.79	1442.78	1480.19	1821.31	1100.15	1227.18	1519.17	1445.08	811.964
Mtus1	3289.24	2634.21	2142.33	2949.62	2172.5	2562.99	2507.67	2369.31	2559.58	2680.43	2086.66	2654.64	2825.89	2482.11	2223.84	3511.26	2103.93	3639.96	2737.59	3427.53	2617.82	2993.18	3776.93	2990.56	3037.85	3427.24	2586.87	3923.97	3392.63	1759.96
Serpinb1a;Serpinb1b	41511.3	42638.2	40703.6	28840.6	40058.9	41508.9	38853.4	39522.5	45510.5	43127	48534.2	49009	31856.2	48568.5	52615.4	51030	58409.9	55700.7	59837.2	53906.3	53254	59467.4	59761.1	63477.8	63552.8	63883.1	62119.9	53146.7	70469.1	73127.6
Poldip3	1716.87	2611.8	2181.52	2464.58	2956.45	2902.63	2775.12	2348.12	2936.33	2957.94	2412.2	2311.58	2413.91	2377.54	1855.15	2112.8	1917.84	1451.6	1648.04	1477.65	2037.79	1753.67	1962.94	1666.2	2199.29	2145.54	968.724	2104.72	1891.23	2441.67
Cdc42ep4	16576.5	17236.5	15708.8	17336.9	20426.9	16601.6	16398.2	14834.7	18806.4	18116	13444.1	14753.2	21626.3	19831.6	21334.3	22905.1	24681.5	22254	20320.5	21176.9	21343.6	24857.6	19830.1	20332.8	22794.8	22468	18964.6	19574.5	21724.8	23260
Flii	4023.15	4670.64	3628.33	4052.91	4639.87	4752.96	4009.1	4146.05	4521.36	4000.23	4946.64	5134.02	4342.57	4500.63	4238.41	4957.39	5069.32	4658.57	4183.91	4603.62	4267.73	5008.23	4601.27	4503.95	4210.64	4528.87	4604.26	4593.85	4592.25	4605.15
Matn2	24905.4	24201.3	28103.5	28916.9	27024.6	28094.5	28736.8	27205.4	25849.9	27494.2	22594.8	22967.9	21499.3	22815.3	13658.6	14216.2	16851.8	16425.6	12864.9	13016.9	15554	16510.5	15571	16112.8	13522.3	13796.6	13432.8	14021	14061.2	14143.6
Col14a1	213783	198787	204432	182753	163718	168666	218048	224094	191489	182677	167889	174399	160963	164574	82399.5	77661	56036.8	57869.2	65686.3	64071.1	70886.4	73090.4	82287	84210	69212.6	67952	59769.5	61306.8	74023.8	80595.5
Eif2b1	2599.9	3082.44	3251.54	3355.01	3699.21	3499.65	3468.34	3300.25	3323.52	3834.77	3222.45	2977.71	3125.66	3249.82	2316.65	3329.12	2923.92	1981.84	2376.45	2095.09	3249.27	1887.43	1920.98	2641.39	2292.91	2421.29	2291.46	2618.28	2383.48	2514.88
Tefm	536.361	314.955	293.584	273.485	574.169	NA	420.644	595.5	362.968	340.862	375.236	424.59	NA	489.124	207.148	NA	685.913	456.719	692.008	578.738	NA	NA	54.0491	245.526	345.85	342.894	654.632	683.052	505.195	563.488
Iars2	14530	14904.4	14843.8	13971.3	13383.1	14969.4	14266.9	13979.5	14117.6	14176.6	14145.2	14311.3	15346	14080.3	15864.2	15313.2	15148.3	14803.3	15890.7	16271.3	15800.9	15391.8	15639.6	14613	14438.5	16586.7	16756.3	15154.8	16823.6	17731.4
Nit2	15651.7	15182.4	13094.8	15189.1	14256.6	15065.4	14273.2	14485.6	14638	16924.8	15201.3	15297	14209	13333	12388.3	13275.8	9876.56	10138.2	14045.8	14937.8	10920.9	11296.1	10305.1	11665.6	12278.3	11496.9	14769.9	14927.2	14209.7	14056.5
Aplp2	3492.06	3622.23	3887.44	4015.04	3440.15	4519.43	3373.82	3821.32	4018.22	4077.29	2916.1	3729.05	2986.13	2757.48	2663.35	3753.57	3252.83	3475.58	2627.06	3344.42	4063.54	3830.62	4199.12	2931.23	3332.31	3299.43	2181.51	3020.92	3398.36	4203.93
Myh10	29256.7	26917.3	27435.6	26989.3	26270.6	26983.6	24313.2	23891.6	24995.8	25929	21974.7	22407.2	21538	21546.1	38602.9	40557.7	37306.7	37371.5	36270.3	36041.5	36125.6	36971.6	37465.2	40580.3	39992	39385.2	38670	41641.8	42920.2	43418.3
Tars1	18499.2	18673.2	16503.2	17198.8	19614.9	17675.6	17829	17825.5	19842.4	18751.6	19127.3	18467.2	18680.6	18614.1	12489.9	13143.2	12734.8	11519.8	11538.6	12289.2	12171.4	12238.8	12100.6	11751.9	13035.6	14050.1	12218.1	12407.7	14327	11899
Lap3	54569.6	52766.8	53081.4	55161.7	49976.1	46793.4	53229.5	53784.5	56532.5	49687.5	52486	51436.4	56297.5	49359.1	51205.1	50258.9	45411.9	46356.4	48565.3	46052	41370.9	44051.6	53117.7	47157.3	47217.3	42245.2	50898.3	51735.6	46049.4	48266
Wars1	78586	74748.7	75071.4	74955	78766.1	82585.6	73668.1	77449.9	76620.3	82396.2	78629.9	80484.2	79576	75115.3	87785.6	94942.6	85511.1	94847.9	80255.3	90158	85052.1	86335.6	89096.2	92819.8	87265.9	91384.3	92638.8	95033	84417.4	95607.8
Cap1	125004	127442	127647	117648	113097	114011	115465	118011	115802	107885	115085	121239	107469	111252	116367	110080	106007	108874	105216	99857.7	112316	114425	117432	112043	116056	116307	107400	108138	110908	112398
Ehd2	166561	171070	138674	125830	122098	125063	135122	148734	133919	130804	157725	170194	135426	141124	245037	225800	216224	222389	241939	228461	196778	212057	198660	209962	194840	191173	190469	189578	219013	231535
Hadha	80045.7	82929	88402.1	82436	84765	80658.3	94204.7	91671.6	97403.8	88970.1	107940	103511	76989.7	85712.9	92468.1	85688.1	113715	109448	114027	101965	95673.5	88597	82313.6	82482.8	85561	82840.6	102198	94312.4	97456.2	101019
Stk39	18455.2	17812.4	18791.6	19035	17719	19008.7	17624.4	16698.4	18406.3	19552.2	16864.4	17677.5	17618.2	19145.7	19368.3	20763.6	15521.1	17828.8	16114.4	18898.5	17982.6	16637.5	17344	18296.1	16523.3	17613.1	18141	19595.8	15422.8	15839.5
Pten	10004.9	11038.4	8286.33	9061.49	9566.51	9085.32	9307.35	9085.05	8757.13	9237.5	9614.07	8796.33	9930.95	9071.98	9685.3	8591.94	9846.14	10310.1	8509.19	8701.3	6562.1	9546.95	8966.76	10517.4	9624.89	9242.57	8383.07	7259.11	8632.22	8250.4
Kpna4	10895.3	10215.8	10990.5	9323.18	10729.4	9739.58	7127.33	7052.24	9137.45	7903.61	9310.66	7972.35	5951.24	6785.98	9198.55	7009.96	6680.28	6049.42	9476.82	7530.44	7929.44	6252.46	7510.85	7702.93	8511.13	8897.59	10264.5	7857.96	7839.67	7326.42
Hdgfl2	7774.26	8856.87	10994.9	8317.68	7822.76	7774.35	8030.1	9660.54	10952	8839.67	6944.36	9433.16	5296.93	9881.21	4475.29	5322.17	5816.91	5060.45	5371.83	5991.45	6352.46	5463.07	7823.03	3898.13	6696.39	4825.43	5505.91	6702.8	6001.53	5972.05
Pgm1	76641.1	75568.5	69742.8	62446	94778.7	90128.2	72568.6	71943.4	115699	114749	130392	129641	84041.9	90070.3	123958	116556	115566	114308	290872	272936	107097	102233	92066.4	99015	136198	129610	267307	255735	204870	201939
Tpp2	14075.4	14548	14778.2	15408.1	14811	15389.8	14755.4	16028.6	13783.8	16213.5	14555.6	15427.3	14466.8	15189.6	13446.3	13634.3	12550.6	13348.7	12176	13184.6	12279	12381.6	12205.8	12192.3	12201.8	13815.1	13643.2	12818.5	10681.8	11909.3
Ccdc90b	3943.11	4319.65	4198.26	3629.27	3777.92	3656.38	3763.9	4056.77	3520.36	3027.36	3706.13	3929.48	4191.45	3531.89	3762.01	3952.09	5127.85	4407.15	3978.67	4555.87	3243.44	3412.69	3879.07	4823.33	4218.75	4834.57	4458.2	4446	4315.04	3539.27
Isyna1	9634.58	9315.7	9470.25	7970.85	8858.9	8850.48	8226.75	8175.43	8069.06	8638.53	9708.07	10009.8	10948.9	11518.8	14844.7	16017	14529.8	14356.4	14015.1	13829.4	15402.6	14951	13207.7	15570.1	12895.8	12686	15712	12918.2	14090.5	14179
Farsa	9311.27	9306.2	9208.17	9694.44	9747.33	10208.3	9761.84	10205.6	9759.7	10367.9	10790.2	11155.8	10466	10634.3	8134.52	9504.46	8471.76	8634.46	8298.2	9530.06	7723.13	7750.77	6623.99	6923.51	7770.33	7757.5	9227.35	9393.5	9710.29	8799.56
Anpep	55815.7	58076.4	48960.2	44144.2	51155.6	49097.9	57321.9	56619.9	56160.5	52502.1	59181.1	58779	52869.7	55477	69532.1	64060.3	75985.7	72122.5	74778.8	70270.6	71771.9	75526.7	71769.6	73506.7	70934.1	70517.3	68732.5	64061.1	75291.6	78575.2
Dhh	6371.32	6394.54	7096.06	6157.76	8682.02	8228.23	8884.13	7077.53	7823.93	7476.21	5868.03	5528.5	6715.66	6928.41	5756.88	7845.13	8992.19	9260.97	7985.56	7015.77	7754.62	9683.43	8161.99	7910.82	10878.4	10289.5	8986.85	7401.05	10839.3	8682.58
Prkcb	24572.9	21934.9	26995.4	23623.6	26878.5	26335.5	25311.1	24827.2	25247.3	26838	28795.7	30586.1	26831.7	23904.5	37663.8	39635.9	42669.3	36836.2	35550.3	33944.3	34208.4	35949.2	38962.8	37790.3	35352.1	39905.1	33980.1	32701	34991.4	31803.7
Mndal	935.79	1077.33	1089.75	1099.41	720.714	1092.8	743.58	881.651	753.684	922.799	1309.81	1505.77	694.268	928.04	991.317	1526.55	884.494	742.468	1007.86	1311.93	1152.24	923.035	807.32	1128.05	1503.48	786.572	491.102	691.454	1378.73	665.835
Gtf2e1	1548.3	872.424	1419.31	1158.79	1279.93	1367.76	1207.81	1757.79	845.401	2130.42	1024.12	789.633	1538.61	1055.5	617.872	555.694	1222.83	712.717	626.889	1161.51	1223.06	559.641	335.552	486.887	265.595	237.758	802.837	1193.22	719.948	687.679
Uba2	26358.8	23611.2	24975.9	25416.8	26392.6	27460.5	21570.6	20771.2	22236.4	25699.9	24319.8	24155.8	23654.8	26831.5	15692.4	14118.9	15086.2	12189.8	16493.4	15366.8	13748.6	14607.6	16340	15947.7	15092	17210.5	16506.9	16432.5	17010.7	17716.5
Stard4	748.606	1217.81	1032.24	1231.1	1498.32	1638.84	1106.04	1195.35	1074.05	895.213	824.918	923.381	1542.89	1293.09	823.781	728.47	1054.44	1082.1	433.609	774.919	810.567	794.242	1520.68	893.609	1072.51	680.734	792.898	955.356	601.045	1076.33
Abca1	814.385	925.759	872.928	727.214	590.201	739.119	1052.35	985.084	1127.62	810.282	424.921	670.483	1031.22	683.348	668.287	989.339	692.584	960.276	764.392	1345.2	776.32	999.845	838.585	717.248	715.892	963.781	920.081	866.403	1154.9	715.967
Sgcd	42118.2	41887.2	45290	40901.5	40078.1	39586.9	46364.7	46947.2	44740	45463.4	48311.9	49906.3	51655	44577.7	67433.8	65754.9	76878.3	72364	65354	63425.6	64539.7	62316.2	70975.7	70033.5	68130.2	66705.1	69768.8	68204.5	70445.5	70393.3
Sgcg	NA	NA	NA	NA	NA	801.954	NA	NA	807.2	540.846	755.194	953.034	NA	NA	549.733	NA	961.639	1609.5	1576.43	2352.34	NA	NA	NA	NA	NA	NA	1913.47	2053.34	1122.3	1368.55
Nid2	160848	155964	158729	154597	140651	140177	152048	160341	152714	156283	160046	168345	158679	157112	205872	211358	179667	180753	178368	177229	152797	159238	196770	193750	171767	174421	170298	171573	170961	178208
Aldh1l2	3050.16	3207.16	2830.3	2770.94	2792.97	2179.02	2736.49	3221.39	2951.97	2280.23	2254.38	2375.05	2167.37	2455.74	1337.19	988.238	1331.86	1609.17	625.133	1566.7	1462.07	1237.04	1005.99	1110.94	1158.91	1166.74	986.569	741.225	1406.58	823.126
Aldh1l1	20558.3	19778.7	19807	19089.8	19511.7	18768.1	16927.5	16860	18631	17898.1	19486	20120.4	21027.2	22218.7	18058.7	16162.8	17630.5	17006.6	17753.3	18723.4	16812.7	17388.4	15436.7	14547.4	15477	16751.8	17574.3	16626.1	16173.1	15084.8
Lama5	32545.5	33402.7	27474.9	27463.7	26461.5	26959.2	26812	27365.9	22190.8	23473.1	26741	27782.6	23719.9	24588.3	69112.6	65660.7	64442.7	68324.1	60920.9	58549.7	64208.1	62978.3	59378.4	60420.1	56768.6	54498.7	51211.3	52821.9	56305.9	57136.1
Hgsnat	2714.81	2708.3	1570.37	2583.56	2978	2577.5	3040.76	2886.48	2358	2751.38	1579.6	2699.33	2702.88	2808.91	2390.68	1442.49	2607.58	2897.88	2802.31	2616.44	3542.06	3015.72	2079.25	1933.45	2169.01	2152.48	2670.42	1865.8	2144.63	2365.75
Efcc1	1732.73	2909.32	3344.42	3253.31	3024.89	3141.78	2559.32	2886.18	2530.07	3481.99	2533.55	2714.14	2291.32	2148.12	1281.1	2359.28	1108.87	1610.48	1160.85	2746.08	957.889	1387.44	2008.1	1759.81	2068.37	1504.53	950.924	1182.14	927.281	1387.69
Ilf3	15200.5	15305.2	15572.7	14823.2	16466.7	16186.7	17417.5	15881.2	16038.3	17285.7	15759.2	15450.7	17920.3	16965.5	9708.76	9395.46	9147.82	9805.48	10753.7	10745.6	10768.5	10626.4	9940.05	9934.95	9927.46	10689.3	10894.3	9739.06	9874.64	10515.3
Fa2h	8774.1	10553	12100.4	10672.2	11888.9	11479.8	11729.2	11616.2	11145.8	12380.1	9782.65	11543.2	11218.5	9950.2	3383.75	5049.41	3442.9	4271.26	3547.35	3339.72	4226.76	3871.15	4274.65	4479.93	4380.51	4700.12	4377.12	3682.32	4132.77	4442.96
Micu3	1686.98	1706.67	2237.55	2458.18	2024.51	2067.71	2081.74	2031.52	2043.85	2524.35	1827.75	2092.63	1828.75	1853.48	1605.16	2187.69	2192.75	2185.72	1860.95	1661.5	1646.62	2040.13	1689.6	2107.74	1617.64	2129.04	2138.2	1727.7	1702.14	2257.82
Naalad2	26763.9	26710.4	22223.5	21606	23088.4	23772.6	22438.8	24436.3	24652	26344.5	24410.5	23682.9	22317.1	23696.6	37044.8	34747.7	34737.8	34040.1	35416.4	37782.2	38617.6	34721.3	38800.1	40807.9	33485.7	33107.8	33065.3	34234.9	32600.7	38851.3
Ccdc93	11058.9	10625	11388.2	10608.3	11438	10926.5	11247	9537.75	10729.6	9517.92	11172	9955.39	9859.13	11327.4	7830.48	9347.66	8234.59	7697.49	11075.9	10931.2	9228.91	9521.92	8866.89	8596.91	9969.79	9574.28	9556.53	8453.42	10797	8771.52
Mboat2	4617.18	5028.96	3988.56	2823.5	3451.43	3732.62	4558.59	3985.43	3417.03	3667.63	3574.48	3121.88	3641.03	3963.33	2486.17	1953.33	1734.03	778.347	3478.21	NA	2419.01	2449.66	2781.22	2290.37	2239.58	3414.11	NA	2168.93	2476.37	2431.07
Col6a1	802851	731452	792268	682051	624733	655342	757174	741630	677149	647911	723407	741122	700224	628260	1084660	986037	977869	1002800	1011760	921765	1025960	954078	1063730	1045310	984810	900978	964547	903620	954309	1014250
Rps6ka1;Rps6ka2;Rps6ka3	13796.2	15514.6	12075.1	11361.6	13131	12511.4	13895.3	10611.5	11589.9	13828.7	15098	12992.4	13101.5	14079.2	12726.9	12506.9	12700	10026	11842.2	11539.3	12181.6	11073.6	15713.2	11519.5	15574.8	16901.6	12026	12257.1	14416.4	11576
Enpep	9677.35	11107.8	8422.14	9297.35	9017.79	9118.7	10222.7	8409.39	8578.6	9652.57	10981.5	10130.3	9870.49	9463.3	21575.6	20853.5	21761.7	20659.4	21840.4	21359.7	19837.6	19576.3	16671.1	18238.3	16143.8	16840.5	16681	17901	18578.9	16727.4
Morf4l2	NA	NA	NA	691.08	1493.84	NA	NA	825.96	NA	NA	NA	NA	NA	1349.96	NA	NA	NA	NA	NA	NA	NA	NA	NA	NA	NA	NA	NA	NA	NA	NA
Impa1	55553.8	57922.8	57399.4	55546.3	52334.6	53360	52594.7	52186.5	56069	56639	51480.5	49460.2	58570.9	55442.4	67817.8	71838.8	68046.5	66616	68936.2	70048.5	66856.1	64395.8	78173.7	70304.5	68467.4	69661.8	78725.2	73516	78050.8	74774.1
Usp47	6103.84	6843.03	6503.19	7334.67	7403.45	7268.39	6089.44	7113.55	6440.67	7012.81	7121.37	6614.92	5900.28	6301.8	4642.06	5321.29	4757.5	4268.85	5249.11	5664.68	5863.64	4817.84	4428.06	4559.13	5087.9	5337.74	4910.52	4917.44	5580.71	5249.61
Samhd1	23721.8	22335.1	19104.3	16763.7	18118.1	20147.9	21733.5	21917.9	18444.7	18018.4	25207.5	26197.9	21423.1	21548.3	24260.9	23178.3	25692.3	24141.4	27641.2	25679	28626.6	28279.1	21954.6	23103.3	24670.5	25586.6	21398.8	23775	25613.1	23016.6
Coro6	2370.42	2777.79	2188.67	2352.09	1577.73	1276.91	2889.69	1662.64	3448.57	2633.42	4867.96	2916.92	2203.84	2313.14	5155	3884.21	7087.82	5782.64	7421.37	4186.22	5454.1	3197.56	2923.62	2934.12	2869.07	3212.94	6185.28	5846.21	4739.96	5643.44
Coro1a	27103.9	26555.9	26440.7	24829.3	24944.9	23954.7	25754.5	24030.1	25681.7	24632.2	29512.1	29381.8	28465.9	29446	34173.2	33426.8	34972.8	30210.4	33290.6	32626.7	36076.3	36228.4	34943.3	37372.2	33855.1	34622.2	32373.3	34494.1	32220.8	32323.1
Polr2h	4814.36	5129.86	4633.8	4863.69	5081.9	4429.02	3993.98	3686.06	4247.57	4818.55	3529.33	4461.74	5196.24	3875.16	3346.97	3269.07	4336.03	2952.83	4413.75	4165.92	3647.95	3689.76	4165.39	4421.16	5924.79	4035.81	4412.21	4971.4	4992.92	4414.09
Map2	1954.23	2376.13	2415.45	2693.28	2400.23	2584.66	2072.27	2067.82	2476.75	2714.73	1840.22	2021.59	2182.41	2489.66	4249.11	5299.82	4775.1	4366.85	4238.29	4990.79	4734.59	4673.94	5476.21	5052.23	4953.19	5301.11	4816.34	4537.17	5236.88	5475.75
Ehd1;Ehd3	107032	102168	92407.2	82955.8	94022.1	86168.1	81892.8	89451.5	87647.5	82518.7	93672.3	81534.2	71895.7	90762.7	102696	97013.7	102312	112570	90249.1	90571.1	127565	114022	102570	100049	106539	100310	78233.8	86793.3	100442	104602
Snap25	25301.3	22881.4	29694.9	28055.3	23077.4	23957.6	27443.4	24828.1	26233.3	26164	21139.4	20045.1	24885	21875.6	24023	25343.8	24167.3	24531.5	23247.7	21441.2	24080.5	24625	26181.8	26178.2	27095.8	26653.1	24464.8	23202.6	22697.5	24532.6
Prph	982411	995746	1155640	1029290	949938	920407	1060340	1034320	1148580	1115320	1166190	1228130	892643	1015870	1585200	1491030	1624180	1512860	1484670	1384500	1529700	1473300	1515020	1603630	1714230	1586030	1479720	1369210	1484060	1576620
Tnfaip8l1	142.796	482.341	354.976	747.221	676.425	326.444	364.05	260.397	162.622	741.752	NA	282.852	400.728	191.475	NA	679.773	NA	133.782	NA	NA	NA	NA	NA	NA	NA	NA	408.354	NA	NA	540.242
Calm1;Calm2;Calm3;Calml3	1246460	1281660	1477690	1351730	873988	1059640	796748	903724	922919	990829	990214	959220	858050	744479	1139350	1142920	1015700	987538	1252360	1109040	1169420	1167910	1179020	1239080	1224050	1263260	1325580	1265300	1315730	1284570
Cdk6	2153.42	1766.34	1827.54	2307.65	1996.75	2121.09	2175.36	1942.89	1583.34	2061.83	1756.5	2097.4	2206.83	1704.46	1232.21	1354.54	675.414	1146.6	1358.39	1531.87	944.852	923.826	942.496	935.09	1108.75	1484.11	986.085	965.047	1159.64	1079.94
Ehd4	54167.4	55023.7	53237.5	51589.3	49305	51475	53139.8	55454.8	49903.9	53412	54891.5	58425.6	49981.7	54248.7	71944.2	71393.4	75626.1	79085.3	71967.8	70793.5	72421.4	75943.3	66289.5	68731.6	67846.1	65501.4	63595.9	64015.9	65201.4	67904.4
Rala	65029.1	60360.1	68010.8	57396.7	55840	56514.2	58830.6	50427.6	57904.7	57370.8	61861.6	53106	51045.4	42483.4	94798.9	96679	91814.1	88697.3	86576.4	88410	80069	81815.5	89269.5	76546.3	94921	89929	83759.5	76653.4	87408.8	83955.7
Shmt1	931.071	NA	1083.68	909.594	636.244	1193.21	786.193	750.277	1563.68	1626.8	1338.15	1132.21	886.78	856.058	NA	872.927	878.777	549.888	1338.71	998.834	NA	NA	890.483	658.256	1337.81	1644.4	2865.7	2996.38	2080.29	1127.61
Rps14	73015	66006.3	83002.1	70803.4	68941	71441.3	81554.1	75761.1	72023.9	70732.1	74920	69216.4	59524.3	70821	48996.1	44341.6	49638	50616.7	54451.6	44549.7	46114	44890	39369.9	43864.4	54124.2	48090.4	54676.1	45971.8	59683.5	43915.8
Tf	806222	752269	635242	568595	597646	605085	692635	670986	612545	581655	826518	832000	926400	846856	641736	616500	506570	483367	645184	598561	623070	605443	769003	787010	868719	783884	835218	762182	731242	803715
Ica	15361.5	16234.4	13362.3	13015.7	14125.1	13862.4	13218.2	13819.4	11614	11189.7	17813.6	16439.3	19602.2	15998.8	13050	14880.4	8569.24	9530.81	14614.1	16111.4	11765.8	11709.1	12514.9	14455.8	15532.4	17481.6	16501.9	16478.3	13829.6	14925.5
Ace	31987.2	31574.4	25585.3	24890.9	20932.1	22878.6	27626.8	26677.2	22857.7	23633.6	25397.1	26372.8	20643.3	21584.8	32240.9	34477.9	27799.9	28080.2	36100.6	35845.9	31008.7	32905.8	18862.3	19917.6	19737.3	19039.4	19279.4	18477.2	22729.5	21506.1
Dpysl4	21629.7	21602.8	22408.4	22425.8	21151.8	20079	20373.7	21877.9	21881.3	19986.3	19486	21145.8	18356.4	20425.3	15637	15307.8	13166.3	13800.1	13742.3	14272.6	13824.4	15549.4	15742.1	19092.9	16548.4	15771	14854.3	15213.8	13405.3	14129
Srgap3	2363.32	2447.69	2242.3	3329.51	2617.82	2825.35	2998.18	3044.84	2627.11	3017.17	2535.7	2315.7	2588.23	2778.59	3522.62	4045.87	3012.63	3241.46	3086.94	3147.45	3265.81	3400.42	3526.41	3172.41	3065.92	3683.18	3261.52	2836.5	3488.68	3037.47
Rock2	8826.36	9052.09	9412.9	10192.9	9367.24	10436	8098.13	9004.73	8954.04	9215.41	8493.86	10134.9	9175.24	7935.53	8962.42	10477.8	9330.3	9466.84	9332.13	10282.9	9289.4	8594.1	8531.45	10434.6	9268.15	9701.2	9223.91	9123.55	9260.53	9281.97
C5	8277.2	8781.73	6959.11	7329.6	6411.25	6849.52	6256.6	7075.74	3796.49	4490.75	5349.86	5774.93	3987.33	5531.78	8244.69	8919.05	6193.98	6015.95	8889.98	7943.29	8294.46	9109.27	4357.79	3803.12	5527.2	5360.07	4637.63	5190.47	4465.17	4543.62
Ppp1r14b	1674.37	997.976	1727.59	2346.88	2160.13	1121.55	861.294	1164.15	1364.51	2392.58	2251.4	2366.62	1593.41	893.178	2310.03	597.304	2052.69	1659.4	1696.66	1702.46	1286.93	1144.86	2125.73	1585.61	1881.94	2596.72	1075.61	1846.32	2703.87	717.527
Acot1	11106.6	13673.7	9559.42	11707.4	11146.7	8664.42	9169.4	7457.44	11987.7	12408	12770.6	10075	15969.5	10300.6	6621.7	8834.48	7368.31	8218.93	8400.22	7913.04	7673.78	8090.96	8313.4	8496.01	9020.03	10168.9	8045.83	8247.19	9255.5	6550.74
Akap13	2868.01	3428.55	3051.25	3651.55	3292.55	3066.61	3056.25	3120.85	3003.86	3297.93	3401.21	3424.69	3072.82	3372.11	2834.89	3299.79	2817.47	2836.95	3341.21	2875.49	3178.81	3457.24	2820.68	2868.15	2991.01	3114.64	2746.88	2488.16	3165.25	2752.66
Ncbp3	2619.3	3095.13	3126.77	2889.53	2829.12	3204.5	3209.54	3314.47	2648.25	3305.75	2205.19	2763.68	3601.67	3015.57	2473.03	2434.38	1654.67	2098.89	2031.59	2160.43	2171.89	1803.88	1649.39	1730.51	2417.04	1988.86	1955.22	2113.98	2089.46	2473.98
Krt6b	NA	NA	NA	NA	NA	NA	NA	NA	NA	NA	NA	NA	701.292	576.077	NA	NA	NA	NA	NA	NA	NA	NA	NA	NA	NA	NA	3138.89	3603.75	NA	NA
Krt7	1465.18	1783.75	1121.84	1892.39	1560.19	1911.92	1476.85	949.254	1483.2	1702.52	1267.1	1595.54	1038.55	1679.59	2708.59	3440.24	2715.39	2592.19	2204.84	2608.1	3008.2	2790.54	2780.42	3066.97	2490.9	2789.8	2779.89	3752.51	2963.69	3100.21
Krt6a	619.166	527.771	121.103	NA	366.815	818.237	256.833	361.905	720.931	828.348	729.53	806.679	1551.59	1583.09	574.667	1104.25	NA	NA	NA	528.345	983.464	1597.01	42853.1	39320	12652.1	13814.9	1499.1	2114.95	NA	NA
Cmtr1	3429.08	3470.09	3200.98	4028.17	2902.21	3449.39	3376.58	3863.36	3437.67	4245.42	2965.6	4029.04	4198.12	3391.97	3006.67	2831.43	2248.84	3262.23	2767.25	3424.02	2979.09	2756.06	3393.6	2815.78	3047.07	3104.42	2457.01	3895.04	3077.38	2289.93
Cep170b	3241.28	3089.39	3537.52	3408	3674.04	3624.38	3250.09	3216.53	3371.75	3420.87	2710.48	3111.31	2947.03	3512.12	3462.1	3547.49	3863.05	4574.5	3526.68	3523.53	4028.95	4409.8	4340.71	4101.55	3565.88	3984.37	3403.91	3678.03	4160.26	3507.37
Pacsin3	10348	9742.22	10854	10937.8	10371.3	10353.9	8517.36	9347.05	12798.3	11749.4	12132.5	11238	9400.65	8432.33	13389.7	13063.6	13115.4	12007.3	15734.4	16809.3	12518.5	11042.3	10503	10611.1	13270.3	11312.1	15174.1	16093.7	14762.3	12098.3
Susd2	60334.9	57460.6	53927.5	51532.9	51507.1	52237.6	52324.9	52357.8	51816.3	53136	63172.7	56314.8	59097.8	57458.1	101653	102979	108094	101762	95834.4	90780.7	95030.2	95477.4	101528	106683	111918	106432	97104.9	92471.8	100955	99465.4
Csad	25585.8	25737.2	24007.1	21234.4	21984.3	21659.6	21886.8	22466	22166.4	20283.2	22195.1	23284.6	23478	23754.2	19858.2	15396	17486.4	16944.4	17999.3	18777.9	20930	17939.2	20860	20516.2	16819.2	20651.9	18628	20195.5	22390.1	21630.2
Lnpk	10184	9951.3	10308.8	9863.44	12392.1	11111	11675	9387.06	10841.7	10717.2	11114.4	8337.99	8458.75	8890.72	10717.1	9565.27	11002.4	11218.9	10041	7939.94	9370.25	9719.95	10154.2	10302.3	9867.42	11343.6	11264.1	9911.5	11303.1	10356.1
Man1b1	3307.41	3527.16	4475.54	3952.9	4567.07	4997.68	4622.4	4184.55	4328.14	4049.32	3635.58	3376.86	3934.75	3468.38	1119.23	1305.73	1597.77	1374.27	1377.28	1576.93	2073.87	1712.9	1702.32	1236.1	1232.06	1463.41	1510.4	1721.18	1494.88	1524.49
Dcps	20042.2	19111.1	16440.4	17138	17489.2	20393.4	15467.6	17336.8	19563	18617.6	16220.6	17445	16891.5	17978.8	14370.4	15889.1	15233.4	16366.5	13555.3	16699.5	15743.1	16284.8	12118.3	16473.1	17248.3	16711.9	18103.4	16006	17257.2	18214.3
Gale	8545.19	8991.75	7917.01	7461.18	7665.46	8575.04	6558.97	8098.58	7546.33	7103.47	7253.4	7948.58	7529.52	8869.74	7764.49	8440.04	9408.75	7942.85	7863.04	8889.4	9346.81	7337.17	10733.3	10270.9	9139.48	7756.96	8788.89	9228.87	9526.55	7640.2
Nucb1	35117.5	33731.7	33131.6	32075.1	32933	32929.1	33425.4	33325.8	36525.9	34020.6	31877	31393.5	33210.3	29361.6	21597.7	18967.8	18726.9	18208.1	18380.8	18653.6	20179.4	20145.7	21241	19847.3	19057.3	20662.1	20014.1	18499.1	21880.4	20340.8
Prelp	271004	271755	267516	231529	242828	241289	267543	279826	224255	214499	240013	262215	214701	215927	610684	565254	616689	606775	593159	552030	623494	611079	538763	564932	490041	477250	462560	444533	473307	519332
Samd9l	3164.47	3587.16	3128.33	3702.24	3375.89	3793.37	3963.97	3519.37	3209.21	3450.29	3306.04	3254.41	3254.71	3639.92	2742.12	2457.64	2450.82	2585.89	2136.28	2499.22	2578.67	3246.32	2877.54	2689.87	2250.33	2728.53	2439.09	2895.76	3026.1	3095.6
Skt	2269.64	2585.64	2896.17	2827.22	2809.46	2850.93	2670.31	2906.12	2610.39	2880.98	2670.69	2868.32	3014.6	3197.18	3873.41	3850.64	3602.84	3890.58	3371.48	3759.35	3405.88	3480.81	3337.37	3398.61	3050.97	3797.88	3682.2	3567.07	3710.08	3810.6
Usp4	3866.94	4360.18	4217.79	4314.94	4161.49	3933.99	4117.62	3866.97	3754.02	3952.2	3624.24	3769.78	3862.78	3987.7	3948.19	3445.56	2930.49	3084.39	4002.56	4129.36	3437.21	3212.66	3917.78	3346.01	3228.43	4282.3	3975.97	3923.09	3747.57	3900.99
Usp15	7599.17	7907.17	8217.92	8919.6	8079.24	7987.71	7784.93	7707.76	8572.3	8616.53	8954.85	8852.63	8397.9	7654.93	7646.1	9014.1	7954.09	7725.87	7807.32	7488.88	7641	8024.85	7845.97	7829.85	8026.71	8474.65	8552.84	9442.34	8644.28	7907.34
Psmc4	23244.4	22374.8	24332.3	22437.1	22555.6	21448.6	23223.7	23487.5	24545.3	19892.4	24741.8	24899.1	22941.8	23156.3	17786.7	16974.1	17234.7	16348.5	17893	17452.7	14364.2	15659.9	17033.2	14821.5	16388.4	18687	19075.1	18295.9	17126.5	17106.1
Septin9	98222.1	95646.9	98261.6	99432.4	88811.4	85514.3	91299.5	95342.4	90705.1	91476	86649.9	90302.7	91862.4	85240.1	85500.5	86154.6	83267	84852.1	80897.2	77426.6	85764	86260.5	87503.3	88862	92169.8	81843.1	73679.3	75948.5	76868	85049.2
Septin7	137507	135761	163737	152621	137034	150791	135776	139374	147561	143225	131704	128511	129013	116336	141502	137493	109043	108600	123408	122918	109622	115565	117546	132262	131310	123264	121583	136580	125136	130690
Septin4	4226.09	4842.17	4827.74	3613.73	3954.24	4959.22	5146.67	4366.73	5116.26	4224.46	5201.84	5011.36	4103.35	4277.84	5236.5	5667.31	5614.27	4741.41	6041.83	5241.98	5845.43	5326.7	5137.33	5311.49	5548.48	5180.93	5222.52	4283.6	4791.54	5736.97
Septin3	10463.1	12342.7	12886.6	13335.1	14237.3	12972	12582.1	13292.3	13145.7	14911.7	12669.4	12447.6	13299.3	11678.5	10448.3	10492.9	11146.6	10382.5	9558.21	10339.2	11683.1	9809.04	8582.61	11572.8	9033.9	11771.1	9000.38	10310.4	9243.02	8825.02
Stxbp2	2868.83	3986.61	4097.12	3409.5	3718.5	3262.27	3919.58	3452.31	3097.68	2938.14	3291.56	3250.21	1894.32	3587.77	3003.29	2915.46	3127.14	2610.1	2471.69	2275.48	2343.25	3081.5	3155.8	3037.73	2478.46	2308.34	3122.15	2989.34	3794.84	2818.05
Erh	4056.26	4186.8	5034.15	5284.57	4028.62	4921.28	3817.73	4463.58	2838.78	5164	3962.83	5846.24	4407	4673.47	2809.51	3072.8	3188.38	3792.59	2910.55	3060.97	2899.68	2581.46	3210.27	3366.56	3437.81	2497.89	3507.13	4652.92	3169.48	2695.9
Dpp3	25808	24943.4	25834.5	24617.7	26019.2	23391	23506	22309.4	24687.2	25670.7	23307.9	23468.7	20560.5	23728.1	22299.6	22597.9	22140.7	22400.9	23209.7	23196	24256.5	22514	18889.5	25746.7	23669.5	24715.1	23616.9	23161.1	22264.1	23763.8
Nufip2	1941.51	1962.27	1443.62	2086.58	1602.65	1537.25	1889.56	1520.04	1560.43	1829.71	1483.68	1755.35	2146.95	1879.03	1133.62	1144.35	802.837	1197.08	1387.3	1419.44	1272.32	1125.86	977.517	1087.42	1243.96	1397.86	1128.01	1719.61	1347.47	1277.02
Ehmt1	382.449	335.504	161.421	478.893	272.876	505.943	NA	135.624	317.049	492.628	372.577	308.746	NA	335.646	365.212	430.065	210.544	433.718	63.2477	451.402	NA	NA	NA	NA	NA	NA	NA	248.562	NA	244.696
Fkbp10	20946.1	19629	16745.8	15772	18728.8	17135.5	19842.7	20451.1	18073.5	18115.5	17980.4	18206.6	16029.3	19364.4	5549.58	5864.67	5459.83	5414.69	6005.7	5933	6252.45	6107.08	4573.04	4934.76	6072.77	5298	5012.92	4737.04	5055.38	5882.45
Magt1	20512.4	24209.9	19091.6	25765.8	21326.6	23169	19544.1	26870.7	20855.5	24080.1	22384.8	20231.1	21071.9	21729.3	16288.2	19648.4	14720.1	16418	15522.1	17978.6	12459.9	14583.5	14558.5	16884.5	16508	14556.5	15776.9	17297.7	16551.9	18163.7
Lgals8	4041.84	3310.38	3481.99	4264.41	4223.13	3710.9	3176.71	3671.89	3930.65	3832.8	3616.39	4297.2	3465.81	4208	3778.36	3289.95	3866.44	3576.19	3901.94	5076.33	3721.1	4201.21	2703.41	3472.48	2544.65	3053.99	4029.61	3032.91	2604.13	3597.46
Des	20806.9	19606.7	17267.1	16718.7	30568.9	31040.4	19641.9	18212.4	47211.1	47899.9	78563.7	78592.9	13367.6	12536.8	60829.7	54733.5	145163	139926	158263	157241	53630.5	53451.7	13045.3	14609.1	30708.2	31431.8	108266	108648	74845.1	75215.9
Rnf7	464.367	589.231	799.494	938.327	1474.09	1100.58	1102.11	840.825	479.464	995.053	1805.47	1679.87	2642.83	1475.77	1650.94	2440.66	1060.07	885.745	1817.37	1388.03	770.779	1126.37	1091.4	978.926	898.212	549.625	845.176	2097.11	2043.72	437.186
Sun2	9381.55	8307.3	8470.42	7574.51	8326.83	8803.67	8487.61	9635.75	9005.22	8644.41	9855.62	8689.98	7241.07	7838.65	10577.3	9612.24	9937.7	10408.1	11458.6	10989.6	10118.8	9844.45	9244.92	9164.34	9559.8	9617.96	9504.8	9981.9	10476.8	10792.5
Krt84	3895.96	4255.27	1022.36	1285.55	411.454	534.112	4659.11	4229.6	NA	NA	774.545	NA	2655.51	2312.41	11783.5	12525.2	3771.37	4474.02	NA	NA	NA	NA	NA	979.921	2952.4	4763.53	1150.49	1981.4	4148.9	3915.8
Atp2b1;Atp2b2;Atp2b4	39426.3	34319.8	36330.4	31136.8	32335.8	31346.3	31527.8	29805.8	36427.8	29024	32464	30370.9	36116.9	32135.1	42347.2	38434.8	39543.8	39343.4	39100.3	37965.6	34181.6	33490.1	40603.2	37187	40061.8	38464.3	35151.1	35157.4	39772.3	36554
Gphn	7864.6	8139.01	8832.7	7778.19	7945.67	8521.56	7107.54	8186.43	8102.86	8141.89	7802.53	8052.38	8566.53	7390.53	8357.71	7758.01	6718.32	8254	8269.34	7333.8	8273.64	6997.69	7495.81	8623.74	7526.52	8678.48	8227.14	7627.02	8071.77	8385.53
Ssrp1	7120.83	6620.54	5424.33	6428.32	6446.49	7916.82	6507.91	6359.41	6764.72	6836.59	6053.91	5756.79	7398.36	7122.68	4501.4	5967.52	4949.33	5610.97	5374.29	5199.04	4798.07	4843.42	3992.98	4496.83	5495.81	4981.14	3863.68	5629.88	5452.37	5918.12
Svil	5233.79	4631.89	3936.17	4699.04	4418.19	5026.54	3996.45	4509.29	4935.98	4724.76	4753.9	4833.53	4945.17	4813.83	4655.14	4497.41	4612.34	4954.41	5195.57	5580.57	4582.42	5361.63	4008.14	4093.19	4345.81	4740.72	5055.47	5710.23	4688	5415.15
Serac1	NA	NA	NA	NA	201.178	532.928	491.286	359.328	NA	NA	NA	NA	647.822	295.859	645.717	645.749	526.841	NA	NA	313.502	NA	NA	NA	NA	NA	NA	NA	NA	NA	NA
Ncstn	12150	13707.8	13949.6	13321.3	13683.7	15699	15970.1	16580.2	14337.5	14810.2	13842.2	13705.1	15392.9	14601.8	10123.7	11137.6	12893.3	9817.54	10090.2	10077.1	12377.6	11435.8	11067.7	10194.9	9298.99	11941.5	11258.1	10329.2	12091.7	10361.6
Amacr	2393.88	2370.9	2203.11	2470.53	2014.05	2472.26	2235.67	2657.6	2412.58	2243.67	2161.33	2348.46	2422.17	2457.8	1714.76	2046.7	1630.89	2041.47	1737.53	1991.95	1475.08	1656.59	1541.56	1452.19	1963.97	1727.79	1733.98	1813.52	1349.46	1712.95
Bzw2	9423.54	8611.38	8738.84	8841.44	10527.5	9832.39	9759.08	8844.71	10526.8	10234	8250.54	8429.74	8503.78	8365.83	3743.69	3388.79	3930.87	4246.54	3930.94	5226.73	3652.32	3251.35	2892.34	3612.52	4531.19	3561.55	4527.79	4148.77	3789.47	4189.17
Bbs1	732.987	1034.44	608.747	794.995	572.209	1327.86	352.663	990.193	868.118	869.291	831.342	1107.38	484.874	683.999	751.984	787.292	574.82	939.011	415.571	768.088	567.376	741.067	562.226	265.867	796.539	575.707	282.953	574.273	483.853	364.589
Trim28	32489.7	31054.6	29775.8	30129	29958.4	30687.6	36763.7	32956	32608.8	35455.2	29835.1	30209.4	30085.6	27566.3	17856.3	19156.3	20564	17492.3	17824.3	20450.6	20724.4	19644	17513.8	18611.5	17885.1	18592.9	18403.2	18747.6	19802.7	20134.8
Eif2d	992.188	1069.41	976.335	1154.75	944.329	1090.66	444.432	1016.93	1373.64	1480.13	946.893	608.386	860.063	1086.01	952.43	755.718	896.253	707.296	1167.89	1245.48	847.487	1129.8	638.583	896.568	1145.64	555.959	987.997	790.524	1344.98	1061.2
Spta1;Sptan1	114302	95201.8	117786	100426	119236	106192	103553	102972	108534	120631	103231	112359	107606	112365	118237	112254	116883	92089	96850.5	107032	106060	113411	123950	99884.8	115218	114755	107989	102809	92020.8	102689
Sptan1	273129	268085	291355	268881	264299	262775	271006	263321	276161	271469	271905	279304	251582	240824	337894	322785	322964	325514	305620	305019	328758	318284	338050	334291	336761	318548	305735	296476	315343	325144
Gbp2	8629.88	9399.83	7280.82	7474.1	7138.34	8538.04	7339.89	7728.19	7031.94	6483.31	7727.26	8257.96	7924.34	9626.28	10592.6	9135.74	13087.9	12772.3	10396.5	10915.8	11418.2	11957.7	12728.6	11965	12290.5	12501.8	15521.9	13742.2	13503.2	13715.1
Hsdl2	12162.1	11259.7	12604.1	13354.3	12178.7	11908.4	12308.7	13222.4	11056.7	12088.5	11455.9	13062.4	12213.3	11118.9	9165.8	10751.2	11934.9	11235.3	10619.4	10868.6	9520.86	10614.2	9668.27	9012.66	8281.27	9501.9	8528.46	10306	8547.68	9423.51
Prkca	18367.8	17642.6	21272.2	21054.9	18175.4	17784.4	19871.6	19133.3	17268.8	18957.2	19215.4	19577	16309	17716.2	38414.4	37069.2	37493.7	38525.1	33671.6	34550.9	34834.9	32689.7	36599.3	38483.6	38321.6	34521.1	35084.6	33136.4	34933.1	34705.9
Cox4i1	138028	129032	137189	133185	128099	128667	138425	136507	154998	152109	161286	165940	102331	102636	154042	154379	199155	199510	203669	215177	151809	149578	135986	136176	160288	153914	172635	161681	166831	170737
Bet1l	1035.94	620.587	1304.36	975.811	778.523	850.851	903.3	563.68	797.013	572.471	786.437	457.215	987.972	1311.02	793.025	297.724	706.23	1356.21	NA	NA	324.152	649.704	NA	615.486	574.26	340.077	NA	NA	NA	588.037
Atp6v1a	99344.9	96869.3	109610	98988.7	91668.1	92280.5	94713.4	97653.1	97096.5	92388.3	92246.4	98239.9	94924.8	86750.6	129809	125363	118308	112171	118056	113619	122527	121902	127199	129274	130436	120697	115733	107997	119062	113834
Luc7l;Luc7l2	10753.4	10684.5	10091.7	11308.3	11685.1	13076.6	11550.4	12339.1	12412.6	11896.7	11897	10368.8	10841.4	12730.1	10825.2	10397.4	8623.69	9940.9	7749.56	10549.4	8366.8	9478.37	6093.24	7044.87	6966.15	8907.38	8603.72	9583.63	7773.71	9622.36
Limd1	2815.66	3284.88	2468.34	2407.68	2444.76	3071.67	2784.56	2675.97	2775.6	2519.92	2661.95	2382.04	2978.65	3314.28	3804.4	3845.4	3601.45	3974.08	3074.58	3240.04	3093.12	3051.5	2743.74	3223.82	3823.07	2959.39	3221.83	3246.34	3372.86	3020.93
Qsox1	13087.7	15126.5	12379.7	11384.6	13150.6	12493.6	12402.9	12137.7	8798.77	9984.24	12368.2	13764.4	13741.3	13373.6	9401.69	10770.7	9584.49	9206.01	10234.2	10609.6	13008.9	13059	9491.4	9805.19	11895.4	12358	10777.9	9746.01	10518.5	11573.2
Bbs7	463.452	440.773	557.563	NA	831.685	644.856	752.401	504.334	433.286	826.197	585.862	548.199	472.524	578.531	323.791	559.501	537.219	NA	448.712	330.76	NA	NA	535.597	396.15	353.438	598.749	575.575	NA	479.496	632.669
Adcy2	280.567	241.131	160.205	122.344	299.014	264.078	244.052	140.956	184.265	298.53	148.012	167.794	NA	99.6288	183.843	328.799	187.519	NA	NA	NA	254.883	NA	NA	273.37	54.2828	NA	NA	237.855	78.1957	325.591
Sephs2	505.609	504.607	559.787	502.156	824.504	436.417	509.601	741.322	722.42	441.611	510.462	392.133	1338.95	845.862	298.34	863.476	971.485	674.039	527.05	820.124	538.426	482.866	379.351	439.886	512.069	518.476	952.02	1010.97	936.637	562.487
Ltbp4	33798.9	28702.8	24436.5	30032.8	26111.7	29855.6	28601.2	29468.2	26404.6	29589.6	31715	34677.8	34041.9	33203.1	28856.4	36587.6	26907.3	33006.6	21918.7	25939.9	25020.4	27285.6	27995.7	29203	29345.1	27936.9	30742.3	35988.7	29870.6	33954
Ccdc8	503.149	584.86	631.115	717.682	679.455	632.799	807.97	673.307	751.065	707.143	471.318	933.172	1352.79	744.788	NA	587.023	NA	NA	279.574	341.288	307.752	773.164	1041.29	492.716	NA	NA	614.995	422.571	455.194	616.264
Jph2	NA	NA	NA	1560.55	1619.33	1916.92	1749.63	392.202	3271.75	3790.38	4542.7	5745.67	NA	819.997	3984.66	4396.58	5003.01	4610.49	12326.1	13667.6	1995.24	1670.09	NA	1488.67	2757.32	2818.22	15057.1	14299.3	9116.44	9376.38
Ano8	1109.38	1221.83	1663.52	1169.81	2130.65	1032.86	1676.57	1064.66	1751.56	1231.42	1976.07	1290.15	2256.57	1538.48	1556.55	757.928	1163.03	906.439	2177.97	1722.61	1944.22	837.532	1399.03	1698.66	1928.59	1528.53	1441.83	887.366	1521.24	900.366
Agfg2	6205.88	6613.27	5904.04	5277.8	5690.07	6277.62	6123.59	6125.74	5409.75	4990.87	5278.47	6553.9	6988.81	4970.09	4972.13	5816.58	5694.25	6096.52	3262.72	4338.37	5505.04	5480.28	5409.62	5232.02	5709.73	5719.67	5205.42	5225.83	5297.32	5212.11
Prx	1087540	1099500	1148930	974922	1011310	1094070	1127540	1191820	1121130	1128600	1106440	1207900	1185360	1204340	1976860	1874040	1987820	2166770	1904880	1790230	1962950	2096920	1914930	2040460	2003720	1920820	1958790	1862340	1858490	2118400
Pgp	59731.3	57686.6	55380.6	59633.2	61010	62955.1	62625.4	59512.2	63079.1	63205	72766.2	71116.7	66070.3	73186.4	75204.1	68210.5	70790.2	63106.9	77970.4	71305	65869.1	61289	59241.3	71587.7	62928.9	68683.7	80434.9	73018.9	63722.5	65133.9
Krt71;Krt76	NA	NA	NA	NA	NA	NA	NA	NA	NA	NA	NA	NA	NA	NA	NA	NA	NA	NA	NA	NA	NA	NA	2467.07	4476	275.863	773.501	NA	NA	NA	NA
Gga3	1659.45	2046.94	1796.18	1990.8	2157.19	2904.92	1441.72	1841.42	1780.49	2064.12	1799.16	1786.4	1752.36	2086.15	2473.8	2700.92	2739.86	2932.76	2350.01	2473.46	2535.24	3086.97	2022.71	2482.59	2712.67	2295.88	2408.31	2414.16	1995.59	2440.32
Homer3	2680.65	2345.8	2158.71	2908.94	2547.37	2620.27	1851.16	2994.67	1816.42	2297.94	1958.96	2988.8	2501.12	2229.85	1829.88	3197.42	2289.98	2683.57	2000.57	2736.92	2060.23	2202.02	1487.07	2133.96	2083.11	2519.58	2499.15	2318.88	2076.28	2301.57
Asl	22911.8	23752.6	22130.6	22513.2	22089.4	21644.4	22075.4	21149.5	23675	23685.8	23014.5	23397	24369.7	22604	27846.3	24936.5	25732.2	24778.7	23872	23422.7	24498	22870.5	26161.2	26096.6	23500.1	25355.8	25034.4	25333.1	25975.8	25774.6
Krt6a;Krt6b;Krt75;Krt79	NA	NA	NA	NA	NA	NA	1179.3	957.009	NA	NA	NA	NA	NA	1692.8	NA	NA	NA	NA	NA	NA	NA	NA	17382.9	20585.5	5571.79	3779.4	2432.38	1627.66	NA	935.819
Krt81;Krt85;Krt86;Krt87	388015	382845	147081	140056	56043.4	51571.8	536027	512592	62379.5	57802.9	58897.8	52868	139077	180638	335690	292214	31760.4	28351.2	11291.3	11521.4	81910.2	80041.8	93463.2	128747	351725	319386	201039	174732	402969	400212
Krt1	108066	13594.1	12507.9	12646.7	20371	11857.3	33993.5	14749.8	50313.6	42764.4	23500.4	16949.4	82662.8	13076.6	22997.9	16743.8	26559.6	20833.2	11117.3	14046.4	43659.7	23781.8	51363.7	17413.9	84109.4	21074.8	23746.1	20776.4	23979	14858.7
Papss2	9810.63	10486.5	9196.01	10427.9	10986.3	11951	10609.9	9803.75	10500.2	10253.7	10442.5	9728.61	9692.02	9757.32	7534.74	6907.27	7550.39	6363.91	6433.04	6794.76	7226.54	5794.73	6592.05	6312.24	6444.22	6802.38	6208.68	5977.14	6326.15	6575.42
Rps10	21292.1	22426.8	24797.1	21353.6	23023.1	19439.7	23889	24206	27105.3	23314.1	22000.1	21341.4	18702.1	19269.9	14932.9	12385.4	13524.8	11274.1	13401.1	13235.2	11701.7	10697.9	14187.1	12936.8	12650	12058.8	12948.4	10782.2	15366.3	13514
Pdxk	32713.8	34136.2	32313.9	27628	27124.3	29878.7	26087.4	24975.2	28382.1	26434.3	30260.4	26480.3	33004.7	27134	43188.2	41032.1	41024.1	37747.9	46060.3	41247.2	35503.9	39952.9	45936.9	42341.6	42841.2	40840.5	43659.4	43364.1	43261.5	48145.5
Wbp2	43860.2	41547	41801.6	38903	39510	39822.3	41828.8	39361.6	44337.5	42693.7	40861.4	40244.6	42285.3	43310.5	55420	55151.9	51324.1	55654.9	52117.9	50129.5	54057.9	55324.4	61329.7	57646.2	60456.1	54598.2	54649.4	54125.5	58457.8	53866.6
Tbc1d15	9794.27	10145.2	8998.61	10446.2	10636.4	10795.2	9072.89	10527.3	9433.98	10037.1	9577.81	9493.73	9975.55	9773.26	8220.48	8697.14	7074.96	7556.33	7848.45	8183.92	8590.01	8143.16	8194.62	8113.75	6870.09	8090.93	7116.7	9249.72	8542.03	7462.71
Armc1	5881.13	7202.51	6642.83	7184.04	4730.78	5977.13	5628.87	6689.3	6044.76	6199.54	7681.76	6103.72	3902.34	4398.05	5962.58	5110.95	3444.18	4283.4	4467.46	4249.75	5116.75	4552.41	5910.35	5865.45	4747.13	5010.44	5305.65	4987.68	4126.34	5010.75
Anapc5	2511.09	3303.25	3899.71	3169.06	3470.51	3749.29	3598.6	3262.94	2570.86	3608.89	2803.44	3301.72	2776.63	3004.61	2130.67	1441.08	2353.35	2009.91	1824.86	1469.02	1580.72	1366.42	1711.01	1661.57	2002.3	2232.96	2338.39	1507.57	2493.02	2790.83
Washc2	4415.87	4570.06	4763.03	4030	3940.04	3853.98	4641.37	4011.28	4626.11	3932.04	4110.58	4227.18	5017.47	3688.37	3520.24	3747.61	4365.56	4615.92	3273.78	3626.59	3944	3589.74	4150.49	3693.66	4806.07	3604.27	3434.95	3987.75	3649.93	3976.9
Capn7	1747.54	2163.16	1735.94	2066.05	1985.27	2178.65	1906.76	2019.02	2292.51	1932.25	1974.36	2039.92	1977.39	2148.25	2270.06	2010.88	2204.55	1940.54	1837.74	1657.44	2286.6	1936.37	1827.33	2283.89	2013.79	1820.13	2352.48	2192.42	1916.2	1637.69
Spats2	NA	367.397	625.917	593.575	NA	682.999	783.485	409.403	641.7	388.737	672.512	NA	546.141	572.12	NA	494.807	NA	NA	NA	426.81	NA	NA	NA	NA	NA	286.924	NA	581.872	NA	271.851
Trio	4627.29	4364.98	5580.32	5811.04	5416.5	5559.24	5005.31	5438.27	5253.45	4654.55	4665.26	5166.92	6797.22	5423.38	4302.6	4839.28	5704.77	5226.1	5155.45	4954.87	4952.47	5816.44	4500.49	4556.55	5622.25	5640.12	4978.23	3349.3	5949	4093.07
Mcat	1364.89	833.905	961.799	980.549	1163.18	960.919	1072.57	971.331	1162.4	1307.26	662.39	1196.6	871.847	875.94	659.451	845.683	1042.32	1137.29	860.518	1115.57	843.176	1051.87	1242.39	821.328	1044.47	844.828	706.785	989.792	1281.65	1303.89
Nudcd3	6134.1	6397.51	5874.91	6333.24	6343.87	5991.04	4183.12	5578.3	5410.84	6249.85	5186.13	4616.81	5271.01	5199.17	4592.32	4278.64	4571.19	5873.27	4000.58	5720.52	4889.41	5184.69	4401.53	4388.1	5256.14	5199.98	4304.15	5886.93	4153.93	4491.54
Got2	129964	122689	128976	118025	129891	127137	123793	118625	137458	136187	145496	147475	120786	133069	178316	155172	185751	186529	203766	198399	170695	161673	145124	156022	156446	151605	200218	190265	170039	180132
Tars2	2805.79	2340.64	2811.46	2632.67	2482.01	2565.96	2644.84	2910.28	2490.89	2710.23	3109.14	2518.04	2304.14	2486.04	2499.73	2730.82	2681.99	2611.78	2662.23	2415.06	2673.83	2440.32	2373.52	1894.39	2468.1	2867.2	2402.53	3209.15	2244.06	2811.74
Usp8	5850.06	6242.96	5712.22	5549.9	6203.96	5571.65	5062.6	5268.12	5451.22	5467.23	6771.18	5530.83	6071.58	5943.71	5785.55	6020.97	6400.84	6281.02	5480.75	5160.34	6362.55	6728.86	7143.6	6706.02	5798.48	6440.43	6497.15	5439.52	6431.13	6011.22
Rnf126	3183.59	3506.53	3917.81	3503.99	4731.94	4456.58	3603.02	3427.96	2817.08	3787.57	4234.55	3344.42	3480.46	4205.77	4650.78	2571.45	1875.75	2313.51	2552.39	2731.84	2092.63	3757.4	3439.88	2689.62	2719.23	3729.79	1874.68	3638.45	1989.96	2906.81
Chmp2a	29706	30881.9	32025.5	30164	32005.4	33851.9	28937.1	32085.3	28681.3	34595.9	30196.8	31512.4	15648.9	30525.3	29234.9	28790.5	30756.6	30947.5	28660	31160.3	31013.9	33430.7	24662.7	29620.8	31309.7	30793.7	31595	30927.1	30589.9	30715.6
C8g	6503.64	7418.4	6891.92	5664.74	5846.2	5758.67	5020.46	5663.12	1461.33	1609.01	2177.61	2272.08	2404.23	1853.18	6652.62	7191.1	5138.86	6439.37	10441	8957.31	6673.74	8377.8	1467.02	1252.29	1112.69	1488.72	1026.16	1414.15	1432.22	864.416
Lacc1	486.728	331.046	926.352	421.693	567.623	963.025	746.525	826.352	813.524	1004.14	532.407	550.873	NA	1372.26	623.756	412.548	NA	NA	172.419	NA	289.049	720.287	427.039	284.316	270.029	321.394	566.69	1040.07	NA	634.978
Vdac2	216152	191876	228433	197454	210106	205313	229395	214224	216802	210352	235518	246358	242546	224333	167461	167057	174342	175565	178145	178917	166412	148161	171578	171382	181800	165152	190923	186032	170699	173354
Nid1	388067	342444	380070	342121	342295	329024	361138	365962	362868	345634	385855	397637	344865	343045	453999	427456	426074	434699	410859	380693	419843	400440	443229	439277	442744	407653	403033	390354	395464	417265
Me1	41860.9	40955.9	27876.5	26856.4	29687.4	28190.3	27055.7	25177.1	31002.3	28875.4	42791.5	38433.3	47024.1	46278	44644.3	41489.8	36612.9	34671.3	41300.8	40802.5	38307.8	42048	46443.7	48694.5	44525.8	44643.7	55349.2	50066.2	55215.7	49897.1
Rbm4b	1157.26	768.211	672.859	1134.46	1270.67	809.984	1523.98	989.588	747.091	584.782	1154.22	762.885	1167.67	537.263	1464.36	938.687	678.54	1282.95	524.664	791.987	838.074	1056.16	1057.28	1045	354.819	878.918	1039.82	1216.22	540.532	311.716
Myh1;Myh3;Myh4;Myh8	27812.5	32068.4	37265.2	39124.5	544403	547964	142645	157401	943907	946442	1221820	1287220	38324.2	32448.3	866895	853145	770017	834789	2455040	2489820	185360	174906	2911.13	6133.03	551414	521406	2995440	2968700	1657810	1758170
Cp	142063	128664	113736	114582	106418	107722	120712	115075	108173	107211	133936	131846	110815	108161	129848	126645	124924	120711	133599	126838	124183	126438	151697	146298	169888	154322	150174	151115	161923	161676
Luzp1	6572.63	6411.49	6327.96	7190.92	7005.01	6579.24	6544.67	6389.74	5725.82	7052.46	5796.88	6169.25	6472.97	5516.55	7453.48	7663.17	7680.21	6794.08	6149.79	6554.39	6717.59	7102.32	6406.21	7908.07	6340.83	7373.18	6895.56	6702.82	6476.35	6831.81
Marcks	12408.7	5332.97	6416.24	4098.36	5464.28	6122	30801.2	7634.57	12710.5	10405.3	7630.97	12304.6	NA	2700.06	3399.73	6755.05	2111.44	7922.13	8225.36	3514.75	13782.5	4909.98	18666.9	2326.42	6997.81	10145.4	8622.47	6294.7	9468.22	1574.87
Tbca	25012.1	25648.5	30419.9	25468.8	25233.3	24907.1	23334.9	25649.8	26257.5	23976.8	22416.3	21003.1	24278.6	25592.4	34338.6	44085.9	39832.4	39445	36957	37117.7	40834.9	42822.9	34700.2	46000	35204.7	44352.6	34690.6	42620.4	41224.3	36697.6
Anxa2	911001	863908	923908	869112	836039	830496	855976	855910	831300	854417	876747	931843	655428	723947	1041810	994343	973280	987881	1000310	1004550	945329	922421	920805	1001910	893196	899076	963283	984743	918278	1030260
Cox6b1	14855.2	15084.1	12218.2	12323.2	11738.7	12534.7	13699.3	14311.2	15857.7	15484.1	24298.8	23951.8	17487.2	13790.7	21477.9	26288.9	26607.2	28629.8	27273.2	28376.7	21360.8	19649.8	17963.7	16092.9	21695.8	22141.3	25337.9	26036.4	23713	20544.4
Rps2	110523	105291	112847	103145	112372	103936	120666	120668	122831	105874	112866	113974	101895	100236	74319.8	69355.5	74652.9	73828.9	78953.5	64429.2	68603.5	72290.8	62253.4	69335.4	74707.1	69382	74436.8	64684.1	84309.6	74237.1
Ado	28535.6	25254.5	28348.2	27985.1	29368.6	26408.6	26968.1	26934.6	29924.6	32510.8	25692.4	26350.4	31175.6	26285.1	19109.7	24635.9	20023.3	19618.8	19188.4	23494	19477	21320	21717.3	21666.5	19912.1	20217.6	21175.5	23862	20925.9	20546.5
Esyt1	35911.1	38240	35692.8	33719.8	33738.2	34230.8	36087.8	36004.9	31766.7	33768.1	33708.4	36298.5	31927.5	32629.1	38528.6	39981.4	35938.6	40374.1	39932.4	39007.4	39201.8	41566.6	36235.9	39433.3	37255.7	37608.1	34425.1	35193	36993	37041.6
Dysf	6726.62	6917.91	6570.44	6460.93	6975.22	7195.95	7099.44	7835.4	7843.65	7412.34	7700.04	8709.02	6663.53	6611.86	10372.3	10110.9	10917	10868.5	11805.6	11968.1	9295.8	9136.43	7739.68	8732.73	9184.58	9772.48	10088.1	10494.9	9071.87	9583.63
Plxna3	498.256	502.205	563.268	533.192	636.573	651.891	494.765	806.315	603.348	641.599	580.372	598.88	588.072	586.304	567.022	730.61	723.576	809.183	144.5	335.937	431.658	681.97	295.63	277.29	701	714.007	366.173	698.533	626.069	NA
Pcna	13429.9	13436.2	13346.2	10183.1	11926.5	10168.7	11961.6	11970.7	11144.2	11219.9	12824.3	12047.3	11895.4	13859.6	7542.06	8022.5	6977.23	7569.05	6860.59	7974.94	9063.48	7940.16	8296	7544.68	8796.44	8020.61	7582.79	8753.82	7845.05	9565.43
Kank3	2636.26	3038.62	1872.42	2192	1652.98	1762.81	2802.14	2953.71	2683.18	2281.51	2846.02	2434.44	2574.25	2456.41	3171.2	3002.22	2370.53	3162.46	1133.44	2545.06	2942.49	3154.33	1493.49	2411.01	2045.17	2765.19	2041.25	2237.08	3377.31	2446.45
Akap12	122313	128489	127248	125200	116102	117469	100330	104111	113305	120114	104132	107698	108230	105920	93999.8	94199.8	95537.3	90477.8	87421.5	85705.7	98512.3	97256	99001.4	96454.9	98285.4	97466.4	102177	98556.9	97500.5	98766.2
Hook3	8125.24	8514.06	7877.34	8711.64	8727.48	8672.35	8348.6	8927.16	8089.04	8699.68	7442.47	8662.87	9321.35	8364.66	7450.18	8431.34	7174.63	7679.64	7558.26	7698.56	8057.64	7244.08	6732.61	7336.73	7171.54	7700.86	6836.5	7421.72	7341.39	7247.74
Ankle2	2072.05	2006.71	1857.35	2172.35	1985.78	1985.09	1865.74	1783.72	1872.85	1858.64	1687.57	1597.1	1672.73	2056.64	1613.07	1786.57	2033.02	1620.96	1626.03	1593.28	1174.25	1528.99	1816.84	1124.36	1282.44	1751.43	1452.77	1638.64	1347.28	1510.6
Hp1bp3	49062.9	56455.8	60048.4	50828.7	53840.4	53404.8	57706.4	59009.9	63137.4	57339.8	57815	59471.6	46006.4	59072.6	49586.4	49274	52972.2	51953.2	52198.1	46662.7	53889.1	52650.6	44137.4	52196.4	50848.2	51421.4	50175.5	48873.8	52789.6	57739.3
Hsph1	32453.2	30357.2	32300.6	30526.5	26510	29411.3	30063.7	28550.7	29341.5	29138.2	30274.4	33393.9	28387.5	29529.9	42010.1	39665.7	45994.2	45670.4	39253.4	37572.7	41115.7	39786.6	39119.1	40344	38913.5	37595.9	37924	40274.6	34576.5	36605.8
Chid1	1757.78	1996.47	1921.05	2629.17	2553.67	2473.92	1960.73	1581.75	2238.84	2403.6	2230.21	2090.42	1964.35	2207.75	1476.11	2133.96	736.191	1423.79	1449.34	1425.79	1161.79	1671.44	1429.73	1612.16	1269.72	1408.47	1074.55	2113.22	1997.89	1288.41
Strn3	11638.4	12609.5	13098.8	12915.8	12539.7	13254.8	14422.5	14294.1	12978.6	14391.6	12548.3	11370.6	9144.44	12023.2	9754.7	10812.1	10612.2	11322.1	8536.86	9075.4	8460.2	11383.5	9473.85	11361.1	10334.4	10824.5	8818.24	9998.29	9650.73	9718.41
Mtmr3	944.94	1286.65	1215.48	1039.38	1183.28	952.442	885.287	1094.22	1012.69	1197.15	1199.95	983.324	1258.79	1211.67	1065.59	1069.95	1054.32	1057.07	1082.43	1091.89	1079.31	946.762	1252.79	666.908	906.899	1241.48	1149.57	706.15	751.752	1181.4
Cd109	3214.89	3427.6	2344.45	2630.99	3061.53	3938.63	2688.49	2888.99	3360.13	3140.97	2805.84	2735.27	3562.57	3612.92	3531.64	3729.51	4804.09	4301.17	3034.73	3347.72	4925.35	4739.56	3755.64	3522.07	3030.82	3416.14	3326.29	3336.43	3667.29	3566.93
Epb41l3	161729	156718	180570	159373	149392	158609	153709	157395	163245	152893	154013	166034	141381	156228	242643	237091	234669	229549	227260	208237	234825	239441	238932	255372	254175	245616	224272	214227	218566	227982
Canx	106060	99402.6	102724	99082.9	101105	98157.4	97061.5	101431	97094.3	103592	99042.3	93743.6	86853.3	86419.5	63709.3	66993.7	62761	67157.3	64662.7	62441.1	71565.7	65722.3	74432.7	71312.3	70214.1	73949.2	62415.1	60858.8	66197	64593.8
Pald1	6579.12	6360.06	6849.48	6488.89	7459.88	8033.41	6729.89	6734.89	7291.61	6539.11	7190.5	6522.02	7361.08	7548.12	6740.8	7459.03	6412.1	7152.03	6890.59	7434.57	6334.87	6454.48	7003.21	6789.52	6592.84	7123.33	6869.11	6126.07	6135.7	6454.82
Fbln2	17418.7	16036.8	14729.8	15403.1	13198.5	16388.6	15859.3	15569.2	13488.7	14552.9	16958.4	17799.9	16513.1	15754.7	18777	23134	19004.7	17338.2	21757.6	25053.2	20405.3	20193	12101.5	13420.9	14912.8	15900.9	15368.7	17419.8	15511	19282.4
Dbnl	32770.2	29806.2	30870.2	32302.5	26454.8	27394.3	24878.7	26411.8	29183.8	28001.8	27537.1	29811.9	26890.2	26902.2	26624.3	29358.8	24129.4	24421.5	23365.4	25398.6	24228.4	24477.2	29210.3	29283.8	29090.9	26572.7	28799.6	27540.2	27334.6	28412.8
Lmod1	2805.55	5644.45	2939.23	1633	NA	2153.28	2572.31	2106.86	1697.38	1656.68	2741.39	1727.88	2673.55	1573.33	4883.64	5683.85	2660.92	3309.16	4345.8	2235.31	2554.44	2104.07	2184.34	2144.38	2984.69	1857.49	2299.04	2531.79	6535.65	6708.2
Atp6v1e1;Atp6v1e2	15447.8	14424.8	17275.6	13033.6	14229.2	17161.2	16208.8	16395.8	14019.7	16676.9	13259.2	18365.3	6258.29	14394.1	18695.2	20777.4	17603.1	21182.2	16646.4	18918	20092.1	20597.2	14907.6	13585.7	20168.4	18607.5	19719.5	19014.2	15324.9	19814.8
Nefm	1175060	1172680	1407560	1348200	1106640	1030580	1095900	1125400	1258450	1224990	1129080	1128390	1094030	956526	2023990	1901760	1869860	1822360	1840130	1741760	1897360	1957810	1708370	1731110	1993090	1730160	1820610	1700590	1835890	1813370
Filip1	3191.36	2857.84	2631.83	3191.15	3651.64	3970.05	3103.85	2956.38	3638.9	3369.69	3426.87	2819.19	2694.48	3016.52	1935.61	2148.92	2313.73	2174.67	2034.14	1627.27	1991.7	1665.17	2061.24	1952.31	2119.04	2295.56	2273.4	1924.76	2177.78	2563.62
Arhgap29	927.988	1132.83	1003.6	1102.24	1249.04	992.783	1556.7	1074.08	1157.12	1226.3	928.734	1139.87	877	1203.87	1678.83	1035.73	478.701	758.792	1256.1	1204.82	944.151	1446.11	560.055	1135.52	815.023	1322	697.971	1115.46	873.254	1099.07
Arhgap45	1291.11	1236.67	994.788	984.522	1017.41	1006.42	1623.06	1102.27	646.294	799.559	723.14	828.546	NA	956.473	783.64	797.776	800.503	808.11	1235.27	NA	1357.02	1370.69	715.37	813.51	772.728	893.669	1388.56	970.869	1009.86	902.289
Impact	7905.84	7908.81	7961.62	7988.58	8108.03	6838.45	8037.89	6873.46	7140.71	7962.7	7888.61	7025.58	10649.3	8875.83	10668.5	11441.1	10942	10165.5	9693.88	10636.6	11453.8	10462.2	9198.03	12747	10867.7	11054	9907.84	10443.4	9947.71	10349
Dhdh	23159.7	23355.8	21333.1	24021.2	21184.5	18466.3	23308	21996.4	21813	22488.9	23213	24304.5	21090.1	19730.3	29522.5	29998.1	23763	25149.7	31932.8	31686.8	27028.8	24148.6	31121.7	33159.7	28153.4	31715.6	34595	30436.8	35201.5	34011.9
Rab30	1889.67	1466.01	1992.48	1226.99	1990.59	2433.28	276.894	2031.88	1749.42	3431.95	1509.96	1199.7	2376.49	2829.57	362.904	1153.85	1593.39	1090.06	1193.21	1722.55	1667.17	1189.32	1283.56	888.699	1273.62	1606.88	1127.79	1386.72	1411.1	1189.88
Rps12	46245.3	43140.2	39159.7	40858.3	41504.7	46583.1	51545.9	41396.3	35321.7	44980.2	50237.6	51821	67392.9	64233.7	37499.4	34046.3	38850.8	37391.5	31709.6	33622	35661.4	35052.9	36479.9	33999.8	31617	29864	42533.2	34228.8	33653.8	35213
Sfr1	1709.96	2283.14	1565.97	1604.54	1691.56	1701.14	1701.6	1562.13	1718.31	1720.66	1615.96	979.691	NA	2549.92	1506.04	NA	1378.98	NA	NA	1040.58	NA	1687.84	NA	587.078	1041.73	NA	1132.46	1934.84	1843.51	NA
Lrpap1	13913.9	15693	14802.9	14598.6	14141.2	14626.9	14169.5	12954.2	16115.7	12803.8	13681.2	13209.8	11389.4	11563.5	12742	12398.6	11639.9	10413	12773.4	12394.5	9950	10613.7	11809.5	9050.93	9050.51	9986.47	9889.99	10805.3	10649.2	9722.94
Rpl11	41457.1	41366.5	39192.6	42029.3	41848.4	38067.5	43389	41592	44161.1	42508.9	45919.9	44777.9	42587.8	41763.8	22675.4	23042.3	26904	24751.8	24698.9	24588.1	24794.3	27199.3	22585.2	21818.2	25335.8	25197.5	25684.7	24642.7	26755.9	27267.3
Rhot1	6376.8	7194.92	6923.4	6814.11	6784.03	6431.22	6775.93	7417.69	6645.74	6208.06	6914.3	7075.77	8003.79	7368.26	4518.65	5746.36	5904.04	6576.73	6094.07	5472.57	4897.82	5259.15	4699.26	5112.55	5327.75	5051.84	5333.11	5554.11	5370.13	5539.29
Aars1	42097.3	40775.9	43756.7	38319.1	39755.5	39008.9	39741.5	37005.9	42045.9	40092.8	38667.3	37806.3	37718.7	40289.2	47577.9	43314.4	45921.9	43760.3	44181.2	45379.4	44178.8	46198.2	44656.8	47173.8	45136	45838	45510.7	41995.3	44893.7	44703.8
Ubtf	5915.99	6579.84	5351.81	6417.23	5104.79	6250.54	6333.85	5840.26	6028.95	6864.36	5942.24	5579.15	6714.34	4996.25	4248.76	5377.08	3835.4	4109.88	4759.62	4066.59	3708.04	4468.94	3372.51	4201.28	4189	3685.09	4212.21	4030.85	4132.09	4706.83
Tbl2	8572.19	10191.3	10433.9	10335.7	10292.4	10613.2	10600	11456.6	10198.4	10398.2	10717.5	9194.33	8838.32	10042.8	3912.77	4845.4	4334.67	4503.84	4920.31	4499.21	4539.76	4694.04	4628.38	4044.08	3255.89	4668.89	4169.48	4979.8	4980.59	4278.29
Stxbp6	58450.8	50073.1	51901.2	55880.9	45236	41742.2	55728.3	52820.2	44216.5	52712.3	54563.1	53438.5	54520.7	48224.7	102423	97936.7	104184	108834	92341.8	94340.7	103064	105785	109872	103936	102533	84055.5	93968.1	89748.7	100370	105705
Setd3	3663.7	3816.92	4241.72	3970.3	5136.15	4391.55	4133.69	4536.32	3987.37	4074.16	4126.05	4157.68	3529.96	3669	3111.04	2722.48	2639.72	2999.12	3124.08	1938.36	2378.22	2427.77	2319.73	2902.47	2584.26	3176.69	2762.48	2888.08	2229.25	2459.53
Acaa1a	42255	38658.2	40682.6	38172.3	33934	36040.5	39814	41492.1	37706.8	35959	38581.5	36689.6	40560.8	37549.2	30221.6	28560.8	28176.8	24914.9	28547.8	26592.6	25011.4	25680.7	26300.2	26792.1	24731.1	25656.4	27106.1	27284.4	25617.7	26684.2
Numa1	11220.8	11162.8	11543.8	12307.6	11556.3	12017	12478	12748	12127.8	13890.6	11334.6	11657.9	11217.3	10973.9	9968.09	10668.7	9382.72	10116.1	9383.97	9895.91	10330.3	10232.5	9740.88	9938.67	9742.05	10098	9848.2	10729.7	11083.6	9709.63
Rcn2	2715.05	2428.18	1871.45	1998.7	2422.43	3036.1	1882.86	1479.3	2030.29	2404.96	2213.05	2561.42	2375.9	1410.4	1799.39	1905.48	1652.36	871.721	1583.96	2785.21	1592.97	1560.43	1447.94	1657.37	1409.55	1774.47	2381.35	2174.26	2469.45	2518.73
Stambp	2523.35	2483.18	2282.49	2224.42	1910.57	2808.63	2403.51	2434.8	2456.92	2718.17	2575.86	2635.35	2329.89	2448.95	2879.39	3450.3	1924.17	2545.3	2996.67	2397.69	2231.8	2732.3	2464.31	2920.67	2587.43	2933.95	2347.81	2522.29	2070.74	1817.74
Dnm1l	25542.8	24503.7	27055.7	24932.7	25503.3	27445	25706.7	27575.9	25740.5	27175.3	26309.2	27923.6	28999.4	29580.7	26144.1	27277.4	26408.8	30101.3	26513.4	26352.9	28813.4	27358.2	29120.9	26345.9	26400.6	26920.5	28515.9	28691.9	26677.8	27921.4
Npl	5501.22	4887.8	4541.9	4457.66	5086.03	5454.78	4398.55	4398.3	4611.48	4484	4284.67	4798.99	5010.96	4381.84	5270.21	5217.42	4077.98	4378.02	5677.32	5638.66	6620.33	6678.23	5506.02	5984.47	4701.74	5081.52	3659.24	5098.21	5266.24	5201.35
Tgm2	52909.7	51793.9	41160.4	36007	33563.9	33003.2	39410.2	42946.1	31489.1	29297	44015.3	44482.2	43194.9	45078.6	88379.8	86184.1	74985.1	78640.3	73321.1	64429.5	69109.4	67448.7	63878.6	61379	63855.3	60239.4	64949.2	64704.1	75472.3	75113.8
Rmdn3	7007.56	6944.08	7761.33	7748.34	6356.68	7438.57	7139.01	8306.96	7303.7	7819	6643.21	6118.88	6147.03	7276.81	6137.92	6743.37	6716.86	6885.91	5721.55	6440.97	5813.7	6349.69	6069.13	6342.07	6014.29	5960.55	5629.44	6635.31	6395.45	6076.24
Rbck1	2933.93	3112.12	2709.75	2806.45	2727.3	2656.5	3243.65	2995.52	2729.18	2890.46	3286.75	2383.25	3246.07	2941.9	3181.84	2731.89	3068.24	3555.4	2788.65	3577.89	3393.22	3074.4	2595.22	3142.59	2587.05	3323.08	2700.77	3019.35	3263.28	3218.69
Thrap3	14341.1	11883.7	12999.6	15627.7	13564.6	12750.5	11962.9	11011.7	14031.4	15423.7	11843.9	10775.9	10243.7	10568.3	7206.6	7674.87	7867.15	6967.85	7799.06	10255.3	6313.37	8548.54	7728.5	6262.65	9034.55	8175.42	9503.02	8571.85	8261.46	8773.39
Dsp	1760.89	875.245	NA	577.526	NA	NA	1708.19	1125.86	2487.83	2512.05	NA	1038.76	1984.76	926.099	521.279	913.88	NA	NA	NA	NA	910.059	NA	16672.6	19943	1622.69	1661.02	2290.3	1442.7	NA	NA
Ogfod1	385.69	376.767	NA	NA	305.044	NA	NA	NA	NA	410.44	NA	NA	NA	338.942	NA	NA	NA	NA	NA	NA	NA	NA	NA	228.799	498.631	NA	NA	NA	NA	NA
Tmpo	50994	51106.2	51244.5	51622.5	42643.4	48074.2	49355.8	54412.4	54611.1	60788.1	52650.6	56851	56891.6	48948.8	48657.4	51503.5	46625.5	51033	43698.5	52714.6	45815.2	46914.1	44277.8	44362	48661	47329	46145.4	48025.7	47889.6	51388.8
Clic1	73326.5	70432.3	65100.5	62852.4	67792.7	62815.2	66218	68372.9	69136.9	67446.7	73590.9	72105	66527.9	73613.7	61689.4	68665	66931.4	70930.9	66992.9	62897.7	76487.4	74049.1	64470.4	73814.6	64551.4	65177.7	72553.5	68486.6	70201.8	76753.8
Tpm1	55670.9	49797.5	44521.7	32109.1	133981	137224	48554.7	46523.3	268362	259030	279997	280871	31935.1	27206.1	305296	291383	257764	255904	941616	896319	75586	66169.1	52054.8	44755.4	217013	201898	914820	851801	641339	697845
Plxnb2	8233.25	8218.29	8008.6	8686.74	7447.6	7798.72	7505.45	8136.84	7576.94	8352	7201.24	8040.61	7414.51	7666.74	8222.79	9384.05	8310.13	8744.16	8041.06	9107.22	7581.63	8316.53	8603.23	7710.57	8270.7	8236.22	8449.3	9778.18	8367.05	8942.85
Ces1c	268087	261309	215152	219134	222782	215227	234039	245158	266160	255941	334152	345567	299246	284824	202878	207646	127457	128360	182898	182941	168285	169917	322846	323423	405078	368379	357345	325103	351898	367120
Top1	8863.62	9065.38	10255.1	9258.33	8176.52	7713.08	8887.86	9804.77	9186.19	9297.48	7533.88	7883.61	8264.09	8967.17	4997.54	5734.75	5172.79	5995.64	5519.35	5362.21	5357.95	6340.49	3737.83	5389.06	5964.83	6015.57	5216.2	6348	5289.79	5775.77
Rmdn1	5245.36	6409.15	5985.66	4700.5	7060.21	7496.91	6491.03	6736.93	7943.04	8111.98	8446.22	7972.73	8745.03	7647.4	5854.78	5570.16	7538.17	7358.35	6952.74	6605.68	5680.91	5712.53	4881.36	5089.48	5436.99	5902.11	8083.91	8457.16	7142.71	7594.37
Klc2	27990	28499.4	28231.9	29693.5	29683.3	29055.3	28155.7	26643.3	30662.5	30802.2	28806.8	27347.2	28366.5	29545.8	31860.4	28800.4	30889.7	26608	26966.7	28912.1	29521.3	30381.9	32849.9	33146.9	32756.5	32517	30180.5	28705	31692.4	27968.7
Rarres2	1696.56	1909.25	1532.17	2060.2	2112.66	2439.95	1636.99	1738.04	1746.38	1747.14	1464.02	1709.12	1577.75	799.305	1233.44	1836.99	894.646	744.125	1259.97	1062.56	NA	1010.51	1374.58	1170.93	635.597	1078.46	1436.94	1051.37	1248.31	854.433
Nt5c3b	4056.66	4077.05	3714.46	3409.98	3635.73	3751.86	4008.27	3540.8	3559.37	3693.29	3422.99	3175.95	4367.43	4285.27	3332.27	2913.28	2974.17	3066.75	3218.3	2480.7	3770.05	2127.58	2977.87	4107.98	4021.84	4644.86	4461.7	4096.41	3561.01	4116.3
Nck1	19308.3	17828.1	17570.8	20719.9	20326.5	21650.2	20778.2	21131.4	21161.1	20764.9	19162.9	21189.3	19976.9	19528.6	21081.7	21984.1	17210.9	19221.4	19105.7	23508.6	17124.3	18686.2	17558.2	21047.1	19569.3	19099.3	18592.9	21470	19184.4	22989.5
Cc2d1b	14817.5	14237.2	15846.3	15290.7	15760.5	16586.8	15233.7	15235.8	15666.4	15927.6	14421.7	13882.5	14708	14155	13614.9	13648.2	13859.1	13108.4	12802.3	13370.5	14287.3	13885	14574	15359.1	12582.8	12884.1	13127.1	12177.1	12983.4	14340.5
Lancl3	2543.67	2434.66	2994.49	2565.58	3168.86	3390.44	2509.73	1876.87	1412.03	2341.48	2715.6	3066.71	2726.05	3273.49	3975.92	4627.33	3880.24	3771.93	4414.87	5156.8	4473.06	5225.19	3450.36	5720.34	4246.43	4397.55	3398.79	3818.81	4299.89	4693.46
Ralb	8901.56	9455.58	12053.2	9790.03	9734.23	9392.39	7016.8	6183.6	9352.02	8846.74	7022.46	6657.44	5804.3	5805.95	7551.33	8505.9	7175.79	6969.61	6931.77	9346.03	4481.72	6747.49	7959.62	5886.55	8739.15	8189.54	7487.51	4833.84	7284.09	7887.01
Arhgdia	504438	493454	416679	477519	401805	412015	411688	395947	414327	445315	422667	438112	439328	402707	473695	499796	422719	462402	486488	481868	378257	459663	463507	511536	455609	478531	528092	506120	479469	546157
Exosc8	3410.11	3818.31	3613.65	3251.62	4108.87	3211.98	4102.55	4058.61	2611.75	3761.04	3880.49	3451.65	2955.16	3924.74	3431.1	3633.34	2587.61	3736.77	3329.02	3505.13	3278.78	3481.13	2915.09	2820.13	3524.51	3700.75	2414.65	3450.66	3577.46	3298.36
Mbl2	2689.58	2848.59	3150.26	3356.99	2500.5	1961.51	4084.68	4011.14	2068.31	2695.38	3711.72	3805.57	3133.39	3246.2	2666.3	3085.3	1217.37	741.254	1503.06	1893.11	1079.75	2203.43	3131.73	2559.14	5318.72	6067.1	4513.71	4533.4	4827.42	4255.22
Enoph1	17323.2	17140.9	15376.9	16325.8	17061.4	16013.6	15460.9	13768.8	15867.2	14632.1	13481.6	13589.5	14668	15604.1	17072.5	16589.7	18443.9	15482.8	15846	13458.4	19274.7	20223.1	23694.6	18552.1	20289.6	19021.4	17828.3	17013.7	19331.2	17352.9
Rnpep	14761.5	12803.7	10486.7	10279.6	10946	11382.3	11451.4	11564.4	11580.3	11096.5	13303.8	13568.7	13557.5	13098.1	13155.2	12955.1	12867.9	14309.7	14283.4	13349.6	13597.5	12306.7	14746.2	14191	13584	13764.8	14052.4	14177.4	15495.2	14044.3
Heatr5a	1866.72	2542.61	2602.85	2764.85	2665.81	2664.31	2815.56	2183.66	2296.8	2084.49	2115.96	2551.2	3063.87	1864.82	1272.4	1513.4	1494.32	1039.47	1246.69	1512.7	1233.44	1358.07	1206.55	1013.98	1238.52	1132.96	1001.39	1599.45	1572.66	1036.73
Pllp	71243.7	76056	65361	58669.5	58397.1	56251.8	64033.6	74276.5	68065	59826.5	51818.9	61470.3	61978.7	70022.3	71364.6	61113.3	49847.9	62123	72575.5	62743.2	72169.3	67403.8	80214.5	68506.1	75620.3	75855.4	68350.3	58067.5	75598	65223.4
Clec10a	10256	10677.9	9015.45	9070.2	6534.17	5944.7	11483	11547.4	8040.07	7282.58	11045.1	11338.6	8350.56	9014.52	14845.3	14641.5	15773.9	15178.1	21711.1	19583.3	20861.8	21990.7	9724.95	10195	12054.2	11603	13581.8	12959.2	14490.9	13548.5
Fsd2	NA	NA	NA	NA	NA	NA	NA	NA	NA	NA	NA	NA	NA	NA	NA	NA	NA	NA	NA	730.658	NA	NA	NA	NA	NA	NA	234.622	608.241	NA	NA
Fip1l1	4860.98	4348.92	5215.26	5332.51	5869.49	4749.45	4528.59	5862.99	5013.31	7006.35	5330.51	5611.61	5639.38	6059.27	3760.96	5252.41	4005.14	3888.05	3022.8	4567.86	3929.92	3904.66	3989.48	4324.9	3654.68	3469.36	3250.63	3754.06	4285.81	3877.5
Flna	175973	169441	139196	124457	101719	108421	126649	127373	109825	107297	124247	129490	132160	125682	175806	167830	157468	159774	138260	133877	139926	143386	135036	136494	132329	126068	139763	136427	198024	206616
Snx4	15801.2	15638.7	15292.4	15408.8	18025.3	15890.5	15343.5	16836.6	17027.7	16771.6	14593.1	14796.7	13728.9	14119.9	8414.42	9257.55	9006.28	8750.99	8155.67	8005.03	8600.35	8791.67	10015.3	9209.61	9156.27	9583.61	9579.36	8741.14	8829.13	8674.56
Bcl2l13	6611.12	5666.16	6324.26	6251.62	6232.46	5137.88	6033.63	5548.85	5537.39	6630.12	6552.99	6255.84	5972.64	5986.25	4481.27	5658.97	5222.66	6183.35	6324.17	5509.13	5082.83	4099.83	4757.31	4030.53	5963.57	4587.51	6090.51	7186.05	6453.5	4131.97
Basp1	4962.3	5508.32	6648.4	8595.34	7105.54	8108.73	4287.9	5174.92	6629.38	8183.68	4197.79	7261.36	6507.02	7553.79	2860.59	5267.26	5664.8	4270.12	3183.01	5251.43	3638.95	4866.48	5152.38	3969.89	4194.19	4453.13	6955.93	6212.14	4796.04	4431.6
Tpm4	110581	110984	120367	113412	95383.4	99006.4	88200.6	81974.8	90303	97039.6	103934	95668.1	82694	90874.6	120087	109814	118422	118991	131338	118358	111827	124948	126131	116198	106034	112969	126936	115792	136865	129593
Hp	97244.1	95450.3	31456.9	28106.1	20198.5	18133.5	8377.39	10109.4	1732.98	3142.51	4065.67	4890.68	2009.61	3433.74	15848	15297.5	256554	243167	81935	77962	193579	173427	2983.04	2946.11	2917.36	2994.87	4388.74	4651.13	7496.85	5799.83
Atxn10	20702.7	21755.9	21164.3	20612.3	21695.3	21306.3	21217.2	20619.5	21493.9	22107.8	20625.3	21134.7	20771	21790.6	17302.1	18101.7	16209.2	17604.5	15879.5	16134.7	16958.9	18346.6	17418	19592.1	18308.4	18355.4	16094.5	18821.8	17922.4	17815.3
Als2	4055.77	4014.78	4536.02	4601.16	4957.85	5616.62	4444.76	4138.53	4465.34	4320.36	3646.21	4336.61	4368.1	4419.04	2586.36	3177	2714.93	2669.83	2527.01	2941.45	2488.21	2785.78	2374.22	2909.18	3394.88	2897.64	2376.66	3372.69	2580.31	2412.89
Acyp1	22748.5	24326.1	22269.2	23724.2	25238.1	26038.6	22944.4	24017.4	23927.7	26196.1	23128.6	26685.4	23995.4	27972.3	28799.2	32996.9	30513.6	32813.1	30083.3	31588	30502.8	32975.4	33606.7	35587.9	31327.5	32850.8	32975.3	34882.9	32022.5	33811.1
Arhgap23	2419.07	2110.63	2231.24	2947.02	2669.57	2458.71	2688.95	2207.21	2397.04	2342.45	2660.65	2259.29	2691.15	2565.33	1979	2589.47	2308.18	1816.48	2098.49	2142.03	1880.43	1743.01	2001.61	2227.94	1891.21	2768.75	1842.57	1746.08	2345.27	2312.42
Fgf1	52004.8	56928.2	55339.2	45137.4	52680.1	48132.9	55954.5	51284	54851.1	54723.1	48123	47431.6	71611.1	70725.7	91217.7	66701.9	78867.9	75731.4	76581.4	60160.8	74684.3	74003.4	102224	94421.5	87564	85537.1	95340.6	75526.3	88203.5	80704.5
Map1a	68346.1	67258.9	71513.6	72175	66831.2	70813.5	62006	61072.1	68636.6	69827.5	62515.2	63953.3	58987.1	59398.5	79284	79848.6	77138.2	78789.5	72973.3	70601.4	75161.9	77673.4	78340.2	80397.5	78326.4	79551.4	75257	75572.1	74241	73037.3
Ptpa	36787.2	42565.4	43719.3	31207	35038	36102.5	34236	33745.3	35641.5	33052.9	41409.6	37463	38239.3	37075.4	51369.5	42407.2	37862.3	38576.2	42644.4	39075.6	36540.8	35874.2	45911.8	37109	52059.5	46985.6	48083.1	36660.7	41801.4	38568.6
Srsf4	619.71	633.5	773.794	1434.38	1043.2	569.44	436.432	463.173	696.612	421.155	702.081	446.129	721.295	477.663	570.924	414.077	NA	151.021	NA	673.552	353.679	NA	NA	NA	530.42	335.505	400.932	103.18	NA	NA
Cpxm2	938.11	887.919	644.163	733.839	757.277	963.459	973.435	456.847	897.027	965.385	631.909	618.105	606.797	957.697	1916.22	1863.14	1657.45	1937.38	2713.18	1945.86	1605.63	1653.27	1976.93	1949.03	1845.7	2221.67	1916.85	2557.44	2390.21	2412.14
Papln	4000.76	3677.94	3679.71	4506.03	3344.26	3914.65	3684.39	3671.77	3705.84	3862.57	4233.52	3934.64	3945.82	3227.92	12659.3	15418.4	11544.1	12244.1	10975.9	12448.9	9633.73	10406.6	11206.9	12914.1	10107.3	10982.7	12035.3	11860	11352.2	12922.5
Rbfox2	614.94	487.248	766.843	502.651	652.011	351.762	332.899	199.216	511.458	428.08	482.691	496.964	548.599	649.277	NA	527.419	NA	NA	761.559	314.304	111.396	276.833	196.332	NA	672.482	470.301	566.16	407.469	351.151	321.571
Snx16	2752.36	3341.62	3294.69	3655.9	3763.46	3703.72	3200.03	3561.24	3407.47	2954.26	2854.02	2701.9	2962.69	2975.64	3090.29	3438.73	3394.15	2739	3328.2	2419.94	3578.63	3431.97	3056.7	3576.43	3563.12	3991.93	2933.68	2396.92	2842.97	3118.55
Ptpra	9068.01	10254.5	9350.2	10083	10178.5	10885.3	9266.08	9732.03	8525.32	10033.2	10174.3	10365	9980.12	8652.76	8952.71	11016.9	9454.74	8362.08	9108.23	9751.13	8813.49	10066.4	9670.19	9995.64	10655.1	9881.64	9845.97	10121.3	10897.1	10247
Cfb	52216	51517.3	40591.7	33939.2	39740.4	39654	39482.4	39492.4	30067.2	28726.5	36815.8	39711.9	32153	35696.6	34785.6	33446.9	26541.8	26668.2	31826	33355.1	32120.9	30165.5	31335.3	34810.9	41229.7	47045.4	38889.4	37771.4	33503.7	37259.1
Wdr81	2388.59	2768.34	2511.24	2878.32	2858.33	3297.18	2560.98	3019.75	2758.33	3036.46	2615.15	2532.96	3022.66	3377.06	2001.9	2262.66	2263.51	2283.28	2796.19	3087.35	2540.79	3145.84	2518.4	2559.38	2862.94	2137.27	2721.36	2219.27	2837.41	2291.54
Ptpre	11517.3	12613.7	12245.6	13410.2	13204.9	13904.1	12255.1	12589.4	14420.2	13922.9	12063	12909.2	12279.3	12760.4	12361.6	12315.5	11702.8	10750.7	9845.29	10070	12630.8	13191.8	12870.8	12740	12323.9	13787.3	10928.1	11235.4	10773.5	11706.4
Acad10	5513.18	5914.12	4911.09	5153.36	5073.54	5839.58	5301.37	6311.54	5443.65	6160.42	6142.28	6778.89	4468.98	5709.36	8115.12	8043.29	7224.38	9460.11	7793.25	8805.46	8114.11	6243.18	7050.29	6168.83	6907.28	6462.67	8168.32	8817.59	10144.4	8933.34
Pxdn	7883.55	8494.44	6691.94	8088.27	8531	8762.72	7886.44	8332.62	6545.35	8233.89	6344.34	6626.87	7492.41	6872.36	6196.37	7125.61	5881.04	6006.42	5449.54	6206.11	5798.55	5389.55	4130.08	4095.05	3236.43	4033.22	3619.72	4062.65	4068.02	3572.06
Ide	14548.4	14935.9	12679.6	15096.5	15285	14102.3	14407.1	14006.1	16340	15151	13834.6	14544.7	13522.5	13371.3	12332	12739.7	12444.5	11250.4	13104.6	11959.9	11736.1	11256.8	12720	12850.8	13058.8	13359.9	12933.9	11866.2	12678.7	12016
Pkp4	1188.82	1474.74	1335.37	899.229	1001.22	992.781	967.137	1094.9	1022.05	1273.54	1046.22	1285.51	1671.48	1243.08	1563.71	1677.62	928.602	1566.25	1667.86	1336.12	1555.87	1894.33	1739.15	1564.62	1517.93	1417.44	952.882	1289.78	1436.46	1613.63
Rpl13a	61960.4	55003.5	59496.6	49640	58291	54223.7	65676.2	63482.4	50899.3	55449.3	58555.6	54427.2	55079.6	57807.8	32954.7	32283.3	31512.4	32021.8	32754.6	24161.4	32828.1	31550.4	30196.6	30744.3	34622.1	31399.1	37286.7	37216.5	37761.6	34980.1
Gan	2550.17	2684.86	2553.72	2776.2	3142.14	2819.64	2368.2	2706.47	2637.37	2649.25	2613.73	2890.71	2444.72	3008.71	3170.57	3561.96	3043.76	3525.82	3205.67	3649.47	4148.45	3363.27	3120.75	3233.29	3201.53	3518.18	3393.98	3396.28	3313.66	2942.13
Abcf3	4473.82	5027.83	4894.52	5003.99	5583.96	5616.46	5203.09	6090.28	4809.01	5623.2	4635.92	5562.84	5006.32	5662.61	4036.25	4841.01	3949.73	4656.66	3812.88	4775.09	4178.03	4756.45	3988.2	4734.32	4210.07	4437.43	3988.54	4827.88	3885.82	4042.18
Igfn1	NA	NA	NA	NA	NA	NA	NA	NA	NA	NA	NA	NA	NA	NA	796.23	1274.99	1265.04	1201.5	3438.21	3805.09	NA	NA	NA	NA	NA	NA	NA	1374.65	1377.22	NA
Zc3h4	971.779	1594.58	1203.36	1271.6	1182.47	1216.83	1277.21	1282.84	1040.54	1120.98	1187.95	1063.73	1109.63	777.263	1311.72	1579.84	1346.03	NA	1113.81	1331.57	1083.75	1512.42	835.554	1105.28	1173.35	1383.23	1067.66	1478.14	1466.14	668.131
Slc30a1	746.586	1217.57	1450.32	1130.74	NA	1536.33	1868.42	1465.08	816.691	NA	1128.91	1286.89	1871.19	2091.39	1849.94	1482.23	901.293	1315.79	725.039	1139.62	1333.2	1604.26	788.012	1165.7	693.738	987.694	689.013	1142.24	934.386	1540.44
Syne1	2792.59	3006.81	3090.63	3166.45	3344.96	3257.4	3305.08	3293.56	3169.46	3394.42	3429.36	3429.88	3325.49	3139.64	3423.79	3778.39	3356.17	3260.21	3374.24	3269.46	3260.83	3333.29	3285.19	3166.74	3155.88	3469.9	3189.87	3372.29	3286.92	3495.09
Rcsd1	2975.46	3030.97	3082.37	3488.2	3229.02	4866.12	2828.6	3408.01	3883.87	4355.05	3514.4	4310.09	4047.04	3994.16	3194.06	3401.1	2943.56	3392.91	4033.99	5608.72	3193.39	3301.08	2797.31	3230.23	3792.45	3685.72	4631.84	5266.78	3522.11	3055.36
Ap3d1	10264.3	12017.2	11967.4	11180.3	11168	12697.2	11334.7	12102.7	10351.9	10604.2	11245	10872	11027.6	11079.6	9976.37	10555.4	9490.74	10495.2	8456.89	8914.08	10972.1	10860.7	10076.5	10489.4	10259.4	10097.7	9709.47	9764.6	9726.71	8957.83
Atg7	9101.87	9867.68	9063.71	9731.75	9661.39	9281.93	9626.72	9040.49	9298.34	8732.17	9483.28	10062.5	9490.52	10729.4	9214.29	10083.7	9936.27	9580.17	9954.66	9707.14	10597.2	9310.74	9500.8	9827.07	8848.02	9695.34	8941.45	10101.9	10997.7	9572.27
Lmnb1	93563.4	86617.7	94482.7	93059.8	88481.7	85975.1	101028	95006.6	108172	100194	95585.2	95993.6	84477.9	87468.3	77372.4	76741.5	79087.4	71138.7	78973.6	80861.7	74376.3	74200.2	67308.2	78897.4	80077.3	76583.9	76683.7	78885.3	86692.5	84155.5
Sptbn1	242488	238570	256832	250744	231086	232257	239204	238680	234781	236519	234248	237569	204123	211141	279972	280183	268852	271021	257850	252378	262945	267106	272869	288881	280355	271429	257328	258174	254160	275238
Stat5a;Stat5b	8203.84	7657.52	7290.53	6268.39	8205.22	9069.61	7698	8058.5	8129.1	7393.13	9364.53	8317.53	8847.55	7378.34	5531.67	6873.81	6208.64	5969.49	7821.94	6426.8	7452.92	6215.85	6101.03	6932.24	6832	7685.9	9971.13	7755.3	8101.03	8002.04
Ralbp1	4139.06	4742.06	3518.69	4163.72	4638.96	3985.5	4304.19	3938.13	4730.73	4471.16	4729.4	4581.43	5324.12	5327.17	4822.81	4610.36	5716.72	3345.83	4484.31	5827.28	5039.87	3873.37	3597.92	4191.45	3460.6	5093.53	4743.87	4957.89	3339.09	3194.69
Flnc	16155.5	17744.3	16601.1	16307.8	19224.3	20159.9	18763.6	18965	26873.6	29505.4	47857.9	51638.3	16437.4	15638.2	20384.4	20663.4	54911.5	54230.8	48927.8	49739.9	26427	26818.8	9925.61	10892	16412.2	16222.6	37130	37420	26488.3	28046.5
Bnip3	720.184	704.571	1102.62	1153.43	837.832	868.386	527.59	1035.42	864.472	284.409	532.316	886.242	NA	983.878	940.215	1077.48	924.346	1092.87	1476.83	1135.44	905.732	723.921	992.07	725.408	474.954	574.895	1069.43	1393.32	959.004	1373.21
Kif1c	2066.66	2182.67	1609.06	2302.3	2223.72	2149.23	2285.06	2085.03	2294.29	2246.72	2260.45	1982.63	2007.16	2162.11	2029.96	2106.05	2021.32	1743.87	1649.03	1913.44	1554.1	2271.35	1894.71	1583.59	1824.79	1893.81	2183.65	2354.18	2023.98	1827.24
Fkbp7	4733.5	4193.86	5117.33	5525.38	5107.64	4371.3	5339.53	3782.43	5064.69	3687.78	3813.66	5009.6	4782.76	4876.23	2383.95	2213.97	2356.12	2802.38	1647.48	1674.39	2600.55	2310.79	2263.24	2550.43	2260.63	2313.18	1909.65	2646.25	3089.49	1852.67
Srgap2	12172.4	13826.4	14631.5	14410.5	13462.7	13971.1	13906.2	13156.5	13311.5	13655.7	12266.1	12777.4	12983	10768.5	12267.4	12772.3	9907.31	11444.3	11218.8	9638.81	11781.4	10593.1	9725.05	11269.3	11115.5	12521.2	9928.58	11009.4	10990.4	11110.3
Atp2a1;Atp2a3	3815.92	6682.73	6579.1	6213.33	66925	66950.1	16624	17304.4	112727	101189	187852	172462	10183.4	7719.95	98239.1	81120.5	94686.9	83830.2	285665	261042	23067.3	23408	2368.18	2845.71	66249.3	65050.3	377458	322799	195752	199313
Avil	53902.3	55010.5	53897.2	56433.1	55874.8	57056.4	51937.7	52495.6	59402.9	59412.7	57294.6	58579.8	51066.8	49220.5	66193.5	65402.7	66446.4	67167.4	66713.2	61796.3	68093.5	69601	73373.2	77528.6	76114.7	76021.5	58749.6	60105.1	64048.7	66143.6
Kif3b	3122.17	3428.64	4082.57	3973.06	3660.68	4067.22	3433.51	3626.89	3456.02	3972.2	3320.13	3538.64	3521.86	3027.2	3718.49	4112.11	2977.26	3767.11	3266.2	3004.79	3288.57	4280.23	3651.96	4055.76	4041.54	3580.3	3474.68	3698.69	3846.93	2996.79
Thnsl1	2135.41	2473.89	3370.86	3003.59	2536.49	2867.13	2288.03	2232.03	1803.66	2300.52	3558.27	2903.9	2986.79	2771.86	2689.35	2905.07	1684.53	3474.29	4258.09	4045	3608.86	3079.12	2236.04	2380.81	2267.9	2395.54	3181.78	3813.29	2532.29	3758.56
Vps25	14530.4	15828.6	14427.7	14171.5	15272.9	16370	13638.3	13489.9	13011.4	13348.2	15016.3	12153.7	12489.2	11455	12312.1	12592	11740.4	9846.48	10905.8	12587.6	16144.9	13057.5	11363.5	12218.4	13392.8	10838.4	12392.5	10800.8	12467.8	11860.5
Trappc10	1354.93	1525.96	1613.97	1282.31	1712.64	1890.57	1482.18	1423.43	1915.86	1749.68	1456.27	1523.09	1266.03	1595.88	1365.99	1933.68	1548.81	2031.24	1565.47	2131.58	1947.83	1226.79	1549.06	1368.96	1146.11	1540.91	1144.48	1633.75	1099.4	1574.18
Rcn3	124076	114414	108049	95360.3	87242.7	85474.3	89777.8	71205.3	93822.1	83065	74804.4	65886.7	65311.1	65229.1	40468	36467.5	35311.3	33575.5	32711.5	38087.5	47039.2	36736	46157	38897.2	49508.7	46738.7	30441.5	37494.7	47381.9	34364.4
Hnmt	9984.71	11852.9	9295.3	10858.1	7450.31	10478.8	10133.5	10370	10647.5	9252.14	11108.6	12617.1	11367.7	12627.4	19618.3	17065.5	17708.1	16382.9	16141.6	16096	15080.8	14999.6	19131.4	17124.5	16977.4	16480.8	18587.4	16372.2	14902.8	15276.8
Eml1	44963.2	44685.7	47961.6	47125	44809.7	43203.5	46879.6	44255.6	47404.8	47985.1	46208.1	46534.3	45493.3	44591.6	42471.2	39954.1	41579.2	42781.8	42193.5	43378.2	42022.1	41743.6	43636.5	44556.9	44144.4	42523.4	37867.3	40678	40351.4	42709.2
Kif3c	2824.51	3601.52	4075.67	3336.49	4256.3	4193.24	3850.17	3471.18	4537.31	3539.47	3907.41	3297.22	3515.76	3611.26	3912.16	3684.45	4583.72	3915.73	3587.6	3464.2	4088.62	3840.61	3906.84	3622.89	3395.49	4325.77	3952.49	3392.88	4032.2	3557.94
Polr2a	3742.77	3740.16	3065.59	4015.44	3211.66	3581.12	4165.52	4016.61	4020.21	4710.43	3230.37	3546.82	4563.04	3320.52	3097.36	3100.48	2684.03	3329.36	2781.54	3114.36	2576.02	2595.61	2865.69	2905.5	3052.88	2802.45	3028.09	3263.31	3000.36	2864.04
Katnb1	2837.58	3249.64	3237.71	3489.66	3171.86	3201.5	2754.01	2698.63	3359.14	3071.49	3166.31	2779.5	3021.65	2771.01	3289.3	4062.3	3396.99	2954.91	3053.92	3126.7	3099	2820.26	3134.23	3583.72	3524.52	3497.68	2332.57	3651.23	3660.89	3190.04
Atic	39467.9	39346.8	37751.4	35157.7	35385	34576.1	37816	37084.5	35813.7	33726.6	39891.7	37652	38954.9	41981.3	49416.6	45945.3	44410.9	45015.4	43501.1	41593.7	43120	47412	46381.4	43156	46945.3	48024.8	48550.4	46965.1	45713.7	44135.8
Rai14	9800.67	9976.87	10326.3	10811.3	11264.9	11112.5	10254.9	10134.9	10708.6	10603.4	9438.94	9002.83	10255.5	8822.68	10405.9	11154.5	9930.99	9806.15	9744.19	9488.27	9800.07	9642.18	9463.72	10018.9	11020	10544.7	9244.34	9871.12	9664.64	10046.8
Wwc2	3142.57	3396.85	3148.32	3318.81	3656.2	3413.97	3703.86	3909.32	3339.45	3654.53	2611.84	3312.35	3683.98	3628.99	2889.51	2837.44	2461.68	2285.47	2600.1	2600.79	2783.64	2601.64	3113.03	2474.5	2821.9	2879.09	2638.53	2588.3	2738.6	2426.53
Dctn1	33142.8	34319.4	37283.1	36042.3	35710	35782.3	35851.2	37539.7	36395.4	37593	35260.6	37480.5	32157.9	33273.2	34703.9	35055.5	36522.6	35816.6	33567.9	33276.6	35255.8	35294.1	34166.1	35431.5	33385	32074.1	30648.2	32647.3	33082.1	33280.2
Thoc5	2064.2	2500.69	2351.9	2264.34	1778.71	2437.03	2363.73	3061.79	2878.52	2670.3	2129.64	2100.84	1837.19	2180.83	1375.04	1970.86	1728.35	1781.72	2497.64	1853.97	1448.57	1733.31	1358.45	1622.07	1587.08	1883.11	2306.88	1817.93	2092.04	1261.98
Ghitm	9925.77	11129.1	12881.4	12157	11792.6	12635.7	12589.6	13231.2	11167.1	12317	13033.8	12980.1	10427.3	11722.7	9659.12	9666.42	11358.5	10297.5	9006.87	10853.3	9739.24	9795.53	9318.85	9041.16	10001.8	10367.1	9798.03	11631.1	10576	12286.4
Ganab	55487.5	51090.5	54153.3	55641.9	52346.2	50882.1	55235.9	55804.6	52527.8	57323.5	52842.4	49606.6	45776.3	48753.5	39365.1	42389.6	34301.1	34978.8	34786.4	38469.8	36142	36342.2	39248.6	38083.3	42061.7	37021.6	36840.8	36990.1	38872.8	39970.6
Pdcd10	32944.1	27864.5	35786.6	29858	26596.6	27284.6	34810.9	29087.8	31244.8	29643.4	25354.3	26241.9	26317.6	20193.2	30048.8	24576.5	18640.4	20236.1	23684	20719.1	21201.1	23025.1	25565	20794.9	28608.9	23322.8	31046.6	28249.8	25429.6	21722.2
Vps35	61241.7	55516.1	60373.2	56340.5	56496.7	60129.8	56947.8	58293.9	52328.5	54070	57341.4	57452.7	51184.3	55554.6	49217.7	48394.6	47918.6	48352.1	50805.5	47275.9	51971.1	53567.2	42565.1	47213.8	48715	48138.8	50108.1	50918	47094.5	49552.4
Ccdc3	1028.66	1545.22	891.035	788.657	657.357	1125.42	1064.23	602.428	891.562	NA	NA	NA	NA	696.594	NA	972.826	1166.71	NA	1065.22	1673.69	1061.73	590.953	1030.73	337.519	NA	NA	551.264	NA	1022.23	NA
Rnf31	1531.61	1490.41	1848.65	1564.38	1727.04	1705.11	1874.46	1895.56	1498.81	1807.56	1494.24	1189.97	1243.93	1782.66	2088.74	1934.56	1908.57	2521.64	1896.93	1496.41	1916.15	2357.03	1468.11	2003.63	1770.86	2169.97	1782.52	1724.52	1388.38	2270.23
Slk	13579.8	12754	12806.1	13768	13326.8	13849.1	11077.6	13353.7	12577.7	12795.6	13311.5	12575.4	12434.1	11810.7	10164.8	11234.6	12627.4	9990.7	10656.3	11209.7	11128.9	10569.4	11472.5	10580.3	11806.7	12883.4	10986.2	10440.3	11335.4	12337.3
Sfpq	46036.8	42373.7	47048.7	42241.3	44881.4	39489.4	47185.3	46347.2	47702	45083.7	42500.8	39803.4	42299.8	40967.9	32481.5	31929.6	31180.9	30863.8	25755.3	27513.7	31287.8	30990.9	28423.3	31827.3	31797.4	28997.1	28000.5	27063.1	32604.8	32149.8
Pspc1	6205.9	5422.43	5886.78	5823.45	6051.61	5584.67	4331.5	4240.24	5831.05	5125.75	6475.67	4886.4	6785.67	4825.04	4556.93	4069.51	3532.29	4019.19	3959.3	4040.07	3592.18	3912.42	3808.01	3955.32	4411.76	4319.75	4582.53	4442.98	5906.78	4922.51
Prpf4b	1499.09	1085.29	1447.47	1321.55	1148.59	1428.06	1707.06	1527.23	1117.2	1102.77	1126.48	996.825	1190.23	1165.87	1255.31	978.938	1014.63	859.339	1127.42	1012.37	1089.72	1057.95	869.88	1171.09	846.904	1333.19	1318.1	1265.67	914.02	1373.08
Rb1cc1	1943.94	2304.06	2017.13	2350.28	1983.05	2327.46	2151.04	2231.42	2336.86	2150.88	1931.42	2178.37	1336.41	1745.54	1711.07	2162.3	1810.62	1668.14	1860.72	2056.15	1910.76	1775.18	1753.88	1931.8	1476.54	1961.96	1468.49	2168.02	1865.39	1928.07
Tns3	29220.6	28394	27320.6	26331.2	28341.9	27902.5	23321.1	25833	25790.6	28141.6	24115.1	25208.5	26351.3	27242.7	31247.3	29615.9	30359.6	28821.1	24371.6	26533.9	29040.4	31945.9	29325.9	31882.8	27247.1	30863.7	27515.6	29223.9	26832.8	28390
Abcg2	8635.61	8723.88	8959.35	9499.92	10239.1	8212.38	9545.79	9782.02	7877.05	7958.58	9131.11	10374.5	10745.6	10873.9	16258.1	17732.7	20703.7	19547.8	18666.6	18631.6	19718.6	20805	13984.9	15852.5	14685.3	16112.3	13446.8	15949.6	14851.9	13656
Nudt13	NA	4740.58	4873.79	4690.23	5220.73	2342.81	3780.14	4852.53	4264.47	4473.89	3913.49	4712.41	NA	6467.92	7110.33	5394.06	2527.42	7606.86	6011.28	6640.64	4624.61	3123.5	3383.93	6050.85	6909.03	8500.53	6356.45	5181.45	8331.93	7024.98
Ccdc9	5404.15	5868.17	5701.49	6047.53	4751.51	4926.17	4676.15	6339.17	6253.58	5007.11	5669.89	5152.23	5613.34	5753.44	4974.1	5957.06	6043.53	5452.85	5081.52	5115.34	4831.55	6646.49	5986.73	3949.45	4759.97	5691.26	4856.63	7059.27	6281.44	4876.45
Ppp1r12b	10303.4	9758.11	8325.59	10627.5	8559.13	10664.3	7923.63	8606.51	8502.49	11035.8	9148.79	9404.74	9205.62	7412.77	11073.3	13656.2	13031.2	14622.6	12625.4	16727.9	10355.6	11478	8830.77	9969.48	8105.31	7729.55	10975.7	11973.1	10730.2	14669.3
Aprt	31024.1	32624	25741.7	25570.8	25213.1	19083.8	25123.3	21342.1	27322.7	25677.7	30913.5	27991.9	27769.8	27055.5	25564	22108.5	21193.2	23429.6	20886.4	24085.7	22793.1	22368.3	27529.3	29077.5	25618	27983.9	25268.6	24657.5	27305	27827.7
Ccpg1	1456.5	1187.95	1479.73	1003.61	1904.26	1982.21	1477.34	1680.38	2147.2	1762.04	1519.12	1486.16	1190.74	NA	NA	1757.68	1281.77	594.687	1850.6	1722.97	1260.88	1644.11	1277.77	793.581	NA	1109.94	1873.34	1549.83	1920.63	1690.24
Ccdc6	12094.9	11638	12665.7	13814.5	13667	12456.9	11989.6	12889	12183.4	13343.2	10948.8	11730.9	11113.6	12740.1	12229.6	13446.2	11325.7	13375.6	13288.4	12187.8	12219	12103.1	13778.5	13948.7	14720.9	13367.4	9772.52	11902.7	12690.3	11277.9
Nln	7924.46	6660.34	6413.05	6205.29	7024.16	7561.11	7320.04	7073.15	6882.73	7626.05	6451.8	6759.75	7632.95	7491.21	4904.79	5913.13	5317.5	4934.81	5271.04	5228.46	5813.53	6382.7	5787.98	5155.99	5757.18	5601.51	5444.48	5760	5357.29	6393.32
Ap4m1	742.748	1136.07	958.395	1408.13	1078.87	1051.36	1121.06	1200.28	799.7	1598.03	1258.33	1356.32	1105.65	995.651	1284.32	1180.28	2385.48	1620.81	1050.57	1144.49	1087.59	NA	2049.15	927.706	1115.06	1192.27	1339.06	955.072	1011.61	1219.69
Idi1	74191.2	61297.9	84300.8	65692.2	72995.5	67635.7	63517.4	63706.4	76301	65879.5	56292.4	55176.9	58889.7	61370.8	19521.7	24523.7	19788.8	23075.1	19686	18771	24846.1	21408.3	25777	23436.9	29585	26490.8	24822.9	28749.5	24085.6	22908.6
Acss2	31833	28712.7	30625.1	31644.3	28396	32041	29730.6	30025	33048.7	34452	30700.1	31286.3	31929.8	31920.5	17787.8	18228.5	16425.2	17618.7	17088.9	20401.5	17180.8	18203.7	17457.5	22260	17494.2	17767	18840.1	22883.3	18260.2	20105.9
Smc3	10201.6	10351.3	9789.31	10712.3	10570.1	10277.9	11109.1	11016.3	11195.4	10015.8	10547.6	10373.6	8541.42	9453.05	7743.64	7761.8	7062.06	7117.59	8103.42	7407.08	8239.51	7339.92	7382.77	7821.14	6676.39	8197.01	7084.22	7229.31	8904.04	8199.57
Pgap1	1217.18	1622.16	1197.21	1464.98	1789.12	1203.51	1396.13	1475.43	932.539	1163.94	1403.37	1574.69	1571.05	1477.2	758.07	1163.13	918.726	620.509	594.529	574.721	850.168	567.546	951.225	1239.33	484.231	784.823	353.579	776.116	774.661	1258.69
Rad50	1798.1	1658.5	2077.1	1864.87	1591.53	2409.99	1977.82	2186.49	1767.21	2192.04	1692.09	1811.25	1531.46	1812.49	1405.5	1599.76	1558.01	1621.72	1447.09	1071.49	1428.49	1332.76	1106.02	1242.47	1479.18	1739.76	1652.22	1585.98	1654.74	1422.23
Rps3	131505	123155	127601	118866	114172	115672	138246	138181	126153	132070	126916	128355	116470	127686	77981.8	71403.8	81333.6	80142.8	84941.4	78752.1	82156.4	79843.4	79248.6	74141.8	74489.8	69359.5	76859.5	81192.2	83072.7	83534.9
Zfyve26	1311.96	984.508	1079.98	NA	645.781	NA	732.928	NA	NA	NA	828.493	NA	NA	NA	NA	NA	1360.94	NA	NA	NA	NA	NA	1418.72	NA	NA	576.093	NA	NA	NA	NA
Tmem132e	307.89	329.85	410.405	433.613	536.732	300.358	203.882	195.864	319.034	729.704	131.512	167.148	142.734	404.351	NA	309.427	401.932	523.646	203.051	NA	499.848	NA	140.773	270.295	162.023	312.711	NA	416.232	284.189	NA
Strn	12454.1	11417.1	12714.9	12128.3	11578.9	11865.8	11555.2	12145.8	12291.8	11666.6	11911	12247.9	10887.2	11314.2	11073.1	10823.2	8745.04	10289.9	9256.13	9500.91	8338.19	8547.7	10048.4	10188.8	10422	10853.5	9839.62	10329.7	9664.34	9942.44
Strn4	11767.3	10457.9	10410.7	12312.4	10042.9	12568.3	10508.8	12860.7	11278.4	13136.8	10907.8	12152.6	11671.5	12027.9	7319.09	8422.42	7406.33	7430.84	6559.27	6969.68	9114.21	9624.74	8034.03	6938.01	7408.35	8150.94	7099.24	9947.1	8399.76	7460.79
Ndrg2	22942.9	23470.8	17204.8	20084.7	21987.6	21211.4	19949.8	21065.5	27549.5	29370.4	32229.1	34031.7	21434.4	21407.6	23159.6	23880.7	25851.6	27288	41077.4	42946.3	20898	21728.1	20638.1	20658.4	23654.5	21118.5	33896.4	32211.8	33140.6	31352
Itga2b	758.933	828.429	2802.81	3479.64	NA	NA	877.215	1090.79	NA	NA	NA	326.001	NA	NA	1183.32	1446.03	NA	NA	NA	NA	NA	NA	601.382	200.965	814.074	1686.18	1319.47	1748.41	812.255	985.536
Abi1	27953.2	25911	24517.3	26673.5	26194.9	27468.5	24320.1	29780.5	28322.4	27359.1	26613.1	25011.3	26195.8	26681.5	31486.5	28953.9	28226.3	30596.1	26057.3	28765.8	26338.9	29840.8	26294.6	26184.7	25960.3	27320.7	24068	29334.3	28661.6	28344.7
Plod1	6893.48	7231.68	6415.71	7341.89	7127.05	6866.81	7624.16	8258.37	6054.57	7274.68	5703.29	6169.17	6414.72	5873.34	2411.82	2403.7	2214.72	2068.55	2202.16	3037.34	2341.46	2613.28	2442.39	2294.26	2260.67	2197.94	2897.18	3001.8	2776.25	2321.1
Usp5	73920.4	75578.3	73521.4	69420	67690	67439.2	70019.1	64667.9	71219.8	69431.4	69643.6	69853.8	67285.7	66958.7	86864.7	80635.8	86530.1	83038.1	81835.8	76427.5	89866.5	82318.7	84354.8	87257.1	84462.9	81775.6	81476.1	80454.4	81772.8	83123.3
Wdr11	3943.58	4385.95	4224.12	4661	4454.48	4698.71	4111.14	4283.69	4050.94	3720.07	3717.44	4017.47	3705.02	3229.25	2888.87	3173.32	2564.22	3065.55	2971.19	2753.65	2348.89	3304.81	2775.11	3047.8	3009.96	2805.56	2484.5	3021.58	2940.38	3156.87
Acsl1	33331.4	34303.2	28791.1	27027.1	22344.3	21778.6	37825.3	37385.9	25222.1	23802.8	38658.8	35336.5	24441.4	24388	31874	32890	32952.6	30084.6	42829.8	38138.2	22172.1	21498.9	29873.3	26583.7	25755.5	27294	49144.2	49973.9	40529.7	41000.2
Fxr1	8774.46	7440.67	8406.87	7801.78	9931.33	7698.53	8170.28	7394	10603.2	9323.01	10779.4	10332	6910.77	8459.42	7920.78	7375.16	7212.19	7186.77	9306.3	9435.3	7925.17	6344.57	6066.49	5186.32	7745.56	7314.65	9126.47	8939.72	7432.08	8868.47
Aldh6a1	81929.2	84626.6	75478.7	72859.8	75027.8	75441.9	76794.1	76050.6	80833.1	82661.1	91353.9	90766.8	83623.9	90476.6	117979	112798	117997	117637	121337	127164	108272	105562	99372.7	102043	98089.5	98154.8	126817	118403	115375	122660
Diaph1	4542.7	5189.82	4764.44	4836.42	5102.23	4979.99	5334.7	5456.45	4517.38	4269.99	4330.23	5238.26	5496.92	5058.24	5462.73	6350.87	6342.74	5912.29	7069.2	7931.52	6944.54	7427.82	4194.18	5860.05	5368.3	5304.24	5778.36	5906.79	6788.31	5886.69
F13a1	94820.7	96544.8	82650.7	72557.3	72102.9	73091.5	100983	91953	77840.7	72004.4	104527	102798	80682.4	88328.3	98057.4	97198.7	95609.2	94268.7	128782	113726	131294	126408	82168	81246.8	82617.3	86320.2	86391.3	83599.6	90864.8	98864
Myh11	75142.3	71711.5	25978.6	26734.1	19046.4	19408.4	27484.7	27746.9	15631.8	16438.5	32202.2	29713.6	29969	31268.2	56483.7	55824.5	37143.6	33236.6	33143.7	33074.4	33464.4	34218.9	26163.1	27442.2	22055.1	24225.1	25673.9	28048.4	96973.3	99187.2
Dhrs7b	12198.9	12439.1	13288.5	12766.5	11938.1	12072.8	13862.6	14437.9	9976.99	9713.73	9726.22	11788	10494	11200.4	11340.3	11584.9	9997.03	10178.3	10832.3	11770	10001.1	9101.08	8511.42	7244.36	7738.25	8674.76	13026	13103.1	11255.9	11768.5
Gpm6b	39232.2	41657.5	45816.3	48702.9	30923.2	36323.4	36915.8	28591.2	35826.9	34000.4	34006.3	30510.4	36174.4	21403.7	22530.1	42064.2	34806.9	36264.2	46894.5	50048.4	30908.3	33501.1	39949.1	47618.6	50780.9	50244.9	39530	43107.7	33404.9	56722.7
Pkd2	3030.28	3337.68	2852.86	3541.43	3536.84	3902.12	3632.04	3930.89	3299.81	3699.39	3376.14	3556.06	3409.35	3492.36	3003.22	3424.86	3297.67	4071.34	2601.72	3299.91	3325.45	3833.21	3310.97	3691.37	2989.11	4141.81	3415.94	3617.84	3301.85	3226.74
Dpysl5	103740	99825.2	120152	113299	90895.9	96084.2	102688	101883	105420	97370.4	107013	103339	86234.2	87843.5	159476	144759	145114	145629	150838	138128	151241	145935	164185	171231	168411	152418	157153	147017	143878	148043
Jam2	743.215	1083.25	879.949	997.395	1181.87	1105.74	1493.21	1600.95	1112.55	1310.76	1786.97	1500.14	NA	1321.97	1774.6	2154.65	2206.13	1830.32	1218.82	1621.89	1555.06	1591.45	1914.24	1738.74	1895.17	1657.98	1793.33	1196.33	1206.07	1427.09
Scpep1	11311.6	11403	10891	10442.1	11208.3	10152.1	11427.5	10368.6	10656.2	11675.5	11604.4	11703.6	10948.4	9177.28	7259.01	8149.68	8452.09	8940.92	7134.75	7845.01	9691.07	9040.25	7162.51	8455.99	8880.29	7551.05	8236.33	9681.42	7454.4	8426.31
Ncald	9799.46	10147.9	11376.3	13161.7	12839.4	11257.4	10335.7	11766.2	13188.3	11624.5	9597.74	9931.02	13542.3	10216	12522.5	10578.1	10645.5	9953.97	10315.4	11253.6	11244.7	9283.71	10547	11452.3	10712	12545.3	10716.3	9320.65	10261.3	10758.4
Gfap	1472.51	1333.95	2336.89	2633.88	861.425	1206.76	613.767	1398.87	1066.68	764.583	1621.4	1842.69	1854.86	1262.74	2339.67	2622.59	2537.81	2189.51	1864.46	2364.63	1503.79	1897.95	2061.64	2307.51	1970.96	1910.83	1485	1773.34	1479.77	1534.58
Aldoc	40910.3	39640.3	42036.1	41383.9	39283.3	41396.6	42662	42000.8	47768.2	47161.8	39067.8	42374.6	39866.3	43202.7	37597.3	42699.8	38319.9	39629.4	38381.9	40891.6	41862.1	44725	44202	48251.2	44361.7	41858.6	38881.3	38302.7	39797.5	45833.6
Hebp2	11195.7	10082.9	9903.72	7991.19	9978.33	9298.59	7681.01	10137.5	10700.8	9167.67	9941.21	11104	8549.37	9908.77	26641.2	25533.1	21057	21265.9	24556.9	22613.2	23985.8	22801	26065.7	27785.5	25636	26737.4	23190.2	21634.1	24284.2	22658.7
Nub1	4170.51	4364.46	3907.72	3629.16	3953.07	4000.33	3420.41	3408.79	4178.21	4178.1	3291.86	3906.67	5520.29	3361.95	2395.32	2765.76	3488.55	2671.88	2565.52	3514.32	3771.09	3370.25	3464.22	3780.69	3888.3	3467.21	3831.17	3650.34	3476.85	3796.8
Atp13a1	6286.15	6947.22	6197.04	6709.56	6820.29	6929.32	6826.98	8083.97	6667.33	6762.08	6261.66	6509.07	7226.56	7077.73	5349.28	4860.46	4356.61	5189.56	4203.98	4807.07	5149.05	5021.79	3626.15	3868.22	4199.01	4504.79	4177.35	4523.91	4298.77	4581.76
Gatm	45735.1	45092.9	47729.1	49695.9	42516.6	38806.8	48816	44846.7	43519.2	40879.6	41400.6	41286.2	40497	30690.1	40793.2	41751.2	36303.5	37740.3	32324.4	36763.3	32235.4	31206.5	43714.1	41820.6	40413.6	37489.2	36324.1	39594.3	40634.6	36090.8
Clec3b	17202.4	20707.8	16203.3	16398.5	17815.5	17472.9	20440.5	18566.8	14888.1	12828.3	18564.8	19521.6	16108.2	18209.9	10281.5	9440.3	10466.1	8173.72	11820.8	13166	15461.8	12494.8	11389.2	11809.7	14940.3	14202.5	11294.3	13704.8	15815.3	11276.1
Bcap31	48297	43650.4	44513.6	42179	42715.9	38768.1	45009.5	48088.6	43435.3	42234.1	39768.1	39365.8	48253.5	34204	45352.2	39629.5	39755.1	34838.6	30805.1	35486	28568.4	38357.5	38886	40775.6	41063.8	34867.8	37369.8	38272.4	40421.9	40007.5
Arpc4	91471.2	93128.9	86566.5	65841.6	87209.8	86841.9	92193.1	94364	81819.1	88413	87733.3	102653	88936.2	94836.2	82663.1	72207.3	97042.4	93438.8	89820.2	74608.3	105055	103386	93050.3	92056.5	87978	86058.5	91360.2	81952.8	88832.4	94902.5
Igf1r	662.223	366.478	375.655	477.536	533.042	414.718	323.4	449.011	653.662	401.075	376.487	511.41	799.353	333.708	468.783	648.442	491.963	580.426	439.328	670.475	600.593	425.557	628.254	406.171	837.903	671.285	732.878	828.013	801.525	304.953
Dock11	5351.11	5607.33	6152.28	5828.6	6448.3	6072.38	6156.04	5916.94	5950.59	6127.57	5795.76	6308.48	5419.46	5802.67	5537.81	6229.02	5418.36	5963.76	5344.43	5993.26	5380.31	6607.94	6275.5	6659.59	5700.19	6786.9	5272.03	5135.16	5378.44	6391.96
Ehbp1	8525.23	9806.15	9507.57	8806.21	10285.4	10797.9	9598.6	9068.03	9597.28	9620.53	7968.15	9234.77	8876.96	9773.33	7164.69	8072.56	7426.71	8039.03	7011.56	7404.72	7875.16	7749.75	8068.47	8150.97	7408.76	8067.24	7428.34	7053.21	7870.55	7488.12
Tm9sf4	10922.2	10510.2	12213.7	9733.39	12478.4	10361.7	14176.9	12787.7	9492.68	11473.4	10923.1	11188	9026.76	10778.1	5973.96	5422.66	5072.33	5632.64	3541.27	5284.69	5833.37	7885.18	5205.29	5373.65	4924.85	5350.98	4872.96	5509.7	5900.09	4448.26
Mark1;Mark2;Mark3	2047.94	2633	1847.24	1717.84	2024.99	2232.02	1643.19	1339.27	2995.51	1203.97	2150.13	1932.25	2600.09	1619.63	2103.88	2380.93	2333.94	2015.13	1381.91	852.384	1741.04	650.864	1679.89	2309.29	2675.34	2656.83	1765.57	1181.59	1630.37	2774.23
Mark4	515.987	1158.8	235.65	1105.6	769.289	810.156	971.383	1199.44	1105.3	734.335	675.375	871.644	1541.78	668.565	839.178	1064.8	653.487	740.872	440.681	534.178	941.582	930.652	1236.07	992.169	1087.93	1120.82	650.388	976.497	682.274	1265.89
Sik2	NA	3585.5	2301.99	NA	3340.78	NA	3101.05	2794.89	NA	NA	2813.3	3236.35	3417.35	2598.74	5543.16	6198.07	6254.95	NA	NA	NA	4544.81	NA	2554.35	5046.97	NA	5019.07	4892.3	NA	7096.66	NA
Hexim1	1649.35	1393.53	1508.93	1793.28	1012.85	2012.4	1894.45	1574.99	1720.47	2041.52	1897.81	1149.91	2250.95	1491.42	1038.2	1627.88	1204.66	1280.84	1224.92	2207.53	1832.17	1324.86	1488.26	1420.81	1392.34	1562.26	2615.65	1603.07	661.785	1527.81
Lpcat4	734.37	623.455	752.713	1169.4	1185.08	971.844	999.113	947.3	1035.97	889.374	1044.17	1027.29	981.524	1029.91	690.977	777.343	727.192	990.534	972.342	927.287	868.608	1102.96	836.247	759.831	503.561	674.882	838.828	518.446	605.236	663.161
Casp12	538.319	716.993	830.783	578.534	780.193	776.543	1211.41	1134.47	825.107	247.488	1294.88	727.879	928.883	801.728	1059.38	590.021	957.138	NA	NA	641.404	NA	823.403	NA	NA	956.166	702.288	742.481	852.024	784.089	794.732
Macf1	8903.73	9937.17	9510.68	9788.34	9950.73	10003.3	9998.68	10624.1	9011.63	9639.41	9281.99	9549.01	8929.97	9287.41	8189.87	9203.56	10034.7	10404.6	9843.48	9413.97	11220.8	10695.7	9063.04	9441.5	8071.58	10622.7	8930.65	9894.76	9195.43	8768.27
Kpna3	14905.2	14666.8	15330.6	13214	15552.2	15911.1	13168.4	14419.4	14005.3	12694.2	13653.1	14605.3	12558.2	13505.7	13696.6	14388.1	13553.8	14055.6	11751.7	11640.5	14151.1	15065.8	12526.2	14150.5	12761.1	14405.5	15420	13819.5	14661	11601.3
Fga	151103	140964	212407	196913	98963.1	99957	145606	147922	93253.7	92996.8	94160.7	96954.8	84256.9	82935	111814	102553	67815.3	64087.2	61102	65875.9	71476.7	75373.6	58777.9	64232.8	98076.9	90697.8	101904	108056	80723.6	87123.5
Lrrfip1	581.945	504.526	413.486	840.168	636.345	771.93	709.31	930.315	311.629	604.546	807.003	672.152	846.35	718.489	396.108	948.665	854.372	1403.97	840.18	719.654	740.645	915.16	485.451	514.334	633.937	196.106	612.34	441.917	829.229	603.348
Nap1l4	42227.9	40243.2	41442.7	44298.8	43434.3	44107.3	46914.6	42334.1	45825.1	46817.5	44973.8	43083.4	40152.3	38119.6	38137.2	47126.4	37911.5	39401.1	34053.2	42841.1	36822	34506.4	38036.6	41759.1	39455.2	39292	38653.7	44791.9	39811.8	38574
Nsf	84777.3	81564.4	88547.8	84802.4	86623.6	87919.7	86936.3	86014.4	89171.8	87073.4	88517.8	91687.3	83451.3	87365.8	129980	125175	125770	122889	116868	111164	126588	128265	120332	122163	127381	118817	115548	109660	114289	118449
Nde1	5509.97	5091.6	6058.67	6992.14	6197.11	6482.94	6669.38	6649.96	6797.18	6506.42	6116.31	4870.21	4831.69	6092.05	5079.69	4937.66	5019.38	4714.25	4131.73	4860.77	4572.09	5257.46	4498.08	5260.9	5441.26	5253.59	5036.63	4779.95	5356.25	4590.96
Hmox2	4997.49	4674.1	4738.61	3989.85	4633.73	4501.09	5304.29	5146.51	6010.86	4966.24	5158.49	5840.11	4686.51	5855.9	4505.58	5057	5486.83	5958.49	5212.1	4437.72	4722.32	5372.84	5635.98	5195.05	4488.48	6291.34	4062.34	4264.95	5081.68	4757.14
Cyp4v2	160.01	NA	NA	514.35	285.222	277.011	290.198	83.1542	NA	381.534	436.666	296.516	NA	NA	NA	198.965	NA	123.39	331.072	468.08	NA	228.379	NA	132.908	NA	NA	304.736	326.784	215.473	NA
Pgk1	314452	303322	280353	250011	306674	310195	262239	264157	354421	353985	374361	380137	305141	310756	426985	387836	362572	357612	611027	611066	329252	344015	383113	363597	418309	388094	596630	555342	453960	505066
Mybbp1a	5568.74	6266.01	5560.22	6310.47	6567.24	6831.85	6925.7	7388.7	5823.18	7053.19	6609.42	6754.39	6895.95	7216.56	4285.3	4136.11	4599.75	4110.46	4326.42	4499.06	4443.76	4721.53	3826.15	4313.38	4417.94	4785.65	4586.14	5230.62	4422.03	5649.58
Iars1	12202.8	12693.5	13520.8	12762.9	14067.8	13280.9	13038.6	12693.5	12861.1	12111.5	12818.8	12233.2	11912.2	11457.5	6869.64	6946.81	7703.03	7610.6	8680.27	8455.5	7154.64	7577.75	7298.49	6084.31	6442.48	7546.98	8361.65	7711.41	6569.03	7548.31
Sirt2	58314.4	58045.9	59206.3	56902.4	59116.8	52799.5	63098	57156.7	58458	56418.1	60518.4	60858	56897.9	54201.6	64779.1	62287.9	60284.1	57342.8	57940.4	55061.1	60480.2	58277.8	65008.4	65728.8	68534.1	59130.7	59612.5	56068	59962.5	62472
Actr3	63299.1	62719.1	63162	63432.5	57256.6	55450.3	60752.1	58304.3	59256.5	56484.2	64780.6	70561.3	68644.2	68831.7	70189.8	63525.7	62833.4	61465.4	63971.3	65521.4	63417.8	55469.9	67376.1	61112.8	62883.3	58530.2	65044.7	61271.8	59541.7	59801.5
Nubp2	2286.89	2852.62	3023.47	2353.85	2748.08	2750.98	3046.42	2299.89	2330.53	2246.36	2916.71	2612.95	3037.5	2945.24	2334.47	2321.85	2204.75	2049.83	2622.19	1315.81	2413.53	2225.13	2764.04	2592.27	2467.43	2908.24	2419.85	2132.8	2381.11	2217.92
Lpgat1	NA	666.162	NA	1406	NA	817.372	1001.72	1158.58	1169.06	842.367	1299.35	906.941	NA	1047.59	1355.98	862.617	736.127	1249.55	1332.11	1126.17	1190.84	826.318	678.454	821.679	865.676	880.99	1400.2	1234.18	1618.98	1625.2
Apob	6106.26	6264.84	5425.02	5503.77	3637.5	3206.95	5747.7	6710.7	2837.88	3128.68	4018.14	4409	5482.36	4211.22	3393.4	3535.64	1325.6	1861.99	2324.65	1821.21	2132.26	1937.83	1130.5	1409.66	2736.47	3146.62	2860.83	2755.52	2204.46	1726.23
Myo7a	7943.48	8791.54	10045.6	10409.5	10712.1	9407.04	11059.4	10652.9	8984.19	9949.44	8351.3	8684.69	7392.14	9234.75	4660.48	4565.82	4770.11	4411.03	4268.02	4039.36	4373.63	4727.24	4555.53	4560.96	5602.07	4687.95	4258.99	3899.49	4014.66	4335.31
Lsm8	20307.6	19325.2	15120.4	17767.7	18928	18581	18676.4	19222	20605.3	20643.3	22830.4	21447.7	18346.3	20546.3	10166.8	14931.4	11499.2	10346.7	10898.6	11954	16200.8	14485.4	12248.5	11972.6	13395.1	14305.7	11832.9	13358.5	13016.1	12196.3
C8b	10306.8	10439.4	7493.92	9503.16	8339.5	7980.04	6557.42	6904.69	1654.48	2156.57	3306.48	3155.84	2985.05	2728.27	9195.36	12324.8	8231.19	9334.66	10357.3	13380.5	10920.9	10874.3	1886.78	1516.49	1604.38	2324.68	1690.68	2194.04	1419.26	1060.14
Chordc1	21922	22085.3	16825.6	21939	24852.7	23815.6	20697.5	23253.2	23008.4	20461.7	25537	23947.8	26153.2	22950.9	23899.8	25821	29708.3	26861	22502.7	23945.6	27778.2	25741.8	24382.5	30039	28510.6	25007.1	26445.2	25817.4	26647.7	25987.6
Rack1	102554	92831.9	104402	95274.4	90757.8	85408.9	101748	99099.5	101352	96983.7	102167	97761	94727.6	96523.6	67259	64258.7	70803.7	62841.5	69949.4	61409.3	64346.7	62921	65192.7	62527.1	61379.8	59080.6	67349.7	65342.9	65043.7	68264
Glo1	102794	100308	88233.4	81172.6	94227.6	86126.8	84431.4	84144.5	97782.4	96243.5	106883	99992.1	99227.4	101694	119852	107747	118442	113857	121385	120076	126978	107901	124563	130744	132356	125762	119572	128791	117004	122320
Azgp1	20330.2	19491.8	12448.9	14036.8	15525.1	16215.4	13904.7	14280.2	10145	9904.1	17111.7	17018.1	14343.5	14212	18011.3	17558.4	10522.7	11863.8	16061.7	17081.9	18912.1	19728.1	14930.5	16176	25430.5	24925.9	18412.7	19394.8	18088	18486.5
Hnrnpul1	7704.05	8185.42	8847.87	8228.4	7700.08	8474.13	8370.44	7960.69	8738.4	8802.92	9541.5	7956.4	9425.91	8530.08	6372.8	7015.31	6301.43	5667.74	5565.83	6226.08	7049.28	5472.81	5794.55	6746.4	6213.33	6552.51	6826.66	5925.15	6806.75	5944.21
Dock9	14416	13938.8	13072.8	13631	15709.8	16792.4	14685.3	14996.8	12876.6	14382.5	15050.1	14514.8	13430.9	14056	13471.2	13842.7	14014.5	14445.5	12813.3	12654.4	13475.8	14149.6	13902.3	13518	13961.1	13620.5	12968.4	14100.3	15187.8	15026.5
Gcc2	1945.31	2204.85	2150.78	2361.19	2358.95	2235.66	2466.25	1876.62	2499.2	2315.79	1784.61	1935.39	2069.77	2038.51	1222.42	1440.5	1356.21	1358.08	1170.77	1265.37	1251.31	1549.82	1235.96	1186.65	1514.11	1502.64	1498.46	1367.14	1617.34	1359.22
Trdn	NA	NA	NA	NA	2382.72	1865.41	NA	NA	1708.92	2731.16	1618.83	2954.16	NA	NA	3063.64	2132.2	2451.21	2409.34	4567.21	3626.52	NA	NA	NA	NA	2521.18	1767.99	8512.28	5080.94	5156.89	3803.7
Kera	6688.21	6838.92	5993.31	5054.28	7026.49	5430.39	12740	11720.4	7861.57	7900.45	7475.03	6587.24	6647.75	8365.38	2911.43	2987.2	3316.09	3160.57	1923.52	1360.64	3208.7	4404.6	4226.88	3937.51	4727.87	4344.04	4155.83	3507.57	3992.37	3360.82
Lrrfip2	6846.9	6732.12	6120.36	7854.4	7017.42	9061.86	7031.14	6947.95	5704.7	7498.4	7066.98	6359.15	7074.25	6670.46	7494.39	9593.18	7614.88	8395.99	7242.87	8511.51	7017.15	6468.34	7167.23	9057.25	8686.61	6546.42	7698.76	7081.26	7648.71	7667.3
Myo1e;Myo1f	5636.71	5310.58	5950.93	5321.31	6684.89	6472.89	6473.59	6698.75	6888.12	5981.84	7842.52	5472.77	5409.31	7434.23	6703.3	6051.75	7078.28	7642.85	6125.24	5863.88	6370.37	7953.98	7854.33	7645.74	7142.31	7384.13	6107.35	5856.13	6791.54	7503.64
Dcp1a	2463.73	2006.73	2353.33	2435.42	1715.53	2484.34	2775	1787.85	2458.49	1905.97	1874.44	1985.61	2141.48	2779.58	2353.68	1742.68	1656.78	1469.44	1518.86	1052.01	1653.65	1510.85	2056.66	1289.56	1577.91	761.548	1688.9	1837.82	1817.04	1941.81
Ogdh	82447.5	74940.1	75809.9	75885.1	80761	79554.1	79260.6	78811	91177.4	89195	103852	111324	74319.4	75392.4	84084.4	85344.2	87920.3	92283.5	104672	103401	75368	69747.1	70577.8	69884.7	76677	74505.9	99042.3	96417.6	92174.5	86741.9
Stoml2	12107.5	13700.3	13128.3	14836	13588.4	15699.7	13738.9	14981.7	13003.4	13624	13478.2	13594	11360.6	13355.5	9045.63	13716.6	11828.6	13117.1	12798.5	15168.8	14189.6	13120	10674.5	10504.4	12061.9	13108.6	11390.3	13304.9	12994.9	12142.1
Pdxp	5806.11	4779.15	5588.62	4162.68	5057.72	5902.63	4944.09	5372.32	5866.28	4524.23	4305.65	5344.57	4684.1	4667.52	5187.39	3753.62	4383.33	5272.75	4644.86	3941.92	5411.75	4744.49	4704.01	5442.65	5468.3	5281.46	5185.77	6082.89	5120.61	5040.49
Luc7l	626.748	1063.54	1306.48	1125.06	735.841	722.794	390.846	1115.64	992.645	717.132	1129.33	1343.67	1359.48	792.344	1030.76	541.617	761.867	516.233	1207.6	667.393	1150.37	1346.66	730.381	392.475	842.773	604.728	530.158	525.814	597.487	868.566
Specc1	4199.78	4767.35	4244.37	4595.17	3738.04	4671.92	4639.29	5004.52	4329.34	3764.22	4267.24	3444.74	3953.53	4493.84	5363.41	5903.41	6148.75	5769.75	4838.13	5669.21	5449.72	6367.07	5111.38	5392.59	4852.38	5857.73	5131.21	5516.39	5427.67	5961.83
Tjp2	32894.3	32032.7	33855	34433.3	35670.6	34352.3	32767.9	32485.7	35330	35721	33069.8	33576	29963.4	34367.8	32344.9	30550.7	31096	28526.1	27688.2	27085.2	30006.5	31139.7	33948.5	32652.1	30847.9	31191.9	29336.6	27867.1	29601.2	29978.2
Lamc1	399108	373709	413438	392928	366246	380208	376205	367602	400944	380416	423463	437927	357793	367328	488572	467383	477142	471403	439009	441342	466274	444433	507538	484482	454879	437750	469366	454037	438669	440671
Stim1	8251.38	7897.33	6249.25	7921.13	7372.84	8352.69	6952.79	8281.32	8370.75	8734.15	8569.59	9315.39	8233.29	6532.44	7431.13	8828.15	8010.78	7537.31	9454.81	11503.4	7235.01	8394.68	6046.17	6028.05	6644.2	7466.49	8884.13	9757.06	7278.15	9395.46
G6pdx	45382.1	46525.4	43699.5	45305.2	40634.3	41982.3	46559.9	42465.4	39731.6	40966.9	48978.1	47904.9	42740.2	48293	60899.4	59741.7	50657.3	54956	56135	53891.6	52975.7	57965.5	52639.2	56895.3	56663.9	55135	59577.7	56160.5	60424.1	57678.4
Nectin2	2389.17	2147.28	2254.42	1831.27	3152.31	2312.33	2152.46	2174.79	2315.17	1995.05	2290.45	2016.73	1691.98	2583.07	1754.81	1784.4	1451.51	1913.34	1862.13	1702.3	2552.38	2462.44	1780.44	2442.75	2124.5	1696.11	1854.37	1839.57	2372.94	2292.51
Pole3	2430.97	2135.1	1956.55	1704.14	2559.52	2461	2063.8	2099.82	1883.07	2438.71	2124.25	2427.07	2052.21	2673.91	991.158	1855.65	NA	NA	NA	NA	NA	1935.62	1312.23	1466.22	1666.74	1299.02	1196.29	1336.38	NA	1296.65
Tacc1	14877	16220.4	17525.5	18243.4	18837.3	17470.8	16087	16836.2	17982.9	17952.7	17102.8	17562.6	13931.4	15730.1	18915.8	19443.3	20030.4	20549.9	16490.4	17814.9	19620.7	23230.9	19193.3	16989.9	19816.5	19660.8	16789.6	18902.7	17945.4	16785.8
Cnot10	915.075	1226.1	1182.45	760.199	1105.02	1314.91	1056.04	1294.64	1228.41	962.949	1019.2	1054.82	817.909	1157.3	983.502	749.947	754.872	793.65	731.833	689.248	627.094	568.815	380.338	734.877	665.936	588.7	774.482	607.313	1281.8	442.525
Ubqln1	3540.43	3350.69	4945.29	2168.59	4582.9	2451.12	3833.74	2687.76	3121.72	3648.58	4369.94	3353.61	4584.92	5161.21	4662.25	4166.2	4661.44	3511.29	4520.89	5207	4767.02	4295.82	5683.76	4672.52	4505.13	4094.09	6617.75	5364.11	5979.27	4307.34
Exoc6	1190.32	1342.62	1375.02	1434.74	923.142	1401.01	1099.66	1459.5	1322.43	1235.63	1059.15	1047.88	813.41	1123.26	1230.67	1258.11	934.002	704.525	903.708	1195.75	566.419	1220.56	1320.99	1265.92	1625.49	1448.54	1153.9	1160.23	1130.77	1437.82
Ppp4r3a;Ppp4r3b	1723.42	1358.84	1641.96	2350.19	1032.57	1568.97	1468.7	1652.86	1703.01	1290.11	1673.63	1536.94	900.261	1329.6	774.591	1158.92	651.434	720.339	944.943	1179.53	217.23	1120.94	1349.23	1309.47	563.376	965.79	1410.98	688.56	1131.68	NA
Mmp25	475.669	163.691	481.233	678.924	728.717	959.341	551.36	418.716	558.562	634.462	466.279	484.544	NA	647.915	NA	NA	437.512	NA	176.202	NA	466.869	NA	NA	NA	NA	229.168	NA	NA	172.305	NA
Edf1	11171.1	8678.74	11853.8	11008.8	9669.96	10404.5	9220.8	7459.46	10794.1	8963.61	7336.95	6344.52	6632.97	7642.46	8819.37	7710.28	8837.8	7926.64	6400.04	7840.54	9652.1	8257.48	6267.1	6781.83	10088.3	8901.77	7663.65	8892.89	9887.15	9252.38
Sult4a1	10850.1	9804.34	9992.96	9789.53	7906.53	7350.12	9869.77	9048.12	9436.11	8925.33	9289.67	9970.97	9022.88	9516.54	13796.2	13664.2	11612.1	11669.8	11408.8	11379.2	12989.6	12215	15071.8	13924.1	12859	14714.8	11332.4	11917.8	12238.1	11597.1
Sec23b	3528.71	2868.65	3214.38	3291.02	3603.47	3941.49	3524.9	3848.97	3905.27	3815.88	3816.15	3459.18	3646.36	3844.27	2114.37	2756.04	2260.52	2472.94	2518.38	2466.77	2686.15	2718.11	2241.84	2620.81	2324.63	2453.57	1660.07	2756.46	2432.06	2364.78
Nol9	751.031	1566.18	1125.7	1346.93	1235.73	1472.2	1174.47	1312.49	818.65	1283.28	705.992	552.276	1227.57	1272.48	930.588	1155.65	NA	841.49	973.88	834.295	693.924	NA	1602.45	928.616	NA	NA	610.726	812.798	821.51	735.96
Cep170	6805.13	6626.71	6805.25	6764.7	6683.52	6775.4	6067.35	6870.92	6758.68	6578.32	5613.96	6001.86	6475.17	6251.75	6287.11	6413.05	6177.33	6384.93	6428.9	6011.91	5504.71	6847.63	6524.47	6303.67	6314.75	6008.04	6010.88	5347.46	6877.27	5926.74
Apeh	23450.8	20852.3	25743.1	22936.7	17928.3	17828.9	22185.5	20548.8	19760.8	17151.1	21376.1	21446.4	20574.5	19200.6	25842.9	23487.9	18088.8	16695.6	18337.2	19310	19283.4	16669.7	19587.6	19138.9	24032.1	23199	23249.5	23616.3	22823.1	18987.1
Nploc4	14401.4	15878	16288.3	14883.3	13692.5	15371	15059.4	15781.4	15394	15919.7	15835.6	15636.6	13055.4	15440.6	13509.9	15518.2	12040.3	14817.1	14718.2	13314.9	14045.9	11773.7	13802.8	13903.7	12944.1	13350.3	12606.9	14758.1	14293.8	15397
Mtap	42355.1	39651.4	39779.2	33329.6	39313.7	39355.3	36066.3	35038.7	37652.8	39864.6	37540.8	34018	35603.3	36137.9	49113.3	49657	42721.7	36854.4	43005.9	41988	41199.5	41805.6	47304.4	43585.5	44626.4	44001.4	44464.9	49755.6	46426.3	45184.1
Fech	6757.4	7019.27	7139.1	6144.95	6673.06	6134.24	7337.76	6536.76	7140.13	6132.05	6534.63	7818.63	8756.83	6769.68	9233.4	9721.11	7759.96	9577.05	9567.19	10151.1	7538.62	8356.81	9613.3	7714.15	8115.57	8780.47	10838.3	9753.18	8368.69	8491.79
Pls3	54107.8	55872.4	48269.4	44823.8	45920.7	48274.7	45453.4	43783.9	48588.6	48357.7	50470.9	48946.2	38528.8	50467.9	77746.4	68604.3	72153.1	66490.4	67926.7	65117.2	66178.8	69524.1	70722.2	78036.7	71746.2	77575	70881.1	66730.4	72126.8	73669.4
Armt1	3820.43	3792.51	4044.5	3861.16	4007.14	3685.41	3869.25	3843.45	4464.37	3659.2	3562.74	4011.92	3688.17	3530.28	4330.27	4954.85	4669.44	4643.76	5259.31	4758.11	4363.92	4604.71	2932.35	4710.22	4551.15	4475.72	4258.8	6874.28	5264.21	4837.88
Gldn	4054.08	4304.72	3991.87	3739.67	4255.68	3816.66	3959.02	4134.15	3918.31	3816.14	3677.95	3591.34	3406.66	3750.08	3494.2	2963.11	2390.3	3134.34	2431.92	2226.99	3101.06	2569.64	3821.63	3937.81	3463.93	3591.59	2081.25	2755.98	3534.85	2304.67
Rtn3	121660	103438	110326	112814	119589	116265	103825	117325	119335	128160	115172	107630	113484	114183	124802	138269	120776	120662	113760	111905	123515	135118	128429	133254	129916	129134	111954	126617	116924	129325
Gps1	23823.6	22853	23445.4	23492.6	23154.9	23067.1	22318.1	23090.8	21710.5	22167.9	22250.1	23568.1	18626.8	19936.4	23427.8	25694.6	21593.9	23094.9	21422.4	23808.2	21630.2	22005.9	20889.8	25190.6	23826.7	23704.8	23304.8	25266.4	23098.7	22354.7
Mvd	52793.7	60900.8	67145.9	61424.8	60530.6	60850.4	55310.9	59377.3	60651.7	58668.2	46246.4	47915.9	55725.6	55387.7	20689.7	18539	17551.7	17796.2	14916.8	16509.5	16448.4	18264.6	16585.7	18938.8	19348.7	18694.8	20058.6	18719.9	14791.3	16805.1
Dus3l	2815.72	2892.2	3795.25	3574.87	2552.98	3355.49	3383.25	3020.78	3033.89	3515.27	2340.56	2314.77	2040.24	2038.71	1515.05	3078.27	1884.49	1442.42	1536.1	3933.6	1814.05	1411.14	3013.56	2903.55	1833.82	2277.95	1876.76	2679.09	1836.61	2658.51
Dmap1	1388.38	963.227	1167.77	1100	1532.07	1107.69	961.582	1448.36	1325.23	1176.71	1297.95	1112.93	1293.86	830.49	NA	757.007	889.709	714.307	1114.37	1134.32	1003.74	886.498	833.761	600.313	1080.69	1013.84	1061.76	739.19	644.719	1508.54
Sars2	2554.71	1744.3	1779.86	2500.54	2336.85	1975	2009.06	2280.1	2455.42	2331.54	2476.87	1749.9	1898.16	2222.6	1435.55	1989.32	1603.32	2358	1684.82	2139.4	1512.88	1214.98	1617.05	1393.65	1758.93	2147.03	1863.12	2058.3	1548.47	1841.37
Krt10	114053	23481.7	15116	14640.5	26107.6	26178.5	36127.1	25863.1	223995	229932	28334.2	24719.7	79142.9	24449.6	39677.3	35375.2	47364.7	36390.4	19753.3	19053.4	41477.6	26920.3	50033.5	29827.1	87517.7	31312	37952.4	32813	31513.4	20217.1
Sec23a	25724.8	24133.8	24135.8	24657.8	26258.1	26552.5	25251.4	24047.5	26639.5	26740.6	25055.8	25577.3	24191.1	25135.2	16177.8	16563.4	16136.9	14346.8	15431.3	13149	16438.6	16322.3	16610.6	16971	14721.3	16327.4	16119.8	15662.4	16769.1	16695.4
Seh1l	2670.98	3060.05	2683.01	3059.15	3171.95	2344.31	2325.73	2544.38	3383.59	2864.12	2345.16	2544.91	2622.34	2516.54	1557.6	1987.66	2384.84	2319.57	2160.56	2066.4	1853.63	2163.37	2026.02	2205.14	2231.25	2142.72	1228.01	1942.74	2378.67	2262.77
Ppfia3	11119.1	13093	12451.3	14583.3	12878	14216.9	11914.3	13662.1	13196.1	15193.2	12119.7	13313.9	15160.9	10522.2	15543.4	18756.1	19602.3	17854.1	16842.8	18118.4	17312.5	19845.7	17412.8	19853	16459.8	18440.2	16520.4	15617.2	15985.5	13345.3
Llgl1	5431.15	5063.48	5127.66	5689.71	5473.86	4755.37	5330.32	5542.94	5567.2	5399.13	6011.06	5655.91	5315.47	5000.08	6479.29	5556.58	5182.29	6175.4	6044	4929.18	5581.43	6523.05	6420.94	6978.95	6203.28	6240.73	4921.12	5972.04	5778.16	6363.8
Epb41l1	6832.51	7617.81	8032.85	7801.37	7774.99	6960.01	6664.29	7565.99	7496.15	6556.68	7059.06	6397.53	6837.89	7752.8	8425.2	9348.83	9059.02	8896.78	8174.86	9877.97	10974	9874.22	8948.93	8849.59	8404.49	10070.4	8996.49	9631.44	10983.2	9457.8
Kif5a	16393.4	15491.2	18139.5	18395.4	17619.8	17472.1	17187.2	16152.5	18143.9	16970.1	16742	16306.2	14790.1	15878	16140.4	20389.1	17587.3	17965.3	15520.3	16846.7	17225.5	17594.6	18026.6	20778.6	18618.6	19640	15216.2	16467.7	17314.3	16382.3
Nudc	41013.1	37294.8	37258.2	34772.4	34650.3	36891.5	32280.1	35034.2	36027.7	34999.2	35207.6	35879.4	29962.7	30768	34920.9	37471.8	33808.7	36672.5	35395.2	31055.9	41375.8	34479.6	40228.7	36188.6	38189.2	36715.3	36048.5	33778.5	36011.8	36037.1
Mecp2	12425.1	13156.6	11653.3	13650.2	12733.5	11660.2	11358.9	11301	12334.3	12735.6	12221.3	11053.9	10610.3	11706.7	16064.6	18807.9	15140.9	15597.6	15566.3	18815.7	15354.5	15691.4	15141.3	16518.3	18586.2	15058.3	17169.3	18280.6	19386.6	19291.9
Fam114a2	5696.23	6363.69	5366.82	5613.99	5052.12	5481.86	5400.74	5012.37	4159.48	5242.44	4370.33	5150.53	4449	4933.37	5888.87	6678.6	5821.09	5551.92	6860.74	6888.13	5683.13	5292.12	7167.9	5821.43	6899.53	5966.19	6437.38	7239.9	6278.88	6998.23
Cobll1	8887.13	9435.97	8881.84	8366.39	9445.05	8882.92	7475.33	7856.09	8421.15	9257.04	7925.32	7402.15	8851.61	8146.62	9155.37	9419.74	9398.33	11072.9	8682.19	8774.03	9175.67	9134.96	9530.81	9436.46	8546.07	9992.58	8851.6	9152.72	10250.4	8789.32
Snx3	31473.8	31584	26826.1	31752.4	27371.6	32619	28988.3	33014.6	26411.6	34062.7	27386.3	34964.4	22888.1	27266.8	27353.2	27036	22517.6	22615.1	28449.9	27790.2	28107.4	28628.1	24599.2	26873.5	25154	22232.5	23283.4	23729.4	22237.1	27676.5
Rab4b	13713.5	13634.8	13439.2	13764.7	13105.9	12562.2	13572.1	13549	13619.8	13830.4	12676.5	13673.5	13046.1	11032.3	9704.79	10500.3	10108.9	9617.59	10503	11016	11142.8	9994.74	11284.7	10160.8	11622.5	10990.9	8732.01	9867.66	8555.75	10707.1
Nrcam	6032.85	6129.85	5901.89	6464.78	5950.81	7770.77	4759.18	5535.91	6437.25	6527.04	6151.5	5533.1	6621.89	5928.64	5511.72	6509.66	4926.9	4609.2	4205	5080.83	5965.3	5885.79	6207.19	5545.57	4589.49	5703.48	4937.19	5815.63	6059.18	5743.87
Uba3	12820.5	11586.1	11268.8	12902.6	10721.1	11598.3	9608.43	9970.57	11321.2	11380.1	10649.5	10875.6	12651.2	10660.8	10764.9	10819	9275.23	10725.4	10844.6	10286.6	9071.67	9753.17	12447.5	10377.8	11362.2	11589.4	10787.8	11678	10348.1	11825.7
Ppfibp2	567.059	483.682	525.177	675.236	845.361	731.154	795.667	838.996	736.469	508.605	686.211	659.349	701.312	840.587	461.344	899.475	1038.98	1088.06	1256.63	909.363	951.378	1311	1053.31	1186.26	854.241	925.325	729.061	834.455	655.379	857.396
F5	380.995	727.776	1007.4	878.77	953.26	194.8	621.086	787.888	467.025	890.647	936.926	NA	673.039	655.196	643.087	716.478	NA	NA	NA	NA	NA	NA	NA	492.263	864.985	770.408	777.667	NA	NA	431.229
Tdrd3	2766.94	2753.36	2633.42	2671.88	2632.2	3361.31	3166.27	2400.12	2242.41	2620.71	2307.06	2517.27	3706.73	2603.02	1964.65	1771.29	2056.38	1774.21	1888.08	1889.38	1580.09	1812.17	1382.35	1869.3	1811.67	2289.84	1788.47	2050.28	1892.04	2424.08
Dynlrb1	21757.1	15969.4	21054	20207	18734.6	16699.9	22577.8	16328.5	22542.8	20726.9	24271.6	22865.9	24023.6	21035.4	22956.7	23104.7	32819	18507.3	25105.2	19720.5	23540.8	18723.6	28890.7	27506	22356.4	27073.7	25779.6	25779	24618.6	26465.3
Dhrs7c	NA	NA	NA	NA	1067.2	1088.21	NA	NA	2287.61	2269.74	3483.9	3246.84	NA	NA	1464.59	1586.33	1454.83	893.993	3868.02	5174.45	NA	452.29	NA	NA	1762.09	2082.81	11517.1	11271.8	7078.41	5832.76
Rbm19	NA	NA	NA	NA	395.113	NA	NA	NA	NA	204.14	NA	218.725	NA	NA	NA	NA	64.5598	121.691	NA	NA	NA	NA	NA	NA	NA	NA	NA	NA	NA	NA
Clip3	2182.9	1206.45	1667.36	1849.16	1725.89	2127.92	1851.93	1796.41	1731.3	2168.31	1831.93	2095.54	1812.56	1730.55	1363.03	1744.36	1982.05	2382.89	1445.38	1546.95	1324.94	1838.42	2065.47	1786.94	1733.87	1313.79	1415.69	1613.08	1644.14	1417.12
Pkhd1l1	2827.25	NA	NA	NA	NA	NA	NA	NA	NA	NA	NA	NA	NA	NA	NA	NA	NA	NA	NA	NA	NA	NA	2083.63	3153.66	2622.03	NA	NA	NA	NA	NA
Epb41l2	338076	330094	365620	349956	319500	322325	321326	316889	344590	325259	327494	340979	311592	322869	423658	396973	379938	370101	378832	343355	385972	395066	402678	405486	428333	401058	398321	361792	385893	400406
Cemip2	7066.65	7343.09	7089.52	7325.61	8267.37	7697.06	7328.75	6299.8	7945.05	7920.42	6710.87	6884.73	7501.7	7529.21	6905.68	7745.47	6776.24	6085.8	7069.93	7114.24	6509.47	5881.74	6479.7	6704.99	6571.38	6824.69	6474.01	6048.36	6717.54	6885.17
Kcnab1	2827.18	2250.5	2597.26	1684.24	2693.05	2022.32	3712.98	2478.09	2405.97	2891.63	2615.84	1677.67	1992.28	1687.36	3104.06	2825.67	2428.37	3140.06	1673.83	4000.13	3509.95	3357.31	2619.01	2347.72	2472.39	3313.6	2829.43	3962.97	1197.34	2829.04
Sf3b3	12157.7	11843.5	10903	11411.6	10526.2	11403.3	11333.8	10890.5	10755	11263.8	10148.6	10908.3	10842.7	10653.5	7518.36	7328.46	7171.48	7571.26	8233.51	7561.46	7930.05	7378.24	6746.08	7283.71	7251.34	8195.4	7127.81	7458.22	8515.55	7798.59
Uqcrfs1	55423.9	54268.5	52148.7	52293.9	60674.3	61937.2	47556.7	49559.5	60765.7	59973.1	59747.4	63894.4	44608.4	40640.9	52933.1	55038.3	64449.2	64848.5	76232.1	83841.1	46804.7	55345.1	40204.6	46385.6	54512.4	53596.2	67368.5	70210.4	56194.6	62075.3
Ncoa1	769.702	1114.21	1328.08	623.919	1325.03	909.414	602.234	1216.73	622.229	NA	1158.67	742.314	963.331	818.247	NA	490.986	977.339	688.918	1014.58	NA	1245.2	772.608	NA	463.802	927.964	NA	868.806	NA	NA	1146.25
Bzw1	16987.4	16621.7	16847.2	14783.7	17375	16673.8	16942.2	16327.7	18464	17794.6	14688.2	15754.4	13942.8	18441.9	11865.3	11855.5	12193.3	11976.3	12074.7	11204.4	12737.5	12272	11934.5	12413	11607.7	11775.5	10308.5	10729.3	11331.8	12354.2
Nf1	6204.87	6296.61	6516.35	6552.4	6669.05	6904.16	6678.69	7128.6	6910.91	6953.08	6314.1	6788.13	6165.81	6928.46	5174.5	5951.35	5190.49	6367.22	4727.82	5373.29	5821.5	6324.42	5883.19	6123.85	5807.53	6103.4	5115.16	5076.98	5555.1	5287.9
Thtpa	7040.46	8054.5	7057.89	7104.34	7880.52	7719.93	6404.87	6703.95	7810.7	7632.81	7702.5	7327.72	6268.32	7583.1	7425.37	8076.15	6997.93	7375.7	8925.48	8609.95	7745.5	8328.67	7061.64	9028.02	8844.88	8684.13	8891.56	9555.6	9437.42	9153.7
Ntan1	2033.53	1621.45	2130.96	1551.26	1806.55	2203.35	1646.22	1742.26	1285.08	1405.96	2567.22	2276.07	2468.13	2297.74	1721.72	1453.46	1710.08	1408.02	1838.39	1350.37	2080.44	1479.25	2507.71	1671.53	1485.36	1498.19	1904.45	1857.63	1329.63	1824.61
Ctnna1	36545.5	36039.3	38657.9	38974.5	35198.6	35045.4	39186.2	39278.7	37694.8	36754.3	37232.8	37913.9	36266.4	39071.4	39098.8	38503.1	41078.1	41511.6	36420.4	35806.9	38539.5	39489.2	37947.3	40219.1	34729.4	35798	37179.3	36836.6	36479.1	39180.3
Chdh	9743.11	10123.9	11018.8	10239.7	10278.9	10746.8	11734.8	10387.2	10983	9675.39	11057.9	9720.18	8214.81	11392.8	12457.6	12412	12287.8	11371.7	14101.2	11483.6	13073.1	13648.2	11958.7	12323.2	11442.8	12356.4	10362.8	9764.21	12268.7	11119.4
Gars1	77169.7	77305.6	73843.9	72427	70201.8	69797.4	74278.7	72840	78300.1	79335.5	74321	74589.2	68407.6	70802	92496.5	90267.5	87540.3	86339.4	86027.6	86950.9	90514.9	87473.6	84184.1	88730.6	86135.4	89906.4	86714.8	87655.1	89568	89980.5
Apoa4	159892	148513	105800	101417	113248	105565	109307	104140	104220	102080	187924	192906	136706	146691	114029	102634	62541.5	60318.2	96636.4	94143	104898	101013	168462	170226	235300	220669	194206	181679	177373	176919
Lhpp	4897.77	3921.23	4566.53	4974.5	5383.08	5465.98	4547.72	4609.78	5965.73	3678.66	3066.54	4185.8	4644.57	2644.04	3268.21	3018.74	1924.51	2414.06	3499.93	2886.2	1903.14	2155.77	1727.22	3002.12	2336.94	2665.64	2116.54	3562.1	3016.69	3266.2
Kcnab2	20173	17164.7	20724.8	20562.8	21095.1	18844.9	16737.5	19343	18813.9	19683.7	18154.6	19609.7	21146.6	21288.1	28035.4	30198.7	26932	25749.1	22577.9	23040.8	23993.7	27008.9	26003.4	25627.9	24681.5	28739.1	25002.5	23801.5	25163.6	22327.2
Fnta	27874	26959	24056.7	27189.8	24859.4	27177.3	25927.1	24376.5	23416.4	24025.8	22654.8	22502.8	25143.1	20308.6	20399.3	24035.1	18755.3	15717	20253	19804.1	18379.8	18567.1	22911.8	24206.6	21994.1	23836.2	18834.2	18446.2	23027.1	22298.1
Cep97	2715.57	2973.4	2704.67	3101.51	3596.2	3602.27	3683.03	3784.34	3389.29	3534.46	2432.79	2008.66	4275.66	3311.55	2186.3	3222.56	2996.25	2985.38	2418.64	3124.06	2947.71	2604.22	3408.39	2580.09	2536.87	2877.43	2925.38	2773.09	2236.93	2577.1
Dnm3	25298.7	26111.5	27532.8	28080.7	28594.4	27119.8	28449.5	30034.2	30129.6	28937.3	28966.6	28347.3	27533.1	29349.7	43221	42728.3	37171.1	38759.2	37835.4	37987	41676.6	42745.4	40239.4	42840.6	39524.9	38499.6	34279.4	36030.8	36740.6	37986.5
Eif3e	26698	26812.7	28125.6	24926.3	27678.3	25039.3	31279.4	29766.4	28174.1	28303	27609.2	27906.7	25107.1	28494.5	18531.8	18911.2	19721.4	19025.8	18135.1	18519.1	19043.1	18201.7	19074.4	17113.4	19146	19521.9	18720.5	20031.9	19243.6	17507.1
Camk1;Camk1d	9834.9	9514.08	7098.28	7743.22	9575.39	8451.46	7639.52	7680.79	9746.4	8357.05	8389.44	5536.99	8021.85	9364.61	11882.2	12056.4	13486	12439.8	11346	11855	9082.96	11188	15218.5	13338.5	10759.2	13744.1	10625.9	10286.5	14503.5	12173.3
Pea15	129742	123931	133669	113482	78052.4	72454.5	97954.8	79982.6	133553	113298	112704	103436	48474.5	35403.9	104271	89883	75486.7	68278.8	86992.6	71613.4	58826.2	70833.8	124566	97115.4	119376	117100	99561.2	63247.9	100173	88490.3
U2af1	24137.9	24337.1	21799.9	27484.3	26221	31163.1	28217.6	27541.4	26605.2	29936.5	29245.6	30288.2	24166.6	30239.7	18938.2	18213.4	21597.9	20609.1	13304.2	22485.1	23290.6	22340.6	14703.4	16872.4	18564.5	16038.8	20789.4	18735.4	19977.3	17449.2
Psmd6	17186.7	14843.6	17339.9	16353	18196	14066.1	15157.1	15213.1	18112.3	15216.4	17685.5	15509.6	14186	12666.6	10878.6	14059.1	11752.4	10057.2	12212.7	10003.1	10451.9	8602.94	11839.6	11043.9	12030	12449.2	12346.1	13016	11561	11115
Enpp1	4262.35	4558.52	4766.81	3868.57	3948.3	4254.34	4572.03	4324.66	4383.49	4351.15	4554.47	5146.61	3798.57	3693.42	3546.92	4415.54	4389.32	4775.61	3716.42	4019.72	4073.04	4462.73	5409.51	4862.35	4424.95	6151.58	4478.8	3669.44	4257.04	4438.54
Enpp3	2351.63	2668.01	1984.75	2372.17	2500.89	2171.25	3298.44	2867.87	2750.09	2846.96	2795.15	3087.66	3048.9	2458.86	3116.62	3864.83	3350.57	1842.32	3813.34	3586.23	3360.4	2937.16	2566.61	2015.84	2917.98	2623.55	2828.04	3512.18	3534.55	4682.62
Ripk1	3730.23	4430.03	3638.69	4022.15	3666.81	3780.04	3599.62	3982.2	3756.02	3903.08	4364.74	3777.95	4433.47	4099.25	2852.49	3212.87	2811.42	2430.2	2343.87	3531.9	3311.66	3073.19	3174.12	2671.8	1037.84	2510.06	2736.77	3466.78	2224.93	2990.94
Hace1	911.8	1687.84	1536.65	1721.36	829.293	1489.22	2431.96	1343.43	972.373	820.195	1233.88	883.883	1527.3	1065.9	1117.36	1560.22	1446.31	1284.22	NA	1099.8	727.738	1864.93	915.897	1514.06	1521.52	1557.75	1272.64	1357.97	1039.3	1415.36
Ndufs7	16307.3	15969.3	17056.1	15815.1	19961.1	15371.9	18209.1	15883.8	19553.8	18073.7	23832.9	21368.3	20582.7	17588.3	20888.3	19315.7	23374.1	21717.1	26235	24679.3	21342.8	16833.1	18545.9	14062.6	17387	15192.8	26269	25572.8	19783.5	18674.6
Rab34	14681.3	16536.3	14412	13523.5	15506.5	14355.9	14878.5	14649.4	14364.8	11995.1	12342.8	12452.6	15233.7	14079.5	10737.5	10301.9	9958.04	7767.97	9987.72	9782.53	9826.32	10086.4	11427.1	10315.2	10057.8	10807.4	11017	9071.43	9871.91	9290.39
Wdfy3	2042.55	2460.35	2373.84	2264.52	2788.88	2928.84	2582.44	2866.99	2357.05	2452.95	2189.52	2652.78	2565.54	2614.89	1838.85	2615.64	2220.54	2237.73	2051.07	2017.11	2249.14	2850.71	2376.25	2179.83	2109.68	2420.95	1930.9	2822.51	2184.31	2143.88
Echs1	85078.6	75340.3	82367.1	67611.4	72284.7	68225.5	76223.6	73645.6	81573.4	73106.7	84999.6	82827.8	66900.3	75254.3	78178.5	72965.6	81933.2	70732.4	85174.9	74142.7	67719.4	71142.4	68778.9	67249.4	71881.6	67570.7	84182	73813.8	82729.5	77094.5
Rdx	52785.6	49772.9	53034.7	53850.8	48585.9	54480.1	49893.6	49074.8	53431.8	54983.5	49941.1	56638.8	45093.5	46518.3	53494.1	54407.9	50720.8	47340.2	51178.9	49604.1	47507.3	43597.9	46711.9	46681.8	49713.6	54761.4	50470.8	51832.9	53269.5	51424.6
Scrib	8283.32	8658.67	8421.78	8315.21	8755.6	8699.54	8558.44	9536.55	9021.05	9057.8	7944.99	8841.03	8159.74	9037.07	7690.68	7920.5	7847.5	7983.81	6621.9	6960.97	7359.25	8793.81	6906.66	7458.11	7212.27	7621.92	6522.49	7131.64	6666.66	6375.78
Cct5	45610.4	46550	48631.5	43348.6	44591.3	45289.2	49732.1	47780.7	48089.7	43585.5	46896.5	49276	50094.1	48541.4	48933.8	43644.6	43417.3	45163.2	44985.2	45319.2	43068.8	44045.3	43206.8	44902.5	45441	46916	48169.2	46452.3	45720	47084.8
Cct4	76289	74065.8	74828.4	76891.4	77855.3	80689.8	80844	78897.3	79628.2	78720.6	79496.8	82310.1	78541.5	81957.6	71178.6	72543.5	68685.5	69886.6	68070.2	72452.9	75411.5	74826.3	67245.2	72792.3	70762.9	70670.4	75636.9	71696.1	68171.6	71023
Ocrl	1832.05	1996.19	1700.35	1822.47	1775.04	1732.74	1910.73	1802.7	1695.65	1987.92	1932.55	1745.54	2547.46	1503.94	1726.33	1887.27	2308.85	1700.38	1589.93	1751.17	1861.58	1846.58	1845.23	2155.47	2172.59	2336.7	2358.1	1836.45	1883.88	2288.28
Ttc28	1005.59	676.652	818.105	983.358	787.79	811.827	698.206	1153.84	853.704	770.814	673.548	833.257	837.722	734.145	935.949	931.993	664.404	763.072	653.518	633.092	724.861	1190.65	614.623	734.431	434.436	800.711	418.103	882.21	286.825	823.882
Plcd1	22496.7	22597.7	20206.9	20244.1	22106.3	21559.6	20935.3	19341.7	23990.5	23751.2	21554.8	22159	24100.2	23330.4	17586.2	16899.7	17937.5	17595	18159.7	18973	17028.7	17474.2	17573.5	19373.8	17790.7	18354.9	16819.2	17389.3	18052.8	18061.2
Cntf	120013	115431	103448	109795	115022	115923	104044	97980.6	121376	124517	124271	127319	111150	113643	158161	160972	177049	172804	154755	162255	175332	173704	172668	180548	172992	164776	158108	163098	157356	171318
Mkrn2	2971.73	2967.72	2233.38	2779.69	3849.54	3492.42	2809.82	2233.42	3704.78	3097.96	4573.92	3057.45	3547.89	3003.55	3210.61	2247.47	2925.03	2337.85	2388.07	2999.78	2871.1	1848.22	4329.95	3329.06	2927.71	2767.03	1966.81	2669.3	3422.27	2459.38
Tardbp	33554.5	30095.4	30308.7	34979.1	33415.5	29685.7	32027.4	32980.1	34296.9	32948.4	30944.7	32555.5	31451.2	33927.5	21057.3	21224.4	21534.8	23324.3	21657.3	19565.7	21833.5	24255.7	19380.1	23309.1	23987.7	19319.2	23176.2	21840.9	20342.8	21875.6
Ppa2	23912.1	24022.8	22493.3	21515.7	22513.7	23830.1	21233.2	20414.2	25649.1	27486.6	21624.8	21742.2	22763.5	26184.3	24249.8	24116.5	22325	20662.3	22148.7	23360.6	21626.8	18794.5	24977.8	23942.8	24566.7	23149	22178.3	22541.3	21566.9	22317.4
Pcbp3	1589.64	1452.19	1687.38	1553.8	1518.95	2163.88	1950.51	1894.28	1651.92	1879.03	1759.63	1917.84	2074.26	994.265	1302.52	2188.01	1906.95	1770.62	1754.44	1894.73	1609.76	2013.23	1971.54	2650.86	2413.88	2207.19	1491.78	2198.92	2063.7	1806.27
Pcbp1;Pcbp2	2763.59	2273.85	1124.99	882.72	2671.75	2564.55	1554.73	1734.04	1945.26	2244.69	1604.66	1352.2	1414.3	2169.42	815.48	712.164	807.974	NA	928.142	NA	1234.12	NA	1027.93	971.591	1041.75	1141.97	NA	1374.17	951.326	NA
Pcbp1	78554.6	73512.1	73528.1	60327.3	67634.7	70283.8	78706.7	80583.8	79742.2	70455	81458.1	75844	77845.3	94408.4	69962.6	64658.6	66299.9	70233.8	64653	61269.5	65000.9	65709.6	70494.7	62758.3	68692.4	64386	79783.6	66884.3	62309	68925.9
Phgdh	143928	134635	146685	138094	137660	136726	144825	144783	142703	138375	146170	151177	163317	155962	117690	106930	118976	113619	107681	106978	105088	109146	108774	111047	105445	97140.7	108143	105471	98062.9	101509
Ptges	3919.37	6069.46	3127.84	4425.51	3660.93	3511.19	4690.47	6667.35	2897.33	4399.43	4973.41	4385.94	3922	4534.95	3895.86	4948.3	2116.21	3621.7	3422.91	3111.59	4130.25	4584.57	4950.82	6116.28	5666.59	6104.23	6576.96	6481.04	5990	5719.66
Spon2	3819.28	2851.27	3042.44	3264.75	2585.92	3107.21	3365.4	3343.81	3020.61	2707.84	NA	3069.9	3373.49	2186.36	864.051	917.207	924.831	1419.54	1097.65	1023.94	1563.81	539.125	NA	2157.55	NA	962.651	773.779	1615.61	NA	897.425
Ipo7	25050.4	20820	22519.8	20240.3	24379.7	22295.7	23212.1	24515.4	23171.3	22226.3	25414.4	22346	23840.7	23317.4	18329	20581.7	18471.6	18133.8	17386.1	16938	15030.3	15194.1	18756.8	18735.5	18832.8	18254.8	18912.3	19299.1	16323	15980.8
Epm2aip1	6670.98	6634.69	7153.94	7792.5	7497.56	6461.13	6752.74	7421.35	6687.3	6795.03	6723.8	6984.38	6728.78	7054.28	6719.72	7513.82	5238.4	6226.59	5833.16	7028.73	5776.61	5921.16	7016.5	6873.83	5740.67	7344.74	6772.59	7026.11	6638.07	6522.98
Hibch	16524.6	16867.5	15523.2	16040.7	15411.7	15136.8	14973.1	14773.7	16612	16079.1	18186.9	17558.9	17061.5	15889.4	16254.1	17989	19350.8	16322.4	19641.7	19008	17361.4	16598.6	16245.3	15929	15602.3	15611.2	18711.5	18088.4	18478.8	19177
Ndufb9	23460.9	22074.5	24900.4	23870.6	28198.3	27246.3	22974.9	25413.4	29075.2	26401.2	32222.4	31871.2	23752.2	22172.7	23601.3	28769.5	33118.3	28478.4	33119.2	35027.2	25433.8	23064.9	20584.1	21525.9	22687	21414.6	33508.9	35492.9	28295.4	30116.4
Qrsl1	2509.24	2198.51	1849.66	2477.75	2457.34	2211.48	1921.6	2049.88	2443.54	3262.08	2968.18	2206.31	2682.49	1824.79	1719.81	1932.64	1997.77	2409.33	2112.06	2021.69	2718.99	2279.81	1833.03	972.326	1148.02	2457.9	2128.45	2334.71	1240.25	1816.3
Yars1	32174.5	30747.8	31062.5	30203.3	31039.3	29882.3	31281.9	30497.8	32532.5	31833.3	32809.3	32402.3	25388.8	31086.3	34109	35771.9	37262.7	34031.2	35316.8	33804.2	35154	34733.8	32533.4	33517.5	34505.6	34354.5	33694.7	33989.1	33390.4	33941.3
Rdh14	10603.2	8772.41	7179.02	8950.7	10633.6	8712.72	10245.5	10941.4	6500.43	10319	7443.57	11045.1	6431.73	10735.6	8280.26	9616.81	7504.5	9109.56	7733.16	9257.43	5750.54	7770.42	5833.5	9699.32	6344.37	8873.7	11366.4	9167.91	6239.14	10982
Lgi3	17357.6	18548.3	18754.9	21016.1	19830.7	20399.4	18501.5	19175.8	19790.9	21152.5	20517.1	20791.7	21435.9	21372.8	30244.6	33290	29713.9	30740.5	26727.3	27410.2	27935.7	27219.2	26525.2	35134.2	33047.1	33397.3	31289.6	29326.9	28686.7	30467.1
Nrdc	7849.76	8152.24	7281.02	7065.13	7338.36	8183.7	6671.49	7382.5	7952.9	8502.15	7320.25	7582.85	8180.34	7373.17	3918.08	4758.36	4807.7	4011.21	4366.7	4017.35	4116.64	4286.74	4447.23	4912.95	4639.11	4808.45	4023.9	3994.77	4692.16	4199.72
Plekho2	13804.3	15465.7	11249.9	11113.8	11303.1	12099.4	11044.1	13605.4	11488.4	11501	13068.1	12177.7	11286.8	14561.2	15003.3	16382.5	17285.6	18224	13904	16492.1	16237.2	16998.3	12235.4	13171.6	14222.4	14135.7	17375.6	15661.4	14503.2	16352.1
Spag9	12996.4	12690.9	12843.5	12047.4	12105.7	12363.7	12460.4	12770.8	11990.2	12144	12053.4	12293.9	10451	11717.4	8610.1	8586.12	8475.37	7918.02	8391.14	8241.34	7141.85	8287.15	7737.42	8000.24	8595.81	8940.28	7685.25	8634.23	8901.77	7584.04
Nup93	24794.6	24956.3	22790.9	24986.6	25527	24661.7	25962.5	26336.3	25475.5	25358.4	24885.7	23675.3	22436.8	24791.7	20295.9	21481.9	21053.9	20372.6	21360.8	21973.8	21722.2	22028.9	19883.4	22493.9	21200.5	20873.4	18342.6	20894.9	21288.9	18889.6
Gdpd1	5884.44	5446.43	5707.97	6487.77	6036.57	6271.08	6159.6	6433.97	5365.43	6465.76	5780.4	6454.61	4683.79	6432.12	5138.14	5208.31	4112.01	4909.43	6107.17	5262.09	4360.35	5509.03	3990.22	3859.41	6020.24	4776.59	4812.14	4451.08	5652.04	4129.2
Clcc1	3507.91	3411.56	3567.24	3994.59	3689.43	4013.67	3597.08	4105.13	3363.92	3066.94	4208.61	3289.93	4187.92	3083.66	3450.17	3464	4498.56	3496.35	3201.63	4303	4174.83	3437.16	2983.77	2820.32	4098.17	3418.7	3289.39	3151.08	4438.46	4150.34
Antxr2	6616.59	5140.4	8054.73	6828.83	7184.97	7360.82	7769.97	7799.92	7113.98	6638.45	5794.13	7330.2	6279.35	6424.57	7090.19	7626.72	6433.89	6880.27	6906.88	6363.12	7493.17	7652.04	6990.45	6366.2	6827.46	6951.24	6681.54	5596.61	5951.21	7549.11
Fam3a	1548.5	900.566	1366.43	1169.7	1608.68	1444.07	1723.82	1773.06	1302.3	1826.71	1037.39	1518.53	1916.75	1765.73	NA	NA	NA	NA	188.902	NA	NA	444.982	915.222	NA	NA	NA	790.974	NA	1307.85	NA
Pccb	14416.1	15274.8	12981.2	13078	13969.3	12296.8	14382.7	14565.4	12916.6	13716.7	16514.4	15629.2	13770.9	14269.6	19179.6	18403.5	19148.5	19110.6	22240.6	19458.3	17170.2	15119.6	15212.6	14438.6	16524.4	15882.5	18877.8	19674.5	20873.4	21155.5
Uqcr10	28729.4	29405.3	33135.9	28747	38841.6	29162.2	39030.4	33114	36281.8	31526	34335.1	40628.4	26042.8	20699.1	34874.9	38158.2	38758.9	44781	56601.8	49574.5	36076.2	30884.9	30628.2	25888	39190.1	32618.6	33873	40197.2	27013.2	40299.4
Habp4	2139.3	1993.83	2230.03	2063.5	2112.12	NA	1750.15	2079.86	1915.26	1666.51	2330.3	1959.47	NA	1190.7	1449.97	1722.3	2251.96	1717.86	NA	1880.71	963.461	1425.3	3551.96	2143.33	1004.68	2044.81	1244.61	1228.78	NA	1941.5
Acly	162313	157124	175144	157989	160509	160593	165678	164532	178269	160733	172021	170449	189365	195018	175638	165177	174052	173701	168375	155426	185278	186989	180541	179636	183708	183312	181230	177573	174374	183608
Ttc26	1303.24	1934.2	1207.5	1928.13	1694.16	1967.65	1653.49	1615.63	1324.3	1923.62	1792.51	1240.91	1750.62	2167.16	1017.37	2069.09	1235.75	1606.32	902.382	1760.09	364.386	1666.62	1411.92	855.123	1004.7	991.068	1576.65	2205.4	1614	591.484
Tdrd7	1888.02	1941.38	1801.52	2268.17	2645.66	2431.23	1489.15	1985.63	2200.21	2233.54	2018.17	2132.16	2359.77	2286.11	1625.54	2442.18	1739.15	2170.34	2097.13	2130.19	2002.16	2674.23	2011.46	2019.6	2215.63	2187.08	1892.17	2051.41	1831.31	2455.07
Vcp	128924	122472	136143	130346	119924	119754	130183	130343	129225	131346	131956	136404	117398	127735	142123	137105	128714	126461	133506	134265	123761	122707	126423	132237	129369	125843	129400	127833	124179	131264
Rrp9	1575.36	626.568	1273.62	2309.98	1333.17	3105.45	1083.96	NA	1055.6	2992.77	1577.96	1387.73	NA	1676.88	1234.84	2741.36	1177.64	NA	598.547	1568.87	965.5	2295.24	NA	1001.94	791.387	531.441	NA	NA	992.096	1692.9
Ece1	3151.46	2898.67	3703.66	4457.27	3192.62	2929.2	3419.57	2150.71	3249.39	3692.56	2865.02	3362.66	2655.01	2266.46	2599.68	3782.53	3013.52	3313.11	3489.47	4115.25	3290.95	3103.46	1947.21	3163.48	2280.97	1808.15	2513.24	3301.75	3565.34	3900.53
Psma3	38041.7	45274.2	46353.5	41212.5	42966.5	36288.4	38668.3	37498.4	40853.8	36539.8	38871.9	37437	33573.9	35869.2	29966.7	34569.9	29804.4	29900.3	34611.4	31758.4	29241.2	29094.6	29657.7	31432.3	34249.2	32041.7	34089.6	33898.1	33542.4	32169
Aldh9a1	46176.8	45372.9	46968.3	41971.8	43837.4	44676.2	43128.3	42459.2	42047.7	42498.8	43770.3	42720.2	42892.3	46851.2	51955	49966.4	47698.3	46267.8	46748.4	44564.7	48444.5	47538.2	47706.5	48202.2	48422.3	44417	52008.9	50810.4	48839.2	46402.1
Zwint	NA	NA	NA	NA	NA	NA	16080.9	NA	NA	NA	NA	5278.72	NA	NA	NA	NA	NA	NA	6754.81	6464.72	NA	6000.58	NA	NA	NA	NA	NA	NA	NA	6506.88
Crtc3	3691.14	5693.26	4881.71	4248.47	5325.33	6192.83	4800.24	4802.71	5551.51	4353.92	4696.7	4642.75	5417.93	6037.92	3548.55	4078.96	4372.55	3294.79	4518.51	4044.12	3972.64	5065.19	3591.29	4535	5076.56	4313.36	4613.95	4782.54	5315.63	4924.25
Hcn1;Hcn2	2333.48	2718.3	2699.83	2316.12	3435.51	2855.12	2082.59	2361.98	2494.99	2595.32	NA	2931.55	NA	2711.49	3360.33	3182.37	3754.79	3625.33	3071.25	NA	2761.97	3059.21	3138.05	2776.17	2223.86	3761.99	2242.31	2854.55	2886.57	3534.25
Hsd17b7	19513	20480.2	24843.2	23946.3	24722.3	25579.4	22729.6	23617.1	24352	22403.5	23451.2	21334.5	20780.1	22671.4	9454.74	10229.2	7556.81	9453.46	7770.13	8733.36	7955.39	9888.91	11216.9	10391.2	11108	9710.88	9429.43	9379.99	8723.62	9492.34
Npepps	52012.3	52721.1	49080.1	45561.5	49572.7	49143.7	49138.9	45791.2	51209.9	48463	49251.7	49369.5	48166.7	50770.1	61006.6	56375.1	60667.1	56843.1	57263.7	52921.7	61588.1	55575.6	61728.7	61214.9	59652.8	58536.4	60344.3	56848.7	60547.8	59884.6
Padi2	7309.93	6878	7261.13	7081.01	7516.53	6948.89	7322.57	7319.44	8191.97	8062.81	13386.5	14639.8	7503.69	6521.25	9265.35	9407.05	8539.95	9192.7	14157.2	14062.7	8150.18	7626.33	9502.23	9805.15	12148.2	11933.4	15295.5	17033	12177.6	12646.3
Pa2g4	52037.7	49492.2	48412	45180.2	44062.7	46260.1	52630.5	48517	51574.7	50462.2	48446.1	51464.5	39009.6	44358.1	34121.9	36175.1	32613.8	34282.8	34133	33770.9	31870.8	32996.9	34775.2	35204.3	36025.4	35799	33953.2	35283.3	36193.1	38733.7
Asprv1	1635.37	NA	NA	NA	NA	NA	452.083	NA	805.3	755.41	NA	NA	875.089	166.471	NA	NA	NA	NA	NA	NA	NA	NA	287.818	NA	1215.92	NA	29.4663	164.721	328.212	NA
L1cam	16740.6	17069.2	18077.7	17690.2	15715.5	14098.4	16592.8	15215.7	15793.4	15340.1	15837.9	14907.7	16356.6	13337.1	22132.3	20815.2	21634.8	21581.2	21991	20224.7	19202.6	19662.4	25655	25975.7	23218.2	23001	18849.5	20624.2	21887.5	21493.1
Pcbd1	18987	15017.3	15550.7	14414.9	14870.4	14462	15049.9	14801.2	15557.4	14971.1	16242.8	14947	12294.5	15204.9	24010.1	17276.3	25673.3	22644.4	21934.3	23202.6	26226.8	23470.1	27119.6	24707	25452.8	22766.4	22148.3	19808.1	26266.3	25111.3
Fsd1	5516.84	5085.06	6294.04	6264.06	6354.37	6421.63	5062.44	5861.63	6760.02	7115.57	5923.51	6272.51	6378.98	5916.33	8870.02	8846.83	8523.12	8248.74	6718.01	6780.42	7906.98	7977.6	8493.67	9477.92	8359.86	8599.49	7145.34	7996.16	7751.62	7731.16
Prrc2c	4445.91	4376.28	4043.36	4975.83	4665.75	5237.13	4185.01	4355.91	4711.4	5252.95	3664.41	4997.47	5331.02	4664.32	3111.27	4078	3204.41	3201.83	3014.36	3234.08	2980.86	2987.79	2980	3276.56	3374.14	2790.55	3228.67	2938.54	3387.69	4111.59
Cul4b	2931.31	2644.35	2735.65	2976.49	3210.89	3010.17	2784.21	2974.54	2901.15	2462.57	2808	2959.11	2242.66	2139.95	2777.99	2717.02	3053.67	2145.75	2726.97	2083.66	2388.25	2401.79	2263.2	2177.33	2723.03	2834.35	2417.7	2176.07	2914.26	2581.34
Dock5	1718.97	1881.25	1639.12	1937.88	1628.81	1788.8	1808.68	1892.4	1783.69	1864.07	1723.43	1660.55	1875.23	1791.48	1752.71	1710.85	1604.54	1557.21	1586.84	1625.05	1719.18	1740.78	1752.75	1960.66	1716.75	2013.65	1614.43	1521.48	1534.55	1572.9
Ppcdc	1359.39	2103.51	1434.96	1222.24	1623.4	1563.65	1282.85	1266.84	1385.95	1098.76	1650.04	1519.56	1619.06	1607.3	1327.7	1666.56	1273.57	1657.84	1288.04	1405.92	1302.91	1521.61	1947.39	1476.01	1490.8	1851.68	2099.15	2230.07	1491.47	1112.12
Srsf3	39309.6	39568.6	37489.8	38724.5	30867.3	30100.5	38015.9	34122.1	36116.2	39390.5	36483.3	38431.7	36305.3	39736.1	28408.7	33261.8	24994.6	27619.9	25197	24941.9	21060.9	27240.8	25165.2	28340.4	26254.8	23558.6	26687.6	25756.4	28177	24792
Pdgfrb	8431.82	8680.03	7214.02	8003.65	7015.53	8270.13	6835.71	7391.62	8097.34	8606.86	7705.03	8426.96	7675.76	7122.46	8643.84	8266.67	8233.62	8208.27	7136.23	7858.08	8236.72	8257.52	7653.91	8832.69	9288.5	9084.35	6611.62	8067.42	7717.6	8903.17
Nsdhl	48654.6	53767	62677.8	63720.8	65860.7	63212.4	63031	62685.2	68991.3	60570.5	56908.6	58269.1	55415.2	62304.1	12620	15615.7	15913.6	14027.3	12826.8	14177.1	16738.7	16140.3	12020.5	16228.2	13887.2	15338.7	14709.7	15516.3	16516.7	14929
Tcp1	52696.8	53623.3	55320.9	50464	50393.3	51640.5	56765.6	53549.5	52362.1	51588.7	53676.3	56665.8	56539.5	59239.8	51617.4	48658.1	53541	53869.9	49629.5	51201.1	53264.1	52892.3	50901.7	50926.9	54095.2	52817.9	54263	52273.2	49955.9	51762.2
Acbd3	7475.04	8065.52	8087.57	7697.96	7032.47	7927.43	8359.53	8041.92	7660.73	7461.89	6268.02	6852	6196.15	6181.72	3957.51	4859.43	4692.1	4241.14	4513.85	3837.28	4532.79	4282.89	4511.26	4018.14	4869.15	3874.46	4621.82	4414.3	4251.3	4932.29
Ltc4s	800.305	594.272	511.522	175.377	376.252	604.373	572.332	1151.91	438.639	718.513	673.972	577.681	501.131	243.831	NA	1037.58	NA	NA	819.323	465.358	326.702	NA	48.5292	599.759	280.058	NA	225.755	NA	547.4	629.487
Folh1;Naalad2	2313.89	2129.89	1828.88	2027.28	2106.35	1593.24	2231.71	2297.79	1555.32	1666.5	2163	2200.23	1933.92	1763.56	2005.82	2339.98	2611.57	3294.42	1890.2	2555.54	2122.56	2234.16	2333.28	2368.73	1992.83	2860.86	2674.07	2594.89	1843.66	2536.33
Folh1	4960.87	4809.81	4912.64	4769.25	5868.93	5607.87	4878.75	4231.67	5550.96	4850.77	4654.76	4422.36	5084.61	4385.24	3966.28	3580.98	3533.58	3499.83	3812.56	3805.2	3901.94	3494.75	4346.19	3970.13	3038.53	3798.39	2858.9	3336.02	4003.25	3093.34
Necap2	16641.9	18691.3	16488	15594.1	16735.9	16328.3	16416.2	15933.1	18607.1	15231.2	15864.1	14910	16174	16187.3	14471.6	13957.1	12033.6	13213.5	12629.9	11282.2	12322.4	13876.8	12950.7	12513.2	13120.8	13116.3	11870.9	11665.9	14497	13012.4
Atp6v0d1	17324.7	18349.7	17780.8	16130	18197.8	18080.9	20935.1	20367.8	16256.6	16760.7	18781.6	20974.9	18737.6	18653.7	14018.3	15094.3	16709.6	15011.8	15072.7	15395	16317.7	17116.6	16391.4	16167.5	16204.4	14441.9	13564.3	13945.7	13908.3	13232.1
Mmab	5093.42	5065.38	5627.93	5495.48	5015.08	5533.79	5424.15	5022.42	5334.29	4743.55	5639.81	5107.05	6002.51	5989.43	5245.73	4609.07	4985.61	5573.49	6166.03	5257.05	5191.95	4863.92	4397.99	5280.68	5442.17	5849.02	6213.96	5235.3	5302.84	5228.37
Ermp1	10877.1	11620.2	10519.1	11483.7	10372.8	9971.33	12075.1	12786.7	9934.65	12259.1	11019.8	10640.7	10944.3	10929	12063.7	11604.4	9102.72	10548.8	12147.9	9833.96	8969.18	11212.6	9301.49	10324.2	10210.3	11166.4	9748.98	8975.49	9685.67	9551.85
Eftud2	9505.44	9443.39	9578.85	7104.94	8443.36	8531.39	9716.13	9523.35	9884.83	9269.54	8843.4	7931.57	9769.28	8888.83	6704.42	6370.65	6736.53	6795.53	7178.13	6111.03	6288.16	6369.01	6421.67	5975.12	6456.92	7220.77	5551.7	5838.41	6804.57	6121.44
Mbd2	3057.16	3330.03	3693.2	4704.29	5174.59	3594.47	4289.54	5148.25	4359.95	4503.93	4005.4	4214.67	4045.99	4683.68	3663.21	3814.44	2995.78	3479.02	3873.36	2735.23	2743.5	3039.95	2480.53	3605.34	3055.43	2877.95	2055	3884.92	4056.74	2743.73
FAM120A	9898.51	10550.6	9776.37	10655.8	9367.8	9918.71	11170.1	11014.3	10218.7	10747.8	9764.52	10239.5	9306.5	10593.7	7488.41	7764.29	8033.67	6986.13	8245.71	8228.25	6490.15	7075.46	6028.13	6579.39	7581.93	6472.06	6624.53	7341.38	7611.36	7392.83
Rplp0	57887.2	55956.3	61161.5	55507.9	54700.8	53244	66371.6	67100.6	61844.9	55383.5	58288.2	56937.1	55834.9	58982.6	35182.5	32518.1	39494.9	38271.4	41010.6	37378.4	39079.4	38111.2	36283.8	34619	37641.9	35580.2	38185.6	37248.8	40699.5	40739.2
Dtna	9648.46	7568.92	8078.12	10756.8	10256.6	10724.8	9333.76	8902.94	8809.35	8879.84	9636.63	9644.29	10024.4	11055.5	18551.3	18989.5	21100	20896.6	20620.7	20260.3	19471.2	20597.7	18556.9	19736.7	18350.2	23138.6	20404.7	20711.2	20537.4	17891.4
Ptges2	3677.3	3327.42	3964.84	3842.75	4042.54	4249.37	4174.95	4699.06	4088.1	4747.15	3686.05	4443.27	3986.27	3737.5	2655.39	2896.68	2580.08	4375.28	3632.45	3982.52	3136.87	2655.76	4078.62	2703.47	3380.59	3412.91	2722.7	4150.06	2733.5	3819.12
Ryr2	727.672	952.902	1370.76	1065.31	1507.56	1244.61	415.744	666.992	1442.97	1481.23	911.076	966.213	1073.37	946.493	697.341	1506.27	1639.98	1753.7	1589.57	1000.93	1249.59	1490.21	1114.17	952.412	818.313	1313.32	878.542	1409.38	854.604	1486.09
Mapkap1	839.203	998.034	1417.16	1301.86	1111.58	973.061	1203.32	1435.52	1224.94	933.098	1063	912.328	1304.33	1214.12	1151.28	972.921	842.093	1041.07	1430.37	942.964	886.888	703.547	1091.26	916.342	675.402	635.334	690.33	1097.74	884.726	1056.67
Txnip	600.054	982.393	1583.15	NA	942.364	1089.2	976.584	909.2	1321.01	1341.4	1068.44	1227.91	1144.19	1367.59	1018.91	1270.8	1198.1	871.47	1501.27	NA	1686.71	1621.57	800.625	838.615	1485.93	518.008	623.578	1389.28	1216.29	1174.43
Ogt	10786	10481.6	11034.3	11641.1	9483.8	10519.7	11069.7	10678.1	9994.92	9871.92	10329.9	9276.69	9893.59	9540.64	11011.3	11625.9	11689.4	10164.5	9740.65	9032.3	10710.6	9989.65	9864.85	10346.9	10375.9	11411	9536.57	10779.7	11120.3	9914.75
Trap1	101854	97147.7	93280.6	93096.3	92388.4	82058.7	91483.6	92205.7	87253.3	89978.4	101287	101658	72821.2	80683.6	96329.8	95119.8	89680.9	102840	114480	113251	83778.2	70469.3	81197.5	70823.1	95023.8	94425.9	108093	96865.4	111084	114905
Thumpd1	4258.99	4840.63	5077.18	4429.31	5056.54	4535.84	3788.6	3574.4	4899.85	4823.45	4214.56	3433.99	3924.91	4726.34	3360.04	4116.54	3242.32	1484.13	3083.84	3242.89	3418.15	3540.03	2489.68	3111.29	2972.84	3950.19	3311.9	2405.76	3921.7	3991.44
Dock10	4197.26	4055.57	4698.4	4442.07	5191.23	5406.89	4630.29	5712.72	4982.83	4940.11	4416.34	5070.37	4885	5170.66	3668.38	4017.34	3747.86	3548.93	3653.45	3341.84	4213.34	3645	3411.79	4111.2	3714.97	4349.97	3410.38	3865.09	3582.23	3966.09
Serpinc1	131661	122298	90002	88805.8	86493.6	86948.3	90023.1	93391.9	85454.9	83319.6	121515	125844	92144.8	98350.8	111861	105601	86161.7	78274	119634	112804	105343	107462	113667	128827	143959	144195	121673	120396	136040	132882
Rragc;Rragd	6543.12	6338.61	5805.19	7115.5	6847.83	6636.62	6035.27	6232.88	6848.14	6087.42	5780.52	5584.91	3850.82	5871.09	4972.93	5537.38	3692.38	6001.7	3744.48	6290.89	5627.41	6192.54	5321.32	5679.39	6977.87	7017.63	6728.39	4742.36	6725.59	6041.46
Rpl34	70602.8	79954.2	73644.9	72339.4	69250.5	76100.7	101063	98776.2	74481.3	80524.4	64325.6	80865.5	43941.1	76762.2	46249.2	44798	51513.2	49926.5	50748.4	52109.2	51586.8	49727.8	40726.4	42048.1	43334.2	37739.6	48936.3	55303.6	51225	67462.5
Vcpip1	3308.22	3836.64	3665.56	4014.44	3860.43	4492.7	3289.81	3752.04	3536.1	3956.08	3100.37	3663.47	3701.92	3649.6	4045.07	4363.16	4243.04	4185.48	4037.58	3824.38	3725.49	4197.97	3835.33	3788.61	4383.41	4674.91	4246.14	3978.91	3914.39	4070.23
Vwf	6995.96	6387.34	5118.37	5633.33	2981.9	3881.6	4253.66	4998.41	3160.08	3364.62	3866.64	4615.21	3870.66	4202.7	9213.53	10051.9	6112.82	6850.32	5644.61	6500.74	5700.38	5771.4	4260.42	4290.99	4931.55	4802.7	5392.22	6577.39	7424.91	7377.96
Chd4;Chd5	7405.78	7141.07	6553.62	7355.8	5935.08	6614.98	6773.3	6608.37	6807.69	7017.86	5725.34	5649.89	6811.45	6247.51	4959.69	5218.29	3595.65	4465.91	3597.38	4359.27	4681.01	4373.75	4575.34	4060.83	4063.8	3767.34	3472.14	3977.8	4927.77	4797.72
Dyrk1a	1091.76	704.967	952.881	422.708	1080.87	755.484	812.524	937.521	1124.34	814.037	793.695	726.272	1054.3	751.846	542.685	885.12	770.128	1011.32	1187	840.495	544.259	912.587	777.411	1006.35	811.862	1491.45	679.857	889.544	743.572	844.386
Hsd17b11	72226.5	68285.3	78773.8	69720.5	72298.4	70095.1	80876.8	75053.1	75718.1	73422.8	78349.2	77780.6	62834.6	76781.4	68629.8	66393	63822.3	62543.7	60021.5	61687	63622	62183.4	68429	62191.9	59656.7	65723.7	59585	61452.7	64157.9	60520.4
Sgk3	NA	NA	NA	864.017	1144.05	NA	1535.4	NA	NA	864.1	NA	NA	NA	1321.91	NA	NA	NA	NA	NA	986.567	NA	826.109	921.926	529.226	NA	NA	NA	NA	971.41	NA
Sdk1	4363.32	3607.34	3609.72	3850.2	4642.93	4174.45	3711.6	4435.6	5158.3	4296.41	3994.7	3769.46	4076.56	3980.63	3564.56	3817.66	4250.35	3275.64	3888.95	3290.87	4488.09	4052.03	4698.09	4147.04	4361.36	4851.61	3350.28	3655.98	3268.12	3698.67
Rab10	73727	71871.3	65608.5	75724.4	55935.3	59809.9	56022.5	68006	72317	68095.6	56483.2	69178.3	66810.8	53580.5	55317.3	60730.8	51375.2	63096	60114.5	68540.8	58986	54584.4	65752.9	58264.5	59471.8	62605.6	52172.6	75028.5	68233.2	67463.9
Acsl6	12816.4	13086.7	13957.9	12897.6	15008	14804.9	12190.4	12917.1	16831.1	14452.9	14251.7	15126.5	14545.3	13951.2	17281.5	15732.7	17824.5	14668.7	15537	14149	15402	15170.7	16694.7	16157.7	16518	18730.2	15477.2	15080.5	15002.4	13979.6
Fry	3457.38	3814.19	2965.81	3205.4	3568.56	2900.63	3453.23	3235.46	3950.86	2975.45	3558.55	2809.36	3698.99	3675.04	2473.64	2169.43	2362.69	2818.47	2054.63	2578.33	3314.73	2831.37	2814.09	2965.14	3470.85	2971.01	2298.73	2063.85	2905.89	2980.22
Apom	2566.67	3615.08	1841.98	2666.18	2186.47	3188.99	2553.1	1974.16	1936.77	1671.05	3531.44	4245.37	3343.35	5028.71	1858.17	1972.26	886.259	751.597	1754.49	1604.85	2003.65	1662.95	2196.71	1811.88	2275.76	2853.42	2559.81	3366.06	1523.54	2678.99
Trappc12	4914.48	5748.3	6015.58	5356.44	5848.39	5451.23	5510.05	4899.07	5694.53	5306.34	5299.5	4750.54	4803.62	5866.34	4421.44	5936.9	4684.56	3964.93	4469.98	4381.28	4419.1	5506.2	5471.22	4707.62	4385.85	5554.58	5171.28	5540.88	3651.59	4787.55
Galk1	25552.3	24036.8	23400.4	21965.2	24936.8	24365.4	23655.9	22304.9	26338.3	22319.8	24110.7	22983.2	23229.5	26088.8	17852	15756.7	15948.2	14479.8	15175.7	13545.6	17180.4	16124.9	18813	18531.4	19372.3	17086.1	19119.4	18089.3	16168.5	17147.8
Ppp2r5e	10455.2	8880.84	10337.9	10131.1	9802.35	10986.2	9921.87	11710.7	10614.9	11188.5	10834	11941.9	11827.6	10886.4	11405.5	15455.9	12481.7	14420.6	11333.6	12418.3	12015.3	10525.1	11162.9	12116.7	11221.2	12065.6	8926.48	11451.2	9815.21	12697.6
Spart	47665.7	39743.7	45500.9	43473.4	37895.9	39326.1	36666.3	36116.2	39068.9	42864.6	36249.2	36506.3	33592.3	36987.9	30388.2	30561.6	29974.1	27231.7	30625	29866.9	30525.4	27207.2	33113.9	28805.2	27748.1	31698.2	30794.7	31274.8	28406.7	34116.8
Rpl3	36416.4	38292.9	42049.7	34536.8	32936.2	33079.9	40579.3	36109.4	38751.3	34951	36691.7	32540.9	31953.6	34616.7	24796.2	24286.5	23749.2	22945.9	20960.3	24482.7	19918.3	21444.7	24895.8	21305.6	25650.5	23766.3	22387.1	23495.6	27063.7	24459.2
Mbd3	1116.4	771.213	955.289	1307.1	1005.71	1107.21	NA	1244.86	NA	1726.24	874.106	NA	NA	1133.25	NA	NA	NA	NA	NA	NA	NA	NA	NA	NA	NA	NA	NA	NA	797.157	344.857
Mill2	1973.4	2196.72	2304.68	2662.26	2015.36	2815.2	2519.86	2264.19	2944.31	1937.04	2073.73	2650.58	2222.06	2384.08	2558.71	2574.83	2068.55	2267.18	2013.04	2591.01	1719.07	2332.95	2654.75	2420.98	3433.88	3228.08	2157.13	2642.58	3186.9	2873.16
Arfgef2	2484.37	2489.37	2698.51	3474.46	2667.78	3012.74	2915.7	2755.68	2581.43	2865.15	2412.55	2733.25	2497.71	2786.63	2353.53	2935.35	2237.87	2295.72	2466.6	2297.68	2581.6	2130.34	1774.34	2562.77	2151.83	2803.09	1988.62	2579.43	2508.99	2360.48
Steap4	14803.8	14403	12904.2	15057.9	9141.09	11979.3	13791.8	14604.2	8846.34	10821.5	11235.5	11198.7	8160	9565.07	14086.8	17295.5	14746.6	15103.7	15752.5	18817.8	13979.4	14071.6	9763.16	10019.7	9614.2	10429.5	10222.8	13556.2	14183.5	14048.9
Steap3	25059.9	25731.2	25784.9	24033.3	24527.5	26094.5	29853.9	30769.4	28897.3	27703.5	27900.6	28305.3	28460.6	29033.7	17616.9	17879.6	19190.6	17216.3	19640.5	19310.4	22171.4	20054.7	21380	21307.6	22767.3	22826.5	21643	22311.7	19271.4	18794.6
Gys1	5230.95	5452.03	3917.81	4150.11	7175.9	8623.99	4159.7	5436.73	9712.91	10292.6	16885.3	15072.8	4412.47	4351.07	11190.3	11991	12667.7	15291.9	32358.4	27931	7337.23	7291.04	4686.36	4386.76	8845.14	8982	23458.3	23686.5	16182.8	16401.2
Fbn2	4312.24	4900.22	4635.55	5256.41	6237.68	7115.51	5838.48	6232.72	8381.64	7399.13	7567.91	7068.56	8987.94	8833.17	2500.55	2562.65	3297.82	4457.51	4051.99	3423.69	3028.71	2335.62	NA	2111.28	3198.9	3954.38	1880.13	3141.84	3635.24	2831.63
Cd2ap	6702.15	6908.42	6081.21	6450.53	6110.8	6420.89	6005.78	6385.47	6394.17	6633.93	5827.92	5726.29	6969.58	6438.24	7063.1	6754.08	6528.27	6858.75	5666.98	6571.59	6720.75	6383.26	6900.78	6034.34	6523.28	7380.99	6303.41	6785.66	7279.75	6196.59
Yjefn3	9219.35	8783.74	9248.34	8668.36	10158.8	9307.71	8666.51	8593.71	10035.1	9674.7	9760.2	8259.54	9977.04	11550.2	6403.68	5752.03	6065.92	6474.93	6121.16	5784.53	6593.1	6069.02	6196.46	6983.12	7040.23	7207.51	5803.07	5981.93	6314.07	5566.4
Cul3	17104	17287.8	16766.8	17077.2	18258.4	17550.6	16485.2	16528.8	17615.4	17656.6	17336.1	17417.8	15456.2	15513.1	17527.2	18433.5	15550.8	14994.2	16358.8	15397.8	15559.6	15447	18221	15962.1	17997.6	17709	15251.9	16162.3	16584.8	17132.2
Lancl1	34725.7	36018.8	34424.5	29766.1	36580.6	33441.4	33696.8	33655.4	34290.5	36025.5	35238.1	35163.9	33304.2	32767	59863	50583.2	55313.9	54481.9	51489	49366.7	56623.2	55539.6	60130.5	58804.4	59720.8	59567.9	60567.3	55680.2	51794.7	55583.7
Uqcrq	39377.9	32952.3	34650.6	41610.8	35783.8	36582.2	41124	35736.4	39330.1	46878	42983.3	50499.3	16956.1	23945.7	45378.9	53895.3	58291.3	60868.4	66191.6	72522.8	40750.6	40183.2	42975.7	39605	43928.2	46761.5	46709	52556	51752.9	56448.1
Baiap2	5608.17	7321.83	6612.9	6631.24	5646.48	6172.98	6858.24	5671.87	6327.76	5426.7	6319.81	5790.98	4740.54	5761.55	4434.83	5087.17	4488.59	5037.54	4377.85	4421.41	5062.83	5172.16	3769.63	4478.62	4420.08	5029.1	4518.61	4250.84	4505.56	4944.28
Dhx57	544.394	753.895	640.487	471.708	340.187	691.701	NA	593.655	488.605	561.643	NA	NA	827.461	428.727	468.73	638.415	539.863	NA	476.888	325.828	NA	367.237	514.5	NA	NA	977.22	NA	718.907	NA	NA
Slc9a1	4688.26	5526.68	5580.6	5108.53	4978.64	4149.74	4735.59	4471.51	3847.95	3492.91	3673.28	4145.33	6974.18	6635.7	6444.39	7473.05	6758.35	6245.28	5881.28	6880.03	5680.66	7611.2	7161.5	6997.18	5358.45	7906.2	6258.55	6784.75	6029.9	6392.21
Niban1	18498.8	17681.3	14701.3	14567	16830.1	14914.2	17171.7	17079.3	16615.1	15700.2	16531	15600.9	13037.4	15282.1	15284.2	13358.1	15187.9	15282.9	15763.3	14914	16348.2	15793.4	12491.2	12863.7	12328.6	13155.6	11795.2	11991.6	15345.9	14561.5
Arhgap18	1770.23	1606.47	1498.83	1733.08	1876.86	2196.85	1787.31	1853.3	1589.78	1501.83	1601.84	1230.23	1911.89	1694.2	1609.4	1990.04	1459.94	1524.25	1630.64	2039.1	1378.02	2083.47	1331.87	1206.55	1516.59	1839.55	1229.6	2120.51	1376.72	1435.96
Casq2	2747.94	3706.29	2890.01	2195.8	4645.23	4252.01	2051.12	1576.29	8392.58	9291.78	8753.55	7987.98	2417.76	2007.07	5866.67	6005.84	14304.5	13736.4	7905.67	9417.04	6839.72	6106.83	3746.4	3144.16	4817.47	5593.15	7129.45	7475.5	5919.03	5238.42
Prdx3	58259.3	57025.8	60651.4	61181.4	55639.2	54373.1	60155.5	62681.3	60698.7	61625.1	69125.9	72871.4	59098	61236.6	77883.3	78566.7	87405.8	82970.4	92993.6	97116	80816.1	78288.5	62568.1	71798.8	69208.5	67745	89879.3	93872	83875.6	85220.6
Lamp2	41998.3	41853.5	39118.1	34332.2	36190.1	37055.7	44609.7	41529.8	39792.8	36866.7	42051.3	35150	33775.4	39203.6	32075.2	28189.3	31670.8	28979.3	33863.2	30535.3	35416.6	37302.1	31467.5	28315.3	29929.3	30797.2	30964.3	29716	33181.1	27569.8
Mtpap	1892.72	782.971	1435.29	1718.32	2174.1	2374.66	1513.01	2403.71	1536.43	1502.24	1786.29	2458.54	1686.26	1394.83	1665.78	1566.31	1456.15	1544.5	1126.94	1489.37	1161.29	1610.14	1551.73	1461.78	2077.93	1582.51	1714.22	1602.69	1868.44	947.371
Akr1b7	5074.04	5730.12	3785.06	3420.33	5504.71	3919.96	3764.06	4305.15	3401.34	5022.99	4763.58	5160.86	4817.49	3458.33	4386.73	6662.84	4878.32	4563.66	8578.91	9150.88	5596.21	5693.92	6934.4	5811.99	6790.49	5101.67	6723.41	7614.23	5652.68	6686.97
Gns	7177.5	7539.94	6301.4	6569.81	7333.9	7306.94	6157.63	6660.1	7092.19	6199.72	7130.25	8501.89	7761.27	6996.48	6251.95	5739.22	5354.45	5458.86	6997.79	6614.68	6349.32	5930.38	6372.45	5956.19	5738.19	6613.75	6018.42	6689.43	6527.33	5785.93
Oplah	9628.19	10016.7	8792.47	8924.12	9067.67	9902.77	8928.24	9271.72	8956.57	8924.35	10404.2	11012.5	11369.8	9988.7	12819.5	13031.1	12812.7	12983.8	12963.9	13354.6	11142.1	11871.4	13241.6	12929.3	12313.3	13553.4	15258.1	15426.4	13572.2	14334.9
Stx11	NA	NA	NA	84.9934	NA	127.317	NA	96.9632	24.484	NA	NA	98.3884	NA	NA	NA	235.985	NA	NA	NA	NA	NA	NA	NA	NA	62.3434	NA	NA	NA	NA	NA
Bmp1	1516.66	1451.71	1147.97	1427.99	1528.72	1581.65	1411.47	1585.39	1169.66	1512.23	1109.15	1270.98	1152.1	1341.74	1387.16	803.815	852.824	1038.7	1075.24	794.245	981.086	852.97	648.373	920.899	964.007	NA	934.175	777.903	860.386	1201.32
Xrcc5	5049.34	4654.69	4004.9	4361.55	4248.27	4594.39	4999.58	4295.3	5427.56	5572.05	4846.01	4808.13	3887.84	4979.02	2951.91	3058.42	2686.47	2921.52	3353.2	3216.14	2902.56	3805.89	3252.17	3486.14	2885	3769.75	2779.53	3692.19	3236.22	3815.97
Krt81;Krt86;Krt87	117614	101942	30644.3	34323.7	14351.5	10272.6	104919	98030.3	11012.4	10273.6	13774.2	13356	39448.3	27113.9	64631.4	68149.3	6361.31	5194.57	2475.94	1963.92	14694	10133.7	25022.2	24318.8	79509.1	50204.8	43551.5	43318.7	75761.3	75766.5
Rangap1	8885.97	10094.6	8827.78	10297.7	9008.15	9924.33	10537.8	10372	9240.79	9901.97	8976.51	9421.48	8240.6	10595.9	7962.12	8684	8535.61	8731.83	8689.66	8775.01	9407.57	9447.38	7593.1	8981.89	6532.5	7973.54	8788.03	9547.41	8289.65	8417.16
Gfod1	1216.11	NA	NA	1318.2	NA	NA	915.161	1210.49	NA	1126.5	NA	NA	1203.86	1130.9	1739.31	NA	NA	NA	1291.05	NA	NA	NA	NA	1488.95	NA	NA	NA	NA	NA	NA
Hspa4	70556.5	67966.4	70257.6	70964.7	66633.1	70183.6	68123.8	66247.6	69074.9	67814.3	70257.4	74305.8	69631.1	69089.4	78168.6	81530.4	74491.6	77387.7	71898	73521.5	77325	75810.5	77546.3	78335	76425.9	73825.8	74936.9	74157.6	73350.3	75206.9
Ubxn1	16737	16972.3	12953.9	17201.5	14823.2	15190.4	13875.2	13304.3	16011.4	15900.3	14331	15142	11821.8	15852.3	17498.5	16615.6	17066.4	17222.9	15468.2	15803.3	15061.4	13318.8	16524.1	18613.4	17812.5	17410.5	15503.6	15145.1	18717.9	19321.3
Arhgap39	2191.57	2265.62	2139.64	2175.4	2032.03	2395.77	2736.47	2176.97	2477.52	2242.32	2241.04	1793.65	2485.23	2690.93	2351.5	2277.95	2551.59	2464.11	1903.27	2105.02	2403.47	2034.38	2149.12	2087.99	2289.5	2392.37	2453.8	1839.07	2004.89	1512.76
Vamp7	2666.17	3171.79	3151.59	3582.7	3188.2	3136.36	2854.47	3674.18	3857.94	3512.35	3424.27	3788.46	2730.66	3634.46	2443.41	3453.13	4038.11	3391.45	2836.4	2959.67	3500.88	2835.31	3177.56	3661.54	3195.39	3388.65	3406.03	3576.4	3034.47	3815.32
Thbs4	17103	15433	13604.2	17618.4	16011.7	15211	11606.5	14587	13374	17229.9	14543.4	14645.7	18998.1	14564.4	12025.8	15170.2	14920.3	15327	10213.2	14576.3	11008.2	13104.5	11934.2	13250.4	11891.9	12326.3	11839.9	15611.1	12583.2	12313.5
Esd	85243.3	84754.8	73039.6	71853.3	74046.9	73600.1	71871.2	74168.7	80485.1	74221.1	78822.7	86751.5	87497.1	85097.9	110900	91249.9	112301	106265	97585.7	90055.6	102420	97409.3	114750	115981	105479	104848	113538	106001	103642	109442
Ptpn9	4078.5	4600.47	4320.35	4578.73	3439.46	3538.98	4287.37	3988.23	3770	4226.25	4051.92	3828.16	3633.37	4366.14	3617.48	4283.64	3620.17	4045.5	3623.96	3774.5	3117.23	4203.65	3489.03	3508.04	3040.3	3417.24	3884.11	4058.03	3855.26	3934.69
Psd3	1500.9	1565.37	1353.37	1466.92	827.323	1795.17	1423.72	1734.4	1747.38	1818.24	1412.77	1735.6	2143.88	2005.34	2024.91	1702.78	1218.3	897.079	2234.58	1233.97	NA	849.045	1207.63	648.661	1208.58	2479.08	1219.24	768.447	907.767	1638.64
Gprc5b	3581.25	3411.6	1857.09	2577.21	3490.24	2860.32	3364.03	3120.69	2595.87	2840.23	2785.93	1957.8	3288.51	4125.15	4017.1	3292.78	4152.44	4463.97	3339.25	4178.07	3418.45	3991.65	3843.46	3478.59	3741.79	4584.49	3989.34	2889.07	4497.17	2705.46
Sec61a2	6386.73	5183.69	NA	6757.98	3821.06	5707.67	5560.07	6633.48	4746.21	6112.07	5060.78	4721.26	NA	5000.41	4579.6	3523.42	2416.82	3286.28	6297.05	4639.42	2423.08	2980.35	1955.29	2544.63	3204.61	3999.71	4017.71	2474.33	3364.88	3510.37
Sec61a1	27276.5	23720	25307.5	25290.6	27798	27049.8	26466.3	26419.1	24110.8	24005.9	21901.7	25722.1	22643.8	23418.7	6986.47	10495.6	11454.4	11601.3	11228.6	13014.4	11825.9	14492.9	8569.62	11324	10840.5	10893.2	9670.75	9551.75	10878.3	12458.6
Msn	249769	230499	237633	221897	218727	214734	221289	218906	221065	229066	225274	228049	200896	193727	244729	243625	237397	246329	236827	247507	242263	230065	258417	246552	238530	230645	217171	229546	248606	252005
G3bp2	6100.63	6911.51	6701.35	6471.21	5984.71	6392.57	7410.15	6692.73	6743.21	5955.3	5750.13	6782.59	5436.15	6592.13	5048.4	4925.61	3991.7	4625.91	5326.64	5349.56	3839.29	4754.33	4371.24	5761.98	4755.92	5964.91	4911.49	5724.21	5610.53	5589.76
Numb;Numbl	3104.69	3815.43	3244.13	3539.54	4460.85	3919.87	4194.45	2994.57	3847.67	2469.44	3990.73	4025.36	NA	5326.09	4087.93	2599.85	4614.09	3342.67	3881.81	3044.09	3964.76	3702.28	2703.39	3953.21	3589.68	4204.96	3437.71	4085.64	4987.14	3759.93
Caskin2	3028.1	3342.84	4085.23	4324.13	3789.31	4228.41	3209.74	3855.07	3182.58	4352.53	3231.78	3544.17	2930.93	3438.37	2055.55	2829.7	2294.68	2046.41	2390.96	2426.25	2161.73	2560.85	1836.6	1858.28	1943.95	1966.12	1480.86	1936.43	1878.4	2052.29
Srsf7	28169	28380.2	30788.7	27289	27476.1	25097.7	30097.8	29181.6	29448.1	29588.3	29455.5	29366.5	32955.2	32998.7	21658.6	19271.5	19807.4	20754.7	23001.8	21750.3	20910.1	21817.3	25094.9	17966	22176	19403.9	22575.9	21818	24840.2	21300.2
Naa20	713.027	955.978	915.332	676.854	1395.82	1214.97	928.222	1338.38	1030.19	942.471	1202.39	1179.12	1090.61	1312.65	914.938	1008.45	640.546	885.843	1346.11	1329.12	827.629	621.223	1408.64	919.752	1352.87	545.858	1371.94	996.061	1530.76	812.664
Clasp2	20841.2	19841.9	20749	20381.2	20651.7	22384.7	20401.9	21065.3	20586.3	18737.9	19138.4	19483.5	18895.8	21155.7	18353.6	18788.4	18410.3	18483.6	17062.4	17575.8	17958.8	17722	16719.6	18118.4	19282.3	18994.2	18456.5	17078.6	18052.4	18057.9
Nsfl1c	31557.7	30827.3	32697.2	33956.5	29749.8	31302.8	28926.4	30102.2	30409.9	33294.8	30149	31517.5	28681	28749.5	29599.5	30787	29528.8	30067.5	28594.1	32027	29713.5	31357.6	28701.5	31561	32655.4	31983.2	31415.5	32396	32440.3	33899.7
Haghl	1085.66	1291.91	1090.46	1367.42	759.346	1122.34	910.218	849.059	1356.85	1238.63	1174.56	1551.27	975.263	1098.07	1253.87	2482.45	1386.81	1635.45	1783.29	1539.8	1138.94	1203.14	2027.24	2268.51	1841.01	1883.42	1946.11	2658.01	1437.07	2501.59
Atp2a2	59975.6	58010.1	58805.7	45711	49612.1	47733.7	58858.9	52373.6	54453.7	46949.4	52380.4	46010.8	54825.2	51253.2	54076	45783.2	110442	96373.8	62495.2	57835.7	62605.4	55427.1	49831.3	45079.3	51706	49442.9	45055.1	42392.3	53384.6	50627.2
Add3	60683.5	58612.8	59043.3	54186.7	54628.4	57530.9	53075.5	54605.6	57016.2	54842.7	55141.7	61734.4	53095.6	56436.9	66399.9	64754.5	64405.7	65884.1	61177.9	64899.7	64483.5	69577.8	65332.6	64634.3	64425	60496.1	57100.6	63850.1	66481.1	65414.6
Tgfbrap1	1990.91	2277.24	1681.11	1457.89	2140.33	2151.72	2377.41	1713.85	2095.06	2045.38	1860.03	1684.25	2235.94	2757.45	1680.09	1993.2	1669.61	1645.21	2001.99	1209.24	1939.29	1704.48	1659.76	1477.35	1461.04	1810.74	1162.56	1896.55	2266.52	1855.76
Fah	20662.3	20361.2	19750.3	20160.6	18588.4	18237.4	19013	21018.5	18300.9	18559.1	22297.7	21755.4	20945.9	19787.9	23481.3	24490.2	23877.1	23931.2	24247.4	22243.3	22579	22058.4	21399.8	25358.5	21941.5	23599.9	24222.6	25724.8	24905.4	21597.1
Lztr1	1065.75	1140.32	747.762	921.656	454.353	855.461	646.945	941.047	569.692	1066.37	457.017	922.558	514.486	922.968	587.76	209.979	317.672	521.473	863.36	763.767	1000.84	856.51	482.815	552.256	543.434	684.456	430.597	520.9	NA	650.438
Ano10	9538.73	9395.65	8135.56	10212.5	9563.45	9152.95	9917.32	9408.82	10088.8	10261.1	10075.9	8627.53	9635.34	9841.19	8776.09	9949.72	9581.3	7314.29	8086.17	9490.79	8070.98	8554.29	9122.47	7054.06	7347.35	7355.65	8430.77	9379.69	9016.72	8290.86
RtcA	7571.13	7710.17	7058.73	7879.02	7525.39	7456.91	7800.68	7181.61	6529.18	8785.87	6684.96	6900.4	7914.84	7483.5	10707.9	10992.1	7949.83	8535.96	9366.47	10076.5	8993.46	8587.21	8220.07	9875.86	9679.2	8626	8733.44	10275.3	9910.53	10356.1
Hsd17b12	56647.9	66159.7	82006	62094.1	71332.8	62175.1	77795.8	74148.2	72334.1	64295.9	69681.8	62145.6	66500.8	69983.8	42256.7	38325.2	40910	40947.9	40530.5	38987.1	38535.4	37438.4	40204.5	34926.7	32581.2	38868.6	39710.9	39760.6	40081.2	39748.5
Slc12a9	2923.1	3303.4	3890.28	3046.61	3620.28	4007.03	4071.04	4035.42	3797.59	3686.83	3389.72	3598.52	4252.78	4402.02	2558.33	2226.36	3440.72	2868.57	2715.83	2117.32	3038.25	3780.86	2722.26	2631.57	2609.78	2505.55	3153.6	2358.24	2504.31	2412.24
Pgm3	28839	30159.5	27384.1	27650	28476.7	26316	28347.1	26626	25190.1	27845.6	28997.9	25816.8	38636.1	31622.7	28184.5	28202.8	27265.1	25862.6	28294.7	26445	29801.8	27334.5	30261.2	27175.8	27351.1	28784.3	26947.1	31084.4	29299.3	26453.3
Abr	8211.93	9066.98	8748.22	9558.28	9170.66	9024.85	9080.88	9525.34	9416.21	9928.3	9935.57	10402.1	9839.03	9467.95	8745.29	8224.54	9720.84	9145.39	7675.27	9123.28	10459.8	10222.5	8777.98	10384	8506.97	10007.1	7662.94	7579.09	9465.38	9209.6
Acadl	46402.5	46963.1	42346.5	40766.9	39374.4	36769.2	38343	41778.8	48022.9	44376.8	57497.6	52770.3	39008.5	40139	53282.4	50402.7	56006.9	56464.8	60063.5	59268.1	47879.8	48895.3	47129.3	44077.5	44467	47427.4	55269.8	47051.2	53193.6	49837.3
C1qbp	13124	13909.1	15388.3	14798.2	13613	19204.7	12943.4	15552.7	15569	12869.2	12155.2	10176	16358.7	12219	14763.3	20645.7	14682.2	18744.6	15313	23957.3	13459.6	12648.7	12031.5	13890.8	13368	12467.6	14181	16947.1	14575.1	17839.5
Vps45	7841.88	8832.11	8763.41	8336.76	8560.2	8143.1	9044.1	8497.95	9319.8	7945.88	8428.51	8113.11	6287.51	7757.06	6285.06	6187.06	6642.03	5871.23	6094.38	6051.38	5895.19	6559.54	6185.84	6500.2	6198.75	6932.87	5424.75	5890.82	5705.12	6934.02
Mon2	3411.53	3680.75	3363.01	3753.02	3729.78	4151.93	3595.58	3794.26	3433.45	3849.56	3330.5	3503.46	4382.25	3900.02	2299.61	2479.77	2329.59	2202.31	2509.85	2474	2604.62	2398.67	2912.62	2326.72	2581.93	3046.24	2180.3	2471.34	2650.53	2294.72
Tuba1c;Tuba4a;Tuba8	18074.8	17565.8	29302	18965.6	10035.8	10182	22802.7	29735.3	32499.8	28771.8	18743.5	27918.9	18129.3	15740.1	48017.4	39709.1	18418.7	20176.2	42685.2	26338.5	31589.6	33365.4	49241.9	45044.3	42144.1	42551	37797.7	27168.3	38398.9	54225.3
Tuba1c;Tuba3a;Tuba4a;Tuba8	2191040	2069850	2230600	1912820	1651890	1878320	2001710	2174870	1945200	1925410	1933950	2302920	2148160	2034230	2456660	2358890	2277230	2386950	2178410	2189790	2375670	2458890	2638380	2826260	2684850	2449270	2200210	2028250	2072200	2582900
Selenom	9129.81	7564.12	8352.4	7170.94	7303.26	5872.3	6734.81	7260.02	8187.07	7681.2	7803.75	5896.74	5368.93	7356.02	7381.78	8105.22	4935.85	5089.05	5943.61	7085.66	8542.37	7262.73	9305.12	7865.23	6903.18	9178.37	6866.24	6939.12	8458.59	7090.92
Alg13	339.004	386.742	544.29	457.398	793.605	138.511	NA	200.62	178.244	606.572	489.938	421.339	218.052	341.539	350.987	NA	NA	NA	NA	NA	297.585	1203.12	NA	209.847	417.72	436.798	546.575	413.264	667.531	887.289
Psme2	16956.5	20477.5	18378.3	16153.2	17481.2	16697.5	15880.5	16838.7	16196.9	17540.6	17429.1	16602.9	16526	17371.8	16581.3	15987.8	12565.6	13527.2	12420.5	14749.2	13181.8	13853.7	12414.3	14228.8	13727.5	14916.4	16498.2	16462.5	18545.5	16506.7
Crtap	8710.71	8872.93	7743.78	10742	9970.67	8356.78	10749.6	11362	9104.71	10261.6	7772.75	7457.62	8140.33	9409.3	2627.47	3092.16	3713.4	2958.67	2629.14	2060.72	3112.48	3349.05	3986.35	2888.41	2681.04	2174.09	2162.76	2601.19	2004.79	1982.55
Pick1	952.199	853.726	601.696	761.344	732.156	877.074	634.592	1148.08	1154.73	709.292	1521.52	686.273	686.034	1093.41	991.665	1356.09	915.846	932.368	1065.48	1112.6	1066.12	1126.15	1308.37	905.274	1180.91	1238.28	662.378	1509.53	428.75	986.779
Them6	7124.02	7611.5	7640.24	7525.57	7678.95	6569.68	8374.18	7901.26	8676.7	6966.33	8884.38	7912.86	6993.53	8038.44	9807.46	8310.42	10316.5	8506.71	8724.73	7109.21	8847.51	6237.16	8111.09	7808.36	8177.2	8970.21	7728.52	7947.11	7682.05	5680.93
Pdlim7	30905.4	29035.9	15213.3	12861.6	17800.5	17231.9	19380.9	17022.7	18017.8	20926.4	30534.6	26120.4	24519.7	22992.4	41240.4	41833	42594.9	43081.1	38747.5	36403.9	34361.5	21148.3	27597.4	24860.6	29676.5	30213.6	45304.7	42963.1	61470.1	72962.4
Alox5	2980.24	3198.06	2615.09	2408.22	2329.64	2572.81	2681.69	3040.5	2523.02	2796.11	2884.2	3104.81	1857.48	2534.51	2981.58	3006.58	3027.71	2362.28	4228.91	3400.03	3469.52	3165.92	2413.61	2041.23	2882.83	2466.47	2624.33	3063.37	2980.08	3046.8
Oat	50449.6	48664.4	47903.5	45288.9	43321.6	40931	46444.5	40193.8	47896.5	45118.3	45672	42515.4	45328.1	36399.9	40336.3	39205.7	36322.3	35629	44463.2	43974.4	36662.5	39447.4	42018.8	41075.8	38629.1	38537.4	44394.6	42933.3	45983.1	45855.7
Hspa1l	47012.8	41466.1	35984.3	39179.3	35147.8	30731.7	31530.8	26150.9	32043.3	28582.4	33009.8	33117.8	32230.7	32546.9	40515	52524.8	54880.7	57214	47589.1	47878.9	47583.4	51530.4	41361.6	37362.4	38434.6	38958.6	40124.9	35894.5	44393.7	40168
Cltb	34733.9	31760.5	61311.5	62475.6	58604.9	58760.5	48131.9	44835.2	62638.2	57302.1	57953.3	57312.9	55404	70941.3	40551.7	44082.9	43860.7	46180.8	46989.6	43449.8	40742.7	41002.6	42165.5	57731.1	40502.2	42495	63175.1	61752.6	41177.7	39748.7
Cmpk2	9854.01	10888.4	9907.96	8270.59	9232.36	8950.96	10054.6	9530.97	8498.61	8500.7	10733.8	10993.9	12480.2	10939.4	13930	13998.9	13125.1	12031	12072.1	12619.5	13703.9	12030.6	15229.2	16561.8	19418.6	18528.6	17792.6	18252.4	16256.3	15687.2
Nfkb2	3373.93	3020.4	3075.13	3022.49	3318.36	3093.64	3086.02	3274.57	3248.28	3185.04	3279.23	3264.02	2751.66	3280.08	2654.21	2874.78	3000.24	2135.14	1604.43	2616.62	2514.29	2663.27	2462.38	2659.07	2845.11	2476.59	2554.58	2737.18	2412.65	2555.08
Pctp	3016.16	4309.04	3543.6	3243.09	2689.73	4056.82	2326.08	3213.17	4092.8	2216.98	2972.13	2938.58	3242.9	5405.6	4403.96	7927.88	3872.1	4632.61	6237.45	5353.74	6461.94	5075.71	5290.55	6170.52	7195.34	6421.85	6627.85	6849.17	7006.36	8660.13
Eno2	153317	158845	158886	136281	130906	122802	132883	132255	137471	136624	132858	154378	147220	127441	274471	252559	225077	224411	251395	250415	219960	211319	261816	272101	280498	259275	257847	239355	245528	255357
Syngr3	2877.33	4003.52	3236.73	3983.91	2191.43	3951.82	3450.42	3781.02	2890.27	4549.72	4407.83	3106.32	5064.56	4162.12	3860.45	3807	4923.9	3626.52	2732.18	2977.71	3338.12	3208.98	3073.26	2050.67	2872.67	4907.84	1946.71	4218.05	2355.38	1582.55
Abcb7	3411.51	3626.81	3383.99	3300.6	3558.19	3418.06	3892.03	3385.96	3792.58	4652.65	3630.28	3904.43	3452.78	3155.97	3336.78	2752.37	3600.34	3157.93	4068.68	4656.63	3350.53	3113.51	3206.06	2821.79	2625.8	2898.03	4408.47	4050.4	4041.39	3906.59
Bcam	97294.2	93250	90020.2	85643.5	85168.1	88710.4	86172	89860.2	83052.3	84332	94831.2	96860.3	88572.4	91262.3	186296	174770	181036	182909	162838	168010	162621	164029	169821	169784	162538	149692	166624	166639	163102	178505
Selenoo	6853.2	4992.87	6337	6365.91	6090.32	5612.88	6243.4	5803.16	5184.22	5601.96	5621.08	6721.66	7863.68	6369.87	7267.72	7637.26	6265.56	5688.29	7133.85	7361.35	7210.65	6963.14	7615.09	7179.23	7246.51	6860.47	5892.46	8510.99	6615.96	7933.09
Alad	37320.6	36330.2	40089.3	37799.4	36434	32523.5	35703.5	36847.9	34928.5	33730.9	32861.9	30408.5	32332.9	33755	27480.7	29737.9	26585.9	26804.1	26364	27401.7	22894.5	25327.2	26869.7	27007.6	27813.2	28546.8	30001.3	31385.9	28526.7	24175.6
Htatip2	3725.7	3238.92	3088.62	2466.97	2440.24	2470.96	3570.13	3058.42	2940.48	2380.53	2826.53	3203.94	1812.68	3199.35	4123.31	3508.27	3914.5	4321.29	3561.62	2334.36	4356.77	4333.23	4302.03	3012.58	2595.14	5191.36	3585.22	2528.01	4172.52	3420.14
Mylpf	28003	46706.3	44040.8	38345.1	452367	458800	123266	112131	994711	917956	1375310	1381860	35408.1	40201.8	955533	893902	850643	790175	2901600	2501990	145655	155512	4698.49	4930.55	553934	559825	2745540	2415340	1714040	1831850
Tradd	2708.13	2511	2023.32	2493.74	2849.05	3525.06	2159.76	1579.03	1971.48	2607.95	2700.23	2441.12	1752.6	2180.95	2054.54	1705.9	1687.28	2110.62	1971.25	2190.53	2208.61	2497.3	1689.63	2271.96	2425.48	2684	2293.42	2872.57	2088.51	2221.77
Atp5mk	11007.6	10866	9340.87	10104.4	8837.31	9783.79	10657.9	9427.29	9726.98	11906.8	9854.49	9710.57	8854.74	7644.02	16859.5	16657.2	18558.4	18061.1	14959.2	18156.6	15880.9	16155.4	7878.38	9755.33	15368.4	13130.7	13811.6	14663.7	17504.4	17230.5
Srp54	8990.31	9326.69	10597	10681.8	9668.61	10297.5	10645.3	10679.8	9734.69	9263.26	9584.26	8607.05	10290.5	8937.29	5845.01	6513.19	4817.59	6293.08	6046.68	6046.88	5291.36	6721.6	5825.32	6218.01	5670.1	7583.85	6526.6	6656.49	6659.08	6091.09
Ppp2r2a	23700.3	21278.7	21624.4	24158.3	17868.5	19115.3	20132	21470.4	21053	21559.8	20036	21162.2	16368.3	18121.5	22994	25523.9	20246.9	23946.9	23003.5	21600.1	18850.6	20093.8	24051.2	22029.6	23119.7	23546.2	25462.2	20930.5	20217.4	21635.2
Mri1	12507.2	12085.5	10705.8	12511.2	9223.64	9946.08	9280.58	10603.2	10522.8	12021.8	10686.6	10360.5	9659.31	10120.8	10831.3	10786	9799.33	9188.59	11714.6	11830.5	10060.7	11634.1	10751.2	10277.5	11872.7	9479.67	11569.4	13918.5	9755.32	11488.6
Mdh2	273680	279361	301316	256726	282874	284508	299164	305987	351360	328788	409406	397669	316952	345113	396501	366013	451751	428795	521756	475878	388583	386416	348003	354348	353333	349807	480374	449886	394350	422521
Wls	1741.98	1120.09	1285.77	1865.33	970.654	1482.73	1158.44	1120.2	NA	1357.86	1336.99	1253.8	NA	1872.58	NA	1392.02	NA	1176.19	1126.03	NA	1331.32	2653.44	NA	NA	672.318	NA	2001.93	1402.5	1108.24	NA
Ephb2	7275.7	8492.28	6664.03	6618.17	5864.16	6519.06	5166.65	6003.06	7133.27	6619.44	7486.51	6681.04	7463.25	5661.45	7669.18	8442.02	6345.31	7892.26	6164.91	7299.75	6682.35	7970.2	6717.35	7449.18	6900.45	7326.34	6152.88	6480.09	8116.48	6999.25
Upf1	16663.1	15885.5	16360.4	15843.7	15431.1	16196	16046.5	17072.3	16893	15259.1	17291.8	16177.2	16585.3	15573.7	13584.7	11701.5	10796.5	11788.7	12015.2	12315.6	12715.2	12600	12574.7	12176.1	12680.4	13212.9	12300.1	11377.9	12700.8	12907.4
Metap1d	1149.94	552.345	414.464	980.202	886.901	631.896	762.511	1073.51	2022.22	523.037	893.097	1091.81	896.655	1253.17	709.406	654.167	528.227	677.387	NA	714.024	380.048	NA	NA	749.064	NA	NA	NA	918.409	NA	817.002
Plcb1	8934.08	8652.06	9866.6	9656.02	10034.7	10363.6	8019.11	9460.35	9327.38	10208.8	9820.25	9820.1	10304.1	9686.72	11730	12302.4	12060.4	9873.93	10501.3	11133.7	11231.8	11814.6	10328	10956.1	10754.9	11509.3	9485.92	10990.7	10076.5	10112.8
Plcb3	21279	21839.5	20617.4	19031.6	20762.5	20976.3	18045.6	19508.5	21397.6	20237.8	21602.7	20872.4	20658.7	21791.2	27832.2	27117.7	27131.9	28328.3	25917.2	25559	27753.4	28951.7	29583.8	30118.5	25477.7	25086	23011.1	25698.5	27589.6	29353.2
Dctn4	11670.9	11993.1	12702.4	12977.7	12271.2	11887.6	11468.9	12029.7	12400.1	12123.3	10875.9	11093.9	12210	11854.8	11316.8	11129.6	11359.3	10980.8	11761.7	10695.9	10648.5	11496.2	10623.7	11797.7	11424.4	12063.2	11076.4	10260.2	11008.3	10585.2
Map7d1	25906.7	25763	24542.8	27898.6	27369	28260.3	27212.2	27345	28018.2	29800.8	25234.3	27488.3	23705.9	26758.9	24327.1	29127.4	29460.4	31622.8	26995	30006.7	29128	26589.5	29667.2	27032.9	29012.3	27331.7	26224.4	27341.1	27918.8	27405.6
Tmem160	2560.31	2853.52	1932.23	2813.05	2476.29	3613.99	3343.3	3484.97	2083.69	2576.94	4932.77	4216.09	3793.86	3873.52	NA	3513.99	3926.82	2257.48	2309.14	1582.14	4161.66	2896.36	1215.07	2542.31	7938.92	NA	3466.03	3584.03	1697.52	3146.98
Ctu1	412.137	633.996	782.67	976.76	896.159	686.947	397.395	632.229	503.651	435.699	NA	NA	NA	642.483	NA	441.129	618.439	216.093	NA	420.875	NA	634.476	467.605	NA	NA	289.302	NA	300.532	655.006	NA
Glb1	12208.8	12368.3	12486.3	12242.2	11378.7	10980.2	10739.2	12504.9	11387.9	11049	10074.6	10905.2	11481.7	10899	7547.08	7108.72	5669.66	5748.7	6908.86	7106.57	8197.12	7605.27	6192.95	7502.9	6346	6942.22	6779.85	6978.42	7997.63	7431.63
Dync1li1	33602.8	32641.6	36077.9	32621.7	34428.7	34640.1	31568.3	32991.5	36528	34364.7	32274.5	30673.9	31814.3	30621.7	32568.4	33242	32985	34590	34828.3	31291.5	29456.5	28856.7	32509.3	32942.6	34530.1	33422.3	30550.5	31142	33296.5	34411.6
Dhrs1	36896	33841.9	42349.7	42398.6	37315.6	37714.2	39589.3	43832.9	35745.9	34915.3	35513.5	36820	37838.2	35496.8	23709.1	23813.3	23151.5	23202.3	19372	22414	22547.9	23044.4	22069.4	24682.5	26038.7	24760	26833.5	28905.8	22001.3	26654.3
Abcb1a	13373.2	13715.9	11661.9	12143.8	11917.5	11935.8	11770.7	11280.4	11445.4	11735.5	12700.9	13693.9	14604.6	14433.5	25609.4	27639.4	27882.3	29770.9	25119.4	25424.5	25184.4	26433.5	25092.9	25289.7	22236.5	26273.7	24490.4	24638.8	26076.1	24643.9
Tnks1bp1	15517	14606.7	14319.8	14964.9	14615.8	15157.5	13228.8	14493.5	14449.8	15317.5	13098.2	13909.3	14127.9	13971.7	12624.6	13861.3	13064.6	13478.7	11762.1	11888.2	11974.9	13003.9	12876.3	12831.3	12602.9	12916.8	12709	14112.8	13346.3	13201.8
Srpra	4538.26	4971.42	4402.05	4577.21	4780.83	4099.95	5495.86	5248.64	5419.06	4758.15	4796.06	5968.67	5319.23	4934.97	3504.04	3502.56	3339.15	3886.62	3746.38	3209.79	3372.41	3087.17	3517.14	2571.55	3265.63	3586.82	4485.62	4498.37	3971.33	3065.66
Camk2a;Camk2b;Camk2d;Camk2g	51273.1	49319	57488.3	60543.3	56017.6	57735.4	60062.5	59281.9	61308.8	62773	58536.2	61881.8	57535.4	59548.1	74627.3	76695.2	76369.4	91807.6	71325.6	62728.7	71344.4	72338.7	65049.6	69586.6	62354.3	67712.4	67970	66114.3	62632.2	65568.9
Txnl1	38708.8	40627.9	41646.6	39697.7	41786.6	38797.8	35377.5	34972.3	40905.8	37024.3	38371	40066.8	34163.6	37280.3	43312.5	44313.4	45129.9	46312.9	43987.5	43069.4	49503.1	44394.3	48926	47318.3	47304.5	46532.5	45143.8	44407.8	46521.8	41432.1
Ppm1e	2356.87	2417.69	2431.55	2157.35	2169.48	2153.99	1857.04	2142.64	2133.17	2696.28	2859.53	2071.49	2455.84	2210.18	2851.43	3540.32	3393.48	3249.62	2428.82	3326.6	3013.3	2688.51	2894.71	3922.28	3814.8	3574.97	3637.32	3303	2900.68	2709.46
Sbspon	117246	112844	117682	124065	120015	106962	123876	119579	109532	115729	155390	177267	144927	147253	174641	189001	192442	192951	159798	162168	152863	148306	160950	178521	156314	153140	171667	184830	149419	149496
Dmxl1	1716.73	1718.55	1913.35	2059.53	1976.08	1998.25	1799.43	2088.53	1728.3	1767.01	1676.08	2246.75	2255.87	1904.13	1587.47	1359.32	1591.15	1858.99	1234.61	1165.57	1340.86	1858.42	1453.42	1697.76	1393.77	1639.7	1431.27	1727.55	1633.74	1519.37
Slc5a3	1731.66	1583.94	1626.67	1641.3	1760.24	1730.86	1308.35	1922.05	1342.34	1391.99	1898.84	2293.72	1572.86	2168.9	1779.14	1934.55	2214.3	1602.15	1571.67	2159.34	1237.33	1658.34	1210.46	1916.24	1642.72	1842.51	2210.56	2584.68	1850.54	2314.48
[truncated: 6,726 more rows]

## Sheet: SCN_DifferentialAnalysis
	q value				Log2FC
[truncated: 6,828 more rows]

## Sheet: Age-Dependent_641CommonDEPs
	q value		Log2FC			Cut-offs	q value ≤ 0.05
[truncated: 642 more rows]

## Sheet: Age-Dependent_288UniqueDEPs_Fe
	SCN_Fe4w/SCN_Fe14w					Cut-offs	q value ≤ 0.05
Gene Name	q value	log2FC					Abs.log2FC ≥ 0.585
[truncated: 288 more rows]

## Sheet: Age-Dependent_628UniqueDEPs_Ma
	SCN_Ma4w/SCN_Ma14w					Cut-offs	q value ≤ 0.05
[truncated: 629 more rows]

[truncated: 1 more sheets: Sex-Dependent_33DEPs_14w]
