# Supplementary material for: Deep proteome profiling reveals signatures of age and sex differences in paw skin and sciatic nerve of naïve mice
Source: eLife. 2022 Nov 30;11:e81431. doi: 10.7554/eLife.81431 (PMC9711526; doi:10.7554/eLife.81431)
Supplement: Figure 2—source data 1. [file elife-81431-fig2-data1.xlsx]

## Sheet: ProteinsExcludedInSCN
Myelin proteins excluded in SCN dataset	Reference: doi:10.7554/eLife.51406
Gene Name
Atp5a1
Atp5b
Atp5c1
Atp5d
Atp5f1
Atp5h
Atp5i
Atp5j2
Atp5l
Atp5o
Calm1
Carkd
Cox6a1
D10Jhu81e
Dars
Eprs
Fabp9
Fam129a
Fam129b
Fam213a
Fam49b
Fndc9
Gapdhs
Gnat2
Gnb2l1
Gstp2
Gypc
H1f0
Hist1h1a
Hist1h1b
Hist1h1e
Hist1h3a
Hist1h3b
Hist1h4a
Hrsp12
Hspa1a
Kiaa1045
Ldhc
Marc2
Mcts2
Mpp6
Mtco1
Nnt
Ppp2r4
Prune
Ptrf
Rars
Sars
Sdpr
Sept11
Sept2
Sept6
Sept7
Sept8
Sept9
Slc25a31
SPIKE
Tomm70a
TRYPSIN
Ufd1l
Usmg5
Wars
Yars
