# Supplementary material for: Deep proteome profiling reveals signatures of age and sex differences in paw skin and sciatic nerve of naïve mice
Source: eLife. 2022 Nov 30;11:e81431. doi: 10.7554/eLife.81431 (PMC9711526; doi:10.7554/eLife.81431)
Supplement: Figure 3—source data 1. [file elife-81431-fig3-data1.xlsx]

## Sheet: Sheet1
Comparing ligands and neuronal receptors found in skin ( doi: 10.1126/scisignal.abe1648, supplementary table 2, cluster G) with paw skin proteome										Proteins with age-dependent significance in both sexes
	q value				log2FC					q value ≤ 0.05
Gene Name	Skin_Fe4w/Skin_Fe14w	Skin_Ma4w/Skin_Ma14w	Skin_Ma4w/Skin_Fe4w	Skin_Ma14w/Skin_Fe14w	Skin_Fe4w/Skin_Fe14w	Skin_Ma4w/Skin_Ma14w	Skin_Ma4w/Skin_Fe4w	Skin_Ma14w/Skin_Fe14w
Agrn	0.788384	0.95039	0.727762	0.765901	-0.0736357	0.036223	-0.130768	-0.240626
Agt	0.26299	0.268083	0.892414	0.393638	0.411357	0.68487	-0.171009	-0.444522
Angptl2	0.868061	0.458484	0.759619	0.797791	-0.0431191	0.296066	0.138673	-0.200512
Apod	0.166956	0.159514	0.884752	0.754247	-0.51792	-1.02232	-0.171488	0.33291
Bcam	0.411446	0.304215	0.69647	0.901227	-0.212971	-0.551164	-0.189359	0.148835
Bmp1	0.420245	0.330744	0.389853	0.970761	0.359504	0.795524	0.518494	0.082474
C3	0.811408	0.720271	0.731416	0.332919	-0.102374	0.276282	-0.316454	-0.69511
Cachd1	0.671492	0.878252	0.759128	0.925617	0.149698	-0.119904	-0.116845	0.152757
Cadm4	0.569251	0.806489	0.603612	0.937471	0.179452	-0.315184	-0.323038	0.171599
Calcrl	0.16477	0.971872	0.32651	0.926829	0.440839	0.064577	-0.608214	-0.231952
Casp3	0.666869	0.55925	0.760395	0.752406	-0.1012	0.430874	0.117886	-0.414189
Cav1	0.672577	0.81121	0.877416	0.881594	0.0924938	-0.13661	-0.0758401	0.153263
Cd14	0.746631	0.868087	0.59079	0.908659	0.11005	0.205202	0.326642	0.23149
Cd151	0.823427	0.84352	0.999722	0.868481	-0.0879829	0.218693	-0.000473451	-0.307149
Cd180	0.0864727	0.791919	0.32626	0.640442	-0.792592	0.125729	0.421941	-0.496379
Cd34	0.883596	0.508744	0.988271	0.793652	0.0605979	0.411732	0.00887987	-0.342255
Cd44	0.1729	0.924042	0.35992	0.941879	-0.307318	0.0494137	0.294069	-0.0626631
Cd47	0.999416	0.867516	0.62992	0.937471	-0.000356035	-0.107971	-0.193972	-0.0863565
Cd48	0.408795	0.638409	0.922609	0.644439	-0.419437	0.327882	0.048225	-0.699093
Cd63	0.557739	0.849459	0.712886	0.815878	0.175809	0.136322	0.215518	0.255006
Cd81	0.32786	0.884547	0.891563	0.760705	-0.314798	0.0989071	0.0803696	-0.333335
Cd82	0.263889	0.436466	0.688327	0.913524	-0.36688	-0.377691	-0.165758	-0.154947
Cd9	0.239523	0.748983	0.929695	0.957486	-0.325107	-0.197666	0.05513	-0.0723114
Cdh1	0.0668561	0.541121	0.90665	0.943514	-0.379853	-0.260118	0.0584843	-0.0612507
Celsr2	0.297014	0.48301	0.998852	0.955186	-0.279861	-0.228181	0.00153995	-0.05014
Cfh	0.0623625	0.981514	0.409443	0.924692	-0.405344	-0.0303738	0.520471	0.145501
Cgn	0.353434	0.644343	0.505601	0.407407	-0.211926	-0.174331	-0.31842	-0.356014
Cmklr1	0.227092	0.591176	0.603034	0.830224	-0.381199	-0.426588	-0.361068	-0.315678
Col18a1	0.242808	0.444837	0.824174	0.649132	-0.20773	-0.385536	0.128411	0.306217
Col1a1	0.00601126	0.00612997	0.35617	0.00585686	2.01627	1.54175	0.972434	1.44695
Col1a2	0.00294759	0.0062647	0.495932	0.0324774	2.05668	1.68398	0.663517	1.03622
Col3a1	0.000800978	0.00612997	0.359374	0.231524	2.77337	2.65539	0.747451	0.865425
Col4a1	0.0784773	0.999961	0.686453	0.672919	0.581936	-0.000207141	-0.227932	0.354211
Col5a1	0.0129636	0.0566058	0.347097	0.03586	1.33024	1.0018	0.750384	1.07882
Col5a2	0.00484867	0.0325212	0.549415	0.132481	1.31658	1.0123	0.385111	0.68939
Col6a1	0.955801	0.931662	0.969123	0.978893	-0.0125249	-0.070885	-0.0255506	0.0328095
Col6a2	0.84853	0.994168	0.953024	0.988224	0.0432841	-0.00915889	-0.0343148	0.0181282
Col7a1	0.282912	0.490171	0.992005	0.854037	-0.248552	-0.451137	0.00804647	0.210631
Cp	0.350291	0.99239	0.844604	0.599317	-0.202065	-0.0118328	-0.162374	-0.352606
Csf1r	0.840703	0.894567	0.98844	0.966825	-0.0622847	-0.10381	0.0108122	0.0523373
Ctnnb1	0.406121	0.621457	0.96359	0.998738	-0.183728	-0.19798	-0.0210547	-0.00680272
Ddr1	0.341875	0.955566	0.982046	0.798866	-0.237499	0.0620579	-0.0133291	-0.312885
Dlg1	0.243116	0.876746	0.841816	0.79562	-0.201948	0.0934631	0.0768775	-0.218533
Dlg3	0.872794	0.984305	0.939446	0.884783	-0.0473167	0.0161481	-0.0686385	-0.132103
Dsc2	0.0630351	0.56089	0.128893	0.514524	-0.50965	-0.379778	0.677056	0.547184
Dsg2	0.193797	0.843228	0.591722	0.832321	-0.294884	0.123429	0.201463	-0.216849
Eng	0.899976	0.808105	0.612746	0.884783	-0.0477421	0.125105	0.314319	0.141472
Epha2	0.145927	0.0783603	0.424082	0.935925	-0.395848	-0.60258	-0.283711	-0.0769785
Ephb3	0.689655	0.984394	0.802059	0.999629	-0.124289	0.0113877	0.135317	-0.00035949
Ephb6	0.110254	0.832357	0.667536	0.926829	-0.462575	-0.123317	0.237751	-0.101507
Erbb2	0.274932	0.944754	0.931878	0.762309	-0.211851	-0.0403703	-0.0444912	-0.215972
Erbb3	0.355851	0.697109	0.605257	0.895152	-0.258146	-0.266991	-0.211999	-0.203153
Esam	0.139936	0.884812	0.923309	0.728908	0.732226	0.133763	-0.109573	0.48889
F10	0.176064	0.79784	0.843977	0.93266	-0.46937	-0.180187	0.197661	-0.0915229
F11r	0.377171	0.99188	0.798166	0.909468	-0.235687	-0.00741482	0.11372	-0.114552
F13a1	0.0697246	0.374447	0.803345	0.935925	-0.476187	-0.301771	0.0983987	-0.0760171
F2	0.386778	0.752885	0.952752	0.925898	-0.239191	-0.193414	-0.0517052	-0.0974824
F3	0.0926647	0.66873	0.675792	0.0955587	-0.519222	-0.163323	-0.258583	-0.614482
Farp2	0.69713	0.940275	0.868107	0.967761	-0.0881928	0.04781	0.0934357	-0.0425671
Fbln1	0.805739	0.706066	0.641306	0.715099	-0.0556653	-0.154196	0.15748	0.256011
Fbln2	0.603105	0.239497	0.421198	0.573561	-0.120993	0.558171	0.295799	-0.383365
Fgfr2	0.661651	0.627607	0.923309	0.818572	0.260348	-0.238586	-0.0888522	0.410081
Fmod	0.719344	0.413464	0.917731	0.22971	0.200411	-0.537624	0.144494	0.88253
Gpc1	0.895965	0.859144	0.605257	0.943234	-0.0606082	0.111735	0.266917	0.094574
Gpc4	0.949397	0.431834	0.302023	0.89564	-0.0146282	-0.248584	-0.335283	-0.101327
Grb2	0.744219	0.903072	0.900105	0.926829	-0.0738285	0.0820062	0.0490516	-0.106783
Hspg2	0.548506	0.978153	0.876088	0.932878	0.126276	-0.0198261	-0.0680534	0.0780487
Icam2	0.261612	0.530788	0.35617	0.754247	1.08084	-0.288709	-0.376797	0.992749
Igf2r	0.753745	0.67268	0.785136	0.869544	-0.0730916	0.174938	0.0932947	-0.154735
Il16	0.393984	0.64069	0.774457	0.924707	-0.460843	-0.518764	0.210286	0.268208
Il1r2	0.912822	0.705506	0.622459	0.948028	0.0468527	-0.178538	-0.299607	-0.0742167
Il1rap	0.251999	0.978153	0.675792	0.956878	-0.192401	0.0231555	0.16133	-0.0542267
Il1rn	0.211455	0.59664	0.886877	0.984335	-0.360212	-0.259413	0.0742504	-0.0265478
Il6st	0.679202	0.916356	0.69647	0.913524	0.119097	0.0894293	-0.18306	-0.153392
Insr	0.967619	0.828653	0.963623	0.844757	0.0160136	-0.144369	0.041068	0.20145
Itga1	0.287349	0.451499	0.472736	0.731949	0.258066	-0.340911	-0.291544	0.307433
Itga2	0.938533	0.639631	0.888843	0.927643	0.0225873	0.180401	0.0687043	-0.0891091
Itga3	0.786283	0.998756	0.691142	0.791493	0.0716959	0.00097372	0.162779	0.233501
Itga5	0.368438	0.566607	0.965488	0.938777	0.270125	0.343932	-0.0285011	-0.102308
Itga6	0.11143	0.583807	0.794219	0.985163	-0.347699	-0.235636	0.130333	0.0182706
Itga7	0.416255	0.622868	0.614954	0.820624	0.231693	-0.320568	-0.273618	0.278642
Itgam	0.0697172	0.242047	0.389853	0.640442	-0.735197	-1.07338	0.3574	0.695582
Itgav	0.079295	0.720873	0.967446	0.798891	0.31587	0.146669	0.0159022	0.185103
Itgb1	0.572385	0.915638	0.827515	0.974612	-0.0999257	-0.0595132	0.071123	0.0307106
Itgb3	0.270818	0.126927	0.840311	0.770306	0.329293	0.735547	0.128456	-0.277797
Itgb4	0.0832514	0.724484	0.727762	0.992729	-0.353842	-0.175645	0.165347	-0.01285
Itgb5	0.720888	0.928194	0.922408	0.985561	-0.120769	-0.0561822	0.0832841	0.018697
Jam3	0.672577	0.394272	0.737469	0.731949	0.153489	-0.398115	-0.217767	0.333836
Jup	0.0456349	0.56253	0.641306	0.96232	-0.550632	-0.287167	0.204891	-0.0585734
Lama3	0.0763061	0.562678	0.900029	0.978893	-0.447386	-0.37293	0.108578	0.0341216
Lama4	0.279606	0.973813	0.722567	0.913524	0.30512	0.0317947	-0.11474	0.158585
Lama5	0.354477	0.490171	0.918873	0.896405	-0.161831	-0.347429	-0.0555214	0.130077
Lamb1	0.00499877	0.215575	0.959362	0.970761	0.663506	0.645541	0.0234233	0.0413888
Lamb2	0.878027	0.40533	0.959229	0.514524	0.0387194	-0.30487	0.0205943	0.364184
Lamb3	0.0666944	0.632366	0.865536	0.965812	-0.411514	-0.322963	0.145966	0.0574149
Lamc2	0.126419	0.62338	0.822395	0.857848	-0.350327	-0.357242	0.19286	0.199775
Ldlr	0.537398	0.431834	0.577764	0.794407	0.134734	-0.298173	-0.239938	0.192969
Lifr	0.0763061	0.938262	0.972345	0.401692	0.532049	0.0679371	0.0298852	0.493997
Lrp1	0.444083	0.438721	0.95201	0.930963	0.162344	0.266847	0.0264696	-0.0780328
Lrp4	0.919778	0.681917	0.5236	0.970818	0.0349096	-0.189618	-0.268219	-0.0436915
Lum	0.978569	0.219749	0.979239	0.347051	0.00998588	-0.451895	0.0154593	0.477341
Mag	0.554095	0.875494	0.569809	0.981093	0.226207	-0.186483	-0.36488	0.0478097
Maged1	0.146318	0.274793	0.970025	0.830224	0.515095	0.817431	0.0463166	-0.25602
Magi1	0.584658	0.58895	0.991347	0.949289	-0.194916	-0.259185	0.0081759	0.0724448
Mfap2	0.209519	0.905859	0.762006	0.835757	0.614372	0.080298	-0.262191	0.271883
Mfap5	0.0182393	0.00612997	0.281996	0.318689	-1.21654	-1.31356	-0.688235	-0.59122
Mmp2	0.0130677	0.894903	0.838513	0.0891767	0.879145	0.0706626	-0.129219	0.679263
Mrc2	0.00864282	0.0418926	0.604685	0.754247	0.898684	0.921748	0.273639	0.250575
Ncam1	0.181275	0.929733	0.612746	0.978893	0.295729	0.077116	-0.178384	0.0402287
Nid1	0.111825	0.528898	0.872576	0.243281	0.307709	-0.230908	-0.0645874	0.474029
Notch2	0.840482	0.971096	0.861249	0.948028	0.0741513	0.0324601	-0.12146	-0.0797689
Nrp1	0.673722	0.966334	0.688327	0.965957	0.0977977	-0.0258291	-0.166581	-0.0429538
Ocln	0.815916	0.934668	0.905843	0.949489	0.113939	0.181548	-0.122286	-0.189895
Ogn	0.468858	0.213728	0.694189	0.216384	0.149742	-0.623228	-0.120236	0.652734
Pdgfra	0.0627383	0.59664	0.567383	0.978893	0.518839	0.251371	-0.235289	0.0321796
Pdgfrb	0.139861	0.656465	0.612746	0.985132	0.356607	0.182368	-0.194407	-0.0201676
Pecam1	0.701384	0.744607	0.918674	0.998806	0.126735	0.182407	0.0641473	0.00847596
Pf4	0.563792	0.790574	0.762006	0.86634	0.272071	-0.232732	-0.187359	0.317444
Pgrmc1	0.888224	0.339242	0.803345	0.868481	-0.0729698	-0.479064	-0.155699	0.250395
Plxna1	0.977759	0.795855	0.707769	0.930692	-0.010735	-0.127646	-0.207726	-0.0908155
Plxnb2	0.620333	0.84352	0.888843	0.876772	-0.0887052	0.0945106	0.0489568	-0.134259
Prelp	0.216814	0.0699264	0.608275	0.613116	-0.506343	-0.848676	0.195299	0.537633
Procr	0.90772	0.323829	0.881939	0.734847	0.0834299	-0.634762	-0.114742	0.60345
Ptpra	0.650759	0.378232	0.949055	0.442194	-0.0880669	0.316004	0.026974	-0.377097
Ptprf	0.886821	0.161549	0.972643	0.350167	-0.0383991	-0.486723	-0.0124465	0.435877
Ptprs	0.917246	0.419246	0.821647	0.801759	0.0539952	-0.444851	-0.188778	0.310069
Rbp4	0.31517	0.431221	0.9976	0.949489	0.53403	0.639138	-0.00525178	-0.11036
Rpsa	0.730893	0.994328	0.538693	0.896405	-0.0812261	-0.00537019	0.206153	0.130297
Rtn3	0.582906	0.962895	0.720265	0.970818	-0.203517	0.0282899	0.185524	-0.046283
Sdc1	0.0043048	0.438916	0.812998	0.927953	-1.05283	-0.735101	0.129151	-0.188575
Sdc4	0.014945	0.626759	0.910782	0.545711	-0.800801	-0.346157	-0.0865112	-0.541156
Sestd1	0.141192	0.964996	0.837785	0.973279	0.36839	0.0637372	-0.26605	0.038603
Sfrp1	0.0900912	0.805379	0.536352	0.291351	0.49504	0.168223	0.324613	0.651431
Sort1	0.223576	0.878252	0.94879	0.81498	-0.288751	-0.109357	-0.0462508	-0.225645
Spint1	0.693001	0.541121	0.962783	0.937715	-0.131852	-0.244845	-0.0303805	0.0826126
St14	0.706504	0.996213	0.870245	0.978447	0.15026	-0.00363184	-0.105678	0.0482134
Tgfbr2	0.831653	0.718521	0.621695	0.998001	0.0571334	0.251068	0.181532	-0.0124025
Tgfbr3	0.744231	0.999592	0.96359	0.96232	0.125449	-0.00085593	-0.0334892	0.0928159
Thbd	0.0940704	0.598589	0.592991	0.999629	-0.514868	-0.233896	0.27992	-0.00105177
Thbs1	0.360394	0.455067	0.498223	0.754032	-0.238663	0.409668	0.321438	-0.326893
Thbs2	0.602596	0.884193	0.9122	0.86634	0.369101	-0.127183	-0.155045	0.34124
Thy1	0.356313	0.140829	0.974254	0.407407	0.274204	0.867267	-0.0184839	-0.611547
Tjp1	0.653337	0.973742	0.762006	0.795985	-0.0901418	0.023003	-0.097616	-0.210761
Vangl1	0.654322	0.615395	0.818771	0.813162	-0.187714	0.259168	0.148902	-0.297979
