# Supplementary material for: Deep proteome profiling reveals signatures of age and sex differences in paw skin and sciatic nerve of naïve mice
Source: eLife. 2022 Nov 30;11:e81431. doi: 10.7554/eLife.81431 (PMC9711526; doi:10.7554/eLife.81431)
Supplement: Figure 4—source data 1. [file elife-81431-fig4-data1.xlsx]

## Sheet: Sheet1
Comparing syn-go dataset with age-dependent DEP lists in SCN (https://www.syngoportal.org/index.html#downloads)							q value ≤ 0.05
	q value		Log2FC				Log2FC ≥ 0.585
Gene Name	SCN_Fe4w/Fe14w	SCN_Ma4w/Ma14w	SCN_Fe4w/Fe14w	SCN_Ma4w/Ma14w			Log2FC ≤ -0.585
Ablim3	0.00186851	0.109515	-1.01225	-0.368058
Actg1	0.804272	0.0340974	-0.0924764	-0.590343
Actn1	0.00302234	0.000885138	-1.41788	-1.24685
Actn2	0.948726	0.00531764	0.133717	-3.26875
Adam23	0.03044	0.00136927	-0.5775	-0.688125
Arf1	0.00785572	0.00928951	-1.07295	-0.947912
Arhgap44	0.00235423	0.00408335	-0.692522	-0.686466
Atp6v1f	0.111496	0.00463496	-0.324835	-0.649344
Atp6v1g1	0.00673516	0.409385	-0.613043	-0.13364
Atp6v1g2	0.0134254	0.0638865	-1.22479	-0.526841
Bcas1	0.00291788	0.000739311	-0.775089	-0.57471
Bin1	0.185097	0.0176208	-0.311314	-0.618766
Bloc1s1	0.0350743	0.0854729	-0.771094	-0.413298
Cacna2d1	0.11905	0.00488364	-0.607517	-0.972416
Cacnb1	0.646199	0.0136744	-0.687531	-1.85223
Cadm1	0.0510918	0.00920191	-0.464683	-0.592758
Cadm3	0.00205094	0.00352001	-0.999984	-0.776591
Calb1	0.00049971	3.97323e-05	-1.30693	-1.20722
Calb2	0.000608479	0.00010948	-1.05063	-0.946898
Calca	0.00353867	0.832984	0.702135	-0.0422888
Camk2a	0.46606	0.0373769	-0.632001	-1.33346
Cap2	0.351764	0.00118514	-0.314895	-1.02341
Cdh13	0.0729716	0.000621821	-0.553947	-1.21413
Cdk5	0.00412248	0.000282766	-0.534078	-0.590845
Clptm1	0.00163928	0.00524131	0.614756	0.467453
Clu	0.0116684	0.00031089	-0.65943	-0.786249
Cnksr2	0.012627	0.0238141	-0.600444	-0.448833
Cntn2	0.00826065	0.000377731	-0.54824	-0.648344
Cntnap2	0.00777697	0.000160076	-0.570711	-0.695597
Cpne6	0.00378217	0.000142712	-0.604566	-0.68604
Dnm3	0.00539156	0.000260941	-0.528371	-0.663087
Dpysl3	0.0054137	0.00041657	-0.54735	-0.622362
Drp2	0.00448257	0.000103418	-0.658117	-0.755948
Dynll2	0.000260841	0.00255145	-1.60156	-1.69794
Efnb3	0.0125381	3.97323e-05	-0.818884	-1.21575
Eif2s2	0.000941038	0.000394095	0.707155	0.574142
Erbb2	0.0253001	0.00069512	0.608313	0.68547
Fbxo2	0.00740839	0.011159	-0.85547	-0.911014
Fga	0.924096	0.0231686	-0.0251115	0.809806
Fgb	0.779432	0.0275276	-0.065678	0.894436
Fgg	0.813263	0.0100814	0.056006	0.958484
Gapdh	0.152822	0.0420131	-0.506688	-0.632387
Gpc6	0.000703671	0.00198543	-0.842513	-0.668138
Gpm6a	0.0021714	3.97323e-05	-1.23822	-1.30952
Hnrnpa0	0.404208	0.00771327	0.300061	0.857782
Hnrnpa1	0.0200777	0.000494058	0.541567	0.759956
Hnrnpa3	0.0129837	0.0033814	0.464573	0.814129
Hnrnpdl	0.00630727	0.000345522	0.616338	0.623559
Itgb3	0.00762007	0.00233861	0.585869	1.11394
Itgb4	0.00551071	0.000393728	-0.502917	-0.617968
Itpr3	0.00264451	0.000158002	0.653561	0.797409
L1cam	0.00479465	0.00195329	-0.683663	-0.4741
Lama5	0.000430916	3.97323e-05	-1.3066	-1.296
Lamb2	0.00118898	2.31616e-05	-0.938786	-1.06648
Map1lc3a	0.046684	0.0206637	-0.694043	-0.386594
Map2	0.000609482	5.92183e-05	-1.29178	-1.13521
Mapk10	0.0172091	0.019555	-0.735088	-0.670156
Marcksl1	0.00473232	0.00554227	1.0496	0.958492
Mecp2	0.00145528	0.000679637	-0.687949	-0.541152
Myh10	0.000486509	0.000345448	-0.939997	-0.620197
Napb	0.00158602	0.000355296	-0.606095	-0.710131
Necap1	0.00392686	0.00110491	-0.650746	-0.459872
Nefh	0.000295629	4.06681e-05	-1.02872	-1.08014
Nefl	0.0011453	5.23023e-05	-0.79212	-0.821708
Nefm	0.00088855	0.000419089	-0.790917	-0.797906
Nrn1	0.615427	0.00261025	0.172872	-0.772255
Nsf	0.00230208	0.000184212	-0.553374	-0.642543
Ntn1	0.0055834	0.162559	-0.679822	-0.37806
Ntng1	0.00821407	0.00410084	-0.911045	-0.783827
Ntrk2	0.118129	0.0191627	-0.346914	-0.669034
P2rx7	0.00529329	0.000934728	-0.532168	-0.623754
Pacsin1	0.00110038	0.000172519	-0.714689	-0.810405
Pak1	0.00285032	0.00394584	-0.60021	-0.668817
Pak3	0.0560983	0.00184517	-0.385084	-0.695838
Pfn2	0.0005099	0.00010948	-0.787104	-0.76244
Pin1	0.00615097	0.00636857	-0.626162	-0.522117
Pls3	0.000976733	0.000501509	-0.737437	-0.644309
Ppfia3	0.0210525	0.000507206	-0.454804	-0.591745
Ppfibp2	0.0688975	0.0337795	-0.477468	-0.653259
Prkca	0.000430916	7.13193e-05	-1.10071	-1.02891
Prkcb	0.00803717	0.000248594	-0.52563	-0.685415
Ptk2b	0.0366964	0.00031089	-0.687619	-0.762246
Pum2	0.203839	0.00839176	0.237814	0.666344
Rabac1	0.739109	0.0336754	-0.0706822	0.652531
Rac3	0.0273502	0.106387	-0.649034	-0.225251
Rala	0.00166561	0.000321061	-0.790098	-0.707539
Rpl10	0.0388014	0.00887776	0.497059	1.1106
Rpl10a	0.01104	0.000234971	0.543199	0.641375
Rpl11	0.00107385	0.00047102	0.686467	0.607199
Rpl12	0.00199992	0.00109183	0.66976	0.64921
Rpl13a	0.002723	0.000172519	0.571253	0.780749
Rpl14	0.0380352	0.00171478	0.510279	0.617907
Rpl15	0.0102169	0.00184322	0.463781	0.595432
Rpl17	0.0210056	0.000417659	0.454833	0.723667
Rpl18a	0.00855318	0.000855724	0.592388	0.696196
Rpl22	0.0374352	0.0122241	0.484881	0.68227
Rpl26	0.0367187	0.000377172	0.412415	0.590365
Rpl27	0.00529222	0.000458658	0.551062	0.631146
Rpl30	0.00143311	0.00101566	0.548493	0.630487
Rpl31	0.00412248	0.00138704	0.586753	0.556002
Rpl35	0.0359314	0.00032413	0.516075	0.82925
Rpl35a	0.011658	0.00117725	0.45515	0.632512
Rpl37a	0.00819195	0.00136927	0.763241	0.810051
Rpl38	0.0548654	3.97323e-05	0.551887	1.28486
Rpl6	0.00730514	0.00033168	0.57259	0.601496
Rpl7a	0.00187975	0.000140302	0.543592	0.719179
Rpl9	0.00235423	0.00237511	0.644224	0.554521
Rps10	0.00756919	0.000261145	0.619867	0.715543
Rps11	0.00855318	0.000194332	0.502591	0.618089
Rps16	0.00187975	0.000226502	0.591128	0.719205
Rps17	0.0199181	0.000168834	0.654925	0.817138
Rps18	0.00888727	0.000408584	0.502539	0.656279
Rps19	0.0106388	0.00031089	0.577204	0.634704
Rps23	0.00318412	0.00126343	0.802447	0.778518
Rps24	0.00187975	0.000575863	0.546792	0.62615
Rps25	0.00133181	0.000258382	0.693542	0.682074
Rps26	0.00145528	0.00387246	0.606258	0.5753
Rps27	0.0204985	0.000449582	0.619665	0.884172
Rps4x	0.00145528	0.000640427	0.682313	0.548489
Rpsa	0.00187975	0.000245704	0.553741	0.674424
Scamp5	0.192929	0.0021483	0.281869	0.654297
Scg2	0.0310342	0.0826153	0.942031	0.592169
Sdcbp	0.0153319	0.0290687	-0.623686	-0.46783
Sh3gl2	0.00101485	9.83028e-05	-0.890446	-0.943434
Skp1	0.00630727	0.107201	-0.631219	-0.313651
Slc3a2	0.00199992	0.000393728	-0.57707	-0.611619
Snca	0.0174706	0.0330737	-0.516345	0.652679
Sncb	0.000430916	0.00143114	-1.04856	-0.791227
Snx4	0.00380705	7.7397e-05	0.589425	0.772679
Sparc	0.00267468	0.000261145	0.795636	0.915749
Sptb	0.00625134	0.893481	-0.811742	-0.0724914
Stxbp5l	0.0100114	0.00164339	-0.622064	-0.831979
Syn2	0.00547912	0.000690511	-0.597011	-0.539439
Syngr1	0.0418289	0.00432038	0.352694	0.643865
Syngr2	0.00458191	0.0502945	0.676455	0.497076
Synj1	0.00227117	0.00010948	-0.65584	-0.723043
Synpo	0.152826	0.00292574	-0.470219	-1.19584
Sypl1	0.114129	0.0118323	-0.402365	-0.625843
Tenm3	0.126439	0.00723384	0.552016	0.992907
Tnc	0.00118114	0.457121	-0.965744	-0.333713
Tubb2b	0.0366419	0.11187	-0.685289	-0.63048
Vamp4	0.026058	0.00807222	0.648904	0.908716
Vcan	0.00773924	0.000134449	-0.555372	-1.30974
Ybx1	0.00205677	0.000551348	0.767787	1.05583
