# Supplementary material for: Deep proteome profiling reveals signatures of age and sex differences in paw skin and sciatic nerve of naïve mice
Source: eLife. 2022 Nov 30;11:e81431. doi: 10.7554/eLife.81431 (PMC9711526; doi:10.7554/eLife.81431)
Supplement: Figure 4—source data 2. [file elife-81431-fig4-data2.xlsx]

## Sheet: Sheet1
Comparison between ligands of neuronal receptors found in immune cells with SCN proteome ( doi: 10.1126/scisignal.abe1648, supplementary table 2, cluster M-R)										Proteins with age-dependent significance in both sexes
	q value				Log2FC					q value ≤ 0.05
Gene Name	SCN_Fe4w/Fe14w	SCN_Ma4w/Ma14w	SCN_Ma4w/Fe4w	SCN_Ma14w/Fe14w	SCN_Fe4w/Fe14w	SCN_Ma4w/Ma14w	SCN_Ma4w/Fe4w	SCN_Ma14w/Fe14w
Agrn	0.00430929	0.00293821	0.963334	0.974828	-0.520879	-0.573247	-0.0362978	0.0160704
Agt	0.93829	0.968975	0.815151	0.78787	-0.013608	-0.00988535	-0.172104	-0.175827
Angptl2	0.0321626	0.0114631	0.832393	0.961915	0.600295	0.467333	-0.0852431	0.0477187
Apod	0.0109775	0.00051086	0.984037	0.804052	-0.685593	-0.812732	0.0175432	0.144682
Bmp1	0.0335434	0.00184213	0.669821	0.805529	0.352022	0.459751	0.223945	0.116216
C3	0.533646	0.0012635	0.889653	0.0180123	-0.130473	0.690258	-0.0852745	-0.906006
Cadm4	0.00132386	0.0144217	0.79553	0.709823	-0.615671	-0.372817	0.138063	-0.104791
Cdh1	0.0232675	0.0123907	0.826005	0.902515	-0.319147	-0.288907	0.0811492	0.050909
Cfh	0.294715	0.248318	0.726164	0.888283	-0.178283	0.142441	0.248647	-0.0720762
Cgn	0.0228048	0.773183	0.791392	0.620092	-0.605899	-0.0587737	0.180737	-0.366388
Clec11a	0.184398	0.210631	0.79203	0.799736	0.294614	0.290164	0.215529	0.219979
Col18a1	0.00158767	0.000242114	0.760379	0.620092	-0.821599	-0.875121	0.148479	0.202001
Col1a1	0.0570631	0.0299945	0.782063	0.592545	0.806491	0.596598	0.317256	0.527148
Col1a2	0.0625078	0.00933283	0.717496	0.709237	0.856264	0.851152	0.4717	0.476811
Col3a1	0.000444395	1.15289e-05	0.685111	0.926469	1.71215	2.01111	0.230408	-0.0685586
Col4a1	0.7553	0.102868	0.992955	0.768994	0.0757046	0.322504	0.00908501	-0.237715
Col6a1	0.00235423	0.00057897	0.821632	0.927475	-0.636869	-0.585677	0.0899949	0.0388024
Col6a2	0.002575	0.00125999	0.760379	0.983767	-0.678494	-0.513029	0.157166	-0.0082989
Cp	0.00456847	0.059011	0.954024	0.132504	-0.548082	-0.221367	0.0410067	-0.285708
Dagla	0.0786151	0.00588467	0.62637	0.73937	0.283092	0.406126	0.282608	0.159575
F10	0.0628032	0.0521848	0.734146	0.298575	-0.469679	0.482139	0.286166	-0.665653
F13a1	0.473244	0.0244319	0.985685	0.442177	-0.115778	-0.491262	-0.0173311	0.358153
F2	0.101055	0.492726	0.988412	0.333114	-0.320825	0.114069	-0.0129694	-0.447863
Farp2	0.0525754	0.0887461	0.98313	0.978987	0.250469	0.248909	0.0141373	0.0156971
Fbln1	0.0513685	0.000690286	0.849279	0.880564	-0.402475	-0.580427	-0.101887	0.0760657
Fbln2	0.594209	0.00188713	0.995665	0.21105	-0.0881594	-0.528538	-0.00468232	0.435696
Fgf1	0.0102482	0.000254231	0.853731	0.513829	-0.756874	-0.639044	-0.115168	-0.232998
Fgf13	0.795829	0.986588	0.98313	0.936871	0.076838	-0.0046853	0.0204939	0.102017
Gpc3	0.409223	0.0839166	0.671383	0.789918	-0.129541	0.281844	0.228072	-0.183313
Icam2	0.240596	0.190056	0.98313	0.953549	-0.396722	-0.420268	0.0454406	0.0689868
Il16	0.343786	0.088325	0.979655	0.929761	0.146475	0.211897	0.021055	-0.044367
Lama4	0.0290387	0.00474002	0.864076	0.822265	-0.269816	-0.293959	0.0509285	0.0750717
Lama5	0.000430916	3.97323e-05	0.717496	0.513248	-1.3066	-1.296	0.221165	0.210563
Lamb1	0.61762	0.807826	0.954444	0.899923	-0.0556921	0.0246031	0.0270774	-0.0532178
Lamb2	0.00118898	2.31616e-05	0.952362	0.822265	-0.938786	-1.06648	-0.0324563	0.0952404
Ltbp1	0.0257015	0.340457	0.62637	0.693468	-0.501077	0.292771	0.319728	-0.47412
Mfap2	0.273584	0.00174528	0.669821	0.984538	-0.327102	-0.90766	-0.59554	-0.0149824
Mfap5	0.0454417	7.14782e-05	0.667241	0.915679	-0.88317	-1.65925	-0.671798	0.104283
Mmp2	0.484702	0.467356	0.878706	0.669859	-0.10958	0.144267	-0.065733	-0.319579
Ncam1	0.64173	0.23928	0.752812	0.964311	-0.0526329	0.127839	0.162831	-0.0176413
Nid1	0.025325	0.00258594	0.983132	0.964083	-0.32583	-0.35585	-0.0103584	0.0196612
Ogn	0.00225122	0.000352791	0.934872	0.669859	-0.66748	-0.777935	0.0449237	0.155379
Pf4	0.11129	0.193842	0.759749	0.705037	-0.368086	0.636914	0.533884	-0.471116
Plat	0.676868	0.610376	0.717496	0.991363	0.126948	-0.109097	-0.221615	0.0144293
Rarres2	0.219986	0.0176249	0.685111	0.981887	0.320389	0.646876	0.351959	0.0254721
Rbp4	0.511153	0.193547	0.791392	0.767833	-0.187081	0.46267	0.244267	-0.405483
Sema3b	0.136179	0.00641751	0.734146	0.921451	0.150451	0.324905	0.137306	-0.0371473
Sema3c	0.760172	0.50931	0.842669	0.969962	0.145469	0.433339	0.381317	0.0934478
Sema6d	0.250732	0.00184969	0.692153	0.91201	0.206849	0.44588	0.162125	-0.0769062
Sestd1	0.446264	0.295153	0.770217	0.738922	0.115795	0.120378	-0.146747	-0.15133
Sfrp1	0.472869	0.084892	0.887872	0.202845	-0.110889	-0.495077	0.141547	0.525735
Spint1	0.0624283	0.0784068	0.984037	0.904828	0.455466	0.631428	-0.0162909	-0.192253
Thbs1	0.00190003	0.876311	0.72393	0.550403	-1.0902	0.0755662	0.707331	-0.458438
Thbs2	0.707858	0.0135372	0.809178	0.738922	0.0859273	0.45432	0.157061	-0.211332
Thy1	0.0221904	7.7397e-05	0.698955	0.953549	-0.569909	-0.81806	-0.278701	-0.0305502
Vangl1	0.0298979	0.00764269	0.802332	0.756383	0.619413	0.512794	0.136618	0.243236
