# Supplementary material for: Deep proteome profiling reveals signatures of age and sex differences in paw skin and sciatic nerve of naïve mice
Source: eLife. 2022 Nov 30;11:e81431. doi: 10.7554/eLife.81431 (PMC9711526; doi:10.7554/eLife.81431)
Supplement: Figure 4—source data 3. [file elife-81431-fig4-data3.xlsx]

## Sheet: NeuronLigandsofGlialReceptor
Neuronal ligands of glial cell receptors found in SCN proteome( doi: 10.1126/scisignal.abe1648, supplementary table 3, data sheet 2)										Proteins with age-dependent significance in both sexes
	q value				Log2FC					q value ≤ 0.05
Gene Name	SCN_Fe4w/Fe14w	SCN_Ma4w/Ma14w	SCN_Ma4w/Fe4w	SCN_Ma14w/Fe14w	SCN_Fe4w/Fe14w	SCN_Ma4w/Ma14w	SCN_Ma4w/Fe4w	SCN_Ma14w/Fe14w
Adam10	0.103537	0.0772532	0.976572	0.978009	-0.196405	-0.168831	0.0138209	-0.0137525
Adam15	0.562346	0.00713129	0.72393	0.995823	-0.168703	-0.462775	-0.290279	0.00379263
Adam17	0.373735	0.254678	0.970236	0.929761	-0.121811	-0.128142	0.0298636	0.0361951
Adam23	0.03044	0.00136927	0.854722	0.978987	-0.5775	-0.688125	-0.0876401	0.0229843
Adam9	0.14027	0.260025	0.67432	0.819602	0.323068	0.143174	-0.322653	-0.142759
Apoe	0.639724	0.0381175	0.67432	0.867739	-0.100374	0.527631	0.506072	-0.121933
App	0.459928	0.972898	0.788083	0.984538	-0.123075	0.0068028	0.145115	0.0152378
Cadm1	0.0510918	0.00920191	0.797314	0.989074	-0.464683	-0.592758	-0.142011	-0.0139353
Cadm3	0.00205094	0.00352001	0.862619	0.888283	-0.999984	-0.776591	0.124768	-0.0986244
Cadm4	0.00132386	0.0144217	0.79553	0.709823	-0.615671	-0.372817	0.138063	-0.104791
Calca	0.00353867	0.832984	0.979288	0.066161	0.702135	-0.0422888	0.023741	0.768164
Calr	0.113953	0.0101826	0.777739	0.876484	0.239074	0.511547	0.1798	-0.0926727
Cdh1	0.0232675	0.0123907	0.826005	0.902515	-0.319147	-0.288907	0.0811492	0.050909
Cdh11	0.601715	0.207323	0.792103	0.824189	0.0577338	-0.126051	-0.105227	0.0785585
Cgn	0.0228048	0.773183	0.791392	0.620092	-0.605899	-0.0587737	0.180737	-0.366388
Chl1	0.00044135	3.97323e-05	0.72393	0.954447	-1.15999	-1.02511	0.160564	0.0256808
Clstn1	0.648953	0.492501	0.759749	0.989729	-0.0563787	0.0679616	0.130363	0.00602239
Cntn2	0.00826065	0.000377731	0.98313	0.868602	-0.54824	-0.648344	-0.0150703	0.0850344
Col18a1	0.00158767	0.000242114	0.760379	0.620092	-0.821599	-0.875121	0.148479	0.202001
Col1a2	0.0625078	0.00933283	0.717496	0.709237	0.856264	0.851152	0.4717	0.476811
Cpe	0.70103	0.731741	0.969919	0.944198	-0.0661861	-0.0423927	-0.0228707	-0.0466641
Dhh	0.0187542	0.163585	0.817314	0.809903	-0.568916	-0.2489	0.146999	-0.173017
Edil3	0.25452	0.562357	0.975539	0.78787	0.20964	0.0833176	0.027257	0.153579
Efemp2	0.21567	0.412049	0.791392	0.946978	-0.173332	-0.0850513	0.1196	0.0313192
Efnb1	0.655647	0.352638	0.995982	0.930534	0.0627127	0.102442	-0.0028347	-0.0425637
Fbln2	0.594209	0.00188713	0.995665	0.21105	-0.0881594	-0.528538	-0.00468232	0.435696
Fgf1	0.0102482	0.000254231	0.853731	0.513829	-0.756874	-0.639044	-0.115168	-0.232998
Fgf13	0.795829	0.986588	0.98313	0.936871	0.076838	-0.0046853	0.0204939	0.102017
Fgg	0.813263	0.0100814	0.62637	0.829598	0.056006	0.958484	0.688039	-0.214439
Gas6	0.000486509	0.000708449	0.79203	0.947738	-1.34592	-1.10808	0.19313	-0.0447119
Grn	0.629261	0.00352169	0.753416	0.791658	0.267368	-0.562225	-0.481707	0.347886
Gstp1	0.010667	0.0074421	0.995982	0.899131	-0.410149	-0.345188	0.00201839	-0.0629423
Hras	0.0766854	0.00350495	0.779726	0.969962	-0.369727	-0.507776	-0.163445	-0.0253956
Hsp90b1	0.0332705	0.00161478	0.750914	0.869077	0.262956	0.476177	0.157831	-0.0553899
Jam2	0.162958	0.00991169	0.759749	0.885267	-0.327906	-0.758431	-0.29921	0.131314
Jam3	0.00202074	0.00194756	0.982006	0.97608	-0.624405	-0.591304	0.0171283	-0.015973
L1cam	0.00479465	0.00195329	0.786961	0.876223	-0.683663	-0.4741	0.11671	-0.0928528
Lama4	0.0290387	0.00474002	0.864076	0.822265	-0.269816	-0.293959	0.0509285	0.0750717
Lamb1	0.61762	0.807826	0.954444	0.899923	-0.0556921	0.0246031	0.0270774	-0.0532178
Lamc1	0.0249599	0.00171478	0.970014	0.96888	-0.350659	-0.389674	-0.0218208	0.0171936
Lgals3bp	0.0350686	0.497696	0.954444	0.391441	-0.677088	-0.150361	0.0799138	-0.446814
Lin7c	0.384472	0.0566643	0.851828	0.942206	-0.110569	-0.215738	-0.0715065	0.0336623
Lrpap1	0.0835491	0.0817759	0.753606	0.54165	0.244914	0.188915	0.151516	0.207515
Lsamp	0.0426759	0.0111756	0.981585	0.936204	0.416556	0.348674	-0.0176945	0.050188
Mpz	0.0021714	0.00210513	0.912784	0.96054	-0.976646	-0.856743	0.0869251	-0.0329776
Ncam1	0.64173	0.23928	0.752812	0.964311	-0.0526329	0.127839	0.162831	-0.0176413
Negr1	0.870576	0.31761	0.882682	0.874392	-0.0308157	0.162982	0.0682241	-0.125573
Nfasc	0.8189	0.414304	0.824647	0.946143	-0.0368349	0.0789915	0.07954	-0.0362863
Ngfr	0.998156	0.0229381	0.555489	0.946978	0.00105723	0.573272	0.476051	-0.0961631
Nid1	0.025325	0.00258594	0.983132	0.964083	-0.32583	-0.35585	-0.0103584	0.0196612
Ntm	0.174045	0.000663167	0.799883	0.733612	0.358845	0.771647	0.180523	-0.232278
Ntng1	0.00821407	0.00410084	0.799883	0.904298	-0.911045	-0.783827	0.228257	0.10104
Pdap1	0.422726	0.329663	0.991578	0.454966	-0.0901632	0.154792	-0.0104406	-0.255396
Prss23	0.149901	0.371465	0.954024	0.98665	-0.36252	-0.263778	0.078536	-0.0202063
Psap	0.0448679	0.194792	0.669821	0.933596	0.336141	0.128846	-0.247914	-0.0406188
Psen1	0.594683	0.166686	0.810317	0.760675	-0.294729	0.550154	0.485352	-0.359531
Ptdss1	0.0890974	0.10312	0.966174	0.957328	0.396424	0.513328	0.0444303	-0.0724741
Qdpr	0.00720064	0.00241368	0.839272	0.983767	-0.391365	-0.443641	-0.0619336	-0.00965722
Rgma	0.898483	0.332511	0.888047	0.898572	-0.0446268	0.224452	0.111569	-0.15751
Sema3b	0.136179	0.00641751	0.734146	0.921451	0.150451	0.324905	0.137306	-0.0371473
Sema3c	0.760172	0.50931	0.842669	0.969962	0.145469	0.433339	0.381317	0.0934478
Sema4d	0.678319	0.951027	0.73517	0.620092	-0.0999707	-0.0125883	-0.259028	-0.34641
Sema6d	0.250732	0.00184969	0.692153	0.91201	0.206849	0.44588	0.162125	-0.0769062
Sema7a	0.0157188	0.00071285	0.753606	0.945337	-0.590619	-0.538137	0.102692	0.0502096
Serpine2	0.997007	0.0176577	0.645443	0.959593	-0.000772907	0.32606	0.300747	-0.0260856
Serping1	0.184844	0.585854	0.821632	0.820759	-0.144099	0.0905806	0.106419	-0.128261
Spp1	0.000444395	5.50008e-05	0.940363	0.872351	-1.61614	-1.57112	-0.0567874	-0.101808
Thy1	0.0221904	7.7397e-05	0.698955	0.953549	-0.569909	-0.81806	-0.278701	-0.0305502
Timp2	0.216305	0.931081	0.753606	0.994025	-0.322266	-0.0176754	0.299626	-0.00496508
Timp3	0.109679	0.152188	0.920925	0.78787	-0.414837	-0.271931	-0.0774538	-0.22036

## Sheet: Ligand-Receptor Pairs
Ligand		Ligand_q value		Ligand_Log2FC		Receptor		Receptor_q value		Receptor_Log2FC
Neuronal Ligand	Ligand category	SCN_Fe4w/Fe14w	SCN_Ma4w/Ma14w	SCN_Fe4w/Fe14w	SCN_Ma4w/Ma14w	Glial Receptor	Receptor category	SCN_Fe4w/Fe14w	SCN_Ma4w/Ma14w	SCN_Fe4w/Fe14w	SCN_Ma4w/Ma14w
ADAM23	ECM	0.03044	0.00136927	-0.5775	-0.688125	ITGB3	CAM	0.00762007	0.00233861	0.585869	1.11394
CADM4	CAM	0.00132386	0.0144217	-0.615671	-0.372817	PTPN13	PTP	0.393274	0.847275	0.0940925	0.0210119
CALR	IBP	0.113953	0.0101826	0.239074	0.511547	ITGAV	CAM	0.0134254	0.00112324	0.352176	0.485889
CALR	IBP	0.113953	0.0101826	0.239074	0.511547	LRP1	Lipoprotein Receptor	0.352823	0.546977	0.0987771	0.0550455
CNTN2	CAM	0.00826065	0.000377731	-0.54824	-0.648344	CNTN1	CAM	0.0379219	0.00311701	-0.342744	-0.372331
COL1A2	ECM	0.0625078	0.00933283	0.856264	0.851152	ITGAV	CAM	0.0134254	0.00112324	0.352176	0.485889
COL1A2	ECM	0.0625078	0.00933283	0.856264	0.851152	ITGB3	CAM	0.00762007	0.00233861	0.585869	1.11394
HSP90B1	IBP	0.0332705	0.00161478	0.262956	0.476177	ERBB2	RK	0.0253001	0.00069512	0.608313	0.68547
HSP90B1	IBP	0.0332705	0.00161478	0.262956	0.476177	LRP1	Lipoprotein Receptor	0.352823	0.546977	0.0987771	0.0550455
JAM3	CAM	0.00202074	0.00194756	-0.624405	-0.591304	F11R	CAM	0.00124441	0.000148485	-0.740927	-0.764119
JAM3	CAM	0.00202074	0.00194756	-0.624405	-0.591304	TJP1	CAM	0.010018	0.00488169	-0.366001	-0.347729
L1CAM	CAM	0.00479465	0.00195329	-0.683663	-0.4741	CNTN1	CAM	0.0379219	0.00311701	-0.342744	-0.372331
L1CAM	CAM	0.00479465	0.00195329	-0.683663	-0.4741	ERBB2	RK	0.0253001	0.00069512	0.608313	0.68547
L1CAM	CAM	0.00479465	0.00195329	-0.683663	-0.4741	ITGAV	CAM	0.0134254	0.00112324	0.352176	0.485889
LAMC1	ECM	0.0249599	0.00171478	-0.350659	-0.389674	ITGA6	CAM	0.0285233	0.00184322	-0.282773	-0.384031
LAMC1	ECM	0.0249599	0.00171478	-0.350659	-0.389674	ITGA7	CAM	0.0254502	0.000930113	-0.31205	-0.439609
LAMC1	ECM	0.0249599	0.00171478	-0.350659	-0.389674	ITGAV	CAM	0.0134254	0.00112324	0.352176	0.485889
LAMC1	ECM	0.0249599	0.00171478	-0.350659	-0.389674	ITGB4	CAM	0.00551071	0.000393728	-0.502917	-0.617968
LRPAP1	LBP	0.0835491	0.0817759	0.244914	0.188915	LDLR	Lipoprotein Receptor	0.00318412	0.000221381	0.674709	0.745865
LRPAP1	LBP	0.0835491	0.0817759	0.244914	0.188915	LRP1	Lipoprotein Receptor	0.352823	0.546977	0.0987771	0.0550455
LSAMP	CAM	0.0426759	0.0111756	0.416556	0.348674	NTNG1	CAM	0.00821407	0.00410084	-0.911045	-0.783827
NID1	ECM	0.025325	0.00258594	-0.32583	-0.35585	ITGAV	CAM	0.0134254	0.00112324	0.352176	0.485889
NID1	ECM	0.025325	0.00258594	-0.32583	-0.35585	ITGB3	CAM	0.00762007	0.00233861	0.585869	1.11394
PSAP	Secreted Protein	0.0448679	0.194792	0.336141	0.128846	LRP1	Lipoprotein Receptor	0.352823	0.546977	0.0987771	0.0550455
QDPR	Enzyme	0.00720064	0.00241368	-0.391365	-0.443641	DYSF	Receptor Binding	0.0113183	0.000465542	-0.443084	-0.716242
SPP1	Secreted Protein	0.000444395	5.50008e-05	-1.61614	-1.57112	ITGAV	CAM	0.0134254	0.00112324	0.352176	0.485889
THY1	CAM	0.0221904	7.7397e-05	-0.569909	-0.81806	ITGAV	CAM	0.0134254	0.00112324	0.352176	0.485889
THY1	CAM	0.0221904	7.7397e-05	-0.569909	-0.81806	ITGB3	CAM	0.00762007	0.00233861	0.585869	1.11394
