# Supplementary material for: Deep proteome profiling reveals signatures of age and sex differences in paw skin and sciatic nerve of naïve mice
Source: eLife. 2022 Nov 30;11:e81431. doi: 10.7554/eLife.81431 (PMC9711526; doi:10.7554/eLife.81431)
Supplement: Figure 4—source data 4. [file elife-81431-fig4-data4.xlsx]

## Sheet: GlialLigandsofNeuronReceptors
Glial cell ligands of neuronal receptors found in SCN proteome ( doi: 10.1126/scisignal.abe1648, supplementary table 3, data sheet 3)										Proteins with age-dependent significance in both sexes
	q value				Log2FC					q value ≤ 0.05
Gene Name	SCN_Fe4w/Fe14w	SCN_Ma4w/Ma14w	SCN_Ma4w/Fe4w	SCN_Ma14w/Fe14w	SCN_Fe4w/Fe14w	SCN_Ma4w/Ma14w	SCN_Ma4w/Fe4w	SCN_Ma14w/Fe14w
Adam17	0.373735	0.254678	0.970236	0.929761	-0.121811	-0.128142	0.0298636	0.0361951
Adam9	0.14027	0.260025	0.67432	0.819602	0.323068	0.143174	-0.322653	-0.142759
Adgrl3	0.559115	0.101815	0.886815	0.957328	-0.13826	-0.202292	-0.0978951	-0.0338638
Agrn	0.00430929	0.00293821	0.963334	0.974828	-0.520879	-0.573247	-0.0362978	0.0160704
Apoe	0.639724	0.0381175	0.67432	0.867739	-0.100374	0.527631	0.506072	-0.121933
App	0.459928	0.972898	0.788083	0.984538	-0.123075	0.0068028	0.145115	0.0152378
B2m	0.00235423	0.0225649	0.748856	0.768034	-0.748247	-0.392962	0.228093	-0.127192
Bmp1	0.0335434	0.00184213	0.669821	0.805529	0.352022	0.459751	0.223945	0.116216
Cadm1	0.0510918	0.00920191	0.797314	0.989074	-0.464683	-0.592758	-0.142011	-0.0139353
Cadm3	0.00205094	0.00352001	0.862619	0.888283	-0.999984	-0.776591	0.124768	-0.0986244
Cadm4	0.00132386	0.0144217	0.79553	0.709823	-0.615671	-0.372817	0.138063	-0.104791
Calr	0.113953	0.0101826	0.777739	0.876484	0.239074	0.511547	0.1798	-0.0926727
Cdh1	0.0232675	0.0123907	0.826005	0.902515	-0.319147	-0.288907	0.0811492	0.050909
Clstn1	0.648953	0.492501	0.759749	0.989729	-0.0563787	0.0679616	0.130363	0.00602239
Col11a1	0.0645256	0.0007442	0.95609	0.993201	0.888716	0.963928	0.0614676	-0.0137447
Col14a1	0.00135564	0.00010948	0.745004	0.929761	1.14523	1.40485	0.190854	-0.0687665
Col1a1	0.0570631	0.0299945	0.782063	0.592545	0.806491	0.596598	0.317256	0.527148
Col1a2	0.0625078	0.00933283	0.717496	0.709237	0.856264	0.851152	0.4717	0.476811
Col3a1	0.000444395	1.15289e-05	0.685111	0.926469	1.71215	2.01111	0.230408	-0.0685586
Col4a1	0.7553	0.102868	0.992955	0.768994	0.0757046	0.322504	0.00908501	-0.237715
Col5a1	0.0782509	0.00549239	0.717496	0.818151	0.361559	0.494778	0.26776	0.13454
Col5a2	0.0509959	0.000352791	0.62637	0.712677	0.34626	0.506228	0.312277	0.152309
Cpe	0.70103	0.731741	0.969919	0.944198	-0.0661861	-0.0423927	-0.0228707	-0.0466641
Dhh	0.0187542	0.163585	0.817314	0.809903	-0.568916	-0.2489	0.146999	-0.173017
Efemp2	0.21567	0.412049	0.791392	0.946978	-0.173332	-0.0850513	0.1196	0.0313192
Efnb1	0.655647	0.352638	0.995982	0.930534	0.0627127	0.102442	-0.0028347	-0.0425637
Faah	0.000847056	0.000194332	0.936353	0.956183	0.990659	0.985383	-0.0381365	-0.0328604
Fbn1	0.889218	0.00440673	0.62637	0.780767	-0.0474346	-0.934385	-0.560208	0.326741
Fgf1	0.0102482	0.000254231	0.853731	0.513829	-0.756874	-0.639044	-0.115168	-0.232998
Fkbp4	0.0152638	0.67839	0.717496	0.818151	-0.290011	-0.0474077	0.139993	-0.10261
Fyn	0.336362	0.584688	0.927105	0.907295	-0.16724	-0.0530071	0.0450879	-0.0691446
Gas6	0.000486509	0.000708449	0.79203	0.947738	-1.34592	-1.10808	0.19313	-0.0447119
Gfer	0.247542	0.00217351	0.685111	0.995311	-0.441687	-0.646452	-0.21133	-0.00656469
Grn	0.629261	0.00352169	0.753416	0.791658	0.267368	-0.562225	-0.481707	0.347886
Gstp1	0.010667	0.0074421	0.995982	0.899131	-0.410149	-0.345188	0.00201839	-0.0629423
Hepacam	0.57779	0.0333429	0.849038	0.831495	0.100561	0.321609	0.098826	-0.122222
Hmgb1	0.954769	0.173784	0.992955	0.610251	-0.0102343	0.236883	-0.00878928	-0.255907
Homer3	0.797618	0.676152	0.739979	0.73937	-0.0425243	-0.0375513	0.148752	0.143779
Hras	0.0766854	0.00350495	0.779726	0.969962	-0.369727	-0.507776	-0.163445	-0.0253956
Hsp90b1	0.0332705	0.00161478	0.750914	0.869077	0.262956	0.476177	0.157831	-0.0553899
Hspg2	0.432871	0.21625	0.875258	0.92594	-0.104359	-0.110437	-0.0523234	-0.046246
Igsf11	0.0581127	0.0354959	0.839272	0.912241	-0.502976	-0.379641	0.177061	0.0537255
Il16	0.343786	0.088325	0.979655	0.929761	0.146475	0.211897	0.021055	-0.044367
Jam2	0.162958	0.00991169	0.759749	0.885267	-0.327906	-0.758431	-0.29921	0.131314
Jam3	0.00202074	0.00194756	0.982006	0.97608	-0.624405	-0.591304	0.0171283	-0.015973
Lama2	0.0506827	0.0196704	0.970583	0.894139	-0.319275	-0.233032	0.0183264	-0.0679165
Lama4	0.0290387	0.00474002	0.864076	0.822265	-0.269816	-0.293959	0.0509285	0.0750717
Lama5	0.000430916	3.97323e-05	0.717496	0.513248	-1.3066	-1.296	0.221165	0.210563
Lamb1	0.61762	0.807826	0.954444	0.899923	-0.0556921	0.0246031	0.0270774	-0.0532178
Lamc1	0.0249599	0.00171478	0.970014	0.96888	-0.350659	-0.389674	-0.0218208	0.0171936
Lin7c	0.384472	0.0566643	0.851828	0.942206	-0.110569	-0.215738	-0.0715065	0.0336623
Lrpap1	0.0835491	0.0817759	0.753606	0.54165	0.244914	0.188915	0.151516	0.207515
Mfap5	0.0454417	7.14782e-05	0.667241	0.915679	-0.88317	-1.65925	-0.671798	0.104283
Mfge8	0.107493	0.00710836	0.932016	0.981887	-0.757989	-0.713808	0.0802568	0.0360754
Mgll	0.0011453	0.000408584	0.753606	0.587437	0.685623	0.697988	0.160874	0.148509
Mmp2	0.484702	0.467356	0.878706	0.669859	-0.10958	0.144267	-0.065733	-0.319579
Mpz	0.0021714	0.00210513	0.912784	0.96054	-0.976646	-0.856743	0.0869251	-0.0329776
Nampt	0.0412961	0.11004	0.809367	0.993867	-0.264034	-0.182006	0.0780117	-0.00401632
Ncam1	0.64173	0.23928	0.752812	0.964311	-0.0526329	0.127839	0.162831	-0.0176413
Nfasc	0.8189	0.414304	0.824647	0.946143	-0.0368349	0.0789915	0.07954	-0.0362863
Nid1	0.025325	0.00258594	0.983132	0.964083	-0.32583	-0.35585	-0.0103584	0.0196612
Ntng1	0.00821407	0.00410084	0.799883	0.904298	-0.911045	-0.783827	0.228257	0.10104
Ogn	0.00225122	0.000352791	0.934872	0.669859	-0.66748	-0.777935	0.0449237	0.155379
P4hb	0.0516865	0.0021483	0.757576	0.908544	0.248591	0.434151	0.138958	-0.0466019
Pacs2	0.0463952	0.00537042	0.910208	0.893939	0.284386	0.396127	0.0438676	-0.0678729
Pdap1	0.422726	0.329663	0.991578	0.454966	-0.0901632	0.154792	-0.0104406	-0.255396
Pkd2	0.253307	0.584688	0.984037	0.946978	-0.119595	-0.0731283	0.0105983	-0.0358685
Pkm	0.0090827	0.00277824	0.791392	0.966683	-0.649021	-0.765293	-0.152274	-0.0360022
Plat	0.676868	0.610376	0.717496	0.991363	0.126948	-0.109097	-0.221615	0.0144293
Plcb1	0.0653348	0.00328436	0.871037	0.728985	-0.217914	-0.397475	-0.0603431	0.119218
Prss23	0.149901	0.371465	0.954024	0.98665	-0.36252	-0.263778	0.078536	-0.0202063
Psap	0.0448679	0.194792	0.669821	0.933596	0.336141	0.128846	-0.247914	-0.0406188
Psen1	0.594683	0.166686	0.810317	0.760675	-0.294729	0.550154	0.485352	-0.359531
Qdpr	0.00720064	0.00241368	0.839272	0.983767	-0.391365	-0.443641	-0.0619336	-0.00965722
Rtn4	0.0820647	0.840273	0.669821	0.919834	-0.195533	0.0180843	0.172461	-0.0411564
Sema3b	0.136179	0.00641751	0.734146	0.921451	0.150451	0.324905	0.137306	-0.0371473
Sema3c	0.760172	0.50931	0.842669	0.969962	0.145469	0.433339	0.381317	0.0934478
Sema6d	0.250732	0.00184969	0.692153	0.91201	0.206849	0.44588	0.162125	-0.0769062
Serpine2	0.997007	0.0176577	0.645443	0.959593	-0.000772907	0.32606	0.300747	-0.0260856
Serping1	0.184844	0.585854	0.821632	0.820759	-0.144099	0.0905806	0.106419	-0.128261
Slit2	0.00675527	0.0621081	0.995982	0.929761	0.410925	0.353537	-0.00426193	0.0531267
Sort1	0.0411299	0.430101	0.734146	0.924	-0.310516	-0.0913415	0.168676	-0.0504985
Spp1	0.000444395	5.50008e-05	0.940363	0.872351	-1.61614	-1.57112	-0.0567874	-0.101808
Tcn2	0.038981	0.043677	0.970236	0.954888	-0.34077	-0.282083	0.0268259	-0.0318612
Timp2	0.216305	0.931081	0.753606	0.994025	-0.322266	-0.0176754	0.299626	-0.00496508

## Sheet: Ligand-Receptor pairs
Ligand		Ligand_q value		Ligand_Log2FC		Receptor		Receptor_q value		Receptor_Log2FC
Glail Ligand	Ligand category	SCN_Fe4w/Fe14w	SCN_Ma4w/Ma14w	SCN_Fe4w/Fe14w	SCN_Ma4w/Ma14w	Neuron Receptor	Receptor category	SCN_Fe4w/Fe14w	SCN_Ma4w/Ma14w	SCN_Fe4w/Fe14w	SCN_Ma4w/Ma14w
B2M	Cytokine/Chemokine	0.00235423	0.0225649	-0.748247	-0.392962	TFRC	CAM	0.00195471	0.000226502	0.69581	0.640264
BMP1	GF	0.0335434	0.00184213	0.352022	0.459751	COL1A2	CAM	0.0625078	0.00933283	0.856264	0.851152
CADM1	CAM	0.0510918	0.00920191	-0.464683	-0.592758	EPB41L3	CAM	0.00178218	0.000230325	-0.716774	-0.659058
CADM4	CAM	0.00132386	0.0144217	-0.615671	-0.372817	PTPN13	PTP	0.393274	0.847275	0.0940925	0.0210119
CALR	IBP	0.113953	0.0101826	0.239074	0.511547	ITGA3	CAM	0.0240472	0.00138704	-0.381394	-0.50017
CALR	IBP	0.113953	0.0101826	0.239074	0.511547	LRP1	Lipoprotein Receptor	0.352823	0.546977	0.0987771	0.0550455
HSP90B1	IBP	0.0332705	0.00161478	0.262956	0.476177	LRP1	Lipoprotein Receptor	0.352823	0.546977	0.0987771	0.0550455
IL16	Cytokine/Chemokine	0.343786	0.088325	0.146475	0.211897	KCNJ10	Ion Channel	0.00729945	0.0040974	0.680822	1.23563
LAMA5	ECM	0.000430916	3.97323e-05	-1.3066	-1.296	BCAM	CAM	0.000450263	2.69711e-05	-1.01066	-1.07014
LAMA5	ECM	0.000430916	3.97323e-05	-1.3066	-1.296	ITGA3	CAM	0.0240472	0.00138704	-0.381394	-0.50017
LAMA5	ECM	0.000430916	3.97323e-05	-1.3066	-1.296	ITGA6	CAM	0.0285233	0.00184322	-0.282773	-0.384031
LAMC1	ECM	0.0249599	0.00171478	-0.350659	-0.389674	ITGA3	CAM	0.0240472	0.00138704	-0.381394	-0.50017
LAMC1	ECM	0.0249599	0.00171478	-0.350659	-0.389674	ITGA6	CAM	0.0285233	0.00184322	-0.282773	-0.384031
LAMC1	ECM	0.0249599	0.00171478	-0.350659	-0.389674	ITGA7	CAM	0.0254502	0.000930113	-0.31205	-0.439609
LRPAP1	receptor binding	0.0835491	0.0817759	0.244914	0.188915	LDLR	Lipoprotein Receptor	0.00318412	0.000221381	0.674709	0.745865
LRPAP1	receptor binding	0.0835491	0.0817759	0.244914	0.188915	LRP1	Lipoprotein Receptor	0.352823	0.546977	0.0987771	0.0550455
LSAMP	CAM	0.0426759	0.0111756	0.416556	0.348674	NTNG1	CAM	0.00821407	0.00410084	-0.911045	-0.783827
LSAMP	CAM	0.0426759	0.0111756	0.416556	0.348674	THY1	Ig	0.0221904	7.7397e-05	-0.569909	-0.81806
NCAM2	CAM	0.00321046	0.0024164	0.702219	0.588336	L1CAM	CAM	0.00479465	0.00195329	-0.683663	-0.4741
NCAM2	CAM	0.00321046	0.0024164	0.702219	0.588336	PRNP	Miscellaneous	0.0313681	0.00163494	-0.543056	-0.64884
NID1	ECM	0.025325	0.00258594	-0.32583	-0.35585	ITGA3	CAM	0.0240472	0.00138704	-0.381394	-0.50017
PSAP	Secreted Protein	0.0448679	0.194792	0.336141	0.128846	LRP1	Lipoprotein Receptor	0.352823	0.546977	0.0987771	0.0550455
QDPR	Enzyme	0.00720064	0.00241368	-0.391365	-0.443641	DYSF	Receptor Binding	0.0113183	0.000465542	-0.443084	-0.716242
SLIT2	Ig	0.00675527	0.0621081	0.410925	0.353537	GPC1	CAM	0.0145086	0.00346542	-0.31762	-0.423867
