# Supplementary material for: Deep proteome profiling reveals signatures of age and sex differences in paw skin and sciatic nerve of naïve mice
Source: eLife. 2022 Nov 30;11:e81431. doi: 10.7554/eLife.81431 (PMC9711526; doi:10.7554/eLife.81431)
Supplement: Figure 5—source data 1. [file elife-81431-fig5-data1.xlsx]

## Sheet: Sheet1
Comparison between sex-associated genes from human tibial nerve study with SCN proteome ( doi: 10.3389/fnmol.2019.00037. eCollection 2019, table 2)										Examples shown in Figure5-figure supplement 1
	q value				Log2FC					q value ≤0.05
Gene Name	SCN_Fe4w/SCN_Fe14w	SCN_Ma4w/SCN_Ma14w	SCN_Ma4w/SCN_Fe4w	SCN_Ma14w/SCN_Fe14w	SCN_Fe4w/SCN_Fe14w	SCN_Ma4w/SCN_Ma14w	SCN_Ma4w/SCN_Fe4w	SCN_Ma14w/SCN_Fe14w
Ada	0.406896	0.375842	0.931925	0.97608	-0.209458	-0.167029	0.0725118	0.0300836
Atp8a2	0.841073	0.976154	0.838257	0.984538	0.0573111	0.00599497	-0.0735829	-0.0222668
C4b	0.031749	0.00228579	0.718858	0.882522	-0.481521	-0.332166	0.226138	0.0767824
Ca5b	0.159267	0.0676266	0.986472	0.992479	-0.412222	-0.379359	0.0258174	-0.0070454
Ca8	0.0357421	0.991497	0.645443	0.818151	0.98616	0.00392964	-0.558137	0.424093
Cadps	0.0106583	0.00140799	0.970236	0.978987	-0.473756	-0.466259	0.0207397	0.0132421
Ddx3x	0.118624	0.0443002	0.516006	0.308914	0.312358	0.32834	-0.472541	-0.488523
Drp2	0.00448257	0.000103418	0.801305	0.978987	-0.658117	-0.755948	-0.0825716	0.0152587
Dync1i1	0.0125688	0.00195329	0.759749	0.97791	-0.656952	-0.473306	0.16281	-0.0208354
Eif1ax	0.0888349	0.0874174	0.95609	0.83123	0.609662	0.312809	-0.0400466	0.256806
Fabp7	0.0391573	0.0164708	0.817547	0.773191	0.91926	1.93998	0.211322	-0.809394
Fh	0.371536	0.0121732	0.734146	0.863623	-0.150262	-0.439428	-0.164765	0.124401
Hp	0.264784	0.178906	0.615745	0.107424	-0.503887	-1.82467	3.12387	4.44466
Hsd11b1	0.0399712	5.88737e-05	0.98082	0.00851636	-0.508316	-2.25792	0.0202271	1.76983
Lum	0.00187975	0.000134111	0.791392	0.665544	-0.657211	-0.926749	-0.118991	0.150547
Map7d2	0.00748883	0.00423275	0.967335	0.978987	-0.516102	-0.502632	0.028713	0.015243
Mustn1	0.250764	0.00384427	0.954444	0.658498	-0.630812	-1.29309	0.0873347	0.749614
Nudt4	0.0104477	0.0639513	0.809178	0.837923	-0.604736	-0.325555	0.174103	-0.105079
Pdgfra	0.248342	0.0513834	0.857846	0.97608	0.173537	0.274737	0.0826704	-0.0185295
Pgbd5	0.0537154	0.00758764	0.984037	0.551221	-0.308326	-0.61642	-0.0175464	0.290547
Ptpn9	0.969559	0.932966	0.912784	0.867739	0.00559744	-0.011069	0.0542573	0.0709237
Ralgps2	0.026978	0.00341645	0.995721	0.907295	-0.447541	-0.516919	0.0052289	0.0746062
Rap1gap2	0.00294511	0.00653239	0.946111	0.949082	-0.580717	-0.604082	-0.0555089	-0.0321442
Reep1	0.642532	0.0128728	0.96163	0.731141	-0.138348	-0.348281	-0.0679086	0.142024
Rps4x	0.00145528	0.000640427	0.785162	0.97791	0.682313	0.548489	-0.123218	0.0106051
Snrpg	0.0350087	0.000458262	0.717496	0.929927	0.412837	0.68516	0.22476	-0.0475639
Ssc5d	0.402128	0.0712764	0.963566	0.354932	0.385191	-0.416203	-0.0924153	0.708979
Stra6	0.9347	0.075133	0.645443	0.946143	0.0383676	0.492303	0.337312	-0.116624
Synm	0.00321046	0.000222026	0.829767	0.991225	-0.574736	-0.65509	-0.0755852	0.00476842
Tango6	0.718745	0.568013	0.995982	0.994025	0.211284	0.217594	-0.00858411	-0.0148939
Tf	0.355517	0.7371	0.809178	0.136202	-0.184681	0.0514046	-0.182725	-0.418811
