# Supplementary material for: Deep proteome profiling reveals signatures of age and sex differences in paw skin and sciatic nerve of naïve mice
Source: eLife. 2022 Nov 30;11:e81431. doi: 10.7554/eLife.81431 (PMC9711526; doi:10.7554/eLife.81431)
Supplement: Figure 5—source data 2. [file elife-81431-fig5-data2.xlsx]

## Sheet: Sheet1
Comparison sex-associated gene list from mouse hind paw study with skin proteome (doi: 10.1038/s41598-020-72285-z, supplementay Table 2, FC>1.5, q-value<0.05)										Proteins with sex-dependent significance at 4 weeks and/or 14 weeks
	q value				Log2FC					q value ≤0.05
Gene Name	Skin_Fe4w/Fe14w	Skin_Ma4w/Ma14w	Skin_Ma4w/Fe4w	Skin_Ma14w/Fe14w	Skin_Fe4w/Fe14w	Skin_Ma4w/Ma14w	Skin_Ma4w/Fe4w	Skin_Ma14w/Fe14w
Agt	0.26299	0.268083	0.892414	0.393638	0.411357	0.68487	-0.171009	-0.444522
Akr1c18	0.405931	0.196107	0.264223	0.881594	-0.628878	-1.01283	-0.793141	-0.409189
Alox12e	0.173492	0.644343	0.000735531	0.0108795	-0.572136	-0.322692	-1.96316	-2.21261
Aox4	0.353163	0.500384	0.00648403	0.0955587	0.365629	0.494933	1.48428	1.35497
Aspn	0.221761	0.00612997	0.824231	0.0196741	-0.286859	-1.15248	0.0846697	0.95029
Atp1b1	0.861517	0.820446	0.945246	0.902454	-0.12906	0.19428	0.110825	-0.212514
Col1a1	0.00601126	0.00612997	0.35617	0.00585686	2.01627	1.54175	0.972434	1.44695
Col1a2	0.00294759	0.0062647	0.495932	0.0324774	2.05668	1.68398	0.663517	1.03622
Col3a1	0.000800978	0.00612997	0.359374	0.231524	2.77337	2.65539	0.747451	0.865425
Cyp27a1	0.736854	0.813108	0.720265	0.972829	0.127075	0.350794	0.310212	0.0864923
Fetub	0.187871	0.889018	0.35992	0.978893	-0.567237	-0.097858	0.42245	-0.0469295
Fmo5	0.12081	0.161708	0.128893	0.545711	-0.389487	-0.588624	-0.580186	-0.381049
H2-Ab1	0.0579309	0.822182	0.303544	0.0790768	-0.979324	-0.136329	-0.482359	-1.32535
H2-Q10	0.704985	0.362631	0.839693	0.736811	0.135001	0.842858	0.221191	-0.486666
Hal	0.114621	0.688544	0.00320192	0.063575	0.390746	-0.187422	-1.4277	-0.849534
Hexa	0.801246	0.701451	0.861841	0.85927	-0.0954565	0.309173	0.12027	-0.284359
Hmgcs2	0.014945	0.994328	0.207569	0.000510451	1.16403	-0.00456457	0.907845	2.07644
Hspa12a	0.908819	0.548194	0.246145	0.857848	-0.0339969	-0.222249	-0.357499	-0.169247
Il1r2	0.912822	0.705506	0.622459	0.948028	0.0468527	-0.178538	-0.299607	-0.0742167
Inmt	0.00294759	0.00127936	0.256612	0.00969697	-2.67193	-3.34336	1.23892	1.91035
Krt1	0.0051886	0.341565	0.359374	0.913524	-1.21135	-0.923314	0.519741	0.231708
Krt31	0.0530667	0.997591	0.680788	0.22971	1.11333	0.00165308	-0.453628	0.658046
Krt32	0.211398	0.93686	0.604789	0.978893	0.540292	-0.0836214	-0.586553	0.0373609
Krt36	0.563792	0.22472	0.810955	0.03586	0.184584	-1.00123	0.228182	1.414
Krt75	0.256838	0.759936	0.910782	0.5473	-0.670498	-0.246452	-0.186899	-0.610945
Krt84	0.401045	0.252584	0.958561	0.0201093	0.218841	-0.754146	0.0542004	1.02719
Lrrc15	0.376298	0.40533	0.566473	0.736811	0.499268	-0.396168	-0.385756	0.50968
Lyz2	0.211474	0.583284	0.35992	0.648086	-0.59777	-1.52604	0.883866	1.81214
Nid1	0.111825	0.528898	0.872576	0.243281	0.307709	-0.230908	-0.0645874	0.474029
Olah	0.620284	0.758446	0.136756	0.0120561	-0.174744	0.15986	-0.888293	-1.2229
Orm1	0.841439	0.882436	0.640663	0.787787	0.283483	-0.141509	0.502011	0.927002
Pglyrp4	0.111018	0.832466	0.333327	0.00969697	-0.496584	0.131989	-0.610754	-1.23933
Pla2r1	0.79457	0.326044	0.128893	0.941785	-0.11468	0.536969	0.75788	0.106232
Rgn	0.972444	0.545199	0.348418	0.972829	-0.00895767	-0.484582	-0.417797	0.0578281
Rptn	0.0140155	0.877264	0.0159337	0.925898	-1.76087	0.231518	2.24543	0.253051
Serpina3b	0.214636	0.401072	0.0109736	0.339136	0.602712	-0.308993	-1.64955	-0.737849
Serpinb12	0.0276613	0.599519	0.0514078	0.765901	-0.692748	-0.46092	0.696335	0.464507
Serpine2	0.306747	0.88749	0.839693	0.343299	0.450759	-0.126869	0.199419	0.777047
Smpdl3a	0.492896	0.213728	0.692242	0.349575	-0.326365	-0.728224	0.334277	0.736136
Sparc	0.00273709	0.0194604	0.505601	0.485308	2.02286	1.85633	0.524933	0.691463
Tgm5	0.00438669	0.790554	0.264223	0.941785	-0.888236	-0.328999	0.700564	0.141327
Tnn	0.722345	0.311036	0.872576	0.510014	-0.19928	-1.50769	-0.363727	0.944687
