# Supplementary material for: Deep proteome profiling reveals signatures of age and sex differences in paw skin and sciatic nerve of naïve mice
Source: eLife. 2022 Nov 30;11:e81431. doi: 10.7554/eLife.81431 (PMC9711526; doi:10.7554/eLife.81431)
Supplement: Figure 6—source data 1. [file elife-81431-fig6-data1.xlsx]

## Sheet: SkinDiseaseRelatedProteins
Comparison paw skin proteome with top candidates of skin diseases (https://biohub.skinsciencefoundation.org/)
	q value				Log2FC						q value ≤0.05
Gene Name	Skin_Fe4w/Fe14w	Skin_Ma4w/Ma14w	Skin_Ma4w/Fe4w	Skin_Ma14w/Fe14w	Skin_Fe4w/Fe14w	Skin_Ma4w/Ma14w	Skin_Ma4w/Fe4w	Skin_Ma14w/Fe14w
Mapk1	0.926298	0.912114	0.95201	0.896391	0.0188418	-0.0536677	0.024343	0.0968525
Sugt1	0.657583	0.979392	0.968836	0.938987	-0.109387	-0.0179765	0.0191678	-0.0722427
Plin2	0.174999	0.221859	0.419282	0.273748	0.631744	0.550548	0.606272	0.687467
Usp34	0.582671	0.985985	0.932126	0.793652	-0.144821	0.0124591	-0.0615331	-0.218813
Son	0.571116	0.863666	0.941427	0.831423	-0.117491	0.0759229	0.0350111	-0.158403
Bcat2	0.66554	0.998522	0.752479	0.989933	0.104656	0.00116879	-0.120982	-0.0174952
Kif5b	0.152265	0.884812	0.612746	0.799847	-0.252325	0.0634941	0.149356	-0.166464
Cltc	0.582671	0.970698	0.776089	0.959533	-0.123917	0.0273822	0.0937798	-0.0575198
Cnp	0.110254	0.903072	0.538693	0.936047	0.569251	0.129124	-0.300695	0.139432
Sf3b1	0.808029	0.744132	0.923759	0.856969	-0.0501804	0.120658	0.0396716	-0.131167
Col15a1	0.0835655	0.270177	0.680178	0.791493	0.402343	0.482096	-0.154671	-0.234424
Flnb	0.274652	0.878252	0.417463	0.89564	-0.193014	-0.0675632	0.228548	0.103097
Hnrnpm	0.955699	0.99188	0.932848	0.943638	0.0127447	-0.00849624	0.0407586	0.0619996
Chmp4b	0.878027	0.439407	0.793946	0.887881	0.074324	0.427177	0.11974	-0.233113
Fus	0.968794	0.453412	0.722357	0.891305	0.0136637	0.313955	0.139751	-0.16054
Qdpr	0.995227	0.861433	0.868107	0.969926	-0.00203108	-0.0814029	-0.116113	-0.036741
Tubgcp3	0.497545	0.924138	0.760266	0.976761	-0.133356	-0.0621258	0.105226	0.033996
Huwe1	0.630718	0.78683	0.95201	0.985561	-0.0925885	-0.0985328	-0.0208431	-0.0148988
Sdr9c7	0.46224	0.303113	0.544376	0.999629	-0.272409	-0.752746	-0.473309	0.00702921
Hspa12b	0.0697172	0.661773	0.360137	0.983064	0.592143	0.263028	-0.361135	-0.0320207
Elf1	0.25865	0.485672	0.956009	0.913524	0.295826	0.358894	-0.0455509	-0.108619
Pxmp4	0.0105288	0.661773	0.388819	0.956878	0.662827	0.229209	-0.377314	0.0563037
Hk2	0.340787	0.547464	0.844604	0.789919	-0.174004	-0.484245	0.0798235	0.390065
Acad8	0.864617	0.970698	0.805489	0.955186	0.0476942	0.0264307	-0.0829354	-0.0616719
Slc16a1	0.814616	0.730911	0.794219	0.957082	-0.0542233	-0.128674	-0.116983	-0.0425325
Mbnl1	0.920113	0.978187	0.863201	0.757242	-0.0600401	-0.0306822	-0.264141	-0.293499
Acsbg1	0.685593	0.813108	0.266078	0.129513	-0.118314	-0.102455	-0.550149	-0.566007
Top2b	0.404453	0.960469	0.868809	0.734847	-0.185263	-0.0245856	-0.068777	-0.229454
Sh3pxd2a	0.825268	0.905865	0.802918	0.995642	0.0785412	-0.0545464	-0.120512	0.012576
Tmf1	0.363411	0.262361	0.538693	0.997639	0.229981	0.463817	0.223688	-0.0101481
Macf1	0.0763061	0.806857	0.542846	0.701182	-0.354603	0.11437	0.213542	-0.255431
Tgfbi	0.0219268	0.22472	0.900029	0.844757	-0.64051	-0.54855	-0.0781676	-0.170128
Hr	0.530954	0.893794	0.945887	0.940438	-0.167258	-0.118133	-0.0497346	-0.0988588
Syf2	0.109539	0.697272	0.791417	0.970693	-0.437246	-0.298728	0.195764	0.0572465
Gnb1	0.0415117	0.654725	0.977177	0.563185	-0.525973	-0.202535	-0.0171073	-0.340545
Egfr	0.990036	0.891165	0.130194	0.256295	-0.00234386	0.0640864	0.468293	0.401863
Eef2k	0.969315	0.979392	0.383044	0.720066	0.0107284	0.0147227	-0.257212	-0.261207
Pdcd5	0.614265	0.45039	0.745648	0.970674	0.231937	0.412248	0.105864	-0.0744467
Aph1a	0.0697172	0.449199	0.68447	0.956944	-0.630366	-0.555573	0.174612	0.0998185
Ifih1	0.277332	0.822182	0.882219	0.812451	-0.410223	-0.188762	-0.123143	-0.344605
Pdzk1ip1	0.273208	0.871646	0.663705	0.998973	-0.410652	-0.13622	0.264091	-0.0103418
Map6	0.604907	0.601764	0.512335	0.884783	-0.0975067	0.280251	0.213149	-0.164608
Ppp1cc	0.884105	0.838165	0.675792	0.849253	0.0542163	0.166006	-0.166297	-0.278087
Tnc	0.307362	0.295433	0.98009	0.678393	-0.443449	-1.20303	0.0229387	0.782525
Tm9sf2	0.402743	0.997591	0.70324	0.981714	-0.192451	0.00214339	0.171617	-0.0229777
Glg1	0.184168	0.213728	0.667536	0.949289	0.248181	0.449014	0.151172	-0.0496611
Col6a6	0.0250699	0.0164581	0.722357	0.813795	1.08584	1.26899	-0.141727	-0.324878
Nt5e	0.110254	0.875494	0.871883	0.762309	0.424074	0.0868499	-0.106172	0.231051
Acsl5	0.284618	0.650156	0.667536	0.970674	0.311133	0.172221	-0.183307	-0.0443942
Ttc22	0.966786	0.90879	0.755298	0.926829	-0.0153263	-0.06155	-0.147966	-0.101742
Xdh	0.693015	0.597194	0.930973	0.913524	-0.0943885	-0.253665	-0.03538	0.123897
Krt16	0.00284028	0.470518	0.0404224	0.653798	-1.59533	-1.87873	1.47334	1.75673
Gdpd3	0.454239	0.914119	0.207569	0.941785	0.213644	-0.159785	-0.530239	-0.156809
Fa2h	0.0309143	0.239497	0.365543	0.0929197	1.10546	0.606673	0.560743	1.05953
Tf	0.725162	0.988686	0.73459	0.563185	-0.147739	0.0174125	-0.34336	-0.508512
Slc5a1	0.0182793	0.193483	0.894058	0.762916	-0.975464	-0.73105	-0.090223	-0.334637
Krt6a	0.0027647	0.341644	0.0459288	0.654675	-1.38001	-1.68698	0.914651	1.22162
Ncor1	0.899955	0.925059	0.663705	0.949489	-0.040522	0.0603748	0.169582	0.0686847
Samd9l	0.196343	0.982288	0.922408	0.771829	-0.314574	-0.0153031	0.0604514	-0.23882
Ltbp4	0.254612	0.219117	0.982046	0.814543	0.333766	0.593774	0.0108697	-0.249138
Hook3	0.385732	0.0923001	0.618519	0.789919	0.203146	0.585845	0.170451	-0.212248
Smc3	0.416848	0.959214	0.95201	0.838816	-0.151331	0.0299056	0.0273633	-0.153873
Rcn2	0.272525	0.897527	0.894806	0.924707	-0.564713	-0.174213	0.170881	-0.219619
Npl	0.0143785	0.654525	0.495932	0.22971	1.5698	0.218635	-0.622961	0.7282
Tgm2	0.62741	0.262361	0.589962	0.832321	-0.154016	-0.686896	-0.258745	0.274136
Ncf2	0.485732	0.622944	0.599544	0.815878	-0.259035	-0.35612	0.258259	0.355345
Clec10a	0.877786	0.347208	0.755383	0.857848	-0.0754269	-0.557286	-0.217262	0.264596
Tpm4	0.0764616	0.69726	0.382189	0.654675	-0.383864	0.213856	0.222232	-0.375489
Acyp1	0.276097	0.458484	0.78929	0.4535	-0.287287	0.248477	0.100245	-0.435518
Pxdn	0.0235928	0.238399	0.410731	0.0759185	0.886248	0.423427	0.367646	0.830467
Dlx3	0.909146	0.332772	0.839693	0.799847	0.05473	0.529447	0.172057	-0.30266
Abi1	0.172756	0.942241	0.76105	0.830224	-0.244193	0.0493768	0.0955527	-0.198017
Plod1	0.00601126	0.00612997	0.359374	0.895152	1.17683	1.44474	0.420983	0.153069
Acsl1	0.91054	0.62338	0.0596173	0.754247	0.0258242	-0.225033	-0.513428	-0.262571
Glo1	0.888224	0.888228	0.967336	0.965939	-0.0586318	-0.124204	0.0185428	0.0841154
Edf1	0.949397	0.622944	0.320852	0.941785	-0.0237627	0.350596	0.486288	0.11193
Snx3	0.930142	0.882737	0.781117	0.963227	0.0400762	0.0978859	0.13458	0.0767705
Ptges	0.76054	0.784258	0.538693	0.984413	-0.202465	0.303916	0.558233	0.0518517
Ipo7	0.869871	0.871453	0.60511	0.96232	-0.041229	0.0825952	0.173297	0.0494723
Psma3	0.62506	0.770319	0.95201	0.933815	-0.0919335	-0.152299	0.0231352	0.0835003
Dock2	0.217671	0.687614	0.865103	0.985889	-0.392705	-0.250724	0.11566	-0.0263204
Tk1	0.963914	0.892069	0.939888	0.93266	-0.0271868	-0.0800638	0.0747852	0.127662
Mbd2	0.987058	0.528898	0.790543	0.860636	0.00531772	0.35403	0.122634	-0.226079
Ints5	0.825904	0.622944	0.862806	0.79562	-0.0700938	-0.26829	0.0891298	0.287326
Steap4	0.391431	0.703321	0.984717	0.566189	0.383256	-0.226906	-0.0132381	0.596924
Syne1	0.47236	0.940349	0.623617	0.943234	-0.143502	-0.0485622	0.161839	0.0668993
Inpp5b	0.345321	0.565929	0.94879	0.972829	-0.208656	-0.203337	0.0354333	0.0301142
Xrcc5	0.468	0.284435	0.866499	0.950318	-0.238796	-0.424432	-0.120901	0.0647354
Msn	0.158051	0.981514	0.60511	0.915241	-0.272332	0.0195276	0.170886	-0.120974
Acadl	0.781634	0.968319	0.762006	0.909468	0.0603042	0.036044	-0.147151	-0.122891
Alad	0.144561	0.591402	0.604789	0.844757	0.335027	0.211796	-0.26626	-0.143029
Pex13	0.685593	0.641903	0.91718	0.789919	0.202683	-0.22692	-0.119395	0.310209
Gpt2	0.803069	0.438721	0.688327	0.838598	0.121835	-0.395793	-0.230282	0.287346
Fgl2	0.0549133	0.0347717	0.927216	0.804842	0.773061	0.888318	-0.0902918	-0.205549
Usp7	0.323144	0.530286	0.916891	0.969982	-0.197021	-0.206577	-0.0446437	-0.0350877
Ptpn6	0.275613	0.77835	0.835639	0.510014	-0.196105	0.170458	-0.0796201	-0.446183
Fbln1	0.805739	0.706066	0.641306	0.715099	-0.0556653	-0.154196	0.15748	0.256011
Acat2	0.57328	0.682703	0.933656	0.731949	0.121269	-0.153631	-0.0444073	0.230493
Cul1	0.891526	0.827696	0.956535	0.913524	-0.0436633	0.0828592	0.0223713	-0.104151
Mst1r	0.563792	0.583807	0.389853	0.93266	-0.203009	-0.444971	-0.399646	-0.157684
Lcn2	0.905441	0.502827	0.538693	0.256606	0.166279	-2.56915	1.60218	4.33761
Tmprss4	0.369931	0.352315	0.151319	0.876772	0.159249	-0.566139	-0.526898	0.19849
Sun1	0.479546	0.997591	0.876088	0.926829	-0.158611	0.00123437	0.0761117	-0.0837333
Thbs1	0.360394	0.455067	0.498223	0.754032	-0.238663	0.409668	0.321438	-0.326893
Actn1	0.47826	0.323829	0.984717	0.736811	-0.244388	-0.733248	-0.0110731	0.477787
Itm2b	0.128283	0.470518	0.939888	0.917587	-0.335028	-0.215214	0.039912	-0.0799022
Prkcb	0.240633	0.965343	0.276952	0.961549	0.369248	0.0318381	-0.404638	-0.0672287
Birc6	0.919904	0.942241	0.917731	0.978893	-0.0236339	-0.0407149	-0.0435721	-0.0264911
Gatm	0.957973	0.490171	0.900105	0.789919	-0.0271117	0.509667	0.0896918	-0.447087
Dnase1l2	0.705275	0.283085	0.999434	0.743211	-0.1628	-0.520307	-0.00162819	0.355879
Pdha1	0.707751	0.425964	0.865103	0.582123	0.0787472	-0.39695	-0.0631546	0.412542
Myo1g	0.16477	0.750368	0.803345	0.534417	-0.6842	0.256983	0.150673	-0.79051
Csde1	0.0716258	0.695683	0.76105	0.926829	-0.355878	-0.169539	0.099186	-0.0871527
Ptpn12	0.555151	0.852196	0.924894	0.978893	0.122578	0.101608	-0.0480972	-0.0271277
Atp7a	0.415717	0.620707	0.888843	0.942417	-0.193352	-0.195434	0.0647722	0.0668543
Fgfr1op2	0.867324	0.994328	0.970881	0.976761	0.0519065	-0.00504511	-0.0239998	0.0329518
Ap1s1	0.8166	0.957992	0.974254	0.999629	-0.0744651	-0.0471088	0.0230625	-0.00429384
Gabarapl2	0.377893	0.702053	0.894806	0.887881	-0.19132	-0.153442	-0.0756253	-0.113503
Tgm1	0.254028	0.530788	0.872576	0.964221	-0.280846	-0.449149	-0.0882303	0.0800725
Tmprss11d	0.0671376	0.494418	0.658793	0.967761	-0.802986	-0.397156	0.341544	-0.0642863
Fmo1	0.979262	0.494781	0.530706	0.963227	0.0127741	-0.334154	-0.416109	-0.0691809
Gfpt2	0.724441	0.545199	0.889903	0.720284	-0.118552	0.405573	0.107318	-0.416806
Chm	0.738143	0.969663	0.807004	0.999629	-0.11587	0.0320571	0.141184	-0.00674319
Atp6v0a1	0.589319	0.940349	0.894768	0.913524	-0.147073	-0.0591025	-0.0572622	-0.145233
Arpc5	0.573794	0.981869	0.754119	0.967761	-0.208991	-0.0204506	0.112415	-0.0761255
Idh1	0.594618	0.744607	0.95201	0.914186	0.131193	0.248198	-0.0388375	-0.155843
Drap1	0.954188	0.994328	0.871801	0.979766	0.0266256	-0.00408181	-0.0709172	-0.0402098
Pex5	0.252958	0.656622	0.861841	0.93266	0.244714	0.24027	-0.0988342	-0.0943895
Ncl	0.0592497	0.564143	0.863201	0.998738	-0.373683	-0.293405	0.0726067	-0.00767101
Iqgap1	0.181275	0.891165	0.692242	0.813795	-0.244514	0.0858404	0.119677	-0.210677
Krt79	0.492026	0.318376	0.872576	0.731949	-0.218215	-0.432652	0.107333	0.321771
Lrp4	0.919778	0.681917	0.5236	0.970818	0.0349096	-0.189618	-0.268219	-0.0436915
Crabp2	0.0157691	0.0715055	0.281996	0.590636	-0.75567	-0.850539	-0.465231	-0.370363
Rsl1d1	0.240633	0.839917	0.779163	0.979766	-0.27814	-0.117085	0.132493	-0.0285617
Abcc1	0.242741	0.801399	0.727762	0.646391	-0.221572	-0.105628	-0.136616	-0.25256
Tax1bp1	0.976198	0.608334	0.715307	0.924003	-0.00851716	0.230354	0.132539	-0.106332
Plekhg5	0.535343	0.32374	0.947798	0.941785	-0.238589	-0.377028	-0.0544879	0.0839512
Tmtc3	0.761723	0.61611	0.625544	0.935925	0.0647179	0.16381	0.160123	0.0610308
Ddx42	0.955218	0.633852	0.979313	0.850923	0.0139401	0.153986	-0.00906343	-0.14911
Lrrc1	0.6869	0.619504	0.896432	0.949289	-0.180686	-0.186714	0.0808722	0.0869003
Echdc1	0.215276	0.8966	0.694189	0.397905	0.381512	0.0733187	0.197024	0.505217
Smpd1	0.985527	0.372362	0.359374	0.913524	-0.00793848	-0.786046	-0.555078	0.22303
Pcm1	0.632953	0.748598	0.917731	0.989933	0.0960571	0.157862	0.0461536	-0.0156513
Fdps	0.926423	0.95039	0.803345	0.942417	0.0253308	-0.040751	-0.129043	-0.0629609
Mme	0.542602	0.0733145	0.151319	0.956455	0.293084	-0.796701	-1.0111	0.0786833
Pip5k1a	0.557965	0.530286	0.904966	0.896391	-0.147734	-0.396681	-0.0871139	0.161833
Tgm3	0.0339789	0.528898	0.359374	0.901692	-0.594447	-0.485669	0.31213	0.203351
Alox12b	0.492896	0.506924	0.722357	0.98277	-0.210031	-0.473536	-0.228184	0.0353207
Fbp1	0.191785	0.902668	0.923759	0.137059	-0.774191	0.127503	-0.163408	-1.0651
Atp6v1c2	0.129698	0.971872	0.994338	0.546255	-0.473643	0.0407703	0.00579407	-0.508619
Aldh1a1	0.558358	0.994328	0.990147	0.825342	0.304953	-0.00716752	0.0158252	0.327946
Ncbp1	0.983058	0.832176	0.95201	0.935925	-0.00504579	-0.104279	-0.0321605	0.0670726
Aco1	0.18632	0.596108	0.762006	0.949289	0.286292	0.197359	-0.13913	-0.0501973
Txndc9	0.594689	0.826249	0.95201	0.866372	-0.191801	-0.105306	-0.0579083	-0.144404
Cyp39a1	0.862334	0.972072	0.876088	0.910209	-0.0401759	-0.0280652	-0.0938118	-0.105923
Cdk4	0.919257	0.971096	0.95023	0.972829	-0.0544036	-0.0347786	0.0695392	0.0499141
Chmp5	0.839647	0.929733	0.605261	0.809215	-0.123894	0.079284	-0.226927	-0.430105
Sdc4	0.014945	0.626759	0.910782	0.545711	-0.800801	-0.346157	-0.0865112	-0.541156
Rab7a	0.150595	0.880861	0.949055	0.891277	-0.252784	-0.0893807	0.0241191	-0.139284
Vcan	0.0198211	0.886138	0.309564	0.582123	-0.708036	0.0852631	0.431424	-0.361875
Pten	0.705662	0.621996	0.966372	0.970788	0.138167	0.213282	0.0319011	-0.0432141
Rai14	0.57328	0.783963	0.483476	0.767386	0.1208	0.121857	-0.222361	-0.223417
Stau1	0.987603	0.568837	0.598699	0.978893	0.00364636	0.212215	0.183041	-0.0255275
Cyp27a1	0.736854	0.813108	0.720265	0.972829	0.127075	0.350794	0.310212	0.0864923
Rad21	0.525236	0.962895	0.956224	0.89564	-0.14902	0.0454104	0.0306866	-0.163744
Krt77	0.787761	0.622944	0.970881	0.858385	-0.121313	-0.31468	0.0385977	0.231964
Ddx6	0.172756	0.888228	0.794831	0.900208	-0.29308	-0.0816248	0.0846294	-0.126826
Slc15a1	0.618472	0.534715	0.876088	0.970788	-0.137937	-0.286529	-0.109126	0.0394657
Gda	0.396317	0.93686	0.790543	0.988224	-0.285653	-0.0681603	0.194618	-0.0228747
Eif2ak2	0.918217	0.802795	0.913513	0.930692	-0.0314017	0.113643	0.0605604	-0.0844839
Mef2d	0.147582	0.650963	0.915408	0.906841	0.40597	0.295889	0.0614467	0.171527
Znfx1	0.36524	0.979392	0.760266	0.925898	-0.211859	0.0153822	0.143834	-0.083407
Arpc2	0.161635	0.837408	0.894806	0.89564	-0.27165	-0.101624	0.048253	-0.121773
Serpinb5	0.0373546	0.518843	0.824174	0.89564	-0.452656	-0.252761	0.0815335	-0.118362
Psat1	0.299011	0.853704	0.893069	0.740698	0.204693	-0.0882035	-0.0508034	0.242094
Acadvl	0.760988	0.953294	0.969123	0.926829	0.0598909	-0.0347975	-0.0143421	0.0803463
Inpp4a	0.720888	0.564143	0.825272	0.797791	-0.145902	-0.32235	0.142377	0.318825
Carhsp1	0.151393	0.709894	0.960255	0.866372	0.498276	0.23519	-0.0376201	0.225465
Rock1	0.834642	0.663664	0.886877	0.848752	-0.0490854	0.169949	0.0536042	-0.16543
Hmgcs1	0.598978	0.69726	0.996611	0.988688	-0.118405	-0.130208	0.00228639	0.0140899
Gja1	0.0668561	0.40223	0.877747	0.992729	-0.495752	-0.390886	0.117804	0.0129373
Crip2	0.110254	0.818232	0.471208	0.791493	-0.606225	0.157922	0.453691	-0.310456
Gclm	0.571116	0.577921	0.807004	0.736811	-0.138229	0.287285	0.125075	-0.300439
Hspa12a	0.908819	0.548194	0.246145	0.857848	-0.0339969	-0.222249	-0.357499	-0.169247
Dtx3l	0.850209	0.322063	0.993432	0.563185	-0.074928	-0.562334	0.00667202	0.494078
Zdhhc13	0.0901985	0.985759	0.509771	0.967761	-0.399411	-0.016084	0.331386	-0.0519409
Fchsd1	0.0668561	0.656252	0.388147	0.927953	-0.542024	-0.259292	0.398148	0.115415
Bri3bp	0.408523	0.992147	0.664575	0.978893	-0.426503	-0.0114527	0.363226	-0.0518244
Lamc3	0.62022	0.99239	0.650796	0.978893	-0.244782	-0.0140972	0.290639	0.0599543
Slc7a5	0.0723776	0.401072	0.940408	0.96311	-0.659615	-0.515107	0.075231	-0.069277
Xpc	0.575934	0.570318	0.752479	0.799847	0.201419	-0.250061	-0.186286	0.265194
Pltp	0.0697172	0.9817	0.821647	0.545711	-0.476831	0.0162348	0.128177	-0.364889
Tuba1c	0.481993	0.977861	0.921926	0.954554	-0.192752	-0.0411764	0.0436563	-0.107919
Rac2	0.978554	0.140829	0.945133	0.0883001	-0.013858	-1.25635	-0.101321	1.14117
Serpina9	0.20224	0.859144	0.550806	0.967761	-0.494722	-0.121072	0.302356	-0.0712937
Mapre3	0.47239	0.303113	0.698482	0.89564	-0.16135	-0.42607	-0.13158	0.13314
Ca2	0.266113	0.925767	0.965807	0.278224	-0.781619	0.107932	0.0928986	-0.796653
Cd200	0.854603	0.724484	0.604723	0.997639	-0.0452894	-0.209197	-0.177091	-0.0131837
Acot9	0.821311	0.787281	0.759128	0.88112	-0.0597304	-0.111162	0.0917618	0.143193
Slc7a1	0.603175	0.926981	0.5236	0.937619	-0.224292	0.155078	0.56248	0.18311
Dvl1	0.555792	0.718298	0.729731	0.857848	0.206734	-0.198012	-0.176872	0.227875
Ddx58	0.386839	0.962895	0.955688	0.813795	0.15738	0.0263217	0.0253736	0.156432
Aqp3	0.683615	0.622953	0.68447	0.61479	0.225145	-0.417307	0.165518	0.80797
Dpp4	0.158301	0.737417	0.210505	0.984921	0.328966	-0.144756	-0.453852	0.0198698
Gstm5	0.729056	0.981231	0.859011	0.970818	0.0982595	0.0151753	-0.116758	-0.0336734
Dnm1	0.268921	0.347208	0.945133	0.812451	0.267973	0.384037	-0.0563075	-0.172372
Tmprss11e	0.344258	0.935967	0.95201	0.813795	-0.458176	-0.0617231	0.0452814	-0.351171
Slc30a5	0.362155	0.709894	0.410731	0.925898	0.221039	-0.258362	-0.342071	0.13733
Alox15	0.268921	0.710148	0.608917	0.538575	-0.966414	-0.321343	-0.526254	-1.17132
F12	0.325338	0.656465	0.735282	0.731949	-0.282645	0.247804	0.284604	-0.245846
Col5a1	0.0129636	0.0566058	0.347097	0.03586	1.33024	1.0018	0.750384	1.07882
Cd180	0.0864727	0.791919	0.32626	0.640442	-0.792592	0.125729	0.421941	-0.496379
Actb	0.391542	0.960469	0.863201	0.895066	-0.38333	0.0811311	0.147544	-0.316917
Nsa2	0.194856	0.825705	0.827268	0.978893	-0.305385	-0.157871	0.175598	0.0280834
Nceh1	0.310147	0.601764	0.421198	0.216384	-0.192996	0.311662	-0.239332	-0.74399
Tagln2	0.429288	0.994328	0.264223	0.978893	-0.442642	-0.00906352	0.367244	-0.0663344
Aadac	0.191611	0.911325	0.823946	0.788456	0.639629	0.0840148	-0.23849	0.317125
Prss27	0.530954	0.200935	0.722357	0.715093	-0.272438	-1.14727	-0.341046	0.533789
Pglyrp4	0.111018	0.832466	0.333327	0.00969697	-0.496584	0.131989	-0.610754	-1.23933
Stat2	0.377408	0.621457	0.968836	0.4535	-0.277311	0.306154	-0.0254478	-0.608913
Rgn	0.972444	0.545199	0.348418	0.972829	-0.00895767	-0.484582	-0.417797	0.0578281
Rapgefl1	0.772769	0.728723	0.84337	0.856969	0.102561	0.211506	-0.123522	-0.232467
Akt1	0.81539	0.844979	0.95201	0.997639	0.0678809	0.0977619	0.038063	0.00818201
Lsm14a	0.172756	0.59664	0.62992	0.654675	-0.357385	0.452374	0.252622	-0.557137
Casp1	0.057263	0.78195	0.982046	0.732943	-0.365505	-0.13123	-0.00837488	-0.24265
Tmem65	0.670725	0.914119	0.755298	0.849253	-0.101892	-0.0517142	-0.108328	-0.158506
Osbp	0.965143	0.938457	0.943997	0.998001	0.0108158	0.0461669	0.0276727	-0.00767842
Atp6v1c1	0.703224	0.814884	0.78929	0.91684	-0.0789484	0.0997931	0.0876224	-0.0911191
Pgrmc1	0.888224	0.339242	0.803345	0.868481	-0.0729698	-0.479064	-0.155699	0.250395
Prdx6	0.76658	0.841613	0.81946	0.924003	-0.111469	0.124133	0.0912638	-0.144338
Slc12a7	0.619434	0.878991	0.68447	0.937994	-0.16189	0.113424	0.168682	-0.106633
Ppp1r1b	0.21521	0.831937	0.809388	0.926829	-0.588154	-0.201041	0.188575	-0.198538
Arntl	0.27184	0.994328	0.891563	0.919165	0.330856	0.009318	-0.107115	0.214423
Sod1	0.835605	0.843228	0.719886	0.999629	0.0585203	-0.101329	-0.154387	0.00546285
Afap1l2	0.902881	0.750368	0.986907	0.836887	-0.0397297	0.125186	0.00940637	-0.155509
Sh3bgrl	0.761508	0.653236	0.688327	0.926829	-0.152822	0.269201	0.266621	-0.155402
Cyp2e1	0.948858	0.2506	0.664513	0.821803	-0.0491363	-1.01815	-0.563293	0.405716
Parn	0.903562	0.431985	0.639084	0.86919	0.0297953	-0.254579	-0.15122	0.133154
Psmd7	0.657847	0.8966	0.95201	0.807398	0.131001	-0.0841642	0.0334891	0.248654
Heatr3	0.681016	0.909348	0.662221	0.813795	0.0996539	0.0621217	0.160734	0.198267
Dnaja4	0.112635	0.674774	0.535542	0.876772	-0.383075	-0.598511	0.22714	0.442577
Prkaca	0.0272389	0.620381	0.921893	0.7748	-0.686594	-0.373625	-0.0639281	-0.376897
Sdad1	0.81539	0.574051	0.970881	0.653798	0.0643265	-0.232017	0.018724	0.315068
Soat1	0.0207452	0.111878	0.172827	0.137059	1.41624	0.929427	0.717827	1.20464
Trappc6a	0.995307	0.605304	0.60902	0.926829	-0.00371363	-0.630371	-0.355864	0.270793
Serpinh1	0.00229045	0.00612997	0.794219	0.760006	1.75742	1.66922	0.193292	0.2815
Thy1	0.356313	0.140829	0.974254	0.407407	0.274204	0.867267	-0.0184839	-0.611547
Stat1	0.654783	0.767079	0.95201	0.801759	-0.124016	0.179566	0.0281297	-0.275452
Pbk	0.908337	0.292254	0.700707	0.734725	-0.0535297	0.542106	0.185317	-0.410319
C1qa	0.736462	0.221524	0.32626	0.511164	-0.16314	1.45217	0.558677	-1.05663
Prkab2	0.424827	0.973333	0.750048	0.843258	-0.164145	-0.0458518	-0.180442	-0.298736
Srpx	0.0727736	0.182556	0.607177	0.0110852	0.672567	-0.645094	0.233536	1.5512
Cbx5	0.0507022	0.863666	0.807004	0.714502	-0.546431	-0.109398	0.0850045	-0.352029
Mtdh	0.0668561	0.971686	0.638519	0.773071	-0.457819	-0.0277902	0.179211	-0.250818
Fap	0.0667766	0.517917	0.811587	0.999629	0.744261	0.530922	-0.214914	-0.00157515
Tomm40l	0.941999	0.372366	0.688327	0.842549	0.0315116	0.618859	0.307727	-0.279621
Snx6	0.393117	0.445607	0.880644	0.998738	0.174143	0.253703	0.0736959	-0.00586414
Cyp2s1	0.0763061	0.308856	0.722567	0.924003	-1.01867	-0.759467	0.427444	0.168242
Ahr	0.757142	0.980797	0.912091	0.857848	-0.120332	0.0257235	-0.10044	-0.246496
Slc6a9	0.745191	0.802356	0.60511	0.822737	0.0780305	0.115886	0.212085	0.174229
Agps	0.628973	0.507521	0.617902	0.754247	-0.113861	0.39176	0.157046	-0.348575
Nab1	0.753493	0.73035	0.675792	0.924003	-0.130816	0.343369	0.266822	-0.207363
Awat1	0.202745	0.976817	0.827006	0.179125	0.740684	-0.0361445	0.281504	1.05833
Rnf213	0.6869	0.69428	0.932848	0.967761	-0.192285	-0.353503	-0.0639298	0.0972886
Lum	0.978569	0.219749	0.979239	0.347051	0.00998588	-0.451895	0.0154593	0.477341
Cr1l	0.0532597	0.637177	0.932427	0.835757	-0.448613	-0.216632	0.0437526	-0.188228
Magi1	0.584658	0.58895	0.991347	0.949289	-0.194916	-0.259185	0.0081759	0.0724448
Stxbp6	0.57672	0.727866	0.671778	0.592317	0.218964	0.316569	-0.440859	-0.538465
Arhgef7	0.755141	0.779538	0.840311	0.890491	-0.0766882	0.137775	0.0686699	-0.145794
Fth1	0.20581	0.916852	0.207569	0.955186	-0.443985	-0.10582	0.443039	0.104875
Sh3glb1	0.41409	0.389491	0.809793	0.997639	0.250682	0.319454	0.0817208	0.012949
Ranbp10	0.900728	0.857999	0.977177	0.959697	0.0404464	0.123183	0.012695	-0.0700415
Comp	0.594478	0.471353	0.877194	0.978893	-0.508654	-0.811418	-0.382288	-0.0795244
Nudt12	0.36252	0.877953	0.978364	0.907342	0.374233	0.180981	0.0281849	0.221437
Pla2g7	0.114867	0.942241	0.231145	0.935942	0.49993	-0.0722068	-0.446198	0.125938
Fcgrt	0.54588	0.544018	0.943775	0.978893	0.291964	0.29099	0.0499556	0.0509295
Srpx2	0.611305	0.661656	0.879869	0.407407	0.144803	-0.318631	0.136802	0.600236
Isg15	0.252958	0.388557	0.649142	0.50496	-0.952277	0.613675	0.775798	-0.790154
Fads1	0.110254	0.133668	0.945887	0.924692	0.796091	0.845113	-0.0873864	-0.136408
Mpi	0.539554	0.994328	0.95201	0.86634	0.187818	-0.0086024	0.0431053	0.239525
Slc6a14	0.0208944	0.106524	0.689502	0.594217	-0.736357	-0.59944	-0.187862	-0.324779
Npc2	0.261198	0.942241	0.930904	0.862776	0.341316	0.0847246	0.0450219	0.301614
Epha2	0.145927	0.0783603	0.424082	0.935925	-0.395848	-0.60258	-0.283711	-0.0769785
Sap18	0.399659	0.744607	0.923596	0.972829	0.222899	0.242396	0.0706778	0.0511803
Sp1	0.0309143	0.960469	0.450067	0.884783	-0.564871	0.095388	0.306864	-0.353395
Rab27a	0.224284	0.162408	0.207569	0.47148	0.285745	-0.869872	-0.649602	0.506015
Txnrd1	0.875535	0.332054	0.752479	0.798866	-0.0388682	-0.380008	-0.17133	0.16981
Rassf5	0.45727	0.320609	0.7324	0.986134	-0.254891	-0.470412	-0.236788	-0.0212669
Tor1aip2	0.985527	0.764321	0.891563	0.900512	-0.00485962	-0.293192	-0.0684998	0.219833
Pon3	0.903937	0.832176	0.970849	0.879166	-0.035203	0.194515	-0.0178769	-0.247595
Gdpd2	0.901283	0.48395	0.795778	0.343299	0.0448139	-0.402391	0.175102	0.622307
Uprt	0.455671	0.814884	0.979178	0.936047	0.241421	0.131105	-0.0166264	0.0936893
Dctn6	0.825268	0.812464	0.930628	0.905317	-0.0919338	0.11299	0.0641813	-0.140742
Col5a2	0.00484867	0.0325212	0.549415	0.132481	1.31658	1.0123	0.385111	0.68939
Csrp2	0.416255	0.366793	0.35992	0.771829	0.319015	-0.668777	-0.55477	0.433021
Krt81	0.457043	0.654525	0.936145	0.844757	0.94631	0.213545	-0.250843	0.481923
Ubfd1	0.111128	0.269762	0.425026	0.844757	0.398862	0.449446	0.239674	0.189089
Rarg	0.838204	0.855492	0.681839	0.927953	-0.0527794	-0.160229	-0.230461	-0.123011
Coro2b	0.657062	0.600372	0.735124	0.972829	0.188329	0.371091	0.241904	0.0591417
Cd14	0.746631	0.868087	0.59079	0.908659	0.11005	0.205202	0.326642	0.23149
Prrc1	0.13358	0.238399	0.484115	0.8365	0.43706	0.566677	0.338165	0.208548
Ncaph	0.145576	0.884482	0.863201	0.903956	-0.394899	-0.121735	0.113516	-0.159647
Agfg2	0.82017	0.941662	0.855181	0.933629	-0.0966706	-0.108006	-0.179997	-0.168662
Pllp	0.352615	0.876746	0.128893	0.96232	0.471476	-0.288668	-0.929851	-0.169707
Tmed2	0.54541	0.93504	0.948318	0.86205	0.205224	0.0531637	0.0448583	0.196918
Orm1	0.841439	0.882436	0.640663	0.787787	0.283483	-0.141509	0.502011	0.927002
Fen1	0.168985	0.458484	0.983215	0.927953	-0.419087	-0.326921	-0.0119926	-0.104159
Amfr	0.987058	0.920571	0.993941	0.946366	0.00496157	-0.0871553	-0.00434035	0.0877765
App	0.658996	0.896791	0.667536	0.881594	-0.0863568	-0.0856182	-0.155749	-0.156488
Sgpp1	0.806091	0.367722	0.663705	0.897421	-0.083908	-0.467725	-0.226426	0.157391
Tmem59	0.755141	0.949473	0.680178	0.923164	0.287742	0.0939936	-0.491902	-0.298153
Mgst1	0.738162	0.822182	0.645164	0.880765	0.164735	0.159756	-0.264279	-0.259301
Rraga	0.884865	0.878252	0.953417	0.926829	-0.0488554	0.0833308	0.0251117	-0.107075
Abcc3	0.899955	0.979392	0.962784	0.992729	-0.0563505	-0.0424563	0.0425987	0.0287045
Inpp5d	0.39202	0.764811	0.889903	0.734725	-0.375303	0.249686	0.0873945	-0.537594
Galnt6	0.426958	0.813722	0.923759	0.892652	-0.384117	-0.221525	-0.101591	-0.264183
Neu2	0.481993	0.271556	0.92166	0.714502	-0.295024	-0.975449	-0.109002	0.571423
S100a9	0.836665	0.672638	0.288819	0.363822	0.303589	-1.947	2.2678	4.5184
Pctp	0.369498	0.2818	0.172528	0.656934	0.294962	0.495724	0.601957	0.401196
Sema4c	0.306747	0.499138	0.362478	0.877831	-0.257406	0.226141	0.344777	-0.13877
C5ar1	0.0263833	0.371637	0.250595	0.652712	-0.844932	-0.721406	0.691475	0.567948
Ly6d	0.695642	0.915638	0.913513	0.927953	0.107857	-0.10128	-0.07557	0.133567
Sumo1	0.853039	0.606951	0.58664	0.902404	-0.0540019	-0.195681	-0.249433	-0.107754
Calcrl	0.16477	0.971872	0.32651	0.926829	0.440839	0.064577	-0.608214	-0.231952
Pla2g2f	0.163217	0.939105	0.359374	0.902008	0.780365	-0.0925008	-0.601266	0.271599
Twsg1	0.917805	0.578656	0.805489	0.89564	0.0586974	0.507816	0.16888	-0.280239
Procr	0.90772	0.323829	0.881939	0.734847	0.0834299	-0.634762	-0.114742	0.60345
B2m	0.388776	0.323829	0.872167	0.93266	0.296767	0.548956	0.144022	-0.108167
Plcxd1	0.906642	0.764374	0.824174	0.978893	-0.0967567	-0.563395	-0.360302	0.106337

## Sheet: 27ProteinsWithSignificance
Comparison paw skin proteome with top candidates of skin diseases (https://biohub.skinsciencefoundation.org/)												q value ≤ 0.05
		q value				Log2FC
SkinDisease	Gene Name	Skin_Fe4w/Fe14w	Skin_Ma4w/Ma14w	Skin_Ma4w/Fe4w	Skin_Ma14w/Fe14w	Skin_Fe4w/Fe14w	Skin_Ma4w/Ma14w	Skin_Ma4w/Fe4w	Skin_Ma14w/Fe14w
Alopecia areata	Tgfbi	0.0219268	0.22472	0.900029	0.844757	-0.64051	-0.54855	-0.0781676	-0.170128
Acne	C5ar1	0.0263833	0.371637	0.250595	0.652712	-0.844932	-0.721406	0.691475	0.567948
Acne	Vcan	0.0198211	0.886138	0.309564	0.582123	-0.708036	0.0852631	0.431424	-0.361875
Atopic dermatitis	Col6a6	0.0250699	0.0164581	0.722357	0.813795	1.08584	1.26899	-0.141727	-0.324878
Atopic dermatitis	Krt16	0.00284028	0.470518	0.0404224	0.653798	-1.59533	-1.87873	1.47334	1.75673
Atopic dermatitis	Krt6a	0.0027647	0.341644	0.0459288	0.654675	-1.38001	-1.68698	0.914651	1.22162
Atopic dermatitis	Srpx	0.0727736	0.182556	0.607177	0.0110852	0.672567	-0.645094	0.233536	1.5512
Hidradenitis Suppurativa	Col5a1	0.0129636	0.0566058	0.347097	0.03586	1.33024	1.0018	0.750384	1.07882
Hidradenitis Suppurativa	Col5a2	0.00484867	0.0325212	0.549415	0.132481	1.31658	1.0123	0.385111	0.68939
Hidradenitis Suppurativa	Gnb1	0.0415117	0.654725	0.977177	0.563185	-0.525973	-0.202535	-0.0171073	-0.340545
Hidradenitis Suppurativa	Npl	0.0143785	0.654525	0.495932	0.22971	1.5698	0.218635	-0.622961	0.7282
Hidradenitis Suppurativa	Plod1	0.00601126	0.00612997	0.359374	0.895152	1.17683	1.44474	0.420983	0.153069
Hidradenitis Suppurativa	Pxdn	0.0235928	0.238399	0.410731	0.0759185	0.886248	0.423427	0.367646	0.830467
Hidradenitis Suppurativa	Serpinh1	0.00229045	0.00612997	0.794219	0.760006	1.75742	1.66922	0.193292	0.2815
Lichen Planus	Fgl2	0.0549133	0.0347717	0.927216	0.804842	0.773061	0.888318	-0.0902918	-0.205549
Lichen Planus	Prkaca	0.0272389	0.620381	0.921893	0.7748	-0.686594	-0.373625	-0.0639281	-0.376897
Lichen Planus	Serpinb5	0.0373546	0.518843	0.824174	0.89564	-0.452656	-0.252761	0.0815335	-0.118362
Psoriasis	Crabp2	0.0157691	0.0715055	0.281996	0.590636	-0.75567	-0.850539	-0.465231	-0.370363
Psoriasis	Pglyrp4	0.111018	0.832466	0.333327	0.00969697	-0.496584	0.131989	-0.610754	-1.23933
Psoriasis	Slc5a1	0.0182793	0.193483	0.894058	0.762916	-0.975464	-0.73105	-0.090223	-0.334637
Psoriasis	Slc6a14	0.0208944	0.106524	0.689502	0.594217	-0.736357	-0.59944	-0.187862	-0.324779
Psoriasis	Tgm3	0.0339789	0.528898	0.359374	0.901692	-0.594447	-0.485669	0.31213	0.203351
Rosacea	Fa2h	0.0309143	0.239497	0.365543	0.0929197	1.10546	0.606673	0.560743	1.05953
Rosacea	Pxmp4	0.0105288	0.661773	0.388819	0.956878	0.662827	0.229209	-0.377314	0.0563037
Rosacea	Soat1	0.0207452	0.111878	0.172827	0.137059	1.41624	0.929427	0.717827	1.20464
Vitiligo	Sdc4	0.014945	0.626759	0.910782	0.545711	-0.800801	-0.346157	-0.0865112	-0.541156
Vitiligo	Sp1	0.0309143	0.960469	0.450067	0.884783	-0.564871	0.095388	0.306864	-0.353395

## Sheet: 11_AutoImmuneDiseasesRelated
Comparison paw skin proteome with top candidates of auto-immune skin diseases (https://biohub.skinsciencefoundation.org/)												q value ≤ 0.05
		q value				Log2FC						Higher expression at 4 weeks
SkinDisease	Gene Name	Skin_Fe4w/Fe14w	Skin_Ma4w/Ma14w	Skin_Ma4w/Fe4w	Skin_Ma14w/Fe14w	Skin_Fe4w/Fe14w	Skin_Ma4w/Ma14w	Skin_Ma4w/Fe4w	Skin_Ma14w/Fe14w			Lower expression at 4 weeks
Alopecia areata	Tgfbi	0.0219268	0.22472	0.900029	0.844757	-0.64051	-0.54855	-0.0781676	-0.170128
Lichen Planus	Fgl2	0.0549133	0.0347717	0.927216	0.804842	0.773061	0.888318	-0.0902918	-0.205549
Lichen Planus	Prkaca	0.0272389	0.620381	0.921893	0.7748	-0.686594	-0.373625	-0.0639281	-0.376897
Lichen Planus	Serpinb5	0.0373546	0.518843	0.824174	0.89564	-0.452656	-0.252761	0.0815335	-0.118362
Psoriasis	Crabp2	0.0157691	0.0715055	0.281996	0.590636	-0.75567	-0.850539	-0.465231	-0.370363
Psoriasis	Pglyrp4	0.111018	0.832466	0.333327	0.00969697	-0.496584	0.131989	-0.610754	-1.23933
Psoriasis	Slc5a1	0.0182793	0.193483	0.894058	0.762916	-0.975464	-0.73105	-0.090223	-0.334637
Psoriasis	Slc6a14	0.0208944	0.106524	0.689502	0.594217	-0.736357	-0.59944	-0.187862	-0.324779
Psoriasis	Tgm3	0.0339789	0.528898	0.359374	0.901692	-0.594447	-0.485669	0.31213	0.203351
Vitiligo	Sdc4	0.014945	0.626759	0.910782	0.545711	-0.800801	-0.346157	-0.0865112	-0.541156
Vitiligo	Sp1	0.0309143	0.960469	0.450067	0.884783	-0.564871	0.095388	0.306864	-0.353395
