# Supplementary material for: Deep proteome profiling reveals signatures of age and sex differences in paw skin and sciatic nerve of naïve mice
Source: eLife. 2022 Nov 30;11:e81431. doi: 10.7554/eLife.81431 (PMC9711526; doi:10.7554/eLife.81431)
Supplement: Figure 6—source data 2. [file elife-81431-fig6-data2.xlsx]

## Sheet: SkinDiseasesRelated
Gene Name	Fuzzy C-means cluster
Abi1	1
Arhgef7	1
Arpc5	1
Atp6v1c1	1
Cd180	1
Chm	1
Crip2	1
Dctn6	1
Eif2ak2	1
F12	1
Inpp5d	1
Iqgap1	1
Kif5b	1
Lsm14a	1
Macf1	1
Mtdh	1
Myo1g	1
Nab1	1
Pdzk1ip1	1
Pltp	1
Prdx6	1
Rraga	1
Sema4c	1
Serpina9	1
Sf3b1	1
Slc7a1	1
Smc3	1
Son	1
Sp1	1
Stat1	1
Sun1	1
Thbs1	1
Tpm4	1
Vcan	1
Zdhhc13	1
Znfx1	1
Aadac	2
Aco1	2
Acsl5	2
Akt1	2
Alad	2
Aldh1a1	2
Arntl	2
B2m	2
Carhsp1	2
Cnp	2
Col6a6	2
Ddx58	2
Fap	2
Fcgrt	2
Fgfr1op2	2
Gstm5	2
Hspa12b	2
Idh1	2
Krt81	2
Ly6d	2
Mef2d	2
Npc2	2
Npl	2
Nt5e	2
Pex13	2
Pex5	2
Pla2g2f	2
Pla2g7	2
Ppp1cc	2
Prkcb	2
Psat1	2
Psmd7	2
Ptpn12	2
Pxmp4	2
Serpinh1	2
Stxbp6	2
Awat1	3
Cd14	3
Chmp4b	3
Col5a1	3
Col5a2	3
Echdc1	3
Egfr	3
Fa2h	3
Heatr3	3
Ipo7	3
Mapk1	3
Ncor1	3
Nudt12	3
Pcm1	3
Pctp	3
Pdcd5	3
Plin2	3
Prrc1	3
Ptges	3
Pxdn	3
Sap18	3
Sh3bgrl	3
Slc6a9	3
Snx3	3
Snx6	3
Soat1	3
Stau1	3
Steap4	3
Tmed2	3
Twsg1	3
Ubfd1	3
Uprt	3
Acadvl	4
Acat2	4
Actn1	4
Ap1s1	4
Aqp3	4
Clec10a	4
Dnaja4	4
Dtx3l	4
Dvl1	4
Fbln1	4
Gda	4
Gdpd2	4
Hk2	4
Hr	4
Krt77	4
Lcn2	4
Lum	4
Mpi	4
Ncf2	4
Neu2	4
Orm1	4
Pdha1	4
Pip5k1a	4
Procr	4
Rac2	4
Rnf213	4
S100a9	4
Sdad1	4
Slc12a7	4
Srpx	4
Srpx2	4
Syne1	4
Tgm2	4
Tnc	4
Tuba1c	4
Xdh	4
Acot9	5
Actb	5
Aph1a	5
Bri3bp	5
C5ar1	5
Cdk4	5
Cltc	5
Cyp2s1	5
Dnase1l2	5
Dock2	5
Fchsd1	5
Flnb	5
Fth1	5
Inpp4a	5
Inpp5b	5
Ints5	5
Krt16	5
Krt6a	5
Krt79	5
Lamc3	5
Msn	5
Ncl	5
Nsa2	5
Osbp	5
Ppp1r1b	5
Psma3	5
Rad21	5
Ranbp10	5
Rcn2	5
Rsl1d1	5
Sugt1	5
Syf2	5
Tagln2	5
Tgm3	5
Tk1	5
Tm9sf2	5
Tubgcp3	5
Agfg2	6
Alox12b	6
App	6
Calcrl	6
Cd200	6
Comp	6
Csrp2	6
Cyp2e1	6
Dpp4	6
Fdps	6
Fmo1	6
Gdpd3	6
Gpt2	6
Hspa12a	6
Lrp4	6
Magi1	6
Mme	6
Mst1r	6
Parn	6
Pgrmc1	6
Pllp	6
Prkab2	6
Prss27	6
Qdpr	6
Rab27a	6
Rassf5	6
Rgn	6
Sdr9c7	6
Sgpp1	6
Slc16a1	6
Smpd1	6
Sumo1	6
Tmprss4	6
Trappc6a	6
Txnrd1	6
Xpc	6
Abcc1	7
Arpc2	7
Atp6v0a1	7
Atp7a	7
Casp1	7
Cbx5	7
Cr1l	7
Crabp2	7
Csde1	7
Ddx6	7
Epha2	7
Fen1	7
Gabarapl2	7
Galnt6	7
Gja1	7
Gnb1	7
Hmgcs1	7
Huwe1	7
Itm2b	7
Lrrc1	7
Mapre3	7
Ncaph	7
Ncbp1	7
Plekhg5	7
Prkaca	7
Rab7a	7
Samd9l	7
Sdc4	7
Serpinb5	7
Sh3pxd2a	7
Slc15a1	7
Slc5a1	7
Slc6a14	7
Slc7a5	7
Tgfbi	7
Tgm1	7
Tmprss11d	7
Tmprss11e	7
Ttc22	7
Txndc9	7
Usp7	7
Xrcc5	7
Agps	8
C1qa	8
Col15a1	8
Coro2b	8
Cyp27a1	8
Dlx3	8
Dnm1	8
Drap1	8
Edf1	8
Elf1	8
Fads1	8
Fgl2	8
Fus	8
Gatm	8
Gclm	8
Gfpt2	8
Glg1	8
Hnrnpm	8
Hook3	8
Ltbp4	8
Map6	8
Mbd2	8
Pbk	8
Plod1	8
Pten	8
Rock1	8
Sh3glb1	8
Tax1bp1	8
Thy1	8
Tmf1	8
Tmtc3	8
Tomm40l	8
Abcc3	9
Acad8	9
Acadl	9
Acsbg1	9
Acsl1	9
Acyp1	9
Afap1l2	9
Ahr	9
Alox15	9
Amfr	9
Atp6v1c2	9
Bcat2	9
Birc6	9
Ca2	9
Chmp5	9
Cul1	9
Cyp39a1	9
Ddx42	9
Eef2k	9
Fbp1	9
Glo1	9
Ifih1	9
Isg15	9
Mbnl1	9
Mgst1	9
Nceh1	9
Pglyrp4	9
Plcxd1	9
Pon3	9
Ptpn6	9
Rai14	9
Rapgefl1	9
Rarg	9
Slc30a5	9
Sod1	9
Stat2	9
Tf	9
Tmem59	9
Tmem65	9
Top2b	9
Tor1aip2	9
Usp34	9

## Sheet: PainRelated
Gene Name	Fuzzy C-means cluster
Lrp1	1
Bbs1	1
Thbs4	1
Dbh	1
Ret	1
Snx8	1
Pirt	1
Stat6	1
Fstl1	1
Gfra2	1
Hcn1	1
Rhbdf2	1
Nfkb1	1
Cacna2d2	1
Calca	1
Nfkbia	1
Yy1	1
Tf	2
Ptges	2
Serpina6	2
Trpv1	2
Yap1	2
Ptpn6	2
F2	2
Spock2	2
Nnmt	2
Slc6a1	2
Il10rb	2
Htra1	2
Grk5	2
Atf7	2
Shc1	3
Kif1a	3
Nt5e	3
Stk39	3
Gfap	3
Alox5	3
Nrp1	3
Fkbp5	3
Abcc4	3
Gla	3
Il6st	3
Pip5k1a	3
Nos3	3
Ppp1r9b	3
Numb	3
Ptgs1	3
Sphk2	3
Maoa	3
Lpar1	3
P2rx4	3
Grk6	3
Cd38	3
Kcna1	3
Trpv2	3
Scn9a	3
Prnp	3
Cacna2d3	3
Cd14	3
S1pr3	3
Stx1a	3
Prkar1b	3
Sfrp1	3
C5ar1	3
Aqp1	3
Polr1c	4
Lyn	4
Spon1	4
Lxn	4
Prkaa2	4
Cp	4
Hmox2	4
Enpp1	4
Cct5	4
Sdk1	4
Gpd2	4
Cacna2d1	4
P2rx7	4
Prkce	4
Dlg4	4
Dnaja3	4
Hint1	4
Txnrd2	4
Mif	4
Dpp4	4
Cdk5	4
Mapk14	4
Map2k3	4
Adam11	4
Timp3	4
Casp1	4
Mapk10	4
Mapk8	4
Pon1	4
Camk2a	4
Plp1	4
Retn	4
Nptx1	4
Slc12a6	4
Ctss	4
Mapk1	5
Mapk3	5
Mtr	5
Itpr1	5
Mapt	5
Ephx2	5
Actn4	5
Snap25	5
Anxa2	5
L1cam	5
Patj	5
Wwp2	5
Ica1	5
Dync1i1	5
Ctnna3	5
Por	5
Dlg2	5
S100b	5
Fyn	5
Prkg1	5
Crip2	5
Nr3c1	5
H2-Ab1	5
P2ry2	5
Srr	5
B2m	5
S100a10	5
Syn2	5
Mapk9	5
Csnk1d	5
Map2k1	5
Efnb1	6
Mthfd1	6
Rnf213	6
Cfdp1	6
Nmt1	6
Nf1	6
Tfrc	6
Faah	6
Col4a1	6
Dnmt1	6
Elac2	6
Mgll	6
Zeb2	6
Il16	6
Mme	6
Arvcf	6
Aco1	6
Sparc	6
Sptlc1	6
Comt	6
Sptlc2	6
Enpp2	6
Mtdh	6
Sigmar1	6
Anapc4	6
Casp6	6
Nap1l1	6
Tmem165	6
Slc12a2	7
Prkcd	7
Specc1l	7
Lama4	7
Cbr3	7
Rabggta	7
Anxa1	7
Lgals1	7
Icam1	7
Atp1a2	7
Prkcb	7
Prkca	7
Prx	7
Syne1	7
Npepps	7
Pick1	7
Plcb1	7
Plcb3	7
Abcb1a	7
Clic5	7
Pip5k1c	7
Calb1	7
Plcl1	7
Ecm1	7
Svep1	7
Sod2	7
Ace2	7
Gnas	7
Rsu1	7
Gnao1	7
Gnaq	7
Maob	7
Rab7a	7
Nedd4l	7
Grn	7
Gnaz	7
Uchl1	7
Itgb5	7
Spp1	7
Slc2a1	7
Cacnb3	7
Csk	7
Ctsb	7
Abat	7
Faf1	7
Tlr3	7
P2ry12	7
Stard13	8
Ace	8
Atl1	8
Ctnna2	8
Iqgap1	8
Scn10a	8
Serpina3n	8
Il1rap	8
Th	8
Msh2	8
Lyst	8
Rabgap1l	8
Fgf13	8
Slc6a2	8
Smg6	8
Gnb3	8
Ncam1	9
Faf2	9
Arrb2	9
Ngfr	9
Mpdz	9
Dmd	9
Stag1	9
Ache	9
Acap2	9
Rnf123	9
Wnk1	9
Fmr1	9
Mthfr	9
Col5a1	9
Pcsk2	9
Fndc3b	9
Taok3	9
Hdac4	9
Apoe	9
Ncor2	9
Insr	9
Myd88	9
Calcrl	9
