# Supplementary material for: Deep proteome profiling reveals signatures of age and sex differences in paw skin and sciatic nerve of naïve mice
Source: eLife. 2022 Nov 30;11:e81431. doi: 10.7554/eLife.81431 (PMC9711526; doi:10.7554/eLife.81431)
Supplement: Figure 6—source data 3. [file elife-81431-fig6-data3.xlsx]

## Sheet: HF-Psoriasis
Comparison DEGs of hand-foot psoriasis with skin data ( DOI:10.1038/s41598-018-29472-w)										Proteins with age- and/or sex-dependent significances
	q value				Log2FC					q value ≤ 0.05
Gene Name	Skin_Fe4w/Fe14w	Skin_Ma4w/Ma14w	Skin_Ma4w/Fe4w	Skin_Ma14w/Fe14w	Skin_Fe4w/Fe14w	Skin_Ma4w/Ma14w	Skin_Ma4w/Fe4w	Skin_Ma14w/Fe14w
Mapk3	0.511988	0.9817	0.982046	0.885671	-0.113037	0.0131622	0.00797637	-0.118223
Psmd11	0.371811	0.878139	0.886877	0.970761	-0.156788	-0.0680561	0.0583351	-0.030397
Aoc3	0.646301	0.304215	0.365543	0.944629	-0.213815	-0.626851	-0.524107	-0.11107
Nol7	0.494386	0.994328	0.870245	0.857848	-0.191079	-0.00936703	-0.135336	-0.317048
Pnp	0.487497	0.741231	0.970881	0.999629	-0.15842	-0.145726	0.0167039	0.0040107
Pgm2	0.760988	0.668651	0.974254	0.754247	-0.0830387	0.21751	0.0170771	-0.283471
Lcp1	0.517744	0.97983	0.997248	0.88411	-0.251865	0.0326467	-0.00250387	-0.287016
Acaca	0.981718	0.652189	0.538693	0.98599	0.00546595	-0.161676	-0.183383	-0.0162415
Serpinf1	0.0031636	0.0361262	0.749329	0.352631	1.38428	1.13654	0.252841	0.500577
Itih5	0.585964	0.926981	0.489858	0.930645	0.102517	-0.0647297	-0.257832	-0.0905854
Srm	0.207399	0.796265	0.970881	0.820624	0.260764	0.114658	0.0186377	0.164743
Atp6v1d	0.265078	0.966476	0.947872	0.835757	-0.231648	-0.0274471	0.0372028	-0.166998
Pgm5	0.786373	0.323829	0.769537	0.563806	0.118611	-0.789936	-0.232235	0.676313
Oxct1	0.831712	0.962895	0.944573	0.993204	-0.0452014	-0.0262837	0.0296988	0.0107811
Pa2g4	0.0867956	0.269762	0.950008	0.970788	-0.41005	-0.409802	0.034551	0.0343028
Stxbp1	0.938715	0.843228	0.894678	0.926829	-0.0185348	0.179853	0.0530467	-0.145341
Ttc39b	0.210824	0.332771	0.392659	0.687244	-0.304441	-0.351194	0.257558	0.304311
Krt19	0.606667	0.638409	0.95201	0.737484	-0.333431	1.49797	0.101573	-1.72983
Olfml3	0.000800978	0.302009	0.983098	0.00969697	1.54101	0.444876	0.0125916	1.10873
Sdr9c7	0.46224	0.303113	0.544376	0.999629	-0.272409	-0.752746	-0.473309	0.00702921
Gltp	0.523952	0.719761	0.941427	0.978893	0.482235	0.352476	-0.0396358	0.090123
Sqle	0.763741	0.877104	0.805489	0.864842	0.092333	0.108695	-0.165286	-0.181648
Hspa12b	0.0697172	0.661773	0.360137	0.983064	0.592143	0.263028	-0.361135	-0.0320207
Palm	0.755949	0.528898	0.953644	0.770654	0.0652423	0.464619	0.0291418	-0.370234
Chmp4c	0.145927	0.654525	0.755497	0.694545	-0.369098	-0.227658	-0.175467	-0.316906
Hk2	0.340787	0.547464	0.844604	0.789919	-0.174004	-0.484245	0.0798235	0.390065
Lamb2	0.878027	0.40533	0.959229	0.514524	0.0387194	-0.30487	0.0205943	0.364184
Acsbg1	0.685593	0.813108	0.266078	0.129513	-0.118314	-0.102455	-0.550149	-0.566007
Psmg1	0.991484	0.966052	0.772616	0.924003	0.00281684	-0.0323382	-0.138835	-0.10368
Mccc2	0.881751	0.763049	0.604789	0.998973	0.0546912	-0.144446	-0.206622	-0.00748523
Syne3	0.920341	0.295433	0.939446	0.582123	0.0275725	0.437053	0.0363252	-0.373155
Psmd1	0.172171	0.833489	0.907095	0.926829	-0.228947	-0.10043	0.0447723	-0.0837438
Adh7	0.292086	0.332803	0.781675	0.692875	-0.228295	-0.416986	0.12052	0.30921
Myh14	0.100352	0.924042	0.861841	0.532573	-0.36648	0.0535475	0.102577	-0.317451
Sfn	0.0849598	0.447497	0.820811	0.954554	-0.494048	-0.398027	0.159693	0.0636717
Slc25a5	0.259778	0.621457	0.883807	0.943514	-0.228126	-0.216781	0.0739141	0.0625693
Ttc38	0.846347	0.949345	0.762784	0.754247	-0.0391911	0.0330766	-0.113953	-0.18622
Paics	0.944414	0.93686	0.992621	0.978272	-0.0194759	-0.0591744	-0.0047645	0.0349341
Ctsf	0.890519	0.95913	0.801893	0.86634	-0.043209	-0.0420409	-0.165627	-0.166795
Acacb	0.104979	0.935967	0.790543	0.124257	0.780339	-0.0487495	0.182151	1.01124
Dkc1	0.694778	0.330744	0.882275	0.888608	-0.106983	-0.301302	-0.061406	0.132913
Fabp3	0.0434228	0.219059	0.346038	0.124257	1.32596	-1.6755	-1.24107	1.76039
Atg3	0.851342	0.791919	0.972643	0.949489	0.0469193	0.116949	0.0152834	-0.0547458
S100a16	0.158301	0.425964	0.982046	0.972829	0.48248	0.419744	-0.013111	0.0496249
Eef2k	0.969315	0.979392	0.383044	0.720066	0.0107284	0.0147227	-0.257212	-0.261207
Pitpnb	0.805116	0.869829	0.968331	0.989139	0.0602078	0.0944587	0.0171818	-0.0170691
Ifih1	0.277332	0.822182	0.882219	0.812451	-0.410223	-0.188762	-0.123143	-0.344605
Mmrn2	0.848045	0.948018	0.824174	0.941785	0.057195	0.042754	-0.0906383	-0.0761973
Serpinb8	0.913731	0.493327	0.707769	0.896405	-0.0314589	-0.390233	-0.2123	0.146474
Phldb1	0.110168	0.0347717	0.939446	0.311696	0.403724	0.891453	-0.0383212	-0.526051
Pdzk1ip1	0.273208	0.871646	0.663705	0.998973	-0.410652	-0.13622	0.264091	-0.0103418
Otud4	0.740109	0.908026	0.830114	0.969319	-0.0866713	0.0910253	0.127666	-0.0500309
Eif2s1	0.39977	0.813108	0.870245	0.983064	-0.167275	-0.117448	0.0706983	0.020872
Vit	0.0697172	0.587103	0.560741	0.832321	0.512278	0.471499	0.301135	0.341915
Gsdmc	0.051111	0.994328	0.803345	0.389054	-1.22451	-0.00697038	0.161431	-1.05611
Xdh	0.693015	0.597194	0.930973	0.913524	-0.0943885	-0.253665	-0.03538	0.123897
Sort1	0.223576	0.878252	0.94879	0.81498	-0.288751	-0.109357	-0.0462508	-0.225645
Cycs	0.334596	0.450396	0.388872	0.894432	0.401681	0.440314	0.280496	0.241863
Gdpd3	0.454239	0.914119	0.207569	0.941785	0.213644	-0.159785	-0.530239	-0.156809
Siglec1	0.425295	0.496969	0.894806	0.926829	-0.532162	-0.410801	-0.119336	-0.240697
Serpinb12	0.0276613	0.599519	0.0514078	0.765901	-0.692748	-0.46092	0.696335	0.464507
Aldh1a2	0.107367	0.458484	0.977177	0.864842	-0.53131	-0.373347	-0.0231909	-0.181153
Lama5	0.354477	0.490171	0.918873	0.896405	-0.161831	-0.347429	-0.0555214	0.130077
Naalad2	0.491367	0.891732	0.879869	0.863138	0.210085	-0.0962393	-0.122112	0.184213
Enpep	0.0942034	0.539263	0.95201	0.991252	-0.378321	-0.40113	-0.0425619	-0.0197534
Mtif2	0.728095	0.929733	0.930628	0.978893	-0.161517	-0.0429714	0.0815454	-0.0370002
Calml3	0.17373	0.570179	0.789734	0.904067	-0.724916	-0.350684	0.130111	-0.244121
Krt7	0.306751	0.158676	0.732713	0.124257	0.393368	1.38777	-0.331217	-1.32562
Krt6a	0.0027647	0.341644	0.0459288	0.654675	-1.38001	-1.68698	0.914651	1.22162
Susd2	0.866323	0.268083	0.0469581	0.970761	-0.0427598	-0.605144	-0.611555	-0.0491708
Fkbp10	0.00140385	0.00612997	0.570136	0.714502	2.16284	2.22437	0.444961	0.383437
Sephs2	0.262005	0.943932	0.522204	0.938712	-0.23209	-0.056219	0.260047	0.0841758
Ltbp4	0.254612	0.219117	0.982046	0.814543	0.333766	0.593774	0.0108697	-0.249138
Prx	0.210438	0.657316	0.538693	0.761538	0.448226	-0.411499	-0.358496	0.50123
Vdac2	0.872929	0.416477	0.899678	0.767386	-0.0364864	-0.303217	-0.0576405	0.20909
Me1	0.691512	0.783963	0.495932	0.970674	0.0933657	-0.163364	-0.208093	0.0486368
Tdp2	0.139936	0.66873	0.974254	0.835757	-0.662791	-0.369004	-0.0357417	-0.329529
Rcn2	0.272525	0.897527	0.894806	0.924707	-0.564713	-0.174213	0.170881	-0.219619
Dsg3	0.350935	0.759613	0.50727	0.787787	-0.196232	-0.196542	0.277768	0.278078
Gsdma	0.388034	0.40533	0.852596	0.873694	-0.213293	-0.561972	-0.120764	0.227915
Ptpre	0.544573	0.88908	0.859193	0.884783	-0.214477	0.0845969	0.122228	-0.176846
Slc30a1	0.590702	0.941662	0.35992	0.640442	-0.149222	-0.0449062	0.4241	0.319784
Tln2	0.273566	0.913723	0.900481	0.867587	-0.318437	-0.0652262	0.0732664	-0.179945
Rcn3	0.0434228	0.0571343	0.859193	0.879166	1.55322	1.50115	0.26344	0.315508
Atic	0.258341	0.813108	0.970881	0.900208	-0.194276	-0.107946	-0.015008	-0.101338
Pdcd10	0.595651	0.244102	0.803345	0.940056	0.236161	0.458955	0.113077	-0.109717
Dlx3	0.909146	0.332772	0.839693	0.799847	0.05473	0.529447	0.172057	-0.30266
Rnf20	0.965515	0.657316	0.955001	0.834567	-0.012318	0.240785	0.0271692	-0.225934
Idi1	0.421367	0.916544	0.812066	0.884783	0.202446	-0.0732398	-0.101084	0.174601
Dhx32	0.917682	0.551281	0.76105	0.870154	-0.0305508	0.23915	0.107934	-0.161767
Rad50	0.79457	0.972861	0.982046	0.936047	-0.0626582	0.0247052	0.0085777	-0.0787857
Plod1	0.00601126	0.00612997	0.359374	0.895152	1.17683	1.44474	0.420983	0.153069
Junb	0.531443	0.409366	0.675792	0.938897	0.224501	0.422235	0.288217	0.0904824
Clec3b	0.0232581	0.0347717	0.212951	0.734725	1.16003	1.38164	0.679514	0.457901
Pofut2	0.0500237	0.0871975	0.800755	0.937994	0.667347	0.920764	0.164021	-0.0893958
Akap12	0.280729	0.619268	0.705903	0.737484	0.269761	0.333759	-0.264125	-0.328123
Azgp1	0.110254	0.760814	0.207569	0.978893	-0.380853	0.209541	0.55262	-0.0377737
Pi16	0.0205619	0.790554	0.207569	0.0246512	-0.625916	-0.237347	-0.881633	-1.2702
Krt9	0.0147447	0.810012	0.882219	0.607753	-1.196	-0.354955	-0.094664	-0.935713
Hephl1	0.143753	0.786552	0.38099	0.925898	0.346372	-0.247791	-0.443093	0.15107
Phgdh	0.904996	0.891165	0.95201	0.880765	0.0283217	-0.0689281	0.0277594	0.125009
Ndufb9	0.0977444	0.963974	0.601305	0.881594	0.451313	-0.0663605	-0.227777	0.289896
Hal	0.114621	0.688544	0.00320192	0.063575	0.390746	-0.187422	-1.4277	-0.849534
Ola1	0.300581	0.877934	0.705903	0.991407	-0.191742	-0.0638879	0.116061	-0.0117935
Atp6v0d1	0.755949	0.995897	0.865536	0.997639	-0.0720764	0.00253761	0.0833735	0.00875949
Rragc	0.995227	0.720873	0.483476	0.967761	-0.00159261	-0.196752	-0.24561	-0.0504513
Syne1	0.47236	0.940349	0.623617	0.943234	-0.143502	-0.0485622	0.161839	0.0668993
Elovl7	0.903562	0.301777	0.859193	0.584328	0.0729682	-0.836849	-0.160329	0.749488
Thbs4	0.968516	0.998794	0.807004	0.926829	-0.0209215	0.00171976	0.199728	0.177087
Tmem79	0.182691	0.610876	0.999722	0.87079	-0.510185	-0.302925	0.000764681	-0.206495
Psme2	0.785889	0.955989	0.790543	0.979766	-0.122817	0.0318015	0.116006	-0.0386126
Arap2	0.625012	0.665794	0.617902	0.789919	-0.153591	-0.220357	0.224315	0.291082
Htatip2	0.376832	0.690485	0.803345	0.876772	-0.217663	-0.142107	-0.0771162	-0.152672
Ppp2r2a	0.0723826	0.676613	0.81418	0.948028	-0.355545	-0.204093	0.0851796	-0.0662723
Emilin2	0.0816345	0.935967	0.962141	0.223395	-0.727202	-0.048926	-0.0371345	-0.71541
Tns3	0.569604	0.943932	0.888843	0.928927	0.148166	-0.0698213	-0.091561	0.126427
Scara5	0.0276613	0.220326	0.918637	0.898241	0.704761	0.799228	-0.074088	-0.168554
Slc27a1	0.885197	0.801581	0.530059	0.640442	0.0659792	0.141139	-0.355797	-0.430957
Stam	0.531809	0.270224	0.684491	0.734485	0.115906	0.561861	0.142666	-0.303289
Ammecr1	0.944968	0.413734	0.943997	0.771063	-0.0284103	-0.379252	-0.055386	0.295456
Trex2	0.900266	0.404172	0.266078	0.86634	-0.0346993	-0.696229	-0.360781	0.300748
Krt15	0.177236	0.663664	0.522204	0.922527	0.427847	0.200082	-0.343756	-0.115991
Zbtb7a	0.225568	0.902668	0.654883	0.970761	-0.297375	-0.0643471	0.195723	-0.0373056
Sowahc	0.901349	0.694247	0.921181	0.835757	-0.0272651	0.184676	0.0713908	-0.14055
Yod1	0.827773	0.777506	0.972643	0.979766	-0.097331	-0.156961	-0.0225407	0.0370897
Osbpl5	0.954697	0.981514	0.409641	0.714502	-0.0169739	-0.0138184	-0.28334	-0.286496
Itsn2	0.289942	0.371637	0.335294	0.754247	-0.232111	0.296721	0.296016	-0.232816
Dhcr7	0.264307	0.622944	0.389853	0.711058	-0.28088	-0.23966	-0.298746	-0.339966
Aloxe3	0.786179	0.726212	0.70062	0.900208	-0.117988	-0.195953	-0.245772	-0.167807
Dbn1	0.525236	0.198762	0.900105	0.146704	-0.189303	0.835238	0.0675769	-0.956964
Metap1	0.227357	0.601764	0.688327	0.89564	-0.210023	-0.190061	0.126179	0.106217
Stab1	0.818402	0.988072	0.873275	0.831581	0.0759167	-0.010911	0.109575	0.196403
Sdr42e1	0.395581	0.707895	0.873235	0.4535	0.333676	-0.148696	0.0920089	0.574381
Ebna1bp2	0.556622	0.291547	0.95023	0.768151	-0.164276	-0.389971	0.0309985	0.256694
Shank3	0.538766	0.593132	0.484031	0.86919	0.217213	-0.473031	-0.343327	0.346917
Homer2	0.13358	0.920913	0.942947	0.269019	-0.535472	0.0586519	-0.0525612	-0.646685
Itga7	0.416255	0.622868	0.614954	0.820624	0.231693	-0.320568	-0.273618	0.278642
Ggct	0.330029	0.261521	0.0471424	0.937994	0.247098	-0.797576	-0.93249	0.112184
Kpna2	0.202659	0.450396	0.207569	0.852093	-0.304773	0.324585	0.444849	-0.184509
Psma5	0.348225	0.814884	0.967216	0.985889	-0.163808	-0.173673	0.0151116	0.0249767
Tgm1	0.254028	0.530788	0.872576	0.964221	-0.280846	-0.449149	-0.0882303	0.0800725
Fdft1	0.219112	0.938572	0.617902	0.999629	0.33002	-0.0683997	-0.403475	-0.00505508
Ckap2	0.825904	0.870338	0.889903	0.930645	-0.170152	0.226433	0.136968	-0.259617
Tmprss11d	0.0671376	0.494418	0.658793	0.967761	-0.802986	-0.397156	0.341544	-0.0642863
Bdh1	0.381164	0.978187	0.979239	0.896391	-0.161004	-0.0257715	-0.0127416	-0.147974
Kdm1b	0.061391	0.497991	0.922408	0.935925	-0.465763	-0.318384	0.0774479	-0.0699303
Ppid	0.580751	0.981072	0.956535	0.872382	-0.140056	-0.0132044	-0.0222903	-0.149142
Inmt	0.00294759	0.00127936	0.256612	0.00969697	-2.67193	-3.34336	1.23892	1.91035
Eif5b	0.222213	0.909348	0.604789	0.983064	-0.254014	-0.0502696	0.185945	-0.0178
Gfpt2	0.724441	0.545199	0.889903	0.720284	-0.118552	0.405573	0.107318	-0.416806
Hmgcr	0.464009	0.666875	0.954729	0.672919	0.289115	-0.221941	-0.0285465	0.482509
Pdcl3	0.979524	0.966052	0.983086	0.967761	-0.00625345	0.0286389	-0.00850635	-0.0433987
Chaf1b	0.70306	0.394594	0.824174	0.86515	-0.182406	-0.727543	-0.255585	0.289553
Psmd12	0.619434	0.957345	0.872576	0.948028	-0.0839574	0.0416732	0.0621401	-0.0634905
Slc29a1	0.905842	0.978187	0.863868	0.937619	0.0563593	0.0371529	-0.155239	-0.136033
Grpel1	0.60399	0.812464	0.625544	0.970674	0.26655	0.368809	0.225952	0.123693
Arpc5l	0.980482	0.632366	0.999722	0.886406	-0.0171956	-0.289806	0.000379318	0.27299
IL36RN	0.207399	0.627109	0.680178	0.91545	-0.271844	-0.199152	0.170631	0.0979393
H6pd	0.675228	0.960469	0.855181	0.938777	0.143405	0.0460753	-0.177147	-0.079817
Pfkfb2	0.919257	0.832176	0.509771	0.856729	0.0288841	0.0989683	0.233428	0.163344
Cyp4b1	0.217115	0.9817	0.362084	0.972829	-0.361797	-0.028971	0.398748	0.0659217
Scrn3	0.653337	0.953222	0.932126	0.967761	-0.164741	-0.0426253	0.0669825	-0.0551329
Bpifc	0.556622	0.912811	0.762416	0.789919	-0.259388	-0.0767861	-0.175054	-0.357656
Smc2	0.36746	0.899224	0.855933	0.967761	-0.196037	-0.074551	0.0757853	-0.0457007
Krt79	0.492026	0.318376	0.872576	0.731949	-0.218215	-0.432652	0.107333	0.321771
Myo6	0.644094	0.611644	0.81816	0.967559	-0.120908	-0.170557	-0.0938596	-0.0442103
Vsig10l	0.995227	0.673837	0.865244	0.834484	0.00345721	-0.202372	0.118227	0.324057
Gpatch4	0.644094	0.754262	0.930628	0.907727	-0.309125	-0.395621	0.172934	0.25943
Otub2	0.932361	0.62948	0.863092	0.640442	-0.0380723	-0.260267	0.16877	0.390964
Inpp5a	0.527763	0.960469	0.939446	0.921837	0.156388	0.0497192	0.037966	0.144635
Lypla1	0.945871	0.857266	0.956224	0.926829	0.0495596	-0.130459	0.0263442	0.206363
Ddx1	0.987058	0.929733	0.752479	0.941785	-0.00372018	0.04177	0.101839	0.0563488
Plekhg5	0.535343	0.32374	0.947798	0.941785	-0.238589	-0.377028	-0.0544879	0.0839512
Hexa	0.801246	0.701451	0.861841	0.85927	-0.0954565	0.309173	0.12027	-0.284359
Cyp2w1	0.556622	0.764811	0.876088	0.972829	0.365115	0.283327	-0.16433	-0.0825424
P3h3	0.00135829	0.0128721	0.750827	0.546255	1.98164	1.75162	0.264337	0.49435
Lad1	0.0194459	0.329794	0.496413	0.969926	-0.851851	-0.478758	0.320902	-0.0521911
Pgam1	0.209519	0.91432	0.745028	0.813795	-0.453021	0.112243	0.212481	-0.352783
Islr	0.0444261	0.781227	0.692242	0.93266	0.765403	0.299511	-0.306008	0.159885
Cct6a	0.303634	0.784607	0.776089	0.970724	-0.175201	-0.114087	0.0937517	0.0326371
Crat	0.0162532	0.672638	0.302023	0.508427	0.652508	-0.245142	-0.427198	0.470453
Prmt3	0.717929	0.918087	0.825918	0.979215	-0.107841	-0.061004	0.0798842	0.0330474
Colec12	0.42474	0.953811	0.936145	0.876772	0.219702	-0.0626247	-0.0537406	0.228586
Epn3	0.798502	0.791313	0.970881	0.8005	0.10804	-0.0982507	0.0272258	0.233516
Guf1	0.862334	0.672476	0.837785	0.89564	0.0725843	-0.223286	-0.117547	0.178324
Ddx52	0.248054	0.799639	0.811587	0.972829	-0.609168	-0.315471	0.204447	-0.0892503
Sult2b1	0.214636	0.44538	0.910996	0.970674	-0.353312	-0.310879	0.0829096	0.0404769
Nefl	0.730446	0.352315	0.641306	0.777323	-0.130434	-0.845139	-0.202439	0.512266
Myo1b	0.247743	0.835875	0.977177	0.856969	0.290016	0.0987797	-0.0107456	0.180491
Hmox1	0.196533	0.6194	0.879023	0.794407	0.748357	0.330152	0.0832077	0.501413
Spag1	0.974325	0.854334	0.604789	0.876772	-0.0110715	-0.0950712	-0.241195	-0.157195
Lmcd1	0.542602	0.329011	0.62992	0.513274	0.201562	-1.14013	-0.38465	0.957041
Dlg2	0.634588	0.891165	0.62992	0.987	-0.151539	0.0740951	0.244543	0.0189088
Tgm3	0.0339789	0.528898	0.359374	0.901692	-0.594447	-0.485669	0.31213	0.203351
Sap130	0.22912	0.966555	0.965443	0.638825	0.3361	-0.0265947	-0.0264762	0.336218
Fetub	0.187871	0.889018	0.35992	0.978893	-0.567237	-0.097858	0.42245	-0.0469295
Alox12b	0.492896	0.506924	0.722357	0.98277	-0.210031	-0.473536	-0.228184	0.0353207
Arg1	0.919778	0.815597	0.830114	0.835757	-0.0409805	-0.358158	0.174255	0.491432
Dapl1	0.831439	0.709366	0.800755	0.88411	0.11333	-0.368537	-0.138791	0.343076
Clec2d	0.76658	0.835875	0.95201	0.967761	0.224466	0.297074	-0.0630876	-0.135696
Ube2k	0.390576	0.485553	0.880644	0.942969	0.206337	0.2185	0.0712888	0.0591267
Sptlc3	0.938533	0.764374	0.312221	0.815356	-0.0291467	-0.140233	-0.357867	-0.246781
Brap	0.410053	0.801581	0.800755	0.832321	-0.23086	0.230572	0.144484	-0.316948
Tgm5	0.00438669	0.790554	0.264223	0.941785	-0.888236	-0.328999	0.700564	0.141327
Mphosph6	0.544818	0.699845	0.962784	0.972829	-0.171331	-0.155961	-0.0225313	-0.0379013
Cpa4	0.569183	0.295433	0.605261	0.896428	-0.194405	-0.711907	-0.327805	0.189697
Saal1	0.200963	0.764666	0.560741	0.791493	0.328393	-0.175944	-0.222753	0.281584
Cdk7	0.753628	0.491279	0.900481	0.913524	-0.100494	-0.297384	-0.0766866	0.120204
Mki67	0.274652	0.994328	0.721138	0.93266	-0.243751	-0.00391295	0.148186	-0.0916527
Trio	0.567769	0.518469	0.645164	0.5656	0.116149	0.270015	-0.18731	-0.341176
Idh3a	0.958053	0.538504	0.776089	0.625847	-0.0124001	-0.225133	0.092158	0.304891
Fn1	0.902703	0.30439	0.720265	0.792832	0.0446258	0.474782	0.139543	-0.290613
Prdm1	0.881751	0.825758	0.59079	0.965957	-0.0495678	0.516283	0.369003	-0.196848
Esyt3	0.866795	0.423007	0.94595	0.891606	-0.116402	-0.456103	-0.0733308	0.26637
Gnl2	0.405763	0.832176	0.394488	0.999781	-0.247782	0.108974	0.356548	-0.00020848
Slc9a3r1	0.755811	0.857999	0.922609	0.828178	-0.117095	0.139702	-0.0506386	-0.307436
Mrpl13	0.437073	0.347208	0.627854	0.60696	0.230285	-0.432939	-0.287823	0.3754
Micall1	0.152265	0.587722	0.824174	0.771338	0.346294	0.216352	0.101302	0.231244
Rrm2	0.0509228	0.972072	0.698986	0.881594	-0.506754	-0.0515585	0.18198	-0.273216
Tppp	0.73335	0.217901	0.727762	0.430628	-0.126077	0.651955	0.184985	-0.593047
Glrx	0.242808	0.530788	0.913513	0.935925	-0.398339	-0.661661	-0.0823108	0.181011
Fam98a	0.50424	0.453397	0.654215	0.731949	-0.187423	0.380514	0.237745	-0.330192
Hspa4l	0.0562485	0.844957	0.467998	0.89564	-0.41508	-0.0893365	0.215905	-0.109839
Man1a1	0.146328	0.219749	0.932848	0.984593	0.488804	0.515806	0.0526112	0.0256084
Rab25	0.143984	0.535591	0.95201	0.895383	-0.367643	-0.215919	0.0308399	-0.120884
Patl1	0.896299	0.627127	0.886877	0.93266	0.040576	0.1982	0.0702308	-0.0873936
Pdlim3	0.850627	0.237819	0.631194	0.517118	0.152613	-1.70989	-0.673395	1.18911
Clpx	0.949397	0.760715	0.979313	0.884783	0.0173349	-0.122418	-0.0105893	0.129163
Krt77	0.787761	0.622944	0.970881	0.858385	-0.121313	-0.31468	0.0385977	0.231964
Casp14	0.276031	0.0977427	0.199815	0.933629	-0.219372	-0.761492	-0.459253	0.0828678
Tpd52	0.429288	0.397618	0.824174	0.999366	0.316459	0.402719	0.0961236	0.00986353
Slc15a1	0.618472	0.534715	0.876088	0.970788	-0.137937	-0.286529	-0.109126	0.0394657
Gda	0.396317	0.93686	0.790543	0.988224	-0.285653	-0.0681603	0.194618	-0.0228747
Eif6	0.120657	0.821358	0.575373	0.998001	-0.366612	-0.161228	0.215796	0.0104126
Emilin1	0.497577	0.531193	0.939446	0.905317	0.235343	0.302128	-0.0690718	-0.135857
Arpc2	0.161635	0.837408	0.894806	0.89564	-0.27165	-0.101624	0.048253	-0.121773
Asap2	0.145648	0.979392	0.619335	0.890491	-0.604775	0.0466371	0.312175	-0.339237
Fabp5	0.0423042	0.488606	0.612746	0.942969	-0.750096	-0.59463	0.284482	0.129016
Psat1	0.299011	0.853704	0.893069	0.740698	0.204693	-0.0882035	-0.0508034	0.242094
Irs1	0.111128	0.535195	0.989992	0.646391	1.06722	0.312386	-0.0120505	0.742782
Pdzd11	0.305997	0.332069	0.998596	0.887881	0.491091	0.771893	0.00295502	-0.277847
Prkci	0.944196	0.880861	0.921893	0.913524	0.0220564	0.0955442	-0.0534363	-0.126924
Dusp14	0.969258	0.85762	0.979313	0.913524	-0.0149291	-0.132706	0.0191917	0.136968
Jmy	0.621657	0.329211	0.819345	0.545711	-0.14144	0.332621	0.121178	-0.352883
Tmem119	0.16339	0.430012	0.987249	0.93266	0.428212	0.325275	-0.00868831	0.0942483
Psma4	0.560879	0.740756	0.927849	0.967761	-0.100602	-0.188021	-0.0387204	0.0486983
Txndc17	0.246792	0.953756	0.621695	0.925898	-0.265384	0.0539538	0.193837	-0.125501
Esrp1	0.437074	0.940349	0.995245	0.851304	-0.195263	-0.0358448	-0.00274028	-0.162158
Endou	0.765165	0.556932	0.758546	0.942549	-0.0714135	-0.276875	-0.13476	0.0707019
Crocc	0.875535	0.631529	0.378866	0.935925	0.0903275	0.906815	0.492106	-0.324382
Pcolce	0.00150925	0.00932146	0.692242	0.16885	2.04768	1.60959	0.313402	0.751487
Polr3g	0.809603	0.55195	0.943997	0.900208	-0.10217	-0.329731	-0.0619523	0.165609
Fchsd1	0.0668561	0.656252	0.388147	0.927953	-0.542024	-0.259292	0.398148	0.115415
Nrbf2	0.576998	0.55268	0.918918	0.924692	0.141245	0.325808	0.0666489	-0.117915
Riok1	0.709908	0.760715	0.893069	0.896405	-0.144664	-0.139611	-0.119602	-0.124655
Lamc3	0.62022	0.99239	0.650796	0.978893	-0.244782	-0.0140972	0.290639	0.0599543
Thbs3	0.152353	0.630135	0.300555	0.373019	0.404585	0.265088	0.458306	0.597804
Slc7a5	0.0723776	0.401072	0.940408	0.96311	-0.659615	-0.515107	0.075231	-0.069277
Rab5a	0.0697172	0.558836	0.945133	0.922527	-0.453955	-0.346893	-0.0315699	-0.138631
Igsf3	0.388872	0.93686	0.675792	0.999629	-0.213057	-0.0415592	0.16739	-0.00410796
Scaf4	0.872089	0.982364	0.927083	0.969982	-0.0788776	-0.0232126	0.11363	0.0579645
Kif2a	0.594927	0.950125	0.827832	0.857055	0.106816	0.0355731	0.0771775	0.14842
Cndp2	0.262769	0.931181	0.73581	0.976761	-0.219046	-0.0583858	0.126906	-0.0337545
Tuba1c	0.481993	0.977861	0.921926	0.954554	-0.192752	-0.0411764	0.0436563	-0.107919
P3h1	0.000800978	0.00669702	0.479307	0.586621	1.70111	1.70982	0.403695	0.394987
Gas1	0.862334	0.809743	0.793946	0.89564	-0.118099	-0.127881	0.221107	0.230889
Mrps10	0.487497	0.798589	0.446068	0.956455	-0.307549	0.242282	0.436486	-0.113345
Srprb	0.990533	0.841613	0.974725	0.924595	0.00271214	0.125243	0.0140117	-0.108519
Phyhip	0.178479	0.35564	0.755497	0.981539	-0.403728	-0.546684	-0.175877	-0.0329209
Atp6v1b2	0.629133	0.957992	0.637252	0.970788	-0.113124	0.0344042	0.183303	0.0357744
Vwa2	0.126445	0.290634	0.9425	0.927953	0.915715	0.651352	-0.0808746	0.183488
Emc7	0.309377	0.889913	0.612746	0.914804	0.251232	-0.0709147	-0.221692	0.100454
Slc31a1	0.906642	0.77931	0.759995	0.985889	0.051639	-0.190451	-0.264592	-0.0225024
Igfbp5	0.152265	0.452064	0.380976	0.848752	0.494465	0.498812	0.307507	0.30316
Tpmt	0.0643629	0.978187	0.9192	0.545711	0.531729	0.0289264	-0.0993215	0.403481
Aldh7a1	0.825268	0.719761	0.872576	0.89564	0.0659827	-0.158312	-0.112867	0.111428
Slc7a1	0.603175	0.926981	0.5236	0.937619	-0.224292	0.155078	0.56248	0.18311
Plbd1	0.966289	0.581111	0.399364	0.967559	0.0119047	-0.351642	-0.296941	0.0666051
Apool	0.624817	0.892069	0.746908	0.973279	0.0960177	-0.0668805	-0.13606	0.0268379
Hccs	0.848045	0.909316	0.930904	0.947114	0.0522157	0.0919445	-0.0434894	-0.0832181
Thbs2	0.602596	0.884193	0.9122	0.86634	0.369101	-0.127183	-0.155045	0.34124
Memo1	0.393984	0.453983	0.883082	0.956878	-0.173102	-0.292379	-0.0669866	0.0522899
Ppig	0.590962	0.573136	0.888843	0.63131	0.100131	0.28308	-0.099443	-0.282392
Ddx58	0.386839	0.962895	0.955688	0.813795	0.15738	0.0263217	0.0253736	0.156432
Krt31	0.0530667	0.997591	0.680788	0.22971	1.11333	0.00165308	-0.453628	0.658046
Fbln5	0.208432	0.966052	0.35992	0.896391	0.548115	0.0294999	-0.321536	0.19708
S100a11	0.66296	0.308139	0.803345	0.843258	-0.318862	-0.633159	0.143779	0.458076
Klk8	0.938845	0.629395	0.883082	0.9352	-0.0443784	-0.284064	-0.0891054	0.15058
Gstm5	0.729056	0.981231	0.859011	0.970818	0.0982595	0.0151753	-0.116758	-0.0336734
Txn	0.722201	0.496136	0.538693	0.715099	-0.137462	-0.276797	0.241797	0.381133
Tinagl1	0.114936	0.00612997	0.948681	0.24379	-0.595921	-1.26971	0.0414992	0.715293
Sdr16c5	0.663121	0.857999	0.60511	0.979766	0.147812	-0.130172	-0.239998	0.0379864
Gar1	0.240633	0.358932	0.538693	0.836032	0.563125	0.469701	0.249763	0.343188
Efemp2	0.0188653	0.467002	0.912168	0.484513	0.836029	0.329088	-0.0864072	0.420534
Ptgis	0.0727289	0.304215	0.228019	0.734716	0.594447	0.693745	0.537826	0.438529
Apoe	0.259223	0.130912	0.409641	0.896391	0.249007	0.805933	0.43559	-0.121336
Twf1	0.276097	0.915638	0.783756	0.981539	-0.187552	-0.0711432	0.0916034	-0.0248056
Hspa2	0.117171	0.449963	0.800755	0.216384	-0.299133	0.25174	0.102823	-0.44805
Abhd17b	0.616956	0.808244	0.776089	0.895066	0.288615	-0.361747	-0.263994	0.386368
Cmas	0.869871	0.476848	0.984717	0.731949	0.043766	0.287074	-0.00922483	-0.252532
Pycard	0.370629	0.938917	0.997221	0.752406	-0.241398	0.0529803	-0.00259823	-0.296976
Mrc2	0.00864282	0.0418926	0.604685	0.754247	0.898684	0.921748	0.273639	0.250575
Alox15	0.268921	0.710148	0.608917	0.538575	-0.966414	-0.321343	-0.526254	-1.17132
Dclk1	0.227092	0.0952425	0.939783	0.389054	0.376089	0.996735	0.0757293	-0.544916
Gas6	0.126445	0.638409	0.811587	0.324377	-0.428085	-0.187678	-0.164174	-0.404581
Abca9	0.608133	0.916852	0.827515	0.844878	-0.137201	-0.0906215	-0.16472	-0.2113
Sts	0.0697172	0.58895	0.264223	0.731949	0.523591	-0.422721	-0.479376	0.466936
Rras	0.964384	0.67056	0.652557	0.935925	0.0149015	-0.363396	-0.238174	0.140124
Eif2s2	0.0515292	0.295942	0.960975	0.90148	-0.466694	-0.381536	-0.0221275	-0.107286
Deptor	0.355851	0.856171	0.939783	0.678393	-0.24998	0.0894812	0.0526862	-0.286775
Itgb3	0.270818	0.126927	0.840311	0.770306	0.329293	0.735547	0.128456	-0.277797
Prss27	0.530954	0.200935	0.722357	0.715093	-0.272438	-1.14727	-0.341046	0.533789
Vsnl1	0.076632	0.549671	0.918674	0.869544	-0.659211	-0.355496	0.0940953	-0.209619
Cpsf3	0.809603	0.83182	0.894768	0.998381	-0.0554998	-0.119227	-0.0709542	-0.00722655
Pla2g4e	0.987058	0.799639	0.100379	0.216384	0.0068839	0.165394	0.952469	0.793959
Tecr	0.896244	0.688458	0.671778	0.938777	0.0441851	-0.23654	-0.183341	0.0973843
Mboat2	0.851342	0.622944	0.567383	0.933629	0.0700793	-0.486665	-0.392577	0.164167
Rhob	0.324403	0.621457	0.807004	0.638825	-0.363237	0.171333	0.157158	-0.377413
Utp3	0.630718	0.458484	0.945604	0.815356	-0.14973	-0.267573	0.0569686	0.174811
Tmem40	0.0763061	0.586672	0.642051	0.978893	-0.914548	-0.470341	0.495483	0.0512754
Aldh3b2	0.216758	0.350715	0.96359	0.935386	-0.275196	-0.376798	-0.0243502	0.0772511
Ptprc	0.0354599	0.362631	0.918918	0.879166	-0.840058	-0.540245	0.0636122	-0.236201
Fuca1	0.858674	0.8966	0.128893	0.350167	0.0444771	0.0772176	-0.462482	-0.495223
Rpp38	0.492896	0.859407	0.95201	0.978893	0.244048	0.157775	-0.0357897	0.050483
Ephx3	0.918075	0.801581	0.757357	0.771829	-0.0640398	-0.260719	0.293761	0.490441
Tgfb1i1	0.808029	0.979476	0.605261	0.838598	0.109143	-0.0429122	0.273739	0.425794
Myd88	0.930142	0.911898	0.946347	0.901227	0.0369318	-0.103423	0.0505346	0.19089
Nova1	0.0402808	0.846284	0.999722	0.407756	0.876593	0.184777	-0.00175649	0.690059
Slc12a7	0.619434	0.878991	0.68447	0.937994	-0.16189	0.113424	0.168682	-0.106633
Spryd7	0.689506	0.636608	0.904966	0.978272	-0.184551	-0.203406	-0.0678713	-0.0490157
Ppp1r1b	0.21521	0.831937	0.809388	0.926829	-0.588154	-0.201041	0.188575	-0.198538
Sema4b	0.766111	0.920591	0.72574	0.832277	-0.075373	0.0904588	-0.1115	-0.277332
Lypd3	0.280827	0.942241	0.638519	0.997639	-0.263942	-0.0827303	0.197006	0.0157944
Cadm3	0.607467	0.905685	0.608917	0.967559	0.201401	-0.102914	-0.373334	-0.069019
Plch2	0.368103	0.830486	0.760266	0.754247	-0.207928	-0.0933647	-0.119305	-0.233868
Ywhaz	0.0409009	0.570179	0.96359	0.930645	-0.42212	-0.301467	0.0183608	-0.102292
Gsk3a	0.352455	0.979392	0.76105	0.915241	-0.24143	-0.0159236	0.115717	-0.10979
Aox1	0.490199	0.329011	0.999722	0.658783	-0.238603	-0.619578	0.000140183	0.381114
Anp32b	0.251441	0.622944	0.654215	0.715093	-0.239989	0.278761	0.161877	-0.356874
Maoa	0.484182	0.535195	0.783756	0.972829	-0.137117	-0.192958	-0.0851479	-0.0293066
Msmo1	0.901349	0.605304	0.359374	0.407756	0.0510548	-0.221669	0.313398	0.586122
Ndrg4	0.08897	0.2818	0.641306	0.938058	0.521481	0.757059	0.337871	0.102293
F3	0.0926647	0.66873	0.675792	0.0955587	-0.519222	-0.163323	-0.258583	-0.614482
Prkaa2	0.08897	0.520903	0.102233	0.849253	0.426073	-0.414445	-0.588524	0.251994
Tpbg	0.525202	0.89441	0.921266	0.943514	0.390378	0.144491	-0.085844	0.160043
Tom1l1	0.377634	0.805379	0.38099	0.999629	-0.187163	0.178699	0.359965	-0.00589599
Rgs20	0.881751	0.138248	0.704381	0.787787	-0.0920506	0.543574	0.305962	-0.329663
Snap29	0.736462	0.966476	0.882219	0.856969	-0.0793146	0.0337123	-0.0724644	-0.185491
Dsc2	0.0630351	0.56089	0.128893	0.514524	-0.50965	-0.379778	0.677056	0.547184
S100a14	0.587939	0.597194	0.790543	0.98277	-0.254846	-0.376714	-0.16562	-0.0437514
Smpdl3b	0.400948	0.276149	0.918918	0.967761	-0.288644	-0.426098	-0.0904467	0.0470076
Serpinh1	0.00229045	0.00612997	0.794219	0.760006	1.75742	1.66922	0.193292	0.2815
Wfdc12	0.818681	0.350396	0.589962	0.88411	0.153196	1.09568	0.526534	-0.415949
Nt5c3a	0.763142	0.601764	0.948076	0.738477	0.0749017	-0.280786	-0.0315905	0.324097
Pbxip1	0.276819	0.467453	0.424082	0.715093	0.265761	-0.964586	-0.416275	0.814072
Tex2	0.720888	0.518469	0.802918	0.938777	-0.189047	-0.343479	-0.256099	-0.101667
Ltv1	0.888274	0.833489	0.970881	0.972829	-0.0462043	-0.10331	-0.0225804	0.0345256
Ctsc	0.207971	0.961179	0.530059	0.90766	-0.363943	0.0415057	0.253957	-0.151493
Atp1b3	0.449339	0.309958	0.900105	0.736811	-0.15947	-0.328209	0.0551697	0.223908
Galnt3	0.752555	0.942241	0.824174	0.985163	-0.128081	0.0542271	0.155641	-0.0266671
Fermt2	0.76658	0.601764	0.95201	0.932109	0.109121	0.262955	0.0426027	-0.111231
Stat1	0.654783	0.767079	0.95201	0.801759	-0.124016	0.179566	0.0281297	-0.275452
Rptn	0.0140155	0.877264	0.0159337	0.925898	-1.76087	0.231518	2.24543	0.253051
Elovl4	0.941609	0.931326	0.865256	0.789919	0.0371245	-0.0481294	0.165594	0.250848
Brcc3	0.0354599	0.540543	0.814209	0.832321	-0.673744	-0.315875	0.130351	-0.227518
Tpsb2	0.405827	0.93686	0.876088	0.771829	-0.437215	-0.0966232	-0.164082	-0.504674
Cisd2	0.351985	0.747663	0.95201	0.949489	0.463806	0.288185	-0.0393597	0.136261
C1qa	0.736462	0.221524	0.32626	0.511164	-0.16314	1.45217	0.558677	-1.05663
Mical3	0.144441	0.720825	0.690074	0.992097	-0.419753	-0.250045	0.147047	-0.0226614
Xrcc1	0.48331	0.726652	0.806726	0.80772	0.193509	-0.198404	-0.150151	0.241762
Ssx2ip	0.795083	0.73646	0.697729	0.942417	-0.121156	-0.220401	-0.211329	-0.112084
Acer1	0.251497	0.987713	0.641306	0.884783	-0.953273	0.0161346	0.632075	-0.337333
Il36b	0.215287	0.322317	0.722843	0.789919	-0.388648	-0.484237	0.192086	0.287674
Zc3h15	0.36252	0.834233	0.982046	0.832321	-0.332557	-0.102269	-0.0123297	-0.242618
Col16a1	0.82017	0.794414	0.876088	0.924595	-0.202581	0.380987	0.320174	-0.263394
Fap	0.0667766	0.517917	0.811587	0.999629	0.744261	0.530922	-0.214914	-0.00157515
F10	0.176064	0.79784	0.843977	0.93266	-0.46937	-0.180187	0.197661	-0.0915229
Nnmt	0.175164	0.304215	0.939446	0.832321	0.485103	0.903692	0.102596	-0.315993
Nlrp10	0.696203	0.517805	0.56215	0.807105	-0.122601	-0.290398	-0.368163	-0.200367
Csnk2a2	0.524316	0.700894	0.95201	0.970761	-0.124708	-0.200613	-0.0375917	0.0383142
Rab38	0.502428	0.431221	0.335294	0.978893	-0.196368	-0.473597	-0.32233	-0.0451019
Cdh3	0.287928	0.762122	0.605257	0.869999	-0.243697	-0.262477	0.235188	0.253968
Mxra8	0.722394	0.802978	0.35992	0.813162	0.149859	0.276958	-0.334346	-0.461445
Abca6	0.830746	0.914612	0.889881	0.970674	0.0671343	-0.118459	-0.117571	0.0680223
Slc6a9	0.745191	0.802356	0.60511	0.822737	0.0780305	0.115886	0.212085	0.174229
Cwh43	0.906642	0.372366	0.0376909	0.0297062	0.042379	-0.30678	0.722582	1.07174
Ube2g1	0.46081	0.802725	0.722567	0.943919	0.217509	0.120152	-0.169196	-0.0718392
Parp2	0.835605	0.741119	0.688327	0.969982	-0.0775698	0.318689	0.323002	-0.0732567
Kif11	0.0345081	0.95669	0.268568	0.793652	-0.834192	0.0846704	0.434482	-0.484381
Sncg	0.00755217	0.401072	0.972643	0.804969	-0.98072	-0.637548	-0.0190738	-0.362246
Hsd11b1	0.388776	0.00127936	0.979239	0.000531064	-0.251158	-2.41421	-0.0145139	2.14854
Fam162a	0.727082	0.903197	0.803345	0.926829	-0.240648	0.117596	0.130761	-0.227484
Ubqln2	0.463478	0.824541	0.939446	0.999629	-0.311235	-0.225894	0.0828419	-0.00249979
Cnnm4	0.593886	0.709366	0.50727	0.918716	-0.142479	-0.241468	-0.248799	-0.149811
Cds1	0.229679	0.99188	0.663705	0.935925	0.391905	0.0156731	-0.236992	0.13924
Pde2a	0.869871	0.330996	0.688327	0.798866	-0.079037	-0.754191	-0.258027	0.417127
Gna11	0.41566	0.972072	0.744962	0.979766	0.154282	0.0219743	-0.108959	0.0233484
Trim16	0.724625	0.877264	0.686453	0.96232	-0.100271	0.114984	0.144646	-0.0706079
Xpnpep2	0.683997	0.921253	0.612746	0.933128	0.092961	-0.0675297	-0.242343	-0.0818518
Cldn5	0.14775	0.799639	0.943997	0.917587	0.604649	0.303827	-0.0636956	0.237126
Rps28	0.460308	0.920591	0.327016	0.998738	-0.195006	0.104671	0.287603	-0.0120745
Ranbp9	0.856599	0.796789	0.922408	0.905317	0.0615788	0.152201	-0.055194	-0.145816
Axl	0.126445	0.333084	0.688327	0.736811	0.290299	0.373316	-0.152472	-0.235489
Mapt	0.0237923	0.959017	0.359374	0.755508	0.680861	-0.0602034	-0.346207	0.394857
Map7	0.957009	0.540543	0.945887	0.734725	-0.0187748	0.271546	-0.037435	-0.327755
Hook1	0.437594	0.856474	0.95201	0.992729	-0.136478	-0.128239	0.0243903	0.0161516
Mrps15	0.904093	0.852623	0.936145	0.913524	-0.0419666	-0.124007	0.0540644	0.136104
Ublcp1	0.27651	0.724484	0.670822	0.799847	0.205953	-0.150162	-0.167768	0.188347
Cbr1	0.639626	0.689208	0.668898	0.771338	0.122523	0.150551	-0.189319	-0.217347
Sccpdh	0.633441	0.724484	0.692242	0.89564	0.12543	-0.278603	-0.200257	0.203776
Comp	0.594478	0.471353	0.877194	0.978893	-0.508654	-0.811418	-0.382288	-0.0795244
Ivl	0.121857	0.710148	0.732713	0.942417	0.532847	0.270702	-0.146386	0.115759
Rdh16	0.286925	0.916544	0.560741	0.902953	0.420308	-0.116253	-0.301732	0.234829
Slc12a4	0.396869	0.426215	0.864938	0.989904	0.250825	0.345286	0.0743907	-0.02007
Lrrc8d	0.490531	0.935967	0.462209	0.997639	-0.24042	0.080333	0.303255	-0.0174987
Podn	0.0622917	0.711991	0.246145	0.0528385	0.473783	0.151762	0.457937	0.779958
Mcur1	0.875535	0.529725	0.715307	0.844757	-0.118834	0.76168	0.351585	-0.528929
Top2a	0.126419	0.859393	0.604559	0.926829	-0.528707	-0.112703	0.295952	-0.120052
Fcgrt	0.54588	0.544018	0.943775	0.978893	0.291964	0.29099	0.0499556	0.0509295
Cstb	0.620284	0.858262	0.83941	0.879195	-0.208514	0.122201	0.0815324	-0.249183
Rbm34	0.930142	0.962895	0.803345	0.921844	-0.0301428	-0.0276988	0.110519	0.108075
Fam83c	0.0723776	0.832176	0.383044	0.794739	-0.42474	0.109607	0.325549	-0.208799
Tigar	0.160457	0.92842	0.807004	0.582123	-0.399222	-0.0832691	-0.161411	-0.477363
Vps29	0.168352	0.622944	0.732456	0.992529	-0.318868	-0.168718	0.137672	-0.012478
Ggh	0.856599	0.517805	0.643153	0.884783	0.0536724	-0.333499	-0.217288	0.169884
Slc6a14	0.0208944	0.106524	0.689502	0.594217	-0.736357	-0.59944	-0.187862	-0.324779
Pm20d1	0.0508669	0.40441	0.812998	0.754247	-0.581015	-0.423633	-0.139385	-0.296768
Slc1a4	0.925282	0.638409	0.61195	0.970818	-0.0621912	0.246867	0.233451	-0.0756072
Sod3	0.941999	0.907069	0.301371	0.783486	0.0266267	0.0934947	0.398699	0.331831
Cfd	0.47292	0.62948	0.984199	0.546799	-0.478178	0.47928	0.0245811	-0.932877
Il36g	0.327673	0.366793	0.953024	0.972829	-0.423584	-0.445349	-0.0645746	-0.0428094
Lin7c	0.44967	0.50378	0.945133	0.999629	0.470462	0.509887	0.0379582	-0.00146671
Lifr	0.0763061	0.938262	0.972345	0.401692	0.532049	0.0679371	0.0298852	0.493997
Tgfbr3	0.744231	0.999592	0.96359	0.96232	0.125449	-0.00085593	-0.0334892	0.0928159
Hat1	0.52831	0.62338	0.961634	0.924595	0.125293	0.258841	0.0235371	-0.110012
Rdh12	0.809603	0.497991	0.455099	0.89564	0.156088	-0.570513	-0.414671	0.311931
Gba	0.69713	0.366793	0.5236	0.979815	-0.137734	-0.417341	-0.311721	-0.0321139
Bag2	0.462269	0.97983	0.424082	0.89817	-0.175745	-0.029604	0.338806	0.192666
Folr2	0.451756	0.777506	0.990892	0.941785	-0.408563	-0.291642	-0.0154939	-0.132415
Plekhf2	0.157366	0.852554	0.993432	0.731949	-0.43974	-0.141943	-0.00734331	-0.30514
Pkn1	0.0625763	0.150172	0.930973	0.640442	0.410983	0.62056	-0.058479	-0.268056
Ppif	0.255802	0.595759	0.939446	0.393638	0.579976	-0.396381	-0.0852076	0.89115
Srpk1	0.0526247	0.0952425	0.685788	0.830224	-0.580343	-0.644002	-0.22973	-0.166071
Hddc2	0.24185	0.450396	0.754608	0.799847	0.759517	0.390326	0.143061	0.512252
Pno1	0.619735	0.545516	0.983086	0.373019	0.21088	-0.465093	0.0234863	0.699459
Cers3	0.335157	0.323829	0.859011	0.883547	-0.357711	-0.793244	-0.17239	0.263143
Slco2a1	0.682224	0.81722	0.781117	0.909349	-0.152554	-0.158948	0.159331	0.165725
Slc28a3	0.0384799	0.247867	0.999434	0.821803	-0.705541	-0.490822	0.00120491	-0.213514
Bmp1	0.420245	0.330744	0.389853	0.970761	0.359504	0.795524	0.518494	0.082474
Rhod	0.261612	0.908643	0.891563	0.261263	-0.541099	-0.240047	-0.374453	-0.675504
Lypd5	0.418912	0.882436	0.999722	0.913524	-0.398757	-0.163662	0.00096978	-0.234125
Mpzl3	0.50367	0.68717	0.982046	0.966381	-0.23108	-0.283302	0.018794	0.0710156
Zwilch	0.74168	0.988719	0.977177	0.932878	-0.153761	-0.01915	-0.024699	-0.15931
Cd34	0.883596	0.508744	0.988271	0.793652	0.0605979	0.411732	0.00887987	-0.342255
Csrp2	0.416255	0.366793	0.35992	0.771829	0.319015	-0.668777	-0.55477	0.433021
Gjb4	0.470076	0.656622	0.530706	0.754247	-0.44327	-0.474864	-0.66505	-0.633456
Cd14	0.746631	0.868087	0.59079	0.908659	0.11005	0.205202	0.326642	0.23149
Cox5a	0.481812	0.726706	0.896432	0.851141	0.589775	0.167299	0.0729884	0.495464
Aqp5	0.0468266	0.966052	0.565071	0.629973	-1.47631	0.0862815	0.554446	-1.00815
Ncaph	0.145576	0.884482	0.863201	0.903956	-0.394899	-0.121735	0.113516	-0.159647
Nubp1	0.558535	0.90063	0.625544	0.879166	-0.145196	-0.0972329	0.232759	0.184796
Ptprs	0.917246	0.419246	0.821647	0.801759	0.0539952	-0.444851	-0.188778	0.310069
Bloc1s3	0.573588	0.540543	0.459528	0.935925	-0.260161	0.420408	0.547762	-0.132806
Tfdp1	0.0651495	0.989198	0.900105	0.221766	0.685486	0.0126501	0.102194	0.77503
Fbxo45	0.676696	0.785431	0.970881	0.938712	-0.167329	-0.121647	-0.0324695	-0.0781512
Vdac1	0.601684	0.545516	0.86876	0.927953	-0.142292	-0.339548	-0.0717064	0.125549
Dynll1	0.0130677	0.322962	0.953417	0.640442	-1.74699	-0.966093	-0.0489673	-0.829864
Lclat1	0.455177	0.994328	0.913513	0.793652	0.170791	-0.00589865	0.0632425	0.239932
Fen1	0.168985	0.458484	0.983215	0.927953	-0.419087	-0.326921	-0.0119926	-0.104159
Hmgb2	0.16477	0.605304	0.80517	0.988224	-0.32883	-0.190495	0.123609	-0.0147261
Rab3il1	0.722394	0.412579	0.800755	0.884783	0.14821	0.57195	0.172349	-0.251392
Lrrc17	0.394082	0.456193	0.977177	0.908659	0.318506	0.454643	-0.0263377	-0.162475
Mreg	0.156886	0.911632	0.933866	0.754247	-0.372178	-0.133129	-0.106092	-0.345142
Leo1	0.114867	0.946015	0.95201	0.49725	-0.327337	0.0567664	-0.0407462	-0.42485
Tubb2a	0.601344	0.872984	0.50376	0.999629	-0.0941416	0.0945749	0.183138	-0.00557823
Sh3bgrl3	0.0824497	0.552365	0.667536	0.909468	-1.1061	-0.443963	0.428908	-0.233227
Mphosph10	0.823975	0.978187	0.745028	0.79562	0.087038	0.0261163	0.224004	0.284926
Psme3	0.39977	0.662087	0.744257	0.757242	-0.257958	0.184585	0.147671	-0.294871
Reck	0.162722	0.601764	0.948076	0.959627	0.473754	0.680582	0.0630127	-0.143816
Galnt6	0.426958	0.813722	0.923759	0.892652	-0.384117	-0.221525	-0.101591	-0.264183
Kctd1	0.544573	0.989198	0.936145	0.93266	-0.2577	-0.0196887	0.0584517	-0.179559
Neu2	0.481993	0.271556	0.92166	0.714502	-0.295024	-0.975449	-0.109002	0.571423
Smg7	0.1973	0.884812	0.598477	0.843258	-0.388259	0.111216	0.250279	-0.249197
Ifi30	0.811267	0.994328	0.858843	0.998001	0.216968	0.0107022	-0.231821	-0.0255557
S100a9	0.836665	0.672638	0.288819	0.363822	0.303589	-1.947	2.2678	4.5184
Rab27b	0.963354	0.529725	0.873963	0.46458	-0.0153933	0.286178	-0.112792	-0.414363
Srd5a3	0.334439	0.941662	0.956224	0.89564	-0.42408	-0.105879	0.0712274	-0.246973
Rfx2	0.463478	0.397767	0.570136	0.864842	0.308405	0.401303	0.334333	0.241435
Atp10b	0.804095	0.254601	0.849804	0.941385	-0.133917	-0.398725	-0.176041	0.0887662
Ube2a	0.6575	0.814108	0.922609	0.961614	0.231328	0.234082	0.108936	0.106182
Chrac1	0.525236	0.547028	0.606913	0.844757	-0.322967	-0.390025	-0.389851	-0.322793
Cysrt1	0.826551	0.845931	0.939888	0.900239	0.175489	-0.29892	-0.134285	0.340124
Gjb6	0.720888	0.518959	0.796631	0.732943	-0.298958	-0.494678	0.403267	0.598988
Rabif	0.601344	0.37833	0.876088	0.978893	0.184894	0.30209	0.0802049	-0.036991
C5ar1	0.0263833	0.371637	0.250595	0.652712	-0.844932	-0.721406	0.691475	0.567948
Fxyd3	0.79748	0.271556	0.790543	0.813795	-0.386629	0.848013	0.375507	-0.859136
Nipal4	0.38077	0.573167	0.738966	0.985164	-0.256934	-0.503633	-0.280549	-0.0338495
Dnajb6	0.0566836	0.391092	0.864371	0.835757	-0.721541	-0.379065	0.152683	-0.189793
Mpzl2	0.356114	0.397618	0.942947	0.948028	-0.361825	-0.534708	-0.0816829	0.0912007
Dynlt3	0.944968	0.498542	0.684491	0.998806	0.0901749	1.68181	1.60994	0.0183076
Vmp1	0.681283	0.299624	0.806535	0.449527	0.16301	-0.671716	-0.198071	0.636655
Plekha6	0.372072	0.822182	0.812998	0.999629	0.389269	0.192735	-0.192095	0.00443846
Slc2a1	0.127734	0.0865504	0.845776	0.830224	-0.650771	-0.724331	0.164994	0.238554
Mal2	0.445272	0.453412	0.722567	0.89564	-0.264724	-0.707906	-0.149976	0.293206
Atp6v0c	0.104445	0.662087	0.663705	0.96232	-1.21318	-0.432588	0.666773	-0.113817
Ctdnep1	0.99752	0.892997	0.970483	0.964351	-0.00230854	-0.142567	-0.0264923	0.113766
Pla2g2f	0.163217	0.939105	0.359374	0.902008	0.780365	-0.0925008	-0.601266	0.271599
Adgra2	0.563764	0.907437	0.977177	0.895152	0.223951	-0.280751	-0.0310116	0.473691
Otx1	0.81746	0.711726	0.978078	0.903956	0.155503	0.53459	0.0416603	-0.337426
Cldn23	0.253213	0.973742	0.762006	0.495036	-0.509094	0.0399999	-0.208716	-0.75781
Procr	0.90772	0.323829	0.881939	0.734847	0.0834299	-0.634762	-0.114742	0.60345
Fxyd1	0.75956	0.0288031	0.836134	0.140707	-0.213701	-1.5554	-0.319665	1.02203
Cda	0.867114	0.822182	0.936145	0.809503	-0.122735	0.29049	-0.116653	-0.529879

## Sheet: Pustulosis_Les vs.Non-Les
Comparison DEGs of palmoplantar pustulosis with Skin data (doi.org/10.1016/j.jaci.2022.04.027, Lesional vs Nonlesional DEGs)											Proteins with age- and/or sex-dependent significances
	q value				Log2FC						q value ≤ 0.05
Gene Name	Skin_Fe4w/Fe14w	Skin_Ma4w/Ma14w	Skin_Ma4w/Fe4w	Skin_Ma14w/Fe14w	Skin_Fe4w/Fe14w	Skin_Ma4w/Ma14w	Skin_Ma4w/Fe4w	Skin_Ma14w/Fe14w
Vps51	0.862334	0.941053	0.974254	0.925898	-0.0396985	0.0620354	-0.0143247	-0.116059
Krt75	0.256838	0.759936	0.910782	0.5473	-0.670498	-0.246452	-0.186899	-0.610945
Pnp	0.487497	0.741231	0.970881	0.999629	-0.15842	-0.145726	0.0167039	0.0040107
Camsap3	0.704283	0.841613	0.983739	0.999629	0.104773	0.118992	0.00962657	-0.00459241
Pgm2	0.760988	0.668651	0.974254	0.754247	-0.0830387	0.21751	0.0170771	-0.283471
Pebp1	0.788518	0.790782	0.956224	0.968411	0.115653	0.232296	0.0400525	-0.0765905
Lman1	0.172051	0.306301	0.649851	0.96311	0.277893	0.499063	0.163739	-0.0574308
Col15a1	0.0835655	0.270177	0.680178	0.791493	0.402343	0.482096	-0.154671	-0.234424
Rrbp1	0.0115043	0.0133365	0.373091	0.959575	0.939352	1.2689	0.391858	0.0623124
Macrod1	0.111904	0.56089	0.451947	0.654675	0.502026	-0.55857	-0.420215	0.640381
Rplp1	0.392421	0.958459	0.95201	0.913524	0.432971	0.0946772	-0.0466297	0.291664
Ttc39b	0.210824	0.332771	0.392659	0.687244	-0.304441	-0.351194	0.257558	0.304311
Rpl32	0.756569	0.832176	0.888843	0.754247	-0.147074	0.169832	-0.118492	-0.435397
Tubb6	0.630718	0.658958	0.918637	0.943514	0.168607	0.380381	0.093081	-0.118693
Pld2	0.729	0.530788	0.676799	0.978893	-0.101313	-0.277542	-0.206442	-0.0302128
Il18	0.787025	0.431221	0.612746	0.949289	-0.119711	-0.515893	-0.289272	0.10691
Lyn	0.340787	0.978153	0.944573	0.89564	-0.23582	-0.0281113	0.0369104	-0.170798
Tmem43	0.0280991	0.534709	0.335294	0.979754	-0.524544	-0.209473	0.337395	0.0223241
Foxp1	0.973302	0.820446	0.967446	0.851103	0.0100042	-0.170445	0.0309841	0.211433
Chmp4c	0.145927	0.654525	0.755497	0.694545	-0.369098	-0.227658	-0.175467	-0.316906
Hk2	0.340787	0.547464	0.844604	0.789919	-0.174004	-0.484245	0.0798235	0.390065
Anxa4	0.093972	0.820262	0.94833	0.895152	-0.335082	-0.14866	0.0272935	-0.159128
Sh3pxd2a	0.825268	0.905865	0.802918	0.995642	0.0785412	-0.0545464	-0.120512	0.012576
Map4k4	0.199983	0.877934	0.744257	0.812044	-0.257676	0.0953453	0.145862	-0.207159
Tppp3	0.238698	0.348081	0.269675	0.624641	-0.49251	0.639875	0.494278	-0.638107
Myo5a	0.539887	0.920591	0.870245	0.98065	-0.149466	-0.0483821	0.0794418	-0.0216424
Tgfbi	0.0219268	0.22472	0.900029	0.844757	-0.64051	-0.54855	-0.0781676	-0.170128
Enah	0.0198188	0.401072	0.722567	0.985561	-0.509418	-0.383169	0.145125	0.0188758
Myh14	0.100352	0.924042	0.861841	0.532573	-0.36648	0.0535475	0.102577	-0.317451
Aldh5a1	0.381164	0.693504	0.956009	0.998973	-0.181032	-0.214512	-0.0263421	0.00713811
Cotl1	0.383055	0.662087	0.987994	0.999629	-0.213311	-0.220384	-0.00591762	0.00115481
Fscn1	0.0232581	0.325151	0.923792	0.815878	0.978896	0.615465	-0.104325	0.259105
Vat1	0.325949	0.841613	0.95201	0.926829	-0.18777	-0.0848704	0.0207668	-0.0821323
Ctsf	0.890519	0.95913	0.801893	0.86634	-0.043209	-0.0420409	-0.165627	-0.166795
Rps3a	0.980636	0.499138	0.953772	0.789919	-0.00977256	-0.268202	-0.0503414	0.208088
Cask	0.514698	0.548194	0.936145	0.869544	0.118733	0.204924	-0.0363797	-0.122571
Ccdc115	0.408922	0.52603	0.757357	0.621741	-0.336986	0.369534	0.284648	-0.421872
Col1a1	0.00601126	0.00612997	0.35617	0.00585686	2.01627	1.54175	0.972434	1.44695
Mfap4	0.619434	0.443655	0.95201	0.731137	0.400984	-0.390692	-0.0390463	0.752629
Pdzk1ip1	0.273208	0.871646	0.663705	0.998973	-0.410652	-0.13622	0.264091	-0.0103418
Rps8	0.345678	0.843228	0.751104	0.988224	-0.23444	-0.116929	0.136925	0.0194146
Tnc	0.307362	0.295433	0.98009	0.678393	-0.443449	-1.20303	0.0229387	0.782525
Col6a6	0.0250699	0.0164581	0.722357	0.813795	1.08584	1.26899	-0.141727	-0.324878
Rps11	0.369815	0.45039	0.844347	0.884783	-0.230461	-0.271906	0.0986079	0.140053
Krt17	0.0507022	0.2818	0.755298	0.744922	-0.842708	-1.26021	0.246147	0.663653
Krt16	0.00284028	0.470518	0.0404224	0.653798	-1.59533	-1.87873	1.47334	1.75673
Gdpd3	0.454239	0.914119	0.207569	0.941785	0.213644	-0.159785	-0.530239	-0.156809
Cpeb4	0.381164	0.997591	0.95201	0.838598	-0.336377	-0.0020776	0.0280939	-0.306206
Stard4	0.251497	0.900802	0.863092	0.279889	-0.358534	0.0626029	-0.116553	-0.53769
Nid2	0.864943	0.969004	0.749329	0.926829	0.0445916	0.0292836	-0.11605	-0.100742
Calml3	0.17373	0.570179	0.789734	0.904067	-0.724916	-0.350684	0.130111	-0.244121
Rps14	0.35625	0.692904	0.876088	0.973646	-0.225278	-0.261939	-0.0837326	-0.0470717
Slc5a1	0.0182793	0.193483	0.894058	0.762916	-0.975464	-0.73105	-0.090223	-0.334637
Krt6b	0.0051886	0.621457	0.0109736	0.63285	-2.46722	-2.13139	3.24777	2.91194
Krt6a	0.0027647	0.341644	0.0459288	0.654675	-1.38001	-1.68698	0.914651	1.22162
Trim29	0.0457489	0.547109	0.893069	0.734716	-0.552911	-0.229596	0.0785956	-0.24472
Susd2	0.866323	0.268083	0.0469581	0.970761	-0.0427598	-0.605144	-0.611555	-0.0491708
Prelp	0.216814	0.0699264	0.608275	0.613116	-0.506343	-0.848676	0.195299	0.537633
Des	0.477134	0.126012	0.495932	0.179125	0.496555	-2.61201	-0.950643	2.15792
Col17a1	0.337494	0.909348	0.615088	0.999629	-0.187246	0.0968481	0.280252	-0.00384244
Sptan1	0.236447	0.965343	0.838513	0.831679	-0.222391	0.0292771	0.0694778	-0.18219
Gbp2	0.0395282	0.999592	0.970025	0.424598	-0.716415	-0.000734171	0.0258534	-0.689827
Qsox1	0.373208	0.531633	0.759128	0.789919	-0.258515	-0.219243	-0.173391	-0.212663
Ltbp4	0.254612	0.219117	0.982046	0.814543	0.333766	0.593774	0.0108697	-0.249138
Pdlim2	0.0590027	0.578602	0.865256	0.852563	-0.457823	-0.216229	0.091217	-0.150377
Lsp1	0.0727872	0.711991	0.982046	0.328398	-0.972168	0.476342	0.0152096	-1.4333
Pdxk	0.682191	0.857266	0.929819	0.968154	0.135561	0.0930771	-0.0803624	-0.0378786
Bbox1	0.0761183	0.491723	0.900029	0.779523	-0.499874	-0.29993	-0.0636515	-0.263596
Nid1	0.111825	0.528898	0.872576	0.243281	0.307709	-0.230908	-0.0645874	0.474029
Pard3	0.462551	0.935967	0.888843	0.935354	-0.182934	-0.0434473	0.0592493	-0.0802373
Dysf	0.874923	0.402092	0.930973	0.61479	0.070211	-0.660187	-0.0455795	0.684818
Filip1l	0.444831	0.912425	0.974254	0.88411	0.234726	0.0576674	-0.0170565	0.160002
Tdp2	0.139936	0.66873	0.974254	0.835757	-0.662791	-0.369004	-0.0357417	-0.329529
Rpl11	0.206787	0.600787	0.685788	0.886406	-0.364557	-0.260504	0.253392	0.14934
Dsg3	0.350935	0.759613	0.50727	0.787787	-0.196232	-0.196542	0.277768	0.278078
Ptpre	0.544573	0.88908	0.859193	0.884783	-0.214477	0.0845969	0.122228	-0.176846
Pxdn	0.0235928	0.238399	0.410731	0.0759185	0.886248	0.423427	0.367646	0.830467
Rpl13a	0.457578	0.843228	0.570136	0.942549	-0.19816	0.0955919	0.22356	-0.0701919
Gan	0.725162	0.673918	0.151319	0.640442	-0.121218	-0.180805	-0.46582	-0.406233
Srgap2	0.690938	0.886138	0.374349	0.791493	0.0964789	0.118697	-0.290135	-0.312353
Eppk1	0.0175975	0.471353	0.676799	0.788191	-0.678814	-0.28021	0.186116	-0.212488
Dlx3	0.909146	0.332772	0.839693	0.799847	0.05473	0.529447	0.172057	-0.30266
Aldoc	0.0445109	0.931534	0.722567	0.261274	-0.565774	-0.0674408	-0.156213	-0.654546
Clec3b	0.0232581	0.0347717	0.212951	0.734725	1.16003	1.38164	0.679514	0.457901
Ccdc80	0.0160123	0.0539234	0.0387152	0.393302	0.763712	1.14975	0.970002	0.583963
Azgp1	0.110254	0.760814	0.207569	0.978893	-0.380853	0.209541	0.55262	-0.0377737
Ppfia3	0.892258	0.704391	0.95201	0.838598	-0.0337055	0.137067	0.0318043	-0.138969
Dynlrb1	0.904267	0.888182	0.888843	0.957486	-0.0511228	0.12517	0.0861314	-0.0901615
Hephl1	0.143753	0.786552	0.38099	0.925898	0.346372	-0.247791	-0.443093	0.15107
Bzw1	0.795097	0.863666	0.762006	0.89564	-0.0654801	-0.0759926	0.102086	0.112599
Ahdc1	0.341212	0.978187	0.654798	0.941879	0.278081	0.023161	-0.165385	0.0895351
Ppp1r13l	0.551103	0.672476	0.457295	0.972875	-0.143571	0.165322	0.276667	-0.0322269
Dock8	0.17162	0.976398	0.23861	0.959637	-0.297489	0.0278855	0.389659	0.0642843
Rora	0.530954	0.983272	0.974725	0.913524	-0.152254	-0.0156487	0.0144502	-0.122155
Hal	0.114621	0.688544	0.00320192	0.063575	0.390746	-0.187422	-1.4277	-0.849534
Abca12	0.411377	0.456627	0.894806	0.962638	-0.22644	-0.366725	-0.0779146	0.0623695
Vwf	0.833565	0.62461	0.872576	0.856969	0.0816507	-0.244988	-0.137621	0.189018
Scel	0.247216	0.790574	0.952762	0.852701	-0.281851	-0.110164	0.0373196	-0.134368
Rpl3	0.145648	0.545199	0.800755	0.89564	-0.295219	-0.277271	0.13688	0.118933
Gys1	0.506747	0.22472	0.389853	0.394401	0.317548	-1.88207	-0.729008	1.47061
Syne1	0.47236	0.940349	0.623617	0.943234	-0.143502	-0.0485622	0.161839	0.0668993
Nfix	0.978209	0.909348	0.965485	0.926444	-0.00843992	0.105901	-0.0248711	-0.139212
Chad	0.014945	0.00612997	0.946059	0.339136	1.71792	1.2879	0.104444	0.534461
Scara5	0.0276613	0.220326	0.918637	0.898241	0.704761	0.799228	-0.074088	-0.168554
Ammecr1	0.944968	0.413734	0.943997	0.771063	-0.0284103	-0.379252	-0.055386	0.295456
Sec14l2	0.401731	0.994328	0.607413	0.692875	-0.245769	0.00563731	-0.209339	-0.460746
Trex2	0.900266	0.404172	0.266078	0.86634	-0.0346993	-0.696229	-0.360781	0.300748
Dmkn	0.121461	0.3148	0.89091	0.967761	0.577279	0.44747	-0.0674914	0.0623169
Klf4	0.159514	0.347144	0.626032	0.292724	-0.305176	0.433213	0.175011	-0.563377
Scin	0.0429806	0.601559	0.906907	0.81498	-0.455865	-0.215624	0.0505253	-0.189716
Gsn	0.0354599	0.891165	0.901394	0.582123	-0.477095	-0.0781226	0.0475812	-0.351391
Rpl10a	0.878027	0.969663	0.872442	0.910209	0.0442492	0.0285144	0.094953	0.110688
Dpt	0.443	0.280578	0.824174	0.588559	-0.208138	-0.465381	0.118938	0.376181
Itpr3	0.431424	0.682651	0.664575	0.809215	-0.173625	-0.158185	-0.172423	-0.187863
Rpl7	0.620333	0.601764	0.979313	0.938712	-0.161879	-0.229086	0.0156385	0.0828459
Pgd	0.574645	0.940349	0.800755	0.970761	-0.12773	-0.071535	0.111534	0.0553392
Cnn2	0.228818	0.301635	0.894058	0.986134	-0.317153	-0.401607	-0.0652753	0.0191788
Lcn2	0.905441	0.502827	0.538693	0.256606	0.166279	-2.56915	1.60218	4.33761
Itsn2	0.289942	0.371637	0.335294	0.754247	-0.232111	0.296721	0.296016	-0.232816
Aak1	0.558395	0.394272	0.489858	0.734716	-0.133566	0.400743	0.223549	-0.310761
Clic4	0.578277	0.671479	0.75761	0.829592	-0.188999	0.315369	0.184325	-0.320044
Tmprss4	0.369931	0.352315	0.151319	0.876772	0.159249	-0.566139	-0.526898	0.19849
Actn1	0.47826	0.323829	0.984717	0.736811	-0.244388	-0.733248	-0.0110731	0.477787
Sfxn3	0.383055	0.820376	0.982046	0.732943	-0.155804	0.115526	0.0076458	-0.263685
Gatm	0.957973	0.490171	0.900105	0.789919	-0.0271117	0.509667	0.0896918	-0.447087
Col4a1	0.0784773	0.999961	0.686453	0.672919	0.581936	-0.000207141	-0.227932	0.354211
Col4a2	0.00674611	0.963374	0.662221	0.165606	0.871105	0.0337792	-0.201277	0.636049
Cobl	0.75956	0.426543	0.389853	0.891606	-0.0869507	-0.359599	-0.411446	-0.138798
Itga7	0.416255	0.622868	0.614954	0.820624	0.231693	-0.320568	-0.273618	0.278642
Kpna2	0.202659	0.450396	0.207569	0.852093	-0.304773	0.324585	0.444849	-0.184509
Tmprss11d	0.0671376	0.494418	0.658793	0.967761	-0.802986	-0.397156	0.341544	-0.0642863
Stat3	0.845278	0.628728	0.479307	0.967559	-0.0440942	0.239765	0.232116	-0.0517432
Fmo1	0.979262	0.494781	0.530706	0.963227	0.0127741	-0.334154	-0.416109	-0.0691809
Rxra	0.554348	0.960469	0.788941	0.791493	-0.110364	-0.029092	-0.104362	-0.185633
Atp2a2	0.0954252	0.806857	0.803345	0.913524	-0.3091	-0.122686	0.0852633	-0.10115
Pygl	0.550961	0.809319	0.917335	0.949289	-0.11759	-0.132891	0.0481711	0.0634715
Slc29a1	0.905842	0.978187	0.863868	0.937619	0.0563593	0.0371529	-0.155239	-0.136033
Rap2a	0.424678	0.844979	0.488922	0.861581	0.20379	0.140473	-0.278394	-0.215076
Rap2b	0.0987711	0.780706	0.534318	0.702961	-0.340385	-0.169637	-0.178587	-0.349335
IL36RN	0.207399	0.627109	0.680178	0.91545	-0.271844	-0.199152	0.170631	0.0979393
Edem3	0.0562485	0.568506	0.870245	0.813795	0.489403	0.219337	-0.0841267	0.185939
Shc1	0.341874	0.955491	0.757286	0.999629	-0.165338	-0.0361149	0.12669	-0.0025329
Rbp1	0.05825	0.715876	0.811587	0.389054	0.858625	0.176161	-0.238363	0.444101
Ckap4	0.0215108	0.0132623	0.485207	0.935925	0.64224	0.859245	0.278684	0.0616792
Gpt	0.735329	0.955989	0.774339	0.88411	-0.0718431	-0.0341979	-0.0948956	-0.132541
Lrp4	0.919778	0.681917	0.5236	0.970818	0.0349096	-0.189618	-0.268219	-0.0436915
Crabp2	0.0157691	0.0715055	0.281996	0.590636	-0.75567	-0.850539	-0.465231	-0.370363
Inpp5a	0.527763	0.960469	0.939446	0.921837	0.156388	0.0497192	0.037966	0.144635
Serpinb11	0.121105	0.244102	0.792144	0.88411	-0.566284	-0.583965	0.172242	0.189923
Cyp2w1	0.556622	0.764811	0.876088	0.972829	0.365115	0.283327	-0.16433	-0.0825424
Eif5	0.918593	0.9817	0.697729	0.924692	-0.0243806	0.0137385	0.127085	0.0889662
Islr	0.0444261	0.781227	0.692242	0.93266	0.765403	0.299511	-0.306008	0.159885
Gpc1	0.895965	0.859144	0.605257	0.943234	-0.0606082	0.111735	0.266917	0.094574
Mast4	0.794565	0.634871	0.927849	0.896914	-0.0880761	-0.180472	0.0459714	0.138367
Klc3	0.888687	0.490171	0.495932	0.963221	0.049006	0.379317	0.259242	-0.0710691
Epn2	0.0847312	0.255312	0.863201	0.935124	0.581168	0.539567	0.0682988	0.109899
Nefl	0.730446	0.352315	0.641306	0.777323	-0.130434	-0.845139	-0.202439	0.512266
Mme	0.542602	0.0733145	0.151319	0.956455	0.293084	-0.796701	-1.0111	0.0786833
Sh3rf2	0.67628	0.764374	0.781675	0.875195	-0.167942	-0.184011	0.195739	0.211808
Hmox1	0.196533	0.6194	0.879023	0.794407	0.748357	0.330152	0.0832077	0.501413
Spag1	0.974325	0.854334	0.604789	0.876772	-0.0110715	-0.0950712	-0.241195	-0.157195
Dlg2	0.634588	0.891165	0.62992	0.987	-0.151539	0.0740951	0.244543	0.0189088
Ehbp1l1	0.998531	0.779538	0.824174	0.949489	0.00078735	0.225759	0.12352	-0.101452
Tgm3	0.0339789	0.528898	0.359374	0.901692	-0.594447	-0.485669	0.31213	0.203351
Ptpn3	0.888109	0.871646	0.999722	0.884783	-0.0558136	0.100529	0.000253567	-0.156089
Alox12b	0.492896	0.506924	0.722357	0.98277	-0.210031	-0.473536	-0.228184	0.0353207
Tacc2	0.263889	0.971096	0.734108	0.925898	-0.20611	0.0297338	0.137873	-0.09797
Flg2	0.355851	0.323829	0.0476329	0.980165	0.571291	-0.506194	-1.02335	0.054131
Pam	0.817031	0.867516	0.923759	0.924003	-0.0782357	0.133667	0.0795627	-0.13234
Clca2	0.152353	0.377908	0.974725	0.924595	-0.344133	-0.475052	-0.0215344	0.109384
Moxd1	0.398565	0.35564	0.823946	0.76801	-0.192727	-0.307393	0.0986809	0.213347
Mphosph6	0.544818	0.699845	0.962784	0.972829	-0.171331	-0.155961	-0.0225313	-0.0379013
Cpa4	0.569183	0.295433	0.605261	0.896428	-0.194405	-0.711907	-0.327805	0.189697
Cyb5r3	0.0752185	0.708755	0.772578	0.856729	-0.382683	-0.13994	0.091898	-0.150845
Mcam	0.813846	0.995146	0.873275	0.999629	0.0726679	-0.00480512	-0.0849922	-0.00751913
Elovl6	0.203612	0.555519	0.421198	0.49738	0.586341	0.508183	0.679064	0.757222
Bmp2k	0.194164	0.94422	0.612746	0.879166	-0.315121	0.0613851	0.170195	-0.206311
Alcam	0.629133	0.302009	0.945246	0.190936	-0.109243	0.487663	-0.0382078	-0.635114
Idh3a	0.958053	0.538504	0.776089	0.625847	-0.0124001	-0.225133	0.092158	0.304891
Rpl4	0.911155	0.862452	0.962784	0.933629	-0.031177	-0.0884863	0.021949	0.0792583
Fn1	0.902703	0.30439	0.720265	0.792832	0.0446258	0.474782	0.139543	-0.290613
Sparc	0.00273709	0.0194604	0.505601	0.485308	2.02286	1.85633	0.524933	0.691463
Prdm1	0.881751	0.825758	0.59079	0.965957	-0.0495678	0.516283	0.369003	-0.196848
Micall1	0.152265	0.587722	0.824174	0.771338	0.346294	0.216352	0.101302	0.231244
Sdc4	0.014945	0.626759	0.910782	0.545711	-0.800801	-0.346157	-0.0865112	-0.541156
Cryab	0.0450634	0.138249	0.284149	0.0813925	1.33839	-2.56956	-1.17129	2.73666
Rrm2	0.0509228	0.972072	0.698986	0.881594	-0.506754	-0.0515585	0.18198	-0.273216
Tppp	0.73335	0.217901	0.727762	0.430628	-0.126077	0.651955	0.184985	-0.593047
Vcan	0.0198211	0.886138	0.309564	0.582123	-0.708036	0.0852631	0.431424	-0.361875
Rps5	0.17373	0.493371	0.727762	0.999629	0.239633	0.348216	0.11508	0.00649738
Rai14	0.57328	0.783963	0.483476	0.767386	0.1208	0.121857	-0.222361	-0.223417
Eml2	0.168925	0.650019	0.95201	0.925898	-0.26635	-0.160431	0.025734	-0.0801847
Fmnl2	0.390478	0.450396	0.992867	0.884783	0.155066	0.284496	0.00346522	-0.125966
Rpl8	0.337602	0.471353	0.732319	0.884783	-0.265828	-0.228243	0.169469	0.131884
Pld4	0.730893	0.916852	0.927083	0.809215	-0.197249	0.0915546	-0.0965195	-0.385323
Ppp4r1	0.638644	0.867516	0.417055	0.754247	0.07876	0.0781085	0.204152	0.204804
Krt77	0.787761	0.622944	0.970881	0.858385	-0.121313	-0.31468	0.0385977	0.231964
Ephx2	0.62506	0.465235	0.605261	0.230764	0.179744	0.565758	-0.465456	-0.85147
Slc15a1	0.618472	0.534715	0.876088	0.970788	-0.137937	-0.286529	-0.109126	0.0394657
Gda	0.396317	0.93686	0.790543	0.988224	-0.285653	-0.0681603	0.194618	-0.0228747
Emilin1	0.497577	0.531193	0.939446	0.905317	0.235343	0.302128	-0.0690718	-0.135857
Sfxn1	0.81539	0.682215	0.605261	0.954683	0.0508797	0.143989	0.142095	0.0489853
Asap2	0.145648	0.979392	0.619335	0.890491	-0.604775	0.0466371	0.312175	-0.339237
Fabp5	0.0423042	0.488606	0.612746	0.942969	-0.750096	-0.59463	0.284482	0.129016
Aldh3a2	0.561609	0.564143	0.811587	0.757242	0.0972451	0.23201	-0.0832293	-0.217994
Carhsp1	0.151393	0.709894	0.960255	0.866372	0.498276	0.23519	-0.0376201	0.225465
Cat	0.99988	0.81659	0.477658	0.663684	3.21926e-05	0.121448	-0.220676	-0.342092
Acadsb	0.57275	0.827696	0.762006	0.884783	-0.129788	-0.109378	-0.121051	-0.141461
Crip2	0.110254	0.818232	0.471208	0.791493	-0.606225	0.157922	0.453691	-0.310456
Jmy	0.621657	0.329211	0.819345	0.545711	-0.14144	0.332621	0.121178	-0.352883
Dnajb2	0.321957	0.632939	0.771901	0.668548	-0.240649	0.172981	0.140957	-0.272672
Tle3	0.571116	0.580007	0.694189	0.936047	-0.122864	-0.226019	-0.171198	-0.0680434
Dtx3l	0.850209	0.322063	0.993432	0.563185	-0.074928	-0.562334	0.00667202	0.494078
Ptprg	0.243909	0.86756	0.38099	0.909468	0.34642	-0.108043	-0.305414	0.149049
Zdhhc13	0.0901985	0.985759	0.509771	0.967761	-0.399411	-0.016084	0.331386	-0.0519409
Polr3g	0.809603	0.55195	0.943997	0.900208	-0.10217	-0.329731	-0.0619523	0.165609
Fchsd1	0.0668561	0.656252	0.388147	0.927953	-0.542024	-0.259292	0.398148	0.115415
Sh3glb2	0.254028	0.459274	0.923759	0.979766	0.277523	0.255895	-0.0468642	-0.025237
Lrrc59	0.0643629	0.200935	0.434511	0.925898	0.493709	0.717023	0.339521	0.116207
Lamc3	0.62022	0.99239	0.650796	0.978893	-0.244782	-0.0140972	0.290639	0.0599543
Sntb1	0.978209	0.729904	0.755383	0.941785	0.00973619	-0.163798	-0.228902	-0.0553675
Slc7a5	0.0723776	0.401072	0.940408	0.96311	-0.659615	-0.515107	0.075231	-0.069277
Nup210	0.515807	0.979424	0.777012	0.646391	-0.215363	-0.0245508	-0.209736	-0.400548
Abhd11	0.16477	0.35564	0.671778	0.646391	0.567057	0.346225	0.222655	0.443486
Cndp2	0.262769	0.931181	0.73581	0.976761	-0.219046	-0.0583858	0.126906	-0.0337545
Rpl37a	0.546737	0.711726	0.833119	0.926829	-0.206665	-0.211706	0.124183	0.129224
Ldlr	0.537398	0.431834	0.577764	0.794407	0.134734	-0.298173	-0.239938	0.192969
Gas1	0.862334	0.809743	0.793946	0.89564	-0.118099	-0.127881	0.221107	0.230889
Nlrx1	0.938533	0.894903	0.688327	0.754247	0.0150371	-0.0677961	0.130092	0.212925
Gk	0.0668561	0.737607	0.790543	0.838598	-0.36136	-0.121732	0.0997518	-0.139876
Col1a2	0.00294759	0.0062647	0.495932	0.0324774	2.05668	1.68398	0.663517	1.03622
Nampt	0.804095	0.835875	0.979313	0.866372	0.0581524	-0.129788	-0.0111258	0.176815
Phyhip	0.178479	0.35564	0.755497	0.981539	-0.403728	-0.546684	-0.175877	-0.0329209
Unc13d	0.362292	0.979392	0.930778	0.795859	-0.531584	-0.0245889	0.112531	-0.394464
Plekha1	0.415717	0.891415	0.96359	0.898889	-0.203167	-0.0674666	0.0274003	-0.1083
Lgals7	0.104163	0.573167	0.646921	0.93266	-0.364605	-0.285575	0.174777	0.0957469
Irf6	0.3314	0.825614	0.925404	0.967761	-0.198047	-0.110123	0.0447854	-0.0431387
Slc7a1	0.603175	0.926981	0.5236	0.937619	-0.224292	0.155078	0.56248	0.18311
Plbd1	0.966289	0.581111	0.399364	0.967559	0.0119047	-0.351642	-0.296941	0.0666051
Sptlc2	0.502428	0.967634	0.688327	0.510014	0.150028	-0.0254341	0.170239	0.345702
Cfh	0.0623625	0.981514	0.409443	0.924692	-0.405344	-0.0303738	0.520471	0.145501
Hrnr	0.162519	0.557183	0.806535	0.844878	-0.399506	-0.630745	0.165932	0.39717
Fbln5	0.208432	0.966052	0.35992	0.896391	0.548115	0.0294999	-0.321536	0.19708
Gstm5	0.729056	0.981231	0.859011	0.970818	0.0982595	0.0151753	-0.116758	-0.0336734
Pof1b	0.558724	0.969605	0.8013	0.720066	-0.127123	0.0285177	-0.120738	-0.276378
Rpl12	0.484647	0.942241	0.794079	0.941785	-0.152772	0.071834	0.125113	-0.0994924
Flot2	0.930142	0.822182	0.979313	0.90766	0.0264433	0.175738	-0.0139298	-0.163225
Apoe	0.259223	0.130912	0.409641	0.896391	0.249007	0.805933	0.43559	-0.121336
Hspa2	0.117171	0.449963	0.800755	0.216384	-0.299133	0.25174	0.102823	-0.44805
Rps4x	0.515839	0.535195	0.932427	0.91545	-0.186821	-0.238992	0.0548828	0.107054
Serpina12	0.111128	0.301635	0.992621	0.978893	-0.523069	-0.497587	-0.00699581	-0.0324773
Col5a1	0.0129636	0.0566058	0.347097	0.03586	1.33024	1.0018	0.750384	1.07882
Nt5c2	0.450535	0.877934	0.815341	0.864842	0.171104	-0.0864597	-0.0880397	0.169524
Gas6	0.126445	0.638409	0.811587	0.324377	-0.428085	-0.187678	-0.164174	-0.404581
Ncs1	0.630579	0.980393	0.988271	0.89564	0.298085	-0.0353237	-0.00978077	0.323628
Rras	0.964384	0.67056	0.652557	0.935925	0.0149015	-0.363396	-0.238174	0.140124
Aadac	0.191611	0.911325	0.823946	0.788456	0.639629	0.0840148	-0.23849	0.317125
Itgb5	0.720888	0.928194	0.922408	0.985561	-0.120769	-0.0561822	0.0832841	0.018697
Prss27	0.530954	0.200935	0.722357	0.715093	-0.272438	-1.14727	-0.341046	0.533789
Cdh13	0.0308766	0.426215	0.092029	0.717463	-0.563806	-0.387161	0.513572	0.336927
Pglyrp4	0.111018	0.832466	0.333327	0.00969697	-0.496584	0.131989	-0.610754	-1.23933
Pla2g4e	0.987058	0.799639	0.100379	0.216384	0.0068839	0.165394	0.952469	0.793959
Rhob	0.324403	0.621457	0.807004	0.638825	-0.363237	0.171333	0.157158	-0.377413
Ttl	0.552851	0.760814	0.941788	0.976761	-0.139434	-0.168377	-0.0590568	-0.0301146
Aldh3b2	0.216758	0.350715	0.96359	0.935386	-0.275196	-0.376798	-0.0243502	0.0772511
Rapgefl1	0.772769	0.728723	0.84337	0.856969	0.102561	0.211506	-0.123522	-0.232467
Ptprc	0.0354599	0.362631	0.918918	0.879166	-0.840058	-0.540245	0.0636122	-0.236201
Ephx3	0.918075	0.801581	0.757357	0.771829	-0.0640398	-0.260719	0.293761	0.490441
Tom1l2	0.83451	0.994328	0.894678	0.900208	-0.0620853	0.00563718	-0.0599298	-0.127652
Pdlim4	0.901407	0.504724	0.380976	0.927953	-0.0569452	0.386315	0.291728	-0.151532
Pgrmc2	0.943996	0.744132	0.967216	0.884783	-0.0205939	0.124137	0.023506	-0.121225
Ano1	0.261612	0.784056	0.922469	0.979766	-0.296681	-0.194768	0.0659003	-0.0360129
Cldn4	0.17069	0.610536	0.930628	0.89564	-0.344062	-0.247133	-0.0511376	-0.148067
Erp29	0.144116	0.242047	0.863201	0.913524	0.37116	0.574074	0.0707267	-0.132188
Smpd3	0.694995	0.384401	0.735124	0.946366	-0.16189	-0.400212	-0.303104	-0.0647811
Acat1	0.985861	0.943932	0.807004	0.86919	-0.0034336	0.0341122	-0.0804221	-0.117968
Col3a1	0.000800978	0.00612997	0.359374	0.231524	2.77337	2.65539	0.747451	0.865425
Eef1a1	0.503721	0.953589	0.813093	0.983422	-0.26949	-0.0597092	0.175159	-0.0346218
Uba6	0.969258	0.840416	0.80517	0.979766	0.0101842	0.0803273	0.0921323	0.0219892
Sema4b	0.766111	0.920591	0.72574	0.832277	-0.075373	0.0904588	-0.1115	-0.277332
Sod1	0.835605	0.843228	0.719886	0.999629	0.0585203	-0.101329	-0.154387	0.00546285
Slfn5	0.764805	0.894903	0.967216	0.849253	-0.133521	0.0992454	-0.0365649	-0.269331
Cadm3	0.607467	0.905685	0.608917	0.967559	0.201401	-0.102914	-0.373334	-0.069019
Them5	0.527763	0.911898	0.704989	0.966059	-0.238849	-0.109528	0.214182	0.0848609
Afap1l2	0.902881	0.750368	0.986907	0.836887	-0.0397297	0.125186	0.00940637	-0.155509
Psapl1	0.348753	0.932526	0.759099	0.970761	0.291379	0.0905969	-0.133076	0.0677064
Apod	0.166956	0.159514	0.884752	0.754247	-0.51792	-1.02232	-0.171488	0.33291
Rps6	0.435677	0.801399	0.751102	0.971824	-0.222471	-0.156452	0.115872	0.049853
Ephx1	0.0182793	0.836082	0.605261	0.736811	-0.507093	-0.100203	0.184261	-0.222629
Mmp2	0.0130677	0.894903	0.838513	0.0891767	0.879145	0.0706626	-0.129219	0.679263
Cab39l	0.4117	0.372366	0.727762	0.935925	0.222404	0.329701	0.182383	0.075086
Arl8a	0.0500237	0.922774	0.60511	0.767386	-0.75377	-0.0798605	0.365486	-0.308423
Rps19	0.206139	0.435518	0.560964	0.970693	0.379438	0.499268	0.185075	0.0652454
Taok1	0.17373	0.947666	0.931878	0.794407	-0.331009	-0.0454033	0.0509321	-0.234673
Mapre2	0.103077	0.982326	0.752479	0.771798	-0.317621	0.013854	0.114744	-0.216731
Ckb	0.926423	0.659075	0.675792	0.992097	0.0438505	0.352693	0.282105	-0.0267379
Serpinb13	0.0853009	0.576052	0.530059	0.0532682	-0.469789	0.271104	-0.250309	-0.991202
F3	0.0926647	0.66873	0.675792	0.0955587	-0.519222	-0.163323	-0.258583	-0.614482
Rps27	0.00601126	0.35826	0.718393	0.801759	-0.927755	-0.478127	0.212453	-0.237175
Irak3	0.158301	0.642151	0.802918	0.97673	-0.40127	-0.26631	0.174007	0.0390465
Cachd1	0.671492	0.878252	0.759128	0.925617	0.149698	-0.119904	-0.116845	0.152757
Dsc2	0.0630351	0.56089	0.128893	0.514524	-0.50965	-0.379778	0.677056	0.547184
Trappc6a	0.995307	0.605304	0.60902	0.926829	-0.00371363	-0.630371	-0.355864	0.270793
Map3k5	0.34654	0.702584	0.958776	0.93266	-0.243964	-0.181766	-0.02843	-0.0906273
Eif3l	0.76658	0.969917	0.872576	0.96311	-0.0572027	-0.0246138	0.0747212	0.0421322
Rps15	0.180343	0.394594	0.930973	0.958341	-0.348573	-0.347676	0.0558625	0.054965
Znf652	0.864943	0.331014	0.745028	0.736414	0.0655706	-0.461213	-0.217953	0.308831
Abhd6	0.246435	0.917895	0.959137	0.771063	-0.311194	-0.0615467	0.0392233	-0.210424
Ctsl	0.0353573	0.295433	0.574764	0.988224	-0.473683	-0.701563	-0.251643	-0.0237638
Thy1	0.356313	0.140829	0.974254	0.407407	0.274204	0.867267	-0.0184839	-0.611547
Nt5c3a	0.763142	0.601764	0.948076	0.738477	0.0749017	-0.280786	-0.0315905	0.324097
Ctsc	0.207971	0.961179	0.530059	0.90766	-0.363943	0.0415057	0.253957	-0.151493
Clock	0.261612	0.347144	0.485373	0.787271	-0.385294	-0.396595	0.294676	0.305977
Nmnat3	0.0689269	0.982041	0.421198	0.794407	0.630108	-0.0235467	-0.286739	0.366916
Sdcbp2	0.220846	0.238714	0.465119	0.9938	-0.329798	-0.683703	-0.369919	-0.0160148
Igkc	0.0150939	0.135933	0.732319	0.985132	-1.86516	-2.14232	-0.34304	-0.0658815
Acer1	0.251497	0.987713	0.641306	0.884783	-0.953273	0.0161346	0.632075	-0.337333
Csf2rb	0.123475	0.809533	0.855108	0.896391	-0.67844	-0.245398	0.210859	-0.222183
Mxra7	0.47239	0.627127	0.960847	0.567649	-0.568792	0.844704	-0.0719851	-1.48548
Rps20	0.67804	0.978187	0.818771	0.979766	-0.12054	-0.0240413	0.128395	0.0318955
Dgat2	0.816908	0.502827	0.888843	0.913524	-0.0808863	-0.295014	-0.0882757	0.125852
Olfml2b	0.640854	0.695357	0.463666	0.941785	-0.207609	0.242985	0.330031	-0.120563
Fap	0.0667766	0.517917	0.811587	0.999629	0.744261	0.530922	-0.214914	-0.00157515
F10	0.176064	0.79784	0.843977	0.93266	-0.46937	-0.180187	0.197661	-0.0915229
Rpl27	0.894212	0.886138	0.894806	0.926829	-0.0471549	-0.0744949	0.0731233	0.100463
Cdh3	0.287928	0.762122	0.605257	0.869999	-0.243697	-0.262477	0.235188	0.253968
Rbm47	0.699998	0.982364	0.61221	0.972875	-0.0936574	0.0227608	0.167696	0.0512774
Gpnmb	0.499865	0.641793	0.891563	0.89564	0.469192	0.51678	0.297074	0.249487
Ahr	0.757142	0.980797	0.912091	0.857848	-0.120332	0.0257235	-0.10044	-0.246496
Flrt3	0.890862	0.93504	0.83218	0.93266	0.0890685	0.114698	0.220626	0.194996
Rpl13	0.722345	0.69726	0.843381	0.840974	-0.101669	-0.207381	0.106639	0.212351
Stom	0.345678	0.82627	0.96359	0.970761	-0.188329	-0.158962	-0.0212355	-0.050602
Ralgps2	0.121857	0.436466	0.870245	0.979766	-0.51731	-0.354202	0.13416	-0.0289476
Eml6	0.923459	0.671479	0.932126	0.794407	-0.0279501	-0.297724	0.0550452	0.324819
Hsd11b1	0.388776	0.00127936	0.979239	0.000531064	-0.251158	-2.41421	-0.0145139	2.14854
Degs1	0.0307037	0.542137	0.978022	0.423113	-0.91603	-0.334626	0.0236157	-0.557788
Hells	0.488148	0.950088	0.806535	0.844757	-0.756324	0.0534825	0.146013	-0.663793
Cnnm4	0.593886	0.709366	0.50727	0.918716	-0.142479	-0.241468	-0.248799	-0.149811
Emb	0.0592497	0.801399	0.893069	0.124257	0.602916	-0.102963	-0.0871077	0.618772
Gpcpd1	0.738162	0.953514	0.760266	0.989311	0.139172	-0.0504012	-0.211888	-0.022315
Lima1	0.182902	0.697272	0.956224	0.507274	-0.2659	0.204058	0.0197298	-0.450228
Eef1a2	0.121857	0.3148	0.641306	0.194795	1.41419	-1.87385	-0.959866	2.32818
Rab31	0.502739	0.701451	0.930628	0.970674	-0.220134	-0.262244	-0.0937378	-0.0516282
Parp9	0.222213	0.927368	0.643153	0.510014	-0.321023	0.0794602	-0.161857	-0.56234
Ctsb	0.866795	0.71582	0.612746	0.979766	-0.0471598	0.189458	0.263729	0.0271106
Dnajc5	0.355851	0.902108	0.916111	0.799847	-0.223577	0.0855492	0.0626918	-0.246435
Lgals3	0.468361	0.940275	0.544376	0.967761	-0.211581	-0.069805	0.212897	0.0711212
Ubtd1	0.620333	0.979523	0.868107	0.992729	0.129372	0.0162448	-0.100696	0.0124314
Nmi	0.569723	0.422309	0.5825	0.900208	-0.210371	-0.324079	-0.27017	-0.156462
Dicer1	0.408795	0.938572	0.862105	0.880765	-0.190971	0.0491399	0.0903847	-0.149726
Frmd8	0.301807	0.737417	0.62992	0.779523	-0.196199	-0.148983	-0.168174	-0.21539
Ivl	0.121857	0.710148	0.732713	0.942417	0.532847	0.270702	-0.146386	0.115759
Lrrc15	0.376298	0.40533	0.566473	0.736811	0.499268	-0.396168	-0.385756	0.50968
Qpct	0.0745074	0.0646369	0.388147	0.961614	0.592663	0.984602	0.455971	0.0640319
Vps26b	0.860897	0.749116	0.886877	0.98065	-0.04688	-0.119346	-0.0503275	0.0221384
Acp5	0.163648	0.333084	0.824174	0.835757	-0.44059	-0.529889	0.151423	0.240721
Hdac5	0.520619	0.81722	0.463303	0.909349	0.365387	0.264349	-0.409221	-0.308183
Isg15	0.252958	0.388557	0.649142	0.50496	-0.952277	0.613675	0.775798	-0.790154
Fads1	0.110254	0.133668	0.945887	0.924692	0.796091	0.845113	-0.0873864	-0.136408
Nab2	0.97035	0.792235	0.803345	0.930692	-0.021198	-0.166858	-0.261029	-0.11537
Slc6a14	0.0208944	0.106524	0.689502	0.594217	-0.736357	-0.59944	-0.187862	-0.324779
Gm2a	0.65888	0.743918	0.916324	0.813795	0.193518	-0.291783	-0.0754177	0.409883
Sod3	0.941999	0.907069	0.301371	0.783486	0.0266267	0.0934947	0.398699	0.331831
Il36g	0.327673	0.366793	0.953024	0.972829	-0.423584	-0.445349	-0.0645746	-0.0428094
Tgfbr3	0.744231	0.999592	0.96359	0.96232	0.125449	-0.00085593	-0.0334892	0.0928159
Fbxo30	0.231246	0.994328	0.521787	0.984376	-0.520841	0.00591121	0.497071	-0.0296809
Ptpn21	0.813816	0.843228	0.723102	0.804842	-0.140413	-0.166812	-0.36658	-0.340181
Lrrc20	0.755949	0.870081	0.569809	0.694789	0.157064	-0.142596	0.27385	0.57351
Kdsr	0.786179	0.981514	0.716509	0.999629	0.1364	-0.0261328	-0.161168	0.00136416
Rpl15	0.465362	0.875494	0.790543	0.967559	-0.158874	-0.0808589	0.121068	0.0430522
Ankh	0.806091	0.878252	0.859193	0.835757	-0.115791	0.143126	-0.106679	-0.365597
Yes1	0.139904	0.590506	0.922609	0.999629	0.336123	0.283877	-0.054309	-0.00206352
Cadm4	0.569251	0.806489	0.603612	0.937471	0.179452	-0.315184	-0.323038	0.171599
Cd47	0.999416	0.867516	0.62992	0.937471	-0.000356035	-0.107971	-0.193972	-0.0863565
Upp1	0.110254	0.372366	0.904006	0.980921	-0.870516	-0.721504	0.184172	0.0351609
Slc28a3	0.0384799	0.247867	0.999434	0.821803	-0.705541	-0.490822	0.00120491	-0.213514
Rftn1	0.584063	0.332054	0.945133	0.240048	-0.161827	0.427175	-0.0459504	-0.634953
Gdpd2	0.901283	0.48395	0.795778	0.343299	0.0448139	-0.402391	0.175102	0.622307
Ston2	0.126345	0.331697	0.99879	0.956944	-0.36424	-0.423294	-0.00142029	0.0576331
Lypd5	0.418912	0.882436	0.999722	0.913524	-0.398757	-0.163662	0.00096978	-0.234125
Angptl7	0.0182793	0.0256377	0.668898	0.534417	-1.2934	-2.57711	-0.391352	0.892356
Col5a2	0.00484867	0.0325212	0.549415	0.132481	1.31658	1.0123	0.385111	0.68939
Gjb4	0.470076	0.656622	0.530706	0.754247	-0.44327	-0.474864	-0.66505	-0.633456
Plek	0.122347	0.621457	0.863868	0.857848	-0.885595	-0.37093	0.159734	-0.354931
Agfg2	0.82017	0.941662	0.855181	0.933629	-0.0966706	-0.108006	-0.179997	-0.168662
Rpl18	0.644094	0.744132	0.833127	0.84527	-0.166631	0.213637	0.108771	-0.271497
Ngef	0.114936	0.913103	0.983712	0.692875	-0.48906	-0.0994839	-0.0149962	-0.404572
Fbxo45	0.676696	0.785431	0.970881	0.938712	-0.167329	-0.121647	-0.0324695	-0.0781512
Dmtn	0.872089	0.541121	0.968331	0.751712	0.0829847	0.424444	-0.0464192	-0.387878
Cd81	0.32786	0.884547	0.891563	0.760705	-0.314798	0.0989071	0.0803696	-0.333335
Gjb5	0.863082	0.7012	0.538693	0.938712	0.0919597	-0.343512	-0.276201	0.159271
Dhfr	0.143876	0.926981	0.888843	0.802152	0.261797	0.0442234	-0.0596828	0.157891
Ugcg	0.816376	0.0952425	0.81499	0.494427	-0.131067	-0.918636	-0.256558	0.531012
Efna3	0.753628	0.994328	0.881939	0.917062	0.18118	0.0180429	0.147201	0.310338
Cldn1	0.362292	0.529725	0.745028	0.917587	-0.169153	-0.545478	-0.199208	0.177118
Rnd3	0.887282	0.614964	0.95201	0.851141	-0.0646999	0.198398	0.0393156	-0.223783
Galnt6	0.426958	0.813722	0.923759	0.892652	-0.384117	-0.221525	-0.101591	-0.264183
S100a9	0.836665	0.672638	0.288819	0.363822	0.303589	-1.947	2.2678	4.5184
Gjb3	0.0131954	0.439407	0.78929	0.765901	-0.877629	-0.622032	-0.170717	-0.426314
Mtch1	0.152353	0.908332	0.688327	0.967761	0.535948	0.144249	-0.301541	0.0901584
Tmem165	0.151393	0.95039	0.98844	0.798678	-0.397821	-0.0676791	-0.00746377	-0.337605
Srd5a3	0.334439	0.941662	0.956224	0.89564	-0.42408	-0.105879	0.0712274	-0.246973
Rpl30	0.446485	0.984688	0.720265	0.969982	-0.210717	0.0153112	0.175003	-0.0510248
Gjb6	0.720888	0.518959	0.796631	0.732943	-0.298958	-0.494678	0.403267	0.598988
Gjb2	0.980482	0.271556	0.98844	0.396888	0.0155589	-0.759986	0.0151702	0.790715
Ctnnbip1	0.465947	0.724484	0.930864	0.972875	0.331559	0.310553	-0.0888196	-0.0678138
Mfap5	0.0182393	0.00612997	0.281996	0.318689	-1.21654	-1.31356	-0.688235	-0.59122
Mpzl2	0.356114	0.397618	0.942947	0.948028	-0.361825	-0.534708	-0.0816829	0.0912007
Vmp1	0.681283	0.299624	0.806535	0.449527	0.16301	-0.671716	-0.198071	0.636655
Rpl35	0.864083	0.935258	0.830114	0.938712	0.0486952	0.0552751	0.0876567	0.0810768
Sprr1b	0.544818	0.946015	0.512335	0.857848	-0.350281	-0.0948303	0.631586	0.376136
Ptms	0.425506	0.981514	0.882219	0.725415	-0.38474	-0.0154661	-0.0986572	-0.467931
Calcrl	0.16477	0.971872	0.32651	0.926829	0.440839	0.064577	-0.608214	-0.231952
Pla2g2f	0.163217	0.939105	0.359374	0.902008	0.780365	-0.0925008	-0.601266	0.271599
Slc46a2	0.706905	0.350396	0.690384	0.754247	0.311639	-0.632542	-0.222839	0.721342
Bcl7c	0.830746	0.972072	0.870245	0.998738	-0.0877164	-0.0236655	0.0735368	0.00948583

## Sheet: Pustulosis_Non-Les vs. Control
Comparison DEGs of palmoplantar pustulosis with Skin data (doi.org/10.1016/j.jaci.2022.04.027, Non-lesional vs Control DEGs)											Proteins with age- and/or sex-dependent significances
	q value				Log2FC						q value ≤ 0.05
Gene Name	Skin_Fe4w/Fe14w	Skin_Ma4w/Ma14w	Skin_Ma4w/Fe4w	Skin_Ma14w/Fe14w	Skin_Fe4w/Fe14w	Skin_Ma4w/Ma14w	Skin_Ma4w/Fe4w	Skin_Ma14w/Fe14w
Lcp1	0.517744	0.97983	0.997248	0.88411	-0.251865	0.0326467	-0.00250387	-0.287016
Cd207	0.981855	0.0318613	0.0476329	0.00585686	0.00830037	0.973814	-0.694947	-1.66046
Hcls1	0.222028	0.909348	0.805489	0.76251	-0.414706	0.0920301	0.17648	-0.330256
Apob	0.0411167	0.246076	0.0605477	0.183239	0.444032	0.556621	0.705217	0.592628
Eif4a3	0.455671	0.978187	0.997529	0.835757	-0.140462	0.0165906	-0.00155898	-0.158612
Lyn	0.340787	0.978153	0.944573	0.89564	-0.23582	-0.0281113	0.0369104	-0.170798
Agt	0.26299	0.268083	0.892414	0.393638	0.411357	0.68487	-0.171009	-0.444522
C3	0.811408	0.720271	0.731416	0.332919	-0.102374	0.276282	-0.316454	-0.69511
Cotl1	0.383055	0.662087	0.987994	0.999629	-0.213311	-0.220384	-0.00591762	0.00115481
Itgb2	0.160877	0.478892	0.366119	0.856729	-0.690859	-0.783898	0.380186	0.473225
Serpinb6	0.511679	0.656622	0.803345	0.857848	-0.132989	-0.180185	0.101906	0.149102
Pdzk1ip1	0.273208	0.871646	0.663705	0.998973	-0.410652	-0.13622	0.264091	-0.0103418
Efhd2	0.52831	0.958951	0.861841	0.963221	-0.209279	-0.0430888	0.0967412	-0.0694486
Samhd1	0.0842338	0.967634	0.148984	0.979939	-0.357493	0.0474445	0.442038	0.0371005
Coro1a	0.339541	0.840606	0.969123	0.93266	-0.384912	-0.229687	-0.0265714	-0.181796
Slc5a1	0.0182793	0.193483	0.894058	0.762916	-0.975464	-0.73105	-0.090223	-0.334637
Krt6a	0.0027647	0.341644	0.0459288	0.654675	-1.38001	-1.68698	0.914651	1.22162
Csad	0.398886	0.400677	0.889903	0.783559	0.290483	0.425103	-0.129762	-0.264383
Pstk	0.815916	0.997591	0.945246	0.887881	-0.110107	0.00290443	-0.0805336	-0.193545
Qsox1	0.373208	0.531633	0.759128	0.789919	-0.258515	-0.219243	-0.173391	-0.212663
Ncf2	0.485732	0.622944	0.599544	0.815878	-0.259035	-0.35612	0.258259	0.355345
Clec10a	0.877786	0.347208	0.755383	0.857848	-0.0754269	-0.557286	-0.217262	0.264596
Gan	0.725162	0.673918	0.151319	0.640442	-0.121218	-0.180805	-0.46582	-0.406233
Apobr	0.62506	0.913253	0.95201	0.89564	-0.191696	0.197567	0.030259	-0.359004
Nol9	0.761723	0.978187	0.997248	0.926444	0.101625	-0.0260623	0.00252419	0.130212
Hephl1	0.143753	0.786552	0.38099	0.925898	0.346372	-0.247791	-0.443093	0.15107
Plek2	0.56711	0.915638	0.979239	0.941785	-0.176415	-0.085577	-0.0115043	-0.102343
Ptges	0.76054	0.784258	0.538693	0.984413	-0.202465	0.303916	0.558233	0.0518517
Dock2	0.217671	0.687614	0.865103	0.985889	-0.392705	-0.250724	0.11566	-0.0263204
Gfod1	0.906642	0.467002	0.619315	0.935925	0.0513457	-0.350283	-0.299453	0.102176
Nfkb2	0.80816	0.91506	0.96743	0.978893	0.0902705	0.0682951	0.0179553	0.0399308
Lysmd2	0.980636	0.977861	0.996518	0.978893	0.0126	-0.0537216	-0.00811125	0.0582104
Fermt3	0.183487	0.916544	0.974254	0.793652	-0.365033	-0.0765017	0.0192014	-0.26933
Gpt2	0.803069	0.438721	0.688327	0.838598	0.121835	-0.395793	-0.230282	0.287346
Trex2	0.900266	0.404172	0.266078	0.86634	-0.0346993	-0.696229	-0.360781	0.300748
Ptpn6	0.275613	0.77835	0.835639	0.510014	-0.196105	0.170458	-0.0796201	-0.446183
Scin	0.0429806	0.601559	0.906907	0.81498	-0.455865	-0.215624	0.0505253	-0.189716
Col7a1	0.282912	0.490171	0.992005	0.854037	-0.248552	-0.451137	0.00804647	0.210631
Cnn2	0.228818	0.301635	0.894058	0.986134	-0.317153	-0.401607	-0.0652753	0.0191788
Lcn2	0.905441	0.502827	0.538693	0.256606	0.166279	-2.56915	1.60218	4.33761
Tmprss4	0.369931	0.352315	0.151319	0.876772	0.159249	-0.566139	-0.526898	0.19849
Fmnl1	0.424678	0.376671	0.60511	0.640442	-0.304875	0.430213	0.236504	-0.498585
Prkcb	0.240633	0.965343	0.276952	0.961549	0.369248	0.0318381	-0.404638	-0.0672287
Myo1g	0.16477	0.750368	0.803345	0.534417	-0.6842	0.256983	0.150673	-0.79051
Gpx1	0.0752185	0.62948	0.845953	0.941785	-0.45461	-0.289156	0.0700691	-0.0953843
Rtn1	0.662382	0.819077	0.876088	0.836887	-0.10918	-0.209157	0.140905	0.240882
Cpa3	0.027958	0.270177	0.792144	0.857848	-0.804702	-0.798674	-0.229038	-0.235066
Rel	0.0431387	0.871646	0.956218	0.699317	-0.478982	-0.12269	-0.0237072	-0.379999
Stat3	0.845278	0.628728	0.479307	0.967559	-0.0440942	0.239765	0.232116	-0.0517432
Tpm1	0.891526	0.215575	0.441442	0.494427	0.093101	-2.18093	-0.835625	1.43841
Pan2	0.926007	0.886138	0.956218	0.926829	-0.027906	-0.178742	0.0352468	0.186083
Pygl	0.550961	0.809319	0.917335	0.949289	-0.11759	-0.132891	0.0481711	0.0634715
Nckap1l	0.21695	0.95913	0.646921	0.96232	-0.431994	-0.0434462	0.325696	-0.0628523
Cst3	0.0954252	0.58895	0.818908	0.93266	-0.702935	-0.420208	0.119428	-0.163298
Gpt	0.735329	0.955989	0.774339	0.88411	-0.0718431	-0.0341979	-0.0948956	-0.132541
Mvp	0.0943857	0.945834	0.779661	0.895152	-0.322411	-0.0582841	0.100065	-0.164062
Pex1	0.426958	0.385285	0.870245	0.925617	-0.469906	-0.495243	0.169206	0.194543
Plekho2	0.245546	0.402092	0.95201	0.999629	0.455106	0.405271	-0.0487023	0.00113288
Sh3rf2	0.67628	0.764374	0.781675	0.875195	-0.167942	-0.184011	0.195739	0.211808
Gnai2	0.34626	0.915805	0.612746	0.818572	-0.239257	-0.107744	-0.194502	-0.326015
S100b	0.816653	0.972072	0.731873	0.938777	0.237066	0.0674735	-0.413591	-0.243998
Pdcd4	0.724625	0.825758	0.580359	0.734725	0.0802265	0.0835545	-0.20539	-0.208718
Plin3	0.941294	0.730603	0.688327	0.731949	0.0197065	0.183261	-0.148534	-0.312089
Frem2	0.056381	0.215575	0.63536	0.928591	0.989576	0.545194	-0.31023	0.134153
Parvb	0.217115	0.958759	0.922609	0.926829	-0.380543	-0.0884693	0.0865271	-0.205547
Csf1r	0.840703	0.894567	0.98844	0.966825	-0.0622847	-0.10381	0.0108122	0.0523373
Il36a	0.11143	0.288591	0.639084	0.926829	-0.714321	-0.568163	0.29551	0.149352
Otop3	0.307362	0.958757	0.999722	0.857848	-0.442418	-0.0884764	-0.00131363	-0.355255
Lgmn	0.728395	0.985825	0.722267	0.940095	-0.103091	0.014	0.196873	0.0797828
Arhgdib	0.194098	0.768199	0.930628	0.943638	-0.41671	-0.327437	-0.0536436	-0.142917
Dok2	0.462323	0.601559	0.972643	0.472444	-0.402725	0.428429	-0.0348314	-0.865985
Dtx3l	0.850209	0.322063	0.993432	0.563185	-0.074928	-0.562334	0.00667202	0.494078
Lpin3	0.884105	0.572748	0.50376	0.967761	0.0416905	-0.289141	-0.27757	0.0532616
Tmprss13	0.813846	0.330744	0.960847	0.734725	-0.231378	-0.992283	-0.108992	0.651913
Fkbp11	0.00024357	0.00675908	0.284149	0.0926021	2.0567	1.65154	0.456797	0.861957
Rac2	0.978554	0.140829	0.945133	0.0883001	-0.013858	-1.25635	-0.101321	1.14117
Rhog	0.222563	0.971096	0.876013	0.905317	-0.255714	-0.0362266	0.0691973	-0.150291
Myo1f	0.654296	0.538504	0.755298	0.794739	-0.233341	-0.390936	0.241933	0.399528
Ca2	0.266113	0.925767	0.965807	0.278224	-0.781619	0.107932	0.0928986	-0.796653
Flot2	0.930142	0.822182	0.979313	0.90766	0.0264433	0.175738	-0.0139298	-0.163225
Alox15	0.268921	0.710148	0.608917	0.538575	-0.966414	-0.321343	-0.526254	-1.17132
Pla2g4e	0.987058	0.799639	0.100379	0.216384	0.0068839	0.165394	0.952469	0.793959
Aldh3b2	0.216758	0.350715	0.96359	0.935386	-0.275196	-0.376798	-0.0243502	0.0772511
Ptprc	0.0354599	0.362631	0.918918	0.879166	-0.840058	-0.540245	0.0636122	-0.236201
Ephx3	0.918075	0.801581	0.757357	0.771829	-0.0640398	-0.260719	0.293761	0.490441
Ptprj	0.562536	0.938917	0.875277	0.968154	-0.225995	-0.0627592	0.0966851	-0.0665512
Smpd3	0.694995	0.384401	0.735124	0.946366	-0.16189	-0.400212	-0.303104	-0.0647811
Ddx5	0.72819	0.994328	0.964724	0.947265	-0.0730638	0.00534404	0.0207514	-0.0576565
Afap1l2	0.902881	0.750368	0.986907	0.836887	-0.0397297	0.125186	0.00940637	-0.155509
Mapkapk3	0.908819	0.834233	0.972643	0.948028	-0.0343672	-0.112289	-0.0232742	0.0546478
Ddx47	0.747891	0.821157	0.979313	0.978893	-0.0835297	-0.127199	-0.0118966	0.0317732
Aox1	0.490199	0.329011	0.999722	0.658783	-0.238603	-0.619578	0.000140183	0.381114
Znf652	0.864943	0.331014	0.745028	0.736414	0.0655706	-0.461213	-0.217953	0.308831
Abhd6	0.246435	0.917895	0.959137	0.771063	-0.311194	-0.0615467	0.0392233	-0.210424
Ctsc	0.207971	0.961179	0.530059	0.90766	-0.363943	0.0415057	0.253957	-0.151493
Ctsz	0.987058	0.764374	0.927083	0.922527	-0.00857348	0.293534	0.101162	-0.200945
Cd48	0.408795	0.638409	0.922609	0.644439	-0.419437	0.327882	0.048225	-0.699093
Snrpa1	0.572078	0.930644	0.960975	0.912126	-0.11973	-0.0469302	-0.0229978	-0.0957975
Itgam	0.0697172	0.242047	0.389853	0.640442	-0.735197	-1.07338	0.3574	0.695582
C1qa	0.736462	0.221524	0.32626	0.511164	-0.16314	1.45217	0.558677	-1.05663
Rpl36a	0.947131	0.81722	0.865536	0.967761	-0.02945	0.136131	0.104494	-0.0610873
Igkc	0.0150939	0.135933	0.732319	0.985132	-1.86516	-2.14232	-0.34304	-0.0658815
Rab38	0.502428	0.431221	0.335294	0.978893	-0.196368	-0.473597	-0.32233	-0.0451019
Cdh3	0.287928	0.762122	0.605257	0.869999	-0.243697	-0.262477	0.235188	0.253968
Ca3	0.339236	0.404172	0.428336	0.734725	0.424724	-0.973294	-0.719116	0.678902
Ethe1	0.273532	0.852196	0.828572	0.967761	-0.289097	-0.125658	0.108563	-0.0548756
Engase	0.0031636	0.271556	0.675792	0.635446	1.08938	0.519047	-0.253285	0.317044
Ifitm3	0.981855	0.978187	0.983712	0.982002	-0.0106327	-0.0353237	0.0153543	0.0400452
Emb	0.0592497	0.801399	0.893069	0.124257	0.602916	-0.102963	-0.0871077	0.618772
Hypk	0.460308	0.984306	0.781675	0.943447	-0.439054	-0.028452	0.248766	-0.161836
Rgs10	0.262736	0.208193	0.861841	0.89564	0.619403	1.07631	0.123672	-0.333236
Ndufa11	0.733215	0.933749	0.910039	0.979766	-0.118013	-0.0857244	0.0764597	0.0441712
Rdh16	0.286925	0.916544	0.560741	0.902953	0.420308	-0.116253	-0.301732	0.234829
Vwa1	0.147181	0.820446	0.799951	0.985163	-0.362546	-0.205268	0.12451	-0.0327679
Sh3bgrl2	0.423841	0.516235	0.5236	0.912707	-0.250172	-0.398078	-0.311252	-0.163346
Gmfg	0.933092	0.967634	0.882219	0.966059	-0.0582837	-0.0749415	0.123197	0.139855
Gm2a	0.65888	0.743918	0.916324	0.813795	0.193518	-0.291783	-0.0754177	0.409883
Epha2	0.145927	0.0783603	0.424082	0.935925	-0.395848	-0.60258	-0.283711	-0.0769785
Rhbg	0.220189	0.483787	0.694189	0.890491	-0.604618	-0.66238	-0.363113	-0.305352
Folr2	0.451756	0.777506	0.990892	0.941785	-0.408563	-0.291642	-0.0154939	-0.132415
Txnrd1	0.875535	0.332054	0.752479	0.798866	-0.0388682	-0.380008	-0.17133	0.16981
Gpx3	0.00601126	0.095014	0.405528	0.884783	-0.881967	-1.06226	-0.369011	-0.188715
C1qc	0.897714	0.66873	0.932848	0.813795	-0.0478987	0.346232	0.0898353	-0.304296
Rassf2	0.616956	0.456193	0.722567	0.754247	0.189666	-0.400255	-0.334382	0.255539
Arhgap25	0.41409	0.398985	0.612746	0.61102	0.212095	-0.574974	-0.261182	0.525886
Lypd5	0.418912	0.882436	0.999722	0.913524	-0.398757	-0.163662	0.00096978	-0.234125
Srsf5	0.479132	0.994328	0.94879	0.898419	-0.13745	0.00579309	0.0333739	-0.109869
Ctsh	0.375387	0.58244	0.917731	0.979766	0.314423	0.329555	0.0568149	0.0416834
Bak1	0.445878	0.0418926	0.956224	0.909468	0.650333	1.0194	0.0580791	-0.310989
Als2cl	0.760456	0.958951	0.599544	0.731949	-0.0904624	0.0509402	0.413174	0.271771
Ctss	0.093972	0.845927	0.596762	0.794587	-0.993495	-0.210083	0.228358	-0.555054
Plek	0.122347	0.621457	0.863868	0.857848	-0.885595	-0.37093	0.159734	-0.354931
Ctsg	0.121513	0.578602	0.335294	0.676011	-0.61395	-0.980165	0.746469	1.11269
Cfp	0.817199	0.971096	0.672084	0.211842	-0.155273	0.112465	-0.975707	-1.24345
Hpgds	0.221149	0.754325	0.302023	0.659792	0.66976	0.806952	-1.31425	-1.45144
Tnip1	0.0515148	0.447497	0.983513	0.731949	0.682372	0.340364	-0.0114681	0.33054
C1qb	0.501116	0.643924	0.604789	0.884783	0.378647	0.386997	0.346926	0.338576
Neu2	0.481993	0.271556	0.92166	0.714502	-0.295024	-0.975449	-0.109002	0.571423
S100a9	0.836665	0.672638	0.288819	0.363822	0.303589	-1.947	2.2678	4.5184
Cd74	0.229722	0.545392	0.266078	0.4535	-0.69895	-0.218201	-0.370398	-0.851147
Slc2a1	0.127734	0.0865504	0.845776	0.830224	-0.650771	-0.724331	0.164994	0.238554
Arrb2	0.272978	0.997591	0.757357	0.924003	-0.316559	-0.0030031	0.156155	-0.157401
Hcar2	0.290326	0.820446	0.62992	0.448651	-0.410379	-0.145353	-0.328726	-0.593752
Pla2g2f	0.163217	0.939105	0.359374	0.902008	0.780365	-0.0925008	-0.601266	0.271599
Alox5ap	0.139936	0.566607	0.967216	0.926829	-0.426836	-0.28625	0.0206168	-0.119969
B2m	0.388776	0.323829	0.872167	0.93266	0.296767	0.548956	0.144022	-0.108167

## Sheet: Eczema_Non-Les vs. Les
Comparison DEGs of vesicular hand eczema with Skin data (doi: 10.1111/exd.14428, Nonlesional vs lesional DEGs)											Proteins with age- and/or sex-dependent significances
	q value				Log2FC						q value ≤ 0.05
Gene Name	Skin_Fe4w/Fe14w	Skin_Ma4w/Ma14w	Skin_Ma4w/Fe4w	Skin_Ma14w/Fe14w	Skin_Fe4w/Fe14w	Skin_Ma4w/Ma14w	Skin_Ma4w/Fe4w	Skin_Ma14w/Fe14w
Lcp1	0.517744	0.97983	0.997248	0.88411	-0.251865	0.0326467	-0.00250387	-0.287016
Tnc	0.307362	0.295433	0.98009	0.678393	-0.443449	-1.20303	0.0229387	0.782525
Krt17	0.0507022	0.2818	0.755298	0.744922	-0.842708	-1.26021	0.246147	0.663653
Krt16	0.00284028	0.470518	0.0404224	0.653798	-1.59533	-1.87873	1.47334	1.75673
Krt6b	0.0051886	0.621457	0.0109736	0.63285	-2.46722	-2.13139	3.24777	2.91194
Krt6a	0.0027647	0.341644	0.0459288	0.654675	-1.38001	-1.68698	0.914651	1.22162
Hephl1	0.143753	0.786552	0.38099	0.925898	0.346372	-0.247791	-0.443093	0.15107
Sntb1	0.978209	0.729904	0.755383	0.941785	0.00973619	-0.163798	-0.228902	-0.0553675
Aadac	0.191611	0.911325	0.823946	0.788456	0.639629	0.0840148	-0.23849	0.317125
S100a9	0.836665	0.672638	0.288819	0.363822	0.303589	-1.947	2.2678	4.5184

## Sheet: Eczema_Les vs. Control
Comparison DEGs of vesicular hand eczema with Skin data (doi: 10.1111/exd.14428, Lesional vs Control DEGs)											Proteins with age- and/or sex-dependent significances
	q value				Log2FC						q value ≤ 0.05
Gene Name	Skin_Fe4w/Fe14w	Skin_Ma4w/Ma14w	Skin_Ma4w/Fe4w	Skin_Ma14w/Fe14w	Skin_Fe4w/Fe14w	Skin_Ma4w/Ma14w	Skin_Ma4w/Fe4w	Skin_Ma14w/Fe14w
Lcp1	0.517744	0.97983	0.997248	0.88411	-0.251865	0.0326467	-0.00250387	-0.287016
Cd207	0.981855	0.0318613	0.0476329	0.00585686	0.00830037	0.973814	-0.694947	-1.66046
Tnc	0.307362	0.295433	0.98009	0.678393	-0.443449	-1.20303	0.0229387	0.782525
Krt16	0.00284028	0.470518	0.0404224	0.653798	-1.59533	-1.87873	1.47334	1.75673
Krt6b	0.0051886	0.621457	0.0109736	0.63285	-2.46722	-2.13139	3.24777	2.91194
Krt6a	0.0027647	0.341644	0.0459288	0.654675	-1.38001	-1.68698	0.914651	1.22162
Hephl1	0.143753	0.786552	0.38099	0.925898	0.346372	-0.247791	-0.443093	0.15107
Lcn2	0.905441	0.502827	0.538693	0.256606	0.166279	-2.56915	1.60218	4.33761
Sntb1	0.978209	0.729904	0.755383	0.941785	0.00973619	-0.163798	-0.228902	-0.0553675
Dpp4	0.158301	0.737417	0.210505	0.984921	0.328966	-0.144756	-0.453852	0.0198698
Cdh3	0.287928	0.762122	0.605257	0.869999	-0.243697	-0.262477	0.235188	0.253968
Parp9	0.222213	0.927368	0.643153	0.510014	-0.321023	0.0794602	-0.161857	-0.56234
S100a9	0.836665	0.672638	0.288819	0.363822	0.303589	-1.947	2.2678	4.5184
