# Supplementary material for: Deep proteome profiling reveals signatures of age and sex differences in paw skin and sciatic nerve of naïve mice
Source: eLife. 2022 Nov 30;11:e81431. doi: 10.7554/eLife.81431 (PMC9711526; doi:10.7554/eLife.81431)
Supplement: Figure 6—source data 4. [file elife-81431-fig6-data4.xlsx]

## Sheet: Sheet1
Comparison between pain related genes with SCN proteome (PainResearchForum, HumanPainGene, PainGeneDB, in total 841 genes)										Proteins with age- and/or sex-dependent significances
	q value				Log2FC					q value ≤ 0.05
Gene Name	SCN_Fe4w/Fe14w	SCN_Ma4w/Ma14w	SCN_Ma4w/Fe4w	SCN_Ma14w/Fe14w	SCN_Fe4w/Fe14w	SCN_Ma4w/Ma14w	SCN_Ma4w/Fe4w	SCN_Ma14w/Fe14w
Abat	0.0504228	0.0108741	0.981585	0.915338	-0.268615	-0.3331	-0.0154652	0.0490194
Abcb1a	0.000609482	3.31902e-05	0.864944	0.738922	-1.05354	-1.24626	-0.0806995	0.112018
Abcc4	0.367658	0.878836	0.888666	0.983767	-0.0997626	-0.0296169	0.0819806	0.0118349
Acap2	0.24712	0.0635462	0.862867	0.991363	0.129462	0.190673	0.0653772	0.00416584
Ace	0.411006	0.0279509	0.778385	0.0175688	0.104652	-0.413727	0.187601	0.70598
Ace2	0.012017	0.000167942	0.857846	0.934035	-0.946986	-1.15912	-0.16698	0.0451552
Ache	0.930517	0.680036	0.954024	0.978987	0.0173702	0.0811354	0.0402145	-0.0235507
Aco1	0.0123119	0.0011118	0.941025	0.628401	0.32261	0.498341	0.0328375	-0.142893
Actn4	0.00645164	0.00529356	0.791392	0.938505	-0.549467	-0.453129	0.134745	0.0384062
Adam11	0.00302234	0.000230002	0.645443	0.98064	-0.570309	-0.786001	-0.227589	-0.0118965
Alox5	0.337744	0.0531645	0.887292	0.658042	-0.167033	-0.348916	0.0813541	0.263238
Anapc4	0.0117801	0.026718	0.983132	0.756383	0.521565	0.354204	-0.0168011	0.15056
Anxa1	0.00748883	0.00187367	0.848133	0.959593	-0.480268	-0.552064	-0.0927475	-0.0209521
Anxa2	0.0285543	0.00436119	0.79203	0.85544	-0.361252	-0.301824	0.120898	0.0614696
Apoe	0.639724	0.0381175	0.67432	0.867739	-0.100374	0.527631	0.506072	-0.121933
Aqp1	0.218986	0.0955265	0.814702	0.448361	-0.216922	-0.379987	0.193706	0.356771
Arrb2	0.594209	0.342109	0.83534	0.866364	0.0605919	0.0739483	0.0700782	0.0567218
Arvcf	0.149055	0.019189	0.953627	0.842999	0.229512	0.36736	0.0475759	-0.0902727
Atf7	0.851258	0.510178	0.995982	0.818151	-0.0593869	0.256031	-0.00501177	-0.320429
Atl1	0.914327	0.968883	0.894738	0.882522	0.0187904	-0.00395968	0.0525342	0.0752842
Atp1a2	0.0977621	0.00707438	0.886518	0.994025	-0.23429	-0.293569	-0.0567731	0.00250575
B2m	0.00235423	0.0225649	0.748856	0.768034	-0.748247	-0.392962	0.228093	-0.127192
Bbs1	0.0806642	0.655855	0.985716	0.402613	0.603129	0.0808027	0.0225193	0.544846
C5ar1	0.949487	0.00296931	0.996978	0.157533	0.0204132	-0.837159	0.00157336	0.859145
Cacna2d1	0.11905	0.00488364	0.717496	0.994025	-0.607517	-0.972416	-0.376103	-0.0112046
Cacna2d2	0.261501	0.615574	0.759749	0.863623	0.142463	0.118686	0.143454	0.16723
Cacna2d3	0.461084	0.00571226	0.928205	0.572834	-0.193925	-0.706484	-0.0695555	0.443003
Cacnb3	0.0637477	0.0220908	0.979194	0.888873	-0.311061	-0.401428	0.0159431	0.106309
Calb1	0.00049971	3.97323e-05	0.865695	0.734939	-1.30693	-1.20722	-0.0687653	-0.168474
Calca	0.00353867	0.832984	0.979288	0.066161	0.702135	-0.0422888	0.023741	0.768164
Calcrl	0.990994	0.171353	0.645443	0.994025	-0.0086937	0.392498	0.415414	0.0142224
Camk2a	0.46606	0.0373769	0.734146	0.978987	-0.632001	-1.33346	-0.795936	-0.0944816
Casp1	0.0580683	0.0900956	0.979826	0.840797	-0.444935	-0.324055	-0.0284614	-0.149342
Casp6	0.0644382	0.0337795	0.912771	0.823432	0.408357	0.433879	-0.095449	-0.120971
Cbr3	0.000589839	9.83028e-05	0.791392	0.809903	-0.868798	-0.91428	-0.12288	-0.0773977
Cct5	0.462745	0.327928	0.954444	0.936431	-0.0706315	-0.070953	-0.0239852	-0.0236637
Cd14	0.00597757	0.00435294	0.72393	0.6794	-1.14781	-0.987019	0.484035	0.323246
Cd38	0.022562	0.0082767	0.778385	0.679934	-0.58248	-0.814516	0.165357	0.397393
Cdk5	0.00412248	0.000282766	0.685111	0.823222	-0.534078	-0.590845	-0.14902	-0.0922533
Cfdp1	0.0792049	0.333235	0.938483	0.892538	0.285604	0.14772	-0.0452306	0.092653
Clic5	0.462746	0.220707	0.821632	0.966683	-0.324043	-0.758173	-0.314791	0.119339
Col4a1	0.7553	0.102868	0.992955	0.768994	0.0757046	0.322504	0.00908501	-0.237715
Col5a1	0.0782509	0.00549239	0.717496	0.818151	0.361559	0.494778	0.26776	0.13454
Comt	0.244109	0.0567509	0.985685	0.845604	0.117645	0.178242	-0.00815925	-0.0687561
Cp	0.00456847	0.059011	0.954024	0.132504	-0.548082	-0.221367	0.0410067	-0.285708
Crip2	0.00427791	0.973456	0.67432	0.589699	-0.518757	-0.00602178	0.285119	-0.227616
Csk	0.240528	0.0191682	0.821632	0.96888	-0.172083	-0.269676	-0.0750844	0.0225084
Csnk1d	0.373467	0.760844	0.963566	0.936431	-0.150067	-0.0554894	0.0503794	-0.0441983
Ctnna2	0.625669	0.638258	0.997775	0.620092	0.0706503	-0.0641784	0.000978573	0.135807
Ctnna3	0.107216	0.0906558	0.892317	0.999006	-0.216776	-0.174315	0.041614	-0.000847184
Ctsb	0.605448	0.64328	0.994416	0.980158	-0.0714153	-0.0861667	0.00527773	0.0200292
Ctss	0.00214612	0.00346542	0.809178	0.846336	-0.925191	-0.875658	-0.128338	-0.177871
Dbh	0.0161378	0.322856	0.898331	0.308914	0.445162	0.166315	0.0828557	0.361703
Dlg2	0.116607	0.0615012	0.911132	0.981887	-0.317716	-0.244155	0.0581244	-0.0154369
Dlg4	0.0367974	0.0109505	0.874564	0.913859	-0.434863	-0.405818	-0.0544156	-0.0834606
Dmd	0.220556	0.0382785	0.72757	0.955363	0.126543	0.252829	0.151671	0.0253849
Dnaja3	0.257818	0.0149418	0.681871	0.978301	-0.202551	-0.420476	-0.194107	0.0238178
Dnmt1	0.062346	0.142496	0.753606	0.877752	0.366249	0.362525	-0.176207	-0.172484
Dpp4	0.00171134	0.000302518	0.726164	0.203895	-0.87431	-0.796762	-0.234353	-0.311901
Dync1i1	0.0125688	0.00195329	0.759749	0.97791	-0.656952	-0.473306	0.16281	-0.0208354
Ecm1	0.00680534	0.000142712	0.822538	0.354932	-0.757716	-1.14499	-0.168747	0.21853
Efnb1	0.655647	0.352638	0.995982	0.930534	0.0627127	0.102442	-0.0028347	-0.0425637
Elac2	0.12914	0.0270095	0.98082	0.985615	0.314238	0.34871	0.0202243	-0.0142477
Enpp1	0.201541	0.50419	0.970583	0.804884	-0.248799	-0.0703622	0.0227222	-0.155714
Enpp2	0.165033	0.00227491	0.759749	0.416931	0.16671	0.633277	0.122718	-0.343849
Ephx2	0.00349057	0.00201775	0.855309	0.850789	-0.882715	-0.669435	0.130075	-0.0832058
F2	0.101055	0.492726	0.988412	0.333114	-0.320825	0.114069	-0.0129694	-0.447863
Faah	0.000847056	0.000194332	0.936353	0.956183	0.990659	0.985383	-0.0381365	-0.0328604
Faf1	0.020993	0.003391	0.963912	0.892703	-0.360124	-0.372908	0.0315694	0.044353
Faf2	0.137906	0.00193929	0.734578	0.978987	0.249938	0.46259	0.20018	-0.0124726
Fgf13	0.795829	0.986588	0.98313	0.936871	0.076838	-0.0046853	0.0204939	0.102017
Fkbp5	0.345355	0.00502422	0.802332	0.0197384	0.106685	-0.549835	-0.153219	0.503301
Fmr1	0.495228	0.0421402	0.791392	0.662988	0.206747	0.324762	0.296453	0.178437
Fndc3b	0.15507	0.0165215	0.76172	0.899131	0.264445	0.582101	0.208928	-0.108728
Fstl1	0.232419	0.578109	0.968966	0.899391	0.199372	0.0803304	-0.0247537	0.0942876
Fyn	0.336362	0.584688	0.927105	0.907295	-0.16724	-0.0530071	0.0450879	-0.0691446
Gfap	0.137846	0.0599792	0.984037	0.735562	-0.534429	-0.75662	0.0456698	0.267861
Gfra2	0.239441	0.956719	0.928375	0.78787	0.308044	0.0209865	0.080589	0.367647
Gla	0.216787	0.820206	0.67432	0.987671	-0.21687	0.0662063	0.261559	-0.0215182
Gnao1	0.0575475	0.00367852	0.775228	0.927475	-0.261989	-0.415787	-0.106002	0.0477967
Gnaq	0.0270938	0.00537134	0.897615	0.944198	-0.387727	-0.479087	-0.0434609	0.0478995
Gnas	0.0172622	0.000321061	0.984037	0.973604	-0.578151	-0.571964	-0.0137285	-0.0199148
Gnaz	0.0351062	0.0116229	0.988876	0.901555	-0.336382	-0.431758	-0.00678978	0.0885864
Gnb3	0.62099	0.163962	0.62637	0.991225	-0.380431	0.312345	0.723237	0.0304612
Gpd2	0.364742	0.0524578	0.669821	0.867739	-0.383252	-0.464404	-0.355967	-0.274815
Grk5	0.119079	0.485549	0.991995	0.308914	-0.281846	0.105107	0.0104679	-0.376485
Grk6	0.203401	0.875151	0.750914	0.981887	-0.212743	-0.0211668	0.203921	0.0123451
Grn	0.629261	0.00352169	0.753416	0.791658	0.267368	-0.562225	-0.481707	0.347886
H2-Ab1	0.000699803	0.0100147	0.62637	0.731473	-1.6327	-0.766087	0.574917	-0.291698
Hcn1	0.270075	0.79187	0.833637	0.803961	0.620473	-0.0836398	-0.204587	0.499526
Hdac4	0.917125	0.140242	0.718858	0.934035	-0.0286116	0.175943	0.265378	0.0608236
Hint1	0.0615736	0.000389644	0.717496	0.998971	-0.548526	-0.851904	-0.301754	0.00162411
Hmox2	0.970026	0.0733087	0.685111	0.936431	0.00734724	-0.222824	-0.177834	0.0523372
Htra1	0.682275	0.697149	0.967335	0.88485	-0.0627026	0.073889	0.0427612	-0.0938304
Ica1	0.0023294	0.0832368	0.753606	0.582683	-0.725373	-0.290066	0.237984	-0.197323
Icam1	0.00120459	0.000103418	0.872509	0.98064	-1.04104	-1.13459	-0.102737	-0.00918549
Il10rb	0.799172	0.941627	0.904787	0.829598	-0.0923989	-0.0320123	-0.190138	-0.250525
Il16	0.343786	0.088325	0.979655	0.929761	0.146475	0.211897	0.021055	-0.044367
Il1rap	0.253753	0.311967	0.866058	0.358324	0.184168	-0.14177	0.0703628	0.396301
Il6st	0.0402594	0.0212176	0.753606	0.88485	-0.337219	-0.250947	0.152477	0.0662051
Insr	0.622822	0.0622696	0.83528	0.927225	0.166711	0.259902	0.177272	0.0840807
Iqgap1	0.798148	0.685494	0.839161	0.88485	0.0302051	0.0384209	0.0677565	0.0595407
Itgb5	0.0888138	0.00558414	0.995721	0.902515	-0.305618	-0.381258	-0.00459879	0.0710418
Itpr1	0.011106	0.293614	0.718858	0.845011	-0.43496	-0.145419	0.175551	-0.113991
Kcna1	0.0670084	0.0626432	0.734146	0.903902	-0.421303	-0.293244	0.224357	0.0962975
Kif1a	0.411423	0.704247	0.821632	0.97608	-0.1098	-0.0377782	0.0871051	0.0150837
L1cam	0.00479465	0.00195329	0.786961	0.876223	-0.683663	-0.4741	0.11671	-0.0928528
Lama4	0.0290387	0.00474002	0.864076	0.822265	-0.269816	-0.293959	0.0509285	0.0750717
Lgals1	0.0334434	0.00212069	0.897615	0.896753	-0.470537	-0.631249	-0.0853362	0.0753758
Lpar1	0.929826	0.348164	0.983132	0.820429	0.0231578	-0.102162	-0.0236385	0.101682
Lrp1	0.352823	0.546977	0.825126	0.734939	0.0987771	0.0550455	0.0725109	0.116242
Lxn	0.0113882	0.00296144	0.799492	0.658896	-0.475028	-0.371265	-0.0850902	-0.188853
Lyn	0.799257	0.78941	0.975539	0.968398	-0.031327	-0.033313	-0.0205594	-0.0185734
Lyst	0.782478	0.110582	0.787553	0.679934	0.205977	-0.287267	0.308031	0.801275
Maoa	0.0941488	0.0300447	0.799883	0.728985	-0.165125	-0.195541	0.0753122	0.105728
Maob	0.00625244	0.000333001	0.820054	0.820759	-1.00213	-1.03557	0.149934	0.183373
Map2k1	0.00215228	0.747584	0.645443	0.454966	-0.53123	0.0513618	0.332202	-0.25039
Map2k3	0.549535	0.414963	0.62637	0.999006	0.179109	-0.14084	-0.320667	-0.000717841
Mapk1	0.142481	0.765455	0.814502	0.869077	-0.171452	-0.0270162	0.0763049	-0.0681311
Mapk10	0.0172091	0.019555	0.864583	0.697565	-0.735088	-0.670156	-0.176645	-0.241577
Mapk14	0.589377	0.397458	0.821632	0.863623	-0.0900715	-0.115529	-0.122459	-0.0970021
Mapk3	0.00558888	0.00566926	0.814702	0.884653	-0.525197	-0.37071	0.0753565	-0.0791307
Mapk8	0.708657	0.0395772	0.681871	0.979073	-0.058924	-0.378117	-0.333946	-0.0147531
Mapk9	0.0295658	0.0326792	0.995982	0.924896	-0.276968	-0.234934	0.0023898	-0.0396445
Mapt	0.00179064	0.000734175	0.894359	0.911771	-0.686493	-0.582855	0.0518845	-0.0517527
Mgll	0.0011453	0.000408584	0.753606	0.587437	0.685623	0.697988	0.160874	0.148509
Mif	0.0177419	4.43355e-05	0.427303	0.989074	-0.533325	-1.11286	-0.587714	-0.00818219
Mme	0.00159876	0.000927982	0.791392	0.937385	0.815907	0.648995	-0.127384	0.0395274
Mpdz	0.945365	0.0931736	0.759749	0.927475	-0.0114749	0.138497	0.10075	-0.0492222
Msh2	0.705898	0.934765	0.997775	0.921098	0.0575182	-0.0154203	-0.000728911	0.0722096
Mtdh	0.0124748	0.00133112	0.809178	0.985615	0.411278	0.507809	0.104647	0.00811629
Mthfd1	0.513973	0.110892	0.967335	0.880564	0.0695478	0.152848	0.0219165	-0.0613839
Mthfr	0.288986	0.00527069	0.685111	0.897165	0.19218	0.465279	0.174091	-0.0990075
Mtr	0.135469	0.24887	0.84705	0.929927	-0.207799	-0.102178	0.0648094	-0.0408113
Myd88	0.543673	0.303479	0.808059	0.843862	-0.097728	0.160766	0.143417	-0.115076
Nap1l1	0.829706	0.0252671	0.841728	0.6794	0.0357248	0.337696	0.078665	-0.223307
Ncam1	0.64173	0.23928	0.752812	0.964311	-0.0526329	0.127839	0.162831	-0.0176413
Ncor2	0.547364	0.416829	0.759749	0.912241	-0.13223	0.27714	0.241342	-0.168028
Nedd4l	0.0584218	0.016611	0.970455	0.991225	-0.300727	-0.282555	0.0236261	0.0054543
Nf1	0.343855	0.253743	0.995721	0.981887	0.126935	0.117286	0.00290819	0.0125576
Nfkb1	0.263514	0.761324	0.959429	0.912241	0.117056	0.0369952	-0.0288936	0.0511675
Nfkbia	0.0363456	0.154214	0.734146	0.780767	0.63475	0.215225	-0.157776	0.261749
Ngfr	0.998156	0.0229381	0.555489	0.946978	0.00105723	0.573272	0.476051	-0.0961631
Nmt1	0.0550455	0.090576	0.95791	0.954888	0.204627	0.267441	0.0273109	-0.0355028
Nnmt	0.713071	0.931332	0.963546	0.91036	-0.0804857	0.026724	-0.0422195	-0.149429
Nos3	0.189621	0.0933491	0.802332	0.738922	-0.504732	-0.624895	0.318419	0.438582
Npepps	0.005825	0.00266466	0.995982	0.919834	-0.397109	-0.3566	0.00278642	-0.0377229
Nptx1	0.70529	0.78363	0.894359	0.968398	0.0581094	-0.0854255	-0.0953207	0.0482142
Nr3c1	0.250015	0.366026	0.984037	0.892538	-0.169175	-0.088235	0.0110741	-0.0698655
Nrp1	0.244994	0.17339	0.887872	0.809903	-0.154062	-0.201993	0.0732037	0.121134
Nt5e	0.00297069	0.00010948	0.817547	0.170593	-0.66741	-0.910768	0.103256	0.346614
Numb	0.125249	0.110892	0.768959	0.818151	-0.223023	-0.168342	0.146837	0.0921564
P2rx4	0.0947588	0.0101826	0.829767	0.202845	-0.252707	-0.530787	0.132239	0.410319
P2rx7	0.00529329	0.000934728	0.67432	0.831495	-0.532168	-0.623754	-0.199705	-0.108119
P2ry12	0.098411	0.0210801	0.98313	0.994746	-0.358048	-0.376641	-0.0222152	-0.00362221
P2ry2	0.154904	0.52203	0.743073	0.955353	-0.651004	-0.123994	0.457668	-0.0693414
Patj	0.00520614	0.0330098	0.753606	0.981887	-0.715345	-0.492113	0.202685	-0.0205474
Pcsk2	0.890782	0.352638	0.759749	0.920368	0.0634115	0.267844	0.361906	0.157473
Pick1	0.524375	0.00529667	0.72393	0.924896	-0.177494	-0.510108	-0.236487	0.0961264
Pip5k1a	0.861637	0.260982	0.842136	0.740716	-0.0621457	-0.245557	0.152393	0.335805
Pip5k1c	0.0205419	0.00496096	0.983132	0.978982	-0.356804	-0.333295	0.0100872	-0.0134218
Pirt	0.199233	0.755677	0.995982	0.790663	0.362574	0.0717675	-0.00279223	0.288014
Plcb1	0.0653348	0.00328436	0.871037	0.728985	-0.217914	-0.397475	-0.0603431	0.119218
Plcb3	0.0119602	0.000621821	0.901032	0.947039	-0.475337	-0.554629	-0.04424	0.0350517
Plcl1	0.0118252	0.000787012	0.910208	0.912241	-0.505092	-0.513502	-0.0571663	-0.048756
Plp1	0.254501	0.0217128	0.73056	0.913859	-0.176166	-0.261335	-0.147127	-0.0619576
Polr1c	0.703225	0.517346	0.780029	0.94797	0.0526779	-0.0819488	-0.0935067	0.0411199
Pon1	0.364054	0.244479	0.763008	0.888283	-0.329963	-0.490863	-0.413593	-0.252693
Por	0.0621359	0.576889	0.72393	0.831495	-0.189981	0.0638083	0.178484	-0.0753058
Ppp1r9b	0.313994	0.178997	0.734578	0.756422	-0.128402	-0.186646	0.118889	0.177133
Prkaa2	0.165033	0.0130173	0.72757	0.957328	-0.696247	-1.06833	-0.479342	-0.107255
Prkar1b	0.422126	0.173844	0.717407	0.927475	-0.257368	-0.156098	0.209314	0.108044
Prkca	0.000430916	7.13193e-05	0.821632	0.965691	-1.10071	-1.02891	0.0912098	0.0194153
Prkcb	0.00803717	0.000248594	0.804874	0.893734	-0.52563	-0.685415	-0.0915845	0.068201
Prkcd	0.0339765	0.03259	0.979655	0.980405	-0.274475	-0.265465	0.0185012	0.00949092
Prkce	0.0169912	0.171893	0.83534	0.847961	-0.319456	-0.262447	-0.0841338	-0.141143
Prkg1	0.00511206	0.00424963	0.842045	0.893939	-0.554848	-0.413433	0.074734	-0.066681
Prnp	0.0313681	0.00163494	0.861173	0.708217	-0.543056	-0.64884	0.107714	0.213498
Prx	0.000450263	4.96432e-05	0.821632	0.962448	-0.882767	-0.972749	-0.0705245	0.0194575
Ptges	0.00396188	0.553821	0.901032	0.132504	-0.63719	0.150284	0.10443	-0.683045
Ptgs1	0.209322	0.000261606	0.791392	0.0110432	-0.215072	-0.997337	-0.196534	0.585732
Ptpn6	0.861593	0.893851	0.887231	0.901555	-0.0454253	-0.0337851	-0.111895	-0.123536
Rab7a	0.170201	0.102868	0.954444	0.904811	-0.128946	-0.153183	0.0230594	0.0472963
Rabgap1l	0.917125	0.630493	0.791392	0.919941	0.0247168	0.0676625	0.126825	0.0838791
Rabggta	0.0140459	0.00092141	0.759749	0.941112	-0.317351	-0.453258	-0.109902	0.0260046
Ret	0.0731494	0.921618	0.910208	0.818151	0.274269	0.0230807	-0.059649	0.191539
Retn	0.00591209	0.00237871	0.427303	0.245033	-0.593367	-0.966949	-0.869647	-0.496065
Rhbdf2	0.184836	0.632316	0.936965	0.831495	0.283937	0.0741055	-0.0501062	0.159725
Rnf123	0.971741	0.490124	0.859468	0.959593	0.00453432	0.0977355	0.0629659	-0.0302352
Rnf213	0.00235423	0.000169388	0.989219	0.589699	0.574833	0.764228	0.0067099	-0.182685
Rsu1	0.0262225	0.0052622	0.839272	0.999006	-0.327199	-0.394292	-0.0675317	-0.000438667
S100a10	0.0119619	0.0576899	0.759749	0.872353	-0.849383	-0.588928	0.396633	0.136178
S100b	0.077749	0.110914	0.857301	0.818151	-1.31811	-0.568399	0.360035	-0.389675
S1pr3	0.0220123	0.0750289	0.834353	0.485002	-0.441644	-0.568415	0.227997	0.354768
Scn10a	0.243083	0.493214	0.645443	0.995946	-0.242989	0.15391	0.393112	-0.0037865
Scn9a	0.35587	0.193984	0.866102	0.954888	-0.269045	-0.204149	0.119308	0.0544118
Sdk1	0.842236	0.724476	0.942106	0.954888	-0.0447071	-0.0402849	-0.0382495	-0.0426718
Serpina3n	0.442935	0.146444	0.941832	0.442177	0.119062	-0.347723	0.0507901	0.517575
Serpina6	0.00178218	0.0188435	0.22503	0.00292805	-0.802676	0.771801	-0.717145	-2.29162
Sfrp1	0.472869	0.084892	0.887872	0.202845	-0.110889	-0.495077	0.141547	0.525735
Shc1	0.288234	0.0637244	0.875258	0.743967	-0.169784	-0.242772	0.0777167	0.150705
Sigmar1	0.0065203	0.0212587	0.98313	0.913859	0.616912	0.517159	-0.0246416	0.0751116
Slc12a2	0.00902425	0.00116016	0.978219	0.907295	-0.414083	-0.483506	-0.014955	0.0544679
Slc12a6	0.292929	0.418197	0.995982	0.804052	-0.4742	-0.232359	0.0114709	-0.23037
Slc2a1	0.000703671	3.65787e-05	0.98313	0.818151	-1.0017	-1.09508	0.0132197	0.106596
Slc6a1	0.0993485	0.756916	0.912271	0.308914	-0.616154	-0.0448043	0.129722	-0.441627
Slc6a2	0.678904	0.875977	0.919969	0.829933	0.0932533	-0.0359582	0.0681192	0.197331
Smg6	0.903224	0.961414	0.910208	0.911771	0.0531175	-0.014079	0.104899	0.172096
Snap25	0.154063	0.833782	0.791392	0.906098	-0.232555	-0.0252103	0.151565	-0.05578
Snx8	0.0129837	0.3483	0.79553	0.334365	0.470889	0.126848	0.0804638	0.424506
Sod2	0.0312631	0.00352169	0.98313	0.954105	-0.507956	-0.505076	-0.0258089	-0.0286881
Sparc	0.00267468	0.000261145	0.965546	0.809903	0.795636	0.915749	-0.0267406	-0.146854
Specc1l	0.294245	0.0415548	0.979655	0.912241	-0.133762	-0.193366	-0.0160502	0.043554
Sphk2	0.518459	0.174047	0.647175	0.683342	-0.12401	-0.184406	0.213177	0.273573
Spock2	0.933952	0.54736	0.970236	0.822265	-0.0145222	0.0725316	-0.0259979	-0.113052
Spon1	0.0149421	0.00136927	0.734578	0.423208	-0.93799	-0.705869	-0.28593	-0.518052
Spp1	0.000444395	5.50008e-05	0.940363	0.872351	-1.61614	-1.57112	-0.0567874	-0.101808
Sptlc1	0.00529329	7.77518e-05	0.685111	0.963811	1.06841	1.25185	0.229535	0.0460991
Sptlc2	0.00044135	9.17752e-05	0.820054	0.485002	0.924219	1.26518	0.104617	-0.236344
Srr	0.0486784	0.0924567	0.926065	0.827239	-0.504312	-0.308677	0.0962782	-0.0993566
Stag1	0.220739	0.000729379	0.791392	0.884653	0.221244	0.433077	0.143191	-0.0686428
Stard13	0.421364	0.685494	0.984037	0.738333	0.106563	-0.0406383	-0.0111711	0.13603
Stat6	0.651017	0.648193	0.838476	0.856284	0.0516593	0.0410804	0.0626598	0.0732388
Stk39	0.706951	0.284241	0.983132	0.909903	-0.0522804	-0.0988308	0.0108448	0.0573953
Stx1a	0.726732	0.478129	0.829973	0.647837	-0.0606027	-0.103469	0.134849	0.177715
Svep1	0.00446894	0.00245502	0.970236	0.311445	-0.670879	-0.939969	0.0515422	0.320632
Syn2	0.00547912	0.000690511	0.685111	0.820759	-0.597011	-0.539439	0.17191	0.114337
Syne1	0.191771	0.0196366	0.856548	0.882522	-0.119666	-0.222153	-0.0557877	0.0466998
Taok3	0.801104	0.0438227	0.647175	0.904881	0.0405895	0.254343	0.279934	0.0661805
Tf	0.355517	0.7371	0.809178	0.136202	-0.184681	0.0514046	-0.182725	-0.418811
Tfrc	0.00195471	0.000226502	0.83534	0.712677	0.69581	0.640264	0.0745475	0.130093
Th	0.271398	0.0501943	0.815151	0.431361	0.164405	-0.205995	-0.0901058	0.280294
Thbs4	0.194304	0.625159	0.97231	0.886745	0.165305	0.0672988	-0.0252219	0.0727844
Timp3	0.109679	0.152188	0.920925	0.78787	-0.414837	-0.271931	-0.0774538	-0.22036
Tlr3	0.137746	0.468254	0.983132	0.97791	-0.462846	-0.481928	0.0549576	0.0740403
Tmem165	0.00199992	0.163585	0.759492	0.665662	0.995608	0.373168	-0.314621	0.307819
Trpv1	0.552486	0.763592	0.947907	0.874933	-0.141179	0.0630543	0.066091	-0.138143
Trpv2	0.0853583	0.0041018	0.978219	0.524644	-0.270619	-0.541607	-0.0238527	0.247135
Txnrd2	0.438753	0.517028	0.995982	0.942206	-0.178949	-0.118514	-0.00448428	-0.0649195
Uchl1	0.000430916	8.58856e-05	0.887231	0.738922	-1.01827	-0.971892	-0.0602151	-0.106594
Wnk1	0.55366	0.0720869	0.717496	0.872351	0.0678035	0.162402	0.15779	0.0631909
Wwp2	0.0921976	0.841511	0.802919	0.902515	-0.242451	-0.0373347	0.109711	-0.0954051
Yap1	0.310831	0.563119	0.939048	0.738333	-0.226877	0.141395	0.0709621	-0.29731
Yy1	0.0445013	0.770387	0.759749	0.876577	0.629084	-0.152088	-0.51149	0.269682
Zeb2	0.00319799	0.00305288	0.934781	0.973604	0.669536	0.59806	-0.0517998	0.0196768
