# Supplementary material for: Deep proteome profiling reveals signatures of age and sex differences in paw skin and sciatic nerve of naïve mice
Source: eLife. 2022 Nov 30;11:e81431. doi: 10.7554/eLife.81431 (PMC9711526; doi:10.7554/eLife.81431)
Supplement: Figure 6—source data 5. [file elife-81431-fig6-data5.xlsx]

## Sheet: Sheet1
Comparison 1024 DEPs from SCN injury model with our SCN dataset (Front Mol Neurosci, 2018. 11: p. 259)											q value≤ 0.05
	q value				Log2FC
Gene Name	SCN_Fe4w/Fe14w	SCN_Ma4w/Ma14w	SCN_Ma4w/Fe4w	SCN_Ma14w/Fe14w	SCN_Fe4w/Fe14w	SCN_Ma4w/Ma14w	SCN_Ma4w/Fe4w	SCN_Ma14w/Fe14w
A2m	0.304733	0.00207134	0.516006	0.927475	0.161743	0.623946	0.516915	0.054712
Aacs	0.000176854	2.33728e-06	0.787553	0.845011	1.76361	1.95201	0.1142	-0.0742027
Aak1	0.00474963	0.00125999	0.940363	0.815429	-0.523379	-0.446052	-0.0279974	-0.105325
Aamdc	0.000430916	0.000129401	0.791392	0.815429	-1.01709	-1.03208	-0.116369	-0.10138
Abat	0.0504228	0.0108741	0.981585	0.915338	-0.268615	-0.3331	-0.0154652	0.0490194
Abca6	0.44232	0.682231	0.923689	0.981887	-0.090504	-0.0422346	0.0373081	-0.0109614
Abca9	0.489076	0.389685	0.878706	0.768227	-0.0748839	0.0872787	0.0561527	-0.10601
Abcb1a	0.000609482	3.31902e-05	0.864944	0.738922	-1.05354	-1.24626	-0.0806995	0.112018
Abhd12	0.343855	0.0207225	0.84648	0.987629	0.150824	0.216882	0.0559921	-0.0100657
Ablim1	0.0065805	0.00071285	0.842499	0.876898	-0.413133	-0.539393	-0.0558432	0.0704167
Ablim2	0.00269522	0.000127984	0.734146	0.959593	-0.650526	-0.83611	-0.163121	0.0224626
Abracl	0.836081	0.069283	0.898806	0.734939	0.0758752	0.531764	0.165762	-0.290127
Acaa1a	0.00649034	0.00321954	0.888047	0.859665	0.401921	0.392378	0.0529113	0.0624539
Acads	0.867767	0.0523792	0.717496	0.925759	-0.0280569	-0.290986	-0.200467	0.0624618
Acat1	0.261501	0.089851	0.969919	0.918822	-0.128481	-0.202299	-0.0231519	0.0506661
Acat2	0.00526268	0.000291856	0.814702	0.95091	0.689831	0.747891	0.0953246	0.0372649
Ace	0.411006	0.0279509	0.778385	0.0175688	0.104652	-0.413727	0.187601	0.70598
Acly	0.202614	0.0409359	0.787287	0.907295	-0.149971	-0.206991	-0.106092	-0.0490714
Aco2	0.553638	0.0209234	0.685111	0.902996	-0.143548	-0.549888	-0.269753	0.136587
Acot1	0.0225719	0.126514	0.753416	0.831495	0.402417	0.249703	-0.245247	-0.0925337
Acot13	0.0188471	0.000679637	0.734146	0.862363	-0.470005	-0.752883	-0.168506	0.114372
Acsl1	0.201223	0.543662	0.93156	0.899131	-0.445341	-0.172991	0.0991789	-0.173171
Acsl4	0.25735	0.00510708	0.934781	0.438204	-0.16557	-0.381365	0.0418888	0.257684
Actr2	0.645452	0.674139	0.975539	0.856664	-0.0687072	0.0566113	0.020836	-0.104483
Actr3	0.636629	0.0541582	0.850971	0.911731	-0.0642035	-0.186224	-0.0783756	0.0436446
Acyp1	0.00293736	0.000448601	0.826746	0.820429	-0.523301	-0.510634	-0.0673437	-0.0800103
Acyp2	0.00194689	0.000621821	0.899934	0.697565	-1.07503	-0.938021	-0.085869	-0.222875
Adam10	0.103537	0.0772532	0.976572	0.978009	-0.196405	-0.168831	0.0138209	-0.0137525
Adam22	0.094859	0.00189756	0.669821	0.924	-0.309078	-0.413059	-0.168796	-0.0648154
Adam23	0.03044	0.00136927	0.854722	0.978987	-0.5775	-0.688125	-0.0876401	0.0229843
Add2	0.0124748	0.0019052	0.954444	0.945002	-0.471433	-0.484086	0.0268696	0.0395226
Adk	0.0138696	0.0100048	0.736002	0.545949	-0.360962	-0.399409	-0.201087	-0.162639
Adrm1	0.0119366	0.55472	0.940363	0.679934	0.370639	0.102765	-0.0458195	0.222054
Adss2	0.0114279	0.000714464	0.809178	0.936803	-0.444133	-0.505763	-0.0947883	-0.0331586
Aebp1	0.0200537	0.318801	0.717496	0.96385	-0.301673	-0.129253	0.195296	0.0228761
Ahcy	0.0249347	0.00223961	0.839272	0.936871	0.274908	0.362379	0.0587483	-0.028723
Ahcyl1	0.89492	0.998709	0.967162	0.985873	0.0225821	0.000224348	-0.0335555	-0.0111977
Ahcyl2	0.35196	0.319868	0.988412	0.956642	-0.166616	-0.156258	-0.0161994	-0.0265569
Ahsa1	0.0043742	0.00308002	0.787287	0.983767	-0.530954	-0.405892	0.11632	-0.0087419
Ak1	0.154644	0.0347196	0.669821	0.934283	-0.693661	-1.1272	-0.629036	-0.195502
Ak2	0.305181	0.427869	0.963402	0.981887	-0.189442	-0.129539	0.0433816	-0.0165211
Akap12	0.763927	0.0880573	0.811981	0.832379	0.031659	0.215476	0.110705	-0.0731118
Akr1a1	0.0266506	0.00502439	0.851828	0.952416	-0.305355	-0.343687	-0.0633825	-0.0250502
Akr1b1	0.00107385	4.23378e-05	0.912158	0.892538	-1.23867	-1.1083	0.0740118	-0.0563557
Akr1e2	0.0322979	0.107198	0.970016	0.661385	-0.284276	-0.167302	-0.0238689	-0.140843
Aldh1a1	0.000491845	7.84334e-06	0.981663	0.953549	-2.10145	-2.11531	-0.0352347	-0.0213793
Aldh1l1	0.137129	0.947146	0.910208	0.620092	0.191754	-0.00773104	-0.0569054	0.142579
Aldh2	0.645452	0.0449215	0.984037	0.665411	-0.0592758	-0.206067	0.0105531	0.157344
Aldh6a1	0.0105838	0.000222026	0.72757	0.843604	-0.465333	-0.708466	-0.14874	0.0943935
Aldh7a1	0.00585741	0.313803	0.696987	0.657938	-0.40627	-0.0950946	0.170914	-0.140261
Aldh9a1	0.0264121	0.0136208	0.887872	0.999006	-0.277806	-0.232987	0.0443094	-0.000510262
Aldoc	0.462628	0.254069	0.884387	0.907527	-0.106477	-0.0980405	-0.0519263	-0.0603629
Alg2	0.796658	0.845746	0.901032	0.991225	-0.0361561	0.0292591	0.0584883	-0.00692686
Alyref	0.0166457	0.0032006	0.995721	0.949082	0.428382	0.458191	-0.00399224	-0.0338015
Amdhd2	0.0589924	0.0748144	0.995721	0.818151	0.260798	0.171761	-0.00405648	0.0849803
Ank1	0.0577657	0.507192	0.765738	0.818151	-0.679832	0.475017	0.585689	-0.569159
Ank3	0.0288452	0.0130188	0.920835	0.995485	-0.305201	-0.271508	0.035634	0.00194095
Ano6	0.0258646	0.00842875	0.899934	0.892538	-0.298739	-0.294471	0.0512231	0.0469553
Anp32a	0.0141577	0.241864	0.79203	0.878408	0.283058	0.125371	-0.0935702	0.0641169
Anp32b	0.00148317	0.0208552	0.734146	0.550838	0.563081	0.259264	-0.141188	0.162628
Anxa1	0.00748883	0.00187367	0.848133	0.959593	-0.480268	-0.552064	-0.0927475	-0.0209521
Anxa11	0.00261965	0.000585353	0.845765	0.912241	-0.52192	-0.634129	-0.0592386	0.052971
Anxa4	0.000910026	0.000183579	0.953953	0.893734	-0.7356	-0.65951	0.0276063	-0.0484829
Anxa5	0.00346017	0.00229193	0.83528	0.820759	-0.553007	-0.394097	0.0723256	-0.0865843
Ap1b1	0.237546	0.233427	0.802332	0.863623	-0.140976	-0.138753	0.0909192	0.0886967
Ap2a1	0.795551	0.0486173	0.887621	0.8213	-0.0336286	-0.164273	-0.0418843	0.0887599
Ap3b1	0.00593243	0.00187563	0.715358	0.831495	0.407569	0.467639	0.149392	0.0893218
Apeh	0.0721256	0.983745	0.829767	0.807654	-0.254587	0.00431452	0.115652	-0.14325
Apex1	0.00489723	0.00116863	0.988876	0.721791	0.447048	0.566388	0.00962535	-0.109714
Api5	0.00201195	0.000690511	0.911633	0.82429	0.574997	0.461936	-0.0379941	0.0750666
Apoa1	0.897766	0.202362	0.899172	0.793524	-0.0485914	0.482579	0.14906	-0.38211
Apoa4	0.0735442	0.326166	0.809367	0.0614207	-0.553457	0.25641	-0.25135	-1.06122
Apod	0.0109775	0.00051086	0.984037	0.804052	-0.685593	-0.812732	0.0175432	0.144682
Apoe	0.639724	0.0381175	0.67432	0.867739	-0.100374	0.527631	0.506072	-0.121933
Apoo	0.165389	0.00239563	0.983132	0.734939	-0.362672	-0.603602	-0.0246508	0.216279
Arcn1	0.00050131	0.000121075	0.839161	0.840724	0.739176	0.73383	0.0608408	0.0661864
Arhgap44	0.00235423	0.00408335	0.858441	0.924	-0.692522	-0.686466	0.0788763	0.0728203
Arhgdib	0.0207142	0.281995	0.995721	0.804052	-0.360833	-0.236263	-0.00796457	-0.132534
Arl2	0.540132	0.329185	0.975437	0.987797	-0.0634426	-0.0850746	-0.0147973	0.00683468
Arpc1a	0.00273974	0.000690511	0.983132	0.92672	-0.496195	-0.469023	-0.00946311	-0.0366348
Arpc1b	0.783053	0.386775	0.821632	0.934717	-0.0319628	0.0823192	0.0829162	-0.0313658
Arpc2	0.656961	0.410599	0.770217	0.953549	-0.0534643	0.0703955	0.097817	-0.0260428
Arpc3	0.0600626	0.108202	0.718858	0.915679	-0.417148	-0.299116	0.216559	0.0985273
Arpc4	0.345135	0.316986	0.921614	0.991225	-0.106236	-0.158462	-0.0442466	0.00797931
Asah1	0.0207386	0.0693939	0.969919	0.659725	0.304424	0.172163	0.0185907	0.150851
Asl	0.0389003	0.00805493	0.841728	0.942964	-0.239216	-0.272097	-0.0586593	-0.025778
Aspn	0.000430916	3.97323e-05	0.954024	0.557682	-1.18061	-1.43271	-0.0375862	0.214522
Asrgl1	0.359564	0.057085	0.777739	0.550403	-0.0969449	0.162729	0.103184	-0.15649
Ass1	0.000430916	6.76678e-05	0.983132	0.454966	-1.2907	-1.10109	-0.0168573	-0.206466
Atg3	0.00681172	0.138715	0.910208	0.6794	-0.345225	-0.160895	0.0415057	-0.142824
Atic	0.00981766	0.00164945	0.97714	0.942206	-0.409753	-0.403258	-0.0181897	-0.0246843
Atp1a1	0.0147218	0.00079261	0.849279	0.965725	-0.449833	-0.541431	-0.0681801	0.0234179
Atp1a2	0.0977621	0.00707438	0.886518	0.994025	-0.23429	-0.293569	-0.0567731	0.00250575
Atp1a3	0.108685	0.0515913	0.802332	0.872553	-0.181149	-0.205305	-0.0898873	-0.0657314
Atp1b1	0.00652066	0.00198768	0.995982	0.893734	-0.469926	-0.413131	-0.00309977	-0.0598949
Atp1b3	0.268473	0.00704986	0.759492	0.994025	-0.170145	-0.273933	-0.107053	-0.00326424
Atp2b2	0.0260109	0.000785114	0.886518	0.818151	-0.340101	-0.483359	-0.0545808	0.0886771
Atp6v0c	0.0275583	0.0584551	0.950301	0.994025	0.457931	0.525104	0.0723292	0.00515636
Atp6v0d1	0.236074	0.302751	0.978219	0.863623	0.192916	0.114694	0.0191301	0.0973519
Atp6v1a	0.00600846	0.00169597	0.821632	0.981887	-0.487463	-0.422204	0.0757045	0.0104453
Atp6v1b2	0.0082338	0.000783931	0.954444	0.960082	-0.444382	-0.441986	0.0239566	0.0215613
Atp6v1c1	0.551146	0.145795	0.991543	0.912241	-0.0919246	-0.15484	-0.00888328	0.0540321
Atxn10	0.261341	0.0328125	0.994416	0.856158	0.116449	0.18757	0.00346031	-0.0676612
Atxn2l	0.0155912	0.00150318	0.753606	0.818151	0.391712	0.446952	0.145193	0.0899532
Auh	0.00227766	0.000256373	0.817314	0.923848	-0.52812	-0.638722	-0.0712581	0.0393436
Avil	0.034841	0.00137749	0.982275	0.954888	-0.426727	-0.405504	-0.0133826	-0.0346057
Bag3	0.00556142	0.00135595	0.860861	0.966683	-0.676261	-0.62421	0.079257	0.0272067
Banf1	0.774653	0.596402	0.67432	0.705037	-0.0495625	0.188906	-0.262682	-0.50115
Basp1	0.193332	0.114798	0.920925	0.820759	0.308968	0.375118	-0.102265	-0.168415
Bax	0.125971	0.00705223	0.817314	0.965603	0.203361	0.269421	0.0843994	0.0183387
Bcam	0.000450263	2.69711e-05	0.98313	0.845011	-1.01066	-1.07014	0.0123432	0.0718232
Bcas1	0.00291788	0.000739311	0.685111	0.994025	-0.775089	-0.57471	0.203846	0.00346714
Bcas3	0.406482	0.289527	0.970398	0.97368	-0.126894	-0.127326	0.0215853	0.0220171
Bcat1	0.000699651	0.000168341	0.995982	0.921643	-0.73852	-0.70075	0.00161172	-0.0361587
Bin1	0.185097	0.0176208	0.718858	0.936431	-0.311314	-0.618766	-0.218056	0.0893955
Bsg	0.195684	0.527937	0.927824	0.911771	-0.138057	-0.058018	0.0332338	-0.046805
Bub3	0.005825	0.012079	0.978219	0.442177	0.455114	0.256886	0.0140113	0.21224
Bzw2	0.00101029	0.000138537	0.887231	0.978987	1.08822	1.13447	0.0637106	0.0174602
C1qbp	0.175617	0.0854729	0.759749	0.728985	-0.250342	-0.289178	0.185542	0.224379
C3	0.533646	0.0012635	0.889653	0.0180123	-0.130473	0.690258	-0.0852745	-0.906006
C4b	0.031749	0.00228579	0.718858	0.882522	-0.481521	-0.332166	0.226138	0.0767824
Ca2	0.0370034	0.832191	0.799883	0.760675	-1.03609	0.155161	0.526824	-0.664426
Ca3	0.0335434	0.0471473	0.993668	0.794325	-1.59429	-1.01295	-0.0210163	-0.602349
Cacna2d1	0.11905	0.00488364	0.717496	0.994025	-0.607517	-0.972416	-0.376103	-0.0112046
Cacybp	0.0131521	0.0193653	0.787287	0.981887	-0.382061	-0.253619	0.120115	-0.00832716
Cad	0.00327757	0.000494002	0.995665	0.926332	0.50638	0.475532	0.00345617	0.0343043
Cadm1	0.0510918	0.00920191	0.797314	0.989074	-0.464683	-0.592758	-0.142011	-0.0139353
Cadm4	0.00132386	0.0144217	0.79553	0.709823	-0.615671	-0.372817	0.138063	-0.104791
Cadps	0.0106583	0.00140799	0.970236	0.978987	-0.473756	-0.466259	0.0207397	0.0132421
Calb2	0.000608479	0.00010948	0.957727	0.880564	-1.05063	-0.946898	0.0331176	-0.0706111
Calca	0.00353867	0.832984	0.979288	0.066161	0.702135	-0.0422888	0.023741	0.768164
Calr	0.113953	0.0101826	0.777739	0.876484	0.239074	0.511547	0.1798	-0.0926727
Camk2b	0.610888	0.569239	0.83534	0.93462	0.0838269	-0.102621	-0.139645	0.0468024
Camk2d	0.087132	0.0114323	0.991995	0.947738	-0.206919	-0.238213	-0.00496592	0.0263287
Camk2g	0.0161378	0.00145583	0.829767	0.937385	-0.367259	-0.479303	-0.0784453	0.0335982
Cand1	0.106615	0.0159007	0.887872	0.97791	-0.192075	-0.246885	-0.0409547	0.0138545
Capg	0.00539156	0.00114752	0.954444	0.994025	-0.519208	-0.490564	0.0252652	-0.00337888
Capn2	0.273728	0.342774	0.970016	0.882522	-0.138131	-0.0953307	-0.0239465	-0.0667464
Capzb	0.196087	0.00866981	0.875258	0.956183	-0.300878	-0.410607	-0.0614264	0.0483025
Carhsp1	0.203423	0.218685	0.664733	0.975496	-0.335321	0.217059	0.528318	-0.024062
Cav2	0.0288917	0.00290809	0.783902	0.981887	-0.602006	-0.840594	-0.217679	0.0209093
Cbl	0.343819	0.513058	0.817547	0.822265	-0.141102	0.0846539	0.103601	-0.122155
Cbr1	0.00194689	0.00430876	0.983132	0.554694	-0.542964	-0.387595	-0.0121122	-0.167482
Cbwd1	0.874225	0.868479	0.912784	0.892538	-0.0492327	0.0442689	-0.0784656	-0.171967
Cbx3	0.00512491	0.00581301	0.787287	0.909903	0.425728	0.684875	0.198338	-0.0608084
Cbx5	0.162506	0.0021931	0.895641	0.862363	0.248372	0.401436	0.050679	-0.102386
Ccar2	0.00164042	0.000652638	0.869836	0.913859	0.549958	0.463759	-0.0514754	0.034723
Ccdc43	0.0320334	0.0151872	0.893176	0.95091	-0.397525	-0.372861	0.0620499	0.0373866
Cd2ap	0.104759	0.0741145	0.956639	0.97791	-0.203362	-0.162759	0.0295996	-0.0110026
Cd44	0.0538755	0.193842	0.717496	0.929761	-0.320957	-0.190162	0.192343	0.0615488
Cd47	0.00819195	0.000604337	0.934781	0.738922	-0.487446	-0.567182	0.0410105	0.120747
Cd81	0.00599489	0.0101967	0.878706	0.912241	-0.674866	-0.690157	-0.106127	-0.0908352
Cd9	0.00788226	0.00237468	0.787287	0.934035	-0.634709	-0.750497	-0.174429	-0.0586405
Cda	0.000469267	0.00051086	0.803682	0.435301	-1.13386	-1.07192	-0.178394	-0.240332
Cdc42bpa	0.168773	0.0109594	0.979655	0.947039	-0.200458	-0.245965	-0.0127952	0.0327125
Cdc42ep4	0.0795408	0.00112288	0.969351	0.820759	-0.389086	-0.527683	-0.041129	0.0974685
Cdk5	0.00412248	0.000282766	0.685111	0.823222	-0.534078	-0.590845	-0.14902	-0.0922533
Cds2	0.0175921	0.00176514	0.787287	0.913859	-0.593141	-0.538389	0.133212	0.0784608
Celf2	0.0110987	0.0029226	0.862867	0.978987	0.501466	0.408452	-0.0820462	0.0109678
Cfb	0.126568	0.067458	0.685111	0.560026	-0.280623	0.307509	0.325443	-0.262689
Cfh	0.294715	0.248318	0.726164	0.888283	-0.178283	0.142441	0.248647	-0.0720762
Cfl1	0.291258	0.550873	0.954444	0.876898	-0.182344	-0.134573	-0.0631776	-0.110949
Chat	0.00164042	4.70816e-05	0.954444	0.966683	-1.00257	-1.01391	-0.0351813	-0.0238392
Chordc1	0.0309423	0.0155425	0.821632	0.940096	-0.295215	-0.356434	-0.097111	-0.0358921
Chp1	0.00332615	0.0135313	0.799492	0.926469	-0.570116	-0.397668	0.125233	-0.0472151
Cisd1	0.0125281	0.00224101	0.826459	0.882522	-0.483895	-0.456989	0.0985304	0.0716243
Ckap4	0.00044135	2.31616e-05	0.647175	0.945337	1.077	1.33822	0.284865	0.0236469
Ckb	0.016905	0.00969148	0.974877	0.929761	-0.435942	-0.368766	0.0227838	-0.0443921
Ckm	0.813263	0.0460106	0.685111	0.995311	-0.389745	-2.04176	-1.67824	-0.0262271
Ckmt1	0.229808	0.0192434	0.767193	0.967482	-0.228509	-0.303459	-0.106599	-0.0316478
Clasp1	0.0735442	0.00882844	0.983132	0.888283	-0.252429	-0.308139	0.0112953	0.0670054
Cldn19	0.0850902	0.055166	0.848133	0.867739	0.22071	0.252563	-0.0615722	-0.0934245
Clic1	0.30846	0.159607	0.862619	0.989074	-0.105113	-0.151876	-0.0539364	-0.00717346
Clic4	0.726732	0.0955265	0.8127	0.892538	0.0454494	0.226544	0.115265	-0.0658294
Clip2	0.454658	0.628507	0.802332	0.934717	-0.0920806	-0.0412439	0.0850222	0.0341854
Clu	0.0116684	0.00031089	0.718858	0.157533	-0.65943	-0.786249	0.281256	0.408075
Cmpk1	0.120463	0.0548302	0.910208	0.930534	-0.215229	-0.208165	-0.0384508	-0.0455146
Cmpk2	0.00337147	0.00049272	0.883001	0.0974175	-0.866572	-0.555169	-0.0847672	-0.39617
Cndp2	0.0187332	0.0431338	0.881172	0.871948	-0.281224	-0.17982	0.047928	-0.0534763
Cnp	0.66232	0.951027	0.922801	0.958554	-0.0566071	0.00645517	0.0403204	-0.0227419
Cnpy2	0.0480178	0.000658167	0.763091	0.833272	0.304557	0.520565	0.129617	-0.0863912
Cnrip1	0.241539	0.32078	0.866102	0.978987	-0.198026	-0.122851	0.089144	0.0139689
Cntf	0.00223615	0.000345522	0.779681	0.990764	-0.602949	-0.72159	-0.112408	0.0062331
Cntfr	0.0121735	0.00483613	0.910208	0.791628	-0.550275	-0.623205	0.0784255	0.151355
Cntn1	0.0379219	0.00311701	0.992147	0.945002	-0.342744	-0.372331	0.00574653	0.0353334
Cntn2	0.00826065	0.000377731	0.98313	0.868602	-0.54824	-0.648344	-0.0150703	0.0850344
Cntnap1	0.0170001	0.000785815	0.826005	0.947039	-0.481684	-0.522519	-0.0785658	-0.0377314
Col11a1	0.0645256	0.0007442	0.95609	0.993201	0.888716	0.963928	0.0614676	-0.0137447
Col12a1	0.0134645	0.630604	0.734578	0.845011	-0.435588	-0.121136	0.392816	0.0783639
Col14a1	0.00135564	0.00010948	0.745004	0.929761	1.14523	1.40485	0.190854	-0.0687665
Col15a1	0.0548654	0.00227226	0.734578	0.969858	-0.281223	-0.447546	-0.14695	0.0193734
Col18a1	0.00158767	0.000242114	0.760379	0.620092	-0.821599	-0.875121	0.148479	0.202001
Col1a1	0.0570631	0.0299945	0.782063	0.592545	0.806491	0.596598	0.317256	0.527148
Col1a2	0.0625078	0.00933283	0.717496	0.709237	0.856264	0.851152	0.4717	0.476811
Col28a1	0.0162272	0.00120087	0.991995	0.955363	0.557337	0.514653	-0.0077038	0.0349795
Col4a1	0.7553	0.102868	0.992955	0.768994	0.0757046	0.322504	0.00908501	-0.237715
Col4a2	0.684125	0.618371	0.951565	0.912241	-0.11324	-0.0363813	-0.0295224	-0.106381
Col5a2	0.0509959	0.000352791	0.62637	0.712677	0.34626	0.506228	0.312277	0.152309
Col6a1	0.00235423	0.00057897	0.821632	0.927475	-0.636869	-0.585677	0.0899949	0.0388024
Copa	0.000573906	0.000226502	0.865695	0.912241	0.738101	0.746122	0.053443	0.0454222
Copb1	0.0006861	7.56151e-05	0.730046	0.985729	0.713961	0.822694	0.116232	0.00749952
Cops2	0.0794979	0.681427	0.791392	0.702652	-0.228568	0.0501064	0.11712	-0.161555
Cops3	0.0839708	0.065698	0.917483	0.888283	-0.193972	-0.180623	-0.0398738	-0.053223
Cops4	0.0358292	0.0166436	0.986161	0.921465	-0.242867	-0.201415	0.00727228	-0.0341803
Coro1b	0.943244	0.995978	0.887872	0.894139	0.0088157	-0.000450599	0.0467455	0.0560118
Coro1c	0.234612	0.0047961	0.759749	0.863623	-0.168045	-0.402858	-0.171851	0.0629623
Coro7	0.244008	0.333584	0.995982	0.924896	-0.118188	-0.0805976	0.00280317	-0.0347873
Cotl1	0.494055	0.349584	0.8684	0.773191	-0.101616	0.101664	0.0707264	-0.132554
Cox5a	0.932556	0.109515	0.647175	0.933596	-0.0358324	-0.451126	-0.538394	-0.123101
Cox6b1	0.155491	0.000393728	0.672855	0.738922	-0.371835	-1.01973	-0.42794	0.219957
Cp	0.00456847	0.059011	0.954024	0.132504	-0.548082	-0.221367	0.0410067	-0.285708
Cplx1	0.0669838	0.902493	0.982252	0.38763	-0.509117	0.0369393	0.0408392	-0.505217
Cpne6	0.00378217	0.000142712	0.995982	0.850789	-0.604566	-0.68604	0.00257436	0.0840478
Crip1	0.0240472	0.041896	0.797314	0.954888	-0.730028	-0.543616	0.244173	0.0577609
Crip2	0.00427791	0.973456	0.67432	0.589699	-0.518757	-0.00602178	0.285119	-0.227616
Crmp1	0.0297857	0.0269199	0.910208	0.893939	-0.429638	-0.294477	0.0569738	-0.078187
Crocc	0.630239	0.410629	0.802332	0.635302	-0.10213	0.141831	-0.111899	-0.355861
Crot	0.596557	0.624223	0.734146	0.726601	-0.0830996	-0.0578899	-0.159021	-0.184231
Cse1l	0.361948	0.0821725	0.940363	0.95091	0.116102	0.179332	0.0354947	-0.0277352
Csnk1a1	0.0755093	0.00367709	0.821632	0.773191	0.241969	0.459264	0.0809182	-0.136378
Csrp1	0.00180436	0.000934728	0.970455	0.882522	-0.861321	-0.825911	-0.0361477	-0.0715571
Ctbp1	0.054269	0.00954312	0.812658	0.926469	0.216607	0.260739	0.0769523	0.0328204
Ctbp2	0.0320437	0.034868	0.827056	0.809903	0.387281	0.322971	0.0869667	0.151277
Ctnna2	0.625669	0.638258	0.997775	0.620092	0.0706503	-0.0641784	0.000978573	0.135807
Ctnna3	0.107216	0.0906558	0.892317	0.999006	-0.216776	-0.174315	0.041614	-0.000847184
Ctnnb1	0.0787118	0.0322665	0.944641	0.95091	-0.188366	-0.244203	-0.0311819	0.024655
Ctnnd1	0.0141396	0.0186863	0.983132	0.863623	-0.312256	-0.236697	0.00939129	-0.0661675
Ctsb	0.605448	0.64328	0.994416	0.980158	-0.0714153	-0.0861667	0.00527773	0.0200292
Ctsc	0.797618	0.410919	0.995982	0.892538	-0.0410506	-0.18247	-0.00190338	0.139516
Ctsd	0.0941488	0.0529731	0.869836	0.993201	0.199232	0.254323	0.0498746	-0.00521617
Ctsz	0.0254502	0.0210591	0.759492	0.856664	0.291004	0.369538	0.162887	0.0843534
Cttn	0.669207	0.550551	0.979288	0.996229	0.04612	0.059938	0.0121753	-0.0016427
Cyb5r3	0.0974638	0.0224133	0.802332	0.911731	0.198526	0.234424	0.0841217	0.0482229
Cyp2j6	0.0109213	0.00282064	0.954444	0.644325	0.709553	0.598219	0.0605347	0.171868
Cyp51a1	0.000213081	7.84334e-06	0.837002	0.911731	2.30744	2.36458	0.123154	0.0660215
Dad1	0.00417969	0.000631367	0.778385	0.924896	0.415559	0.55263	0.099989	-0.0370814
Dag1	0.0394823	0.246776	0.840161	0.768134	-0.317559	-0.116868	0.0706888	-0.130003
Dbi	0.0550455	0.74421	0.791392	0.913859	-0.367196	-0.0703771	0.218945	-0.0778739
Dbn1	0.579774	0.302804	0.759492	0.942206	-0.0682639	0.0810781	0.121664	-0.0276775
Dbnl	0.186799	0.586126	0.91934	0.620092	-0.136579	0.0676567	0.0515279	-0.152707
Dclk1	0.0231049	0.00502268	0.915917	0.936431	-0.418408	-0.338113	0.0345877	-0.0457071
Dcps	0.914097	0.435465	0.970016	0.862837	-0.0150244	0.0826944	0.0253204	-0.0723984
Ddah1	0.00173625	0.000133397	0.794271	0.987797	-0.741447	-0.835787	-0.102365	-0.00802488
Ddost	0.0046253	0.0008129	0.779726	0.978987	0.484046	0.63166	0.136455	-0.0111588
Ddt	0.00138441	0.000458262	0.772008	0.708217	-0.651924	-0.682078	-0.140925	-0.110771
Ddx17	0.00205677	0.00027384	0.995982	0.913859	0.564509	0.601761	-0.00272359	-0.0399756
Ddx39b	0.0169277	0.000819805	0.98313	0.628401	0.473526	0.690652	0.0194075	-0.197719
Ddx3x	0.118624	0.0443002	0.516006	0.308914	0.312358	0.32834	-0.472541	-0.488523
Ddx5	0.00338935	0.00210513	0.987253	0.929927	0.465572	0.42507	-0.00868955	0.0318124
Dek	0.0542048	0.00560273	0.995982	0.577419	0.199169	0.363902	-0.00144127	-0.166174
Dhcr24	0.000450263	8.08471e-05	0.931925	0.804461	1.87439	2.06194	-0.057781	-0.245323
Dhcr7	0.000176854	2.19003e-05	0.777739	0.485002	1.58027	1.99282	0.167045	-0.2455
Dhdh	0.00163928	0.0065876	0.981285	0.628401	-0.672561	-0.452534	0.015784	-0.204242
Dhrs1	0.00877861	0.000458262	0.759749	0.679483	0.392584	0.668236	0.134365	-0.141288
Dhx15	0.00490574	0.00121256	0.983132	0.911731	0.430845	0.380536	-0.00901511	0.0412934
Dhx9	0.00666104	0.000529689	0.875258	0.960861	0.427669	0.456578	0.0473588	0.0184496
Diras2	0.000430916	0.000336295	0.753606	0.946069	-1.32548	-1.1378	0.225276	0.0375993
Dlat	0.0519535	0.000437387	0.76172	0.748803	-0.412395	-0.753559	-0.159621	0.181543
Dlc1	0.514637	0.90828	0.972626	0.863623	0.192579	-0.021935	-0.0320469	0.182467
Dlst	0.161372	0.00580145	0.681871	0.892538	-0.265923	-0.56164	-0.175733	0.119983
Dmd	0.220556	0.0382785	0.72757	0.955363	0.126543	0.252829	0.151671	0.0253849
Dmxl2	0.0291939	0.00894986	0.995982	0.911731	-0.300077	-0.350236	0.00216489	0.0523237
Dnajb4	0.00163928	0.000303201	0.821632	0.965691	-0.706095	-0.827409	-0.100769	0.0205443
Dnajc6	0.00983179	0.00280779	0.855294	0.893734	-0.452469	-0.438629	-0.0576272	-0.0714671
Dnajc7	0.0844276	0.103293	0.985685	0.973351	-0.187161	-0.163547	0.00833182	-0.0152823
Dnm1	0.00269522	0.00031089	0.965546	0.993042	-0.549534	-0.533138	0.0201325	0.0037365
Dnm2	0.764538	0.375795	0.840161	0.959593	0.0307816	0.0896941	0.0765415	0.0176289
Dnm3	0.00539156	0.000260941	0.875258	0.856284	-0.528371	-0.663087	-0.0478481	0.086868
Dpep1	0.00738185	0.000160076	0.994416	0.00143226	-0.665052	-1.7387	-0.0115702	1.06208
Dpp3	0.298617	0.854691	0.826459	0.975538	-0.10496	-0.0175491	0.0757734	-0.0116376
Dpp8	0.601193	0.0282308	0.946878	0.967615	0.131604	0.208608	0.0446164	-0.0323869
Dpysl2	0.00854207	0.00280924	0.993186	0.907672	-0.553577	-0.484218	0.00657844	-0.0627806
Dpysl3	0.0054137	0.00041657	0.820054	0.985099	-0.54735	-0.622362	-0.0844459	-0.00943396
Drp2	0.00448257	0.000103418	0.801305	0.978987	-0.658117	-0.755948	-0.0825716	0.0152587
Dusp14	0.0623118	0.537871	0.759749	0.704203	-1.02893	0.368641	0.791658	-0.605909
Dusp15	0.000653552	5.88737e-05	0.970455	0.919834	-0.939543	-1.00644	-0.0220227	0.0448783
Dync1h1	0.943298	0.86146	0.919913	0.929761	-0.0103964	-0.0151595	0.0347076	0.0394707
Dync1li1	0.252632	0.491987	0.869427	0.969962	-0.132116	-0.0611132	0.0552996	-0.015703
Dynll1	0.0035939	0.122231	0.970236	0.470434	-0.735845	-0.465093	0.0703784	-0.200374
Dynlrb1	0.0251767	0.0065876	0.667076	0.698799	-0.33067	-0.387256	-0.221635	-0.165049
Dynlt3	0.924096	0.330475	0.954444	0.783385	0.0331011	-0.176818	0.0545744	0.264493
Echdc1	0.441918	0.455213	0.802332	0.888283	-0.0909536	-0.0624878	0.086802	0.0583362
Eci1	0.0820647	0.00117882	0.799883	0.789587	-0.376796	-0.690187	-0.13254	0.180851
Eef1a1	0.243084	0.0125704	0.835539	0.969542	0.332734	0.540613	0.174773	-0.033106
Eef1a2	0.317389	0.0381175	0.981585	0.912241	-0.572786	-0.525161	-0.0713046	-0.118929
Eef1b	0.00269682	0.000168834	0.67432	0.945732	0.655969	0.907879	0.215965	-0.0359448
Eef1d	0.026978	0.0104706	0.994416	0.96888	0.296264	0.283999	0.00400339	0.0162682
Eef1g	0.00310467	0.000440018	0.975437	0.965445	0.505937	0.539032	0.017223	-0.0158722
Eef2	0.00520306	0.000966393	0.911633	0.818151	0.425724	0.564261	0.0405857	-0.0979519
Efemp1	0.00459794	0.000377172	0.934781	0.806632	-0.874081	-0.805397	-0.0616621	-0.130346
Efhd2	0.0161378	0.0128728	0.92931	0.945002	-0.397021	-0.323245	0.039157	-0.0346186
Eftud2	0.0170072	0.00601459	0.995982	0.854723	0.406635	0.326774	-0.00325623	0.076604
Egfr	0.0630187	0.0271246	0.516006	0.00104927	0.300564	-0.39946	0.608167	1.30819
Ehd1	0.0098962	0.00232547	0.995418	0.749536	-0.355843	-0.464642	-0.00438729	0.104412
Ehd2	0.00462766	0.000640387	0.98313	0.679934	-0.615529	-0.787937	-0.0201157	0.152292
Ehd3	0.00485077	0.000551274	0.844793	0.989074	-0.571851	-0.647397	-0.0675626	0.00798331
Ehd4	0.00519365	0.00031089	0.995982	0.574622	-0.432108	-0.59856	0.00152347	0.167975
Eif2a	0.0678198	0.0563505	0.995665	0.921465	0.187603	0.151204	-0.00309228	0.0333077
Eif2s1	0.00897095	0.000712985	0.875258	0.888283	0.352465	0.449833	0.0529843	-0.0443833
Eif3a	0.00814374	0.00103845	0.826746	0.927475	0.3719	0.404256	0.0654558	0.0331002
Eif3c	0.00850449	0.00236502	0.87229	0.912241	0.374335	0.388853	0.0558226	0.0413048
Eif3e	0.00342524	0.00146008	0.983132	0.97608	0.429942	0.429522	0.0105731	0.0109924
Eif4a1	0.0189807	0.0041018	0.753606	0.994025	0.406478	0.615559	0.213108	0.00402697
Eif4a3	0.00541247	0.00061483	0.838257	0.98064	0.41256	0.463941	0.0601876	0.00880616
Eif4g1	0.0285366	0.00538245	0.759492	0.929761	0.256501	0.336564	0.1142	0.0341377
Elavl1	0.0199181	0.00283924	0.954444	0.988564	0.392533	0.413708	0.0293152	0.00813969
Emd	0.182857	0.00574976	0.972626	0.815614	-0.206027	-0.320297	-0.0240309	0.0902384
Eml1	0.894583	0.931081	0.981585	0.97791	0.0171546	-0.00785345	-0.0119676	0.0130405
Eml2	0.0391767	0.0152242	0.970583	0.968398	-0.25801	-0.254679	0.0189311	0.0156
Endod1	0.0311785	0.0288675	0.79203	0.863623	-0.304646	-0.258156	0.116072	0.0695821
Eno2	0.000430916	0.000266056	0.970014	0.793286	-1.0183	-0.883926	0.0262485	-0.108122
Entpd2	0.0569523	0.0031654	0.927824	0.734939	-0.321237	-0.426334	0.0455492	0.150646
Epb41	0.00968733	0.991497	0.787287	0.822265	-0.893227	-0.00621372	0.481754	-0.405259
Epb41l2	0.0066281	0.00626564	0.934872	0.924	-0.399918	-0.328359	0.0331421	-0.0384167
Epb41l3	0.00178218	0.000230325	0.869931	0.991778	-0.716774	-0.659058	0.0527527	-0.00496371
Epdr1	0.195087	0.0961028	0.817314	0.361336	-0.151179	0.135978	0.081783	-0.205374
Ephx1	0.00138441	0.000441385	0.841728	0.786833	-0.667004	-0.664713	0.0846521	0.0823608
Eps15l1	0.547285	0.712841	0.894915	0.888283	0.0795071	-0.0362376	-0.042887	0.0728577
Erh	0.116607	0.0119667	0.98786	0.886745	0.31756	0.435551	0.0123995	-0.105592
Esd	0.0041312	0.00132319	0.814702	0.809903	-0.536052	-0.532183	-0.0965428	-0.100411
Esyt1	0.0332705	0.00799616	0.759749	0.738922	-0.2658	-0.271615	0.104327	0.110142
Etf1	0.0185372	0.00102473	0.734146	0.924896	0.291951	0.476412	0.152686	-0.0317751
Etfa	0.282069	0.00552571	0.759492	0.809363	-0.169483	-0.459408	-0.147576	0.142349
Etfb	0.178689	0.0111733	0.778385	0.882522	-0.214268	-0.464369	-0.149893	0.100208
Ezr	0.21955	0.026497	0.753416	0.958144	0.168427	0.252515	0.113144	0.0290556
F13a1	0.473244	0.0244319	0.985685	0.442177	-0.115778	-0.491262	-0.0173311	0.358153
F2	0.101055	0.492726	0.988412	0.333114	-0.320825	0.114069	-0.0129694	-0.447863
Fabp3	0.143329	0.00636857	0.62637	0.73937	-0.411107	-1.50303	-0.554968	0.53696
Fabp5	0.629987	0.512138	0.779681	0.798116	-0.0870944	-0.0970215	-0.166409	-0.156482
Fam114a2	0.00103746	0.0409359	0.645443	0.78787	-0.608989	-0.264433	0.234594	-0.109961
Fam98b	0.0284344	0.00274247	0.9289	0.920368	0.279617	0.351561	0.0332339	-0.0387108
Farsb	0.0663419	0.212748	0.79553	0.996918	0.20003	0.117042	-0.0841405	-0.00115241
Fasn	0.194144	0.0100668	0.878706	0.370518	0.216566	0.375274	-0.0875824	-0.246291
Fbl	0.0288917	0.0304371	0.911617	0.985699	0.339041	0.282712	-0.0461879	0.0101412
Fbln5	0.0938969	0.0531659	0.79553	0.728985	-0.271312	-0.277754	-0.153517	-0.147074
Fdps	0.00318412	2.19003e-05	0.753606	0.749536	0.737789	1.0013	0.12153	-0.141979
Fga	0.924096	0.0231686	0.62637	0.895444	-0.0251115	0.809806	0.689575	-0.145343
Fgb	0.779432	0.0275276	0.62637	0.864035	-0.065678	0.894436	0.75227	-0.207844
Fgf1	0.0102482	0.000254231	0.853731	0.513829	-0.756874	-0.639044	-0.115168	-0.232998
Fgg	0.813263	0.0100814	0.62637	0.829598	0.056006	0.958484	0.688039	-0.214439
Fh	0.371536	0.0121732	0.734146	0.863623	-0.150262	-0.439428	-0.164765	0.124401
Fkbp3	0.553426	0.064125	0.983132	0.862361	0.104628	0.208241	0.0176234	-0.0859896
Fkbp4	0.0152638	0.67839	0.717496	0.818151	-0.290011	-0.0474077	0.139993	-0.10261
Flna	0.0816764	0.115176	0.849381	0.964083	-0.421806	-0.319358	0.140711	0.0382625
Flot2	0.0388061	0.00290036	0.841728	0.915679	-0.311182	-0.317755	-0.0561659	-0.0495925
Fmod	0.0040428	0.0199907	0.821632	0.681619	-0.55946	-0.567346	0.176076	0.183962
Fn1	0.993279	0.000784241	0.62637	0.248544	-0.00109756	0.479966	0.235374	-0.24569
Fn3krp	0.0132057	0.665867	0.791392	0.726601	-0.552275	-0.0968561	0.175622	-0.279797
Fnta	0.750787	0.0150179	0.647175	0.767833	-0.0506711	0.302637	0.19485	-0.158459
Fscn1	0.940392	0.122877	0.970236	0.735562	0.0109927	0.181719	0.0227644	-0.147962
Fsd1l	0.0035939	0.000844475	0.997775	0.901555	-0.556512	-0.617619	0.000487912	0.0615945
Fstl1	0.232419	0.578109	0.968966	0.899391	0.199372	0.0803304	-0.0247537	0.0942876
Ftl1	0.00269682	0.00247488	0.725809	0.845011	-1.33323	-2.16248	-0.437706	0.391535
Fus	0.0525754	0.00126343	0.844793	0.924	0.260542	0.362329	0.0686287	-0.0331586
Fxyd2	0.0240472	0.0741145	0.953627	0.774129	-0.413402	-0.554891	0.0798847	0.221374
Gabarapl2	0.00866734	0.000574568	0.912784	0.983497	-0.55574	-0.612151	-0.0439464	0.0124653
Ganab	0.0308309	0.00126343	0.79203	0.902515	0.277617	0.417373	0.092148	-0.0476086
Gas7	0.365491	0.928006	0.753606	0.981887	-0.152374	0.00934179	0.173231	0.0115157
Gatm	0.367557	0.0935425	0.698955	0.804052	-0.119751	0.210912	0.210147	-0.120516
Gclc	0.00188153	0.00715563	0.889635	0.620381	-0.816292	-0.513134	0.0751336	-0.228025
Gclm	0.00396713	0.0190765	0.850989	0.658498	-0.675207	-0.377209	0.0920688	-0.205929
Gdi1	0.0139507	0.00197272	0.992686	0.904811	-0.437337	-0.386538	-0.00573481	-0.056534
Git1	0.250015	0.802955	0.995982	0.783375	0.141485	0.0241031	0.00136252	0.118745
Glipr2	0.00983179	0.00103861	0.899934	0.96897	0.372164	0.430494	0.0436952	-0.0146356
Glod4	0.0271186	0.0240358	0.972626	0.795724	-0.293926	-0.225479	-0.01852	-0.0869668
Glrx3	0.00259028	0.00803814	0.972385	0.705037	-0.486343	-0.375132	-0.019933	-0.131143
Glrx5	0.946041	0.966692	0.931749	0.945262	-0.0222585	-0.0172151	-0.0970664	-0.10211
Gna11	0.0653296	0.005595	0.857823	0.738922	-0.17994	-0.34682	-0.0478566	0.119023
Gna12	0.101438	0.0239924	0.824757	0.982442	-0.245772	-0.341892	-0.0819034	0.0142163
Gnai1	0.0726292	0.0270095	0.954444	0.888283	-0.284153	-0.250026	-0.0338215	-0.0679481
Gnao1	0.0575475	0.00367852	0.775228	0.927475	-0.261989	-0.415787	-0.106002	0.0477967
Gnaq	0.0270938	0.00537134	0.897615	0.944198	-0.387727	-0.479087	-0.0434609	0.0478995
Gnpda2	0.197769	0.0372609	0.717496	0.48074	-0.197116	-0.207153	-0.213857	-0.203821
Golph3	0.125648	0.142831	0.934872	0.911731	0.23151	0.276261	-0.0470136	-0.0917641
Gorasp2	0.00227501	0.000942331	0.791392	0.875936	0.518265	0.546569	0.0950512	0.066747
Got1	0.000589839	5.1171e-05	0.718858	0.892538	-0.984603	-1.07867	-0.162561	-0.0684887
Got2	0.016693	0.000570719	0.753606	0.844621	-0.42238	-0.645252	-0.112747	0.110125
Gpc1	0.0145086	0.00346542	0.809178	0.955363	-0.31762	-0.423867	-0.0811446	0.0251024
Gpc6	0.000703671	0.00198543	0.87861	0.829598	-0.842513	-0.668138	0.0843044	-0.0900704
Gpcpd1	0.0631148	0.0118222	0.827056	0.954888	-0.29019	-0.44712	-0.130603	0.0263265
Gpi	0.00460962	0.00318977	0.875258	0.937722	-0.698932	-0.707374	-0.0695413	-0.0610996
Gps1	0.0383254	0.180693	0.734146	0.936431	-0.261828	-0.100405	0.135036	-0.0263874
Gpx4	0.00337301	3.97323e-05	0.786961	0.893734	-0.736699	-0.926412	-0.12941	0.0603029
Gpx7	0.000450263	2.31616e-05	0.817314	0.872351	1.6152	1.84729	0.112225	-0.119863
Grhpr	0.00259028	0.00502439	0.936965	0.606334	-0.608857	-0.445199	-0.0388562	-0.202514
Grn	0.629261	0.00352169	0.753416	0.791658	0.267368	-0.562225	-0.481707	0.347886
Gspt1	0.293973	0.0347929	0.734578	0.936431	0.154397	0.346732	0.233201	0.0408663
Gsta4	0.000450263	0.000725505	0.970926	0.508151	-1.19012	-0.92576	0.0348475	-0.229513
Gstm5	0.00784746	0.112963	0.911091	0.513248	-0.372025	-0.224105	-0.0583293	-0.206249
Gstp1	0.010667	0.0074421	0.995982	0.899131	-0.410149	-0.345188	0.00201839	-0.0629423
Gyg1	0.0210496	0.0128367	0.767396	0.845011	-0.720395	-0.649927	-0.152315	-0.222783
Hadh	0.976766	0.472347	0.954024	0.854723	-0.0068743	-0.0921085	0.0373623	0.122596
Hadhb	0.828532	0.0395259	0.862867	0.733612	-0.0368257	-0.291861	-0.0781681	0.176868
Hba	0.0543749	0.646966	0.817547	0.73937	-0.917121	0.358759	0.506777	-0.769103
Hdgf	0.985874	0.266603	0.954024	0.658498	-0.00261947	0.121864	-0.0303361	-0.154819
Hdhd2	0.140605	0.370658	0.964268	0.756422	-0.201941	-0.108536	-0.0323006	-0.125706
Hdlbp	0.00139254	7.41924e-05	0.67432	0.974147	0.640132	0.809992	0.182416	0.0125564
Hebp2	0.000430916	2.31616e-05	0.933411	0.91659	-1.44517	-1.42677	-0.0394404	-0.0578469
Hexa	0.138972	0.126648	0.79553	0.973604	-0.202532	-0.136336	0.0840326	0.0178367
Hexb	0.0364546	0.00156291	0.987997	0.91659	-0.346193	-0.393443	0.0072788	0.0545285
Hibadh	0.0231049	0.00056222	0.954024	0.513248	-0.307072	-0.529825	-0.0256502	0.197103
Hm13	0.0330965	0.945129	0.965699	0.658042	0.356166	-0.0194731	-0.0477324	0.327907
Hmgb1	0.954769	0.173784	0.992955	0.610251	-0.0102343	0.236883	-0.00878928	-0.255907
Hmgcs1	0.000176854	2.33728e-06	0.848133	0.811046	2.18074	2.38418	0.0716499	-0.131788
Hnrnpa1	0.0200777	0.000494058	0.817314	0.888743	0.541567	0.759956	0.159468	-0.0589213
Hnrnpa2b1	0.0174177	0.00993947	0.983686	0.945002	0.310427	0.34977	0.0124016	-0.0269408
Hnrnpa3	0.0129837	0.0033814	0.868627	0.663083	0.464573	0.814129	0.114502	-0.235054
Hnrnpab	0.158685	0.0210602	0.995671	0.63919	0.235862	0.402984	0.00743234	-0.15969
Hnrnpc	0.0100107	0.000280525	0.734578	0.924243	0.4523	0.647671	0.153427	-0.0419441
Hnrnpd	0.00902425	0.0110483	0.791392	0.945002	0.341597	0.274099	-0.0926207	-0.0251222
Hnrnph1	0.0193839	0.149206	0.647175	0.930212	0.377854	0.146553	-0.267912	-0.0366108
Hnrnpk	0.00788226	0.00531764	0.984037	0.899131	0.338075	0.285975	-0.00830406	0.0437961
Hnrnpl	0.00263721	0.0120003	0.761101	0.989074	0.490082	0.369997	-0.112435	0.0076497
Hnrnpm	0.00357731	0.00137632	0.984037	0.958144	0.442817	0.415495	-0.00970961	0.0176129
Hnrnpu	0.024429	0.00634284	0.96878	0.997684	0.291875	0.317619	0.0249113	-0.000832285
Hnrnpul2	0.0097731	0.000540732	0.92276	0.867739	0.37763	0.473173	0.0320591	-0.0634839
Hook3	0.347903	0.715886	0.951551	0.720586	0.0974117	0.0259386	0.0266159	0.098089
Hp	0.264784	0.178906	0.615745	0.107424	-0.503887	-1.82467	3.12387	4.44466
Hp1bp3	0.73476	0.868605	0.920202	0.965725	0.0381425	-0.016206	-0.0364941	0.0178544
Hprt1	0.0046253	0.000571666	0.759749	0.840797	-0.544697	-0.593056	-0.133868	-0.0855086
Hpx	0.198835	0.378468	0.696787	0.606334	-0.360465	-0.314875	0.579602	0.534012
Hsd17b11	0.284968	0.289481	0.995982	0.929761	0.115956	0.0847328	0.00200987	0.0332329
Hsd17b12	0.000965129	0.000377731	0.92002	0.831495	0.696391	0.670945	0.0444317	0.0698774
Hsd17b4	0.00630727	0.000438522	0.73056	0.957328	0.407943	0.561829	0.132523	-0.0213629
Hsd17b7	0.000602463	4.22307e-05	0.901848	0.738922	1.058	1.26006	0.0541584	-0.147901
Hsp90aa1	0.00854207	0.00692591	0.821632	0.9944	-0.466253	-0.368354	0.0953381	-0.00256155
Hsp90ab1	0.611177	0.0614228	0.841728	0.853481	0.0564079	0.198767	0.0769664	-0.0653922
Hsp90b1	0.0332705	0.00161478	0.750914	0.869077	0.262956	0.476177	0.157831	-0.0553899
Hspa12a	0.0108263	0.00232746	0.928016	0.973604	-0.421426	-0.403922	0.0342244	0.0167202
Hspa4l	0.0172096	0.00609446	0.797314	0.916801	-0.361632	-0.327523	0.0836064	0.0494973
Hspa8	0.0250852	0.0093087	0.910208	0.892538	-0.264465	-0.267433	0.0410995	0.0440676
Hspa9	0.131003	0.00981089	0.989219	0.728985	-0.186212	-0.353171	-0.00648308	0.160476
Hspb1	0.0013628	6.78343e-05	0.978219	0.513248	-1.02783	-1.29496	-0.0263407	0.240792
Hspb8	0.00649034	0.00031089	0.427303	0.824712	-0.451555	-0.911719	-0.33224	0.127925
Hspg2	0.432871	0.21625	0.875258	0.92594	-0.104359	-0.110437	-0.0523234	-0.046246
Hsph1	0.00551071	0.000910829	0.978219	0.756422	-0.471642	-0.58363	0.0160935	0.128082
Hyou1	0.026978	0.0042742	0.838257	0.984538	0.26814	0.320136	0.0595121	0.0075161
Iah1	0.457766	0.206585	0.773671	0.875206	-0.0862851	-0.149031	-0.134699	-0.0719532
Idh1	0.798468	0.301143	0.992686	0.806194	0.0285518	0.116012	-0.00628363	-0.093744
Idh2	0.975286	0.0170111	0.685111	0.584583	-0.00422632	-0.601823	-0.232594	0.365003
Idi1	0.000699651	1.83494e-05	0.759492	0.478794	1.14734	1.56774	0.171414	-0.248991
Igfbp6	0.00887343	0.0183403	0.62637	0.834835	-0.814946	-0.621778	0.413567	0.220399
Ighm	0.0329296	0.188513	0.82661	0.863623	-1.37524	-0.677555	0.241125	-0.456558
Ilf3	0.00196321	0.000964627	0.892317	0.998971	0.575501	0.527561	-0.0471528	0.000787332
Immt	0.0288452	0.00233861	0.975437	0.795724	-0.326519	-0.461569	-0.0177027	0.117347
Impa1	0.00326333	0.000881791	0.978219	0.728985	-0.563192	-0.440176	0.0172284	-0.105788
Ina	0.0521781	0.00198768	0.741941	0.929761	-0.287624	-0.469301	-0.135653	0.0460246
Inpp1	0.0886379	0.193647	0.817547	0.574754	-0.178683	-0.124454	-0.0881547	-0.142384
Inpp5f	0.987857	0.608405	0.974454	0.929927	-0.00288719	0.0716343	0.017136	-0.0573855
Ipo4	0.327376	0.152737	0.942048	0.999006	0.125582	0.152388	0.0273784	0.000572227
Ipo7	0.0774632	0.0226504	0.970455	0.937385	0.244838	0.26916	-0.0164822	-0.0408045
Iqgap1	0.798148	0.685494	0.839161	0.88485	0.0302051	0.0384209	0.0677565	0.0595407
Iqgap2	0.236074	0.0290052	0.970455	0.738333	-0.138544	-0.273365	0.0172558	0.152077
Islr	0.488602	0.628507	0.875258	0.934035	0.0731846	0.0474173	-0.0571346	-0.0313673
Isoc1	0.00512164	0.0032006	0.850989	0.980405	-0.392395	-0.475079	-0.0724695	0.0102136
Isoc2a	0.0165393	0.00913542	0.996975	0.849476	-0.758158	-0.880614	0.00261746	0.125073
Isyna1	0.00733566	8.30802e-05	0.810317	0.790663	-0.63626	-0.864965	-0.13084	0.0978652
Itga6	0.0285233	0.00184322	0.955448	0.829598	-0.282773	-0.384031	-0.0245991	0.0766584
Itgb4	0.00551071	0.000393728	0.954444	0.83825	-0.502917	-0.617968	-0.0285693	0.0864818
Itih4	0.134842	0.192762	0.887872	0.328446	-0.262099	0.226107	0.0883828	-0.399824
Itih5	0.00294511	0.000229186	0.894359	0.959593	0.61114	0.679	0.0440755	-0.0237843
Itm2c	0.209322	0.0830977	0.734578	0.708217	0.367162	0.275426	0.236917	0.328652
Itpa	0.0109692	0.711892	0.834749	0.513829	-0.379881	-0.0584461	0.119102	-0.202333
Itpr3	0.00264451	0.000158002	0.970583	0.78787	0.653561	0.797409	0.0172437	-0.126604
Jam3	0.00202074	0.00194756	0.982006	0.97608	-0.624405	-0.591304	0.0171283	-0.015973
Jpt1	0.00188153	0.171869	0.759749	0.620092	-0.939329	-0.335468	0.229492	-0.374369
Jup	0.313447	0.00622939	0.857846	0.876898	-0.631756	-0.360371	-0.0754436	-0.346829
Kcna1	0.0670084	0.0626432	0.734146	0.903902	-0.421303	-0.293244	0.224357	0.0962975
Kcna6	0.348815	0.980987	0.748281	0.989074	0.201278	-0.00449195	-0.218334	-0.012564
Kcnab2	0.00826065	0.00143327	0.978564	0.915679	-0.472392	-0.542866	-0.0174945	0.0529793
Khdrbs1	0.0797104	0.0021903	0.79203	0.391441	0.260215	0.723638	0.171291	-0.292132
Khsrp	0.492231	0.8943	0.753416	0.898323	0.104728	0.0163114	-0.159222	-0.0708053
Kif21a	0.00903388	0.000417181	0.98082	0.929761	-0.519358	-0.580655	-0.0116786	0.0496182
Kif5b	0.131854	0.0101395	0.820054	0.995823	0.177124	0.261628	0.0859073	0.0014033
Kif5c	0.0173413	0.00228736	0.984037	0.966116	-0.348634	-0.375728	-0.0099959	0.0170979
Kng1	0.0300124	0.429951	0.848731	0.0750873	-0.484935	-0.12767	-0.138343	-0.495608
Kras	0.0223356	0.0119667	0.734146	0.95091	-0.456293	-0.349354	0.146707	0.0397676
Ktn1	0.177992	0.0025578	0.849279	0.774129	0.194787	0.382447	0.0680946	-0.119565
L1cam	0.00479465	0.00195329	0.786961	0.876223	-0.683663	-0.4741	0.11671	-0.0928528
Lama5	0.000430916	3.97323e-05	0.717496	0.513248	-1.3066	-1.296	0.221165	0.210563
Lamb2	0.00118898	2.31616e-05	0.952362	0.822265	-0.938786	-1.06648	-0.0324563	0.0952404
Lamp1	0.133592	0.025795	0.67432	0.942206	0.205994	0.395288	0.236553	0.047258
Lamp2	0.0504585	0.176232	0.829767	0.820429	0.196978	0.173836	0.0788194	0.101961
Lap3	0.99869	0.61506	0.985685	0.929761	0.00021925	0.0473564	0.00872991	-0.0384072
Lcp1	0.00132386	0.00041155	0.971664	0.911406	-0.655697	-0.627879	-0.0187733	-0.0465921
Ldhb	0.00189599	0.00130026	0.888666	0.913142	-0.556756	-0.466491	0.0470207	-0.0432444
Lgals1	0.0334434	0.00212069	0.897615	0.896753	-0.470537	-0.631249	-0.0853362	0.0753758
Lgi3	0.00129702	0.000194332	0.777739	0.850789	-0.695499	-0.723278	-0.103849	-0.0760704
Lgmn	0.00181569	0.064358	0.952004	0.645444	0.667685	0.376226	0.0272864	0.318745
Limch1	0.217444	0.159024	0.952004	0.892538	-0.176534	-0.142085	-0.033396	-0.0678459
Lman2	0.168216	0.0100687	0.82265	0.738922	0.196345	0.441149	0.133673	-0.111131
Lmna	0.0111606	0.00177178	0.983132	0.756422	-0.355092	-0.457916	0.0108746	0.113698
Lmnb1	0.208263	0.0932284	0.959429	0.946143	0.150195	0.146051	-0.0276755	-0.0235322
Lmnb2	0.00788226	0.00072922	0.995982	0.748803	-0.420145	-0.530098	-0.00324726	0.106705
Lrp1	0.352823	0.546977	0.825126	0.734939	0.0987771	0.0550455	0.0725109	0.116242
Lrrc57	0.00235423	0.000357279	0.685111	0.88485	-0.53546	-0.773956	-0.163697	0.074799
Lrrc59	0.000430916	6.33378e-05	0.841102	0.738333	0.866903	1.05032	0.0698123	-0.113606
Lrsam1	0.00630727	0.000587709	0.979824	0.936698	-0.519382	-0.543278	0.0137839	0.0376807
Lsm2	0.208694	0.194985	0.717477	0.6794	0.28578	0.222698	0.252276	0.315359
Lsm4	0.308675	0.608968	0.994416	0.988564	0.122292	0.103149	-0.00800764	0.0111349
Lta4h	0.0251767	0.205608	0.978219	0.55555	-0.269374	-0.132148	-0.0177738	-0.155
Lum	0.00187975	0.000134111	0.791392	0.665544	-0.657211	-0.926749	-0.118991	0.150547
Magoh	0.0141976	0.0038611	0.841728	0.804052	0.418678	0.393898	0.0790672	0.103847
Maoa	0.0941488	0.0300447	0.799883	0.728985	-0.165125	-0.195541	0.0753122	0.105728
Map1b	0.00722147	0.00282064	0.811981	0.822265	-0.48035	-0.46429	0.106458	0.0903986
Map2k2	0.259901	0.474792	0.82661	0.73937	-0.210666	0.152962	0.183496	-0.180132
Map2k4	0.0264285	0.0141223	0.878706	0.816986	-0.385231	-0.334677	-0.0653442	-0.115898
Map4	0.327993	0.414484	0.805868	0.809903	-0.0993553	0.0894617	0.106153	-0.0826641
Map7d1	0.129492	0.0419949	0.975539	0.915338	-0.174626	-0.205524	0.0151643	0.0460626
Map7d2	0.00748883	0.00423275	0.967335	0.978987	-0.516102	-0.502632	0.028713	0.015243
Mapk3	0.00558888	0.00566926	0.814702	0.884653	-0.525197	-0.37071	0.0753565	-0.0791307
Mapre2	0.100954	0.018468	0.953627	0.907295	-0.366241	-0.251937	0.0484344	-0.0658693
Mapre3	0.0121397	0.000305941	0.757576	0.978987	-0.42123	-0.517441	-0.108125	-0.0119139
Mapt	0.00179064	0.000734175	0.894359	0.911771	-0.686493	-0.582855	0.0518845	-0.0517527
Marcks	0.648325	0.512626	0.912771	0.815161	-0.328157	0.351498	0.341174	-0.338482
Matn2	0.00536085	0.000819805	0.698955	0.924	0.609008	0.749989	0.204152	0.0631722
Matr3	0.00610508	0.00114461	0.821632	0.829598	0.46024	0.443341	0.0701714	0.087071
Mbd1	0.86955	0.114952	0.970398	0.665535	0.0657934	0.320412	-0.0640708	-0.31869
Mcam	0.651675	0.673718	0.717496	0.658042	0.0712921	0.0471042	0.184951	0.209139
Mcpt4	0.000928481	0.000558021	0.911617	0.862363	-2.19593	-2.59027	-0.206852	0.187485
Mcts1	0.26821	0.171893	0.767396	0.814557	-0.111811	-0.117234	-0.0929653	-0.0875422
Mdh1	0.00159876	0.000275927	0.79203	0.965691	-0.692778	-0.785874	-0.113257	-0.0201608
Mdh2	0.130014	0.00092141	0.62637	0.845011	-0.257927	-0.695001	-0.306829	0.130245
Mdp1	0.39466	0.330914	0.778385	0.789655	-0.126151	-0.123888	-0.137961	-0.140224
Mfap5	0.0454417	7.14782e-05	0.667241	0.915679	-0.88317	-1.65925	-0.671798	0.104283
Mical1	0.0513251	0.000715852	0.734146	0.993867	0.318505	0.453492	0.130731	-0.00425557
Mical3	0.352851	0.0571115	0.981663	0.886745	-0.111673	-0.192062	-0.0127545	0.0676344
Mif	0.0177419	4.43355e-05	0.427303	0.989074	-0.533325	-1.11286	-0.587714	-0.00818219
Mpi	0.0226019	0.0467179	0.931765	0.804052	-0.349565	-0.291971	-0.0510758	-0.10867
Mpz	0.0021714	0.00210513	0.912784	0.96054	-0.976646	-0.856743	0.0869251	-0.0329776
Mrc1	0.7537	0.0160851	0.875258	0.0411375	0.0494719	-0.433572	0.0945184	0.577563
Mtap	0.00412248	0.0149357	0.850989	0.863623	-0.436706	-0.303239	0.0650673	-0.0683997
Mtdh	0.0124748	0.00133112	0.809178	0.985615	0.411278	0.507809	0.104647	0.00811629
Mtfr1l	0.718666	0.233107	0.647175	0.898352	0.0509531	-0.148408	-0.269631	-0.0702694
Mthfd1	0.513973	0.110892	0.967335	0.880564	0.0695478	0.152848	0.0219165	-0.0613839
Mthfd1l	0.712939	0.187888	0.826005	0.658042	-0.0448018	-0.131104	0.0758115	0.162114
Mtmr2	0.925528	0.411947	0.860861	0.983767	-0.0225606	-0.0957417	-0.0557142	0.017467
Mtpn	0.0715636	0.00123491	0.715532	0.34387	-0.510101	-0.473602	-0.342089	-0.378589
Mug1	0.987569	0.893925	0.62637	0.0474181	-0.00697987	-0.0373629	0.932793	0.963176
Mvd	0.000450263	1.15289e-05	0.759492	0.973604	1.46109	1.64605	0.165552	-0.0194095
Mvk	0.00106713	0.000118333	0.970236	0.953549	1.01994	0.963297	-0.030201	0.0264442
Mvp	0.273744	0.125206	0.87419	0.863623	-0.113078	-0.140225	0.0449127	0.0720598
Myef2	0.00314225	0.000261606	0.862619	0.874392	0.52694	0.647322	0.0525833	-0.0677984
Myh10	0.000486509	0.000345448	0.681871	0.720586	-0.939997	-0.620197	0.218231	-0.10157
Myh11	0.370151	0.433342	0.856242	0.96054	-0.654077	-0.398746	0.37813	0.122798
Myh14	0.84633	0.0918547	0.73056	0.929927	-0.0282918	0.166977	0.153558	-0.0417114
Myh9	0.00234691	0.00238663	0.715358	0.795724	-0.497951	-0.397794	0.176154	0.0759964
Myo18a	0.777156	0.119932	0.759492	0.954888	0.0357774	0.162644	0.148785	0.0219192
Myo1b	0.88839	0.791773	0.834749	0.886235	0.0167212	0.021158	0.0595838	0.055147
Myo1c	0.00333643	0.000252579	0.992686	0.760675	-0.532836	-0.645465	-0.00518084	0.107448
Myo1d	0.000456881	4.12796e-05	0.87095	0.95091	-1.08902	-1.11738	-0.0589058	-0.0305527
Myo1e	0.0737757	0.0823527	0.892518	0.8213	-0.322706	-0.154116	0.0420724	-0.126518
Myo5a	0.00826065	0.00268623	0.991995	0.929761	-0.437842	-0.400303	-0.00514953	-0.0426884
Naca	0.877952	0.358351	0.718858	0.999006	0.116625	-0.540841	-0.659446	-0.00198002
Nap1l1	0.829706	0.0252671	0.841728	0.6794	0.0357248	0.337696	0.078665	-0.223307
Napb	0.00158602	0.000355296	0.995982	0.73937	-0.606095	-0.710131	0.00134137	0.105377
Napg	0.00187975	0.000262496	0.981585	0.988429	-0.573702	-0.56745	0.012223	0.00597159
Ncdn	0.0513493	0.0120849	0.787553	0.892989	-0.320902	-0.326571	-0.088783	-0.0831139
Nckipsd	0.00191704	0.00108323	0.887872	0.919834	-0.661394	-0.639546	0.0676685	0.0458209
Ncl	0.00980981	0.00136339	0.995982	0.818151	0.364193	0.441441	0.00330945	-0.0739385
Ndrg2	0.779314	0.0682897	0.67432	0.966683	-0.0849463	-0.508313	-0.364249	0.0591169
Ndrg4	0.124603	0.0217108	0.991995	0.966683	0.265404	0.28112	-0.0080879	-0.0238043
Ndufa12	0.777156	0.019536	0.67432	0.850789	-0.0732415	-0.46003	-0.197024	0.189764
Ndufab1	0.907246	0.576338	0.698955	0.934035	0.0521385	-0.193611	-0.396415	-0.150666
Ndufb8	0.454919	0.0313678	0.79553	0.951159	-0.198344	-0.456347	-0.200332	0.0576707
Ndufs1	0.403085	0.0185619	0.748746	0.884653	-0.173169	-0.487235	-0.174135	0.139932
Nedd4l	0.0584218	0.016611	0.970455	0.991225	-0.300727	-0.282555	0.0236261	0.0054543
Nefh	0.000295629	4.06681e-05	0.802162	0.921098	-1.02872	-1.08014	-0.0898124	-0.0383941
Nefl	0.0011453	5.23023e-05	0.912784	0.976759	-0.79212	-0.821708	-0.0417683	-0.0121798
Nefm	0.00088855	0.000419089	0.885105	0.783375	-0.790917	-0.797906	0.0768637	0.0838523
Nek7	0.00625866	0.000739311	0.79553	0.984538	-0.418638	-0.521759	-0.0954804	0.00764076
Nes	0.0255013	0.00056222	0.667241	0.620092	0.266285	0.665284	0.260956	-0.138043
Nexn	0.0167917	0.000440018	0.83534	0.906833	-0.805398	-1.06909	-0.179004	0.0846835
Nf1	0.343855	0.253743	0.995721	0.981887	0.126935	0.117286	0.00290819	0.0125576
Nfasc	0.8189	0.414304	0.824647	0.946143	-0.0368349	0.0789915	0.07954	-0.0362863
Ngfr	0.998156	0.0229381	0.555489	0.946978	0.00105723	0.573272	0.476051	-0.0961631
Nid1	0.025325	0.00258594	0.983132	0.964083	-0.32583	-0.35585	-0.0103584	0.0196612
Nid2	0.0416234	0.0111435	0.912771	0.965603	-0.290922	-0.356416	-0.0402434	0.0252511
Nipsnap1	0.0263325	0.00142377	0.804874	0.999006	-0.488583	-0.601413	-0.113974	-0.00114427
Nme1	0.276564	0.534743	0.910208	0.749536	-0.258116	0.216924	0.130524	-0.344516
Nme2	0.21296	0.394495	0.913965	0.919834	-0.299163	-0.137188	0.0809896	-0.0809847
Nol3	0.00194689	0.0326316	0.892518	0.620092	-0.878016	-0.622863	-0.10839	-0.363543
Nono	0.010419	0.00148438	0.935573	0.968398	0.413615	0.433142	0.0361688	0.016642
Npl	0.127345	0.14514	0.829767	0.908544	-0.257435	-0.277463	0.0864448	0.106472
Nqo2	0.000450263	0.000252579	0.939155	0.628401	-0.916699	-0.810919	-0.040089	-0.145869
Nrbp2	0.409734	0.300308	0.98313	0.963811	0.103547	0.0909442	0.0107111	0.0233143
Nsf	0.00230208	0.000184212	0.969919	0.856284	-0.553374	-0.642543	-0.0167771	0.0723916
Ntpcr	0.6063	0.697464	0.90823	0.973604	0.0830161	0.047606	-0.0562199	-0.0208098
Nucb1	0.002575	0.000143292	0.892317	0.904811	0.570903	0.663351	0.0441368	-0.0483113
Oat	0.511883	0.496985	0.864894	0.843862	-0.0771129	0.0800081	0.0661377	-0.0909833
Ogn	0.00225122	0.000352791	0.934872	0.669859	-0.66748	-0.777935	0.0449237	0.155379
Ola1	0.0243306	0.0612772	0.988412	0.818151	-0.258203	-0.17847	0.0079167	-0.0718165
Orm1	0.0557357	0.251223	0.817314	0.844547	-0.968052	-0.663995	0.575496	0.271439
Osbpl1a	0.341108	0.566941	0.845357	0.936698	-0.179412	-0.0560801	0.0724926	-0.0508388
Ostf1	0.795152	0.428389	0.685111	0.822265	-0.0314892	-0.0997284	-0.180082	-0.111843
Otub1	0.00432735	0.00188829	0.899934	0.847285	-0.480249	-0.45412	-0.0483812	-0.0745099
Oxr1	0.00118114	0.00027384	0.910208	0.91201	-0.752573	-0.660197	0.0471174	-0.045258
P4hb	0.0516865	0.0021483	0.757576	0.908544	0.248591	0.434151	0.138958	-0.0466019
Pa2g4	0.0397737	0.00153269	0.925635	0.818151	0.281945	0.394949	0.0432119	-0.0697923
Pabpc1	0.00514557	0.000575863	0.864145	0.929761	0.397171	0.479627	0.0514463	-0.0310095
Pacsin1	0.00110038	0.000172519	0.88592	0.924	-0.714689	-0.810405	-0.0559795	0.0397366
Pacsin2	0.0123733	0.00378832	0.974877	0.969962	-0.301042	-0.329069	-0.0140557	0.0139714
Pacsin3	0.0928973	0.00591784	0.857846	0.927937	-0.367891	-0.534992	-0.0975845	0.0695163
Pafah1b1	0.196161	0.134445	0.93798	0.989074	-0.17201	-0.131904	0.0329521	-0.00715392
Paics	0.0898366	0.00606811	0.791392	0.936431	-0.220485	-0.277786	-0.0898221	-0.0325215
Pak2	0.671932	0.574092	0.957841	0.840724	-0.0449819	0.0488336	0.0249526	-0.068863
Palm	0.0021714	0.000199904	0.975539	0.907295	-0.66248	-0.693056	0.0184933	0.0490691
Pals2	0.547148	0.0848208	0.839161	0.921643	-0.072844	-0.183644	-0.0597784	0.0510219
Pc	0.0631647	0.0216757	0.912784	0.773191	-0.640903	-0.531018	-0.116581	-0.226465
Pcbp1	0.373044	0.853064	0.791392	0.934035	0.107525	0.0190672	-0.118761	-0.0303035
Pcmt1	0.00159876	0.000262887	0.932233	0.993201	-0.666776	-0.708319	-0.0378142	0.003729
Pcolce	0.000491845	8.08471e-05	0.753606	0.818151	1.06263	1.10531	0.153593	0.110917
Pcp4	0.00159876	0.368768	0.79553	0.0425305	-1.61507	-0.28105	0.347368	-0.986656
Pcsk1n	0.0550455	0.14588	0.645443	0.820759	1.31725	0.625769	-1.14075	-0.449263
Pcyt2	0.0312491	0.000313902	0.773671	0.734939	0.321032	0.554408	0.112354	-0.121022
Pdcd5	0.0216001	0.0166436	0.838476	0.749536	-0.330881	-0.281343	-0.0712003	-0.120738
Pdcd6	0.00492086	0.000708449	0.856548	0.946978	-0.54742	-0.518545	0.0602053	0.0313301
Pdcd6ip	0.013179	0.000853363	0.901032	0.84576	-0.322786	-0.42861	-0.0356944	0.0701299
Pdhb	0.106098	0.00188862	0.685111	0.883923	-0.309676	-0.667845	-0.248312	0.109858
Pdia3	0.0456826	0.00697972	0.791392	0.997684	0.229121	0.325645	0.0955465	-0.000977664
Pdia4	0.00547754	0.000419089	0.759492	0.979238	0.439482	0.568812	0.119429	-0.00990101
Pdia6	0.0154445	0.0044065	0.799883	0.978987	0.327734	0.422039	0.105887	0.0115816
Pdlim1	0.0794229	0.00961934	0.910208	0.789918	-0.539822	-0.943215	-0.133008	0.270386
Pdlim4	0.000935316	0.000178954	0.899934	0.73937	-0.958125	-1.16539	-0.0793995	0.127865
Pds5b	0.00152927	0.000644818	0.734578	0.929761	0.616847	0.454292	-0.132466	0.0300888
Pea15	0.414899	0.297534	0.850989	0.606334	-0.4063	0.265237	0.312733	-0.358804
Pebp1	0.00144438	0.0035779	0.96522	0.657938	-0.678753	-0.551408	-0.0346121	-0.161958
Pepd	0.0836289	0.0332759	0.978219	0.88485	-0.220191	-0.305122	-0.0222884	0.0626423
Pex14	0.028187	0.0809529	0.970236	0.995946	0.331225	0.299161	-0.0298398	0.00222429
Pfas	0.449132	0.578792	0.910208	0.929761	0.090981	0.0743939	-0.0593634	-0.0427764
Pfkl	0.00563309	0.0225293	0.875204	0.809903	-0.496008	-0.317709	0.0648234	-0.113475
Pfkm	0.367446	0.0267952	0.72913	0.930534	-0.630444	-1.01836	-0.612037	-0.224125
Pfkp	0.00548689	0.000419373	0.791392	0.956183	-0.545986	-0.618254	-0.0995714	-0.0273031
Pfn1	0.475612	0.704673	0.916235	0.834835	-0.0977957	-0.0472386	-0.0507778	-0.101335
Pfn2	0.0005099	0.00010948	0.964579	0.888283	-0.787104	-0.76244	-0.0235382	-0.0482023
Pgd	0.987684	0.774702	0.941025	0.888283	0.00220593	0.0234688	-0.0285156	-0.0497785
Pgk1	0.031272	0.0161289	0.671383	0.929761	-0.511984	-0.667412	-0.257799	-0.102371
Pgls	0.410508	0.151337	0.671383	0.442177	-0.187882	-0.222607	-0.405107	-0.370382
Pgm1	0.141511	0.0233569	0.62637	0.936995	-0.68591	-1.0222	-0.505054	-0.16876
Pgm2	0.474977	0.554458	0.868627	0.85005	-0.0832221	-0.0925617	-0.0934786	-0.084139
Pgm2l1	0.001148	0.00105677	0.961221	0.829598	-0.739355	-0.615011	0.0289533	-0.0953911
Pgm3	0.668641	0.193634	0.920835	0.942206	-0.0732881	-0.106407	-0.0586381	-0.025519
Phf24	0.0409195	0.00807712	0.875107	0.809903	-0.32538	-0.261909	-0.0479484	-0.11142
Phgdh	0.0151558	0.0152522	0.838257	0.789918	0.392953	0.226025	-0.0687712	0.0981563
Phyhipl	0.00292225	0.00101827	0.984037	0.773191	-0.728331	-0.61331	-0.0136686	-0.12869
Pin1	0.00615097	0.00636857	0.813495	0.959593	-0.626162	-0.522117	0.133996	0.0299509
Pip4k2a	0.935123	0.997055	0.855294	0.914199	-0.0119088	-0.000456718	0.0742971	0.0628451
Pitpna	0.0257575	0.0417376	0.824067	0.665535	-0.308387	-0.230782	-0.0803075	-0.157913
Pitpnc1	0.00920988	0.0237317	0.753606	0.929761	-0.453947	-0.267564	0.146274	-0.0401092
Pkm	0.0090827	0.00277824	0.791392	0.966683	-0.649021	-0.765293	-0.152274	-0.0360022
Plcb1	0.0653348	0.00328436	0.871037	0.728985	-0.217914	-0.397475	-0.0603431	0.119218
Plcb3	0.0119602	0.000621821	0.901032	0.947039	-0.475337	-0.554629	-0.04424	0.0350517
Plcd1	0.0543424	0.139629	0.777739	0.991225	0.243503	0.13588	-0.11232	-0.00469683
Plekhb1	0.0243814	0.339858	0.62637	0.876417	-0.45497	-0.0910484	0.271938	-0.0919837
Plg	0.255242	0.644738	0.809178	0.485002	-0.273671	-0.0752408	-0.176272	-0.374702
Pls3	0.000976733	0.000501509	0.950301	0.876898	-0.737437	-0.644309	0.0356459	-0.0574811
Plxnb1	0.0168758	0.00210174	0.985685	0.804052	-0.371811	-0.472348	0.00962239	0.110159
Pmp2	0.0192599	0.0187604	0.991578	0.872351	-0.333622	-0.278076	-0.00749151	-0.0630368
Postn	0.00554637	0.000276612	0.903296	0.217205	0.454011	0.868798	0.0489749	-0.365812
Ppia	0.0104477	0.0107019	0.910208	0.804052	-0.378001	-0.335149	-0.0503625	-0.0932143
Ppib	0.00184389	0.000302518	0.759492	0.978009	0.578501	0.701894	0.134587	0.011193
Ppic	0.000211295	1.15289e-05	0.942106	0.697565	1.91057	2.1447	0.0456023	-0.188529
Ppm1e	0.00703149	0.000974488	0.791392	0.84576	-0.593778	-0.591583	-0.107913	-0.110108
Ppp1ca	0.871665	0.264981	0.991995	0.845011	0.0212526	0.102277	-0.00526502	-0.0862896
Ppp2r2a	0.0358634	0.151842	0.814502	0.95091	-0.327756	-0.180209	0.11956	-0.0279878
Ppp3ca	0.00475376	0.000832716	0.797314	0.874933	-0.378516	-0.518927	-0.0745548	0.065856
Ppp5c	0.441287	0.910665	0.969351	0.831495	-0.110996	-0.0191607	-0.0314447	-0.12328
Ppt1	0.76041	0.0775411	0.72393	0.924896	-0.0497146	0.180999	0.180778	-0.0499351
Prdx1	0.261501	0.529311	0.802332	0.934508	-0.115983	-0.0678283	0.0852691	0.0371142
Prdx5	0.00477701	0.000258363	0.734578	0.999006	-0.507228	-0.648218	-0.140707	0.000283301
Prdx6	0.000976733	0.00140799	0.970016	0.562193	-0.777703	-0.596136	0.0311308	-0.150436
Prelp	0.000456881	1.64105e-05	0.681871	0.402613	-1.24295	-1.32806	0.198441	0.283554
Prep	0.263082	0.0180429	0.995982	0.669859	0.132893	0.279894	-0.00330225	-0.150304
Prkar1a	0.0409399	0.0109071	0.934872	0.937385	0.257271	0.32515	0.033482	-0.0343975
Prkar2a	0.241539	0.034868	0.803682	0.913859	-0.179348	-0.243075	-0.116032	-0.0523052
Prkar2b	0.295317	0.350084	0.928205	0.978987	-0.160156	-0.0988661	0.048433	-0.0128573
Prkcd	0.0339765	0.03259	0.979655	0.980405	-0.274475	-0.265465	0.0185012	0.00949092
Prkce	0.0169912	0.171893	0.83534	0.847961	-0.319456	-0.262447	-0.0841338	-0.141143
Prkcsh	0.0428221	0.0096402	0.759749	0.863623	0.228442	0.273961	0.107052	0.0615334
Prpf19	0.00808631	0.000737922	0.865695	0.978009	0.480488	0.548436	0.0521997	-0.0157482
Prph	0.00396713	0.000262496	0.839161	0.975496	-0.622983	-0.695838	-0.087182	-0.0143269
Prpsap1	0.237546	0.828003	0.803181	0.91201	-0.22916	-0.034372	0.0997274	-0.0950602
Prpsap2	0.0446416	0.174175	0.911918	0.989074	-0.255573	-0.187878	0.0609088	-0.00678593
Prune1	0.00568334	0.000612384	0.759492	0.919941	-0.415791	-0.474552	-0.0992274	-0.0404665
Prx	0.000450263	4.96432e-05	0.821632	0.962448	-0.882767	-0.972749	-0.0705245	0.0194575
Psap	0.0448679	0.194792	0.669821	0.933596	0.336141	0.128846	-0.247914	-0.0406188
Psmc2	0.0208125	0.00953373	0.995721	0.936698	0.303861	0.270617	-0.00306811	0.0301756
Psmc3	0.0619454	0.0157021	0.963402	0.919941	0.233169	0.222361	0.0247159	0.0355234
Psmc5	0.0366964	0.0109599	0.946602	0.85005	0.282696	0.251791	0.032165	0.0630707
Psmc6	0.0784173	0.0104705	0.885105	0.840724	0.223587	0.257871	-0.0457963	-0.0800803
Psmd11	0.00903877	0.00623331	0.890004	0.804052	0.357544	0.321722	0.048279	0.0841015
Psmd13	0.0126715	0.0013596	0.843146	0.906833	0.30303	0.40037	0.0530757	-0.0442644
Psmd3	0.0472701	0.00404543	0.809178	0.822265	0.225186	0.392434	0.0747421	-0.0925059
Psmd5	0.0175017	0.00653557	0.875258	0.98064	-0.325385	-0.361759	-0.0481947	-0.0118208
Psmd6	0.0741543	0.00352001	0.874753	0.804052	0.253841	0.427958	0.0661643	-0.107952
Psmd7	0.107397	0.0219959	0.821632	0.947738	0.30018	0.362554	0.106797	0.0444232
Psmd9	0.103893	0.00678947	0.771822	0.924	-0.172269	-0.30826	-0.0975119	0.0384786
Psme2	0.890608	0.0978844	0.885755	0.822265	0.0205868	0.180994	0.0490641	-0.111343
Psmf1	0.160047	0.664928	0.877291	0.892538	-0.271174	-0.0770812	0.112662	-0.0814311
Ptbp1	0.0159953	0.00190162	0.858441	0.959593	0.37543	0.464171	0.0656608	-0.0230804
Ptma	0.793911	0.0271579	0.912771	0.460515	0.0723191	0.623835	0.120756	-0.43076
Purb	0.00879474	0.000252579	0.753606	0.929761	0.574462	0.816356	0.203104	-0.0387903
Pygb	0.00533421	0.00116886	0.995982	0.805529	-0.562329	-0.451128	-0.00267653	-0.113878
Pygm	0.746574	0.0400405	0.72393	0.996666	-0.64192	-2.56465	-1.90263	0.0201022
Pzp	0.0367404	0.293614	0.685111	0.6794	-0.71869	0.442031	0.548708	-0.612013
Qdpr	0.00720064	0.00241368	0.839272	0.983767	-0.391365	-0.443641	-0.0619336	-0.00965722
Rab14	0.296039	0.145328	0.842669	0.78727	-0.106395	-0.13021	0.0641101	0.0879257
Rab18	0.0819982	0.0155411	0.988412	0.87908	-0.201015	-0.27411	-0.00723076	0.0658646
Rab22a	0.907246	0.450606	0.970455	0.876898	-0.0305176	0.169117	0.037673	-0.161962
Rab3a	0.116103	0.0337615	0.910208	0.978987	-0.255396	-0.222931	0.0472131	0.0147486
Rab3gap1	0.947344	0.056439	0.759749	0.899131	-0.00986369	-0.19105	-0.12265	0.0585362
Rab5b	0.0226019	0.0204226	0.902152	0.9397	-0.476828	-0.367623	0.0578772	-0.0513276
Rack1	0.002723	0.00136927	0.983132	0.911731	0.488536	0.436119	-0.0115379	0.0408787
Ralb	0.538222	0.383825	0.753606	0.993867	-0.147094	0.199615	0.340492	-0.00621602
Ran	0.02151	0.00406137	0.81015	0.946143	-0.278972	-0.397249	-0.093746	0.0245312
Rbbp4	0.00942989	0.000357279	0.734146	0.978987	0.501859	0.654766	0.165909	0.013001
Rbm14	0.0118498	0.0019052	0.992544	0.942206	0.393633	0.417955	-0.0056812	-0.0300035
Rbm3	0.325388	0.018136	0.954444	0.892538	0.398911	0.559682	-0.051741	-0.212513
Rbm39	0.0425027	0.00201775	0.791392	0.913859	0.35241	0.411361	0.113664	0.0547138
Rcc2	0.00408299	0.000910829	0.753606	0.620092	0.466147	0.516327	-0.117764	-0.167944
Rcn1	0.00269974	4.20646e-05	0.784969	0.52551	0.633201	0.914234	0.124466	-0.156567
Rcn3	0.0107508	0.000311966	0.685111	0.863623	0.726265	1.23393	0.387792	-0.119868
Rhob	0.202648	0.00804255	0.82265	0.899491	-0.166331	-0.301958	-0.0780336	0.0575929
Rhoc	0.363252	0.0184923	0.766705	0.978987	-0.135863	-0.264116	-0.140776	-0.0125231
Rida	0.000433316	0.000142712	0.805868	0.606334	-1.07172	-0.82528	0.111322	-0.135114
Rimkla	0.00304165	0.000577303	0.857846	0.804052	-0.618444	-0.581599	-0.0667093	-0.103554
Rnase4	0.734445	0.901554	0.791392	0.756383	-0.0698959	0.0530489	-0.270589	-0.393534
Rnh1	0.388392	0.00573076	0.717496	0.888283	-0.160516	-0.355559	-0.264427	-0.0693845
Rpl10	0.0388014	0.00887776	0.737482	0.845011	0.497059	1.1106	0.381086	-0.232456
Rpl10a	0.01104	0.000234971	0.841728	0.981887	0.543199	0.641375	0.0877832	-0.0103921
Rpl11	0.00107385	0.00047102	0.81015	0.981894	0.686467	0.607199	-0.0689532	0.0103144
Rpl12	0.00199992	0.00109183	0.98043	0.934035	0.66976	0.64921	0.0186933	0.0392431
Rpl13	0.0310746	0.00810851	0.885557	0.959593	0.353298	0.409256	0.0776983	0.021741
Rpl13a	0.002723	0.000172519	0.801189	0.756383	0.571253	0.780749	0.0922696	-0.117226
Rpl14	0.0380352	0.00171478	0.936965	0.620092	0.510279	0.617907	-0.0723659	-0.179995
Rpl15	0.0102169	0.00184322	0.950301	0.822265	0.463781	0.595432	0.0470579	-0.0845928
Rpl17	0.0210056	0.000417659	0.753416	0.863474	0.454833	0.723667	0.176259	-0.0925743
Rpl18	0.00603556	0.00427326	0.864583	0.946069	0.449472	0.492136	0.0745305	0.0318665
Rpl18a	0.00855318	0.000855724	0.911617	0.802515	0.592388	0.696196	-0.0506663	-0.154474
Rpl19	0.0265042	0.00200912	0.821632	0.942756	0.395429	0.545721	0.116307	-0.0339844
Rpl21	0.0735711	0.00261025	0.83528	0.969962	0.396273	0.527903	0.104717	-0.0269136
Rpl22	0.0374352	0.0122241	0.817314	0.999006	0.484881	0.68227	0.196663	-0.000726187
Rpl23	0.00615097	0.00108342	0.970398	0.95091	0.550707	0.554854	-0.0248545	-0.0290015
Rpl24	0.00660522	0.000708449	0.821632	0.816443	0.582931	0.57817	-0.105191	-0.10043
Rpl26	0.0367187	0.000377172	0.777739	0.945025	0.412415	0.590365	0.142792	-0.035158
Rpl27	0.00529222	0.000458658	0.972626	0.893734	0.551062	0.631146	0.0223399	-0.0577441
Rpl27a	0.0045962	0.00818804	0.72393	0.954939	0.574557	0.367885	-0.226753	-0.020081
Rpl28	0.0225177	0.00079569	0.884387	0.934035	0.469967	0.58017	0.0609976	-0.0492047
Rpl3	0.00626536	0.00075484	0.817547	0.856284	0.408989	0.565453	0.0883745	-0.0680891
Rpl30	0.00143311	0.00101566	0.902152	0.93719	0.548493	0.630487	0.0478891	-0.0341058
Rpl31	0.00412248	0.00138704	0.760932	0.705037	0.586753	0.556002	0.134059	0.164809
Rpl35a	0.011658	0.00117725	0.79553	0.929761	0.45515	0.632512	0.135809	-0.0415525
Rpl36	0.0628292	0.037636	0.946111	0.950758	0.404144	0.527186	0.068588	-0.0544537
Rpl37a	0.00819195	0.00136927	0.887872	0.84576	0.763241	0.810051	-0.0911296	-0.13794
Rpl4	0.00337147	0.00145613	0.936965	0.983767	0.496064	0.545791	0.0413865	-0.00834083
Rpl5	0.00187975	0.0013201	0.895641	0.930534	0.501316	0.517848	0.048758	0.0322255
Rpl6	0.00730514	0.00033168	0.820054	0.888283	0.57259	0.601496	0.0970078	0.0681011
Rpl7	0.00533076	0.000336295	0.767396	0.876577	0.409545	0.570948	0.105902	-0.0554999
Rpl7a	0.00187975	0.000140302	0.717496	0.949082	0.543592	0.719179	0.153102	-0.0224851
Rpl8	0.0202249	0.00117451	0.73056	0.927475	0.459646	0.582115	0.17817	0.0557013
Rpl9	0.00235423	0.00237511	0.970926	0.899391	0.644224	0.554521	-0.0231817	0.0665214
Rplp0	0.00235423	0.00258758	0.93077	0.978987	0.498539	0.52478	0.039039	0.0127981
Rplp2	0.00647563	0.00237871	0.821632	0.912241	0.557971	0.53166	-0.0912374	-0.0649263
Rpn1	0.00532641	0.000436432	0.681871	0.924	0.420744	0.566289	0.181283	0.0357383
Rpn2	0.0187164	0.000419089	0.742922	0.930534	0.410409	0.605403	0.155451	-0.0395426
Rps10	0.00756919	0.000261145	0.894539	0.950283	0.619867	0.715543	0.062788	-0.0328881
Rps11	0.00855318	0.000194332	0.82661	0.936431	0.502591	0.618089	0.0823991	-0.0330988
Rps12	0.0896499	0.0749314	0.791392	0.927475	0.443327	0.182222	-0.213467	0.0476378
Rps13	0.0353234	0.00476432	0.872509	0.868602	0.364058	0.543212	0.0854423	-0.0937115
Rps14	0.0118523	0.00102543	0.791392	0.991225	0.392981	0.499549	0.101418	-0.00514967
Rps15	0.0162913	0.0121201	0.842499	0.738922	0.372302	0.3414	0.0865866	0.117489
Rps15a	0.00405508	0.0117775	0.995721	0.959593	0.444635	0.431047	0.00545124	0.0190391
Rps16	0.00187975	0.000226502	0.810317	0.915679	0.591128	0.719205	0.0853014	-0.042775
Rps17	0.0199181	0.000168834	0.839161	0.911406	0.654925	0.817138	0.0612466	-0.100967
Rps18	0.00888727	0.000408584	0.753606	0.978009	0.502539	0.656279	0.13792	-0.0158193
Rps19	0.0106388	0.00031089	0.817314	0.934035	0.577204	0.634704	0.10176	0.04426
Rps2	0.0043742	0.000502835	0.919913	0.950758	0.489425	0.502447	0.0370719	0.0240496
Rps20	0.00733375	0.00325223	0.992686	0.829598	0.482601	0.411471	0.00683131	0.0779606
Rps21	0.030529	0.0226469	0.883825	0.572834	0.373967	0.280912	0.0770575	0.170112
Rps23	0.00318412	0.00126343	0.831444	0.872351	0.802447	0.778518	-0.123888	-0.0999597
Rps25	0.00133181	0.000258382	0.81153	0.760675	0.693542	0.682074	0.0900703	0.101538
Rps28	0.212225	0.0235009	0.681871	0.582683	0.214899	0.267108	0.263378	0.211168
Rps29	0.0137475	0.000779408	0.829973	0.909043	0.651071	0.654766	-0.0872588	-0.0909541
Rps3	0.00187975	0.00109097	0.985685	0.912241	0.576831	0.538163	0.00923196	0.0478994
Rps3a	0.0100114	0.00572968	0.974877	0.929257	0.416444	0.399458	0.0215133	0.0384994
Rps4x	0.00145528	0.000640427	0.785162	0.97791	0.682313	0.548489	-0.123218	0.0106051
Rps5	0.00459059	0.000939584	0.954444	0.738922	0.556992	0.403814	-0.0226868	0.130491
Rps6	0.017985	0.0899692	0.995982	0.942206	0.305727	0.281867	0.00207	0.02593
Rps7	0.0119366	0.00168278	0.821632	0.978009	0.407014	0.485148	0.0910489	0.0129144
Rps8	0.00165347	0.0017309	0.887231	0.950758	0.554367	0.476169	-0.0572414	0.0209572
Rps9	0.00519365	0.00101939	0.846642	0.965603	0.52248	0.575865	0.0752754	0.0218902
Rpsa	0.00187975	0.000245704	0.892518	0.8213	0.553741	0.674424	0.0502875	-0.0703945
Rras	0.00276099	0.00829976	0.821632	0.876484	-0.545671	-0.384064	0.0911953	-0.0704123
Rrbp1	0.000839886	7.73976e-05	0.67432	0.850789	0.756755	0.884877	0.195647	0.0675251
RtcA	0.00500038	0.00305244	0.900103	0.995311	-0.483161	-0.435606	0.0453879	-0.00216752
Rtn1	0.627441	0.273033	0.966367	0.9337	0.0592193	0.125717	0.0244004	-0.0420972
Rtn3	0.0663197	0.0177992	0.959868	0.978987	-0.236866	-0.247071	-0.0228382	-0.0126331
Rufy3	0.00273974	0.000187635	0.817547	0.945002	-0.621149	-0.721099	-0.0649375	0.0350123
Ruvbl1	0.433075	0.735312	0.916235	0.967805	0.0697133	0.0252744	-0.0310003	0.0134385
S100a11	0.092982	0.107539	0.799883	0.681619	-0.316064	-0.276013	-0.172395	-0.212446
S100a4	0.0158924	0.0100752	0.988876	0.995311	-0.902836	-0.874863	0.0229363	-0.00503667
Sae1	0.0175921	0.00362601	0.841728	0.883923	0.329669	0.477848	0.0753566	-0.0728222
Safb	0.201436	0.0128671	0.79553	0.818151	0.239284	0.299727	0.156976	0.0965329
Samhd1	0.14384	0.00774232	0.922055	0.734939	-0.253695	-0.466441	-0.0675246	0.145222
Sars1	0.520924	0.172472	0.760379	0.888283	-0.067265	-0.115755	-0.102718	-0.0542271
Scamp2	0.831726	0.579629	0.73517	0.831851	0.044103	0.13752	0.285002	0.191585
Scarb2	0.574387	0.316555	0.979655	0.644325	0.0721413	-0.128137	-0.0194036	0.180875
Sccpdh	0.0154263	0.0198699	0.766627	0.967732	0.348116	0.256771	-0.109562	-0.0182164
Scp2	0.933487	0.985328	0.759492	0.68358	0.0123742	-0.00221862	0.134814	0.149406
Scpep1	0.0285543	0.042066	0.983132	0.967482	0.287894	0.274373	0.0102806	0.0238023
Scrn3	0.000450263	0.00210513	0.984037	0.734939	-0.944171	-0.752244	-0.0121825	-0.204109
Sdcbp	0.0153319	0.0290687	0.827897	0.965691	-0.623686	-0.46783	0.114052	-0.041804
Sec13	0.0148572	0.0319193	0.916235	0.959251	0.384176	0.386732	0.0402807	0.0377244
Sec23b	0.0028478	0.00842875	0.800798	0.818151	0.545172	0.352716	-0.0953741	0.0970815
Sec31a	0.00256373	0.000301671	0.770217	0.728985	0.518992	0.497416	0.0878718	0.109448
Sec61a1	0.000444395	0.000490146	0.669821	0.891106	1.04653	1.0939	0.162344	0.114968
Sec61b	0.0261023	0.00237938	0.681871	0.942206	0.541305	0.764915	0.285419	0.0618097
Sec63	0.00189599	0.00248087	0.820054	0.988564	0.499795	0.428302	-0.0642569	0.00723605
Sephs1	0.0131205	0.0176529	0.757576	0.947039	0.445421	0.276205	-0.137054	0.0321622
Serpina1c	0.0703364	0.0352529	0.778385	0.553011	-0.438108	-0.495944	0.269793	0.327629
Serpinb1a	0.00182881	0.000588208	0.918248	0.606334	-0.766092	-0.640434	-0.0518306	-0.177489
Serpinf1	0.852625	0.00795476	0.747585	0.467398	0.0217696	0.420629	0.154178	-0.244681
Serping1	0.184844	0.585854	0.821632	0.820759	-0.144099	0.0905806	0.106419	-0.128261
Serpinh1	0.000444395	1.76661e-05	0.664733	0.934402	1.29594	1.64757	0.316083	-0.0355483
Set	0.00458866	0.00287957	0.92958	0.945002	0.696906	0.737682	0.0753894	0.0346135
Sf1	0.0637434	0.0109071	0.821632	0.975349	0.280068	0.377896	0.0769553	-0.0208731
Sf3a1	0.00749829	0.00432633	0.995721	0.824189	0.484464	0.382741	-0.00351876	0.0982042
Sf3b1	0.0123119	0.00106604	0.848622	0.863623	0.418195	0.425178	0.0714324	0.0644496
Sfpq	0.0137702	0.0023793	0.848622	0.969962	0.391794	0.436191	0.0630255	0.0186288
Sgcd	0.00110038	0.000254231	0.753606	0.936431	-0.672715	-0.770103	-0.130722	-0.0333344
Sgpl1	0.0268617	0.00382951	0.759749	0.947039	0.304916	0.419277	0.141075	0.0267133
Sh3bgrl2	0.00468185	0.00547686	0.79203	0.705037	-0.852557	-0.725755	-0.164889	-0.29169
Sh3gl2	0.00101485	9.83028e-05	0.994416	0.929405	-0.890446	-0.943434	-0.00402159	0.0489669
Sh3glb2	0.0322693	0.00547686	0.942106	0.886745	-0.374026	-0.270473	0.0277659	-0.0757865
Sirt2	0.07679	0.0581553	0.960547	0.913859	-0.224489	-0.157275	0.0211761	-0.0460378
Skp1	0.00630727	0.107201	0.817547	0.75917	-0.631219	-0.313651	0.178974	-0.138594
Slc25a32	0.732375	0.119496	0.685111	0.880564	0.216107	-0.717561	-0.524514	0.409153
Slc25a4	0.572198	0.0171325	0.73056	0.904828	-0.218426	-0.778563	-0.371556	0.188581
Slc2a1	0.000703671	3.65787e-05	0.98313	0.818151	-1.0017	-1.09508	0.0132197	0.106596
Slc4a1	0.076165	0.323355	0.777739	0.767006	-0.824546	1.09762	0.815678	-1.10649
Slc5a3	0.315259	0.102897	0.942602	0.887109	-0.258542	-0.203251	-0.0583118	-0.113603
Smarca4	0.0155213	0.00319288	0.985685	0.737803	0.399382	0.54476	-0.0117225	-0.157101
Snap25	0.154063	0.833782	0.791392	0.906098	-0.232555	-0.0252103	0.151565	-0.05578
Snd1	0.0035636	0.000226502	0.745613	0.996666	0.452476	0.574978	0.121479	-0.00102249
Snrpd2	0.00625134	0.000521014	0.873169	0.965603	0.448964	0.491569	0.0583353	0.0157309
Snrpd3	0.00633409	0.00443785	0.84259	0.981887	0.4731	0.589319	0.104265	-0.0119538
Snrpe	0.105631	0.0543329	0.98313	0.871534	0.303944	0.41823	-0.0219039	-0.13619
Snrpf	0.0399712	0.119496	0.915971	0.934035	0.463308	0.45334	0.0852995	0.095267
Snrpg	0.0350087	0.000458262	0.717496	0.929927	0.412837	0.68516	0.22476	-0.0475639
Snta1	0.087667	0.00116016	0.87861	0.435301	-0.194616	-0.437467	-0.0532692	0.189582
Sntb1	0.000450263	6.40232e-05	0.777739	0.929761	-0.93059	-0.874655	0.0940827	0.0381474
Sod1	0.000609482	0.000471196	0.965643	0.683342	-0.915308	-0.747878	0.0327124	-0.134717
Sod2	0.0312631	0.00352169	0.98313	0.954105	-0.507956	-0.505076	-0.0258089	-0.0286881
Sod3	0.00191704	0.00214974	0.927105	0.965445	-0.782632	-0.813367	-0.0623134	-0.0315779
Sorbs2	0.087751	0.0598826	0.842669	0.969503	-1.01631	-0.678956	0.259676	-0.077681
Sorbs3	0.028546	0.0322112	0.910208	0.91366	-0.289181	-0.205547	0.0396695	-0.0439643
Sord	0.000450263	0.00109937	0.773671	0.577419	-0.900857	-0.588469	0.123151	-0.189237
Sparc	0.00267468	0.000261145	0.965546	0.809903	0.795636	0.915749	-0.0267406	-0.146854
Spr	0.00376641	0.000299329	0.696987	0.906833	-0.608239	-0.823038	-0.260993	-0.0461933
Spta1	0.0660407	0.328186	0.759492	0.773191	-0.961985	1.12059	0.960676	-1.12189
Sptan1	0.0103288	0.00174914	0.887231	0.978982	-0.40215	-0.368684	0.0452761	0.0118101
Sptb	0.00625134	0.893481	0.759749	0.876484	-0.811742	-0.0724914	0.48588	-0.253371
Sptbn1	0.0124748	0.00845443	0.768959	0.997211	-0.379455	-0.271164	0.109345	0.00105447
Srgap2	0.473526	0.0867675	0.737238	0.919941	0.0795775	0.170085	0.13366	0.0431521
Srm	0.120251	0.0409359	0.817314	0.804884	0.227167	0.238593	-0.0995997	-0.111025
Srsf1	0.00767537	0.028183	0.896919	0.789655	0.377699	0.24056	-0.0495556	0.0875827
Srsf2	0.0487416	0.0162176	0.916235	0.994025	0.421617	0.345879	-0.0726038	0.00313384
Srsf6	0.00977981	0.000785114	0.779041	0.705037	0.456654	0.783893	0.136849	-0.19039
Srsf7	0.0152232	0.0100668	0.804874	0.921643	0.35881	0.30036	-0.0972961	-0.038846
Ssb	0.00843643	0.019007	0.844793	0.929761	0.413787	0.303437	-0.0663912	0.0439586
Ssr1	0.00333643	0.000841359	0.766705	0.983767	0.581992	0.768973	0.177416	-0.00956386
St13	0.00427791	0.000841359	0.919913	0.856158	-0.426154	-0.463801	0.0312385	0.0688859
Stard10	0.000491845	0.000974488	0.811981	0.591872	-0.974558	-0.665829	0.106039	-0.202689
Stat1	0.109202	0.0352479	0.734146	0.28794	-0.183241	0.189849	0.140738	-0.232352
Steap3	0.0411055	0.0178693	0.820054	0.773191	0.293529	0.345423	-0.0887643	-0.140658
Stip1	0.0127129	0.000734175	0.967335	0.818151	-0.341264	-0.44409	-0.0185888	0.0842372
Stmn2	0.145613	0.0246912	0.62637	0.590475	-0.324173	0.459454	0.409706	-0.37392
Stoml2	0.991378	0.995978	0.759492	0.823222	-0.00170792	-0.000575395	0.111892	0.11076
Strap	0.0649603	0.0521848	0.985476	0.922087	-0.206235	-0.162398	0.00787594	-0.0359612
Stt3a	0.00252345	8.67943e-05	0.848731	0.833272	0.580544	0.713614	0.0611548	-0.0719151
Stxbp1	0.0112159	0.00442014	0.785162	0.945002	-0.45888	-0.357664	0.129252	0.0280365
Sub1	0.0287293	0.000264008	0.794271	0.620092	0.536214	0.942372	0.183823	-0.222336
Sucla2	0.348903	0.00290809	0.717477	0.855346	-0.231942	-0.657719	-0.260033	0.165744
Sugt1	0.015903	0.0146352	0.995721	0.724723	-0.320833	-0.212734	-0.00299763	-0.111097
Sult4a1	0.00772632	0.00529279	0.995982	0.929761	-0.587726	-0.531543	0.00165801	-0.054525
Susd2	0.000645046	5.1171e-05	0.878706	0.942206	-0.969751	-0.996953	-0.0585249	-0.0313233
Syn2	0.00547912	0.000690511	0.685111	0.820759	-0.597011	-0.539439	0.17191	0.114337
Syncrip	0.00166561	0.000331539	0.988412	0.969398	0.596958	0.619007	0.00848824	-0.0135607
Syne2	0.514962	0.625511	0.856548	0.790663	0.0654193	0.035886	0.0510156	0.0805489
Synj1	0.00227117	0.00010948	0.975437	0.845011	-0.65584	-0.723043	0.0153688	0.0825722
Synm	0.00321046	0.000222026	0.829767	0.991225	-0.574736	-0.65509	-0.0755852	0.00476842
Tagln2	0.00592747	0.00291129	0.974877	0.937385	-0.581076	-0.558097	-0.0223064	-0.0452859
Tagln3	0.000941038	0.000121075	0.995982	0.957328	-1.01603	-0.983419	-0.0023794	-0.0349932
Taldo1	0.321817	0.567271	0.940363	0.683342	-0.09402	0.0438784	0.0275098	-0.110389
Tardbp	0.00309942	0.00137749	0.984037	0.955835	0.46947	0.438605	-0.00852511	0.0223401
Tbc1d13	0.245508	0.410599	0.812556	0.696557	-0.174341	-0.0723967	-0.0777224	-0.179666
Tbcb	0.00235423	0.0037863	0.783319	0.893734	-0.503357	-0.35698	0.0953035	-0.0510734
Tcea1	0.234158	0.00420132	0.857611	0.697565	0.151216	0.366524	0.0593601	-0.155948
Tcp1	0.662485	0.302076	0.926217	0.990764	-0.0478699	-0.0881305	-0.0353622	0.00489848
Tdrkh	0.127738	0.00211693	0.768943	0.780767	0.234528	0.504467	0.131169	-0.13877
Tgm2	0.00512164	0.000872861	0.942106	0.63919	-0.883204	-0.999263	0.0804455	0.196505
Th	0.271398	0.0501943	0.815151	0.431361	0.164405	-0.205995	-0.0901058	0.280294
Thbs4	0.194304	0.625159	0.97231	0.886745	0.165305	0.0672988	-0.0252219	0.0727844
Them4	0.343855	0.562296	0.94945	0.893734	0.171969	0.0546271	-0.0360175	0.0813248
Thop1	0.370151	0.103945	0.752812	0.792418	-0.0854558	-0.119826	-0.109823	-0.075453
Thrap3	0.0456272	0.00193876	0.830089	0.907295	0.417283	0.612563	0.127559	-0.0677209
Thy1	0.0221904	7.7397e-05	0.698955	0.953549	-0.569909	-0.81806	-0.278701	-0.0305502
Tmed10	0.014841	0.00103861	0.734578	0.906274	0.343803	0.534431	0.135672	-0.0549555
Tmed2	0.00342943	0.000138537	0.62637	0.876898	0.644872	0.992595	0.250833	-0.0968893
Tmem43	0.0577118	0.0114868	0.919913	0.91201	-0.244921	-0.339401	-0.0484444	0.046035
Tmpo	0.301098	0.381118	0.753606	0.882522	0.0976875	-0.0776159	-0.127927	0.0473764
Tns3	0.0493037	0.0711776	0.864145	0.978982	-0.27004	-0.218859	0.0656071	0.0144261
Tom1l2	0.00536673	0.000786084	0.889653	0.728985	-0.575477	-0.469498	-0.0462493	-0.152229
Tomm22	0.0165393	0.0246116	0.987017	0.995946	0.393773	0.404714	0.0131971	0.00225645
Tomm34	0.00145528	0.00138738	0.734146	0.981887	-0.638031	-0.485298	0.143184	-0.00954832
Top2b	0.00575945	0.00148845	0.916235	0.807056	0.482229	0.437759	0.0439402	0.0884107
Tpd52l2	0.341108	0.840273	0.761101	0.995823	-0.14111	0.0297422	0.17306	0.00220726
Tpm4	0.00556142	0.0338003	0.809178	0.984538	-0.500519	-0.350191	0.141277	-0.00905104
Tpp1	0.0713398	0.0167279	0.820054	0.965691	0.49535	0.666855	0.114521	-0.0569848
Tppp	0.0108263	0.00578216	0.964172	0.904126	-0.590495	-0.480397	0.0388992	-0.0711987
Tppp3	0.000589839	0.0019052	0.88592	0.888283	-0.989157	-0.819576	0.0542619	-0.115319
Trim28	0.00212335	0.000465052	0.894359	0.892538	0.599306	0.599781	0.0523412	0.0518661
Tspan15	0.280402	0.00996228	0.685111	0.978987	-0.187293	-0.365583	-0.196376	-0.0180858
Ttc9	0.0337602	0.0101064	0.645443	0.86654	-0.502889	-0.362142	0.265295	0.124547
Tuba4a	0.00110038	3.97323e-05	0.717496	0.924	-0.82933	-1.04742	-0.176283	0.0418097
Tuba8	0.708951	0.347117	0.821632	0.845011	0.10996	0.263168	-0.119063	-0.272272
Tubb2a	0.00215228	0.00643183	0.954444	0.485002	-0.576213	-0.397035	-0.0309548	-0.210133
Tubb2b	0.0366419	0.11187	0.951551	0.807056	-0.685289	-0.63048	-0.135432	-0.190241
Tubb3	0.000899989	0.00104762	0.887231	0.899131	-0.885917	-0.747099	0.0828763	-0.0559425
Tubb4a	0.00630727	0.00364919	0.880118	0.823222	-0.698118	-0.49778	0.0819129	-0.118425
Tubb4b	0.62955	0.018458	0.717496	0.876484	-0.18485	-0.836255	-0.394879	0.256526
Tubb5	0.208694	0.593958	0.935016	0.942756	-0.155776	-0.0736754	0.045829	-0.0362712
Tubb6	0.00318223	0.000458262	0.928205	0.831495	0.471295	0.585014	0.0293534	-0.0843663
Twf1	0.0979121	0.0681645	0.753606	0.760675	0.167834	0.167953	0.103046	0.102927
Txn	0.00354577	0.000584374	0.726164	0.912241	-0.51859	-0.674431	-0.198506	-0.0426654
Txndc12	0.00398701	0.0004332	0.887231	0.436203	0.695789	0.877218	-0.0835557	-0.264985
Txndc17	0.130432	0.0191854	0.802919	0.929761	-0.304382	-0.39236	-0.148556	-0.0605785
U2af2	0.00309942	0.00196619	0.857846	0.887109	0.57192	0.587708	-0.0657293	-0.0815164
Uap1l1	0.0417179	0.00290852	0.848133	0.9094	-0.263464	-0.376387	-0.0667177	0.0462051
Uba2	0.00372597	0.00109533	0.98313	0.582683	0.44213	0.619741	0.0159261	-0.161685
Ube2n	0.0100203	0.00334412	0.802332	0.921643	-0.362066	-0.396326	-0.0791163	-0.0448566
Ube2o	0.0385704	0.0213188	0.958461	0.995823	-0.281166	-0.25851	0.024596	0.00193952
Ube2v1	0.0399209	0.0024334	0.826746	0.913859	-0.522952	-0.547726	-0.109647	-0.0848728
Ube4a	0.791305	0.350087	0.759749	0.994025	0.0383745	-0.0879617	-0.122769	0.00356745
Ubl3	0.00164042	0.000368527	0.857846	0.952514	-0.85151	-0.81952	0.0680206	0.0360301
Ubqln1	0.054269	0.00122559	0.761887	0.734939	-0.482423	-0.496913	-0.198037	-0.183547
Ufd1	0.850369	0.102868	0.806005	0.923848	-0.0264726	-0.169338	-0.0979954	0.0448698
Ugp2	0.174025	0.00263429	0.645443	0.927475	-0.374362	-0.834696	-0.353503	0.106831
Ugt8	0.000430916	4.06258e-06	0.768736	0.820021	1.88219	2.17297	0.1615	-0.129283
Upf1	0.0282012	0.00599167	0.988412	0.953549	0.259604	0.288656	0.00634455	-0.0227076
Uqcr11	0.120474	0.115377	0.937093	0.932222	-0.461378	-0.458915	-0.0949051	-0.0973675
Uqcrb	0.0941488	0.0619057	0.757576	0.818151	-0.72496	-0.407647	0.486578	0.169265
Urod	0.243763	0.387905	0.768959	0.813052	0.150865	0.128006	-0.153555	-0.130696
Uso1	0.00327757	0.000492834	0.777739	0.913859	0.419068	0.47398	0.0899725	0.0350599
Usp14	0.00178218	0.00755968	0.855309	0.894139	-0.591351	-0.450772	0.0748132	-0.0657653
Usp8	0.11259	0.107343	0.954024	0.926058	-0.227482	-0.204934	-0.032077	-0.0546258
Vamp5	0.000430916	0.00063406	0.62637	0.809903	-0.994099	-0.819647	0.29905	0.124598
Vapb	0.0608643	0.0304693	0.839912	0.93719	-0.22054	-0.249478	-0.063452	-0.0345145
Vars2	0.361326	0.0501029	0.887231	0.412675	-0.184594	0.214867	0.0790562	-0.320406
Vat1l	0.0980716	0.421864	0.83965	0.893056	-0.232304	-0.0857045	0.0900754	-0.0565246
Vdac2	0.042302	0.0377211	0.786995	0.91201	0.253374	0.199222	-0.0987302	-0.0445784
Vim	0.277291	0.904227	0.799475	0.994025	-0.122751	-0.0122367	0.107994	-0.00252028
Vps25	0.927522	0.341517	0.67432	0.913859	-0.0107143	0.131845	0.204272	0.061713
Vps26a	0.88839	0.0873828	0.872509	0.892538	-0.0219805	-0.139082	-0.0485946	0.0685068
Vps35	0.517179	0.205051	0.753416	0.863874	0.0619094	0.106354	0.106727	0.0622826
Vps4b	0.0499111	0.00455697	0.901032	0.979353	-0.331176	-0.302106	0.0425812	0.0135104
Vsnl1	0.00639864	0.00056222	0.952004	0.991225	-0.538852	-0.560369	-0.0276887	-0.00617115
Vtn	0.343855	0.430087	0.83528	0.911771	-0.250231	-0.145477	0.186496	0.0817423
Vwa1	0.00459974	0.000624929	0.838476	0.966464	-0.754223	-0.633452	0.0951685	-0.0256026
Washc5	0.26797	0.0328777	0.842499	0.934035	0.149651	0.181414	0.066815	0.035052
Wbp2	0.00302066	0.000393728	0.921353	0.846336	-0.552466	-0.515689	-0.0345686	-0.0713461
Wdr1	0.0463839	0.100984	0.967481	0.978009	-0.246299	-0.204124	0.0306227	-0.0115519
Xdh	0.0403572	0.000744174	0.817547	0.845011	-0.737447	-1.13166	-0.256889	0.137328
Yif1b	0.0126397	0.000566149	0.79553	0.783385	0.582033	0.893981	0.130353	-0.181595
Ykt6	0.257442	0.247129	0.802332	0.658498	-0.124988	0.111721	0.0955182	-0.14119
Ywhag	0.00464274	0.00397369	0.941025	0.918659	-0.46071	-0.462406	0.0409456	0.0426414
Ywhah	0.22508	0.256036	0.83528	0.919834	-0.162541	-0.104312	0.0934111	0.0351813
Zc2hc1a	0.0217265	0.0573317	0.778385	0.904126	-0.444572	-0.258647	0.0985888	-0.0873369
